# Supplementary material for: Black yeasts are efficient heterologous hosts of a wide range of fungal polyketides
Source: Research Square preprint supplement (doi:10.21203/rs.3.rs-6001933/v1), 2025-02-20
Supplement: Supplementary file 1 [file 619b40642825a2d9a7b163bd.xlsx]

## Sheet: PKS database
Supplementary file 2. PKSs found in the genomes of the strains listed in supplementary file 1 and their domain organization
Genome	Gene	Domain organization	Sequence
Aaosphaeria_arxii_CBS_175.79_CBS_175.79_GCA_010015735.1	g5822	KS-AT-DH-ER-KR-xCP	MEPIAVIGVGLRFPQDAVDSEAFWEMLMKKQCSTSEWPSDRLNVDAFHNPARRETSSIAARGAHFLRDDPALFDASFFSITSAEAAALDPQQCLLLETTYQAFENVGRKTDLGELAGITLEALRGSKTGVYAGTMCNDHKHESLKDVDNIPKYAATGSSAAVLANRAVVGGTNVLLAVEAPISMTRMGFLSPEARSYSFDNRANGYTRGEGVGVVVLKRLSDAIANNDTIRAVIRATGTNQDGYTPGITVPSPISQSRLIRETYEKAKLSPGSTKYFEAHGTGTFVGDPLEAASIGSVFRTHRSESDPIYVGTLKPNIGHLEGASGVAGLIKAILVTEKGILPPNANFERLNSSIAADNLNFLKFPTSPVSFPEEGIFRASVSSFGFGGSNAHAIVDDA…
Aaosphaeria_arxii_CBS_175.79_CBS_175.79_GCA_010015735.1	g10068	KS-AT-DH-MT-ER-KR-xCP	MRGGFCLEEDPRLFDNNLFHINAIETRTMDPAQRKLLEVTYEAFENAGEPWESFAGSKTGVFVGNFMSDHQNMQFRDPDNSMPYVTTGGDIAIHSNRINYVFNLKGPSLTLDTACSSAMYALHIAVSGIRNGDCEAAIVAGSNLISDPGPQMFITKLGALSPTSISHTFDAAADGNGQSEGISYPSPAGQEAVIRQAYRNAGGLDPALTGYFEAHGTGTPVGDPIEVSAIGRVFSKYREDNNPLLIGSIKPNLGHSESASAIASIMKVVLAMEKGEIPPTRGITKFNPKIDFKTSRTKVVTDMTPWPLMPIRRASVNSFGYGGANVSLHKENTSANMSPKRLVLLPFSANDDNALKKIIQAVGREAGDYDIRHLAHTLSRRRSKFSQRAFIISPSDTVP…
Aaosphaeria_arxii_CBS_175.79_CBS_175.79_GCA_010015735.1	g2256	KS-AT-DH-MT-ER-KR-xCP	MDYVDDEEWASEPIAIIGMSCKFSGGASSPAKLWDLMASGRTGWSEIPKDRFDLKGVYHPNHERTSTSHVKGGHFLDEDVAAFDAAFFNYSAEMAQVVDPQFRLQLESTYEALENAGLPLSKVMGTQTSVFAGVFTHDYQDQIIRDEDRLPRFNVVGTWSPMSSNRISHFYDFRGASMTLETGCSTTLVALHQAIQTLRNREADMSMVTGSNVMLNPDTFKAIGSLGMLSPDGRSWAFDSRANGYGRGEGVATVIVKRLSDALAANDPIRAVIRETALNQDGKTDTITTPSGSAQVDLMRECYRRAGLDPRGTQYFEAHGTGTPTGDPIEASAMAAIFANSEGREREANYLHIGSVKTNVGHTEAASGLAAIIKGVLCLEKELLPPSVNLETPNPKLKL…
Aaosphaeria_arxii_CBS_175.79_CBS_175.79_GCA_010015735.1	g5565	KS-AT-DH-MT-ER-KR-xCP	MPLIADDLSPISEDFSVFSESASFDDEEFSQENETITPIAIIGFAFRGPGDATSSEAFWDLLNEKRTAASDYPSERLNLDAFYRDGERRVGELPLKQSHFVKDDIRAFDAGFFSISPAEASAMDPMQRILLETAYQGFENAGIPLSALLGSNTSVYTGSFTTDYQAQLTKDPATIPTYGATGGSASILANRISWFFDLKGPSSLVGGCNLCFSPEYFTMLTNLKMLSDDGRCFSFDSRANGYARGEGFGTVVLKRLDDAIANGDTIRAVIRSTGCNHGGRMPGITQPSKFAQEALVRETYRKAALSMKPTRFCETHGTGTALGDPIESMALGRAFKESRTNSDPLILGAVKSNIGHLEGASGIAGLIKTVLVLESGYIPPNANFEKLNPKIDPEYLSIK…
Aaosphaeria_arxii_CBS_175.79_CBS_175.79_GCA_010015735.1	g7628	KS-AT-DH-MT-ER-KR-xCP	MADPVAVTGFAFRFPGDAVTEEAFWDIIAKGQSTMTEVPESRYNINGFHGPKGSSRNSVSCRGGHFIKGDISAFDAPFFAMSPAEARAMDPQLRLMLETAYHALESAGLTMEKVHGTNTSVYVGNLAAEYSSLFTNDDEIHAAYQATGMSGAMLSNRISWFYDLHGPSITIDTACSSGLVGLHLACQSLLQHESEMAIEDGDTIRAIIRGTSTNQDGHTPSITQPSHLAQAALIRQAYKNANLDFDDTQYFEAHGTGTSVGDPIEAYGINEVFSRHANTGNPLFVGSVKANIGHLESAAGIAGVIKAVLSLERGMIPPNALLKNINRAIYADDWNMKTNGVRKQLIISNGVQLAENGHTENTTSNYPHLLILSAADEDGIYRLAATLEKYLSKCGNETT…
Aaosphaeria_arxii_CBS_175.79_CBS_175.79_GCA_010015735.1	g1530	KS-AT-DH-MT-ER-xCP	MPEPIAVVGFAFEFPGNIRTEDAFWDMLVDRKVDAPTIPKDRFNPTAFGPVSEKDLGAWGTQGAHFLREDVGAFDAPFFSISPAEAEGMDPQQRKLLETTYHALENAGIPMDSLRGSKTSVHVGCFTGDYHLMQCKDPDTMPTYHATGNSSAILANRISWFFDLKGPSVMMDTACSSSLVALDQACQALRQNQTSMGIVCGCNLILTPESVTTIGKMGFLSPDGLCHSFDERGNGYARSEGLASLVVKRVSDAIRDKDTIRCVIQATSTNQDGRTINLAQPCEAAQEELLRSTYDTFNLDRSLTRFCEAHGTGTAVGDPIEMNALSSSFHGIRNDADPLFIGATKANLGHLEAASGVAGIIKTILVLEKALIPPIAQLQRVNFRIKAHNLKFPTELTPW…
Aaosphaeria_arxii_CBS_175.79_CBS_175.79_GCA_010015735.1	g5425	KS-AT-DH-MT-KR-xCP	MFDLGDPHLPKPVAIIGTACRLPGKASSLSKLWELLLHPRDLLKEIPQDRFQWKGFYRPDSLLSTSKSIKGYFLEENIRNFDPTFFNIAPSEAENIDPQQRLLLENVYEAIESAGLTLKQLQGSDTGVFVGAMSNEYFDNANVDVDGANGTLLTTGTSRSIASNRISYVFDFKGPSMTIDTACSSSLVAVHLAVSALRQGECKVAFACGAHLNLSPNEWIALSKMNMISSDGRSKHLDATANGYGRGEGTSVVCLKLLEDAVKDGDHIECVIRQTGINQDGRTKGITMPSAEAQADLIRRTYNSVGLDPTKLDHRPSFFEAHGTGTPAGDPVEAQAVQDAFFPPGQNYNDEVLHIGSIKTIIGHTEGTAGVAGLLRASLAVSHGILPPSLHMSNLNPAV…
Aaosphaeria_arxii_CBS_175.79_CBS_175.79_GCA_010015735.1	g6947	KS-AT-DH-MT-KR-xCP	MSQTRKPIAICGLALRLPGNVNSAEKLWEALRDGRDMRGPVPKSRYNNEGFGDALGEKGAIKSQHGYFLEEDPGCFDTSMFSLTEEEAQRTDPQQRLLLEIAYECFENSGLTKYRGSTTGTYIGTFGEDWLYSQAKEDQHSGGYILGGQADLMLANRVSYEYDLHGPSMVIKTGCSATLVALHEACRALQLGDCSGALVAGSNLILGPTLTAAMASEGILSPEGSCKSFSAEADGFARGEAVVAVYITTLDRAVQENLPIRAVIANTGVNSNGKSASILQPNMNAQAELIRRVYADINLKPHRTAYVECHGTGTPTGDPIEVTAVGEVFGTQGVMIGSLKPNFGHSEGCSGLSSLIKSIVMLEKSMIVPNIKFETPNPKIDFQRYKLQVPQRPDPWPRN…
Aaosphaeria_arxii_CBS_175.79_CBS_175.79_GCA_010015735.1	g6469	KS-AT-DH-xCP-MT	MPFSKETQVSSVENNEHNLGGSYSDISDDSITHESWNTSDYPPHSIAVVGMAGKFPEADSVEELWDLLLDGKSVVKPAPVERLQLPQTGSYSDTKWWGNFLKDPDAFDHRFFKKPSREAVAWDPQQRILLEVLYQALESAGYFGPSSENETNDYGCYVGAVMNNYYDNLSCHPPTAYATPGTSRPFLSGVMSHHFGWTGPALTIDTACSSSLVAINTACRAIWSGECSRAIAAGTNVITSPFDYQNLNAAGFLSPTGQCKPFDAGADGYCRGEGVGVVVLKKLSDAVQENNNILGVIVGSAANQNQNFSHITVPHSGSQVELYHKAMKLGNVRPEEVSYVEAHGTGTGVGDPVEARSIRDALGGPHRDSILHFSSIKGNIGHTEASAGVSGLIKVLLMM…
Aaosphaeria_arxii_CBS_175.79_CBS_175.79_GCA_010015735.1	g2251	KS-AT-xCP-Red	MSISMLPESLNHACKANGFVFGGHIGPQTKKTLAKEARQILDGANAKWILDALASMPQYWDAMVQKIPEMTGTMDGAKLLAHLESWLRLGDQSEDQIEPDQEIPDIWIGFMMIAIQLDQYWRYLEFRFDGEAGQPIDDLQAEVVKVAGSGKIETVGFCAGMIAAVAVASSHNRQEFERFGATALRIGVMMAALVGATEEWSKSKGKGGSVSLATAWRTTKQGADMARIVSTMSPDAYISVLFDDSRATITTQERIARKLVRQLRAVGVTAIPLAFKGKLHTPGEERARHTEALIEICRSMPELQFPDAANLALPTYLDHPEGKSVSCEETNLVDKVLRSILTSQLNWSSTVSKLAANSDNVSLIAFGLDRPMGPTIVRAMGQKQVQFEEIEEQIPKRAR…
Aaosphaeria_arxii_CBS_175.79_CBS_175.79_GCA_010015735.1	g3078	SAT-KS-AT-PT-xCP	MELIYISNEFLFDELPNIYRELHQRSKSRQHPILARFLRESTVAIREEVKQLPTELRQLVPTFESILTFVEFAELRKGALGGSADGILLAVAELGTLIAYYESNPSAFGRTDTNTYLAGLGIGLLATPAISLAATVADLPVIGAQVLRQAFRLGVFVNQVSENLQHRDPNDDGPLDSWAYVLPNVAPKNVQEQLDTIQKRESTPEAAKIFISAYSATSVTISGPPARLKTLFSTIEFFRDTRSIALPVYSGLCHAAHIYNEEHVRQIVRTPSMERINAQYTPRVPVFSTSTGKPYPAKTATELFEHIIYEIMTQAIQWDKVVEAVTQRAQKNAKAGAKVVLYRSSLPTIELAGALKKISGLNVSTQELGQWLNSKDPAINKELDPSNRDTLQSKIAIVG…
Aaosphaeria_arxii_CBS_175.79_CBS_175.79_GCA_010015735.1	g4077	SAT-KS-AT-PT-xCP-xCP-Te	MNVFIFGDQTADQYPLLRKANVWKGNALLSNFLERTSVVLREEIQRLPKTQREQIPDFLRLSDLVEAYYAKGLKIPQIESSMVTIAQLAHYIGYFGENVQELPVPSNTRLLGLCTGLLAASIVASAKTLDELVPLAVEAVRISFRMGTCVGAVKDALEQPANANESWSTIIASISEKAANAAIAEFHQERRIVKSAQAYVSAVSVMAITVSGPPSTTKRLFEDSDAFSSNTRVPIPVYAPYHASHLYGEADIDRILGDEISDILCKFRPHSLIHSASTGICHTATNTLDLVKTVLAEILLEPVRWDNLLEECVSQVTAVSNNTCNITAIGVTNVANSLASALKAGGQSSVSIRDHTSWIAKTEDANGRTQNDKIAIVGMSGRFPSAASHEALWELLEKG…
Aaosphaeria_pasadenensis_FJI_L9_BK_P1_GCA_022813625.1	g1377	KS-AT-DH-ER-KR-xCP	MTTSGPLTGFPAEGLPTPQRFITTHDAEGRSVFLPTDSGDHQAIMVAGAASQSIMYSADKVPINLNEEHDVKWAKENQVIMSPSIRARGDDQEAIAIVGMGCRLPGDIVSPSTLWDFLAQEKSAQGRIPSSRFNADGFYNPDASVSGSMSVDGGYFINEDIRNFEPDFFGINNLEATYMDPQQRKLLEVVYECFENAGVTLQSASGANIGTYVGTFTMDFQLMQASEPHHFHRYSATGMGTTILANRISHVFNLTGPSYVLDTACSSSLYALHAACRALQSGDCDAAVVAGANLVQSPQQFIGTAKAGVLSKTSTCHTFDTSADGYGRADGIGALYVKRLSDAIKDGDSIRSVIRGIAVNSNGRTNGITQPSADGQAAVIRKAYSLTNLDPAMTDYIEC…
Aaosphaeria_pasadenensis_FJI_L9_BK_P1_GCA_022813625.1	g2368	KS-AT-DH-ER-KR-xCP	MEPIAVIGVGLRFPQDAVDSEAFWEMLMKKQCSTSEWPSDRLNVDAFHNPARRETSSIAARGAHFLRDDPALFDASFFSITSAEAAALDPQQCLLLETTYQAFENEAPISMTRMGFLSPEARSYSFDNRANGYTRGEGVGVVVLKRLSDAIANNDTIRAVIRATGTNQDGYTPGITVPSPISQSRLIRETYEKAKLSPGSTKYFEAHGTGTFVGDPLEAASIGSVFRTHRSESDPIYVGTLKPNIGHLEGASGVAGLIKAILVTEKGILPPNANFERLNSSIAADNLNFLKFPTSPVSFPEEGIFRASVSSFGFGGSNAHAIVDDAFGYFREHGIVAHHSSSRQSGGIFTNGIHVPFIQEKILVWSANNEKALTKMNASFAKFFQSQDKARLSEHPEED…
Aaosphaeria_pasadenensis_FJI_L9_BK_P1_GCA_022813625.1	g6010	KS-AT-DH-ER-KR-xCP	MMGSANPNDGGILRPLAVVGMSYRFPGKSTSDEAFWNMLLSKRCASTDVPPDRYNINAHYNPDPKRLDTLSCRGGHFIDGRADVFDAGFFGIGATESSSMDPLHRISLEESFRAFENAGLSLEDVAGTKTCVFSGCLSPDYVTVSHKDTYNPNQYHASGSAINMLANRVSWWFDLRGPSVTVDTACSSSLIALNLACQSIWAGDATMGLVCGANMLLTPESQLYLNNLGLLSEDSRSYSFDHRANGYGRGEGVGVIIIEPLDEAIRHGRTIRAVIRSSCSNQDGKTPGITAPSQEAQFRLINDTYLKAGLNMEHTRYFEAHGTGTPLGDPIEAGAIGQAFRPYRSSQHPLYVGSVKTNIGHLEGGSGVAGVIKAILALERGVIPPNANFERLNPDIDAD…
Aaosphaeria_pasadenensis_FJI_L9_BK_P1_GCA_022813625.1	g6043	KS-AT-DH-ER-KR-xCP	MSPSSYTTHAGDGAATTNGDHPDLNGKSSSDGLSTTANVDHMRRWNGIPARGIDDEAQSNGQPRPNGSISEPHNIAGPSTTISYEDAYTHGYKDGYTSGYQKSYVGLKHQPVAIIGMSCRLPGNVSTPDEFWELLARSRTGFSEIPPSRFSADRFFHANPGKSGTTNARGGNFLTHDLSVFDAPFFGFTQQEAVSLDPQQRLLLECTFEALESAGIPKHEVVGQNVGVFVGGTFSEYEADLFRDPNTIPMHQATGCAMAMQSNRISHFFDMRGPRESSMAVAAGVHLNMLPEFWISYSMSRLFGEAGRSFAFDDRGTGYGRGEGCGMVLLKLLDQAIKDNDPIRAVITGSGINQDGKTPGITMPNGSAQEALIRSVYKDGGMNPQDTGYVEAHGTGTRV…
Aaosphaeria_pasadenensis_FJI_L9_BK_P1_GCA_022813625.1	g1349	KS-AT-DH-MT-ER-KR-xCP	MPLIADDLSPISEDFSVFSESASFDDEDFSQENETITPIAIIGFAFRGPGDATSSEAFWDLLNEKRTAASDYPSERLNIDAFYRDGERRVGELPLKQSHFVKDDIRAFDAGFFSISPAEASAMDPMQRILLETAYQGFENAGIPLGALLGSNTSVYTGSFTTDYQAQLTKDPATIPTYAATGGSASILANRISWFFDLKGPSSIVGGCNLCFSPEYYTMLTNLKMLSDDGRCFSFDSRANGYARGEGFGTVVLKRLDDAIADGDTIRAVIRSTGCNHGGRMPGITQPSKFAQEALVRETYRKAGLSMKPTRFCETHGTGTALGDPIESMALGRAFKESRTNSDPLILGAVKSNIGHLEGASGIAGLIKTVLVLESGYIPPNANFEKLNPKIDPEYLSIK…
Aaosphaeria_pasadenensis_FJI_L9_BK_P1_GCA_022813625.1	g3847	KS-AT-DH-MT-ER-KR-xCP	MADPVAVTGFAFRFPGDAVTEEAFWDIIAKGQSTMTEVPESRYNINGFHGPKGSSRNSVSCRGGHFIKGDISAFDAPFFAMSPAEARVMDPQLRLMLETAYHALESAGLTMEKVHGTNTSVYVGNLAAEYSSLFTNDDEIHAAYQATGMSGAMLSNRISWFYDLHGPSITIDTACSSGLVGLHLACQSLLQHESEMAIEDGDTIRAIIRGTSTNQDGHTPSITQPSHLAQAALIRQAYKNANLDFDDTQYFEAHGTGTSVGDPIEAYGINEVFSRHANTGNPLFVGSVKANIGHLESAAGIAGVIKAVLSLERGMIPPNALLKNINRAIYADDWNMKTNGVRKQLIISNGVQLAENGHTENTTSNYPHLLILSAADEDGIYRLAATLEKYLSKCGNETT…
Aaosphaeria_pasadenensis_FJI_L9_BK_P1_GCA_022813625.1	g7329	KS-AT-DH-MT-ER-KR-xCP	MRGGFYLEEDPRLFDNNLFHINAIETRTMDPAQRKLLEVTYEAFENAGEPWESFAGSKTGVFVGNFMSDHQNMQFRDPDNPMPYVTTGGDIAIHSNRINYVFNLKGPSLTLDTACSSAMYALHIAVSGIRNGDCEAAIVAGSNLISDPGPQMFITKLGALSPTSISHTFDAAADGNGQSEGISYPSPAGQEAVIRQAYCNAGGLDPALTGYFEAHGTGTPVGDPIEVSAIGRVFSKYREDNNPLLIGSIKPNLGHISLHKENTSANMSSKRLVLLPFSANDDNALKKTIQAIGREAGDYDIRHLAHTLSRRRSKFSQRAFIISPSDTVPNFLQSATIASVKCQRDPATNIGFVFTGQGAQWPSMSHGLLNEYPVFQSSIRYQDQVLARLSKRPPWSIED…
Aaosphaeria_pasadenensis_FJI_L9_BK_P1_GCA_022813625.1	g7443	KS-AT-DH-MT-ER-KR-xCP	MDYVDNEEWASEPIAIIGMSCKFSGGASSPEKLWDLMACGRTGWSEIPKDRFDLKGVYHPNHERTSTSHVKGGHFLDEDVAAFDAAFFNYSAEMAQVVDPQFRLQLESTYEALENAGLPLAKVMGTQTSVFAGVFTHDYQDQIIRDEDRLPRFNVVGTWSPMSSNRISHFYDFRGASMTLETGCSTTLVALHQAIQTLRNREADMSMVTGSNVMLNPDTFKAIGSLGMLSPDGRSWAFDSRANGYGRGEGVATVIVKRLSDALAANDPIRAVIRETALNQDGKTDTITTPSGSAQVDLMRECYRRAGLDPRGTQYFEAHGTGTPTGDPIEASAMAAIFANSEGREREANYLHIGSVKTNVGHTEAASGLAAIIKGVLCLEKELLPPSVNLETPNPKLKL…
Aaosphaeria_pasadenensis_FJI_L9_BK_P1_GCA_022813625.1	g7793	KS-AT-DH-MT-ER-KR-xCP	MPEPIAVVGFAFEFPGNIRTEDAFWDMLVDRKVDAPTIPKDRFNPTAFGPVSEKDLGAWGTQGAHFLREDVGAFDAPFFSISPAEAEGMDPQQRKLLETTYHALENESVTTIGKMGFLSPDGLCHSFDERGNGYARSEGLASLVVKRVSDAIRDKDTIRCVIQATSTNQDGRTINLAQPCEAAQEELLRSTYDTFNLDRSLTRFCEAHGTGTAVGDPIEMNALSSSFDGIRNDADPLFIGATKANLGHLEAASGIAGIIKTILVLEKALIPPIAQLQRVNSRIKGHNLKFPTELTPWPCPGPRRASVQSFGFGGTNAHAILDDAANFLESRGIPYDVKPRTDSHHSSSESQLAALEESPRQLLVWSAPNKPSLERVLQSYSRCLADAVASSKFGDEVLP…
Aaosphaeria_pasadenensis_FJI_L9_BK_P1_GCA_022813625.1	g1202	KS-AT-DH-MT-KR-xCP	MFDLDDTHLPKPVAIIGTACRLPGKASSPSKLWELLLHPRDLLKEIPEDRFQWKGFYRPDSLLSTSKSNKGYFLEENIRNFDPTFFNIAPSEAENIDPQQRLLLENVYEAIESAGLTLKQLQGSDTGVFVGAMSNEYFDNANVDVDGANGTLLTTGTSRSIASNRISYVFDFKGPSMTIDTACSSSLVAVHLAVSALRQGECKVAFACGAHLNLSPNEWIALSKMNMISSDGRSKHLDATANGYGRGEGTSVVCLKLLEDAVKDGDHIECVIRQTGINQDGRTKGITMPSAEAQADLIRRTYHSVGLDPTKLDHRPSFFEAHGTGTPAGDPVEAQAVQAAFFPPGRNYNDEVLHIGSIKTIIGHTEGTAGVAGLLRASLAVSHGILPPSLHMSNLNPAV…
Aaosphaeria_pasadenensis_FJI_L9_BK_P1_GCA_022813625.1	g1433	KS-AT-DH-MT-KR-xCP	MSQTRKPIAICGLALRLPGNVNSAEKLWEALRDGRDMRGPVPKSRYNNEGFGDALGEKGAIKSQHGYFLEEDPGCFDTSMFSLTEEEAQRTDPQQRLLLEIAYECFENSGLTRYRGSTTGTYIGTFGEDWLYSQAKEDQHSGGYILGGQADLMLANRVSYEYDLHGPSMVIKTGCSATLVALHEACRALQLGDCSGALVAGSNLILGPTLTAAMASEGILSPEGSCKSFSAEADGFARGEAVVAVYITMLDRAAQENLPIRAVIANTGVNSNGRSASILQPNMNAQADLIRRVYADINLKPDRTAYVECHGTGTPTGDPIEVTAVGEVFGTQGVMIGSLKPNFGHSEGCSGLSSLIKSIVMLEKSMIVPNIKFETPNPKIDFQRYKLRVPQRPDPWPRN…
Aaosphaeria_pasadenensis_FJI_L9_BK_P1_GCA_022813625.1	g5088	KS-AT-DH-xCP-MT	MPFSKETQISSVECNEHNLGGSYSDISDDSITHESWNTSDYPPHSIAVVGMAGKFPEADSVEELWDLLLDGKSVVKPAPVERLQLPQTGSYSDTKWWGNFLKDPDAFDHRFFKKPSREAVAWDPQQRILLEVLYQALESAGYFGPSSGNETNDYGCYVGAVMNNYYDNLSCHPPTAYAMPGTSRPFLSGVMSHHFGWTGPALTIDTACSSSLVAINTACRAIWSGECSRAIAAGTNVISSPFDYQNLNAAGFLSPSGQCKPFDAGADGYCRGEGVGVVVLKKLSHAIQENNNILGVIVGSAANQNQNFSHITVPHSGSQVELYHKAMKLGNVRPEEVSYVEAHGTGTGVGDPVEARSIRDAFGGPQRDSILHLSSIKGNIGHTEASAGVSGLIKVLLMM…
Aaosphaeria_pasadenensis_FJI_L9_BK_P1_GCA_022813625.1	g7438	KS-AT-xCP-Red	MLPESLNHACKANGFVFGGHIGPQTKKTLAKEARQILDGTNAKWILDALASMPQYWDAMVQKIPEMTGTMDGAKLLAHLESWLRLGDQSEDQIEPDQEIPDIWIGFMMIAIQLDQYWRYLEFRFDGEAGQPIDDLQAEVVKVAGSGKIETVGFCAGMIAAVAVASSHNRKEFEKFGATALRIGVMMAALVGATEEWSKSKGKGGSVSLATAWRTAKQGADMARIVSTMSPDAYISVLFDDSRATITTQERIARKLVRQLRAVGVTAIPLAFKGKLHTPGEERARHTEALIEICRSMPELQFPDAAHLALPTYLDHPEGKSVSSEETNLVDKVLRSILTSQLNWSSTVSKLAANSDNVSLIAFGLDRPMGPTIVRAMGQKQVQFEEIEEQIPKRARLPPT…
Aaosphaeria_pasadenensis_FJI_L9_BK_P1_GCA_022813625.1	g1604	SAT-KS-AT-PT-xCP	MELIYISNEFLFDELPNIYRELHQRSKSRQHPILARFLRESTVAIREEVKQLPTELRQLVPTFESILTFVEFAELRKGALGGSADGILLAVAELGTLIAYYESNPSAFGRTDTNTYLAGLGIGLLATPAISLAATVADLPVIGAQVLRQAFRLGVFVNQVSENLQHRDPNDDGPLDSWAYVLPNVAPKHVQEQLDTIQKRESTPEAAKIFISAYSATSVTISGPPARLKTLFSTIEFFRDTRSIALPVYSGLCHAAHIYNEEHVRQIVRTPSMERINAQYTPRVPVFSTSTGKPYPAKTATELFEHIIYEIMTQAIQWDKVVEAVTQRAQKNAKAGAKVVLYRSSLPTIELAGALKKISGLNVSTQELGQWLNSKDPAINKELDPSNRDTLQSKIAIVG…
Aaosphaeria_pasadenensis_FJI_L9_BK_P1_GCA_022813625.1	g5423	SAT-KS-AT-PT-xCP-xCP-Te	MNVFIFGDQTADQYPLLRKANVWKGNALLSNFLERTSVVLREEIQRLPKTQREQIPDFLRLSDLVEAYYAKGLKIPQIESSMVTIAQLAHYIGYFGENVQELPVPSNTRLLGLCTGLLAASIVASAKTLDELVPLAVEAVRISFRMGTCVGAVKDSLEQPANANESWSTIIASISEKAANAAIAEFHQERRIVKSAQAYVSAVSVMAITVSGPPSTTKRLFEDSDAFSSNTRVPIPVYAPYHASHLYGEADIDRILGDEISDILCNFRPHSLIHSASTGICHTATNTLDLVKTVLAEILLEPVRWDNLLEECVSQVTAVSNNTCNITAIGVTNVANSLASALKAGGQSSVSIRDHTAWIAKTEDANGRTQNDKIAIVGMSGRFPSAASHEALWELLEKG…
Acarospora_socialis_JNA_AS_CCGP158_GCA_025617375.2	g3786	KS-AT-DH-ER-KR-xCP-C-A-xCP-Red	MAPVQSKLRPNVARSGQDPSAIVGLACRVPGANSPSKLWNLLEEQRDVQKKMPVERFNVDAFYHPDGANKGTMNAKYGYFLDQDITGITLEEINGSQTSVFCGCFTNDYNAMVTKDLEYYPKYTVTGTGNSILANRISYFYNLHGASATIDTACSSSLVGLHMGNQTLKTHESDLSIVVGSALHFDPNIFITMTDLGMLSTDGRCRAFDAAGRGYVRGEGICAAVLKRSADAHTDGNVIRAIVRGTHVNHDGTKQGITMPNPQAHEALIRRAYADAGLDPADTQYFEAHGTGTPAGDPRETRAIGAVFSPNRTQPLVVGSVKTNIGHLEGASGLAALIKATLSLERGKIPANMHFNNPNPSIAFDDWKIKVPTKMMDWPTTTGPKRASVNSFGYGGTNA…
Acarospora_socialis_JNA_AS_CCGP158_GCA_025617375.2	g3215	KS-AT-DH-MT-ER-KR-xCP	MSAMNSSVPIAIIGMSCRFAGDVNDPEQLWHMCADGRSGWSEIPSSRFNMDAFYHPNTEKLSTSLDPQFRLQLESTYEALESAGISLQEAAGSNTSLFGGTFFGDYQDANLRDPETLPRFLLVGTGSAMASNRLSHFYDLRGATGESDMSIVGGANVMLNPDNFVSMSSLGLISAAGKSYAFDSRASGYGRGEGSATVVLKRLDDALRDGDPIRSVIRGTGLNQDGKTDTITTPSQKAQEELIRTVYRTSGLDPSQTTYFEAHGTEQPLRIGSVKTNVGHTETTSGLASIIKVAMALEKGQIPPSINFEKPNKNIHLDEWNLKASCCHTSANVSGLVKAIESGKMKPTRKSDRPKLGFVFNGQGAQWYAMGRELIETYPVFKQCLLKADGYLKEFGSTW…
Acarospora_socialis_JNA_AS_CCGP158_GCA_025617375.2	g5064	KS-AT-DH-MT-KR-xCP-C	MASITNLQAQAEPIAVVGSGCRFPGGANTPSKLWELLKHPRDLLTKVPKDRFNVDAFYHPDGTHHGCTNTQHCYFLEENTHAFDASFFNIRPHEADCIDPQHRLLLETVYEGLCAAGLKVEDLQGSSTAVYVGLMTNDYANIVQHDLGAIPTYAATGTSACILSNRVSYFFDWHGPSEGVATVVLKTLGQALKDGDHIECIIRETGVNQDGRSPGITMPNHAAQEILIRETYARAGLDLNKESDRCQYFEAHGTGTPAGDPQEAEAISTAFFGHRERSNDEDPLYVGSVKTVIGHTEGTAGIAGLLKASLAVQNATIPPNLLFDNLSPRVAPFYKNLRIVTKAKAWPQVLGGAPRRASVNSFGFGGTNAHVIVESYHSAEEKALHASTQDLVWTMLQKR…
Acarospora_socialis_JNA_AS_CCGP158_GCA_025617375.2	g4969	KS-AT-DH-xCP-MT	MKIFTISNTNFFRLVHGERMKDGWHETVNGNNLILFLNRAQELRLTLFGPQVTHWTQESLSGLKSALLQNTNLEFLNKTLLRLPSLWSALERDGVVSDFGGEVKLKELEDFAAGRSIPDPQKLSNTHLAPLTVVSQVVDFVRIADGPGRNDSLLECQAAQGFCTGFLSAAALASSSNWTEFERNVSNTLRLAACIGIVIDAEDALHAPPDRATAVSVRWQTASDRAYLETFLDLFPDAYVSCITDDKTLTVTLPNRNQTSFCSRLSEVKIATTIIGLDGCYHHSRHTKAAQTLKRLCAGNNELELPNADKLRLPLRSTADADIIATGALHEVAIELILCKRAHWFQTVKLTVADIPHGKVKFVPLGKEFCVPRSLLPGKLSFTNGIAHHDNAPDLAGRT…
Acarospora_socialis_JNA_AS_CCGP158_GCA_025617375.2	g3206	KS-AT-DH-xCP-xCP-MT	MSALGTDGILPEDMPPNAIAVVGMGCKFPGADSVEQFWRILDAGQSMLSEPPSGRFPTHDHQRNTEKTVYFGNFLDDIASFDHRFFKKSSREAASMDPQQRLLLEVSYQALESSGFFGPREPDLDVGCFIGVAASDYNDNVAKGVGLVVLKRLSQAVTDGDTVLGTILATSVRQSSNKVPITVPYSSSQTALYRKLLSTAGIAAEDVTYVEAHGTGTPVGDPREYEAIKEVFGSKSRREPLHLASVKGNIGHTEGASGVAGLIKTILMMQNRAIPRQANYVSVHPKITLIPGQLSIPTETLPWTTNTLVACVNNYGAAGSIAAMVVKEAPPKKGQGQSQGQTQSLQTTRAQWLSKCPLILTANSAKSLAENCAKLRDYVSSFHRDPASVANMLADLTFN…
Acarospora_socialis_JNA_AS_CCGP158_GCA_025617375.2	g304	KS-AT-PT-xCP-xCP-Te	MELYIFGDQTADCRQFLRKVLLRKGNVLLTSFLESAANALREEISQLTNVQYRRHFPNFSNVQELVERYYEEGKPNPAIESAIVCLSQLAHFIGYFEGRPKSYLASPSTSHPDTRLLGLCAHVAAVSERLESRLDGQDSWSTILAGVDAQSAEEILEKFHARHWNNVLERIVPDVLASPNRGCKVHAIGPTNITSSLVSALKTAGAGQVSTEDLNSWLSQPPVISPSMAKMADSNIAIVGMAGRFPDAADHELLWALLEQGLDVHREIPKDRFNVETHVDPTSKVKNTSHTPYGCFVENPGLFDARFFNMSPREAAQTDPMQRLMLTTAYEAMEMAGIVPNRTPSTKADRIGTFYGQTSDDWREINAAQDIDTYFISGGVRAFGAGRINYFFKFSGPSF…
Acarospora_socialis_JNA_AS_CCGP158_GCA_025617375.2	g486	KS-AT-PT-xCP-xCP-Te	MASGVERRLTPIAIQPPRPTGKFEDSKIAIIGFSGRFPEAASNEEFWELLRAGRDVHRTIPKDRFDWEAHFDPTGKKKNTSRVKYGCFINEPGLFDARFFNLSPREAENTDPAQRLALMATYEALEMAGLVPNRTPSTQQDRIGVFFGVTSDDWREVNSGQNVDTYFIPGGNRAFVPGRISYYFRFSGPSLSIDTACSSSFAAIQTACTQLWRGDCDTAVAGGTNVLTNPDNFAGLDRGNCNAFDDGASGYCRADAVGAVILKRLEDAEADNDPIFGVIAGSNTNHSGQTESITRPHEGDQASVFKRIIRYANVDPKQVSYVEMHGTGTQAGDATEMKSVLSVFVPGQERMPRHPLHLGSVKANIGHGESASGVASLIKVLMMMQHDEIPPHCGIKTKI…
Acarospora_socialis_JNA_AS_CCGP158_GCA_025617375.2	g5694	SAT-KS-AT-DH-xCP-MT	MSSLATDSPPSLLVFGPQTEFPPEKVLQDCRQELISSPRLSALEEAVDDLPQFWQGLVDFDPSLRQVPGAKYLGHLKQWVKDGGPFPHQQSNSPNHYALAVTVLLQITQYTRYLDQLGKDSHRKVLNSVKAGGGVQGFCVGFLSAVAVASSGSEVDLGASAAIALRLAVCIGAYVDQDGAYAPVATEYMAVAIRWREGNADDKAEVAKIIRSIPNVYISSVNDDASVTVTIRAADLDGLTAKAREKNLHTKAVHVYGRFHTPNHSRAVDKLTKMALLSKGLQFPDTKELQVPICGTADGEIISGGSLTQLALENTLVNVADWYATLRSSIQQLPKSNQTIAIAGFGNLEGSKPKLGEGLTDGHVNGHVNGINGVHRIDNSNDLSQYPSHSIAIVGMAGR…
Acarospora_socialis_JNA_AS_CCGP158_GCA_025617375.2	g1647	SAT-KS-AT-DH-xCP-xCP	MPPPPSLVAFGSLTLWPTADQLQQLSKALRQQPDLSQLVTAIRDLASLWKALLDKDPDLDKVPGQVATEQLARWVDTGDVAKIDDPQPNIMTMPMTIIAHIVQYLGYLQQPGETISHLEVLESVTANGGVQGFCAGMLTALAVASARDEGEIGLAAATSIRLALCIGAYIDLDGRRDQGTLEASSLAIRWKSPASLETVQQVLENHPHILEACGLYSDTHFGHKSLVRSNTDGQVIPEDDAALVALRCIMVDRANWYLTISSAASSMRQTHGHPFIMSFGADSIPPSISKTVKVVKAPTTIVHFSSTTLSELNAPQLEIKLPSTLRYPENAIAVIGMSCKFPGADSLDEFWQLLADGTSMLEEMPKQRFSSTGRYRSPGVKLRFWGNFVRDIDAFDHRF…
Acarospora_socialis_JNA_AS_CCGP158_GCA_025617375.2	g370	SAT-KS-AT-PT-xCP	MVNDLNTKLVFFSNEFPNDDLQELFRRLQRHSKDKKFRYLAAFLEECTAVVKDEALKLPQQLQDLIPHFNTVLTLADHGDFRQGPLGAAMESAILCVLEIGMLIGHYEGQNLEYDLPTGSTTLAGLSIGLLSGAAVALATSLADLAHTGAESVRIAFRLGVYVDEISRKLEPREADANLESWAYVVAEMSAEDVQKEIDRYNADTSNPELTKVFISAADKSSVSVSGPPSRLKKAFQHSQVLRYSKFLPLPVYDGLCHAPHLYSVDDINFVINGSEPKVSRSRRVQLPLLSSQTGTPFPAKRAGDLFEQIATELLTGTIYLDNVTAGILTNLADSGMPECQVGLFRMSLVTKGLLSSIESDFPQLKLTRHDLIDWVTKDFGTRIPRSPKQSKLAVVGMA…
Acarospora_socialis_JNA_AS_CCGP158_GCA_025617375.2	g6262	SAT-KS-AT-PT-xCP-xCP-Te	MTMASPSHALLFPHEHTDVLGALHDLSVRSKTRPQLRAFLASSSAVVHEQAVAVDGPERASIGSFEDLVELAQRHVSRQRHNVVVEMVLLTTIQISQLLVLAEDDPSILSDTSVPVGFGIGLIAAAVAATASNANSVAKLGLEGVAVAFRLAVESQRASRDIEESDGTWARVVSSCKLEEVQQRLDKANVTLRPLYQAYVGQVLPGSLVVFGPPSTLDTLAKMSDLARSITSTPTPSKCLMYGSHLPPVDTAKILCVSPVREACTVQRSLYSVHSPAGSLSAGTFGELLRLTVSEIAHKSMQVEETFRTVATALQKTGSSEVVLMTVGSTWDASPLQDIFHQHDQNVRIGEFSPCPKPFGDDLSSIPSDAIAVVGMSGRFPESDTLDELWRLLETGTTT…
Acidomyces_sp._richmondensis_FRIK2901_GCA_003545705.1	g3026	SAT-KS-AT-PT-xCP-xCP	MSNVLLFGDQTAEQYPLLHKIVLRKENALVRSFVEQVSRALREETRLLPRSQRDQIPDFLTVNDLKEAYYQKGTKVPMLESALVTITQLGHYIGYFSEHPNELPAASNTRVLGLCTGLLAAAAVVSARTVEELVPLGVQFVRLAFRSGAVVDSVRTALSQVGEEKAPWSTIVTGTTEQVAKEALAAFHKEKGIPQSSQAYISAVSVMAITVSGPPTTVKRFFEESPVLSKNHRVPIPVYGPYHAEHLYGPADFDKMLSGTVSEQLRKYQPASLVHSAYSGKPIVADNALDLAKVALSEMLQLPVRWDYLLEETVSQMTANKFPSKIYAMGVSNVANSLISALKAGGKTDVTAVDQSAWEEAQEFTKGRTQNDKIAIIGMAGRFPNAANHEALWDLLMKG…
Agaricus_bisporus_A10_9_GCA_041430195.1	g687	A-Red-KS-AT-DH-xCP	MTANGINGHGANGVNGTNGTNGHHETNGVNGSHIVPFVKPKVNFASAERLEGCIHSLPELVDFNSLNNSNHTFCVQAKSNEPFDTITHGEFKVAVSKCVAWLKENLPIRPTNDEKALTKMAPVALFMESDIGLVIHEFALMSIGVPPLVLSPRLPPVAISALLEATAASSFIVSPRMSEPLKGALAALAAKGISTHIGNPYKAYYQPGADPTSVPAFEIPQNPEDVILLLHSSGTTGLPKPIPTTHRQLLFAVNCHKFDTEEQAQSLNLSTLPLFHGFGLVAPGLSMSAGKPTLYPASDGIPNAKSIVDLVNKTNAKSMMTVPFLLDDITNLPNDEGIKALVHMDFVGTGGAALGAGIGDRLAKGGVKLLNFYGTTETGPLSLTFAPTDNYDWKYFRLR…
Agaricus_bisporus_A10_9_GCA_041430195.1	g7241	Atg_2-KS-AT-DH-MT-ER-KR-xCP	MVLAMAKKPMTSSSFVEEWAKGQHIQPGSKKSTSVFYRNLEEELDAVRAQHSFATLHTRPDDLIDFSSCDVLGLGRSNAIRDAFVEEFARHPELTVGAHAGRLLDGNTAYMETVEHEIAALHGAETALIVTSSAIGNDAIFQAVPLAGDAIVYDELMHASALDGFKHSVSLCQRSFRHNNVDSFMETLMAVRDSQPQIRNGTRCVLVALESVYSMDGDICPLREFVDAAKEVFPDGNCQFMVDEAHSSGNIGPNGAGLVSVIMCNQTIRDVLLNYGRQIQFSNAPSATVVATARAGYEMLASGKTAMAQKRVQRAVKLFMEAMTEHPIWDTANDAGVIRIPLYEEIDWEGQPYLSPICPVWTRPKHNIWLSLHLQAAGYGVYPILYPIVPKGTDRVRVI…
Agaricus_bisporus_A10_9_GCA_041430195.1	g5897	KS-AT-DH-ER-KR-xCP	MEDIAIVGIGLRFPGDAKSPEELWKVMERGESQWSEFPKDRLNIDGYYHPGGDRLGSVGAHFLKEDVATFDAPFFGVSADEASAVDPQQRILLEASYEAIENAGIRKEDVEGSDTAVYVGSFVKDYEQICLRDPDWQPQYAATGNGVAIMANRISYAFDFHGPSMTIDTGCSGSLVTVHMAAQSLRTGETSMALAAGAGMILTPNTIMPMTALNFLGPDGKCFTFDARANGYGRGEGIGVVVMKRLSDAIRDNDTIRAVIRGTRVNQDGRTTGITLPSKEAQVANIRGLYKSTGLDYNQTAFVECHGTGTQAGDWRELKAISETIGSERDVENPVVVGSIKPNIGHLEGAAGVAGLIKGVIVLERGKIPPNINFETPNPDIDFENWKVKVPQKLLEWPL…
Agaricus_bisporus_A10_9_GCA_041430195.1	g5671	KS-AT-DH-MT-ER-KR-xCP	MELRQMRNPAAHGDGVEPIAVIGFSMRFPDEATSPEGLWNILREGRNVMTEVPPERFNIDGFYHPDAMRPDTVNARGGHFLKEDIAAFDAPFFSMNPSEVESMDPQQRILLETSYHAFENDEEIQPIYKATGNAGSILANRVSWFYDLRGPSVTVETACSSSMVALHLACQSLRTGESKMGLVAGSQLYLEPLTSAISLSSLKFMSSDSRCLSFDDKGSGYAKGEGFGALILKPLKDAVADGDSIRAVIRSTATNQDGRTPGITQPSLAAQEDQIREAYKVGGLDFDSTRLFEAHGTGTALGDPIEAEAIRNVFQKYRSPDDPIIKADEWHLRFPTEPVPWPCNGLRRASVNSFGYGGSNAHVVLDDAYNCLREQNLQGNHFTINAPPENIGLSEEGLL…
Agaricus_bisporus_A10_9_GCA_041430195.1	g7959	KS-AT-DH-MT-ER-KR-xCP	MGSSDEPMPVCIVGLGCRLPGGSSSGEKFWELLMNKKSARSETPSDRWNVDSFYHPNGEKSGSMNVRAGHFIQEDMAAFDARFFSISPTEAMSMDPMQRMLLEVVYEATENAGIPLSKLAGTNTGCYVGCFSNDYDQIAKKDAETLPKYHSVGTGQSILSNRISFCFNLQGPSLTVDTACSSSLVALHMACQGLQSGETKAAIVGATQATLFPDMMVGMTNMHFLSPDGICYSFDSRANGYARGEGMAALVLKPLADAIQDGDTIRAVIRGTAVNSNGKNTGITLPMRDAQARLIRTAYKQAGCDLRSTGYIEAHGTGTPAGDPIEANAIGETLGSARAEGDGELYVGSVKSNIGHLEGASGLAGMIKTILSLEKGVIAPNVWFEEGNKDIDFDKLRLR…
Agaricus_bisporus_A10_9_GCA_041430195.1	g914	KS-AT-DH-MT-ER-KR-xCP	MTVHISDDIAVVGVAYRLPQDVEDDASFWEVLQGSRNLSSGWPEQRMNADAHPHPRNGNSHKNGGHFIRQDPASFDAPLFGLTAKEAASMDPVQRWTLEVAYRSFENAGIPFESLKGSRTAVLSATFTEDYIRMAAMDPDNVERTAATGCLASVIPNRVSYFFGLHGPSIHVDTACSSGLSAFDMACKVLGSGDADSALVTAANLILEPGMYQMFRNLQMLSPDNTCKAFDHKANGFGRGEGVLGFVLKPVSKALQDGDVIRAVVRAVSSNQDGHTPALSQPNPVAQEELIRHVYGRAGLALDKTRYVEAHGTGTPVGDPIEMRAIGGAFRESRSVKEPLYVGSVKSNLGHLEGASGLAGILKAILILEKGIIPPNALFEKLNPDIDAEYLRVEVLNRC…
Agaricus_bisporus_A10_9_GCA_041430195.1	g9388	KS-AT-DH-MT-ER-KR-xCP	MGSLGPSRAVNGTATTHESSSVVADGVNLEPIAVVGMSCRLPGSASDTQKLWELLKQGRSAWSKTPKERFNQEGFHDSSSDVKAGTTNTDGGHFLQNDVKAFDASFFGINPVEATAMDPQQRLVLEIAYEAFENAGLTIEQLSGSNTGVYVGLWASDYQEILVRDTDFSPTYQVTGVGAAIASNRVSYCFNLKGPSFTLDTGCSASLVALHQAVQSLRAGETDKCFVAGVNLLLDPQRYAYQSRLKMFSNFGKSYSFDHRASEASGYGRGEGCSGVVLMPLSQAKKQGYPIRAVIRNSVVNQDGRTQGISVPSASAQSAAIERAYSQIGLKPYADYVEAHGTGTKVGDPIEAKAIAKILGATREPGSPLPIGSLKANIGHLESAAGLTGLLKAVLMLEH…
Agaricus_bisporus_A10_9_GCA_041430195.1	g691	KS-AT-DH-MT-KR-xCP-C-A-xCP-Red	MSPTILSSEQQFREPIAVVGTACRFPGSANSPSKLWELLRQPRDVVKEFDAERLNLNRFHHKSGDTHGATDVANKSYLLAEDSRLFDASFFGISPLEAAGMDPQQRLLLETVYEVFESAGVTLEQLSGSLTSVHVGCMTSDYANIQARDTETVAKYNATGSANSIMSNRISYVFDLKGPSETLDTACSSSLVALHNAALGLLNGDCNTAVVCGVNLILDPAPYINESKLHMLSPDSRSRMWDKAANGYARGEGTGAVLLKTLSQAIKDGDHIEGLIRSTGVNSDGQSPGITMPYAPTQAALIRKTYARAGLDIAKDRPQYFECHGTGTKAGDPVEARAITEAFSGSGISPENPLYVGSIKTVIGHLEGGAGLAGLIKVLLAIKHRVIPPNLLFNELNPE…
Agaricus_bisporus_A10_9_GCA_041430195.1	g993	KS-AT-DH-MT-KR-xCP-C-A-xCP-Red	MRMNATSEPEPIAIVGSGCRFPGRATSPSKLWDLLANPRDTLVPIPTDRFSTQGFYHDNGQYHGHCNVKDAYLLEGKGVQRKFDAPFFGINPSEASTLDPQIRLLLETVYEALETSGHTIEGLQGSNTAMYTGLMLEDYERVMIRDEEYMGTYHITACSSSLIAVHQAVQQLRSGQSRVAIAAGANLFLDPQLFLSASKLGMLSPDGRSRMWDTDANGYARGEGIAAVVLKPLSLAEADGDSIECVIRETGTNQDGKTPGLTMPSAKAQEKLMRECYARAGLDPTNPLDRPQYFEAHGTGTPAGDPIEAEAISSVFFPDSAAASEDSEPLSLLRQSFGPPSEIGAARITFLPFIFSAVSETSLTTYLKEFCEYLRDHYVTLNLQQIAHTLYSRRSRFPL…
Agaricus_bisporus_A7_31_GCA_037953735.1	g4636	KS-AT-DH-MT-KR-xCP-xCP	MMFAIVGVAAQLPSGRFSTTDLDYEEFGKFLFGGEHAFEDFDRLELEPNPFATVDLSNMPRKGAFLKSMTEFDYSSFGISSDDARVMPNSARRLMELSFRALLDAGIQSRGQSIGCFMSGNNDLGLDNMNTDGSLVYVPSAIPNRISYALNLTGPSIAIDTACSSSLTGLHLATSAIKTGDCTAALVGAAQSNRDVVEWWRYDKAHVLSPEGICKPFDEQADGFARGEGAVVVVVKSLQDALDDNDHIYCTIAASSHAATGSDFPVYVPHGPSQQQVISQAYKKAGREPTEADYVELHMTGTRIGDPIEANATGQVFCQNGSRIRVGSVKGNVGHLEGAAFLASLVKVCHIFDKGIIPPTPNFSVPNRGISWDKFELEVVTKPVTLGCKAEGRRPLISI…
Agaricus_bisporus_A7_31_GCA_037953735.1	g2023	KS-AT-PT-xCP-xCP-xCP	MDKNIRLLNIGPGTGLTRNLGKSFSREHVSFLDLATEKLTRAKQNPIAIVGMGVHMPGARTAEELWHILEDGINTISEVPEHRFKVSDYNNPTDPKTRRQMKASTGNFIDGVDEFDNKFFKISPREARSMDPQQRILLQVAYEALESAGYVPDSTPTWQKDGIGCYIGVATHDYGQNLRDEIDVYYSTGTLKAFLSGRISYALQLSGPSVVVDTACSSSAVAVYHGCRALMNGDCSAAIVGGVNVISSPDMMLGLDRAHFLSPTGQCKAFDASADGYSRSEGCGVFVLKKLSDAIEEHDNILGVIRGIEVNQSGLANSITHPHAPTQAALFRTLLENTGIEANRVSFVEAHGTGTQAGDSNELQSIRSVFAIKREQGNPLHIGSFKASIGHLEAASGSA…
Agaricus_bisporus_AB58_GCA_008271545.1	g4209	KS-AT-DH-MT-KR-xCP-xCP	MMFAIVGVAAQLPSGRFSTTDLDYEEFGKFLFGGEHAFEDFDRLELEPNPFATVDLSNMPRKGAFLKSMTEFDYSSFGISSDDARVMPNSARRLMELSFRALLDAGIQSRGQSIGCFMSGNNDLGLDNMNTDGSLVYVPSAIPNRISYALNLTGPSIAIDTACSSSLTGLHLATSAIKTGDCTAALVGAAQSNRDVVEWWRYDKAHVLSPEGICKPFDEQADGFARGEGAVVVVVKSLQDALDDNDHIYCTIAASSHAATGSDFPVYVPHGPSQQQVISQAYKKAGREPTEADYVELHMTGTRIGDPIEANATGQVFCQNGSRIRVGSVKGNVGHLEGAAFLASLVKVCHIFDKGIIPPTPNFSVPNRGISWDKFELEVVTKPVTLGCKAEGRRPLISI…
Agaricus_bisporus_AB58_GCA_008271545.1	g991	SAT-KS-AT-PT-xCP-xCP-xCP	MSAATFLNIPIFAGQGAAAADYPAFRKQAQRDATSSAGSLLLTACFEAFHAELSCLAQDEILRTGIDLSDFKHRNAILDIPPDCYLSNPILTGTTLFLFQSLRYLAYIETSGGVEETLAPFSDILKGNREYQLGVLGFSSGILPAVVVATSFNAISYISRSVEAYRLAFWIGVRVQQFREKIALHNPDSPWSLVFSGLDKKSAEEAIIAFDSDFPLSVTAVLDGRSVTMSGRPDILEAFSRTTPSSVAIHKTTVNCLYHFHLHSATLQQLLCDVVTRGIAFPNYADIRVPVRSTLTGLALSSINAGSLIEAVIEMIITQPVNWDLVVEKVVKAAPMDKNIRLLNVGPGTGLTRNLGKSFSREHVSFLDLTTGNFTRAKQIPIAIVGMGVHMPGARSAEE…
Agaricus_bitorquis_BH01_GCA_030246685.1	g4895	KS-AT-DH-MT-KR-xCP	MMFAIVGIAAQLPSGRFATADLDYEEFGKFLLGGEHAFEDFDQLELEPNPFATVDLSNMPRKGAFLKSMTDARRLMELSFRALLDAGIQTRGQSIGCFMSGNNDLGLDNMNTDGSLVYVPSAIPNRISYALNLTGPSIAIDTACSSSLTGLHLATSAIKNGDCTAALVGAAQSNRDVVEWWRYDKAHILSPEGISKPFDEQADGFARGEGAIVVVVKSLQDALDDNDHIYCTIAASSHAATGSDFPVYVPHGPSQQQVISQVYKKAGRDPTEADYVELHMTGTRIGDPIEANATGQVFCQNGSSIRVGSVKGNVGHLEGAAFLASLAKVCHIFDKGIIPPTPNFFVPNRAICWDKFELEVVTKPVALGCKAEGRRPLISIASAGIGGSHGHVLLEGPPP…
Agaricus_bitorquis_BH01_GCA_030246685.1	g3005	SAT-KS-AT-PT-xCP-xCP-xCP	MSAATFLNIPIFAGQGAAAADYPAFRKQAQRDATSSAGSLLLTACFEAFHAELSCLAQDERLRTDIDVSDFKHRNALLDIPPDCYLSNPILTGTTLFLFQSLRYLAYIETFGGVEETLTSFSDALKGNREYQLGVLGFSSGILPAVVVATSFNTISYVGRSVETYRLAFWIGVRVQQFREKIALHNPDSPWSLVLSGLDKKSAEEAIVAFNSDLPLGVTAVLDGRSVTISGCPDVLEAFSRTIPSSVAIHKTTVNCLYHFHLHSATLQQLLGDVVTRGIVFPNYADIRVPVRSTLTGLALSSKNAGSLIEAVIEMIIVQPINWDLVVEEVVKAAPMDKKIRLLNVGPGTGLARNLGKSFSRKDVSFLDLTTGKLTRAKQNPIAIVGMGIHMPGARSAEE…
Agaricus_sinodeliciosus_ZRL20160001_S65_GCA_022315185.1	g4875	KS-AT-DH-MT-KR-xCP	MMFAIVGIAAQLPSGRFATADLDYEEFGKFLLGGEHAFEDFDQLELEPNPFATVDLSNMPRKGAFLKSMTDARRLMELSFRALLDAGIQTRGQSIGCFMSGNNDLGLDNMNTDGSLVYVPSAIPNRISYALNLTGPSIAIDTACSSSLTGLHLATSAIKNGDCTAALVGAAQSNREFARGEGAIVVVVKSLQDALDDNDHIYCTIAASSHAATGSDFPVYVPHGPSQQQVISQVYKKAGRDPTEADYVELHMTGTRIGDPIEANATGQVFCQNGSSIRVGSVKGNVGHLEGAAFLASLAKVCHIFDKGIIPPTPNFFVPNRAICWDKFELEVVTKPVALGCKAEGRRPLISIASAGIGGSHGHVLLEGPPPKATSPHLHHETNVLFLIGGLTPSATQTV…
Agaricus_sinodeliciosus_ZRL20160001_S65_GCA_022315185.1	g2414	SAT-KS-AT-PT-xCP-xCP-xCP	MSAATFLNIPIFAGQGAAAADYPAFRKQAQRDATSSAGSLLLTACFEAFHAELSCLAQDERLRTGIDVSDFKHRNALLDIPPDCYLSNPILTGTTLFLFQSLRYLAYIETFGGVEETLTSFSDALKGNREYQLGVLGFSSGILPAVVVATSFNTISYVGRSVETYRLAFWIGVRVQQFREKIALHNPDSPWSLVLSGLDKKSAEEAIVAFNSDLPLGVTAVLDGRSVTISGCPDVLEAFSRTIPSSVAIHKTTVNCLYHFHLHSATLQQLLGDVVTRGIVFPNYADIRVPVRSTLTGLALNSKNAGSLIEAVIEMIIVQPINWDLVVEEVVKAAPMDKKIRLLNVGPGTGLARNLGKSFSRKDVSFLDLTTGKLTRAKQNPIAIVGMGIHMPGARSAEE…
Akanthomyces_lecanii_RCEF_1005_RCEF_1005_GCA_001636795.1	g1525	KS-AT-DH-ER-KR-xCP	MSSPEPIAIIGFSCRLPGGNSNPRKLWDFLERGGIASNKVPKNRFNIDAHWDGSHKPRTMRPLGGMFLEDHDPADFDASFFEISKTDAIAMDPNQRQMLEVVFEGLENAGVPLEKLDGAPVGCFVGSFASDYGDMQGRDPDDRPANITVGVGRAILANRLSHFLNIKGPSMTIDTACSGSLAGLDVACRYLKTGEIDAAIIAASNLYLNPEHVMDIGAVGNAHSPTGLCHTFDISADGYVKAEAVSSIIIKRLSDAIRDGDPVRAVIRGSSTNSDGRTPGIASPSAEAQAVAIRAAYANAGITNLNDTAYLECHGTGTQASRIKSNLGHAEPAAGNSGLIKAVLAIENGRIPGNPTFENPSPKIDFAGWKVQASRYTIPWPNAALRRASVNSFGYGGSN…
Akanthomyces_lecanii_RCEF_1005_RCEF_1005_GCA_001636795.1	g5346	KS-AT-DH-ER-KR-xCP	MATPTPLAIVGMACRTSGDVRTVDEFWTMLSRSRHGSGPIPKNRYNAEAYYHPNPQKKGTFNQVGGYFIDRDFSVFDAPFFNITKQEASSMDINQRQLLECTYEALENAGLPKGKISGEKMGVFIGTKRADYRTGSLQDLNQVEMFEATSGHSSIQAGRISYYFNLNGPSFSVDTACSSSLHAMHAAVQSIRSGDCSSAIVAASNLYMNPDDLIQMSMLGLFTPTGKTYAFDHRGKSGFACGEGVGCIVIKPLDQALRDNDKIRSIIVNTGINQDGKTVGLTSPSAKQQENLMREVYARANISPTDVGFVEAHGTGTKVGDPLEATAIHNFFGEGRTKRAPLYLGSVKTNIGHLENASGLLSVIKSTLMLERSFILPNTNFEKANPAIPLDEWNIKVPT…
Akanthomyces_lecanii_RCEF_1005_RCEF_1005_GCA_001636795.1	g2909	KS-AT-DH-ER-KR-xCP-C-A-xCP-Red	MLGYYLDQPLDQFDAAFFNISGKEAEAMDPQQRLLLEVVYEALENAGVTLEEIRGTNTAVYAGSFTYDYQSMTNRDLAQYPKYTVTGTDANAILANRISYVFDLHGPSVQVDTACSSSLTAFHLGVQSLQTGESDMAIVCGTALHFDPTIFITMAEFGMLSTDGRCRHFDASGSGYVRGDGVCAVVLKRQRAAELNGDRIRAVIRGTGTNHDGVKEGMTLPNNKAQAHLVRNIYKNAGLDPRDTGYFEAHGTGTQAGDPREALSIGEVFAAGREDPLYVGSIKTNIGHLEGASGLAGVMKAMLSVERGKILPNMHFNTPNPKIDFEALKIQVPKETIEWNPENGIRRASINSFGFGGANSHVVLENYAETQQSVLDNKIAGVVPKRPFILPLSSHSENG…
Akanthomyces_lecanii_RCEF_1005_RCEF_1005_GCA_001636795.1	g662	KS-AT-DH-KR-xCP-C-A-xCP-Red	MSSHQNEPIAIIGNACRFPGDSTSPSKLWDLLKQPREVSRNIDRFQSAGFYNKDGHYHGASNVQHSYLLNEDPRLFDAQFFNIPPGEAESIDPQQRMILETVYDAVETSGLVLENLRGTNTAVYVGVMCDDYGNICYVDQESIPTYAATGTARSILSNRVSFIFDWRGPSMTIDTACSSSLVALHQGVQVLRSGNAPVAVAAGANLIFSPNMFIAESNLNMLSPTGHSQMWDANADGYARGEGIAAVVMKRLSDAIRDGDNIECIIRETGVNQDGHTPGITMPSQEAQTRLIHETYARAGLDLSKPEDRPQYFEAHGTGTKAGDGVESKAIYKAFFPESDDEHDTLWVGSIKTIIGHTEGTAGIAGIMKASLAIQNKTIPPNMHFNTLNPEIKPYYGKL…
Akanthomyces_lecanii_RCEF_1005_RCEF_1005_GCA_001636795.1	g4186	KS-AT-DH-MT-ER-KR-xCP	MTSGDIAIVGMACRFAGDAKSPEEFHEMLQKGKDAWSKIPPGRFKAENFNHPSNDLSGTMVCEGGYYLEQDVSQWDAPFFTCSASEARSYDPQQRLLLEAAYESLENAGIPIESIANTDAACFVGAFSEDYKSIVSRDIHAAPKYAKTGTALSILSNRISWFYNLRGPSVTCDTACSSSMAALHLACETIRSDTNPTRCALVGGANLILDPDDQCGLNALGFFSPDSRCFSLDSRANGYARGEGLGMLVLKHIDDAIRDRDPIRAVIRGTGLNSDGRTAGITLPSAEAQARLIVNTYKMANLDPADTQYVELHGTGTKAGDNAESRVGHTEAAAGMAAIIKSVLCLEKGVITPNLNFATANPRLGLDSSGIIVPTSTIPWPECEARRCSINNFGFGGTN…
Akanthomyces_lecanii_RCEF_1005_RCEF_1005_GCA_001636795.1	g4511	KS-AT-DH-MT-KR-xCP-C-A-Red	MSPLPAQSEPIAIVGWSCRFPGQSNSPSKLWELLCEPRDVRQEFGPERLNLSRFYNKDGSTHGATDVKGQGYLLTEDSRLFDPAFFGISPLEADGMDPQQRILLEAVYETFEAAGYTLEQMRSSNTSVHVGVMTNDYSDIQMRDMETVPQYTATGTGRSILSNRISYVFDLNGPSITIDTACSSSLVAVHQAIQAMQSGDCKAAIVGGVNLILDPSMYIMESKLHMLSPDSQSRMWSSDANGYARGEGVAAMMLKPLSEAIQDNDDIRALIRSTGVNSDGHSQGITMPKASAQAELIRSTYRRAGLDPISDRPQYFECHGTGTKAGDPVEARAIFEAFIEQKSDNEEDAEEVTSQAQQDNEQEPMYVGSVKTVIGHLEGCAGLAGLIKAALAIENRTIP…
Akanthomyces_lecanii_RCEF_1005_RCEF_1005_GCA_001636795.1	g8063	SAT-KS-AT-DH-xCP-xCP-MT	MCQIESKLDALRGQAAAKQLSEFFSGNSSGELLCEESRNMTTIPLTIIAHIIQYISFLEGKGQSIDHSAVLGSAHSVGAQGLCVGLLSAVAVSSAMTKEEIGKLAASAIELGFCIGAFVDLDQHTVTDGTLYANLAVRWKSPMTLQSLGRFLTNYAGTYISVIRDVRDVTITTPASHAAALQQGLTQEGLSAMDIGLRGRYHSLAYEKVLQKIITVCKSRVDPQFGRDVKRVSVIKFRGTLSGPEEIARSTASSNGKIKTANSLYPEDAIAVIGMSCKFPGADSIDEFWSLLSRGTSMLSKMPEDRFDRKNLPRNAKGGLSFWGNFINDIDAFDHKFFKKSAREAASMDPQQRLLLEVTYQALESSGYFTTTAAESNVGCYIGACSVDYDGNVGSHPPT…
Akanthomyces_muscarius_na_GCA_040955805.1	g254	A-xCP-KS-AT-xCP	MTDSTSTELLLAGGLLGMDLRSTRNGLTSVGDSNGASDPSKLGHCLHYLLEDAAKKYPTHLALICGNTTLTYRELNEAANRFARVLVGLGIGKHDLVGVALDRSADLVVTLIAVLKTGAAYVPLDATFPSQRIRHTLDVAAPKILVVTAGMLGAFKSWAGVILSVDETTTGMASPQADSTNLDLDRDPEDLAYVIFTSGSTGKPKGVEISHEALCNLLLSMTEVFNCEATDRLLAVTTITFDIAALELFMPLLCGAAIVIAQGQDIKDAKAVRSLLEQHAVTTMQATPAYWQMLLDSGWKGSTALSKILCGGEAMSARLAARLLECGGSLWNLYGPTEATVWASAWRVQPGEGIVIGNAIANYQLYILDEQLQSVPQGQYGELYIGGCGLARGYHKNPE…
Akanthomyces_muscarius_na_GCA_040955805.1	g4525	KS-AT-DH-ER-KR-C-A-xCP-Red	MLGYYLDQPLDQFDAAFFNISGKEAEAMDPQQRLLLEVVYEALENAGVTLEAIRGTNTAVFAGSFTYDYQSMTNRDLAHYPKYTVTGTDANSILANRISYVFDLHGPSVQVDTACSSSLTAFHLGVQSLQTGESDMAIICGTALHFDPTIFITMAEFGMLSTDGRCRHFDASGSGYVRGDGVCAVVLKRQRAAELNGDRIRAVIKGTGTNHDGVKEGMTLPNNIAQAHLVRNIYNNAGLDPRDTGYFEAHGTGTQAGDPREALSIGEVFAVGRDDPLWVGSIKTNIGHLEGASGLAGVMKAMLSVERGKILPNMHFNKPNPKIDFDALKIKVPTETVEWNPENGIRRASINSFGFGGANSHVVLENYAGIKQSISGNKTVGVLPNRPFILPLSSHSENG…
Akanthomyces_muscarius_na_GCA_040955805.1	g366	KS-AT-DH-ER-KR-xCP	MSHPEPIAIIGFSCRLPGGNSNPRKLWDFLERGGIASNKVPKNRFNIDAHWDGSHKPRTMRPLGGMFLEDHDPADFDASFFEISKTDAIAMDPNQRQMLEVVFEGLENAGVPLEKLDGAPVGCFVGSFASDYGDMQGRDPDDRPANITVGVGRAILANRLSHFLNIKGPSMTIDTACSGSLAGLDVACRYLKTGEIDAAIIAASNLYLNPEHVMDIGAVGNAHSPTGLCHTFDISADGYVKAEAVSSIIIKRLSDAIRDGDPVRAVIRGSSTNSDGRTPGIASPSAEAQAVAIRAAYANAGITNLNDTAYLECHGTGTQASRAQIKSNLGHAEPAAGNSGLIKAVLAIENGRIPGNPTFENPSPKIDFAGWKVQASRYTIPWPNAALRRASVNSFGYGG…
Akanthomyces_muscarius_na_GCA_040955805.1	g5236	KS-AT-DH-ER-KR-xCP	MATPTPLAIVGMACRTSGDVRTVDEFWTMLSRSRHGSGPIPKNRYNAEAYYHPNPQKKGTFNQVGGYFIDRDFSVFDAPFFNITKQEASSMDINQRQLLECTYEALENAGLPKGKISGEKMGAFIGTKRADYRTGSLQDLNQVEMFEATSGHSSIQAGRISYYFNLNGPSFSVDTACSSSLHAMHAAVQSIRSGDCSSAIVAASNLYMNPDDLIQMSMLGLFTPTGKTYAFDHRGKSGFACGEGVGCIVIKPLDQALRDNDKIRSIIVNTGINQDGKTVGLTSPSAKQQEKLMREVYARANISPRDVGFVEAHGTGTKVGDPLEATAIHNFFGEGRTKRAPLYLGSVKTNIGHLENASGLLSVIKSTLMLERSFILPNTNFEKANPAIPLDEWNIKVPT…
Akanthomyces_muscarius_na_GCA_040955805.1	g7724	KS-AT-DH-ER-KR-xCP	MAIIILGVSFKGGHFLKENVADFDAPFFSIAAADAKAIDPQQRMLLEVCYEALENAGCTKEDIDGTDTSVYVGSFVKDYEQICLRDPDWQPQYAATGNALNFLSPDGKCFTFDARANGYGRGEGIGVVILKRLSDAIRDNDTIRAVIRGTRVNQDGRTTGITLPSKEAQVANISAVYKAAGLAFSDTAYVECHGTGTQAGDWRELKAVSETLGECRAPDNPIFVGSVKPNIGHLEGAAGVAGLIKAVLMLERERIPPHINFETPNPAIDFEEWKVQVSRAAQPWPANAKKRVSVNCFGFGGTNAHVILDGAAEYLSTRQLVAHHSTPLKVNGLPLQNGSAHSNTENLASDFLSNYAYTMGCRRSRLEWKTFYVSNSASDLVKQMSQSEQTPATTAIQIA…
Akanthomyces_muscarius_na_GCA_040955805.1	g1698	KS-AT-DH-KR-xCP-C-A-xCP-Red	MSSHQNEPIAIIGNACRFPGDSTSPSKLWDLLKQPREVSRNIDRFQSAGFYNKDGHYHGASNVQHSYLLNEDPRLFDAQFFNIPPGEAESIDPQQRMILETVYDAVETSGLVLENLRGTNTAVYVGVMCDDYGNICYVDQESIPTYAATGTARSILSNRVSFIFDWRGPSMTIDTACSSSLVALHQGVQVLRSGNAPVAVAAGANLIFSPNMFIAESNLNMLSPTGHSQMWDANADGYARGEGIAAVVMKRLSDAIRDGDNIECIIRETGVNQDGHTPGITMPSQEAQTRLIHETYARAGLDLSKPEDRPQYFEAHGTGTKAGDGVESKAIYKAFFPESDDEHDTLWVGSIKTIIGHTEGTAGIAGIMKASLAIQNNTIPPNMHFNTLNPEIKPYYGKL…
Akanthomyces_muscarius_na_GCA_040955805.1	g3195	KS-AT-DH-MT-ER-KR-xCP	MTSGDIAIVGMACRFAGDAKSPEEFHEMLQKGKDAWSKIPPSRFKAESFNHPSTDLSGTMVCEGGYYLEQDVSQWDAPFFTCSASEARSYDPQQRLLLEAAYESLENAGIPIESIANTDAACFVGAFSEDYKLIVSRDLHAAPKYAKTGTALSILSNRISWFFNLRGPSVTCDTACSSSMAALHLACETIRSDTNPTRCALVGGTNLILDPDDQCGLNALGFFSPDSRCFSLDARANGYARGEGLGVLVLKHIDDAIRDRDPIRAVIRGTGLNSDGRTAGITLPSVEAQARLIVNTYKMANLDPADTQKQPLYCGSVKSRVGHTEAAAGMAAIIKAVLCLEKGVITPNLNFSSANPRLALDSSGIIVPTSTIPWPDCEARRCSINNFGFGGTNAHAVID…
Akanthomyces_muscarius_na_GCA_040955805.1	g8716	KS-AT-MT-KR-xCP-C-A-xCP-Red	LLQQPRDILNEIHPDRLNLKRYYHPDGETHGATDVANKAYTLEEDISLFDASFFGISPLEAAGMDPQQRMLLEVVYESTERAGIPLDQLRGSLTSVHVGVMTNDWAHIQRRDPETMPQYTGTGIAGSIISNRISYILDLKGASETVDTACSSSLVALHNAARALQSGDSDQAIVAGVNLILDPDPFIFESKLHMLSPDSRSRMWDKSANGYARGEGTASLILKTLTQALRDGDQIEGVIRSTLVNSDGLSSGLTMPSAVPQTALIRQTYLKAGLNPVKDRPQFFECHGTGTKAGDPVEARAISDAFIPKNRVRSSASVDTPLYVGSVKTVLLSLKHGIVPPNILFNELNPDIARYYGPLQIPTTAIPWPKLAAGVPLRASVNSFGFGGTNAHAIIERYD…
Akanthomyces_muscarius_Ve6_GCA_028009165.1	g251	A-xCP-KS-AT	MTHLTSKAQLLANGLLDMDARLTRSGSTTINNLNGTDNPTKLGHCLHYLLEDAARKYPTNLALICGNTTLTYQELNEAANRFARVLVGLGIGQHDLVGVALDRSASLVVTLFAVLKTGAAYVPLDATFPSQRIRHTLDVAAPKILVVTASMLGAFKSWAGVILSVDETTFNTASTQAESINLELNRHPEDLAYVIFTSGSTGKPKGVEVSHGALCNLLLSMKEVLNCEEADRMLAVTTATFDIAALELFMPLLCGAATVIGQGQQIKDAKAVRGLLEQHAVTMMQATPAYWQMLLDSGWKGDPALDKLLCGGEAMSARLAARLLECGGSLWNLYGPTEATVWASAWRVQPGEDIIIGKALANYQLHILDEQLRPVPQGQYGELYIGGSGLARGYHKNPG…
Akanthomyces_muscarius_Ve6_GCA_028009165.1	g2804	KS-AT-DH-ER-KR-xCP	MATPTPLAIVGMACRTSGDVRTVDEFWTMLSRSRHGSGPIPKNRYNAEAYYHPNPQKKGTFNQVGGYFIDRDFSVFDAPFFNITKQEASSMDINQRQLLECTYEALENAGLPKGKISGEKMGVFIGTKRADYRTGSLQDLNQVEMFEATSGHSSIQAGRISYYFNLNGPSFSVDTACSSSLHAMHAAVQSIRSGDCSSAIVAASNLYMNPDDLIQMSMLGLFTPTGKTYAFDHRGKSGFACGEGVGCIVIKPLDQALRDNDKIRSIIVNTGINQDGKTVGLTSPSAKQQENLMRDVYARANISPKDVGFVEAHGTGTKVGDPLEATAIHNFFGEGRTKRAPLYLGSVKTNIGHLENASGLLSVIKSTLMLERSFILPNTNFEKANPAIPLDEWNIKVPT…
Akanthomyces_muscarius_Ve6_GCA_028009165.1	g506	KS-AT-DH-ER-KR-xCP	MSDLHVLRNPDEAGQLSARNLSYDPEPIAIIGFSCRLPGGNSNPRKLWDFLERGGIASNKVPKNRFNIDAHWDGSHKPRTMRPLGGMFLEDHDPADFDASFFEISKTDAIAMDPNQRQMLEVVFEGLENAGVPLEKLDGAPVGCFVGSFASDYGDMQGRDPDDRPANITVGVGRAILANRLSHFLNIKGPSMTIDTACSGSLAGLDVACRYLKTGEIDAAIIAASNLYLNPEHVMDIGAVGNAHSPTGLCHTFDISADGYVKAEAVSSIIIKRLSDAIRDGDPVRAVIRGSSTNSDGRTPGIASPSAEAQAVAIRAAYANAGITNLNDTAYLECHGTGTQASRIKSNLGHAEPAAGNSGLIKAVLAIENGRIPGNPTFENPSPKIDFAGWKVQASRYTM…
Akanthomyces_muscarius_Ve6_GCA_028009165.1	g5030	KS-AT-DH-ER-KR-xCP-C-A-xCP-Red	MLGYYLDQPLDQFDAAFFNISGKEAEAMDPQQRLLLEVVYEALENAGVTLEEIRGTNTAVYAGSFTYDYQSMTNRDLAQYPKYTVTGTNANAILANRISYVFDLHGPSVQVDTACSSSLTAFHLGVQSLQTGESDMAIVCGTALHFDPTIFITMAEFGMLSTDGRCRHFDASGSGYVRGDGVCAVVLKRQRAAELNGDRIRAVIRGTGTNHDGVKEGMTLPNNKAQAHLVRNIYKNAGLDPRDTGYFEAHGTGTQAGDPREALSIGEVFAAGREDPLYVGSIKTNIGHLEGASGLAGVMKAMLSVERGKILPNMHFNTPNPKIDFEALKIQVPKETIEWNPENGIRRASINSFGFGGANSHVVLENYAEIQQSVLDNKIAGVVPKRPFILPLSSHSENG…
Akanthomyces_muscarius_Ve6_GCA_028009165.1	g1385	KS-AT-DH-KR-xCP-C-A-xCP-Red	MPSHQNEPIAIIGNACRFPGDSTSPSKLWDLLKQPREVSRNIDRFQSAGFYNKDGHYHGASNVQHSYLLNEDPRLFDAQFFNIPPGEAESIDPQQRMILETVYDAVETSGLVLENLRGTNTAVYVGVMCDDYGNICYVDQESIPTYAATGTARSILSNRVSFIFDWRGPSMTIDTACSSSLVALHQGVQVLRSGNAPVAVAAGANLIFSPNMFIAESNLNMLSPTGHSQMWDANADGYARGEGIAAVVMKRLSDAIRDGDNIECIIRETGVNQDGHTPGITMPSQEAQTRLIHETYARAGLDLSKPEDRPQYFEAHGTGTKAGDGVESKAIYKAFFPESDDEHDTLWVGSIKTIIGHTEGTAGIAGIMKASLAIQNNTIPPNMHFNTLNPEIKPYYGKL…
Akanthomyces_muscarius_Ve6_GCA_028009165.1	g6323	KS-AT-DH-MT-ER-KR-xCP	MTSGDIAIVGMACRFAGDAKSPEEFHEMLQKGKDAWSKIPPGRFKAENFNHPSKDLSGTMVCEGGYYLEQDVSQWDAPFFTCSASEARSYDPQQRLLLEAAYESLENAGIPIESIANTDAACFVGAFSEDYKSIVSRDIHAAPKYAKTGTALSILSNRISWFYNLRGPSVTCDTACSSSMAALHLACETIRSDTNPTRCALVGGANLILDPDDQCGLNALGFFSPDSRCFSLDSRANGYARGEGLGMLVLKHIDDAIRDRDPIRAVIRGTGLNSDGRTAGITLPSAEAQARLIVNTYKMANLDPADTQYVELHGTGTKAGDNAESRVGHTEAAAGMAAIIKSVLCLEKGVITPNLNFATANPRLGLDSSGIIVPTSTIPWPECEARRCSINNFGFGGTN…
Akanthomyces_muscarius_Ve6_GCA_028009165.1	g5	KS-AT-DH-MT-KR-xCP	MRSSNTSVHVGVMTNDYSDIQMRDMETVPQYTATGTGRSILSNRISYVFDLNGPSITIDTACSSSLVAVHQAIQAMQSGDCKAAIVGGVNLILDPSMYIMESKLHMLSPDSQSRMWSSDANGYARGEGVAAMMLKPLSEAIQDNDDIRGLIRGTGVNSDGHSQGITMPKASAQAELIRSTYRRAGLDPISDRPQYFECHGTGTKAGDPVEARAIFEAFIEQKSDDEEDAEEVTSQAQQDNEQEPMYVGSVKTVIGHLEGCAGLAGLIKAALAIENRTIPPNMLFSELNPEIKDYYGQLQIAAEARPWPAVASEQPLRASVNSFGFGGTNAHAILESYKKDSGSAEGQSQVGNATQVAGHPVGPFVVSGFSSASLLGNLGALLQLVKDDLSLNLDDVAWA…
Akanthomyces_muscarius_Ve6_GCA_028009165.1	g4107	SAT-KS-AT-DH-xCP-xCP-MT	MCQIESKLDALRGQAAAKQLSEFFSGNSSGELLCEESRNMTTIPLTIIAHIIQYISFLEGKGQSIDHSAVLGSAHSVGAQGLCVGLLSAVAVSSAMTKEEIGKLAASAIELGFCIGAFVDLDQHTVTDGTLYANLAVRWKSPMTLQSLGRFLTNYAGTYISVIRDVRDVTITTPATHAAALQQGLTQEGLSAMDIGLRGRYHSLAYEKVLQKIITVCKSRVDPQFGRDVKNTADPWILSIGADALPRSTTKRVSVIKFRGTLSGHEEIARSTASSDGKIKTANSLYPEDAIAVIGMSCKFPGADSIDEFWSLLSRGTSMLSKMPEDRFDRKNLPRNAKGGLSFWGNFINDIDAFDHKFFKKSAREAASMDPQQRLLLEVTYQALESSGYFTTTAAEPNV…
Albophoma_yamanashiensis_JCM_11844_GCA_001600555.1	g5851	ER-KS-AT-DH-MT-KR-xCP	MSAQPPAKQTAIVGLGDGNIGLQRDAAVPQLADDMILVRNVAVALNPIDAKFVGKLATPGAIAGMDFAGEVVAVGSNVRTVAPIQVGDRVCGAVPGMHALSPDVGAFAEYVGAADVTTMKIPSYMSFEAAASLGSGMGTIGMALFQSLNVPGTPKHPADKPVNVLVYGGSTATGTLAIQLLKLAPLCTDDIRSYTRNSLGFVLDCISEPETMQFCYACIGRAGGKYTALEPYPEFLHTRPNTVVPDWVLGPTVLGKKIGWPEPFAREPSEEQRAFGIEWFATAQELLDSGKLKPHPLRLVAGGLGSVLYGLEQLRLKKVSGEKLVCRIQASSHENMDRILAEESTPSGEKRYLVSYTGPEAGSSKWVELDKLQEKPQVLHDCPSKLWDLFKSPSDVSET…
Albophoma_yamanashiensis_JCM_11844_GCA_001600555.1	g2801	KS-AT-DH-ER-KR-xCP	MPYIRSSAPSRDSNSDAGDQLLQRSLGQSIIDDASYAENIKCLVQDYAEKPLSEQLEPIAVVGMGCRLPSDVKSPDEFWKMMLNKETGQMDKVPKSRFDIDAHYHENNERPGSFAIKGGYFLHETLKEFDPNFFGVTPIEAMWMDPQQRKLLEVVYETFESAGVSLLEISGSQTAVFVASFTADFQQMAFKEPSFRHSLAATGVDPGIISNRISHVFNLRGPSIVVNTACSSSVYAMHNACNALRNKECSAAVVGGVNLVLTVDQHMNTAKLGVLSETATCHTFDASADGYGRAEGVGAVYLKRLCDAVRDGDPIRGVLRSSATNNNGKIPGVGITHPNLEGQESVIRHAYRRGGDLDPRLTGLFECHGTGTAVGDPLEVHAVSNAMNERRRPEDGPLT…
Albophoma_yamanashiensis_JCM_11844_GCA_001600555.1	g3503	KS-AT-DH-ER-KR-xCP	MTNQEYQEPIAIIGMGDISSPSELWDFLAQGKSAQSDFPSNRLNIDSWYHPDSQRPGSISTKGGYFLGEGDSFRDFDPSFFSISPLEAASMDPQQRKLLEVVYESFESAGLCLGDVSGSNTGCFVGNFTWDIGQAQARDVDYVAPYQMTGGGLTILSNRVNYVFNLKGPSTMYALHMACKSLQAGDCSAAVVGGTNLIFGIEQQIGSVKLGTLSPTSTCHTFDASADGYGRAEAVGAIYIKRLSDAIRDQDPIRAVLRATSVNTNGKGPGISHPSTADQEVVIRKAYANAGLDFHDTGYFESHGTGTPVGDPVEFSAIGNIFGPLRREEDPLLVGSVKTNLGHSEAASAIPSLIKVVLSLEKGLIPATVGIKKFNPKLDFRGGALKVVQTLTPWPQDHS…
Albophoma_yamanashiensis_JCM_11844_GCA_001600555.1	g7656	KS-AT-DH-ER-KR-xCP	MPPGAPIAIVGMSCRLSGDVSTLDDFWTLVSRSRDGWSPIPAERFSSDAFHHPNPQKKGCFNQKGGYFMKRDFAKFDAPFFHITKQEALAMGRRQLLECTYEALENAGIPKESIAGSNMGVFIGGASSDYRQGTLRDLSQIPMFDATGNHQSIQAGRISHYFDLRGPCFAIDTACSSSLYALHSAVQSLRSGETDSAIVAGCNLHLQPDDSISMSMLGIFNDQGKTFAFDHRAKSGFARGEGVGCLILKPLEQALKDNDKIRSIIVNTGTNQDGKTVGLSTPSGEAQEQLIRDVYARAHISPDDTGFVEAHGTGTKVGDPIEAGAIYRVFGPGRTRRSPLYMGSVKTNIGHLENASGIISVIKASLMLEKGFILPNVNFERANDAIPLNEWNIKVPTSI…
Albophoma_yamanashiensis_JCM_11844_GCA_001600555.1	g8152	KS-AT-DH-ER-KR-xCP	MENDKCIPLAIVGMGFRLPGEATSVEGFWNMLSEARCARTKIPKDRYDVDGFYHPSPDRQGGVITKEGCFLTEDVGLFDAPFFSITANEADAMDPQHRMLLEITYEAFENGNYVGGFGHDYELLSGADMQDQSMYQATGTGNSMMANRISWFYDLRGPSFVVDTACSSSMLALHEACRELYCGSSKMAIAAGASLILKPETWRGLTAQRFLSPDGACHTFDSRANGYGRGEGFGVVIIKPLADALRDNDVIRAVIRGIGTNQDGKTPAITVPNPEAQIDLIRETYDRAGLDYSQTGYFEAHGTGTAVGDPMELTAVGRTFGASKTEDDLPLLVGSVKSNIGHLEGTSGVAGVIKTVLILERGAIPAVAEFENLNPKLRLDEWNLKIPARLTPWPTDGLR…
Albophoma_yamanashiensis_JCM_11844_GCA_001600555.1	g3929	KS-AT-DH-ER-KR-xCP-C-A-xCP-Red	MACPVNKPVEDPSVIVGLACRVPGATTPSKLWEMIAEQRDVQKTMPKDRLNVDGFFHPEPTHKGTTNARFGYFLDQDIGAFDAGFFGISGKEAEAMDPQQRLLLEVVYEALENAGITLQEIRGSLTSVFCGSFTNDYNAMLTKDLESYPKYTVTGTGDAILANRISYFYDLHGTSVTIDTACSSSLVCFHLGSQTLQNGESDMSIIVGSSLHYDSNIFVTMTDLGMLSTNGRCAAFDASASGYVRGEGITCVVLKRKSEAVLRGDTIRAVVRATGSNHDGKKNGITLPNSAAQEQLIRTTYERAGLDPGHTQYFEAHGTGTAAGDPIEARAIGAVFSADRHEPLYVGSVKTNIGHLEGASGLAGVIKTTLALERGMIPPNMHFKNPNPNIDFENWKIAV…
Albophoma_yamanashiensis_JCM_11844_GCA_001600555.1	g2680	KS-AT-DH-KR-C-A-xCP-Red	MTYSHSPKEPIAIIGSGCRLPGHSTSPHKLWDLLCAPRDITKEVPESRFNAQGFYHPDGEHHGASNVTKAYFLEDDPRLFDSVFFNIAPREAEAMDPQQRILLETVYEAMESAGLTLRSMRGSPTACYVGVMTGDYAEVVTRDPETFSQYMATGTSRALISNRVSYVFDWSGPSMTIDTACSSSLVAVHLAVQSLRSGESTVACAAGSNLILNADSFIGETSLHMISTDGQSKMWDASANGYARGEGVAAIFLKPLSKALQDGDRIDAIIRETGVNQDGRTQGITLPSPEAQAALIRSTYCRAGLDIEKASDRCQYFEAHGTGTQAGDPREASAISLAFFPDKNLESKQKLYVGSIKTIIGHTEGCAGVAGLLKAALALKNKTIPPNQHLNILNPSVAT…
Albophoma_yamanashiensis_JCM_11844_GCA_001600555.1	g1509	KS-AT-DH-MT-ER-KR-xCP	MGSIAYDQKQSDGFEPIAIVGMGCRWPGDSETPSQLWGFLDARMNAYSKFPADRIRTESFYHPDSNRPGSFYTEGGAFLKSNVREFDHTFFGIHPREALSMDPAQRKFMEVVYEAFESSGTPLHELAGSKTGCFVGNFNYDHQLMQYRDAEYPQPYSVTGGGITVLSNRVNYIFDLKGPSMTLDTACSSSMYALHLACSAIHSGECTAAVVGGSNLILTPECQIFSSMLGAVSPTSICHTFDAAADGPDGQEAVIRRAYERAGGLNPALTGYFECHGTGTAVGDPLEVSAIGRVFASSKSVSSPLLIGSIKSNIGHIDLKQGAIKIVTESMPWPEDAIRRASVNSLDTVYARSTHKNGHTNGHGHTNGNGHTNGNGHTNGNGHTNGHTNDKKIKASHPR…
Albophoma_yamanashiensis_JCM_11844_GCA_001600555.1	g1532	KS-AT-DH-MT-ER-KR-xCP	MVEKRNGLCEVPQDRYNIAGFYDPSGKPGTFRMNKGYFLQDVDIQQFDTSFFSISKAELERLDPQQRQLLEVTYECMEDAGAISWRGTNIGCYVGVFGDDWQDLNAKETQQSGGYRVTGYDDFVLGNRVSYEFDLHGPSVNCDGRTQAMLTPCPKAQEALIRRAYWQAGIQDLSETAIVECHGTGTRVGDPLETTAVANCFGDKGMIITSVKPNVGHSEGAAGLTSLIKAVLAIEHRQVIIESLQQYEKCNREMMNGVGRLDGYGISDTEKSTGTSYSNPNGQAEVITCDLTSENGRTNDDAWVNEMGAELIDSNRIFQTTVRNLDKFLRGLPTPPCWTIEEELRKVAGTSRVHEAEMGHPLSIAVQVALVDVLRSWGITPDFVVGHSSGEMAAAYASG…
Albophoma_yamanashiensis_JCM_11844_GCA_001600555.1	g5817	KS-AT-DH-MT-ER-KR-xCP	MGLTAGADGTNAQILDLPGFDKSDSSINSHSHTNSRADDYSNGHSNGHGNGHTNGHGDGHVNGHTNGHTNGHTNGHSKTTSSGVKGSQNIGTPEPIAICGMPGSVKTEYGYFLDESIDIAAVDTSFFTMRRAEVERADPQQRQMLEVARECMEDAGESNWKGRPIGCYMGSFGEDWTEIFAKENQQYGLYRVTGYGDFMLPNRVSYEMDLMGPSMVIRTGCSAALVALHEACLAVSRGDCEGAIVGGVNLIMAPGMTAAMTEQGVLAPDGSCKTFSADANGYARGEAVSAIYIKPLADAIRDGNPVRAVIRATASNSDGKGTAGGIQVPNDVAQEAMIRRAYELAGITDYSETAFVECHGTGTTIGDPIETRAVGRVFGPSGGVQIGSVKPNLGHSEGA…
Albophoma_yamanashiensis_JCM_11844_GCA_001600555.1	g2607	KS-AT-DH-MT-KR-xCP-C-A-xCP-Red	MSKPVGIIGSACRFPGGANSPSKLWELLKAPRDVVSEFPPERLNLWSFYHQNGEHHGSTDVQNKSYLLSEDPRVFDASFFRISPSEADGMDPQQRILLETVYEALESAGCPLDQVQGSLTSVYAGLMNGDYADIQARDLETIPTHNGTGTHRSILSNRISYFLDARGASMTIDTACSSSLVALHQAVQSIRLGESDMAIVAGANLLLDPTMYVAESKLHMLSPDSRSRMWDAAANGYARGEGFAAIVLKPLDVAVRDGNQVECVIRGSAVNSDGRTAGITVPSATAQTALIRQAYRDAGLDPLADRCQYFEAHGTGTRAGDPVEARAIRDAFFPEEHGDTNYQGKLLVGSIKTVVGHLEGCAGLAGVLKASLAMQNRTIPPNMHFNELNPAIEPLYKNL…
Albophoma_yamanashiensis_JCM_11844_GCA_001600555.1	g4080	KS-AT-DH-MT-KR-xCP-C-A-xCP-Red	MTPSKQEPIAIIGSGCRFPGGSSTPSKLWDLLSQPRDVLTRIPNERYNPTAFYHPNGQRPGYTNVQHAYTLTEDYREFDPSFFSLKPVEADSMDPQQRVLLETVYEALESAGQTIESLQGSNTAMYCGLMCMDYHDTGIRDLDSLPTYFATGASRCIISNRVSYFFNWHGPSMTIDTACSSSLVAMHQAVQVLRSGESRVAVAAGANLILGPEVFISESNLKMLSPDGRSRMWDSKANGYARGDGVAAVVLKTLSAAIADGDHIECIVRETGVNQDGRTKGITMPSSEAQMQLIRDTYARAGLDLQRSSDRPQYFEAHGTGTPAGDPVEARAIRDAFFDEEKLATDLKDEFLYVGSIKTVIGHTEGTAGLAGVLKASLALKHGVIPPNMLLSNLSSSVK…
Albophoma_yamanashiensis_JCM_11844_GCA_001600555.1	g6554	KS-AT-xCP-Te	MPFNTTIHWHGLLPKCHAQSVFKQITTNSEDLQAIKKAINNPHLLVVSDWSNLTSWEYFQGMVDSELDILCFPFVYATEGPFLPGNQSAIPNHMWKNCVMGHNVNETIVVEPEDKWVSLNIVMASTMKAIVFSIDSHSMWLYEIDGQSVKPAKFEWITLLPAKRYNVLIKLDQTPGNYTIRVPDQGFSQIISGFGVFSYKGGSHVGNATPYIDYGGQPLNNNTAGFDYTSMLAPYPALKPARKSDVAHVLDLYRWDKAYTWSLSGSAVMPVDAWAYEPLLYNPNSEAANDTSLVIKTNYGQWVDLIMQVGSKKGEEQEISHVIHKHSSKTWQITPRRLARDVAPPIGIFSDWEEMSHYLRERPGLQDCLTITLKVLHIRLGRNTGLNTFFEGSHDALRN…
Albophoma_yamanashiensis_JCM_11844_GCA_001600555.1	g6470	SAT-KS-AT-PT-xCP	MPPSSQVEDKVGEKSASGSEPTLLYFGNEFPSDDLNELFRRLQQHSKDRRFRLLNAHLEESTLVLQDEINKLPHHIRSQVPHFDNIVTLSENGYLRDLGLGAAMESALLIVLQLGLFIGHHEALERELDVSGGTTTVAGLSVGLFSGAAVALSTTLAEVVRNGAECLRVSFRLGVYVGDFSQKLEAPHPDGLPQSWAHVVTGLAEDSVRAELDRVNKELENPEISKVFVSAADKSSVSVSGPPSRIKAAFLQSSDLRYSKSLPLPVYDGLCHASHLYGQEDVDAVLDKEAALIPLTRSLRLPIISSRAGTPFSAATAGDLLSEIATELITGAIYLDKVTAGILRHIGAAPETQKCRIDSFRTSIIFKGIVDAINSTFAGIAVTKNDMVEWVHRDFGTRS…
Albophoma_yamanashiensis_JCM_11844_GCA_001600555.1	g4345	SAT-KS-AT-PT-xCP-xCP-Red	MVDHLKLYLFGDQTFSLQPHLRNLLQKRDNPFLQYFLSKAYDAVRVEMYRLPSQVRDDLPRFTCVEDLVSWDQSGKRCVALDMALATMYHLGAFISCSSSTTDLVPMAVDAVITAFRTGILVTDVAKRLDQSQELDQSWAMLVPGSTSAAAVQQFCEKSHLPLTSRPYISAYAPNGITVSGPPRSLAQLVSSPSFKGLTSKCIPIYGAYHTPHLYSQLDARGMVSHSSYNAATTRSEQIPLLSSTGIRLEERRFAVLLEEAVGQVLLHPLYWSSILGDLRACLQDVNPTQFSVVPIGSSAHNLIYTSLKQTPLRSLVPNTSAQNELPSLHATSAFSPKKPKLAIIGMSGRFPGAKNDEAFWDVLYQGLDVHKPVPGLHWDAKTHVDPTGARKNTSATPF…
Allantophomopsis_cytisporea_ATCC_66955_GCA_024752435.1	g4700	KR-xCP-KS-AT-DH-ER-MT-KR-xCP-xCP-xCP-xCP-KS	MDVTDVGAMGQLKAKLQNRGWLPIRGVVHAAGVLDDVTLARISAKSFDVVHRPKVVGARNILECLCNGNIDKLEFFVGFSSVASLLGLPAQASYAASNAQLDAMVTHLRKTQGLPAITVQLGGVTDVGMSARVSDHVHTWGVGQIASIDFGCLLEKMIRMAKSPRYSTLVGANLDWKTLSKSRRPEQNMVLSAFTSSSSAPLVWQEVQGTGNNEASEARRQLSPFSSAPKESVCGLSSDEVTKTIKEVLMNVAGLEVGMDESLYEAGLNSLSAIQFRNVLAENFFQVELPPTLIFDYPSVNHIVQHICQQQQSIAVVLPVSIGALSAKTERAVPVDGNDIKEIDEAIAVIGVEARMPGSANSFDEFWENLCAGVDGIRDVPYARFDADDYLDDNMMAGG…
Allantophomopsis_cytisporea_ATCC_66955_GCA_024752435.1	g4908	KS-AT-DH-ER-KR-xCP	MVPTPHSPNFTPIPNSAANSVNFTNGTNFAKSSNGVDDTTGTNGTNGANGTLPPTKDEHAPIAIIGMSCRLPGEVTSPQEFWELLSRARSGWSEIPKERFNSAAFYHPNPEKHGCYNPIGGHFLKEDLGLFDAPFFNVTKQEAIAMDPQQRILLECTYEALESSGIPKEKLVGKNVGGSHLNFLPDYFVTMSTSRLFNETGASYSFDHRGTSGFGRGEGAGVVVLKPLDQAIKDNDHVCAVIRASGSNQDGKTNGITVPNGDAQVELMRTVYKNAGLDISDVGFVEAHGTGTKVGDPIEASALHQVFGEGRTAKTPLYIGSVKSNVGHLEGASGVISVIKAAMILEKGLILPNINFEKGNEAIPFKEWNLKVPTSVRPWPRGKRYISVNNFGFGGTNAH…
Allantophomopsis_cytisporea_ATCC_66955_GCA_024752435.1	g4702	MT-xCP-KS-AT-DH-MT-KR-xCP	MRVRSITVQPTSSICHILSELSQSYSDTILIDIASILASTVDKSSSALAPLLELFEALAAISEYQKTRIIFITEGLFSVSGNEAAQIEADRTDVTALVFRFAALLKIERIDIDARSPTRANAEALCYMLGAHDMKNANEGNLGGITAVRECYKLYKPVWVEAARVPNACDVGDALYASFPCFRDRQQTSEMESLLSETCMEALGAIVDPSIFERGSEALARLAKQSLVAAIASLTKEELNRSVPLHLKKLCERYKQTKDLNSDGGAILPETVATERYQDEIAALFNEFPWLKPSITLLGNAIERHRDVLLGKLAPLDVLFAKEKPVDNRGHENAQHIAVSGAATDVYDEAVLAKVHKSVVKAIISRLCDLASSSGHRLRIIEAGAGTGGTALPILQMLK…
Allantophomopsis_cytisporea_ATCC_66955_GCA_024752435.1	g1379	SAT-KS-AT-PT-xCP	MKVAYFSNEFPHDDTRDLFRRLYVHSKDKRYPTLARFISEATLALRNEVAALPTALRALVPTFDTVFDLVEQTAVRQGRLGGAIDGVLLCALHIATFIGFYESGTEEEFDLSAVDTCLAGLGTGLLSTVALSLSPSLADLPTTGALVIGIAFRLGVVVDDVSENLQPRPTIADSGPGDSWAYVVPDVSPEEIQKELDTIQGAEKTPEPSKIFVSALSRTSVTVSGPPARLKHLFLVSAYFRDRKHVALPVYAGLCHAAHIYNEHHVEKIISSSSMDAVNAKYRPQARVLSTGTGRPFSGLTAKDLFHNVIEEILTKAIQWDEVIGGIIQRAKDSAAVECEVLLFRTSLPVHELLAAFGNDLSQFKATTKDLVSWIAKPDSPPAGPRGSAQSKIAIVGMA…
Allantophomopsis_cytisporea_ATCC_66955_GCA_024752435.1	g1902	SAT-KS-AT-PT-xCP-xCP-Te	MPDNMAFLIFGDQSLDTYGFLSEFCRRGSPSILATTFLDLVATALNTQISKLPSTERQKIPTFSSIQQLNERYHAQKYKNSAIDGALLCITQLAHYIDREEKNHEDVTRPFETCVVGLCGGLFAATAVASAPSLSALVSLGVELTLIAFRTGAQVAALAERLAQTTEQSDSWTYVVPGATETSAKAKLAAFHESASTPLAARAYISAITSTSIAISGPPSTLDALFKSEHAFEKKPTPIPVYGPYHAPHLHASTSIDQILRLDDPSVVETLGNAVPRFSVMSTTTGSWYTEKTTTELLKKIIYDILNEPLQFHHVLQGCLSRATNYRGSRCLVIPFGPTHAANSLANLLKSQTDLEVVLRNSPTKKDNEASAPGNHGTAGRGRLAIVGMSGRFPDAASH…
Allantophomopsis_lycopodina_ATCC_66958_GCA_024752465.1	g75	KS-AT-DH-ER-KR-xCP	MVSLTSSPESSEPQTPTNGQTNGQTNGHTNGHTNGTNGVNGHSSKESEDVPIAIVGMSCRLPGDVSSPEQFWELLSRARSGWSEHPKERFNSAAFLHPNPEKAGCYNPIGGHFLNEDLGLFDAPFFNVTEQEAISMDPQQRLLLECTFEAMENGGVPKEKLVGKDVDYFITMSMSRLFNDTGKSYSFDHRGKSGFGRGEGVGVVMLKPLDQAIKDNDHIRAVIRASGSNQDGRTKGITVPNGDAQVELMRSVYEKAGLNPFDTGFVEAHGTGTKVGDPIEASALHQVFGSCRTAKTPVYIGSVKSNVGHLEGASGIVSVIKATMMLEKGMILPNINFEKGNEAIPFAEWNLKVPTSVRPWPRNKRYISINNFGFGGTNAHVVLEKAPMVQGFGLNGVSG…
Allantophomopsis_lycopodina_ATCC_66958_GCA_024752465.1	g255	KS-AT-PT-xCP-xCP-Te	MHPTVLWPRYANSDIAIVGMSCRLPGAPDVESLWSVLEEGRDLHKRIPKDRFDAETHVDPTGKKVNTSHTPYGCFIEQPGLFDARFFSMSPREAAQTDPMHRLALVTAYEALEQSGFVLNGTPSTQSSRVGTFYGQTSDDWREVNIAQKIDTFFIPGGVRAFAPGRINYFFKFSGPSYSVDTACSSSLAAIQLACTSLRSGECDTAVSGGLNVLTAPDIFAGLSRGMFLSKSGGCKTFDSQADGYCRADGVGTVILKRVEDALADKDNILGVILGTATNHSAEAISITHPHAGAQAFLYENVLYAAGVDAQDVSYVEMHGTGTQAGDKTEATSVMQVFAPKNSPRKQPLHLGAVKSNIGHGEAAAGITALIKMLMMLRKNAIPPHIGIKNSINPSLPAD…
Allantophomopsis_lycopodina_ATCC_66958_GCA_024752465.1	g2230	SAT-KS-AT-PT-xCP-xCP-Te	MPDNMAFLIFGDQSLDTYGFLSEFCRRGSPSVLATNFLDLVSASLNAQISKLPSIERQKIPSFSSIQQLNERYHAQKYRNSAIDSALLCTTQLAHYIDRAEKKHEDITRPFETCVVGLCGGLFAAAAVASAPSLSTLVPMGVELTLMAFRTGAQVVALAERLVQTTEQSGSWTYVVPGATESSAKEKLAAFHESANTPPAARAYISAITSTSIAISGPPPTLDAFFKSEHAFEKKPTSIPVYGPYHAPHLHASTSIDQILRLDDPEVVETLGNAVPRFSVMSTTTGSWYTEKTTTELLKKIVYDILNQPLQFNNVLHGCLSRAANYRGTRCLVIPFGPTHAANSLATLLKSHTDLEVVLRNSPTKKDNEASAPGNHGTAGRGRLAIVEQGLDVHREVPK…
Alternaria_alstroemeriae_LH_A124_GCA_037044435.1	g8322	A-xCP-KS-AT-xCP	MVPENEFNLTDDPSKLGHNVVSLFEQIQSRYSPKPAIVCGDHTITYGVLASESDRLACLLLSRGISRGHVVALALDRTPDLIIFILGVLKAGAAYVPIDPALPSERVNQMLDDEALRLVIVSHASTKGMTSNCRCDYGHKAACCTTSELRDQMRYQADKKPAVDIQGDDLAYILYTSGSTGKPKGVEVHHAAICNYALSVHQRPGCTDQDRVLFRSTISFDMSAIEIYVPLLCGATVVQAQTYEIRDPRALIHLINHHAVTFAVTTPTILQMLLDSGWCGTPGLSKLLTGGEALSPRLAERLTACVEEVWNIYGPTETTMSVATWKVQVGEDILIGTPKANIRLYVLDADMRPVPVGGTGELYISGAGVARGYRNNPERTKAAFLPDPFWEGHTMYKSG…
Alternaria_alstroemeriae_LH_A124_GCA_037044435.1	g5893	KR-KS-AT-DH-xCP-xCP-MT-Te	MANDELIHKLTWSPTALSKEPLSIAHVVFVVAEKESESLSAYQAQLANEGITTVVTDDAMKINPLITPKTIVVYIPPTAKSKEEIYAAATQACTSLINVAQQLYHRSISAKSKTVKLFSIVPKDWGIGDLVYAPLHGLSRVLKTEIPEIMAALKYAQGFDVVRICEGEAQVAYLQPFTDELSDKKELQLHANSSYLITGGTGGIGLATAAWLAQRGARNIVLVSRRGLPPSSDSKAVEANSADLISRIAKLKAVGVSVHVLAVDISKPNADVTLSQTINDLDIPPIKGVIHAAGTAGYHTLTRCTPTDIADNLAPKVIGSLNLDALFPPGTLDFFVFTSSVGQLVGFPGQLAYAPSNAFLDALAAHRRRQGDNSMAILWAGWQGTGVWDQSKSAMRRLN…
Alternaria_alstroemeriae_LH_A124_GCA_037044435.1	g1620	KS-AT-DH-ER-KR-xCP	METPKSNECEPIAIVGMGCRLPGGVHDIPAFWEFLRDQKDVQGEFAAPRFSAQGFYHPNLDRPGTAVGSSGFLLKEDPRLFDPSFFGIIDAEAETMDASQRKLLEVTYEAFENAGETWDSVSGGRIGVFVGDISLDNYVSQTRDWDYSGKYSASGAFPNMLANRIHYIFNLQGPSLLINSACASSIYALHLAITAIRNGDCDSAIVAGSNWLMDPNSHMAMGKLGALSPSSRCHTFDESADGYARGEGYAALYLKTASLAMQDASPIRALIRGCAVNANGRTKGITNPSGRAQEALIREAYKNAGGLDPGETTFLECHGTGTRVGDPIEVAAAGNVFGPSRSNDPEDRLPIGSVKTNVGHLEGASVLPSILKVVASLEAGKIPATLGFQTPNPRIDFDQ…
Alternaria_alstroemeriae_LH_A124_GCA_037044435.1	g188	KS-AT-DH-ER-KR-xCP	MSPACDTVDMDGSPPPTETQALEPIAIIGYSCRLPGQVSSPSDLWELCTRGRSGWTPIPKDRWSVEAFHHPNASKPGTSNQAGGYFLGDISRFDAPFFNVSAQEAISMDPQQRFLLECTYEAMESAGISREYMAGRSIGVFIGANWPDYETNNIRDTETAPMFQATGGYPALQSNRISYMFDLKGPSLTVDTACSSSLVALHSAVQSLRSGECTEALVGGCHLLLTPENSITMSMQQLLNDEGKSFAFEERGNSGFARGEGAGIIMLKSLSAALRNRDPIRALIAHSGVNQDGKTRGITCPNGVAQEELIRRVYKEANLNPADCGFVEAHGTGTAVGDPIEATAIQAVFGKGRNARNPLYIGSVKTNVGHLEGASGIISVIKSAMMLERELILPNAGYK…
Alternaria_alstroemeriae_LH_A124_GCA_037044435.1	g2368	KS-AT-DH-ER-KR-xCP	MPGTQDSPVMPIAIVGIGGRFPGDASNPDRLWELLLNAKSTLSETPEDRFSADAFYHPQPDRPGTSNSCGGHFMNQNIEEFDAPFFSITPSEARAMDPQQRMCLEVAYEAMENAGITMDRISGSRTSCYVGCFNHDYQLLQNLDLDSLPFYHATGTESSCLSNRVSWFFNLAGPSMTVDTACSSSLIALHLACQSIRLGESETALVGGVNIISFPEIYMKLSNLQMVSPDSKSQTFDEKANGYGRGEGTCFVVLKPLDKAIEDNDVIRAVIRNTGSNEDGNTPGLTLPSKNMQKALIEKVYEEAGLQMRDTGYFEAHGTGTVAGDSIETQALGETIGKLRPPGQPLWVGSLKANIGHLEGGSGLASLIKTVYVLEKGVIPPQIWLDKLNPRIRAEEWNL…
Alternaria_alstroemeriae_LH_A124_GCA_037044435.1	g3337	KS-AT-DH-ER-KR-xCP	MEEQAKDTSGPEPIAIIGMGCRFAGEASSVEGFWDMLRLGRKEHGRVPASRYQASAWEHPSHERKGAINHDSGFFLAEDPSRFDAPFFSITSKEAAGMDPVQRILLEVAYEAFENGGVPMESLPGSATGVYSGCMTNDYELLSTRDIMDMPHNSATGNGRTMLANRLSWFFDLRGPSIMLDTACSSSLTALHLATQALRAGECSQALVTGASLILHPNFTQRLSYMHMLSADGISHSFDSKANGYGRGEGFGAILLKPLSKAMAGGDAIRAIVRATGSNQDGRTPGITMPNATAQADLIRSTYSQARLSMGNTSYFEAHGTGTAIGDPTELSAIGASFGAERKPGDEPVYIGSVKSNLGHTEGAAGVASIIKVVLCLEKGMLVPNAGFSNLNPKIRLEE…
Alternaria_alstroemeriae_LH_A124_GCA_037044435.1	g3830	KS-AT-DH-ER-KR-xCP	MAPSSSSIPSSVPSSPSVFTANGTGPHRDTARGQHEPIAIVGMGCRLPGDVNSPSRLWDFLKEGKSGQCKIPSSRFNVDAFYHPKGVDRPGSMHTTGGYFLQEDPRAFDPDFFGISPIEATYMDPQQRKLLEVVFEAFESAGASLDEVSGSNVGCYVGNFTVDFQVMQTRDPEYLHRYSATGMGTTILANRISHTFNLKGPSFVLDTACSSSLYCLHVACAALENGECDSAVVAGANLIQSPEQHLGTMKAGVLSGTSTCHTFSDEADGYGRAEGIGCIYLKRLSDAIKDNDPIRAIIRGTAVNSNGRTSGITLPSAEGQEAVIRKAYEKAALDFSQTMYVECHGTGTPVGDPIEAEGLSKIFHSRTGQPLLIGSVKSNLGHSEAASGISGIIKTVLAL…
Alternaria_alstroemeriae_LH_A124_GCA_037044435.1	g5474	KS-AT-DH-ER-KR-xCP	MTNTDSSLTPIAVVGMSCRLPGEVRTLDDFWTLISRGRDAWGPIPSDRMSSASYYHPDPQRKGCFNPKGGYFLQEDFSQFDAPFFHITQQEAIAMDPQQRLLLECAYEALENAGFPQQTMAGSRMGVFTSLCSSDYRRGAFRDLDSVPIFDATGNQESIQAGRLSHFFNLRGPCMAIDTACSSSLYALHLAVQSIRSGDADSALVGGARLRLQPDEMVSMSMMGLYNEQGKTFAFDDRAVSGFACGEGVGCLVLKPLDQALKDNDPIYSVIRNTGANHDGQTVGLTNPNGEAQEQLMREVYARANISPTETGFVEAHGTGTKVGDPIEVGAINRVFGDGRTKRTPLYLGSVKSNFGHLEYASGIVSVMKASLMLHRGFILPNANFKRANPAIPLDQWNI…
Alternaria_alstroemeriae_LH_A124_GCA_037044435.1	g6300	KS-AT-DH-ER-KR-xCP	MEHSTSTTPCEPIAIIGIGCRLPGQASSPSKLWDLLINNATGYGPVPPSRYNAAGYYHPDADRPGSINSTGGYSIQEDIHAFENVFFGINNLEATSMDPQQRKLLEVTYEALENAGIPQEKMHGSNTGVYVGNFTNDFLNMQYKDPEYSSRYTATGTGLAVLANRITHCFDLRGPSHVIDTACSSSLYALHSACLALDAGDCDAAVVAAANLIQSPEEQMVAVKAGVLSPDAMCHTFDEKANGYARAEGVSAVYLKRLGDALRDGDPVRSVIRGTAVNGNGRTPGISQPSVEGQRAVIRAAYRRAGLDPGETDYVEAHGTGTKVGDPTEVEAISGVFQHRTGRPTLVGGVKPNLGHSEGASGLSGLIKIILALENKIIPATVGVKVINPRIKCREWNVD…
Alternaria_alstroemeriae_LH_A124_GCA_037044435.1	g6890	KS-AT-DH-ER-KR-xCP	MNNTSSCPEPIAVIGLGCRFSGQAASLDGFWEMLRDGRKEHGPVPGNRYQAAAWKHPSHERKGAINHDSGFFLEEDPACFDAPFFSITAKEAAGMDPAQRLLLEVAYEAFENAGVPMESLPGSSTGVYSGCMTNDYELLSTRDIMDMPHNSATGNGRTMLANRISWFFDLRGPSIMMDTACSSSLTALHLATQALRAGECRMALVCGASIILHPNFTQRLSYMHMLSADGISHSFDSRANGYGRGEGLGAVLLKPLSQAIADGDVIRAIVRATGANQDGRTPGITMPNAEAQADLIRATYRQVGLSMRETAYFEAHGTGTALGDPTELSAIGASFGEERTPNDEPVYVGSVKSNIGHTEGAAGVASLIKVVLCLEKGTLVPNAGFVTLNPKIQTERWRL…
Alternaria_alstroemeriae_LH_A124_GCA_037044435.1	g8750	KS-AT-DH-ER-KR-xCP	MGIAHEFAIFQTKNGVNDSPNIGNNEKPRTNGFAALSGQPIAVVGMGMRLPGGVRTAEQFWDALIEKRDCSSEVPKSRYNVDGFYSADKPGAVRTRRGYFLEDDYIGNADLNFFPAIPGFEMDELDPQQTLLMEVIWECMENAGQTGWNGKDIGCYVGVFGEDWHELAAKETLSIPRVHAFANGAYTLSNRVSYQFNLKGPSATIMTACSSSLTALHEACQALNDGSCSSAIVAGTNMILTPSMTINMSDNTVLSPDGYCKAFDARANGYGRGEAVNAIYIKPLSRAIADGDNIRAVIRATSANYDGQSAKIFAPDIESQERLIRKAYQKAQIIDPSETGFFECHGTGTKIGDVVETTAIARFFGSRGMYIGSVKTNFGHGEGASGLTGVIKAILSLER…
Alternaria_alstroemeriae_LH_A124_GCA_037044435.1	g9576	KS-AT-DH-ER-KR-xCP	MACRLPGNSNSPTALWRFLEQGGIASTEPPASRFNLHGHEDGTKRIRTMRSPGGMFLENIDPADIDAQFFGLSRAEATAMDPQQRQLLEVVYEGLENAGITLESLRNQPVGCFVGSYASDWGDMQGRDPEDRVPNATVGVGRAMLSNRLSHFLNIKGPSMTIDTACSGSLVSLDIAARYLQTGEIDTAIVAGCNLYMSPEHCIDMSNLSGAASPSGRCHTFDAKADGYIKAEAVNMVILKRLPDALRQHDPIRAIVRGSATNSDGWTAGIASPSPEAQAAATRQAYRNAGISNLNDTSYVECHGTGTRAGDPIEVNSVASVFCATRTAERPLLIGSIKSNVGHSEPAAGLSGLIKTIMSLEKGCIPGNPTFETPNPAINFEALKTRAFQRTIQWPDVPF…
Alternaria_alstroemeriae_LH_A124_GCA_037044435.1	g2680	KS-AT-DH-ER-KR-xCP-C-A-xCP-Red	MAGDLRGRRTSQEPEVSTKESSPGFSPFESASSVTSIDGPNPAVLVGYACRVAGADRPSKLWENIVQQKDVRCKMPADRFNVDNFFHPDGTHKGTTNAKYGYYLDQDLGHFDRSFFRISGKEAEAMDPQQRLILEVVYEALEDAGITLEEINGSRTSVLCGSFTNDYNAMLTKDLEHYPSYTVTGTGNAILSNRVSYVFNLQGMSLTIDTACSSSLVAFHLGAQSVQSGDCDTSIIVGSALHFDPNIFITMTDLGMLSEEGRSRAFAAGVKGYARGDGVCAVILRGQRQAELHGDDIRAVVRATGSNHDGTKQGITLPSAAGQEELIRKTYQSAGLDPADTTYVEAHGTGTGRGDPLETEALGTVFGSKRRQQPLYVGSIKSNIGHTEGASGLAGIIKA…
Alternaria_alstroemeriae_LH_A124_GCA_037044435.1	g2292	KS-AT-DH-KR-xCP-C-A-xCP-Red	MAPEREPIAIIGSASRFPGNATSPQKLWDLLIHPRNVGKVIPGDRFSVDGFWNADGSHHGTSNVTQSYFIEDDTRHFDANFFNINPREAAAIDPQHRLLLEVTYEALESAGLSIDILRGTPTGVYVGLMCADYLDVQLRDPEALAQYHATGTARSILSNRVSYFYDWKGPSVTVDTACSSSLVAVHQAVQALRQGECSTAMAAGVNLIFGPEMYIAESNLRMLSPTGKSRMWDARADGYARGEGVGVVILKRLGDALRDGDPIESVIRETAVNSDGRTNGLTMPSSASQADLIRQTYRRAGLDPTQASDRCQYFEAHGTGTPVGDPLEAEAIHSAFFPESHDGCQVQESQLYVGSIKTVVGHTEGAAGIAGLLKASLALQHEIIPPNLHFKRLNPNIVP…
Alternaria_alstroemeriae_LH_A124_GCA_037044435.1	g9667	KS-AT-DH-KR-xCP-C-A-xCP-Red	MVSGYVPPKEEPIAIVGSGCRLPGNATSPSKLWDVLRTPRELSKRVPSNRFNIDGFYHPDPEYPGTTNTKSAYWMEEDPRTFDASFFNITPLEAEAIDPQHRMLLEVTYEALESAGMSIQKMQGSSTSVYVGSVACDYGDIVMRDPVTLSQYTATGTHRSILSNRISYFYDWRGPSMTIDTACSSSLVAVHQAVRSLRSKESRVACAAGVNLILGPELFITESALHMLSPEGRCRMWDAGANGYARGEGIAVVLLKRLSDALADGDHIEAIIRESALNQDGRTKGITMPSAEAQARLIQETYRRSGLDPTTSWGRCQYFEAHGTGTQVGDVREAEAIASAFFPSQTTETNDGEGSKLQVGSVKTIIGHTEGTSGLASLLKVALAVQHRVIPPNLHLETL…
Alternaria_alstroemeriae_LH_A124_GCA_037044435.1	g1168	KS-AT-DH-MT-ER-KR-xCP	MQSSNFEPIAVIGFGLKLPQQASTSAGFWDLLIQGRSARTETPTDRFNAEAFYKATAAGDRQRVGTIKTRHGHYIAESLDRFDAPFFSISPHEAECMDPQQRWLLEVAYHALENAGLSIEEVDGSNTSAFVGSFMNDFETMLHKDLDMPSTYHATGKASAILANRISWFYNLKGPSVAINTACSSSLVALHLACESLRTGETSMGLVCGSNLLFTPENTAGLSNLNFLSPDGICYAFDERANGYARGEGIACLVIKPLSAALSNQDPIRALIRGTGVNSDGRTPGISQPSPRAQIDLIRGTYARFGLALDQTRYFEAHGTGTQVGDPIEAEAIATVFRSGQHDRRPIYVGALKSNVGHLEGASGLAAVIKAILVLERGVIPPNIWHERRNPAIKEEWGL…
Alternaria_alstroemeriae_LH_A124_GCA_037044435.1	g1544	KS-AT-DH-MT-ER-KR-xCP	MQLLTTDGLVSRGGALQSSQALDGSDPVAVVGFSLRFPQDATSPQSFWKILQEGRSVTTEVPPDRFNINGFYHPDASRNDTVNARGGHFLKENVAAFDAPFFSMSPGEVESLDPQQRGLLETTYRALENAGIPVERAAGSATSVYVGALGVEYNRFFEFDEEVQATYKATGNSGAILANRLSWFYDLRGPSMTIETACSSSLIGLHLACQSLRSKESRMSLVCGSQLYLEPMTSAISLSALQFISPDSRCHSFGADGNGYAKGEGFGVLVLKRLSDAIADGDVIRAVVRATATNQDGRTPGISQPSQAAQEMLIREAYRSGGLDLASTRLFEAHGPGTKLGDPIEAGAIKSVFQKHRSPDDPMHIGAVKANIGHLEATAGLAGLIKTILSLEKGIIPPI…
Alternaria_alstroemeriae_LH_A124_GCA_037044435.1	g2188	KS-AT-DH-MT-ER-KR-xCP	MPGQQLEPLAVVGISLRFPGEAVSPESFWQLILSGRSTGKEIPPDRYGIDAWHHPDYSQLDRVSQRKANFLEGDIGQFDAGFFSISAAEAEAMDPQQRLALETAYHALENAGYPIESITGSKMAVFTGAFSNDYQRLHAKDLMTLPKGHATGTSMNMLANRVSWFFNLRGPSSNVDTACSSSLMALHLACQSIWNGESSSGMAIGCNAILGLDTVLALDNLGILSKDGRSYSFDERGNGYARGEGVGALIVRPLRDAIKNGDNIRALIRSTGSNQDGKTPGITQPSMERQEDLYRDTYERAGLSLDVTRYVEGHGTGTAVGDPIEARAIGNIFRPYRSSDDPVYLGSVKSTIGHLEGASGVAGVIKAVLAVEKGIIPPNTDLQTLNPRIDEEFLHVKVP…
Alternaria_alstroemeriae_LH_A124_GCA_037044435.1	g2370	KS-AT-DH-MT-ER-KR-xCP	MDSLAVIGYAVRYPQDASDSVRFWDFLLKAREASTAFPEDRINQKAFYHPDPDHGGTIHAKRAHFLKDDPASFDAAFFKMSKTEVLSLDPQHRLVMENVYHALENAGIPMETAISSNTSVFVNGYNHDHADSLNTDPETILKYKPTGTENSMISGRLSWFYDFRGPSLTVETACSGSLVGLHLACQSLKTNESDMAIVSGVNVIGFLPHMVGMDYSGFMGSEGRCFAFDHRADGYARGEGVGTVILKRLPSALEDGDTIRAVIRGTGLNQDGRTPGITYPSLRAQVRLIETTYQNAGLETEDTCYIETHGTGTQAGDYVEASSINSGFKTATRGLPLYVGALKTNIGHLEGGSGIAGLIKTIMILETGIIPPNANFEKPNPKIPVDDWKIRLPIQCEAW…
Alternaria_alstroemeriae_LH_A124_GCA_037044435.1	g3732	KS-AT-DH-MT-ER-KR-xCP	MGITVDEQNHASRSHEPIAIVGMAMRLPGRVNDSESFWRMLIEKRSGLCDVPKDRYHLDAFHDPHGKPGTVRMRQGYFLDDVDVRQFDSNVFSSPKKELERLDPQQRQLLEVSYECLENAGCTLWRGRKIGCYVGVFGQDWLDLNAKETQHMGAYRVTGYDDFVLGNRISYEFDLRGPSMTIKTGCSSSLVCLDLACKALRDGDCEGALVGGTSLIFSPTMSLALSDQGVLSPTGTCKTFDASADGYGRGEAINAIYIKTLRQAIQDGDPIRAVIRGTSVNCDGQTQGMLTPSPTAQEALMRRAYEMAGITDLGETAMIECHGTGTSVGDPLETTAVAKCFGETGIIITSVKPNVGHSEGAAGLTSLIKGVLALEHRQVPPNIHFSEPNPDIPFKTGKL…
Alternaria_alstroemeriae_LH_A124_GCA_037044435.1	g4586	KS-AT-DH-MT-ER-KR-xCP	MVSFSENRVHDAPGGNILAPLAVVGMSLKFPQDATSPEAFWNMLVEGRCVSTEFPTNRMNIDAHHDAERGRLHSVTCRGAHFMKEDLGLFDAPFFGINDADAKAMDPQQRLALETVYRALENAGLPIEQVAGSKTSVFAGSFCSDYHMLQIKDPLNVPKNATAGTGRNMISNRISWFYDFLGPSATVDTACSSSLMAVDLACQSIWGGNAAMGIAIGCNIILAPEMTIGLDNLGLLSRDSHSYSFDKRANGYARGEGVGAVVIKRLDDAIADGDTVRAVIRSSSSNQDGKTPGILQPSKDAQVRLIRDTYQKAGLDMGVTRYFEAHGTGTPIGDPIEARAIGTAFRSYRSEETPLYVGSVKSNIGHLEGASGIAGFIKAVLVLEKGVIPPNSSNLQNTN…
Alternaria_alstroemeriae_LH_A124_GCA_037044435.1	g5395	KS-AT-DH-MT-ER-KR-xCP	MPSRENGLSGSAPNPGSQTNDASTTFSPIAICGMALRLPGGLGSPQDLWGFLIAKGDARSRVPESRYNVSAFHSPSKRPGTVVTEYGYFLDESIKLGALDASRFSLSRAELEAADPQQRQMLEVVRECFDDAGEVNFRAQPIGCYMGCYGEDWLELQNKDPQQNGMNRVDGYSDFMLSNRVSYEMDLRGPSITIRTACSSALVGLNEACLALQRGDCDAAVVGGSSLIFAPAATAFMTEKGVLSPDGSCKTFSADANGYARGEAITAVFVKPLAAALRDGNPIRAVIRSVMSNSDGKTPGIAHPSTDSQEALIRKAYRAAGITNMAETAFVECHGTGTPTGDPVETLAVARVFGDAGVYIGSVKPNLGHSEGASGLTSLIKGVLALENRIIPPNIKFTA…
Alternaria_alstroemeriae_LH_A124_GCA_037044435.1	g5903	KS-AT-DH-MT-ER-KR-xCP	MTSPDLHPPAEIRAAALAVANALTQNETYALVGGSACVILGSTRATLDIDFVVPRGETSNARQLLRASPDFDVEARTNHTTYKARRPVQIEILTPPLLFKEPFDQNTEVILVEGMKVLKPALLLNAKCGSIIGRSTEDKRKTDFFDINFLLNFCAENPEHLPKADEVPRAKKQLVHILVQFYGGEDAWSRAGYGFQKVRANEDGANHAVVTNSICLDGCHVGTDGKGPSTNGDHVPQTALQVPIAICGDARGPVPKSRYSTAAHYSERSKPSTVNTEYGYFLDESIDLSAVDTSFFNMRKAEVERLDPQQRQILEVARECMEDAGEVNRKGRSIGCYIGTFGDDWLEMFAKENQHHGPYRATGYSDFMLPNRVTYEMDLTGPSMLVRTGCSASLVALHE…
Alternaria_alstroemeriae_LH_A124_GCA_037044435.1	g768	KS-AT-DH-MT-ER-KR-xCP	MGDGLILVQTNVRDPNSSPIAIVGMACRLPGGVKSPDELYQFLLEKKNGVCEVPETRYTVGSFYSATDPGTVKTRHGYFLQEDPMLFDAPFFSISNYEAGRLDPQQRQLLEVVWECLENAGETNWHGKNIGCYVGVYGEDWIDLASKDPQATDRYHVLGTGQFALSNRISYEYDFQGPSMTLQSGCSATMIALHEACESIHSGDSCGAIVAGTNLILSPTMTATMSDNGVMSPTGTCRTFDAKADGYGRGEAVNALYIMRLEDAIRDRNPIRAVIRATTTNSDGKTPSITTPGSNSQEALVRRAYEKADIQDMAQTGFFECHGTGTVAGDTAEASAVANLFKGKGVIIGAVKPNMGHGEGASAITSIIKAVVSLENKMILPNAFFDTPNPDIPFKEGMI…
Alternaria_alstroemeriae_LH_A124_GCA_037044435.1	g7881	KS-AT-DH-MT-ER-KR-xCP	MFFQRHPTPSTSSEGAYHLDEDREFAEPIAICGIGLKLPQDAASEDGFWKMLMERRSARTEFPKDRMNINAFYHPTRRNELGTRGAHFLQEDLSRFDADFFSITPSEAAAMDPMQRLLLETTVEALDTAGIRIEDLHGSRTSVHTGCFSNDYLHQLFKDPQRLPPYAAVGASPSMLANRISWFFNLRGPSFNIDSACSSSALAIDCACRLLLSGQTDMGLAAGCNLLLDPDYSIILSNNHMLSPDGRSYTFDARANGYSRGEGVAVLVLKRLSDALRDNDTIRAVIRATASNQDGRTPGITQPASEAQSQLIRETYAQAGLSLHHTRFFEAHGTGTPIGDPAEVSAIADCFRNHRTADSPLYLGAVKTNIGHLEGASGIAGVIKAILAVERGIIPPNTN…
Alternaria_alstroemeriae_LH_A124_GCA_037044435.1	g4521	KS-AT-DH-MT-ER-KR-xCP-xCP-C-A-xCP-Red	MPIPTPKTPPQTNGNGVDGHSNGLRLNGKDHDGMQGQIAICGVAMRLPGGIQSPDAFWDLLEHGRDARGPVPLSRYNLEGFYDSLEGKETIKTRFGYFIEDDLTTLDASFFSLTKNELEKCDPQQRKLLEVTRECLEDAGEVNYRGERIGCYVGTFGEDWLQMSAKESQHSGGYIMTGHGDLMIANRVSYEYDFHGPSLVIKTGCSASLVALHEACRALQTGDATGAIVAGTNLIMGPTTTAAMTAEGILSPEGSCKTFDAKADGFARAEAITAVYIKPLAAAIRDGNVIRAVIRATGSNSDGKSQSLMSPNGAAHEALMRQVYEDAGLDPAETAYVECHGTGTPTGDPIETTAVGNVFGQKGVFIGSVKPNIGHSEGSSGISSLIKAVLALEHNIIPP…
Alternaria_alstroemeriae_LH_A124_GCA_037044435.1	g2510	KS-AT-DH-MT-KR-xCP	MSVPEPIAIIGTGCRFPGSASSPSRLWDLLLHPRNVASKTPKDRFNHDAFYHPDKHHGTGNSPESYFLTEDPRAFDAPFFNVSPVEAESMDPQQRLLLEVVYESLETAGLTLEALRGSDTGVFCGLMSTDYANLISRDWDEVPMYTPSGTAASMLSNRISYFFDWHGPSMTIDTACSSSLVALHQGVSALRNQDCHIALVAASNLIFSPREYIAASRMHLLSPSGRCRMWDESADGYARGEGVASVVLKRLSDAIADGDPIECIVRATGINADGRSMGITMPSSIAQLQLIRSTYASVGLNPADHLEDRCQFFEAHGTGTQAGDPQEATAIYNAFYGDSTLPEKSIKEPLYVGSIKTLIGHTEGVAGLAGVIKASLCVQKGIIPSNMLLERINPVIAPL…
Alternaria_alstroemeriae_LH_A124_GCA_037044435.1	g7315	KS-AT-DH-MT-KR-xCP	MTRTEPIAIIGTGCRFPGSASSPSRLWELLENPRDVASKPPPDRFNSDAFYQAGKARPGMMVAPEAYFLQEDIRAFDAPFFKVSPAEAASMDPQQRLLMEVVYEALERSGLPLQHLQGSYTGVYCGSMSNDYQSLINADLNMLRPFSVTGTTASILANRISYFFDWHGPSFVLDTACSSSLVALHLAAEALHNGDCSLAVVVGSNLILSPDPFIGESQMHMMSPTGRCHMWDAQGDGYARGEGVAALVLKRLQDAVADADPIECVIRSTGVNSDGHTEALTLPNGEAQRELIRSTYARAGLNPLRREDRCQFFEAHGTGTQAGDPQEAFGISSAFFDDGSHPDDFIYVGSIKSVTGHAEGTAGIAGVLKASLAIQHGVIPPNLPFNRLNPLVAPYTSHL…
Alternaria_alstroemeriae_LH_A124_GCA_037044435.1	g8457	KS-AT-DH-MT-KR-xCP-C-A-xCP	MDTSKEPIAIVGSACRFPGGCDTPSKLWEMLKQQRDVLQKIPKDRFNTDPFYHPEPTHHGTSNAQFSYLLEQDIGEFDAKFFNILPKEAECIDPQQRLLMETVYDGITAAGLPMEKLRGSNTAVYVGQMCDDWPGMLQTQLDESPPYMATGSSRSIVANRVSYFFDWHGPCMNIDTACSSSLVAIHEAVQTLRSGQSGIAVAAGVNILISPMYYISESNLRMLSSEGRCRMWDAAGDGYGRGEGIACVVLKTLSQAQRDNDHIECIIRETGVNQDGRTSGITMPSNIAQAQLIRDTYRRAGLDVHNPLDQPQFFHAHGTGTKAGDPQEATAIYHAFFTKETEPEQKLLVGSIKTHIGHTEGAAGLASVISTSLALQHGQVPPNMHFNELNPDILPFYGA…
Alternaria_alstroemeriae_LH_A124_GCA_037044435.1	g2353	KS-AT-DH-MT-KR-xCP-C-A-xCP-Red	MGSTLDRLEPVAIIGSACRFPGGVASPSQLWELLENPIELVRELPDDRFSADTFYHPKAQSPGHTNVKKAYTLTQDVRKFDASFFNISPAEAKAMDPQQRMLLEVTYEGLERAGVTIESLKGSDTGVFVGMMWNDYLTMQAQDNFNSPTYIGTGTARSIVANRLSYFFDWHGPSFTLDTACSSSLVAVHQAVRAIREGDCEVAVVAGVNLILGPENFVQESQLKMLSSDGRCKMWDRDADGYGRGEGVAVLVLKRLGAATMHRDPIECKIRNIEINHDGSKAGLTKPNSAAQADLIRKTYHKAGLDIHNPQDRCQFFEAHGTGTAAGDPAEAEAIYQAFSLEKQAWSDNHMYVGSIKTVIGHTESTAGIAGIMKASLSMQNGRIAPNLHLHNINPAISP…
Alternaria_alstroemeriae_LH_A124_GCA_037044435.1	g7434	KS-AT-DH-MT-KR-xCP-C-A-xCP-Red	MSASKNEPIAIVGSACRFPGDATSPSKLWELLKEPREVARPIDRFAASSFYHQDGHYHGASNVRDAYLLSEDPRYFDAQFFNIPPGEADSIDPQQRTVLETVYEAVESSGLVLEDMRGSDTAVYVGVMCDDYGNICYVDQEAVPTYAATGTARSILSNRVSFTFDWRGPSMTIDTACSSSLVAIHQSVQVLRSGNSNIAVAAGANLIFSPNMFIAESNLNMLSPTGKSQMWDANANGYARGEGIAAVIMKRLSDAIRDGDHIECVIRETGCNQDGHTPGITMPSQEAQTKLIHDTYRRAGLDLSKPEDRPQYFEAHGTGTKAGDGVESKAIYHAFFPEGQTTDESLWVGSIKTIIGHTEGTAGIAGVMKASLAIQNKTIPPNLHLKTLNPEIIPYYGKL…
Alternaria_alstroemeriae_LH_A124_GCA_037044435.1	g1166	KS-AT-DH-xCP-MT	MTAAIDPIQASAAFFNPQSRAPDPADLSALYIFLSKHPHGKTLLHHVASLTDVLHLFADHREDVRNLPNAENYVRLLIDWANGGPSAPVSEARTGIIALPLLLILQLGEYLRYLDFHGISHADFIAQIQKGGGIHGCCAGEPPALSIACAKDEGQIMDNAAVFLRIMVGMGAYIEALDDWTTSESNILAVRLKYEGQEEEFTKMFPRVSPKMLANLERKAQPRTLSFIGNAKSIAAMYEYCRENGLPADKMDVTGKAHNPENEHVVPEFMDILNRNSSMLQLPQQSRLQVTVRSSITGKALTDAEIMEDMITMMLASCCDWYGLVSQVALDLKASERPAHRLVIFGLNDSVPLSPFNKQRLKTFKFKANQLLVSDPQPNSSTAFPSKLPEFPDSTIAIV…
Alternaria_alstroemeriae_LH_A124_GCA_037044435.1	g6940	KS-AT-xCP-MT-Red	MVSTPTISRQRPGSACEECRRRKVRCDRRRPQCQVCFETGIECKINTTRLPRGPRKGQLRTLRTRIAALERCLADQHPEINHQMASIFDGTVIDCDSEEDPLRDLPPLPDSISGTMPDQSSEDRRTGTRSPRSPESPNRPSSLVSDLMRADLDQLYFDRVHPFAPILQRWRYHTWAKQPKKTEAQTCLQYAMWTLAASMSAQFQPLRDRLYAETRRMLDSLDLQGPPTDTAPGIEPAQAWILVCIYEYMQQSPLQAWMSTGRCCRLVLGMRLYELDDPNSPVTMAREHETVLVDWIGLEEQRRTFWMAYSLDRFISFHNGLPFTLDEQLITTRLPCPEEDFQAGQPTLTSYLSDVMSPSAPTSPIPTATTMPSPTVFGRSSHSQILHPHPPPPTPTATP…
Alternaria_alstroemeriae_LH_A124_GCA_037044435.1	g2359	SAT-KS-AT-PT-xCP	MSAPTKLVFFGNEFPNDDLKTLFRGLHRHSKDRRFRQLATFLEESTRVLQNEVAQLPEPLKKLVPHFENLMPLTEVDFRQGPLGAAMESALLTILELGMFIGHYEAEERAWDLSADRTTLAGLSIGLLAAAGVALSTHLAEVVQNGAECVRVSFRLGVYVHDISRKLEAPQADGSLLSWAHVVTGESASDLQEELSRYNTETGTPELLKVFISAADKTSVSVSGPPSRIRAAFRASQRLRYSKSLALPVYDGLCHAAHLYDEETIHRVLHPDGSVIPTSRPVQLALLSSRSGQPFEATTAAELFRAISTELLTGTIFLDNITAGILDRTERCADTTKCQIETYRTSLVFKGLLKALEACFPDRTISTTDLIPWVFQDYGARQPKSCADSKLAIVGMACR…
Alternaria_alstroemeriae_LH_A124_GCA_037044435.1	g4563	SAT-KS-AT-PT-xCP-xCP-Te	MSKMETVAEVFIFGDQTVAFESTLHSLLHVKDNAVLTDFFDRVGYQLRRYVGNLPLHQQEWFPYFTTLIDLLAQHENCHAAPALKLPLLCATELGQFIRHYGQAGRTYPAPESTFLIGACTGAFAAAAVATSQTLAELVPAAVEAVTVAFRTALRSLILRNDLELNIDGSQKSWSAIVGVCEPEAASAIRCFNVEKGLPPIARLYLSSVSRTNVSISGPPRLLGQFLLSCAWKHSLLPIELPYHASHLFRKDDVEIIVGDFHDFSLLKYTQRTKVICAVSGEVVVASDLRSLLHRAVQEALCEPLQWNCIAASLSRELKQCQLTECVINQVSTRSGSLISSALSQEAFLGVKIVQSIGDVAVSPALSSPTGKFSQSSIAIIGFSGRFPESDSNEEFWEM…
Alternaria_alstroemeriae_LH_A124_GCA_037044435.1	g8771	SAT-KS-AT-PT-xCP-xCP-Te	MEGPSRVYLFGDQTSDIEAGLRRLLQAKNSTIVQSFFQQCFHAIRQEIAKLPPSQRKLFPRFTSIVDLLSRSRESGPSPVLESALTCIYQLGCFIHFYGDLGHDYPTPSNSHLVGLCTGVLSCTAVSCAKNVGELIPAAVEAIVIALRLGICVFRVRELVASADSESTCWSALVSGISEAEASRLIDEYSSKKATPPSSKPYISAVSSNGVTVSAPPTILDEFVETCISKNYKPVKAPIHGPYHAPHLYDDKDIERILHQSSALEELTGWSPAIPVISSNTGKPIKATSIKDLFKVALEEILLRRLCWDKVTESCTSVCKTCKNHSCKLFPISSSATQSLFTVLKKAGVSISLETGVGEIAINPETRNLTGKAENSKIAIIGMSGRFPESDGTEAFWDL…
Alternaria_alternarina_TB_1129_GCA_036971565.1	g3850	KS-AT-DH-ER-KR-xCP	MNDFVDPEGTFMPASSPNGLVPIAIVGFGFKFPQDITNAESLWKLLMERRSTMTEIPQNRWNIEGFYKEHGHRPGTVKNRGGHFLADDPARFDAPFFSVQPAEAECMDPQQRLLLETSYHALENAGIPMKAAMGTRTSVHVGCLLQEYSQISQRDSQMPGDYRIVGSSGLAMLANRLSWFYDFSGPSMTVDTACSGGLVAFHLACQELSAGSVDMSLVCGNNLCLLPDSTALLSSLNMMSKDSVCYSFDERASGYARGEGFGVLILKRLDTAIADGDTIRGVVRSTGCGQDGNTPSITSPSQSAQERLIRETYARAGLDLGDTRYFEAHGTGTPVGDPCEAAAISNVFSCRTPEDPIFVGALKSNMGHPEGASGIAGVIKTLLVLEKGIIPPNVYPERI…
Alternaria_alternarina_TB_1129_GCA_036971565.1	g10310	KS-AT-DH-MT-ER-KR-xCP	MTTDRTTPIAIIGMNMKFPGDAVSAQAFWELLMSARNVSKEIPSDRFNIDAFYHPDPNRLDSLRIRHAHFMEEDPRSFDAPFFNMSYAEASVLDPQQRGLLEGAYRTFENAGIPMETLSRSPTSVYCASFSRDGETITGRDFAAQSRYHATANGSSMLSNRVSHFFDLAGPSLTVDTACSSGLYALHLGVQSILAGESAMSLVCGANTFITPESQALALSNGGFLSVDGKSYSFDEKANGYARGEGFGFVLLKPLEAAIRDKDVIRAVIRATGANQDGRTPSITQPSQQAQLDLLRDTYRVAGLEVADTDYVEAHGTGTPVGDPIEAAAIGEAFRDGRKSDRPLYVGSVKSNIGHLEGASGMAGVIKAVLALEKAVIPPIAMFEKTNPAIDTEYLQLAF…
Alternaria_alternarina_TB_1129_GCA_036971565.1	g11530	KS-AT-DH-MT-ER-KR-xCP	MASSMKSEPIAIIGMSCRFPGGASEPARLWDVLSSGQSAWSEVPKGRFNMEAFHLKGDPHSSTTNTPGGHFLDSDVATFDCSFFEIKPTEARAMDPQQRLTLELAYEAFENAGFTVSQIWGSSTGVYIGQWSSDYSEIMARDPENQELYHTLGTGAAITSNRVSFFFNLRGPSFTVDTGCSASLVALHNAVQSLRSGESTMSLVGGVNVLLDPQRFTYQSKLKMFSPDGRSFSFDERANGYGRGEGCGCVILKSLSLAIKDGNAIRAVIRNSALNQDGRTPQGISVPNGEAQEELIRSAYAEAGLVPAETDYVEAHGTGTAVGDPIEAKAIANVLARPREATQGPLIMGSVKGNIGHTESAAGIAGLIKSVLMLENQAVAPQVNYEKPNPKIPLHSWNL…
Alternaria_alternarina_TB_1129_GCA_036971565.1	g1284	KS-AT-DH-MT-ER-KR-xCP	MNKPVAIIGIAFRGPGDARDPEAFYRMLVEGRNARTKIPKDRYNVDAFYHPDAERLGSIQQRHAHFLQQDFKVFDAPFFSITPKEAKAMDPTHRILLEATYEGFENAGLSLEKVSGTQTSCYIGTFTADFPNLQARDNEGPSIYHATGMSASLASNRLSWFYNLRGPSLTVDTACSSSLTAFHLACQSIRTGEAEMSVVGGANLMFGPDMSILLGAAKILSPEGKSKMWDANANGFARGEGFGVTILKPLDAALRDGDNIRAVVLATAANEDGHTPGISLPNSEAQQELIRRAYQMAGVDPAETGYVEAHGTGTQAGDPLEARAILNTVGSVEGRRSDLYVGSVKTNIGHLEGAAGVAGIIKAALIVERGMIPPNLWFEKLNPEIDLPENVKIASKLTP…
Alternaria_alternarina_TB_1129_GCA_036971565.1	g2493	KS-AT-DH-MT-ER-KR-xCP	MEPIAIVGLAFKLPQDIDDEASFWHILEQGQSMMTEWPKSRVDVNAFARSPEASLNTLTSTRGHFLRQNLASFDAPFFSISSKEASAMDPQQRMLLETSYHALENAGIPLSSIAGTETGVFVGTMESDYHRMISKDPDDAPMTTATGISVSIMANRLSWYFDLKGPSMQLNTACSSSMIAVDLGCQSILSGQTSTVLVAGSSLMLDPEYSLYLSNMNMLSPDGICHSFDDRANGYSRGEGVIVMILKKLSTAISDGDNIRAVIRGTGSNQDGRTPGITQPSSVSQENLIRHTYRTCNLGFESTRYIEAHGTGTQIGDAMEMRALGAVFRTARSPKAPLFVGSVKTNIGHLEGGSGLAGIAKSILILEKGFIPPNALFERLNTKVNAKRNNIQVPESCIR…
Alternaria_alternarina_TB_1129_GCA_036971565.1	g9536	KS-AT-DH-MT-ER-KR-xCP	MLYQSTNGTNGINGFHDRNGDNNVHGTNGHRSGDVQSTNSDDMSNSIAIVGISCKFGGAASNLDGLWHTLANGESCWSPIPKSRFDVSNTYHPDPLRTDSLHVKGGFFIDEDLTKFDAPFFNLTADAAKAMDPQLRLLLEGVYQATEDAGIPTEKLSGSNTSVFSANFGRDYTEMLMKDAEALPTSLVTGNGPAMFANRVSHFYNLRGPSVTVDTGCSGGLVALHMGVNSIRNRESDVSIVGASNAILNQDFFIAISNLGLLHEDGQCYSMDHRWGGYGRGEGMAVLVLKKFSAAVKDGDHIHAVIRESAVNQDGRTGTITSPSMDAQRSLIQQCYSRAGIDLASTGYVEAHLTGTGGDAIEAEALARTFGKSREACDPVWVGSVKSNIGHTEPVSGLA…
Alternaria_alternarina_TB_1129_GCA_036971565.1	g2457	KS-AT-DH-MT-KR-xCP-C-A-xCP-Red	MSNLEPIAIVGSACRFPGDSDTPSKLWQLIKSPRDLLRQVPEERFDAEAFYHPDSKHHGTTNAIKSYFLDEDPALFDNGFFNIPQGEAEAVDPQQRLLMETVYDSLCAAGQTIEELRGSSTAVYVGLMCDDWAGILAQDPDVLPQYGATGMARSIMSNRISYFFDWHGPSMTIDTACSSSLVAVHQAIQTLRSGESQVAIAAGANLILTPGMYIAESKLSMLSPSGRSRMWDKDVDGYARGEGIAAVVLKPLSAAIRDNDHIECLIRGTGVNQDGRTNGITMPSATAQAALIRDTYARAGLDVNKPEDRPQFFHAHGTGTAAGDPQEAEAISKAFYSTNDCDETLYVGSIKTVIGHTEGTAGLASLISTSLALQHKVIPPNMHFNTLNPRLKPFYDHLE…
Alternaria_alternarina_TB_1129_GCA_036971565.1	g2928	SAT-KS-AT-PT-xCP	MIRAKVLYFSGEIPQGDPEGDQRDLFRKLHLLSKERSYPILALFLETITRAVKEEQRRLIRTERDSIPAFESILDLTDHVVELRKTSLGGAVERVLVLAFQLGSFIAYHEAHPLEYNFQSSDTFLIARGPGMLSAAAIALCPNVSMVPSIAGDIAKVAFRFGLVVDQVCRSLEISPDEINAAGAWIYCVYGVDPSEAEEAVALFNAEKEYAETSAASVFNDDGKSVSIGGPPSTLKTLFTECEFFKRTRNVPMKKVQGMWHTGKVYGTEHVRQVVPHIDEKHRLHLSLFSPVTGQPFKAANANELLEQIMEEMLTQRIRWDRTIQSVTEQLKQVSPNSTQLIAIQPSQYVESLLAQWKADIPTATHTAEDMMSAIMNLPLGSSPAKDAKSSKVAVVGMA…
Alternaria_alternarina_TB_1129_GCA_036971565.1	g8498	SAT-KS-AT-PT-xCP-xCP-Te	MNVLIFGDQTADQYPLLRKACTWKNNSTLTTFLDRVSQVVREEVQKLPRTQRDQIPNFLTTWDLIEAYYAKGLKIPQLESCMVTIAQLAHFIGYYAENPSDLQNPANTRVVGLCTGLLAGSVVASARSLSELLPLATEAVRIAFRTGTVVGAAKEAVEQASAPKETWSTIVTNMTEKAAKDAIAAFHEEQQTPTLAQAYISAVSTMALTISGPPATTKRLLQGDAFKGCARVAIPVYAPYHAAHFYSPADIDQILDKDAIRHLQQFRPLSLVHSATTGKCHTATSTLDLIRSALTEILVEPVRWDNLLTEVVSQVTATSSQDCSVSAIGVTTITNSLVSALRNGGQSSVTARDHTTWVAAEHDSRGRTQNDKIAIVGMSGRFPGAANPDALWDLLEKGL…
Alternaria_alternata_Altal1_GCA_023079285.1	g9363	KS-AT-DH-ER-KR-xCP	MNDFVDPEGTFMPASSPNGLVPIAIVGFGFKFPQDITNAESLWKLLMERRSTMTEIPQNRWNIEGFYKEHGHRPGTVKNRGGHFLADDPARFDAPFFSVQPAEAECMDPQQRLLLETSYHALENAGIPMKAAMGTRTSVHVGCLLQEYSQISQRDSQMPGDYRIVGSSGLAMLANRLSWFYDFSGPSMTVDTACSGGLVAFHLACQELSAGSVDMSLVCGNNLCLLPDSTALLSSLNMMSKDSVCYSFDERASGYARGEGFGVLILKRLDTAIADGDTIRGVVRSTGCGQDGNTPSITSPSQSAQERLIRETYARAGLDLGDTRYFEAHGTGTPVGDPCEAAAISNVFSCRTPEDPIFVGALKSNMGHPEGASGIAGVIKTLLVLEKGIIPPNVYPERI…
Alternaria_alternata_Altal1_GCA_023079285.1	g2544	KS-AT-DH-MT-ER-KR-xCP	MEPIAIVGLAFKLPQDIEDEASFWRILEQGQSVMTEWPKSRVDVNAFARSPEAALNTLTSTRGHFLKQNLASFDAPFFSISSKEASAMDPQQRMLLETSYHALENAGIPLSRIAGTETGVFVGTMESDYHRTISKDPDDAPLTTATGISVSIMANRLSWYFDLKGPSMQLNTACSSSMIAVDLGCQSIRSGQSSTVLVAGSSLMLDPEYSLYLSNMNMLSPDGICHSFDDRANGYSRGEGVIVMILKKLSTAISDGDNIRAIVRGTGSNQDGRTPGITQPSSVSQENLIRHTYRTCNLGFESTRYIEAHGTGTQIGDAMEMRALGAVFRTARSPRAPLFVGSVKTNIGHLEGGSGLAGIAKSILILEKGFIPPNALFERLNTKVPASCIRWPGEGLRRI…
Alternaria_alternata_Altal1_GCA_023079285.1	g6076	KS-AT-DH-MT-ER-KR-xCP	MNKPVAIIGIAFRGPGDARDPEAFYRMLVEGRNARTKIPKDRYNVDAFYHPDAERLGSIQQRHAHFLQQDFKVFDAPFFSITPKEAKAMDPTHRILLEATYEGFENAGLSLEKVSGTQTSCYIGTFTADFPNLQARDNEGPSIYHATGMSASLASNRLSWFYNLRGPSLTVDTACSSSLTAFHLACQSIRTGEAEMSVVGGANLMFGPDMSILLGAAKILSPEGKSKMWDANANGFARGEGFGVTILKPLDAALRDGDNIRAVVLATAANEDGHTPGISLPNSEAQQELIRRAYQMAGVDPAETGYVEAHGTGTQAGDPLEARAILNTVGSVEGRRSDLYVGSVKTNIGHLEGAAGVAGIIKAALIVERGMIPPNLWFEKLNPEIDLPENVKIASKLTP…
Alternaria_alternata_Altal1_GCA_023079285.1	g7803	KS-AT-DH-MT-ER-KR-xCP	MATDRTTPIAIIGMNMKFPGDAVSSQAFWELLMSARNVSKEIPSDRFNIDAFYHPDPNRLDSLRIRHAHFMEEDPRSFDAPFFNMSYAEASVLDPQQRGLLEGAYRTFENAGIPMETLSRSPTSVYCASFSRDGETITGRDFASQSRYHATANGSSMLSNRVSHFFDLAGPSLTVDTACSSGLYALHLGVQSILAGESAMSLVCGANTFITPESQALALSNGGFLSVDGKSYSFDEKANGYARGEGFGFVLLKPLEAAIRDKDVIRAVIRATGANQDGRTPSITQPSQQAQLDLLRDTYRVAGLDVADTDYVEAHGTGTPVGDPIEAAAIGEAFRDGRKSDRPLYVGSVKSNIGHLEGASGMAGVIKAVLALEKAVIPPIAMFEKTNPAIDTEYLQLAF…
Alternaria_alternata_Altal1_GCA_023079285.1	g9016	KS-AT-DH-MT-ER-KR-xCP	MLYQSTNGTNGINGFHDRNGDNNVHGTNGHRSGDVQSTNSDDMSNSIAIVGISCKFGGAASNLDGLWHTLANGESCWSPIPKSRFDVSNTYHPDPLRTDSLHVKGGFFIDEDLTKFDAPFFNLTADAAKAMDPQLRLLLEGVYQATEDAGIPTEKLSGSNTSVFSASFGRDYTEMLMKDAEALPTSLVTGNGPAMFANRVSHFYNLRGPSVTVDTGCSGGLVALHMGVNSIRNRESDVSIVGASNAILNQDFFIAISNLGLLHEDGQCYSMDHRWGGYGRGEGMAVLVLKKFSAAVKDGDHIHAVIRESAVNQDGRTGTITSPSMDAQRSLIQQCYSRAGIDLASTGYVEAHLTGTGGDAIEAEALARTFGKSREACDPVWVGSVKSNIGHTEPVSGLA…
Alternaria_alternata_Altal1_GCA_023079285.1	g2582	KS-AT-DH-MT-KR-xCP-C-A-xCP-Red	MSNSEPIAIVGSACRFPGDSDTPSKLWQLIKSPRDLLRQVPEERFDAEAFYHPDSKHHGTTNAIKSYFLDEDPALFDNGFFNIPQSEAEAVDPQQRLLMETVYDSLCAAGQTIEELRGSSTAVYVGLMCDDWAGILAQDPDVLPQYGATGMARSIMSNRISYFFDWHGPSMTIDTACSSSLVAVHQAIQTLRSGESQVAIAAGANLILTPGMYIAESKLSMLSPSGRSRMWDKDVDGYARGEGIAAVVLKPLSAAIRDNDHIECLIRGTGVNQDGRTNGITMPSATAQAALIRDTYARAGLDVNKPEDRPQFFHAHGTGTAAGDPQEAEAISKAFYSTNDCDETLYVGSIKTVIGHTEGTAGLASLISTSLALQHKVIPPNMHFNTLNPRLKPFYDHLE…
Alternaria_alternata_Altal1_GCA_023079285.1	g5408	KS-AT-DH-MT-KR-xCP-Red	MNEPIAIIGSGCRFAGGASSPSKLWDLLRDPKDIRSNITDKRFNAEGFYHPDGTHHGHMNVMQSYLLDEDTRVFDAEFFGINPVEARAMDPQQRLLLEVVYESIESAGLSLDRMRGSDTAVFAGLMCGDYEAMMLRDLDQAPTHFATGTSRAVMSNRVSYFFDWRGPSVTIDTACSSSLVAVHQAIQTLRSGDSHTAVACGSNLIFGPEMYVIESKLKMLSPDSLSRMWDKDANGYARGEGVTAVVLKTLSQALADNDRIEAVVRETGVNSDGATPGITMPSANAQRDLIHSVYKKAGLNPLSAEDRPQFIEAHGTGTPAGDPIEAEALSIAFFSNTEKSSSPINTGSIKTVIGHTEGSAGIAALLKVTQAMQNSTIPPNLWFQQLNPKLEPFYGNLQI…
Alternaria_alternata_Altal1_GCA_023079285.1	g15	KS-AT-DH-xCP-xCP-MT	MRSQSSHFAPSVAFFCPQSKAPTEAYLEQLQRYIVETPLLQPFAEAITSLRDTWNTLCKGHADIANLKSGERHVVSLERWMTNGIAGPVSSSMSGILALPLLVVIQICQYFQLLELHKLTHEQMLSSLRNGGGAQGYCGGLPTAFAISCAKDEEDVVRLATKALRLAFAVGAFGELGDDESIEGATTIAVRLRASQQGEELVEGIPGCYISAITDPRTISIVGPVIELMKVADRARDQGLLVTDIHIRGKVHNPENAPLVKVLFDLCQEHDEMTLPDASQLQVPVRSNLNGKLLDNCSLTYEAINTILASRCEWYRLLKEVAQDLAGSGTDSHTFALFGIGDPVPLMPFHNARLRVAKVEAHTAIQEARLAEYKYPEDAIAVTGVSCRLPRANDLEELW…
Alternaria_alternata_Altal1_GCA_023079285.1	g7407	SAT-KS-AT-PT-xCP	MIRAKVLYFSGEIPQGDPEGDQRDLFRKLHLLSKERSYPILALFLETITRAVKEEQRRLIRTERDSIPAFESILDLTDHVVELRKTSLGGAVERVLVLAFQLGSFIAYHEAHPLEYNFQSSDTFLIARGPGMLSAAAIALCPNVSMVPSIAGDIAKVAFRFGLVVDQVCRSLEISPDEINAAGAWIYCVYGVDPSEAEEAVALFNAEKEYAETSAASVFNDDGKSVSIGGPPSTLKTLFTECEFFKRTRNLPMKKVQGMWHTGKVYGTEHVRQVVPHIDEKHRLHLSLFSPVTGQPFKAANANELLEQIMEEMLTQRIRWDRTIQSVTEQLKQVSPNSTQLIAIQPSQYVESLLAQWKADIPTATHTAEDMMSAIMNLPLGSSPAKDAKSSKVAVVGMA…
Alternaria_alternata_Altal1_GCA_023079285.1	g7133	SAT-KS-AT-PT-xCP-xCP-Te	MNVLIFGDQTADQYPLLRKACTWKNNSTLTTFLDRVSQVVREEVQKLPRTQRDQIPNFLTTWDLIEAYYAKGLKIPQLESCMVTIAQLAHFIGYYAENPSDLQNPANTRVVGLCTGLLAGSVVASARSLSELLPLATEAVRIAFRTGTVVGAAKEAVEQASAPKETWSTIVTNMTEKAAKDAIAAFHEEQQTPTLAQAYISAVSTMALTISGPPATTKRLLQGDAFKGCARVAIPVYAPYHAAHFYSPADIDQILDKDAIRHLQQFRPLSLVHSATTGKCHTATSTLDLIRSALTEILVEPVRWDNLLTEVVSQVTATSSQDCSVSAIGVTTITNSLVSALRNGGQSSVTARDHTTWVAAEHDSRGRTQNDKIAIVGMSGRFPGAANPDALWDLLEKGL…
Alternaria_alternata_ATCC_34957_GCA_001443195.1	g5504	KS-AT-DH-ER-KR-xCP	MNDFVDPEGTFMPASSPNGLVPIAIVGFGFKFPQDITNAESLWKLLMERRSTMTEIPQNRWNIEGFYKEHGHRPGTVKNRGGHFLADDPARFDAPFFSVQPAEAECMDPQQRLLLETSYHALENAGIPMKAAMGTRTSVHVGCLLQEYSQISQRDSQMPGDYRIVGSSGLAMLANRLSWFYDFSGPSMTVDTACSGGLVAFHLACQELSAGSVDMSLVCGNNLCLLPDSTALLSSLNMMSKDSVCYSFDERASGYARGEGFGVLILKRLDTAIADGDTIRGVVRSTGCGQDGNTPSITSPSQSAQERLIRETYARAGLDLGDTRYFEAHGTGTPVGDPCEAAAISNVFSCRTPEDPIFVGALKSNMGHPEGASGIAGVIKTLLVLEKGIIPPNVYPERI…
Alternaria_alternata_ATCC_34957_GCA_001443195.1	g10738	KS-AT-DH-MT-ER-KR-xCP	MASSMTSEPIAIIGMSCRFPGGASEPARLWDVLSSGQSAWSEVPKDRFNMEAFHLKGDPHSSTTNTPGGHFLDSDIATFDCSFFEIKPTEARAMDPQQRLTLELAYEAFENAGLTVSQIWGSSTGVYIGQWSSDYSEIMARDPENQELYHTLGTGAAITSNRVSFFFNLRGPSFTVDTGCSASLVALHNAVQSLRSGESTMSLVGGVNVLLDPQRFTYQSKLKMFSPDGRSFSFDERANGYGRGEGCGCVVLKPLSLAIKDGNAIRAVIRNSALNQDGRTPQGISVPNGEAQEELIRRAYAEAGLVSAETDYVEAHGTGTAVGDPIEAKAIANVLARPREATQGPLIMGSVKGNIGHTESAAGIAGLIKSVLMLENQAVAPQVNYEKPNPKIPLHSWNL…
Alternaria_alternata_ATCC_34957_GCA_001443195.1	g4866	KS-AT-DH-MT-ER-KR-xCP	MEPIAIVGLAFKLPQDIEDEASFWHILEQGQSMMTEWPKSRVDVNAFARSPEASLNTLTSTRGHFLKQNLASFDAPFFSISSKEASAMDPQQRMLLETSYHALENAGIPLSRIAGTETGVFVGTMESDYHRTISKDPDDAPMTTATGISVSIMANRLSWYFDLKGPSMQLNTACSSSMIAVDLGCQSIRSGQSSTVLVAGSSLMLDPEYSLYLSNMNMLSPDGICHSFDDRANGYSRGEGVIVMILKKLSTAISDGDNIRAVIRGTGSNQDGQTPGITQPSSVSQENLIRHTYRTCNLGFESTRYIEAHGTGTQIGDAMEMRALGAVFRTARSPRAPLFVGSVKTNIGHLEGGSGLAGIAKSILILEKGFIPPNALFERLNTKVNAKRNNIQVPASCIR…
Alternaria_alternata_ATCC_34957_GCA_001443195.1	g5136	KS-AT-DH-MT-ER-KR-xCP	MLYQSTNGTNGINGFHDRNGDNNVHGTNGHRSGDVQSTNSDDMSNSIAIVGISCKFGGAASNLDGLWHTLANGESCWSPIPKSRFDVSNTYHPDPLRTDSLHVKGGFFIDEDLTKFDAPFFNLTADAAKAMDPQLRLLLEGVYQATEDAGIPTEKLSGSNTSVFSASFGRDYTEMLMKDAEALPTSLVTGNGPAMFANRVSHFYNLRGPSVTVDTGCSGGLVALHMGVNSIRNRESDVSIVGASNAILNQDFFIAISNLGLLHEDGQCYSMDHRWGGYGRGEGMAVLVLKKFSAAVKDGDHIHAVIRESAVNQDGRTGTITSPSMDAQRSLIQQCYSRAGIDLASTGYVEAHLTGTGGDAIEAEALARTFGKSREACDPVWVGSVKSNIGHTEPVSGLA…
Alternaria_alternata_ATCC_34957_GCA_001443195.1	g7647	KS-AT-DH-MT-ER-KR-xCP	MNKPVAIIGIAFRGPGDARDPEAFYRMLVEGRNARTKIPKDRYNVDAFYHPDAERLGSIQQRHAHFLQQDFKVFDAPFFSITPKEAKAMDPTHRILLEATYEGFENAGLSLEKVSGTQTSCYIGTFTADFPNLQARDNEGPSIYHATGMSASLASNRLSWFYNLRGPSLTVDTACSSSLTAFHLACQSIRTGEAEMSVVGGANLMFGPDMSILLGAAKILSPEGKSKMWDANANGFARGEGFGVTILKPLDAALRDGDNIRAVVLATAANEDGHTPGISLPNSEAQQELIRRAYQMAGVDPAETGYVEAHGTGTQAGDPLEARAILNTVGSVEGRRSDLYVGSVKTNIGHLEGAAGVAGIIKAALIVERGMIPPNLWFEKLNPEIDLPENVKIASKLTP…
Alternaria_alternata_ATCC_34957_GCA_001443195.1	g9967	KS-AT-DH-MT-ER-KR-xCP	MATDRTTPIAIIGMNMKFPGDAVSAQAFWELLMSARNVSKEIPSDRFNIDAFYHPDPNRLDSLRIRHAHFMEEDPRSFDAPFFNMSYAEASVLDPQQRGLLEGAYRTFENAGIPMETLSRSPTSVYCASFSRDGETITGRDFAAQSRYHATANGSSMLSNRVSHFFDLAGPSLTVDTACSSGLYALHLGVQSILAGESAMSLVCGANTFITPESQALALSNGGFLSVDGKSYSFDEKANGYARGEGFGFVLLKPLEAAIRDKDVIRAVIRATGANQDGRTPSITQPSQQAQLDLLRDTYRVAGLDVADTDYVEAHGTGTPVGDPIEAAAIGEAFRDGRKSDRPLYVGSVKSNIGHLEGASGMAGVIKAVLALEKAVIPPIAMFEKTNPAIDTEYLQLAF…
Alternaria_alternata_ATCC_34957_GCA_001443195.1	g4827	KS-AT-DH-MT-KR-xCP-C-A-xCP-Red	MSNSEPIAIVGSACRFPGDSDTPSKLWQLIKSPRDLLRQVPEERFDAEAFYHPDSKHHGTTNAIKSYFLDEDPALFDNGFFNIPQSEAEAVDPQQRLLMETVYDSLCAAGQTIEELRGSSTAVYVGLMCDDWAGILAQDPDVLPQYGATGMARSIMSNRISYFFDWHGPSMTIDTACSSSLVAVHQAIQTLRSGESQVAIAAGANLILTPGMYIAESKLSMLSPSGRSRMWDKDVDGYARGEGIAAVVLKPLSAAIRDNDHIECLIRGTGVNQDGRTNGITMPSATAQAALIRDTYARAGLDVNKPEDRPQFFHAHGTGTAAGDPQEAEAISKAFYSTNDCDETLYVGSIKTVIGHTEGTAGLASLISTSLALQHKVIPPNMHFNTLNPRLKPFYDHLE…
Alternaria_alternata_ATCC_34957_GCA_001443195.1	g11549	KS-AT-DH-MT-KR-xCP-Red	MNEPIAIIGSGCRFAGGASSPSKLWDLLRDPKDIRSNITDKRFNAEGFYHPDGTHHGHMNVMQSYLLDEDTRVFDAEFFGINPVEARAMDPQQRLLLEVVYESIESAGLSLDRMRGSDTAVFAGLMCGDYEAMMLRDLDQAPTHFATGTSRAVMSNRVSYFFDWRGPSVTIDTACSSSLVAVHQAIQTLRSGDSHTAVACGSNLIFGPEMYVIESKLKMLSPDSLSRMWDKDANGYARGEGVTAVVLKTLSQALADNDRIEAVVRETGVNSDGATPGITMPSANAQRDLIHSVYKKAGLNPLSAEDRPQFIEAHGTGTPAGDPIEAEALSIAFFSNTEKSSSPINTGSIKTVIGHTEGSAGIAALLKVTQAMQNSTIPPNLWFQQLNPKLEPFYGNLQI…
Alternaria_alternata_ATCC_34957_GCA_001443195.1	g1126	SAT-KS-AT-PT-xCP	MIRAKVLYFSGEIPQGDPEGDQRDLFRKLHLLSKERSYPILALFLETITRAVKEEQRRLIRTERDSIPAFESILDLTDHVVELRKTSLGGAVERVLVLAFQLGSFIAYHEAHPLEYNFQSSDTFLIARGPGMLSAAAIALCPNVSMVPSIAGDIAKVAFRFGLVVDQVCRSLEISPDEINAAGAWIYCVYGVDPSEAEEAVALFNAEKEYAETSAASVFNDDGKSVSIGGPPSTLKTLFTECEFFKRTRNVPMKKVQGMWHTGKVYGTEHVRQVVPHIDEKHRLHLSLFSPVTGQPFKAANANELLEQIMEEMLTQRIRWDRTIQSVTEQLKQVSPNSTQLIAIQPSQYVESLLAQWKADIPTATHTAEDMMSAIMNLPLGSSPAKDAKSSKVAVVGMA…
Alternaria_alternata_ATCC_34957_GCA_001443195.1	g851	SAT-KS-AT-PT-xCP-xCP-Te	MNVLIFGDQTADQYPLLRKACTWKNNSTLTTFLDRVSQVVREEVQKLPRTQRDQIPNFLTTWDLIEAYYAKGLKIPQLESCMVTIAQLAHFIGYYAENPSDLQNPANTRVVGLCTGLLAGSVVASARSLSELLPLATEAVRIAFRTGTVVGAAKEAVEQASAPKETWSTIVTNMTEKAAKDAIAAFHEEQQTPTLAQAYISAVSTMALTISGPPATTKRLLQGDAFKGCARVAIPVYAPYHAAHFYSPADIDQILDKDAIRHLQQFRPLSLVHSATTGKCHTATSTLDLIRSALTEILVEPVRWDNLLTEVVSQVTATSSQDCSVSAIGVTTITNSLVSALRNGGQSSVTARDHTTWVAAEHDSRGRTQNDKIAIVGMSGRFPGAANPDALWDLLEKGL…
Alternaria_angustiovoidea_FKII_L2_CM_DRAB1_GCA_022814545.1	g9189	KS-AT-DH-ER-KR-xCP	MNDFIDPEGTFMSASSHNGVVPIAIVGFGFKFPQDITNAESLWKLLMERRSTMTEIPQNRWNIDGFYKEHGHRPGTVKNRGGHFLADDPARFDAPFFSVQPAEAECMDPQQRLLLETSYHALENAGIPMKAAMGTRTSVHVGCLLQEYSQISQRDSQMPGDYRIVGSSGLAMLANRLSWFYDFSGPSMTVDTACSGGLVAFHLACQELSAGSVDMSLVCGNNLCLLPDSTALLSSLNMMSKDSVCYSFDERASGYARGEGFGVLILKRLDTAIADGDTIRGVVRSTGCGQDGNTPSITSPSQSAQERLIRETYARAGLDLGDTRYFEAHGTGTPVGDPCEAAAISNVFSCRTPEDPIFVGALKSNMGHPEGASGIAGVIKTLLVLEKGIIPPNVYPERI…
Alternaria_angustiovoidea_FKII_L2_CM_DRAB1_GCA_022814545.1	g7769	KS-AT-DH-KR-xCP	MVQVQGAELEFHGVNWTQHDVTTSDDIAIVGLSCRTAGGIDNLDTLWDFLLQKKHASGEIPLNRWEPWRQRSALDAKIVSSITRKGYFLDDVEGFDAAFFGISPREAEHMDPHQRLGLELAYEALQNAGIQPDRLAGSDTAVYIGVDSDDYSRMVMEDLPAIEAWSGIGTAHHGVSNRISYHFDLKGPSAAVDAACASSLVALHLARQAIVSGESTVAICGGVNVICAPGITHMLQKAGALTEKGVCRSFDAAADGYARGEGGAIIVLKRLSAAQEDNDNILAVLKSSASAQDGKTRNIMAPNGAAQADVARQALRRAGNIDPHTVNYVEAHATATRLGDPTEIKAMAEVYGEGRSREKPCYLGSIKPNVGHLEAAAGAISVVKTVLSVQKGVIAPQAL…
Alternaria_angustiovoidea_FKII_L2_CM_DRAB1_GCA_022814545.1	g4860	KS-AT-DH-MT-ER-KR-xCP	MNKPVAIIGIAFRGPGDARDPEAFYRMLVEGRNARTKIPKDRYNVDAFYHPDAERLGSIQQRHAHFLQQDFKVFDAPFFSITPKEAKAMDPTHRILLEATYEGFENAGLSLEKVSGTQTSCYIGTFTADFPNLQARDNEGPSIYHATGMSASLASNRLSWFYNLRGPSLTVDTACSSSLTAFHLACQSIRTGEAEMSVVGGANLMFGPDMSILLGAAKILSPEGKSKMWDANANGFARGEGFGVTILKPLDAALRDGDNIRAVVLATAANEDGHTPGISLPNSEAQQELIRRAYQMAGVDPAETGYVEAHGTGTQAGDPLEARAILNTVGSVEGRRSDLYVGSVKTNIGHLEGAAGVAGIIKAALIVERGMIPPNLWFEKLNPEIDLPENVKIASKLTP…
Alternaria_angustiovoidea_FKII_L2_CM_DRAB1_GCA_022814545.1	g6708	KS-AT-DH-MT-ER-KR-xCP	MKSEPIAIIGMSCRFPGGASEPARLWDVLSSGQSAWSEVPKDRFNMEAFHLKGDPHSSTTNTPGGHFLDSDVATFDCSFFEIKPTEARAMDPQQRLTLELAYEAFENAGFTVSQIWGSSTGVYIGQWSSDYSEIMARDPENQELYHTLGTGAAITSNRVSFFFNLRGPSFTVDTGCSASLVALHNAVQSLRSGESTMSLVGGVNVLLDPQRFTYQSKLKMFSPDGRSFSFDERANGYGRGEGCGCVVLKPLSLAIKDGNAIRAVIRNSALNQDGRTPQGISVPNGEAQEELIRRAYAEAGLVPAETDYVEAHGTGTAVGDPIEAKAIANVLARPREATQGPLIMGSVKGNIGHTESAAGIAGLIKSVLMLENQAVAPQVNYEKPNPKIPLHSWNLKIPT…
Alternaria_angustiovoidea_FKII_L2_CM_DRAB1_GCA_022814545.1	g7483	KS-AT-DH-MT-ER-KR-xCP	MATDRTTPIAIIGMNMKFPGDAVSAQAFWELLMSARNVSKEIPSDRFNIDAFYHPDPNRLDSLRIRHAHFMEEDPRSFDAPFFNMSYAEASVLDPQQRGLLEGAYRTFENAGIPMETLSRSPTSVYCASFSRDGETITGRDFAAQSRYHATANGSSMLSNRVSHFFDLAGPSLTVDTACSSGLYALHLGVQSILAGESAMSLVCGANTFITPESQALALSNGGFLSVDGKSYSFDEKANGYARGEGFGFVLLKPLEAAIRDKDVIRAVIRATGANQDGRTPSITQPSQQAQLDLLRDTYRVAGLDVADTDYVEAHGTGTPVGDPIEAAAIGEAFRDGRKPDRPLYVGSVKSNIGHLEGASGMAGVIKAVLALEKAVIPPIAMFEKTNPAVDTEYLQLAF…
Alternaria_angustiovoidea_FKII_L2_CM_DRAB1_GCA_022814545.1	g9744	KS-AT-DH-MT-ER-KR-xCP	MEPIAIVGLAFKLPQDVEDEASLWRILEQGQSVMTEWPKSRVDVNAFARSPEASLNTLTSTRGHFLKQNLASFDAPFFSISSKEASAMDPQQRMLLETSYHALENAGIPLSRIAGTETGVFVGTMESDYHRTISKDPDEAPLTTATGISVSIMANRLSWYFDLKGPSMQLNTACSSSMIAVDLGCQSIRSGQSSTVLVAGSSLMLDPEYSLYLSNMNMLSPDGICHSFDDRANGYSRGEGVIVMILKKLSTAISDGDNIRAVIRGTGSNQDGRTPGITQPSSVSQENLIRHTYRTCNLGFESTRYIEAHGTGTQIGDAMEMRALGAVFRTARSPRAPLFVGSVKTNIGHLEGGSGLAGIAKSILILEKGFIPPNALFERLNTKVNAKRNNIEVPASCIR…
Alternaria_angustiovoidea_FKII_L2_CM_DRAB1_GCA_022814545.1	g9704	KS-AT-DH-MT-KR-xCP-C-A-xCP-Red	MSNLEPIAIVGSACRFPGDSDTPSKLWQLIKSPRDLLRQVPEERFDAEAFYHPDSKHHGTTNAIKSYFLDEDPALFDNGFFNIPQSEAEAVDPQQRLLMETVYDSLCAAGQTIEELRGSSTAVYVGLMCDDWAGILAQDPDVLPQYGATGMARSIMSNRISYFFDWHGPSMTIDTACSSSLVAVHQAIQTLRSGESQVAIAAGANLILTPGMYIAESKLSMLSPSGRSRMWDKDVDGYARGEGIAAVVLKPLSAAIRDNDHIECLIRGTGVNQDGRTNGITMPSATAQAALIRDTYARAGLDVNKPEDRPQFFHAHGTGTAAGDPQEAEAISKAFYSTNDCDETLYVGSIKTVIGHTEGTAGLASLISTSLALQHKVIPPNMHFNTLNPRLKPFYDHLE…
Alternaria_angustiovoidea_FKII_L2_CM_DRAB1_GCA_022814545.1	g5774	KS-AT-DH-MT-KR-xCP-Red	MNEPIAIIGSGCRFAGGASSPSKLWDLLRDPKDIRSNITDKRFNAEGFYHPDGTHHGHMNVMQSYLLDEDTRVFDAEFFGINPVEARAMDPQQRLLLEVVYESIESAGLSLDRMRGSDTAVFAGLMCGDYEAMMLRDLDQAPTHFATGTSRAVMSNRVSYFFDWRGPSVTIDTACSSSLVAVHQAIQTLRSGDSHTAVACGSNLIFGPEMYVIESKLKMLSPDSLSRMWDKDANGYARGEGVTAVVLKTLSQALADNDRIEAVVRETGVNSDGATPGITMPSANAQRDLIHSVYKKAGLNPLSAEDRPQFIEAHGTGTPAGDPIEAEALSIAFFSNTEKSSSPINTGSIKTVIGHTEGSAGIAALLKVTQAMQNSTIPPNLWFQQLNPKLEPFYGNLQI…
Alternaria_angustiovoidea_FKII_L2_CM_DRAB1_GCA_022814545.1	g5656	KS-AT-DH-xCP-xCP-MT	MRSQSSHFAPSVAFFCPQSKAPTEAYLEQLQRDTWNKLCKGHADIANLKSGERHVVSLERWITNGIAGPVSSSMSGILALPLLVVIQICQYFQLLELHKLTHEQMLSSLRNGGGAQGYCGGLLTAFAISCAKDEEDVVRLATKALRLAFAVGAFGELGDDESIEGATTIAVRLRASQQGEELVEGIPGCYISAITDPRTISIVGPVIELMKVADRARDQGLLVTNIHIRGKVHNPENAPLVKVLFDLCQEHDEMTLPDASQLRVPVRSNLNGKLLDNCSLTYEAINTILASRCEWYRLLKEVAQDLAGSGTDSHTFVLFGIGDPVPLMPFHNARLRVAKVEAHTAIQEARLAEYKYPEDAIAVTGVSCRLPRANDLEELWQLLAAGTSTCEEIRHDRVP…
Alternaria_angustiovoidea_FKII_L2_CM_DRAB1_GCA_022814545.1	g3332	SAT-KS-AT-PT-xCP	MKRAKVLYFSGEIPQGDPEGDQRDLFRKLHLLSKERSYPILALFLETITRAVKEEQRRLIRTERDLIPAFESILDLTDHVIELRKTSLGGAVERVLVLAFQLGSFIAYHEAHPLEYNFQSSDTFLIARGPGMLSAAAIALCPNVSMVPSISGDIAKVAFRFGLVVDHVCRSLEISPDEINAAGAWIYCVYGVDPSEAQEAVALFNAEKEYAETSVASVFNDDGKSVSIGGPPSTLKALFTECEFFKRTRNVPMKKVQGMWHTGKVYGMEHVQQVVPHIDAKHRLHLSLFSPVTGEPFEAANANELLEQIMEEMLTQRIRWDRTIQSVTERLKQVSPNSTQLIAIQPSQYVESLLAQWKADISTATHTAEDMMSAIMNLPLGSSSAKDAKSSKIAVVGMA…
Alternaria_angustiovoidea_FKII_L2_CM_DRAB1_GCA_022814545.1	g3606	SAT-KS-AT-PT-xCP-xCP-Te	MNVLIFGDQTADQYPLLRKACTWKNNSTLTTFLDRVSQVVREEVQKLPRTQRDQIPNFLTTWDLIEAYYAKGLKIPQLESCMVTIAQLAHFIGYYAENPSDLQNPANTRVVGLCTGLLAGSVVASARSLSELLPLATEAVRIAFRTGTVVGAAKEAVEQASAPKETWSTIVTNMTEKAAKDAIAAFHEEQQTPTLAQAYISAVSTMALTISGPPATTKRLLQGDAFKGCARVAIPVYAPYHAAHFYSPADIDQILDKDAIRHLQQFRPLSLVHSATTGKCHTATSTLDLIRSALTEILVEPVRWDNLLTEVVSQVTATSSQDCSVSAIGVTTITNSLVSALRNGGQSSVTARDHTTWVAAEHDSRGRTQNDKIAIVGMSGRFPGAANPDALWDLLEKGL…
Alternaria_angustiovoidea_FKII_L8_BK_P2B_GCA_022814425.1	g8070	KS-AT-DH-ER-KR-xCP	MNDFIDPEGTFMSASSHNGVVPIAIVGFGFKFPQDITNAESLWKLLMERRSTMTEIPQNRWNIDGFYKEHGHRPGTVKNRGGHFLADDPARFDAPFFSVQPAEAECMDPQQRLLLETSYHALENAGIPMKAAMGTRTSVHVGCLLQEYSQISQRDSQMPGDYRIVGSSGLAMLANRLSWFYDFSGPSMTVDTACSGGLVAFHLACQELSAGSVDMSLVCGNNLCLLPDSTALLSSLNMMSKDSVCYSFDERASGYARGEGFGVLILKRLDTAIADGDTIRGVVRSTGCGQDGNTPSITSPSQSAQERLIRETYARAGLDLGDTRYFEAHGTGTPVGDPCEAAAISNVFSCRTPEDPIFVGALKSNMGHPEGASGIAGVIKTLLVLEKGIIPPNVYPERI…
Alternaria_angustiovoidea_FKII_L8_BK_P2B_GCA_022814425.1	g10737	KS-AT-DH-MT-ER-KR-xCP	MEPIAIVGLAFKLPQDIDDEASFWHILEQGQSMMTEWPKSRVDVNAFARSPEASLNTLTSTRGHFLRQNLASFDAPFFSISSKEASAMDPQQRMLLETSYHALENAGIPLSSIAGTETGVFVGTMESDYHRMISKDPDDAPMTTATGISVSIMANRLSWYFDLKGPSMQLNTACSSSMIAVDLGCQSILSGQTSTVLVAGSSLMLDPEYSLYLSNMNMLSPDGICHSFDDRANGYSRGEGVIVMILKKLSTAISDGDNIRAVIRGTGSNQDGRTPGITQPSSVSQENLIRHTYRTCNLGFESTRYIEAHGTGTQIGDAMEMRALGAVFRTARSPKAPLFVGSVKTNIGHLEGGSGLAGIAKSILILEKGFIPPNALFERLNTKVNAKRNNIQVPESCVR…
Alternaria_angustiovoidea_FKII_L8_BK_P2B_GCA_022814425.1	g1528	KS-AT-DH-MT-ER-KR-xCP	MLYQSTNGTNGINGFHDRNGDNNVHGTNGHRSGDVQSTNSDDMSNSIAIVGISCKFGGAASNLDGLWHTLANGESCWSPIPKSRFDVSNTYHPDPLRTDSLHVKGGFFIDEDLTKFDAPFFNLTADAAKAMDPQLRLLLEGVYQATEDAGIPTEKLSGSNTSVFSASFGRDYTEMLMKDAEALPTSLVTGNGPAMFANRVSHFYNLRGPSVTVDTGCSGGLVALHMGVNSIRNRESDVSIVGASNAILNQDFFIAISNLGLLHEDGQCYSMDHRWGGYGRGEGMAVLVLKKFSAAVKDGDHIHAVIRESAVNQDGRTGTITSPSMDAQRSLIQQCYSRAGIDLASTGYVEAHLTGTGGDAIEAEALARTFGKSREACDPVWVGSVKSNIGHTEPVSGLA…
Alternaria_angustiovoidea_FKII_L8_BK_P2B_GCA_022814425.1	g4968	KS-AT-DH-MT-ER-KR-xCP	MATDRTTPIAIIGMNMKFPGDAVSAQAFWELLMSARNVSKEIPSDRFNIDAFYHPDPNRLDSLRIRHAHFMEEDPRSFDAPFFNMSYAEASVLDPQQRGLLEGAYRTFENAGIPMETLSRSPTSVYCASFSRDGETITGRDFAAQSRYHATANGSSMLSNRVSHFFDLAGPSLTVDTACSSGLYALHLGVQSILAGESAMSLVCGANTFITPESQALALSNGGFLSVDGKSYSFDEKANGYARGEGFGFVLLKPLEAAIRDKDVIRAVIRATGANQDGRTPSITQPSQQAQLDLLRDTYRVAGLDVADTDYVEAHGTGTPVGDPIEAAAIGEAFRDGRKPDRPLYVGSVKSNIGHLEGASGMAGVIKAVLALEKAVIPPIAMFEKTNPAVDTEYLQLAF…
Alternaria_angustiovoidea_FKII_L8_BK_P2B_GCA_022814425.1	g6411	KS-AT-DH-MT-ER-KR-xCP	MNKPVAIIGIAFRGPGDARDPEAFYRMLVEGRNARTKIPKDRYNVDAFYHPDAERLGSIQQRHAHFLQQDFKVFDAPFFSITPKEAKAMDPTHRILLEATYEGFENAGLSLEKVSGTQTSCYIGTFTADFPNLQARDNEGPSIYHATGMSASLASNRLSWFYNLRGPSLTVDTACSSSLTAFHLACQSIRTGEAEMSVVGGANLMFGPDMSILLGAAKILSPEGKSKMWDANANGFARGEGFGVTILKPLDAALRDGDNIRAVVLATAANEDGHTPGISLPNSEAQQELIRRAYQMAGVDPAETGYVEAHGTGTQAGDPLEARAILNTVGSVEGRRSDLYVGSVKTNIGHLEGAAGVAGIIKAALIVERGMIPPNLWFEKLNPEIDLPENVKIASKLTP…
Alternaria_angustiovoidea_FKII_L8_BK_P2B_GCA_022814425.1	g10777	KS-AT-DH-MT-KR-xCP-C-A-xCP-Red	MSNSEPIAIVGSACRFPGDSDTPSKLWQLIKSPRDLLRQVPEERFDAEAFYHPDSKHHGTTNAIKSYFLDEDPALFDNGFFNIPQSEAEAVDPQQRLLMETVYDSLCAAGQTIEELRGSSTAVYVGLMCDDWAGILAQDPDVLPQYGATGMARSIMSNRISYFFDWHGPSMTIDTACSSSLVAVHQAIQTLRSGESQVAIAAGANLILTPGMYIAESKLSMLSPSGRSRMWDKDVDGYARGEGIAAVVLKPLSAAIRDNDHIECLIRGTGVNQDGRTNGITMPSATAQAALIRDTYARAGLDVNKPEDRPQFFHAHGTGTAAGDPQEAEAISKAFYSTNDCDETLYVGSIKTVIGHTEGTAGLASLISTSLALQHKVIPPNMHFNTLNPRLKPFYDHLE…
Alternaria_angustiovoidea_FKII_L8_BK_P2B_GCA_022814425.1	g7090	KS-AT-DH-MT-KR-xCP-Red	MRSDLGAEQSVKVEIVKPWTDQVNYSYLTQVQIRYQSPIQHPFIDVLSAETLSTQPLFQQLQLCYPLPSHPSASVPLLFKTSLMSPNAPINEPIAIIGSGCRFAGGASSPSKLWDLLRDPRDIRSNITDKRFNAEGFYHPDGTHHGHMNVMQSYLLDEDTRVFDAEFFGINPVEAKAMDPQQRLLLEVVYESIESAGLSLDRMRGSDTAVFAGLMCGDYEAMMLRDLDQAPTHFATGTSRAVMSNRVSYFFDWRGPSVTIDTACSSSLVAVHQAIQTLRSGDSHTAVACGSNLIFGPEMYVIESKLKMLSPDSLSRMWDKDANGYARGEGVTAVVLKTLSQALADNDRIEAVVRETGVNSDGATPGITMPSASAQRDLIHSVYKKAGLDPQCAEDRPQF…
Alternaria_angustiovoidea_FKII_L8_BK_P2B_GCA_022814425.1	g2717	KS-AT-DH-xCP-xCP-MT	MRSQSSHFAPSVAFFCPQSKAPTEAYLEQLQRDTWNKLCKGHADIANLKSGERHVVSLERWITNGIAGPVSSSMSGILALPLLVVIQICQYFQLLELHKLTHEQMLSSLRNGGGAQGYCGGLPTAFAISCAKDEEDVVRLATKALRLAFAVGAFGELGDDESIEGATTIAVRLRASQQGEELVEGIPGCYISAITDPRTISIVGPVIELMKVADRARDQGLLVTNIHIRGKVHNPENAPLVKVLFDLCQEHDEMTLPDASQLRVPVRSNLNGKLLDNCSLTHEAINTILASRCEWYRLLKEVAQDLAGSGTDSHTFVLFGIGDPVPLMPFHNARLRVAKVEAHTAIQEARLAEYKYPEDAIAVTGVSCRLPRANDLEELWQLLAAGTSTCEEIRHDRVP…
Alternaria_angustiovoidea_FKII_L8_BK_P2B_GCA_022814425.1	g3150	SAT-KS-AT-PT-xCP	MIRAKVLYFSGEIPQGDPEGDQRDLFRKLHLLSKERSYPILALFLETITRAVKEEQRRLIRTERDSIPAFESILDLTDHVVELRKTSLGGAVERVLVLAFQLGSFIAYHEAHPLEYNFQSSDTFLIARGPGMLSAAAIALCPNVSMVPSIAGDIAKVAFRFGLVVDQVCRSLEISPDEINAAGAWIYCVYGVDPSEAEEAVALFNAEKEYAETSAASVFNDDGKSVSIGGPPSTLKTLFTECEFFKRTRNVPMKKVQGMWHTGKVYGTEHVRQVVPHIDEKHRLHLSLFSPVTGQPFKAANANELLEQIMEEMLTQRIRWDRTIQSVTEQLKQVSPNSTQLIAIQPSQYVESLLAQWKADIPTATHTAEDMMSAIMNLPLGSSPAKDAKSSKVAVVGMA…
Alternaria_angustiovoidea_FKII_L8_BK_P2B_GCA_022814425.1	g3423	SAT-KS-AT-PT-xCP-xCP-Te	MNVLIFGDQTADQYPLLRKACTWKNNSTLTTFLDRVSQVVREEVQKLPRTQRDQIPNFLTTWDLIEAYYAKGLKIPQLESCMVTIAQLAHFIGYYAENPSDLQNPANTRVVGLCTGLLAGSVVASARSLSELLPLATEAVRIAFRTGTVVGAAKEAVEQASAPKETWSTIVTNMTEKAAKDAIAAFHEEQQTPTLAQAYISAVSTMALTISGPPATTKRLLQGDAFKGCARVAIPVYAPYHAAHFYSPADIDQILDKDAIRHLQQFRPLSLVHSATTGKCHTATSTLDLIRSALTEILVEPVRWDNLLTEVVSQVTATSSQDCSVSAIGVTTITNSLVSALRNGGQSSVTARDHTTWVAAEHDSRGRTQNDKIAIVGMSGRFPGAANPDALWDLLEKGL…
Alternaria_arborescens_DET2008_GCA_020736785.1	g7457	KS-AT-DH-ER-KR-xCP	MNDFVDPEGTSMPASSPNGLVPIAIVGFGFKFPQDITNAESLWKLLMERRSTMTEIPQNRWNIEGFYKEHGHRPGTVKNRGGHFLADDPARFDAPFFSVQPAEAECMDPQQRLLLETSYHALENAGIPMKAAMGTRTSVHVGCLLQEYSQISQRDSQMPGDYRIVGSSGLAMLANRLSWFYDFSGPSMTVDTACSGGLVAFHLACQELSAGSVDMSLVCGNNLCLLPDSTALLSSLNMMSKDSVCYSFDERASGYARGEGFGVLILKRLDTAIADGDTIRGVVRSTGCGQDGNTPSITSPSQSAQERLIRETYARAGLDLGDTRYFEAHGTGTPVGDPCEAAAISNVFSCRTPEDPIFVGALKSNMGHPEGASGIAGVIKTLLVLEKGIIPPNVYPERI…
Alternaria_arborescens_DET2008_GCA_020736785.1	g11540	KS-AT-DH-MT-ER-KR-xCP	MNKPVAIIGIAFRGPGDARDPEAFYRMLVEGRNARTEIPKDRYNVDAFYHPDAERLGSIQQRHAHFLQQDFKVFDAPFFSITPKEAKAMDPTHRILLEDTYEGFENAGLSLEKVSGTQTSCYIGTFTADFPNLQARDNESPSIYHATGMSASLASNRLSWFYNLRGPSLTVDTACSSSLTAFHLACQSIRTGEAEMSVVGGANLMFGPDMSILLGAAKILSPEGKSKMWDANANGFARGEGFGVTILKSLDAALRDGDNIRAVVLATAANEDGHTPGISLPNSEAQQELIRRAYQMAGVDPAETAYVEAHGTGTQAGDPLEARAILNTVGSVEGRKSDLYVGSVKTNIGHLEGAAGVAGIVKAALTVERGMIPPNLWFEKLNPEIDLPENVKIASKLTP…
Alternaria_arborescens_DET2008_GCA_020736785.1	g2827	KS-AT-DH-MT-ER-KR-xCP	MATDRTTPIAIIGMNMKFPGDAVSAQAFWELLMSARNVSKEIPSDRFNIDAFYHPDPNRLDSLRIRHAHFMEEDPRSFDAPFFNMSYAEASVLDPQQRGLLEGAYRTFENAGIPMETLSRSPTSVYCASFSRDGETITGRDFASQSRYHATANGSSMLSNRVSHFFDLAGPSLTVDTACSSGLYALHLGVQSIIAGESAMSLVCGANTFITPESQALALSNGGFLSIDGKSYSFDEKANGYARGEGFGFVLLKPLEAAIRDKDVIRAVIRATGANQDGRTPSITQPSQQAQLDLLRDTYRVAGLDIADTDYVEAHGTGTPVGDPIEAAAIGEAFRDGRKSDRPLYVGSVKSNIGHLEGASGMAGVIKAVLALEKAVIPPIAMFERTNPAIDTEYLQLAF…
Alternaria_arborescens_DET2008_GCA_020736785.1	g3755	KS-AT-DH-MT-ER-KR-xCP	MEKSPEPIAICGMALRLPGALKTPDQFWTLLTEKRDARARIPIERFDAEAFHSVSGKSGFINSQYGYFLDESAEVGAIDNSLFRMSQQESQSMDPQQKLLLELARECFESAGEVEWRGKDFGTYIGSFGNDWAEVVTKDPLMKSMYKITGHGDFMLANRIAYEYDLKGPSMTVRTGCSASLIGLHEACVAIRNGDCSAALVGGCNLLWSPDTMSDMSEQGVLSLNSSCRTFDADADGYARGEAINLIYIKPLSAAIKDKNPVRAIIRGSATNADGKTAGLSLPSSSSQEEMIRKAYHAAGIPESDINRTAFVECHGTSTPTGDPIEALAVGNVFGNTGVYIGSVKPNVGHSEGASGITSIIKAVLALENRIIPPNIKFKTPNPKIAFVEKDLKVPVDCV…
Alternaria_arborescens_DET2008_GCA_020736785.1	g4048	KS-AT-DH-MT-ER-KR-xCP	MPYQSTNGINGVNGSHDSNGGDNVHGTNGHRSGDVQSTNSDDMSNSIAIVGISCKFAGAAFNLDGLWHTLANGESCWSPIPKSRFDVSNTYHPDPLRTDSLHVKGGFFIEEDLTEFDAPFFNLTAEAAKAMDPQLRLLLEGVYQATEDAGIPTEKLSGSNTSVFSASFGRDYTEMLMKDADALPTSLVTGNGPAMFANRVSHFYNLRGPSVTVDTGCSGGLVALHMGVNSIRNQESDVSIVGASNAILNQDFFIAISNLGLLHEDGKCYSMDHRWGGYGRGEGMAVLVLKKFSAAVNDGDHIHAVIRESAVNQDGRTGTITSPSMDAQRSLIQQCYSRARIDLASTGYVEAHLTGTGGDAIEAEALARTFGKSREACDPVWVGSVKSNIGHTEPVSGLA…
Alternaria_arborescens_DET2008_GCA_020736785.1	g8999	KS-AT-DH-MT-ER-KR-xCP	MEPIAIVGLAFKLPQDIEDEASFWRILEQGQSVMTEWPKSRVDVNAFARSPEATLNTLNSTRGHFLKQNLASFDAPFFSISSKEASAMDPQQRMLLETSYHALENAGIPLSRIAGTETGVFVGTMESDYHRTISKDPDDAPMTTGTGISVSIMANRLSWYFDLKGPSMQLNTACSSSMIAVDLGCQSIRSGQSSTVLVAGSSLMLDPEYSLYLSNMNMLSPDGICHSFDDRANGYSRGEGVIVMILKKLSTAISDGDNIRAIIRGTGSNQDGRTPGITQPSSVSQESLIRHTYRTCNLGFESTRYIEAHGTGTQIGDAMEMRALGAVFRTARSPRAPLFVGSVKTNIGHLEGGSGLAGIAKSILILEKGFIPPNALFERLNTKVNAKRNNIQVPASCIR…
Alternaria_arborescens_DET2008_GCA_020736785.1	g8217	KS-AT-DH-MT-KR-xCP-C-A-xCP-Red	MSNLEPIAIVGSACRFPGDSDTPSKLWQLIKSPRDLLRQVPEERFDAEAFYHPDSKHHGTTNAIKSYFLDEDPALFDNGFFNIPQSEAEAVDPQQRLLMETVYDSLCASGQTIGELRGSSTAVYVGLMCDDWAGILAQDPDVLPQYGATGMARSIMSNRISYFFDWHGPSMTIDTACSSSLVAVHQAIQTLRSGESQVAIAAGANLILTPGMYIAESKLSMLSPSGRSRMWDKDVDGYARGEGIAAVVLKPLSAAIRDNDHIECLIRGTGVNQDGRTNGITMPSATAQAALIQDTYARAGLDVNKPEDRPQFFHAHGTGTAAGDPQEAEAISKAFYSTNDCDETLYVGSIKTVIGHTEGTAGLASLISTSLALQHKVIPPNMHFNTLNPRLKPFYDHLE…
Alternaria_arborescens_DET2008_GCA_020736785.1	g8363	KS-AT-DH-MT-KR-xCP-C-A-xCP-Red	MANEPSKAIAIVGSSCRLPGGVSSPSEFWELLCHPRDLSQEIPGDRFDANAFYNPNPDHHGTSNVKSAYFLQQDPARFDASFFNINPREAEAIDPQQRMLLELVYEAMESAGYPLESLRGTKTGVFAGLMSTDYHDIQARDVMSLSQYHATGTARSILSNRISYFYDFRGPSITIDTACSSSLVAVHLAVQALRNRECNVAVVAGVNLILGPEMFMSTSNLHMLSPDGKCQMWDAKANGYARAEGGGVLVLRTLEDALQNQVPGTIQSIIRETGVNSDGRTPGITMPSSASQVDLMRTTFERAGLDPTNPDEQCQYFEAHGTGTQAGDAAESKAIYTVFCEPSESIQTHHSPHDTNPAVPPILVGSVKPMLGHSEGAAGIVGLLKTSLSLHHAIIPPNP…
Alternaria_arborescens_DET2008_GCA_020736785.1	g8291	KS-AT-DH-xCP-xCP-MT	MRSQSSHFAPSVAFFCPQSKAPTQAYLEQLQRDTWNTLCKGHTDIANLKSGERHVVSLERWITNGIAGPVSSSMSGILALPLLVVIQICQYFQLLELHKLTHEQMLSSLRNGGGVQGYCGGLPTAFAISCAKDEEDVVRLATKALRLAFAVGAFGELGDDESIEGATTIAVRLRASQQGEELVEGIPGCYISAITDPRTISIVGPVIELMKVADRARDQGLLVTDIHIRGKVHNPENAPLVKVLFDICQEHDEMTLPDASQLRVPVRSNLNGKLLDNCSLTYEAINTILVSRCEWYRLLKEVAQDLAGSGTDSHTFALFGIGDPVPLMPFHNARLRVAKVEAHTAIQEARLAEYKYPEDAIAVTGVSCRLPRANDLEELWQLLAAGTSTCEEIRHDRVP…
Alternaria_arborescens_DET2008_GCA_020736785.1	g1053	SAT-KS-AT-PT-xCP	MIRAKVLYFSGEIPQGDPEGDQRDLFRKLHLLSKERSYPILALFLETITRAVKEEQRQLIRTERDLIPAFESILDLTDHVVELRKTSLGGAVERVLVLAFQLGSFIAYHEAHPLEYNFQSSDTFLIARGPGMLSAAAIALCPNVSMVPSIAGDIAKVAFRFGLVVDQVCRSLEISPDEINAAGAWIYCVYGVDPSEAQEAVALFNAEKEYAETSVASVFNDDGKSVSIGGPPSTLKALFTECEFFKRTRNVPMKKVQGMWHTGKVYGMEHVQQVVPHIDEKHRLHLSLFSPVTGEPFKAANANELLEQIMEEMLTQRIRWDRTIQTVTERLKQVSPNSTQLIAIQPSQYVESLLAQWKNDIPTATHTAEDMMSAIMNLPLGSSPAKDAKSSKIAVVGMA…
Alternaria_arborescens_DET2008_GCA_020736785.1	g4586	SAT-KS-AT-PT-xCP-xCP-Te	MNVLIFGDQTADQYPLLRKACTWKNNSTLTTFLDRVSQVVREEVQKLPRTQRDQIPNFLTTWDLIEAYYAKGLKIPQLESCMVTIAQLAHFIGYYAENPSDLQNPANTRVVGLCTGLLAGSVVASARSLSELLPLATEAVRIAFRTGTVVGAAKEAVEQASAPKETWSTIVTNMTEKAAKDAIAAFHEEQQTPALAQAYISAVSTMALTISGPPATTKRLLQGDAFKGCARVAIPVYAPYHAAHFYSPADIDQILDKDAIRHLQQFRPLSLVHSATTGKCHTATSTLDLIRSALTEILVEPVRWDNLLTEVVSQVTATSSQDCSVSAIGVTTITNSLVSALRNGGQSSVTARDHTTWVAAEHDSRGRTQNDKIAIVGMSGRFPGAANPDALWDLLEKGL…
Alternaria_arbusti_BMP_1465_GCA_024043155.1	g1268	KS-AT-DH-ER-KR-xCP	MVINDSGHEDYGLNQRASAVSAAPKPRRYTQEPIAVVGMGCRLPGDSNSPHALWDFLERGGIADNTPPQSRFRLDTHHDGSKKPKTMRSPGGMFLENIDPKKFDAAFFSTGKLDAIAMDPQQRQLLEVVYECLENAGIPLEKLDGEAIGCFVGSYGVDYADMQARDPDDRAPSVTIGVGRAILSNRISHFLNIHGPSMTIDTACSGSLVGVDVACRYLSSGEIDGALVAGANLYFNPEHNMDSGPMKGASSLSGRCHTFDKKADGYIKGEAINCVMLKRLCDAERDGDPIRAIIRGTSTNSDGKTPGIASPSSEAQAKATRAAYANAGISDLSATGYIEMHGTGTQAGDPQEVKGVASVFSSSRPENAPLLMGSIKSNVGHSEPAAGISGLMKAIMSVE…
Alternaria_arbusti_BMP_1465_GCA_024043155.1	g4902	KS-AT-DH-ER-KR-xCP	MNTPADTEQPSMAPSSQPSGAEPIAIVGFGFKFPQDITDAQSLWKLLMERRSTMTEIPKNRWNIDGFYKEHGHRPGTVKNRGGHFLADDPARFDAPFFSIQPAEAECMDPQQRLLLETSYHALENAGIPMQAAIGTRTSVHVGCLLQEYSQISQRDAQMPGDYRIVGSSGLAMLANRLSWFYDFSGPSMTVDTACSGGLVALHLACQELLAGSVDMSLVGGNNLCLLPDSTALLSSLNMMSKDSVCYSFDERASGYARGEGFGVLILKRLDKAIADGDTIRGVIRSTGCGQDGNTPSITSPSQSAQERLIRETYARAGLDLGDTRYFEAHGTGTPVGDPCEAAAINNVFSSRTPEDPIFVGALKGNMGHPEGASGIAGVIKSLLVLEKGIIPPNVYPER…
Alternaria_arbusti_BMP_1465_GCA_024043155.1	g7864	KS-AT-DH-KR-xCP	MNTPDSNQYSSNSSSPAQMHSSITESELGELGELNDVAVIGMACRVAGGNHSPEQLWESILAKRDASSEIPAMRWEPYRRRDVRNIKALGNTTSRGYYLDALEDFDASFFGISPKEAEQMDPQQRISLEVAWEALESAGIDPKKLSGSDTAVFIGVNSDDYGKLLLEDLSNIEPWLGIGTAYCGIPNRISYHLNLMGPSTAVDAACASSLVAIHHGRQAILLGESKMAITGGVNAICGPGLTRVLDKAGAISPDGSCLSFDDNAHGYGRGEGAAIVVLKRFRDAIRDGDNVIAILKGSAVAQDGKTNGIMAPNAKAQELVARQALKQANVNPATVEYVEAHATSTPLGDPTEVSAISAVYGVSRSKPVNVGSVKPNVGHLEAGAGAIGFIKAVLALNKA…
Alternaria_arbusti_BMP_1465_GCA_024043155.1	g10714	KS-AT-DH-MT-ER-KR-xCP	MNKPIAIIGISFRGPGDARDPEAFYRMLVEGRSARTEIPKDRYNVDAFYHPDPERLGSIQQRHAHFLEQDFKVFDAPFFSITPKEAKAMDPTHRILLEATYEGFENAGLTLEQVSGTQTSCYIGTFTADFPNLQARDNEGPSIYHATGMSASLASNRLSWFYNLRGPSLTVDTACSSSLTAFHLACQSIRTGEAEMSVVGGANLMFGPDMSILLGAAKILSPEGKSKMWDADANGFARGEGFGVTILKPLDAAIRDGDNIRAVVLATAANEDGRTPGISLPNSEAQQELIRTAYRQAGVDPAETGYVEAHGTGTQAGDPLEARAILKTIGSVENRTSDLYVGSVKTNIGHLEGAAGVAGIIKAALTVERGMILPNLWFEKLNPDIDLPENVKIASKLTP…
Alternaria_arbusti_BMP_1465_GCA_024043155.1	g1100	KS-AT-DH-MT-ER-KR-xCP	MATIDKTTPIAIIGMNMKFPGDAVSASSFWELIMSARNVSKEIPADRFNIDAFYHPDPNRLDSLRIRHAHFMEEDPRSFDAPFFNMSYAEASVLDPQQRGLLEGAYRTFENAGIPMETLSRSPTSVYCASFSRDGETITGRDFSAQSRYHATANGSSMLSNRISHFFDLAGPSLTVDTACSSGLYALHLGAQSILAGESKMSLVCGANTFITPESQALALSNGGFLSVDGKSYSFDAKANGYARGEGFGFVLLKPLDAALRDGDVVRAVIRATGANQDGRTPSITQPSQQAQLDLLQDTYRVAGLDVADTDYVEAHGTGTPVGDPIEAAAVGQAFRDGRNADRPLYMGSVKANIGHLEGASGMAGVIKAVLALENAMIPPIAMFEKPNPAIDVADLQLA…
Alternaria_arbusti_BMP_1465_GCA_024043155.1	g2719	KS-AT-DH-MT-ER-KR-xCP	MEPIAIVGLSYKLPEGHNEDHSFWDNLQRGRSLSRPWPKSRGNIDAFYNSNVAMDNTVYSTNAHFVKEDPAAFDAAFFSITSKEAASMDPQQRWLLETSYKALENAGIPPETLAGSQTAVFAASMSDDYSRILARDPDEAPTNTATGTSPSILANRLSWYFDFKGPSIQLNTACSTSMIAMDLACHSLRSGQSSMALLAGANVLLSVEISLYLSNMQMLSPDGVSYSFDHRANGYARGEGAVVLVLKRLSDAIRDSDVIRAVVRATGSNQDGRTPGITQPSAESQEQLIRHVYKSCNLGFESTRYVEAHGTGTQLGDATEMKAIGRAFRASRSQKHPLYVGSVKSNIGHLEGCSGLAGILKSIMILEMGVIPPSALFEKISPKINAKIYNVEVPTKCIP…
Alternaria_arbusti_BMP_1465_GCA_024043155.1	g6555	KS-AT-DH-MT-ER-KR-xCP	MAYEDTKPMPIAIVGFGCRFPGDVTNGEKLWQMLVEKKSARTEVPPDRFNVDAFYNPDGDRFGTYNNRGGHYLAEDVSLFDAPFFSISPAEAMAMDPMQRLLLEVTYEALENSGTPLARVSGSQTSCYVGCFTKDYEEMQRRDMELAPKYQSTGASQTMLSNRLSYFFNLKGPSVSIDTACSSGLVAVHLACQSLRTGESSMAIAGGSNLILSPDIQIEMSDMHFLSPDSISHAFDDRANGYARGEGVGAIILKPLDLAIRDNDPIRAIIRGTAASSDGRTPGITMPSKDAQVDLIRSAYRAAGIDVSETGYFEAHGTGTAAGDPIESGAIGEVFATSRPHRISATTEEVVPLSIGSVKTNMGHLEGASGIAGLIKAVLSVEKGMIAPNLWFERGNPAI…
Alternaria_arbusti_BMP_1465_GCA_024043155.1	g8805	KS-AT-DH-MT-ER-KR-xCP	MPLYYTDTTPTNGIPDMNGVPSDAPPQPKSDDLSNAIAIVGISCKFGGSASNLNGLWHTLSSGESCWSPVPKSRFDISKTSHPDSQRTDSLHVKGGFFIEDDLTEFDAPFFNLTAEVAKSMDPQLRIMLEGVYNATESAGIPIEKLSGSNTSVYSATFGRDYAEMLMKDADSMPTSLVTGNGPAMFANRVSHFYNLMGPSVTVDTGCSGGLVALHMGVNSIRNQESEVSIIGASNAILNQDFYIAISNLGLLHEDGKCYSMDHRFGGYGRGEGMAVLVLKKYSAAVRDGDHIHALIRESAVNQDGRTGTITSPSMDAQQQLINQCYSRAGIDLSSTGYVEAHGTGTGGDAIEAEALALTFGNSREKFDPIWVGSVKSNIGHTEPVSGLAAVIKAALILR…
Alternaria_arbusti_BMP_1465_GCA_024043155.1	g171	KS-AT-DH-MT-KR-xCP-C-A-xCP-Red	MTAHRETSHGNGEPIAVVGSGMRFPGSSNNSSKLWELLLNPRDLLKRIPEDRFNIDNFYHPDPNHHATTDVRESYFLEEDHRHFDAGFFNIKPVEVAAIDPQQRLLMEVVYESLEAAGIPLESLIGSRTGVYVGLMCADYHDHLHKDVDTLPTYAPTGTARSIMSNRISYFFDWHGPCMTIDTACSSSLVAVHQAVQLLRSGDSDVAVAAGVNMILGSGQYIAESSLHMLSADSRSRMWDADASGYARGEGVASVILKRLSTALADGDKIECIIRESGVNQDGRTKGITMPSASAQMDLIEQTYKKAGLDPKDPNQRCQYFEAHGTGTAAGDPKEAEAISKAFFHPGDSTSHKGDPLYVGSIKTVIGHTEGTAGLAGLLKASLAVQHGVIPPNLLFNKL…
Alternaria_arbusti_BMP_1465_GCA_024043155.1	g3116	SAT-KS-AT-DH-xCP-xCP-MT	MRSQSDHFAPSVAFFCPQSKAPTEAYLEQLQKYIVETPLLLPFAEAITSLTDTWTILCDGHPDIAKLKSGKRHVVSLKRWITDGISGPVSSSMSGILALPLLVVIQICQYFQLLELHGLTHERMLASLKKGGGAQGYCGGLPTAFAVSCAKDEEEVVHLATKALRLAFAVGAFGELGDDELVEGATTIAVRLRTPPQGDELVAGIPRCYISAITDPKTISIVGPVLELEKVAERARNRGLLVTDIHIRGKVHNPENAPLVKVLFDICREHDDMMLPDASQLRVPVRSNLDGSLLHDCSLTHEAINTILASRCEWYRLLKDVAQDLAGSGTDAHTFALFGIGDPVPLMPFHNARLRISKMEVHTTVQGARLAEYKYPEDAVAITGVSCRLPRAADLEELW…
Alternaria_arbusti_BMP_1465_GCA_024043155.1	g7332	SAT-KS-AT-PT-xCP-xCP-Te	MNVLIFGDQTADQYPLLRKACTWKNNSTLTSFLDRVSQVVREEVQKLPRTQRDQIPNFLTTWDLIEAYYAKGLKVPQLESCMVTIAQLSHYIGYYAENPSDLKNPANTRVVGLCTGLLAGSVVASARSLSELLPLAIEAVRIAFRTGTVVGAAKEALEQTPVPKETWSTIVTSISEKAAKDAITAFHQEQRIPTLAQAYISAVSTMALTISGPPSTTKRLLQSDAFKGCTRVSIPVYAPYHAAHLYTEADIDQILDKDATRHLQQFRPLSLVHSASTGECHTATSTLDLIRTALTEILVESVRWDNLLSEVVSQVTATSSQDCSVSAIGVTSITNSLVSALKSGGQSSVTARDHTSWVAAEHDSRGRTQNDKIAIVGMSGRFPSAANPDALWDLLEKGL…
Alternaria_arbusti_DAOMC238834_GCA_040583865.1	g1268	KS-AT-DH-ER-KR-xCP	MVINDSGHEDYGLNQRASAVSAAPKPRRYTQEPIAVVGMGCRLPGDSNSPHALWDFLERGGIADNTPPQSRFRLDTHHDGSKKPKTMRSPGGMFLENIDPKKFDAAFFSTGKLDAIAMDPQQRQLLEVVYECLENAGIPLEKLDGEAIGCFVGSYGVDYADMQARDPDDRAPSVTIGVGRAILSNRISHFLNIHGPSMTIDTACSGSLVGVDVACRYLSSGEIDGALVAGANLYFNPEHNMDSGPMKGASSLSGRCHTFDKKADGYIKGEAINCVMLKRLCDAERDGDPIRAIIRGTSTNSDGKTPGIASPSSEAQAKATRAAYANAGISDLSATGYIEMHGTGTQAGDPQEVKGVASVFSSSRPENAPLLMGSIKSNVGHSEPAAGISGLMKAIMSVE…
Alternaria_arbusti_DAOMC238834_GCA_040583865.1	g3005	KS-AT-DH-ER-KR-xCP	MNTPADTEQPSMAPSSQPSGAEPIAIVGFGFKFPQDITDAQSLWKLLMERRSTMTEIPKNRWNIDGFYKEHGHRPGTVKNRGGHFLADDPARFDAPFFSIQPAEAECMDPQQRLLLETSYHALENAGIPMQAAIGTRTSVHVGCLLQEYSQISQRDAQMPGDYRIVGSSGLAMLANRLSWFYDFSGPSMTVDTACSGGLVALHLACQELLAGSVDMSLVGGNNLCLLPDSTALLSSLNMMSKDSVCYSFDERASGYARGEGFGVLILKRLDKAIADGDTIRGVIRSTGCGQDGNTPSITSPSQSAQERLIRETYARAGLDLGDTRYFEAHGTGTPVGDPCEAAAINNVFSSRTPEDPIFVGALKGNMGHPEGASGIAGVIKSLLVLEKGIIPPNVYPER…
Alternaria_arbusti_DAOMC238834_GCA_040583865.1	g11464	KS-AT-DH-KR-xCP	MNTPDSNQYSSNSSSPAQMHSSITESELGELGELNDVAVIGMACRVAGGNHSPEQLWESILAKRDASSEIPAMRWEPYRRRDVRNIKALGNTTSRGYYLDALEDFDASFFGISPKEAEQMDPQQRISLEVAWEALESAGIDPKKLSGSDTAVFIGVNSDDYGKLLLEDLSNIEPWLGIGTAYCGIPNRISYHLNLMGPSTAVDAACASSLVAIHHGRQAILLGESKMAITGGVNAICGPGLTRVLDKAGAISPDGSCLSFDDNAHGYGRGEGAAIVVLKRFRDAIRDGDNVIAILKGSAVAQDGKTNGIMAPNAKAQELVARQALKQANVNPATVEYVEAHATSTPLGDPTEVSAISAVYGVSRSKPVNVGSVKPNVGHLEAGAGAIGFIKAVLALNKA…
Alternaria_arbusti_DAOMC238834_GCA_040583865.1	g10227	KS-AT-DH-MT-ER-KR-xCP	MEPIAIVGLSYKLPEGHNEDHSFWDNLQRGRSLSRPWPKSRGNIDAFYNSNVAMDNTVYSTNAHFVKEDPAAFDAAFFSITSKEAASMDPQQRWLLETSYKALENAGIPPETLAGSQTAVFAASMSDDYSRILARDPDEAPTNTATGTSPSILANRLSWYFDFKGPSIQLNTACSTSMIAMDLACHSLRSGQSSMALLAGANVLLSVEISLYLSNMQMLSPDGVSYSFDHRANGYARGEGAVVLVLKRLSDAIRDSDVIRAVVRATGSNQDGRTPGITQPSAESQEQLIRHVYKSCNLGFESTRYVEAHGTGTQLGDATEMKAIGRAFRASRSQKHPLYVGSVKSNIGHLEGCSGLAGILKSIMILEMGVIPPSALFEKISPKINAKIYNVEVPTKCIP…
Alternaria_arbusti_DAOMC238834_GCA_040583865.1	g1100	KS-AT-DH-MT-ER-KR-xCP	MATIDKTTPIAIIGMNMKFPGDAVSASSFWELIMSARNVSKEIPADRFNIDAFYHPDPNRLDSLRIRHAHFMEEDPRSFDAPFFNMSYAEASVLDPQQRGLLEGAYRTFENAGIPMETLSRSPTSVYCASFSRDGETITGRDFSAQSRYHATANGSSMLSNRISHFFDLAGPSLTVDTACSSGLYALHLGAQSILAGESKMSLVCGANTFITPESQALALSNGGFLSVDGKSYSFDAKANGYARGEGFGFVLLKPLDAALRDGDVVRAVIRATGANQDGRTPSITQPSQQAQLDLLQDTYRVAGLDVADTDYVEAHGTGTPVGDPIEAAAVGQAFRDGRNADRPLYMGSVKANIGHLEGASGMAGVIKAVLALENAMIPPIAMFEKPNPAIDVADLQLA…
Alternaria_arbusti_DAOMC238834_GCA_040583865.1	g11193	KS-AT-DH-MT-ER-KR-xCP	MAYEDTKPMPIAIVGFGCRFPGDVTNGEKLWQMLVEKKSARTEVPPDRFNVDAFYNPDGDRFGTYNNRGGHYLAEDVSLFDAPFFSISPAEAMAMDPMQRLLLEVTYEALENSGTPLARVSGSQTSCYVGCFTKDYEEMQRRDMELAPKYQSTGASQTMLSNRLSYFFNLKGPSVSIDTACSSGLVAVHLACQSLRTGESSMAIAGGSNLILSPDIQIEMSDMHFLSPDSISHAFDDRANGYARGEGVGAIILKPLDLAIRDNDPIRAIIRGTAASSDGRTPGITMPSKDAQVDLIRSAYRAAGIDVSETGYFEAHGTGTAAGDPIESGAIGEVFATSRPHRISATTEEVVPLSIGSVKTNMGHLEGASGIAGLIKAVLSVEKGMIAPNLWFERGNPAI…
Alternaria_arbusti_DAOMC238834_GCA_040583865.1	g5809	KS-AT-DH-MT-ER-KR-xCP	MNKPIAIIGISFRGPGDARDPEAFYRMLVEGRSARTEIPKDRYNVDAFYHPDPERLGSIQQRHAHFLEQDFKVFDAPFFSITPKEAKAMDPTHRILLEATYEGFENAGLTLEQVSGTQTSCYIGTFTADFPNLQARDNEGPSIYHATGMSASLASNRLSWFYNLRGPSLTVDTACSSSLTAFHLACQSIRTGEAEMSVVGGANLMFGPDMSILLGAAKILSPEGKSKMWDADANGFARGEGFGVTILKPLDAAIRDGDNIRAVVLATAANEDGRTPGISLPNSEAQQELIRTAYRQAGVDPAETGYVEAHGTGTQAGDPLEARAILKTIGSVENRTSDLYVGSVKTNIGHLEGAAGVAGIIKAALTVERGMILPNLWFEKLNPDIDLPENVKIASKLTP…
Alternaria_arbusti_DAOMC238834_GCA_040583865.1	g9600	KS-AT-DH-MT-ER-KR-xCP	MPLYYTDTTPTNGIPDMNGVPSDAPPQPKSDDLSNAIAIVGISCKFGGSASNLNGLWHTLSSGESCWSPVPKSRFDISKTSHPDSQRTDSLHVKGGFFIEDDLTEFDAPFFNLTAEVAKSMDPQLRIMLEGVYNATESAGIPIEKLSGSNTSVYSATFGRDYAEMLMKDADSMPTSLVTGNGPAMFANRVSHFYNLMGPSVTVDTGCSGGLVALHMGVNSIRNQESEVSIIGASNAILNQDFYIAISNLGLLHEDGKCYSMDHRFGGYGRGEGMAVLVLKKYSAAVRDGDHIHALIRESAVNQDGRTGTITSPSMDAQQQLINQCYSRAGIDLSSTGYVEAHGTGTGGDAIEAEALALTFGNSREKFDPIWVGSVKSNIGHTEPVSGLAAVIKAALILR…
Alternaria_arbusti_DAOMC238834_GCA_040583865.1	g171	KS-AT-DH-MT-KR-xCP-C-A-xCP-Red	MTAHRETSHGNGEPIAVVGSGMRFPGSSNNSSKLWELLLNPRDLLKRIPEDRFNIDNFYHPDPNHHATTDVRESYFLEEDHRHFDAGFFNIKPVEVAAIDPQQRLLMEVVYESLEAAGIPLESLIGSRTGVYVGLMCADYHDHLHKDVDTLPTYAPTGTARSIMSNRISYFFDWHGPCMTIDTACSSSLVAVHQAVQLLRSGDSDVAVAAGVNMILGSGQYIAESSLHMLSADSRSRMWDADASGYARGEGVASVILKRLSTALADGDKIECIIRESGVNQDGRTKGITMPSASAQMDLIEQTYKKAGLDPKDPNQRCQYFEAHGTGTAAGDPKEAEAISKAFFHPGDSTSHKGDPLYVGSIKTVIGHTEGTAGLAGLLKASLAVQHGVIPPNLLFNKL…
Alternaria_arbusti_DAOMC238834_GCA_040583865.1	g7648	SAT-KS-AT-DH-xCP-xCP-MT	MRSQSDHFAPSVAFFCPQSKAPTEAYLEQLQKYIVETPLLLPFAEAITSLTDTWTILCDGHPDIAKLKSGKRHVVSLKRWITDGISGPVSSSMSGILALPLLVVIQICQYFQLLELHGLTHERMLASLKKGGGAQGYCGGLPTAFAVSCAKDEEEVVHLATKALRLAFAVGAFGELGDDELVEGATTIAVRLRTPPQGDELVAGIPRCYISAITDPKTISIVGPVLELEKVAERARNRGLLVTDIHIRGKVHNPENAPLVKVLFDICREHDDMMLPDASQLRVPVRSNLDGSLLHDCSLTHEAINTILASRCEWYRLLKDVAQDLAGSGTDAHTFALFGIGDPVPLMPFHNARLRISKMEVHTTVQGARLAEYKYPEDAVAITGVSCRLPRAADLEELW…
Alternaria_arbusti_DAOMC238834_GCA_040583865.1	g2052	SAT-KS-AT-PT-xCP-xCP-Te	MNVLIFGDQTADQYPLLRKACTWKNNSTLTSFLDRVSQVVREEVQKLPRTQRDQIPNFLTTWDLIEAYYAKGLKVPQLESCMVTIAQLSHYIGYYAENPSDLKNPANTRVVGLCTGLLAGSVVASARSLSELLPLAIEAVRIAFRTGTVVGAAKEALEQTPVPKETWSTIVTSISEKAAKDAITAFHQEQRIPTLAQAYISAVSTMALTISGPPSTTKRLLQSDAFKGCTRVSIPVYAPYHAAHLYTEADIDQILDKDATRHLQQFRPLSLVHSASTGECHTATSTLDLIRTALTEILVESVRWDNLLSEVVSQVTATSSQDCSVSAIGVTSITNSLVSALKSGGQSSVTARDHTSWVAAEHDSRGRTQNDKIAIVGMSGRFPSAANPDALWDLLEKGL…
Alternaria_atra_na_GCA_907166805.1	g2445	KS-AT-DH-DH-MT-ER-KR-xCP	MAFSEVGQDSESPRINGGVNGIVNGSVNGSANGNVNGGPNGSLHCNGTNGHSNGVSSSSDPIAASPLAASQTHDNLTPIAICGMALRLPGGLESPQDLWEFLLAKGDARSRVPESRYNISAYHSDSGKPGTIATQYGYFLDDSVKLGSLDASRFSLSRAELEFSDPQQRRMLEVVREAFDDAGENNFKGRSIGCYMGSYGEDWLEMQNRDHQQSGVNRVDGYSDFMLSSRISYEMDLKGPCMTVRTACSAALIGLNEACQAIRTGLCEAAVIGGANLIMAPGMTAFMTEKGVLSPDGHCKTFSADANGYARGESITAILIKPLKAAIRDGNPVRAILRSVVSNSDGRTQGIAQPSTESQEALMRKAYRDVGISDFSKTAFVECHGTGTPVGDPIETNAV…
Alternaria_atra_na_GCA_907166805.1	g10639	KS-AT-DH-ER-KR-xCP	MDDSVDSREPSMAPSNRPNSVEPIAIVGFGFKFPQDITSAESLWKLLIERRSTMTEIPKNRWNIDGFYKEHGHRPGTVKNRGGHFLADDPARFDAPFFSIQPAEAECMDPQQRLLLETSYHALENAGIPMQAAMGTRTSVHVGCLLQEYSQISQRDAQMPGDYRIVGSSGLAMLANRLSWFYDFSGPSMTVDTACSGGLVAFHLACQELLAGSVDMSLVCGNNLCLLPDSTALLSSLNMMSKDSVCYSFDERASGYARGEGFGVLILKRLDKAIADGDTIRGVVRSTGCGQDGNTASITAPSQSAQERLIRETYARAGLDLDNTRYFEAHGTGTPVGDPCEAAAINNVFSSRTPEDPIFVGALKSNMGHPEGASGIAGVIKTLLVLEKGIIPPNVYPER…
Alternaria_atra_na_GCA_907166805.1	g5216	KS-AT-DH-ER-KR-xCP	MAIVGFACRLPGGNNSPQKLWEFLESGGVAPNKVPKSRFNIDGHYDGSHKPGTMRPPGGMFLSDDIDLAHFDASFFETSGSDAIGIDPNQRQLLEVVYEGLESAGLTLEKLDGAPVACFVGSYSSDYHAMLNRDGEDAPPNFVAGTARAMLANRVSYFLNIKGPSVTVDTACSGSLVGLDLACRSLQMGEANLAIVAASNLFLNPEHVMDTGGMGQAHSPTALCHTFDADADGYVKAEAVNCLIIKRLADAIRGRDPIRAVVRGTASNSNGRTVGGIVSPNSVAQATAIRTAYARAGISDFNETAYLECHGTGTPAGDAAEVNGAGSVFGRTRDTARPLLIGSIKSNLGHAEPAAGISGVIKVILSMEKNQIPGTPTFIKPSPKIDFSGNRVKASRRVV…
Alternaria_atra_na_GCA_907166805.1	g682	KS-AT-DH-ER-KR-xCP	MAPHQTIPDIEGASDGNRYSNGHHHTNGSSKTESIADAVTNGADASTAYVQDPVAVVSMACRLPDECSNLRQFWNFLSEGKIAVNTPPGTRFDINTHYDGSLKPQTMASPGGMFLQNVDPRDIDAQFFKLSGIEATSMDPQQRQLLEVVYEGLENAGVTLEQMSGAPVGCFVSSFASDYGDMQARDPENRASATAVGVGRAMLSNRISHFLNTKGPSMTIDTACSGALIGLDLAMRYLQTREVTSAIVAGANLYCSPEHVMDHYMGANGAASLSGKCHTFDSKADGYIKAEAVSMVYLKRLEDAIRDKDPIRAIIRGTATNSDGWTAGIASPNHEAQSAAIRQAYKNAGIRDLNVTSYVEFHGTGTRVGDSLEATGVANVFAPSRDPAKPLRIGSVKSN…
Alternaria_atra_na_GCA_907166805.1	g1262	KS-AT-DH-MT-ER-KR-xCP	MACEDTKPMPVAIVGFGCRFPGDVTNGEKLWEMLVEKRSARTEVPLDRFNINAFHNPDGDRFGTCNNRGGHYLTEDVSLFDAPFFSISPAEAMAMDPMQRLLLEVTYEALENSGTPLARVSGSKTSCYVGCFTKDYEEMQRRDMELAPKYQSTGASQTMLSNRLSYFFNLKGPSVSVDTACSSGLVAVHLACQSLRMGESSMAIAGGSNLILSPDIQIEMSDMHFLSPDSISHAFDDRANGYARGEGVGAIILKPLDLALRDNDPVRAIIRGTAASSDGRTPGITMPSKDAQVDLIRSAYRAAGIDVSETGYFEAHGTGTAAGDPIESGAIGEVFAANRPRRIMETTEEVVPLSIGSVKTNMGHLEGASGIAGIIKAMLSVEKGTIAPNLWFERGNPAI…
Alternaria_atra_na_GCA_907166805.1	g6662	KS-AT-DH-MT-ER-KR-xCP	MASNMTSEPIAIIGMSCRFPGGASEPARLWDVLSSGKSAWSEVPKDRFNMKAFYLKGDPHPSTTNTPGGHFLDSDVATFDCSFFEIKPTEARAMDPQQRLTLELAYEAFENAGLTISQLWGSSTGVYVGQWSSDYSEIMARDPEHQELYHTLGTGAAITSNRVSFFFNLRGPSFTVDTGCSASLVALHNAVQSLRSGESTMSLVGGVNILLDPQRFTYQSKLKMFSPDGRSFSFDERANGYGRGEGCGCVVLKPLSLAIKDGDEIRAVIRNSALNQDGRTPQGISVPSGEAQEELIRRAYAEAGLVPAETDYVEAHGTGTAVGDPIEAQAIANVLACPRDSTQGPLIMGSVKGNIGHTESAAGIAGLIKSVLMLENQALPPQVNYEKPNPKIPLDIWNL…
Alternaria_atra_na_GCA_907166805.1	g11442	KS-AT-DH-MT-KR-xCP-C-A-xCP-Red	MHSPNRTEQREEPIAIIGIACRFPGGANTPSKLRDLIHSPHDLSRTVPTTRFDTKSFFHSESSHHGTTNADKAYFLDDDVSHFDAPFFNVQATEADAIDPQQRLLMEVVYESLCNAGQRVEDMKGSNTAVYVGLMCDDWAQITGRDWDMIPTYQATGTSRAILSNRVSYFFDWHGPSMTIDTACSSSLVAVHQAVAALRSGESPMAVVAGTNLILSPGMWIAESNLRMLSPTGTSKMWDAAADGYARGEGVAAVIMKPLTAAIRDGDNIDCIIRATGINQDGRTSGITVPSNLAQTQLIIDTYARAGMDINDTKDRPQFFHAHGTGTRAGDPQEAEAISRAFFQGECTAKAPLYVGSIKTVIGHTEGTAGLASLVSTALAMKSGFIPPNLHYNTLSPSV…
Alternaria_atra_na_GCA_907166805.1	g10354	KS-AT-MT-MT-KR-xCP	MAPENQTANAEAPARYEPVAIIGLSCRLPGDARNAEQFWELLESARGAWSEIPKSRFNLDAFYHPDHTHHGTTHVKGGHFLSQDILDFDNSFFRLNAEVAAATDPQLRLQLETTYEAFEDAGLCMEDLAGSRTSVFAGAFHRDHHDSMMKDPDNLPRNTMLGAGTAMLANRISHYFDLRGPSLVADTGCSTSHVILHMACRSLQTGDSTISVVTAGNVMLGPEPFISMSGLGLLSKDGRCYAFDSRASGYGRGEGAVSLVLKLESQAIADGDNIHAVIRSTALNQDGRTPTITSPSQEAQEELIRECYQKAGLDPAETDYFECHGTGTQVGDLTEATAVRNVFRANESSSLGDHPLYVGSVKSNIGHLEAAAGLAGIVKVVQAMRHGKIPPNHDFQRPN…
Alternaria_atra_na_GCA_907166805.1	g8714	SAT-KS-AT-DH-xCP-MT	MNHFAPSVAFFCPQSKAPTEAYLEQLQKYIVGTPLLQPFAQAITSLRYTWSTLCEGHADIAKLKSGERHVASLERWITDGIAGPVSSSMSGILALPLLVVIQICQYFQLLELHDLTHEQMLSSLRNGGGAQGYCGGLPTAFAISCAKDEEDLVRLATKALRLAFAVGAFGELSDDESIEGATTIAVRLRASQQGGELVDDNPGCYISAITDPRTISIVGPVLELKKVAERARNQGLLVTDIHIRGKVHNPENAPLVKVLFDICNEHDEMALPDASQLRVPVRSNLNGKLLDNCSLTHEAINTILASRCEWYRLLKEVAQDLTGSGTDAHTFALFGIGDPVPLMPFHNARLRVSKIEAHTAIQEARLAEYKYPEDAIAITGVSCRLPQANDLEELWQLLA…
Alternaria_atra_na_GCA_907166805.1	g9637	SAT-KS-AT-PT-xCP-Te	MAETMQVLVFGDVTADYDAGLRILVSKTDNPLLTAFFDQVAFSLRAEIGQLSRSQRNLPGLVRFTTIIDLLARLRASDIRHHALEKALTCVHHFASFISHYGQAETPYPDPATTRLVGLCTGSLTAAAVSCTRSLNELIPLAVQVVLVALRVGFAVTDVRDRISPAQSDQSWSVMIPGLTGNAAVPYLDKFIEETCLTNVWKPYVSAYAGTGVTISGPPSTIDRLLRSKILPKPSAIKFRVHGPYHASHLFSANLLDDIIEASHKSSLLDRNAFIPVCSSTGTGICTGTSLVDLLRNAVSEILISPLRLDDVCKSLSNDLSQCGLDDCVVLPVATLAAQAISNQLKTTITNVSINKGMMSNASTPGAASGNLAQDKLAIIGYSGRYPGAKDNEAFWQLL…
Alternaria_atra_na_GCA_907166805.1	g97	SAT-KS-AT-PT-xCP-Te	MKTSHRTVLLFGDVTDPWVEGIDHVYVQAAKKPWIRSFLEDLFSAIKTETKAMDRVLQEGFKDSSSFQELAERYRHAGDDFGMAHAMMIYAIRAVVLLETLSREPHILDESRPRPEVIGISGGLFSAAVMSISINFETLYAACIEAGRVWSRLCNLTLVRSRAMEESPGTWGWAILGIPAADLGKTLDQFQSSMGIHSSKRAKIGVIGDRWSTIIGPPSVLELTLSECPNLKNLPKNELNIHALQHTLSVSDSDIDYIVGNSPLLETPLPSGYRIHGLDDDFPEASYAEWRHLLRASAYQTLSRPLDIVQAVSNLNAALGASKDIEAKIIGPSSHTTYLVKCLQTAGKEVFVQNGFLASPQTSGTNDGIAIVGMAGKGPGSDDLEEFWNVILKGLDLHE…
Alternaria_atra_na_GCA_907166805.1	g2393	SAT-KS-AT-PT-xCP-xCP-Te	MNVLIFGDQTADQYPLLRKACTWKNNSTLTTFLDRVSQVVREEVQKLPRTQRDQIPNFLTTWDLIEAYYAKGLKVTQLESCMVTIAQLAHYIGYYAENPSDLQNAANTRVVGLCTGLLAGSVVASARSLSELLPLATEAVRIAFRTGTVVSAAKEALEQASATKEAWSTIVTNMTEKAAKDAIAAFHEEQRTPVLAQAYISAVSTMALTISGPPATTKRLLQGDAFKGCARVAIPVYAPYHAAHLYAEADIDQILDKDAIRHLQQFRPLSLVHSASTGKCHTATSTLDLIRTALTEILVEPVRWDNLLTEVVSQVTATSSQDCSVSAIGVTTITNSLVSALRNGGQSSITARDHTTWVAAEHDSRGRTQNDKIAIVGMSGRFPGAANPDALWDLLEKGL…
Alternaria_atra_na_GCA_907166805.1	g11418	Te-KS-AT-DH-MT-KR-xCP-C-A-xCP	MDQNPEVIQAHAGDHYTTPVFLIHDGGGTTFAYHCLDPLDRPVYGISNPYFHTGEGFEGGICGMARLYAGIIRLAAANPDFPAERDSGGRANILIGGWSLGGLLALEVAKILTGDRGVRIIGALMMDSIYPVNPPSMVRLGALDDMAAGEKSKNELLTLQAMKEALRVIQKWTPPVWAGTEVRPRFSLLRALDAMPATGIDGVHPADIHRSDPTLGWDAYDTSLFTDVEGVPGTHFEMFSFQHVEGLSKAVKRLPVLYNMYEPVAIVGTACRFPGAASSTSKLWDLLKAPRDVLKEFPPERLNTANFYNENGDMHGRMNVEHKSYLLEEDVRHFDAAFFRINPKEAADMDPQQRLLLETVYEAFESAGWSLDDVSGSDTSVHVGTMTDDYIIIQGRDPD…
Alternaria_brassicae_BTP_GCA_036768455.1	g6951	KS-AT-DH-ER-KR-xCP	MNDFVDPEGTFMPASSPNGLVPIAIVGFGFKFPQDITNAESLWKLLMERRSTMTEIPQNRWNIEGFYKEHGHRPGTVKNRGGHFLADDPARFDAPFFSVQPAEAECMDPQQRLLLETSYHALENAGIPMKAAMGTRTSVHVGCLLQEYSQISQRDSQMPGDYRIVGSSGLAMLANRLSWFYDFSGPSMTVDTACSGGLVAFHLACQELSAGSVDMSLVCGNNLCLLPDSTALLSSLNMMSKDSVCYSFDERASGYARGEGFGVLILKRLDTAIADGDTIRGVVRSTGCGQDGNTPSITSPSQSAQERLIRETYARAGLDLGDTRYFEAHGTGTPVGDPCEAAAISNVFSCRTPEDPIFVGALKSNMGHPEGASGIAGVIKTLLVLEKGIIPPNVYPERI…
Alternaria_brassicae_BTP_GCA_036768455.1	g2546	KS-AT-DH-MT-ER-KR-xCP	MEPIAIVGLAYKLPQDIEDEASFWRILEQGQSVMTEWPKSRVDANAFARSPEAALNTLTSTRGHFLEQNLASFDAPFFSISSKEASAMDPQQRMLLETSYHALENAGIPLSRIAGTETGVFVGTMESDYHRMISKDPDDAPMTTATGISVSIMANRLSWYFDLKGPSMQLNTACSSSMIAVDLGCQSIRSGQTSTVLVAGSSLMLDPEYSLYLSNMNMLSPDGICHSFDDRANGYSRGEGVIVMILKKLSTAISDGDNIRAVIRGTGSNQDGRTPGITQPSSVSQENLIRHTYRTCNLGFESTRYIEAHGTGTQIGDAMEMRALGAVFRTARSPKAPLFVGSVKANIGHLEGGSGLAGIAKSILILEKGFIPPNALFERLNTKVNAKRHNIQVPGSCIR…
Alternaria_brassicae_BTP_GCA_036768455.1	g558	KS-AT-DH-MT-ER-KR-xCP	MNKPVAIIGIAFRGPGDARDPEAFYRMLVEGRNARTEIPKDRYNVDAFYHPDAERLGSIQQRHAHFLQQDFKVFDAPFFSITPKEAKAMDPTHRILLEATYEGFENAGLSLEKVSGTQTSCYIGTFTADFPNLQARDNEGPSIYHATGMSASLASNRLSWFYNLRGPSLTVDTACSSSLTAFHLACQSIRTGEAEMSVVGGANLMFGPDMSILLGAAKILSPEGKSKMWDANANGFARGEGFGVTILKPLDAALRDGDNIRAVVLATAANEDGHTPGISLPNSEAQQELIRRAYQMAGVDPAETGYVEAHGTGTQAGDPLEARAILNTVGSVEGRRSDLYVGSVKTNIGHLEGAAGVAGIIKAALIVERGMIPPNLWFEKLNPEIDLPENVKIASKLTP…
Alternaria_brassicae_BTP_GCA_036768455.1	g7329	KS-AT-DH-MT-ER-KR-xCP	MLYQSTNGTNGINGFHDRNGDNNVHGTNGHRSGDVQSTNSDDMSNSIAIVGISCKFGGAASNLDGLWHTLANGESCWSPIPKSRFDVSNTYHPDPLRTDSLHVKGGFFIDEDLTKFDAPFFNLTADAAKAMDPQLRLLLEGVYQATEDAGIPTEKLSGSNTSVFSASFGRDYTEMLMKDAEALPTSLVTGNGPAMFANRVSHFYNLRGPSVTVDTGCSGGLVALHMGVNSIRNQESDVSIVGASNAILNQDFFIAISNLGLLHEDGKCYSMDHRWGGYGRGEGMAVLVLKKFSAAVKDGDHIHAVIRESAVNQDGRTGTITSPSMDAQRSLIQQCYIRAGIDLASTGYVEAHLTGTGGDAIEAEALARTFGKSREACDPVWVGSVKSNIGHTEPVSGLA…
Alternaria_brassicae_BTP_GCA_036768455.1	g9408	KS-AT-DH-MT-ER-KR-xCP	MATDRTTPIAIIGMNMKFPGDAVSAQAFWELLMSARNVSKEIPSDRFNIDAFYHPDPNRLDSLRIRHAHFMEEDPRSFDAPFFNMSYAEASVLDPQQRGLLEGAYRTFENAGIPMETLSRSPTSVYCASFSRDGETITGRDFAAQSRYHATANGSSMLSNRVSHFFDLAGPSLTVDTACSSGLYALHLGVQSILAGESAMSLVCGANTFITPESQALALSNGGFLSVDGKSYSFDEKANGYARGEGFGFVLLKPLEAAIRDKDVIRAVIRATGANQDGRTPSITQPSQQAQLDLLRDTYRVAGLDVADTDYVEAHGTGTPVGDPIEAAAIGEAFRDGRKPDRPLYVGSVKSNIGHLEGASGMAGVIKAVLALEKAVIPPIAMFEKTNPAVDTEYLQLAF…
Alternaria_brassicae_BTP_GCA_036768455.1	g2584	KS-AT-DH-MT-KR-xCP-C-A-xCP-Red	MSNLEPIAIVGSACRFPGDSDTPSKLWQLIKSPRDLLRQVPEERFDAEAFYHPDSKHHGTTNAIKSYFLDEDPALFDNGFFNIPQGEAEAVDPQQRLLMETVYDSLCAAGQTIEELRGSSTAVYVGLMCDDWAGILAQDPDVLPQYGATGMARSIMSNRISYFFDWHGPSMTIDTACSSSLVAVHQAIQTLRSGESQVAIAAGANLILTPGMYIAESKLSMLSPSGRSRMWDKDVDGYARGEGIAAVVLKPLSAAIRDNDHIECLIRGTGVNQDGRTNGITMPSATAQAALIRDTYARAGLDVNKPEDRPQFFHAHGTGTAAGDPQEAEAISKAFYSTNDCDETLYVGSIKTVIGHTEGTAGLASLISTSLALQHKVIPPNMHFNTLNPRLKPFYDHLE…
Alternaria_brassicae_BTP_GCA_036768455.1	g11156	KS-AT-DH-MT-KR-xCP-Red	MSPNAPINEPIAIIGSGCRFAGGASSPSKLWDLLRDPKDIRSNITDKRFNAEGFYHPDGTHHGHMNVMQSYLLDEDTRVFDAEFFGINPVEAKAMDPQQRLLLEVVYESIESAGLSLDRMRGSDTAVFAGLMCGDYEAMMLRDLDQAPTHFATGTSRAVMSNRVSYFFDWHGPSVTIDTACSSSLVAVHQAIQTLRSGDSHTAVACGSNLIFGPEMYVIESKLKMLSPDSLSRMWDKDANGYARGEGVTAVVLKTLSQALADNDRIEAVVRETGVNSDGATPGITMPSASAQRDLIHSVYKKAGLDPQCAEDRPQFIEAHGTGTPAGDPIEAEALSTAFFSNKEKSSTPINTGSIKTVLGHTEGSAGIAALLKVTQAMQNSTIPPNLWFQQLNPKLEPF…
Alternaria_brassicae_BTP_GCA_036768455.1	g8525	KS-AT-DH-xCP-xCP-MT	MRSQSSHFAPSVAFFCPQSKAPTEAYLEQLQRYIVETPLLQPFAEAITSLRDTWNTLCKGHADIANLKSGERHVVSLERWMTNGIAGPVSSSMSGILALPLLVVIQICQYFQLLELHKLTHEQMLSSLRNGGGAQGYCGGLPTAFAISCAKDEEDVVRLATKALRLAFAVGAFGELGDDESIEGATTIAVRLRASQQGEELVEGIPGCYISAITDPRTISIVGPVIELMKVADRARDQGLLVTDIHIRGKVHNPENAPLVKVLFDLCQEHDEMTLPDASQLRVPVRSNLNGKLLDNCSLTYEAINTILASRCEWYRLLKEVAQDLAGSGTDSHTFALFGIGDPVPLMPFHNARLRVAKVEAHTAIQEARLAEYKYPEDAIAVTGVSCRLPRANDLEELW…
Alternaria_brassicae_BTP_GCA_036768455.1	g2130	SAT-KS-AT-PT-xCP	MIRAKVLYFSGEIPQGDPEGDQRDLFRKLHLLSKERSYPILALFLETITRAVKEEQRRLIRTERDSIPAFESILDLTDHVVELRKTSLGGAVERVLVLAFQLGSFIAYHEAHPLEYNFQSSDTFLIARGPGMLSAAAIALCPNVSMVPSIAGDIAKVAFRFGLVVDQVCRSLEISPDEINAAGAWIYCVYGVDPSEAEEAVALFNAEKEYAETSAASVFNDDGKSVSIGGPPSTLKTLFTECEFFKRTRNVPMKKVQGMWHTGKVYGTEHVRQVVPHIDEKHRLHLSLFSPVTGQPFKAANANELLEQIMEEMLTQRIRWDRTIQSVTEQLKQVSPNSTQLIAIQPSQYVESLLAQWKADIPTATHTAEDMMSAIMNLPLGSSPAKDAKSSKVAVVGMA…
Alternaria_brassicae_BTP_GCA_036768455.1	g1847	SAT-KS-AT-PT-xCP-xCP-Te	MNVLIFGDQTADQYPLLRKACTWKNNSTLTTFLDRVSQVVREEVQKLPRTQRDQIPNFLTTWDLIEAYYAKGLKIPQLESCMVTIAQLAHFIGYYAENPSDLQNPANTRVVGLCTGLLAGSVVASARSLSELLPLATEAVRIAFRTGTVVGAAKEAVEQASAPKETWSTIVTNMTEKAAKDAIAAFHEEQQTPTLAQAYISAVSTMALTISGPPATTKRLLQGDAFKGCARVAIPVYAPYHAAHFYSPADIDQILDKDAIRHLQQFRPLSLVHSATTGKCHTATSTLDLIRSALTEILVEPVRWDNLLTEVVSQVTATSSQDCSVSAIGVTTITNSLVSALRNGGQSSVTARDHTTWVAAEHDSRGRTQNDKIAIVGMSGRFPGAANPDALWDLLEKGL…
Alternaria_brassicae_J3_GCA_004936725.1	g5508	KS-AT-DH-ER-KR-xCP	MNNIVGSEESSISVSSRTNSVEPIAIVGFGFKFPQDITSAESLWKLLMERRSTMTEIPKNRWNIDGFYKEHGHRPGTVKNRGGHFLADDPARFDAPFFSIQPAEAECMDPQQRLLLETSYHALENAGIPMQAAMGTRTSVHVGCLLQEYSQISQRDAQMPGDYRIVGSSGLAMLANRLSWFYDFSGPSMTVDTACSGGLVAFHLACQELLAGSVDMSLVCGNNLCLLPDSTALLSALSMMSRDSVCYSFDERASGYARGEGFGVLILKRLNRAIADGDTIRGVVRSTGCGQDGNTPSITSPSQSAQERLIRETYARAGLDLGDTRYFEAHGTGTPVGDPCEAAAINSVFFSRTPEDPIFVGALKSNMGHPEGASGIAGVIKTLLVLEKGIIPPNVYPER…
Alternaria_brassicae_J3_GCA_004936725.1	g10827	KS-AT-DH-KR-xCP	MIRVQGAEIEFHGVNRTRHDTTSNDIAIVGLSCRTAGGIDNLDTLWNFLLQKKHASSEIPPNRWEPWRQRSALDAKIVGNITRKGYFLDDVEGFDAAFFGISPREAEHMDPHQRLGLELAYEALQNAGIQTDRLAGSDTAVYIGVDSDDYSRMVMEDLPAIEAWSGIGTAHHGVSNRISYHFDLKGPSAAVDAACASSLVALHLARQSIVAGESTVAICGGVNVICAPGITHMLQKAGALTEKGVCRSFDATADGYARGEGGAIIVLKRLSAAQEDNDNILAVLKSSASAQDGKTRNIMAPNGAAQADVARQALRRAGNIDPRTVDYVEAHATATRLGDPTEIKAMAEVYGAGRSREKPCYLGSIKPNVGHLEAAAGAISVVKTVLSVQKGVIAPQALL…
Alternaria_brassicae_J3_GCA_004936725.1	g6933	KS-AT-DH-KR-xCP	MIGNSVAKITSITRLVYSQHRRKNHKRLRDIALMVGQNDDLAGKMIARTEESFQDFDGAYGPQEPIAIVGVAIRLPGQVSNAQDLWQLMMEKKSGLVDVPKERWNIDGFHSEVPKPGTEIERLDPMQRQLLEIARECLDNAGEVNWRNKDIGCYVGQFSGDWLEENAMDPHVSGLYRGSGFADFFLPNRVSYEYGWTGPSMTIKTGCSASMVAVHQAAEALRNRSCSAAVVMSANLMTSPLTTVVYTEAGILSKTGKCKTFDASADGYGRGEAVNAVLVKRLSDAIRDGNPIRAILRGSATNHDGREGKSGMLNPNTLAHEALIRKAYKDAGIDDFSQTAFFECHGTGTPAGDPQEVAAVARVFGESGIVIGAVILESHIGSDETIVPRAAEPSRLRLL…
Alternaria_brassicae_J3_GCA_004936725.1	g11	KS-AT-DH-MT-ER-KR-xCP	MFGQASLQRAMFEDTKRNSTKPGSSDPISIVGMSCRFAGDTRSPSKLWDAMTTDQDSWSPIAGHCFDAKSLYHPDQQKTDRHHVKGGYFIGEDVNRFDAQFFSMSTEAASAAGIPLETISESNTSVFSAAFGRDYTDRLMKDPEAFPSSFITGNEPTMLSNRISHFFNLKGPSVTSNTSIIGAANCLLNPDFFIALSNLGVLSPEGRCYSWDDRADGYGRGEGVAVIVLKRLSSSLQDGDRIHAVIRGTATNQDGKTGTITTPSTIAQQTLIEDCYRRADLEPSDTGYIEAHMTGTAAGDPIEAAAIANVFGKSRSPGRPVYVGSIKPNIGHTESVSGLASIIKTALILQRQAIPADLNYITTNPDIPLERWNLHVPTTLTPWPQGMPLRASVNNFGYG…
Alternaria_brassicae_J3_GCA_004936725.1	g1618	KS-AT-DH-MT-ER-KR-xCP	MENSKTFESLNDEYVRIIESNENGSPAGEAFWDLLINQREGMIDIPSSRWNSEGFYDPRGRPGTIKVNQGNFLGSIDPADFDGSFFSMSAAQIAKVDPQHRVLLETTYEALENAGESDFRGKKVGVYVGMFADDFVEMQAKDTEPHEFLSLTGHLDLFGRCSASLVCLDQAFKALNAGDCDAAIVGGANLILSPALSGALGAQGVNSADGRCHSFDAKATGYGRGEAVSSLLVKRLDDAIRDGNPIRAIVRSTACNDDGKTPGITLPDTDAHEALIRAAYRTAGIPEEDFDKTGFFECHGTGTAVGDPIEVGAVARVFGKDGMIIGSVKSNIGHSEGASGNTSVIKAILAMEHHTIPPNVNFETPNPKIPWKEASLRVPTECMKWPSGRLERTSVNSFG…
Alternaria_brassicae_J3_GCA_004936725.1	g1790	KS-AT-DH-MT-ER-KR-xCP	MPASSFENAPQAEPLAIVGLATRFPQEASSTERLWQFLLAKKCAHTPIPVDRIGPGHYHPDPEHGGTHAVAGGHFLAEDPAYFDSSFFGITKGEAMSMDPQQRVVLENVYLALENSGLTLEDVRGSNTSVYVSGFNHDHLAILNSDPETTLRHRVTGLTNSMHSNRVSWFFDLKGPSVTIDTACSSSMAALHFGSQSLRTGESNIAIVTGVTILNYPGDVNGMSHQGFLSPDGRCFSFDHRANGFARGEGVGTVIVKRLSDAIRNGDTIRAIVRGTGINQDGRTPGLTLPSSDAQERLIRTTYASAGLDFDDTMLIEAHGTGTKQGDAIEARGIAQAFKSRRGNELLYLSSVKASVGHLEGAAGVAGLIKSVLALENGIIPPQANFERANPKIPFEKWN…
Alternaria_brassicae_J3_GCA_004936725.1	g2303	KS-AT-DH-MT-ER-KR-xCP	MSNPSVPIAIIGMSCHFAGGATDPEKLWELCAEGRTGWSEIPEDRFNIDGHYHPRPDNLNTTNVKGACFLDEDVGNFDATFFNLPAETAACLDPQFRLMLEGTYEAFENAGLTMDQVFGSNTSVYAGSFFKDYHDSGLRDVTTLPRFFLVGVGSAMASNRLSHYFDLRGASMSIDTGCSTTLTALHQACNDLRNHESNMSVVSGANLMLNPDMFITMSSIALISKDGRSFAFDSRANGYGRGEGAATIVLKRLDDAIRDGDPIQCVIKETGLNQDGKTETITTPSQAAQIELMRRVYKKAGLDPKDTGYFEAHGTGTPTGDPLEVGAIGAVFKDFKSTANPLPIGSIKPNVGHTECASGLASIVKVVKAIEKGLIPPAANLETINPKLKLAEWNLKIPR…
Alternaria_brassicae_J3_GCA_004936725.1	g676	KS-AT-DH-MT-ER-KR-xCP	MAYENTKPMPIAIVGFGCRFPGDVTNGEKLWEMLVEKKSARTEVPPGRFNVDAFYNPDRDRFGTCNNRGGHYLTEDVSLFDAPFFSISPAEAMAMDPMQRLLLEVTYEALENSGMPLERVSGSKTSCYVGCFTKDYEEMQRRDMELAPKYQSTGASQTMLSNRLSYFFNLKGPSVSIDTACSSGLVAVHLACQSLRTGESSMAIAGGSNLILSPDIQIEMSDMHFLSPDSISHAFDDRANGYARGEGVGAIILKPLDLALRDNDPIRAIIRGTAASSDGRTPGITMPSKDAQVDLIRSAYLAAEIDVSETGYFEAHGTGTAAGDPIESGAIGEVFAGNRPRRIIGTTEEVIPLSIGSVKTNMGHLEGASGIAGIIKAMLSVEKGVIAPNIWFDRGNPSI…
Alternaria_brassicae_J3_GCA_004936725.1	g4947	KS-AT-DH-xCP-xCP-MT	MRSRSSRSAPSVAFFCPQSKAPTEAYLEQLQKYIVETPLLQPFADAITSLRDTWSTLCEGHADIANLKSGERYVVNLERWITDGIAGPVSSSMSGILALPLLVIIQICQYFQLLELYGLTHEQMLSSLRNGGGAQGYCGGLPTAFVISCAKNEEDVVRLATRALRLAFAVGAFGELGDDESIEGATTIAVRLRASQQGGELVEGIPGCYISAITDPRTISIVGPVVELKKVADRARDQGLLVTDIHIRGKVHNPENAPLVKVLFDLCQEHDEMMLPDASQLLVPVRSNLNGKLLDNCSLTYEAIKTILASRCEWYQLLNEVAQDLARSSTDSHTFALFGIGDPVPLIPFHNARLRISKVEAHTAIQEARLAEYKYPEDAIAVTGVSCRLPRANDLEELW…
Alternaria_brassicae_J3_GCA_004936725.1	g2066	SAT-KS-AT-PT-xCP	MAPAKVLYFSGEIPQGDPEGDQRDLFRKLHLLSKERNYPILASFLETITWSMKEEQQRLIRIQRDLIPTYESILDLTDHVVELRKSSLGGAVERVLVLAFQLGSFIAYHEAHPLEYNFQPSDTFLIARGPGMLSAAAVALCPNMSMIPSIAGDIARVAFRFGLVVDQVCRSLEISPDEINAAGAWIYCVYGVDPHEADEAVARFNAEKAYAETSVASVFNDDGKSVSIGGPPSTLKTLFAECDFFKRKVYGMEHVQQIVPDMNQKHRLHLPLFSPVRGRPLEAANAKELLEQIMEEMLTRRIQWDRTIDNVTERLKQLSPDSTQLIAIQPSQYVESLLAQWRTDIPTATHTAEDMMSAIMNLPLGSSPAKDAKSSKIAVVGMACRFPGGADNTERFWEL…
Alternaria_brassicae_J3_GCA_004936725.1	g1805	SAT-KS-AT-PT-xCP-xCP-Te	MAPMTADQYPLLRKACTWKNNSTLTTFLDRVSQVVREEVQKLPRTQRDQIPNFLTTWDLIEAYYAKGLKVPQLESCMVTIAQLAHYIGYYAENPSDLQNPANTRVVGLCTGLLAGSVVASARSLSELLPLAIEAVRIAFRTGTVVGVAREALEQASSSKESWSYIVTNMTEKAAKDAIAAFHQAQGTPTSAQAYISAVSTMALTISGPPATTKRLLQGDAFKGCARVAIPVYAPYHAAHFYGEGDIDQILDKDAIRHLQQFRPPFAVLSPRFSSSRQDCLVSAIGVTSITNSLVSALRNGGQSSVTARDHTSWVAAEHDSRGRTQNDKIAIVGMSGRFPGAANPDALWDLLEKGLDVHREVPSDRFDAKAHCDPTGKGKNKSHTPFGCFIDEPGLFDPR…
Alternaria_brassicae_J3_GCA_004936725.1	g3954	SAT-KS-AT-xCP	MSQRFEPATAIPTESLILVTGVNGFLGCRFSNTPIERGYRVRGVMRDLERCSHVQAFFRKTTSLFGLGTGLLSAEAASVFANIADLAVASACIVRASFRLGVHVYNISEQLEAPEADGNPWAFVIPDLTAEAVQAELDRYNRDTTNPTLSQIFVSVSDKASISVSRPPSRLRQCLKSCDVLRYSSFMPLPVHHGLCHAPHIYTAVDVQAILEDILDDNQTRISRLKTQLPLLSSSTGRPYAAEDFRSLIDQVLTELLIKQIHIDNVVNSIIKVLDLSSATQQERNLFAFRNSIKLMFDKRDVHTTIPADRFDLNTYFDPTGQIENTTQTPYMNHINSPGLFDAGFFNISPKEAEQMDPMHRLALVTAYEALEMSGYSPNRTRSTSSPRAGTCYGQAGDH…
Alternaria_brassicae_J3_GCA_004936725.1	g2302	SAT-KS-AT-xCP-MT-Red	MGKPVVTLFGPLSPSLSQSNLNTLRATILSSSQYSWVNQVLTSLLSDYQSLVTECSDLYNKATETEIIGLAGWLKTGDLVLDRELIPNSLLAPLVVVTQLVQYSTFLDSHEFVPELPIVQETLGFCIGLLPAFAVSLSHQSTTAEFEQNAAAAVRLAMLVGCIVDQQHLRDPRGPSKTFSVAWKRVDSRDNRTELESILEKFQDEAYISVVYDTTRVSITSTVPVLEPLQHTLQDAGFTIKELGLSGRFHSRSDYQDQFESIMEFCDKNPAFKFPMSALRIPTRTHGDMMLKDQTSLHRSALQSILLQRCEWYNTVSELKSFYPSGPTSFVSFGERCIPSSLLGGFSGRLTHFDETISLDMRSNPNDVAVIGMSINVAGASSANEFWDLLASGKSQHQV…
Alternaria_brassicicola_Abra43_GCA_002796735.1	g800	KS-AT-DH-ER-KR-xCP	MPIFYESSSDASDAAPEFDLRNACQRIVTDDEYVVSSSTEPPLSQQLEPIAVVGMGCRLPGDVSSPSDFWRLMMEKRSGQTPKVPSSRFNIDAHFHPDNDRPGSFHVYGGYFINETLQEFDPAFFGITPVEATWMDPQQRKLLEVVYEAFESAGLTLDQLSGSDTACFMATFTADFQQMSFKEPSFRHSLAATGVDPGLLSNRVSHVFNLRGPSIVVNTACSSSVYALHNACNALRNHECSAAVVGGSNLILTVDQHMNTAKLGVLSPTSTCHTFNSYANGYGRAEGVGAIYLKRLSDAVKDGDPIRGVIRSSATNNNGRAPAVGITYPGFDGQRNVMMHAYQRSGLDPMLTGYFECHGTGTAIGDPLEVHAVSDVMNANRTEADGPLQMGAVKTNIGH…
Alternaria_brassicicola_Abra43_GCA_002796735.1	g4926	KS-AT-DH-MT-ER-KR-xCP	MENPTSKNLNDEYVCIIESNANGSPDGEAFWDLLVNQREGMIDIPSSRWNSEGFYDPHGRPGTIKVNQGNFLGSIDPADFDGNFFSMSAAQIAKVDPQHRVLLETTYEALENAGEGDFRGKKVGVYVGMFADDFVEMQAKDSEPHEFLSLTGHLDLFGSMFVPENLAFKALNAGDCDAAIVGGANLILSPALSGALGAQGVNSADGRCRSFDAKATGYGRGEAVSSLLVKRLDDALRDGNPIRAIVRSTACNDDGKTPGITLPNTDAHEALIRAAYRTAGISEEDFDKTGFFECHGTGTAVGDPIEVGAVARVFGKHGMVIGSVKSNIGHSEGASGNTSIIKAILAMEHHTIPPNVNFETPNPKKELRKPKLRSRISKAEFSQPLCTVIQIALVDLFRT…
Alternaria_brassicicola_Abra43_GCA_002796735.1	g6096	KS-AT-DH-MT-ER-KR-xCP	MNKPVAIIGISFRGPGDARDPEAFYRMLVEGRNARTEIPKDRYNVDAFYHPDSERLGSIQQRHAHFLQQDFKVFDAPFFGITPKEAMAMDPTHRILLEATYESFENAGLSLEQVSGTQTSCYIGTFTADFPNLQARDNEGPSIYHATGMSASLASNSLTAFHLACQSIRTGEAEMSVVGGANLMFGPDMSILLGAAKILSPEGKSKMWDANANGFARGEGFGVTILKPLDAALRDGNNIRAVVLATAANEDGHTPGISLPNSEAQQELIRRAYQMAGVDPAETAYVEAHGTGTQAGDPLEARAILNTVGSVEGRKSDLYVGSVKTNIGHLEGAAGVAGIIKAALTVERGMIPPNLWFEKLNPEIVLPDNVKIASKLTPWPHSGPRRASVNSFGFGGANA…
Alternaria_brassicicola_Abra43_GCA_002796735.1	g6229	KS-AT-DH-MT-ER-KR-xCP	MACEDTKPMPIAIVGFGCRFPGDITNGEKLWEMLVEKKSARTEVPPDRFNIDAFYNPDGDRFGTCNNRGGHYLTEDISLFDAPFFSISPAEAMAMDPMQRLLLEVTYEALENSGTSLARVSGSKTSCYVGCFTKDYEEMQRRDMELAPKYQSTGASQTMLSNRLSYFFNLKGPSVSIDTACSSGLVAVHLACQSLRTGESSMAIAGGSNLILSPDIQIEMSDMHFLSPDSISHAFDDRANGYVRGEGVGAIILKPLDLALRDNDPIRAVIRGTAASSDGRTPGITMPSKDAQIDLIRAAYRAAGIDVSETGYFEAHGTGTAAGDPIESAAIGEVFAADRPRHMSAATEEVVPLSIGSVKTNMGHLEGASGIAGIIKAMLSVEKGVIAPNLWFERGNPAI…
Alternaria_brassicicola_Abra43_GCA_002796735.1	g8880	KS-AT-DH-MT-ER-KR-xCP	MATDKTKPIAIIGMNMKFPGDAVSAQSFWELVMSARNVAKEIPSDRFNIDAFYHPDPNRLDSLRIRHAHFMEEDPRSFDAPFFNMSYAEASVLDPQQRGLLEGAYRTFENAGIPMETLSRSPTSVYCASFSRDGETITGRDFAAQSRYHATANGSSMLSNRVSHFFDLAGPSLTVDTACSSGLYALHLGVQSILAGESAMSLVCGANTFITPESQALALSNGGFLSVDGKSYSFDEKANGYARGEGFGFVLLKPLDAAVRDGDVVRAVIRATGANQDGRTPSITQPSQQAQFDLLRDTYRVAGLDVAQTDYVEAHGTGTPVGDPIEAAAIGEAFRHGRKSGRPLYVGSVKSNIGHLEGASGMAGVIKAVLALEKAMIPPIAMFEKTNPAIDAEGLQLAF…
Alternaria_brassicicola_Abra43_GCA_002796735.1	g2488	KS-AT-DH-MT-KR-xCP-Red	MDLAEQKDYLAAGRAGSYGVQLLALCMQSPIQHAFIDVLSARTLSTSLLFKQLQLCCPLTSRSSSSVRLLFKTPLMSPKAPVNEPIAIIGSGCRFAGGASSPSKLWDLLCNPKDIRSNITNKRFSAEGFYHPDGTHHGHMNVMQSYFLDEDTRVFDAEFFGINPVEAKAMDPQQRLLLEVVYESIESAGLSLGRMRGSDTAVFAGLMCGDYEAMMLRDLDQAPTHFATGTSRAVMSNRVSYFFDWRGPSVTIDTACSSSLVAVHQAIQTLRSGDSHTAVACGSNLIFGPEMYVIESKLKMLSPDSLSRMWDKDANGYARGEGVTAVVLKTLSQALADNDRIEAVIRETGVNSDGATPGITMPSASAQRNLIHSVYKKAGLNPQSAEGRPQFIEAHGTGT…
Alternaria_brassicicola_Abra43_GCA_002796735.1	g452	SAT-KS-AT-PT-xCP-xCP-Te	MNVLIFGDQTADQYPLLRKACTWKNNSTLTTFLDRVSQVVREEVQKLPRTQRDQIPNFLTTWDLIEAYYAKGLKVPQLESCMVTIAQLAHYIGYYAENPSDLQNPANTRVVGLCTGLLAGSVVASARSLSELLPLATEAVRIAFRTGTVVGAAKQALEQASSPKETWSTIVTNMTEKVAKDAIAAFHAEQRTPALAQAYISAVSTMALTISGPPATTKRLLQGDAFKGCVRVAIPVYAPYHAARFYGQVDVDQILDKDAIRHLQQFRPLSLVHSASTGQCHTATTTLDLIRAALTEILIEPVRWDNLLTEVVSQVTATSSQDCSVSAIGVTSITNSLVSALKNGGQSSVVGRDHTSWVAAEHDSRGRTQNDKIAIVGMSGRFPGAANPEALWDLLEKGL…
Alternaria_brassicicola_Altbr1_GCA_023079265.1	g5891	KS-AT-DH-ER-KR-xCP	MAQPVPNQGFDGSLMPVAIVGMSCRLPGDVSTLEEFWRLMSRARSGWSEIPADRFSKDAYWHPNPEKKGCFNNLGGYFLNQDLACFDAPFFNITAQEAQSLADRHFLASTDPQQRILLECAYEALENAGVPKESVIGSNTGVFVGGAASDYRLGNLRDADHTPMFDITGNHESILSNRISYYFDLRGPSCTVDTACSSSLYALHHAVQSIRAGESEQAIVAACHINLAPDDFVSMSMSRLFSEEGKTYAFDHRAKSGFARGEGAGCLILKPLDQAIRDNDRVRAVIVNTGVNQDGRTVGLSSPSGEAQERLMREVYAKANISPEDTGFVEAHGTGTKAGDPIEATAIHRVFGKGRTARQPLYFGSVKTNVGHLENASGLVSVIKAAMMLERGFILPNIN…
Alternaria_brassicicola_Altbr1_GCA_023079265.1	g5410	KS-AT-DH-KR-xCP	MANTSTSSNGAVPSSSNSSSFEVLSNPSSPSKSSFSSLNTILLKLFNSPSPPQMMPNFSTNSPQPAYEDVAIIGMACRAAGDNTTPEKLWQFLLDKKDASGEVPKKRWEPWYRRDVRNPKEIDKAINRGYFIENLENFDASFFGISPKEAEQMDPHQRLGLELSWEALENAGIDPKTLGGSDTAVYMGVDSDDYSRLLLEDIPNIEAWMGIGSTAHGIPNRISYHFDLMGPSSAVDAACASSLVAVHFGRQAIANGESQVAIVGGVNVLCSPALFVMLGKAGALSPDGVCLSFDDDAHGYARGEGGAVLVLKRLSDALADNDNVLAVLKGSALAQDGKTNGIMAPNAKAQELVARQALERSGVDPLSVGYIEAHATSTSLGDPTEVSAISAVYGKGRPV…
Alternaria_brassicicola_Altbr1_GCA_023079265.1	g5778	KS-AT-DH-KR-xCP	MADTTTPSTPYNRRSESSTPVFVGSPASELSEAGDLTNSEDVAVVGMACRVAGGNHSPEQLWESILAQRDASSEIPPWRWEPYQHRDSRNASELKKTTSRGYFLDALENFDPAFFGISPKEAEQMDPQQRLSLEVTWEALENAGIDPKALSGSDTAVFMGVNSDDYSKLLLEDLPNVDAWMGIGTAYCGVPNRISYHLNLMGPSTAVDAACASSLVAIHHGRQAILTGESKVAIVGGVNALCGPGLTRVLDKAGAISPDGSCLSFDDSAHGYGRGEGAAVVVLKKMGNAIRDGDNIIAVLKGSAVAQDGKTNGIMAPNAKAQELVARQALAAAKLDPTTIEYVEAHATSTPLGDPTEVSAIAAVYGANRSQPVSIGSVKPNVGHLEAGAGAVGFIKAVL…
Alternaria_brassicicola_Altbr1_GCA_023079265.1	g10563	KS-AT-DH-MT-ER-KR-xCP	MSFGPTSDQAPHHVGANLACRPLENGSCKDEDMPVAIVGMSCRLPGDANSPERLWRLCAEGRSGWSEIPDDRFNKEAFYHPSGSKRTTTNVTGGHFLKEDIGLFDATFFNLTPEVAATMDPQCRMLLESVYEALESAGITLEQVAGSETAVFAGAFFKDYTDSLMRDPETFPRYLLTGNGPTMMSNRISHFYDLRGPSMTVDTACSTGLVALHQACHSLRTGEAKMAIVGCANVMINPDIFVLMSSLGFLSPDGKSYAFDSRASGYGRGEGVGTLIVKRLRDAIRDGDPIRAVVRQTALNQDGKTQTITSPSQDAQEELIRRCYKSAGLNPADTVYVEAHGTGTQAGDPVEAGALHAVMGKDRPVDRPLHIGSVKTNVGHTETTSAIASIIKVALALEK…
Alternaria_brassicicola_Altbr1_GCA_023079265.1	g851	KS-AT-DH-MT-KR-xCP	MTTIQQPIAIIGSGCRFPGDSSSPSKLWELLRSPRDVLQDFPEERLKLSNFYNPNKGYHGTTDVKNKSYLLSEDCRLFDAAFFNTNPLEAASMDPAQRILLETVYETFEAAGYSMQQMQGSLTSVFVGLMSGDYWDITMRDTDTMPTYTAPGMCRSIMSNRISYVFDLRGPSMTIDTACSSSLVALHQAVQSLQSGESTTAVVAGANLLLDASTYIMETKLQMLSPDSRCRMWDKSADGYARGEGFAAILLKPLSAALADGDDIECVIRGTGVNSDGRTKGIAMPSAEAQATLIRETYKRAGLDPVTDRCHYFECHGTGTQAGDPIEARAIANTFFPENQDHGDERLYVGSVKTIIGHLEGCAGLAGVLKASLAMQNRTVPANMHFTTLNPNVEPFYKH…
Alternaria_brassicicola_Altbr1_GCA_023079265.1	g2014	KS-AT-DH-MT-KR-xCP-C-A-xCP-Red	MPRTPEPIAVVGSACRFPGSSTSPSKLWELLKQPRDVLSNIDRFKAKSFYHQNGHYHGASNVRQSYLLNDDPCAFDAQFFNIQAAEADSIDPQQRLLLESVYESIESAGLKLEDLQGSRTAVYVGVMCDDYAEIVYHDVESIPKYAATGSARSIMSNRISYFFDWHGPSMTIDTACSSSLVAVHQAVQVLRSGESNVAVAAGANLIFGPKMYIAESNLNMLSPTGRSRMWDANADGYARGEGIGAVVLKTLSAALADGDDIECIIRETGVNQDGRTPGITMPSASAQADLIAQTYARAGLDPRKETDRCQYFEAHGTGTKAGDPQEASAICEAFFGGAETPAGEVPLWVGSIKTVIGHTEGTAGIAGLLKASLAVQNKMIPPNMHFNRLNPDVAPYYSN…
Alternaria_brassicicola_Altbr1_GCA_023079265.1	g5752	SAT-KS-AT-DH-xCP-xCP-xCP-MT	MTLSKLRQQSSAAIFCPQSKAPEKSYLDQLQKFLVEHEQLQRLAEDVKRLQETWDTIAGRREDIAALTQGPRYTRALHDWVEEGASAPVANAMSGILSLPLLVVIQTCQYFQYLQLAGLTHAEFLDGLKTGGAQGYCGGLLPAMAIACAKDEDEVVTMAAVAMRIALAVGAYGELGDDQNLPGPTTIVVRLRQEGQGEDIVRKFPGSYVSAVTDPKTISIVGPVPTLEAVSAYARERGLLVQGMHLRGKVHNPENAELAKELCELCDEFESLTLPACSELQVPVYSNITGRRLRDCSLTHEAVRTILASRCEWWTLLNELAQALKATGTQSHTFAMFGIGDCVPLMPFHQATLKISKIDVHRTIREAELKDYKLPEDAIAVVGAACRLPGANSLEELWD…
Alternaria_brassicicola_Altbr1_GCA_023079265.1	g7119	SAT-KS-AT-PT-xCP	MPIYTPPYDSQDESQEMRLVYFSNEFPHDDLQDLFRRLYNLSKDKRHPILARFINEATSAIRDEVRELPTSLRELIPPFSTVLDLADHPELRKGPLCGSIDGVLLCVVELATIIRYYENSPNEFDLHSGHTYLAGLGIGLLATAAVSLAQTLAELPLVGAEVARVAFRLGVVVHEVSQNLEPRDLSGSLDAWASVVPGVKAEDVQAELDAVKARENIPEPSKIFISALNQTSVTVSGPPSRLKHLFRTSEFFRGHKVVTLPVFGGLCHAKHIYNRQHVHEVIDVSSLNELDATYAPALPIFSTSTGNQYTATTAKDLFEQIIWEILTQQIQWDNVIQGVVDQANSIAASSCQVLVFRNSIPVHDLLASLKSNLDPFEAVTEELIPWVKKSFPGEGTPRG…
Alternaria_brassicicola_Altbr1_GCA_023079265.1	g1069	SAT-KS-AT-PT-xCP-xCP-Te	MNVLIFGDQTADQYPLLRKAVLRKDNALLSTFLERASVTLRNETKRLPRSQRESIPDFLSLSSLIEAYYEKGLKVPQIESALVTIAQLSHYIGYFGENPTELPSLANTRALGLCTGLLAASAVASARTLSDLLPLAIEAVRIAFRTGAVVGNVRDALEHIQEEPQSWSTIVAGISEESAKTALADFHQEKGIALSNQAWVSAVSVMAITISGPPATTQRFFAESEAVKGKTRVPIPVYAPYHAAHLHSQADVDSILDSEARELLSQYRPQCLVHSSVTGQCHSATSTLELFQLALGEILQEPVRWDRLLEEVVSQVTEFSKSECSVTAVGVTNVANSLVSALRAGGQTAITGRDQSSWARPAETGTGRTQNDKIAIVGMSGRFPSAANAEKLWELLEAG…
Alternaria_brassicicola_Altbr1_GCA_023079265.1	g8915	SAT-KS-AT-PT-xCP-xCP-Te	MVYRDILLFAGQGSSLFGSDHVNTRTADILASSHTANSLLKACHEALITELDTLDDNDKRVLPDDMRSSLSTPESLVDPPSRLCSNPVVQGTTLFIHQMLEFIAYESALNSPPELAETSGFCSGVLAAIVTASSLSPRSPDFVDTAVHAYRLSFWIGLRNGLFCRRVIGGSRDGSSWSLTVLGMPAHELEGLVNEYNKAQNQTPPIRIAAVLSEKAFSLTGPGTALDDFRANGLPKSTPSLPANVHGYYHGGPLLHDTQRQIMVDVQRRGINFPAWEALKVPVRSTCDGEYLNAADHGVSLLEAALRSILVQPVDWWLASQKLVSFANARLDEDINLSYRILALGPNAKSLLRALKENKSHDRLHIADGVSNVDSEPSPNDIAIVGMSANFPRGKGTAE…
Alternaria_burnsii_CBS107.38_GCA_013036055.1	g5519	KS-AT-DH-ER-KR-xCP	MNGFIDPEGTFMPASSPNVLVPIAIVGFGFKFPQDITNAESLWKLLMERRSTMTEIPQNRWNIDGFYKEHGHRPGTVKNRGGHFLADDPARFDAPFFSVQPAEAECMDPQQRLLLETSYHALENAGIPMKAAMGTRTSVHVGCLLQEYSQISQRDSQMPGDYRIVGSSGLAMLANRLSWFYDFSGPSMTVDTACSGGLVAFHLACQELSAGSVDMSLVCGNNLCLLPDSTALLSSLNMMSKDSVCYSFDERASGYARGEGFGVIILKRLDTAIADGDTIRGVVRSTGCGQDGNTPSITSPSQSAQERLIRETYARAGLDLGDTRYFEAHGTGTPVGDPCEAAAISNVFSCRTPEDPIFVGALKSNMGHPEGASGIAGVIKTLLVLEKGIIPPNVYPEHI…
Alternaria_burnsii_CBS107.38_GCA_013036055.1	g10772	KS-AT-DH-MT-ER-KR-xCP	MNKPVAIIGIAFRGPGDARDPEAFYRMLVEGRHARTEIPKDRYNVDAFYHPDAERLGSIQQRHAHFLQQDFKVFDAPFFSITPKEAKAMDPTHRILLEATYEGFENAGLSLENISGTQTSCYIGTFTADFPNLQARDNEGPSIYHATGMSASLASNRLSWFYNLRGPSLTVDTACSSSLTAFHLACQSIRTGEAEMSVVGGANLMFGPDMSILLGAAKILSPEGKSKMWDANANGFARGEGFGVTILKPLDAALRDGDNIRAVVLATAANEDGHTPGISLPNSEAQQELIRSAYKMAGVDPAETGYVEAHGTGTQAGDPLEARAILKTVGSVEGRKSDLYVGSVKTNIGHLEGAAGVAGIIKAALTIERGMIPPNLWFEKLNPEIDLPENVKIATKLTP…
Alternaria_burnsii_CBS107.38_GCA_013036055.1	g4898	KS-AT-DH-MT-ER-KR-xCP	MASKKISNSCTSLPLDHLSNFSEADNEDIHYTISMLYQSTNGTNGIDGFHDSNGDNNVHGTNGHRSGDDQSTNSDDMSNSIAIVGISCKFGGAASNLDGLWHTLANGESCWSPIPKSRFDVSNTYHPDPLRTNSLHVKGGFFIKEDLAEFDAPFFNLTAEAAKAMDPQLRLLLEGVYQATEDAGIPTEKLSGSNTSVFSASFGRDYTEMLMKDADALPTSLVTGNGPAMFANRVSHFYNLRGPSVTVDTGCSGGLVALHMGVNSIRNQESDVSIVGASNAILNQDFFIAISNLGLLHEDGKCYSMDHRWGGYGRGEGMAVLVLKKFSAAVKDGDHIHAVIRESAVNQDGRTGTITSPSMDAQRSLIQQCYSRAGIDLASTGYVEAHLTGTGGDAIEAEA…
Alternaria_burnsii_CBS107.38_GCA_013036055.1	g8135	KS-AT-DH-MT-ER-KR-xCP	MASSMKSEPIAIIGMSCRFPGGASEPARLWDVLSSGQSAWSEVPKDRFNMEAFHLEGDPHSSTTNTPGGHFLDSDVATFDCSFFEIKPTEARAMDPQQRLTLELAYEAFENAGFTVSQIWGSSTGVYIGQWSSDYSEIMARDPENQELYHTLGTGAAITSNRVSFFFNLRGPSFTVDTGCSASLVALHNAVQSLRSGESTMSLVGGVNVLLDPQRFTYQSKLKMFSPDGRSFSFDERANGYGRGEGCGCVVLKPLSLAIKDGNAIRAVIRNSALNQDGRTPQGISVPNGEAQEELIRRAYAEAGLVPAETDYVEAHGTGTAVGDPIEAKAIANVLARPREATQGPLIMGSVKGNIGHTESAAGIAGLIKSVLMLENQAVAPQVNYEKPNPKIPLHIWNL…
Alternaria_burnsii_CBS107.38_GCA_013036055.1	g8902	KS-AT-DH-MT-ER-KR-xCP	MNTKRMTPIAIIGMNMKFPGDAVSAQAFWELLMSARNVSKEIPSDRFNIDAFYHPDPNRLDSLRIRHAHFMEEDPRSFDAPFFNMSYAEASVLDPQQRGLLEGAYRTFENAGIPMETLSRSPTSVYCASFSRDGETITGRDFAAQSRYHATANGSSMLSNRVSHFFDLAGPSLTVDTACSSGLYALHLGVQSILTGESAMSLVCGANTFITPESQALALSNGGFLSVDGKSYSFDGKANGYARGEGFGFVLLKPLEAAIRDKDVIRAVIRATGANQDGRTPSITQPSQQAQLDLLRDTYRVAGLDVADTDYVEAHGTGTPVGDPIEAAAIGEAFRDGRKSGRPLYVGSVKSNIGHLEGASGMAGVIKAVLALEKAVIPPIAMFEKTNPAIDTEYLQLAF…
Alternaria_burnsii_CBS107.38_GCA_013036055.1	g9163	KS-AT-DH-MT-ER-KR-xCP	MEPIAIVGLAYKLPQDIEDEASFWRILEQGQSVMTEWPKSRVDANAFARSPEAALNTLNSTRGHFLEQNLASFDAPFFSISSKEASAMDPQQRMLLETSYHALENAGIPLSRIAGTETGVFVGTMESDYHRMISKDPDDAPMTTATGISVSIMANRLSWYFDLKGPSMQLNTACSSSMIAVDLGCQSIRSGQTSTVLVAGSSLMLDPEYSLYLSNMNMLSPDGICHSFDDRANGYSRGEGVIVMILKKLSTAILDGDNIRAVIRGTGSNQDGRTPGITQPSSVSQENLIRYTYRTCNLGFESTRYIEAHGTGTQIGDAMEMRALGAVFRTARSPKAPLFVGSVKTNIGHLEGGSGLAGIAKSILILEKGFIPPNALFERLNTKVNAKRHNIQVPGSCIR…
Alternaria_burnsii_CBS107.38_GCA_013036055.1	g813	KS-AT-DH-MT-KR-xCP-Red	MSPNAPINEPIAIIGSGCRFAGGASSPSKLWDLLRDPRDIRSNITDKRFNAEGFYHPDGTHHGHMNVMQSYLLDEDTRVFDAEFFGINPVEAKAMDPQQRLLLEVVYESIESAGLSLDRMRGSDTAVFAGLMCGDYEAMMLRDLDQAPTHFATGTSRAVMSNRVSYFFDWRGPSVTIDTACSSSLVAVHQAIQTLRSGDSHTAVACGSNLIFGPEMYVTESKLKMLSPDSLSRMWDKDANGYARGEGVTAVVLKTLSQALADNDRIEAVVRETGVNSDGATPGITMPSASAQRDLIHSVYKKAGLDPQCAEDRPQFIEAHGTGTPAGDPIEAEALSTAFFSNTEKLSSPIYTGSIKTVLGHTEGSAGIAALLKVTQAMQNSTIPPNLWFQQLNPKLEPF…
Alternaria_burnsii_CBS107.38_GCA_013036055.1	g4021	KS-AT-DH-xCP-xCP-MT	MAQNPDLNGIAIVGMGCKFPGADSIEEYWNLLDAGRSMVTEPPKGRFPSHEHGRSTDRSVFSGNYIDDIESFDNRFFKKSGREAASMDPQQRLLLEVAYQALESAGFFGPREQDLDVGCFVGVCASDYNDNVASHPANAFSTLGTLRAFLTGRVSHFFGLTGPSITYDTACSSSAVAIDAACKAIAHGDCTSALAGGVSLLTSPHFFQNLAAASFLSPTGPTKSFDARADGYCRGEGIGLVVLKKLSQAIHDGDHIFGTILATSVKQSSNKVPITVPYSPSHTALYRQVLRMAGVAAEDVTYLEAHGTGTPIGDVIEFDALRATFASKQRKQPLYVGSVKSNIGHTESTSGVASLIKTLLMMQKRQIPGQANYSTPNTKIDLSKGQFVIPTQTQYWAAD…
Alternaria_burnsii_CBS107.38_GCA_013036055.1	g2555	SAT-KS-AT-PT-xCP	MIRAKVLYFSGEIPQGDPEGDQRDLFRKLHLLSKERSYPILALFLETITRAVREEQRRLIRTERDSIPAFESILDLTDHVVELRKTSLGGAIERVLVLSFQLGSFIAYHEAHPLEYNFQSSDTFLIARGPGMLSAAAITLCPNMSMVPSIAGHIAKVAFRFGLVVDQVCRSLEISPDEINAAGAWIYCVYGVDPSEAQEAVALFNAEKEYAETSVASVFNDDGKSVSIGGPPSTLKALFTECEFFKRTRNVPMKKVQGMWHTGKVYGMEHVQQIVPYIDEKYRLHLSLFSPVTGQPFKAASANELLEQIMEEMLTQRIRWDRTIQSITERLKQVSPNSTQLIAIQPSQYVESLLAQWKADIPTATHTSEDTMSAIMNLPLGSSPSKDAKSSKIAVVGMA…
Alternaria_burnsii_CBS107.38_GCA_013036055.1	g2830	SAT-KS-AT-PT-xCP-xCP-Te	MNVLIFGDQTADQYPLLRKACTWKNNSTLTTFLDRVSQVVREEVQKLPRTQRDQIPNFLTTWDLVEAYYAKGLKIPQLESCMVTIAQLAHFIGYYAENPSDLQNPANTRVVGLCTGLLAGSVVASARSLSELLPLATEAVRIAFRTGTVVGAAKEAVEQASAPKETWSTIVTNMTEKAAKDAITAFHEEQQIPTLAQAYISAVSTMALTISGPPATTKRLLQGDAFKGCARVAIPVYAPYHAAHFYGSADIDQILDKDAIRHLQQFRPLSLVHSATTGKCHTATSTLDLIRSALTEILVEPVRWDNLLTEVVSQVTATASQDCSVSAIGVTTITNSLVSALRNGGQSSVTARDHTTWVAAEHDSRGRTQNDKIAIVGMSGRFPGAANPDALWDLLEKGL…
Alternaria_burnsii_HNLF_44_GCA_021613345.1	g7457	KS-AT-DH-ER-KR-xCP	MNDFIDPEGTFMPASSPNGLVPIAIVGFGFKFPQDITNAESLWKLLMERRSTMTEIPQNRWNIDGFYKEHGHRPGTVKNRGGHFLADDPARFDAPFFSVQPAEAECMDPQQRLLLETSYHALENAGIPMKAAMGTRTSVHVGCLLQEYSQISQRDSQMPGDYRIVGSSGLAMLANRLSWFYDFSGPSMTVDTACSGGLVAFHLACQELSAGSVDMSLVCGNNLCLLPDSTALLSSLNMMSKDSVCYSFDERASGYARGEGFGVIILKRLDTAIADGDTIRGVVRSTGCGQDGNTPSITSPSQSAQERLIRETYARAGLDLGDTRYFEAHGTGTPVGDPCEAAAISNVFSCRTPEDPIFVGALKSNMGHPEGASGIAGVIKTLLVLEKGIIPPNVYPERI…
Alternaria_burnsii_HNLF_44_GCA_021613345.1	g2516	KS-AT-DH-MT-ER-KR-xCP	MNKPVAIIGIAFRGPGDARDPEAFYRMLVEGRHARTEIPKDRYNVDAFYHPDAERLGSIQQRHAHFLQQDFKVFDAPFFSITPKEAKAMDPTHRILLEATYEGFENAGLSLENISGTQTSCYIGTFTADFPNLQARDNEGPSIYHATGMSASLASNRLSWFYNLRGPSLTVDTACSSSLTAFHLACQSIRTGEAEMSVVGGANLMFGPDMSILLGAAKILSPEGKSKMWDANANGFARGEGFGVTILKPLDAALRDGDNIRAVVLATAANEDGHTPGISLPNSEAQQELIRSAYKMAGVDPAETGYVEAHGTGTQAGDPLEARAILKTVGSVEGRKSDLYVGSVKTNIGHLEGAAGVAGIIKAALTIERGMIPPNLWFEKLNPEIDLPENVKIATKLTP…
Alternaria_burnsii_HNLF_44_GCA_021613345.1	g6379	KS-AT-DH-MT-ER-KR-xCP	MNTKTTPIAIIGMNMKFPGDAVSAQAFWELLMSARNVSKEIPSDRFNIDAFYHPDPNRLDSLRIRHAHFMEEDPRSFDAPFFNMSYAEASVLDPQQRGLLEGAYRTFENAGIPMETLSRSPTSVYCASFSRDGETITGRDFAAQSRYHATANGSSMLSNRVSHFFDLAGPSLTVDTACSSGLYALHLGVQSILTGESAMSLVCGANTFITPESQALALSNGGFLSVDGKSYSFDEKANGYARGEGFGFVLLKPLEAAIRDKDVIRAVIRATGANQDGRTPSITQPSQQAQLDLLRDTYRVAGLDVADTDYVEAHGTGTPVGDPIEAAAIGEAFRDGRKSSRPLYVGSVKSNIGHLEGASGMAGVIKAVLALEKAVIPPIAMFEKTNPAIDTEYLQLAFP…
Alternaria_burnsii_HNLF_44_GCA_021613345.1	g6401	KS-AT-DH-MT-ER-KR-xCP	MASKKISISCTSLPFDHLSNFSEADNEDIHYTITMLYQSTNGTNGIDGCHDSNGDNNVHGTNGHRSGDDQSTNSDDMSNSIAIVGISCKFGGAASNLDGLWHTLANGESCWSPIPKSRFDVSNTYHPDPLRTDSLHVKGGFFIKKDLTEFDAPFFNLTAEAAKAMDPQLRLLLEGVYQATEDAGIPTEKLSGSNTSVFSASFGRDYTEMLMKDADALPTSLVTGNGPAMFANRVSHFYNLRGPSVTVDTGCSGGLVALHMGINSIRNQESDVSIVGASNAILNQDFFIAISNLGLLHEDGKCYSMDHRWGGYGRGEGMAVLVLKKFSAAVKDGDHIHAVIRESAVNQDGRTGTITSPSMEAQRSLIQQCYSRAGIDLASTGYVEAHLTGTGGDAIEAEA…
Alternaria_burnsii_HNLF_44_GCA_021613345.1	g9641	KS-AT-DH-MT-ER-KR-xCP	MEPIAIVGLAFKLPQDIEDEASFWHILEQGQSMMTEWPKSRVDVNAFARSPEASLNTLTSTRGHFLRQNLASFDAPFFSISSKEASAMDPQQRMLLETSYHALENAGIPLSRIAGTETGVFVGTMESDYHRMISKDPDDAPMTTATGISVSIMANRLSWYFDLKGPSMQLNTACSSSMIAVDLGCQSIRSGQTSTVLVAGSSLMLDPEYSLYLSNMNMLSPDGICHSFDDRANGYSRGEGVIVMILKKLSTAISDGDNIRAVIRGTGSNQDGRTPGITQPSSVSQENLIRHTYRTCNLGFESTSYIEAHGTGTQIGDAMEMRALGAVFRTARSPKAPLFVGSVKTNIGHLEGGSGLAGIAKSILILEKGFIPPNALFERLNTKVNAKRNNIQVPESCIR…
Alternaria_burnsii_HNLF_44_GCA_021613345.1	g5775	KS-AT-DH-xCP-xCP	MAQNPDLNGIAIVGMGCKFPGADSIEEYWNLLDAGRSMVTEPPKGRFPSHEHGRSTDRSVFSGNYIDDIESFDNRFFKKSGREAASMDPQQRLLLEVAYQALESAGFFGPREQDLDVGCFVRVCASDYNDNVASHPANAFSTLGTLRAFLTGRFSHFFGLSGPSITYDTACSSSAVAIDAACKAIAHGDCTSALAGGVSLLTSPHFFQNLAAASFLSPTGPTKSFDARADGYCRGEDIGLVVLKKLSQAIHDGDHIFGTILATSVKQSSNKVPITVPYSPSHTALYRQVLRMAGVAAEDVTYLEAHGTGTPIGDVIEFDALRATFASKQRKQPLYVGSVKSNIGHTESTSGVASLIKTLLMMQKRQIPGQANYSTPNTKIDLSKGQFVIPTQTQYWAAD…
Alternaria_burnsii_HNLF_44_GCA_021613345.1	g645	KS-AT-DH-xCP-xCP-MT	MRSQSSHFAPSVAFFCPQSKAPTEAYLEQLQRDTWNTLCKGHADIASLKSGERHVVSLERWITDGIAGPVSSSMSGILALPLLVVIQICQYFQLLELHKLTHEQMLSSLRNGGGAQGYCGGLPTAFAISCAKDEEDVVRLATKAFRLAFAVGAFGELGDDESIDGATTIAVRLRVSQQGEELVEGIPGCYISAITDPRTISIVGPVVELMKVADRARDQGLLVTDIHIRGKVHNPENAPLVKVLFGICQEHDEMTLPDASQLRVPVRSNLNGKLLENCSLTYEAINTILASRCEWYRLLKEVAQDLAGSGTDSHTFALFGIGDPVPLMPFHNARLRVAKVEAHTAIQEARLAEYKYPEDAIAVTGVSCRLPQANDLEELWQLLAAGTSTCEEIRHDRVP…
Alternaria_burnsii_HNLF_44_GCA_021613345.1	g2987	SAT-KS-AT-PT-xCP	MPSSSSWDSIEDPKPSLLFFNNDLPSDDINYLYRVLHRCSAQLSCPQLAHFITLCNKVITEEIAKLPKHWQENVPDFVNVLSLVNDNAFRKGPLGGAMEGVFLNILQVGMILGHHEVEQIPYQFNPKTTMLFGLGTGLLSAAAASVSLNIADLAVAGAHIVRASFRLGIHVYNISEQLEAPDPEGNPWAFVIPGLAAEVVQTELDRYNRDTANPTLSHIFISASDKASVSVSGPPSRLRHCLKSCDVLRYSNFMPLPVHHGLCHAPHIYSAVDVQAIIEDTLDDDHTRIAGLNTSLPLLSSSTGRPYTAKDFRSLIDQILAELLMNKIQIDNIVDGIIEVLDLPLACQQERNLFAFRNSVVLRTMMKNVEKQCDSRIAFTHRDLVEWTKREESDAETSI…
Alternaria_burnsii_HNLF_44_GCA_021613345.1	g7022	SAT-KS-AT-PT-xCP	MIRAKVLYFSGEIPQGDPEGDQRDLFRKLHLLSKERTYPILALFLETITRAVKEEQRRLIRTERDSIPAFESILDLTDHVVELRKTSLGGAVERVLVLSFQLGSFIAYHEAHPLEYNFQSSNTFLIARGPGMLSAAAIALCPNVSMVPSIAGDIAKVAFRFGLVVDQVCRSLEISPDEINAAGAWIYCVYGVGPSEAQEAVALFNAEKEYAETSVASVFNDDGKSVSIGGPPSTLKALFTECEFFKRTRNVPMKKVQGMWHTGKVYGMEHVQQVVPYIDEKYRLHLSLFSPVTGQPFKAASANELLEQIMEEMLTQRIQWDRTIQSITERLKQVSPNSTQLIAIQPSQYVESLLAQWKVDIPTATHTSEDTMSAIMNLPLGSSPAKDAKSSKIAVVGMA…
Alternaria_burnsii_HNLF_44_GCA_021613345.1	g7297	SAT-KS-AT-PT-xCP-xCP-Te	MNVLIFGDQTADQYPLLRKACTWKNNSTLTTFLDRVSQVVREEVQKLPRTQRDQIPNFLTTWDLVEAYYAKGLKIPQLESCMVTIAQLAHFIGYYAENPTDLQNPANTRVVGLCTGLLAGSVVASARSLSELLPLATEAVRIAFRTGTVVGAAKEAVEQASAPKETWSTIVTNMTEKAAKDAITAFHEEQQIPTLAQAYISAVSTMALTISGPPATTKRLLQGDAFKGCARVAIPVYAPYHAAHFYGSADIDQILDKDAIRHLQQFRPLSLVHSATTGKCHTATSTLDLIRSALTEILVEPVRWDNLLTEVVSQVTATASQDCSVSAIGVTTITNSLVSALRNGGQSSVTARDHTTWVAAEHDSRGRTQNDKIAIVGMSGRFPGAANPDALWDLLEKGL…
Alternaria_cf._alternata_R_IC_06_P1_GCA_020284155.1	g1099	KS-AT-DH-ER-KR-xCP	MNDFIDPEGTFMSASSHNGVVPIAIVGFGFKFPQDITNAESLWKLLMERRSTMTEIPQNRWNIDGFYKEHGHRPGTVKNRGGHFLADDPARFDAPFFSVQPAEAECMDPQQRLLLETSYHALENAGIPMKAAMGTRTSVHVGCLLQEYSQISQRDSQMPGDYRIVGSSGLAMLANRLSWFYDFSGPSMTVDTACSGGLVAFHLACQELSAGSVDMSLVCGNNLCLLPDSTALLSSLNMMSKDSVCYSFDERASGYARGEGFGVLILKRLDTAIADGDTIRGVVRSTGCGQDGNTPSITSPSQSAQERLIRETYARAGLDLGDTRYFEAHGTGTPVGDPCEAAAISNVFSCRTPEDPIFVGALKSNMGHPEGASGIAGVIKTLLVLEKGIIPPNVYPERI…
Alternaria_cf._alternata_R_IC_06_P1_GCA_020284155.1	g10128	KS-AT-DH-MT-ER-KR-xCP	MSSQYGTNGTSADPEPIAIVGMGCRWPGGVRDASGLWELLKNKRSGYREFGDHRFSRKGFHHPNSEHPGTVATEGGFLLAEDPRLFDHAFFGIGSLEVETMDPSQRKLLEVVYEAFENSGEPWDSFSGSITGVFVGNFSSDHLIIQGRDTDHPRPYASVGTGTSILSNRVNYIFNLRGPSVTIDTACSSSMYALHLAISAIRNGDCDSAIVAASNTIIDPSTQLMMTKLGVLSPTSTSHTFDSSADGYARGEGFSALYLKRMSTAVDGDYPIRALVRGSALNANGRTGGITHPGREGQEAVIRKAYENAGNLPMKDTTFFECHGTGTPVGDPIEISAIGNVFGSATTPEKPLLVGSIKTNIGHTEPASAIAGVMKVVLALENGFIPPSIGIKKLNPKLD…
Alternaria_cf._alternata_R_IC_06_P1_GCA_020284155.1	g1603	KS-AT-DH-MT-ER-KR-xCP	MATDRTTPIAIIGMNMKFPGDAVSAQAFWELLMSARNVSKEIPSDRFNIDAFYHPDPNRLDSLRIRHAHFMEEDPRSFDAPFFNMSYAEASVLDPQQRGLLEGAYRTFENAGIPMETLSRSPTSVYCASFSRDGETITGRDFAAQSRYHATANGSSMLSNRVSHFFDLAGPSLTVDTACSSGLYALHLGVQSILAGESAMSLVCGANTFITPESQALALSNGGFLSVDGKSYSFDEKANGYARGEGFGFVLLKPLEAAIRDKDVIRAVIRATGANQDGRTPSITQPSQQAQLDLLRDTYRVAGLDVADTDYVEAHGTGTPVGDPIEAAAIGEAFRDGRKSDRPLYVGSVKSNIGHLEGASGMAGVIKAVLALEKAVIPPIAMFEKTNPAIDTEYLQLAF…
Alternaria_cf._alternata_R_IC_06_P1_GCA_020284155.1	g3886	KS-AT-DH-MT-ER-KR-xCP	MEPIAIVGLAFKLPQDIEDEASFWHILEQGQSMMTEWPKSRVDVNAFARSPEASLNTLTSTRGHFLKQNLASFDAPFFSISSKEASAMDPQQRMLLETSYHALENAGIPLSRIAGTETGVFVGTMESDYHRTISKDPDDAPMTTATGISVSIMANRLSWYFDLKGPSMQLNTACSSSMIAVDLGCQSIRSGQSSTVLVAGSSLMLDPEYSLYLSNMNMLSPDGICHSFDDRANGYSRGEGVIVMILKKLSTAISDGDNIRAVIRGTGSNQDGRTPGITQPSSVSQENLIRHTYRTCNLGFESTRYIEAHGTGTQIGDAMEMRALGTVFRTARSPRAPLFVGSVKTNIGHLEGGSGLAGIAKSILILEKGFIPPNALFERLNTKVNAKRNNIEVPASCIR…
Alternaria_cf._alternata_R_IC_06_P1_GCA_020284155.1	g6393	KS-AT-DH-MT-ER-KR-xCP	MNKPVAIIGIAFRGPGDARDPEAFYRMLVEGRNARTEIPKDRYNVDAFYHPDAERLGSIQQRHAHFLQQDFKVFDAPFFSITPKEAKAMDPTHRILLEATYEGFENAGLSLEKVSGTQTSCYIGTFTADFPNLQARDNEGPSIYHATGMSASLASNRLSWFYNLRGPSLTVDTACSSSLTAFHLACQSIRTGEAEMSVVGGANLMFGPDMSILLGAAKILSPEGKSKMWDANANGFARGEGFGVTILKPLDAALRDGDNIRAVVLATAANEDGHTPGISLPNSEAQQELIRRAYQMAGVDPAETGYVEAHGTGTQAGDPLEARAILNTVGSVEGRRSDLYVGSVKTNIGHLEGAAGVAGIIKAALIVERGMIPPNLWFEKLNPEIDLPENVKIASKLTP…
Alternaria_cf._alternata_R_IC_06_P1_GCA_020284155.1	g3922	KS-AT-DH-MT-KR-xCP-C-A-xCP-Red	MSNLEPIAIVGSACRFPGDSDTPSKLWQLIKSPRDLLRQVPEERFDAEAFYHPDSKHHGTTNAIKSYFLDEDPALFDNGFFNIPQSEAEAVDPQQRLLMETVYDSLCAAGQTIEELRGSSTAVYVGLMCDDWAGILAQDPDVLPQYGATGMARSIMSNRISYFFDWHGPSMTIDTACSSSLVAVHQAIQTLRSGESQVAIAAGANLILTPGMYIAESKLSMLSPSGRSRMWDKDIDGYARGEGIAAVVLKPLSAAIRDNDHIECLIRGTGVNQDGRTNGITMPSATAQAALIRDTYARAGLDVNKPEDRPQFFHAHGTGTAAGDPQEAEAISKAFYSTNDCDETLYVGSIKTVIGHTEGTAGLASLISTSLALQHKVIPPNMHFNTLNPRLKPFYDHLE…
Alternaria_cf._alternata_R_IC_06_P1_GCA_020284155.1	g10042	KS-AT-DH-MT-KR-xCP-Red	MNEPIAIIGSGCRFAGGASSPSKLWDLLRDPKDIRSNITDKRFNAEGFYHPDGTHHGHMNVMQSYLLDEDTRVFDAEFFGINPVEARAMDPQQRLLLEVVYESIESAGLSLDRMRGSDTAVFAGLMCGDYEAMMLRDLDQAPTHFATGTSRAVMSNRVSYFFDWRGPSVTIDTACSSSLVAVHQAIQTLRSGDSHTAVACGSNLIFGPEMYVIESKLKMLSPDSLSRMWDKDANGYARGEGVTAVVLKTLSQALADNDRIEAVVRETGVNSDGATPGITMPSANAQRDLIHSVYKKAGLNPLSAEDRPQFIEAHGTGTPAGDPIEAEALSIAFFSNTEKSSSPINTGSIKTVIGHTEGSAGIAALLKVTQAMQNSTIPPNLWFQQLNPKLEPFYGNLQI…
Alternaria_cf._alternata_R_IC_06_P1_GCA_020284155.1	g5741	SAT-KS-AT-DH-xCP-xCP-MT	MRSQSSHFAPSVAFFCPQSKAPTEAYLEQLQRDTWNTLCKGHADIANLKSGERHVVSLERWITNGIAGPVSSSMSGILALPLLVVIQICQYFQLLELHKLTHEQMLSSLRNGGGAQGYCGGLPTAFAISCAKDEEDVVRLATKALRLAFAVGAFGELGDDESIEGATTIAVRLRASQQGEELVEGIPGCYISAITDPRTISIVGPVTELTKVADRARDQGLLVTDIHIRGKVHNPENAPLVKVLFDLCQEHDEMTLPDASQLRVPVRSNLSGKLLNNCSLTHEAINTILASRCEWYRLLKEVAQDLAGSGTDSHTFALFGIGDPVPLMPFHNARLRVAKVEAHTAIQEARLAEYKYPEDAIAVTGVSCRLPRANDLEELWQLLAAGTSTCEEIRHDRVP…
Alternaria_cf._alternata_R_IC_06_P1_GCA_020284155.1	g7914	SAT-KS-AT-PT-xCP	MIRAKVLYFSGEIPQGDPEGDQQDLFRKLHLLSKERSHPILALFLETITRAVKEEQRQLIRTERDLIPAFESILDLTDHVIELRKTALGGAVERVLVLAFQLGSFIAYHEAHPLEYNFQSSDTFLIARGPGMLSAAAIALCPNVSMVPSIAGDIAKVAFRFGLVVDQVCRSLEISPDEINAAGAWIYCVYGVDPSEAQEAVALFNAEKEYAETSVASVFNDDGKSVSIGGPPSTLKTLFTECEFFKRTRNVPMKKVQGMWHTGKVYGMEHVQQVVPHIDEKHRLHLSLFSPVTGQPFEAANANELLEQIMEEMLTQRIRWDRTIQSVTERLKQVSPNSTQLIAIQPSQYVESLLAQWKADIPTATYTAKDMMSAIMNLPLGSSPAKDAKSSKIAVVGMA…
Alternaria_cf._alternata_R_IC_06_P1_GCA_020284155.1	g7645	SAT-KS-AT-PT-xCP-xCP-Te	MNVLIFGDQTADQYPLLRKACTWKNNSTLTTFLDRVSQVVREEVQKLPRTQRDQIPNFLTTWDLIEAYYAKGLKIPQLESCMVTIAQLAHFIGYYAENPSDLQNPANTRVVGLCTGLLAGSVVASARSLSELLPLATEAVRIAFRTGTVVGAAKEAVEQASAPKETWSTIVTNMTEKAAKDAIAAFHEEQQTPTLAQAYISAVSTMALTISGPPATTKRLLQGDAFKGCARVAIPVYAPYHAAHFYSPADIDQILDKDAIRHLQQFRPLSLVHSATTGKCHTATSTLDLIRSALTEILVEPVRWDNLLTEVVSQVTATSSQDCSVSAIGVTTITNSLVSALRNGGQSSVTARDHTTWVAAEHDSRGRTQNDKIAIVGMSGRFPGAANPDALWDLLEKGL…
Alternaria_conjuncta_BMP_0040_GCA_024043145.1	g7839	KS-AT-DH-ER-KR-xCP	MNTSANSEQPSMAPSSQPPGVEPIAIVGFGFKFPQDITDAQSLWKLLMERRSTMTEIPKNRWNIDGFYKEHGHRPGTVKNRGGHFLADDPARFDAPFFSIQPAEAECMDPQQRLLLETSYHALENAGIPMQAAIGTRTSVHVGCLLQEYSQISQRDAQMPGDYRIVGSSGLAMLANRLSWFYDFSGPSMTVDTACSGGLVALHLACQELLAGSVDMSLVGGNNLCLLPDSTALLSSLNMMSKDSVCYSFDERASGYARGEGFGVLILKRLDKAVADGDTIRGVIRSTGCGQDGNTPSITSPSQSAQERLIRETYARAGLDLGDTRYFEAHGTGTPVGDPCEAAAINNVFSSRTPEDPIFVGALKGNMGHPEGASGIAGVIKSLLVLEKGIIPPNVYPER…
Alternaria_conjuncta_BMP_0040_GCA_024043145.1	g6175	KS-AT-DH-KR-xCP	METPDSNQYSSSSFSPVQVHSSVTEAELGELGECNDVAVIGMACRVAGGNHSPEQLWESILAKRDASSEIPAMRWEPYRHRDVRNIKALDNTTSRGYYLDALEDFDPSFFGISPKEAEQMDPQQRISLEVAWEALESAGIDPKSLSGSDTAVFMGVNSDDYGKLLLEDLPNIEPWLGIGTAYCGIPNRISYHLNLMGPSTAVDAACASSLVAIHHGRQAILCGESRIAITGGVNAICGPGLTRVLDKAGAISPDGSCLSFDDNAHGYGRGEGAAVVMLKRFRDAIRDGDNVIALLKGSAVAQDGKTNGIMAPNAKAQELVARQALKQADIDPATVEYVEAHATSTPLGDPTEVSAISAVYGASRSAPVNVGSVKPNVGHLEAGAGAIGFIKAVLALNKA…
Alternaria_conjuncta_BMP_0040_GCA_024043145.1	g1614	KS-AT-DH-MT-ER-KR-xCP	MNKPIAIIGISFRGPGDARDPEAFYRMLVEGRSARTEIPKDRYNVDAFYHPDPERLGSIQQRHAHFLEQDFKVFDAPFFSITPKEAKAMDPTHRILLEATYEGFENAGLTLEQVSGTQTSCYIGTFTADFPNLQARDNEGPSIYHATGMSASLASNRLSWFYNLRGPSLTVDTACSSSLTAFHLACQSIRTGEAEMSVVGGANLMFGPDMSILLGAAKILSPEGKSKMWDADANGFARGEGFGVTILKPLDAAIRDGDNIRAVVLATAANEDGRTPGISLPNSEAQQELIRTAYRQAGVDPAETGYVEAHGTGTQAGDPLEARAILKTIGSVENRTSDLYVGSVKTNIGHLEGAAGVAGIIKAALTVERGMILPNLWFEKLNPDIDLPKNVKIASKLTP…
Alternaria_conjuncta_BMP_0040_GCA_024043145.1	g2403	KS-AT-DH-MT-ER-KR-xCP	MPLYYTDTTPTNGIPDMNGVPSDAPPQPKSDDLSNAIAIVGISCKFGGSASNLDGLWHTLSSGESCWSPVPKSRFDISKTSHPDSQRTDSLHVKGGFFIEDDLTEFDAPFFNLTAEVAKSMDPQLRLMLEGVYNATESAGLPIEKLSGSNTSVYSATFGRDYAEMLMKDADSMPTSLVTGNGPAMFANRVSHFYNLMGPSVTVDTGCSGGLVALHMGVNSIRNQESEVSIIGASNAILNQDFYIAISNLGLLHEDGKCYSMDHRFGGYGRGEGMAVLVLKKYSAAARDGDHIHALIRESAVNQDGRTGTITSPSMEAQQQLIKQCYNRAGIDLSSTGYVEAHGTGTGGDAIEAEALALTFGNSREKFDPIWVGSVKSNIGHTEPVSGLAAVIKAALILR…
Alternaria_conjuncta_BMP_0040_GCA_024043145.1	g2651	KS-AT-DH-MT-ER-KR-xCP	MEPIAIVGLSYKLPEGDNEDHSFWDNLERGRSLSRPWPKSRCNVDAFYSSNVYSTYAHFVKEDPAAFDAAFFSITSKEAASMDPQQRWLLETSYKALENAGIPPETLAGSQTAVFAASMSDDYSRILARDPDEAPTNTATGTSPSILANRLSWYFDFKGPSIQLNTACSTSIIAMDLACQSLRSGQSSMALLAGANVLLSVEISLYLSNMQMLSPDGVSYSFDHRANGYARGEGAVVLVLKRLSDAIRDSDVIRAVVRATGSNQDGRTPGITQPSAESQEQLIRQVYKSSNLGFESTRYVEAHGTGTQLGDATEMKAIGRTFRASRSQKHPLYVGSVKSNIGHLEGCSGLAGILKSIMILEMGVIPPSALFEKISPKINAKIYHVDVPMKCIPWPTNGL…
Alternaria_conjuncta_BMP_0040_GCA_024043145.1	g6653	KS-AT-DH-MT-ER-KR-xCP	MATTDKTTPIAIIGMNMKFPGDAVSASSFWELIMNARNVSKEIPTDRFNIDAFYHPDPNRLDSLRIRHAHFMEEDPRSFDAPFFNMSYAEASVLDPQQRGLLEGAYRTFENAGIPMETLSRSPTSVYCASFSRDGETITGRDFSAQFRYHATANGSSMLSNRISHFFDLAGPSLTVDTACSSGLYALHLGAQSILAGESKMSLVCGANTFITPESQALALSNGGFLSVDGKSYSFDAKANGYARGEGFGFVLLKPLDAALRDGDVVRAVIRATGANQDGRTPSITQPSQQAQLDLLRDTYRVAGLNVADTDYVEAHGTGTPVGDPIEAAAVGQAFRDGRKADRPLYMGSVKANIGHLEGASGMAGVIKAVLALENAVIPPIAMFEKPNPAIDVAGLQLA…
Alternaria_conjuncta_BMP_0040_GCA_024043145.1	g6688	KS-AT-DH-MT-ER-KR-xCP	MARSEDPEPMAIVGMGCRWAGGVRNPTDLWELLLNKRSGYHDWAAPRFSAEGFYHPNPERPGTTAAKGGYVVTEDPRLFDPSFFGISGLEAETIDPSQRKLLEVVYESLESAGETWESVNGTRTGVYVADISYDNSYAQTRDWEYARPHATTGVCHNILSNRINYVFNLRGPSVTLDSACTSAMYGLHMAIQAIRDGDCDSAIVATANYIMDPSMQIAMDKLGALSGTSMSHAFDAAADGYARGEGFAAIYVKKPQQAMQDGNPIRALVRGSAIGANGRSSGITHPSGTAQEDIIRKAYHNAGNLSPSETPFLECHGTGTRVGDPLEVEAAGKVFGPGRSSSEEDRLLIGSVKTNLGHTEGAAALASIFKVVLALEAGVIPPSIGVTTLNPRIDFDKAK…
Alternaria_conjuncta_BMP_0040_GCA_024043145.1	g7353	KS-AT-DH-MT-ER-KR-xCP	MAYEDTKPMPIAIVGFGCRFPGDVTNGEKLWQMLVEKKSARTEVPLDRFNVDAFYNPDGDRFGTCNNRGGHYLAEDVSLFDAPFFSISPAEAMAMDPMQRLLLEVTYEALENSGTPLARVSGSQTSCYVGCFTKDYEEMQRRDMELAPKYQSTGASQTMLSNRLSYFFNLKGPSVSIDTACSSGLVAVHLACQSLRTGESSMAIAGGSNLILSPDIQIEMSDMHFLSPDSISHAFDDRANGYARGEGVGAIILKPLDLAIRDNDPIRAIIRGTAASSDGRTPGITMPSKDAQVDLIRSAYRAAGIDVSETGYFEAHGTGTAAGDPIESGAIGEVFATSRPRRISATTEQVVPLSIGSVKTNMGHLEGASGIAGLIKAILSVEKGMIAPNLWFQRGNPAI…
Alternaria_conjuncta_BMP_0040_GCA_024043145.1	g376	KS-AT-DH-MT-KR-xCP-C-A-xCP-Red	MTAHRETSQGNGEPIAVIGSGMRFPGSSNNSSKLWELLLNPRDLLKRIPEDRFNIDNFYHPDPNHHATTDVRESYFLEEDHRHFDAGFFNIKPVEVAAIDPQQRLLMEVVYESLEAAGIPLESLIGSRTGVYVGLMCADYHDHLHKDVDTLPTYAPTGTARSIMSNRISYFFDWHGPCMTIDTACSSSLVAVHQAVQLLRSGDSDVAVAAGVNMILGSGQYIAESSLHMLSADSRSRMWDADASGYARGEGVASVILKRLSTALADGDKIECIIRESGVNQDGRTKGITMPSASAQMDLIEQTYKKAGLDPKDPNQRCQYFEAHGTGTAAGDPKEAEAISKAFFHPGDSTSHKGDPLYVGSIKTVIGHTEGTAGLAGLLKASLAVQHGVIPPNLLFNKL…
Alternaria_conjuncta_BMP_0040_GCA_024043145.1	g4225	SAT-KS-AT-DH-xCP-xCP-MT	MRSQSDHFAPSVAFFCPQSKAPTEAYLEQLQKYIVETPLLLPFAEAITSLTDTWTILCDGHPDIAKLKSGKRHVVSLKRWITDGISGPVSSSMSGILALPLLVVIQICQYFQLLELHGLTHERMLASLKKGGGAQGYCGGLPTAFAVSCAKDEEEVVHLATKALRLAFAVGTFGELGDDELVEGATTIAVRLRTPPQGDELVAGIPRCYISAITDPKTISIVGPVLELEKVAERARNRGLLVTDIHIRGKVHNPENAPLVKVLFDICQEHDDMMLPDASQLRVPVRSNLDGSLLHDCSLTHEAINTILASRCEWYRLLKGVAQDLAGSGTDAHTFALFGIGDPVPLMPFHNARLRISKMEVHTTVQGARLAEYKYPEDAIAITGVSCRLPRAADLEELW…
Alternaria_conjuncta_BMP_0040_GCA_024043145.1	g11081	SAT-KS-AT-PT-xCP-xCP-Te	MNVLIFGDQTADQYPLLRKACTWKNNSTLTSFLDRISQVVREEVQKLPRTQRDQIPNFLTTWDLIEAYYAKGLKVPQLESCMVTIAQLSHYIGYYAENPSDLKNPANTRVVGLCTGLLAGSVVASARSLSELLPLAIEAVRIAFRTGTVVGAAKEALEQTPVPKETWSTIVTSISEKAAKDAITAFHQEQRIPTLAQAYISAVSTMALTISGPPSTTKRLLQSDAFKGCTRVSIPVYAPYHAAHLYTEADIDQILDKDATRHLQQFRPLSLVHSASTGECHTATSTLDLIRTALSEILVESVRWDNLLSEVVSQVTATSSQDCSVSAIGVTSITNSLVSALKSGGQSSVTARDHTSWVAAEHDSRGRTQNDKIAIVGMSGRFPGAANPDALWDLLEKGL…
Alternaria_conjuncta_DAOMC195272_GCA_040584035.1	g6311	KS-AT-DH-ER-KR-xCP	MNTSANSEQPSMAPSSQPPGVEPIAIVGFGFKFPQDITDAQSLWKLLMERRSTMTEIPKNRWNIDGFYKEHGHRPGTVKNRGGHFLADDPARFDAPFFSIQPAEAECMDPQQRLLLETSYHALENAGIPMQAAIGTRTSVHVGCLLQEYSQISQRDAQMPGDYRIVGSSGLAMLANRLSWFYDFSGPSMTVDTACSGGLVALHLACQELLAGSVDMSLVGGNNLCLLPDSTALLSSLNMMSKDSVCYSFDERASGYARGEGFGVLILKRLDKAVADGDTIRGVIRSTGCGQDGNTPSITSPSQSAQERLIRETYARAGLDLGDTRYFEAHGTGTPVGDPCEAAAINNVFSSRTPEDPIFVGALKGNMGHPEGASGIAGVIKSLLVLEKGIIPPNVYPER…
Alternaria_conjuncta_DAOMC195272_GCA_040584035.1	g3337	KS-AT-DH-KR-xCP	METPDSNQYSSSSFSPVQVHSSVTEAELGELGECNDVAVIGMACRVAGGNHSPEQLWESILAKRDASSEIPAMRWEPYRHRDVRNIKALDNTTSRGYYLDALEDFDPSFFGISPKEAEQMDPQQRISLEVAWEALESAGIDPKSLSGSDTAVFMGVNSDDYGKLLLEDLPNIEPWLGIGTAYCGIPNRISYHLNLMGPSTAVDAACASSLVAIHHGRQAILCGESRIAITGGVNAICGPGLTRVLDKAGAISPDGSCLSFDDNAHGYGRGEGAAVVMLKRFRDAIRDGDNVIALLKGSAVAQDGKTNGIMAPNAKAQELVARQALKQADIDPATVEYVEAHATSTPLGDPTEVSAISAVYGASRSAPVNVGSVKPNVGHLEAGAGAIGFIKAVLALNKA…
Alternaria_conjuncta_DAOMC195272_GCA_040584035.1	g10067	KS-AT-DH-MT-ER-KR-xCP	MEPIAIVGLSYKLPEGDNEDHSFWDNLERGRSLSRPWPKSRCNVDAFYSSNVYSTYAHFVKEDPAAFDAAFFSITSKEAASMDPQQRWLLETSYKALENAGIPPETLAGSQTAVFAASMSDDYSRILARDPDEAPTNTATGTSPSILANRLSWYFDFKGPSIQLNTACSTSIIAMDLACQSLRSGQSSMALLAGANVLLSVEISLYLSNMQMLSPDGVSYSFDHRANGYARGEGAVVLVLKRLSDAIRDSDVIRAVVRATGSNQDGRTPGITQPSAESQEQLIRQVYKSSNLGFESTRYVEAHGTGTQLGDATEMKAIGRTFRASRSQKHPLYVGSVKSNIGHLEGCSGLAGILKSIMILEMGVIPPSALFEKISPKINAKIYHVDVPMKCIPWPTNGL…
Alternaria_conjuncta_DAOMC195272_GCA_040584035.1	g11280	KS-AT-DH-MT-ER-KR-xCP	MAYEDTKPMPIAIVGFGCRFPGDVTNGEKLWQMLVEKKSARTEVPLDRFNVDAFYNPDGDRFGTCNNRGGHYLAEDVSLFDAPFFSISPAEAMAMDPMQRLLLEVTYEALENSGTPLARVSGSQTSCYVGCFTKDYEEMQRRDMELAPKYQSTGASQTMLSNRLSYFFNLKGPSVSIDTACSSGLVAVHLACQSLRTGESSMAIAGGSNLILSPDIQIEMSDMHFLSPDSISHAFDDRANGYARGEGVGAIILKPLDLAIRDNDPIRAIIRGTAASSDGRTPGITMPSKDAQVDLIRSAYRAAGIDVSETGYFEAHGTGTAAGDPIESGAIGEVFATSRPRRISATTEQVVPLSIGSVKTNMGHLEGASGIAGLIKAILSVEKGMIAPNLWFQRGNPAI…
Alternaria_conjuncta_DAOMC195272_GCA_040584035.1	g2875	KS-AT-DH-MT-ER-KR-xCP	MATTDKTTPIAIIGMNMKFPGDAVSASSFWELIMNARNVSKEIPTDRFNIDAFYHPDPNRLDSLRIRHAHFMEEDPRSFDAPFFNMSYAEASVLDPQQRGLLEGAYRTFENAGIPMETLSRSPTSVYCASFSRDGETITGRDFSAQFRYHATANGSSMLSNRISHFFDLAGPSLTVDTACSSGLYALHLGAQSILAGESKMSLVCGANTFITPESQALALSNGGFLSVDGKSYSFDAKANGYARGEGFGFVLLKPLDAALRDGDVVRAVIRATGANQDGRTPSITQPSQQAQLDLLRDTYRVAGLNVADTDYVEAHGTGTPVGDPIEAAAVGQAFRDGRKADRPLYMGSVKANIGHLEGASGMAGVIKAVLALENAVIPPIAMFEKPNPAIDVAGLQLA…
Alternaria_conjuncta_DAOMC195272_GCA_040584035.1	g2910	KS-AT-DH-MT-ER-KR-xCP	MARSEDPEPMAIVGMGCRWAGGVRNPTDLWELLLNKRSGYHDWAAPRFSAEGFYHPNPERPGTTAAKGGYVVTEDPRLFDPSFFGISGLEAETIDPSQRKLLEVVYESLESAGETWESVNGTRTGVYVADISYDNSYAQTRDWEYARPHATTGVCHNILSNRINYVFNLRGPSVTLDSACTSAMYGLHMAIQAIRDGDCDSAIVATANYIMDPSMQIAMDKLGALSGTSMSHAFDAAADGYARGEGFAAIYVKKPQQAMQDGNPIRALVRGSAIGANGRSSGITHPSGTAQEDIIRKAYHNAGNLSPSETPFLECHGTGTRVGDPLEVEAAGKVFGPGRSSSEEDRLLIGSVKTNLGHTEGAAALASIFKVVLALEAGVIPPSIGVTTLNPRIDFDKAK…
Alternaria_conjuncta_DAOMC195272_GCA_040584035.1	g8477	KS-AT-DH-MT-ER-KR-xCP	MNKPIAIIGISFRGPGDARDPEAFYRMLVEGRSARTEIPKDRYNVDAFYHPDPERLGSIQQRHAHFLEQDFKVFDAPFFSITPKEAKAMDPTHRILLEATYEGFENAGLTLEQVSGTQTSCYIGTFTADFPNLQARDNEGPSIYHATGMSASLASNRLSWFYNLRGPSLTVDTACSSSLTAFHLACQSIRTGEAEMSVVGGANLMFGPDMSILLGAAKILSPEGKSKMWDADANGFARGEGFGVTILKPLDAAIRDGDNIRAVVLATAANEDGRTPGISLPNSEAQQELIRTAYRQAGVDPAETGYVEAHGTGTQAGDPLEARAILKTIGSVENRTSDLYVGSVKTNIGHLEGAAGVAGIIKAALTVERGMILPNLWFEKLNPDIDLPKNVKIASKLTP…
Alternaria_conjuncta_DAOMC195272_GCA_040584035.1	g8626	KS-AT-DH-MT-ER-KR-xCP	MPLYYTDTTPTNGIPDMNGVPSDAPPQPKSDDLSNAIAIVGISCKFGGSASNLDGLWHTLSSGESCWSPVPKSRFDISKTSHPDSQRTDSLHVKGGFFIEDDLTEFDAPFFNLTAEVAKSMDPQLRLMLEGVYNATESAGLPIEKLSGSNTSVYSATFGRDYAEMLMKDADSMPTSLVTGNGPAMFANRVSHFYNLMGPSVTVDTGCSGGLVALHMGVNSIRNQESEVSIIGASNAILNQDFYIAISNLGLLHEDGKCYSMDHRFGGYGRGEGMAVLVLKKYSAAARDGDHIHALIRESAVNQDGRTGTITSPSMEAQQQLIKQCYNRAGIDLSSTGYVEAHGTGTGGDAIEAEALALTFGNSREKFDPIWVGSVKSNIGHTEPVSGLAAVIKAALILR…
Alternaria_conjuncta_DAOMC195272_GCA_040584035.1	g7645	KS-AT-DH-MT-KR-xCP-C-A-xCP-Red	MTAHRETSQGNGEPIAVIGSGMRFPGSSNNSSKLWELLLNPRDLLKRIPEDRFNIDNFYHPDPNHHATTDVRESYFLEEDHRHFDAGFFNIKPVEVAAIDPQQRLLMEVVYESLEAAGIPLESLIGSRTGVYVGLMCADYHDHLHKDVDTLPTYAPTGTARSIMSNRISYFFDWHGPCMTIDTACSSSLVAVHQAVQLLRSGDSDVAVAAGVNMILGSGQYIAESSLHMLSADSRSRMWDADASGYARGEGVASVILKRLSTALADGDKIECIIRESGVNQDGRTKGITMPSASAQMDLIEQTYKKAGLDPKDPNQRCQYFEAHGTGTAAGDPKEAEAISKAFFHPGDSTSHKGDPLYVGSIKTVIGHTEGTAGLAGLLKASLAVQHGVIPPNLLFNKL…
Alternaria_conjuncta_DAOMC195272_GCA_040584035.1	g2393	SAT-KS-AT-DH-xCP-xCP-MT	MRSQSDHFAPSVAFFCPQSKAPTEAYLEQLQKYIVETPLLLPFAEAITSLTDTWTILCDGHPDIAKLKSGKRHVVSLKRWITDGISGPVSSSMSGILALPLLVVIQICQYFQLLELHGLTHERMLASLKKGGGAQGYCGGLPTAFAVSCAKDEEEVVHLATKALRLAFAVGTFGELGDDELVEGATTIAVRLRTPPQGDELVAGIPRCYISAITDPKTISIVGPVLELEKVAERARNRGLLVTDIHIRGKVHNPENAPLVKVLFDICQEHDDMMLPDASQLRVPVRSNLDGSLLHDCSLTHEAINTILASRCEWYRLLKGVAQDLAGSGTDAHTFALFGIGDPVPLMPFHNARLRISKMEVHTTVQGARLAEYKYPEDAIAITGVSCRLPRAADLEELW…
Alternaria_conjuncta_DAOMC195272_GCA_040584035.1	g720	SAT-KS-AT-PT-xCP-xCP-Te	MNVLIFGDQTADQYPLLRKACTWKNNSTLTSFLDRISQVVREEVQKLPRTQRDQIPNFLTTWDLIEAYYAKGLKVPQLESCMVTIAQLSHYIGYYAENPSDLKNPANTRVVGLCTGLLAGSVVASARSLSELLPLAIEAVRIAFRTGTVVGAAKEALEQTPVPKETWSTIVTSISEKAAKDAITAFHQEQRIPTLAQAYISAVSTMALTISGPPSTTKRLLQSDAFKGCTRVSIPVYAPYHAAHLYTEADIDQILDKDATRHLQQFRPLSLVHSASTGECHTATSTLDLIRTALSEILVESVRWDNLLSEVVSQVTATSSQDCSVSAIGVTSITNSLVSALKSGGQSSVTARDHTSWVAAEHDSRGRTQNDKIAIVGMSGRFPGAANPDALWDLLEKGL…
Alternaria_consortialis_JCM_1940_GCA_001950455.1	g4702	KS-AT-DH-ER-KR-xCP	MAIVGFACRLPGGNNSPQKLWEFLESGGVAPNKVPKSRFNIDGHYDGSHKPGTMRPPGGMFLSDDIDLAHFDASFFETSGSDAIGIDPNQRQLLEVVYEGLESAGLTLEKLDGAPVACFVGSYSSDYHAMLNRDGEDAPPNFVAGTARAMLANRVSYFLNIKGPSVTVDTACSGSLVGLDLACRSLQMGEANLAIVAASNLFLNPEHVMDTGGMGQAHSPTALCHTFDADADGYVKAEAVNCLIVKRLADAIRDRDPIRAVVRGTASNSNGRTVGGIVSPNSVAQATAIRTAYARAGISDFNETAYLECHGTGTPAGDAAEVNGAGSVFGRTRDTARPLLIGSIKSNLGHAEPAAGISGVIKVILSMEKNQIPGTPTFIKPSPKIDFSGNRVKASRRVV…
Alternaria_consortialis_JCM_1940_GCA_001950455.1	g7016	KS-AT-DH-ER-KR-xCP	MDDSVDSREPSMAPSNRPNSVEPIAIVGFGFKFPQDITSAESLWKLLIERRSTMTEIPKNRWNIDGFYKEHGHRPGTVKNRGGHFLADDPARFDAPFFSIQPAEAECMDPQQRLLLETSYHALENAGIPMQAAMGTRTSVHVGCLLQEYSQISQRDAQMPGDYRIVGSSGLAMLANRLSWFYDFSGPSMTVDTACSGGLVAFHLACQELLAGSVDMSLVCGNNLCLLPDSTALLSSLNMMSKDSVCYSFDERASGYARGEGFGVLILKRLDKAIADGDTIRGVVRSTGCGQDGNTASITAPSQSAQERLIRETYARAGLDLDNTRYFEAHGTGTPVGDPCEAAAINNVFSSRTPEDPIFVGALKSNMGHPEGASGIAGVIKTLLVLEKGIIPPNVYPER…
Alternaria_consortialis_JCM_1940_GCA_001950455.1	g2690	KS-AT-DH-MT-ER-KR-xCP	MASNMTSEPIAIIGMSCRFPGGASEPARLWDVLSSGKSAWSDVPKDRFNMKAFYLKGDPHPSTTNTPGGHFLDSDVATFDCSFFEIKPTEARAMDPQQRLTLELAYEAFENAGLTISQLWGSSTGVYVGQWSSDYSEIMARDPEHQELYHTLGTGAAITSNRVSFFFNLRGPSFTVDTGCSASLVALHNAVQSLRSGESTMSLVGGVNILLDPQRFTYQSKLKMFSPDGRSFSFDERANGYGRGEGCGCVVLKPLSLAIKDGDEIRAVIRNSALNQDGRTPQGISVPSGEAQEELIRRAYAEVGLVPAETDYVEAHGTGTAVGDPIEAQAIANVLARPRDSTQGPLIMGSVKGNIGHTESAAGIAGLIKSVLMLENQALPPQVNYEKPNPKIPLDIWNL…
Alternaria_consortialis_JCM_1940_GCA_001950455.1	g5352	KS-AT-DH-MT-ER-KR-xCP	MACEDTKPMPIAIVGFGCRFPGDVTNGEKLWEMLVEKKSARTEVPPDRFNINAFHNPDGDRFGTCNNRGGHYLTEDVSLFDAPFFSISPAEAMAMDPMQRLLLEVTYEALENSGTPLARVSGSKTSCYVGCFTKDYEEMQRRDMELAPKYQSTGASQTMLSNRLSYFFNLKGPSVSVDTACSSGLIAVHLACQSLRMGESSMAIAGGSNLILSPDIQIEMSDMHFLSPDSISHAFDDRANGYARGEGVGAIILKPLDLALRDNDPVRAIIRGTAASSDGRTPGITMPSKDAQVDLIRSAYRAAEIDVSETGYFEAHGTGTAAGDPIESGAIGEVFAANRPRRIMETTEEVVPLSIGSVKTNMGHLEGASGIAGIIKAMLSVEKGIIAPNLWFERGNPAI…
Alternaria_consortialis_JCM_1940_GCA_001950455.1	g5670	KS-AT-DH-MT-ER-KR-xCP	MATDKTTPIAIIGMNMKFPGDAVSAQAFWELVMSARNVSKEIPSDRFNIDAFYHPDPNRLDSLRIRHAHFMEEDPRSFDAPFFNMSYAEASVLDPQQRGLLEGAYRTFENAGIPMETLSRSPTSVYCASFSRDGETITGRDFAAQSRYHATANGSSMLSNRISHFFDLAGPSLTVDTACSSGLYALHLGVQSILAGESAMSLVCGANTFITPESQALALSNGGFLSIDGKSYSFDAKANGYARGEGFGFVLLKPLDAAVRDGDVVRAVIRATGANQDGRTPSITQPSQQAQLDLLRDTYRVAGLDVADTDYVEAHGTGTPVGDPIEAAAIGEAFRDGRKSYRPLYVGSVKSNIGHLEGASGMAGVIKAVLALEKAMIPPIAMFEQANPAIDVEGLQLAF…
Alternaria_consortialis_JCM_1940_GCA_001950455.1	g8755	SAT-KS-AT-PT-xCP-Te	MKTSHRTVLLFGDVTDPWVEGIDHVYVQAAKKPWIRSFLEDLFSAIKTETKVMDRVLQEGFKDSSSFQELAERYRHAGDDFGMAHAMMIYAIRAVVLLETLSREPHILDESRPRPEVIGISGGLFSAAVISISINFETLYAACIEAGRVWSRLCNLTLVRSRAMEESPGTWGWAILGIPAADLGKTLDQFQSSMGIHSSKRAKIGVIGDRWSTIIGPPSVLELTLSECPNLKNLPKNELNIHALQHTLSVSDSDIDYIVGNSPLLETPLPSGYRIHGLDDDFPEASYAEWRHLLRASAYQTLSRPLDIVQAVSNLNAALGASKDIEAKIIGPSSHTTYLVKCLQTAGKEVFVQNGFLASPQTSGTNDGIAIVGMAGKGPGSDDLEEFWNVILKGLDLHE…
Alternaria_consortialis_JCM_1940_GCA_001950455.1	g914	SAT-KS-AT-PT-xCP-xCP-Te	MNVLIFGDQTADQYPLLRKACTWKNNSTLTTFLDRVSQVVREEVQKLPRTQRDQIPNFLTTWDLIEAYYAKGLKVPQLESCMVTIAQLAHYIGYYAENPSDLQNAANTRVVGLCTGLLAGSVVASARSLSELLPLATEAVRIAFRTGTVVGAAKEALEQASATKETWSIIVTNMAEKAAKDAIAAFHEEQRTPVLAQAYISAVSTMALTISGPPATTKRLLQGDAFKGCARVAIPVYAPYHAAHLYAEADIDQILDKDAIRHLQQFRPLSLVHSASTGKCHTATSTLDLIRTAITEILVEPVRWDNLLTEVVSQVTATSSQDCSVSAIGVTTITNSLVSALRNGGQSSITARDHTTWVAAEHDSRGRTQNDKIAIVGMSGRFPGAANPDALWDLLEKGL…
Alternaria_dauci_na_GCA_025504955.1	g4167	KS-AT-DH-ER-KR-xCP	MDAFIDSEEFPMSSSSPNRVEPIAIVGFGFKFPQDITNAESFWKLLIERRSTMTEIPKNRWNIDGFYKEHGHRPGTVKNRGGHFLADDPARFDAPFFSIQPAEAECMDPQQRLLLETSYHALENAGIPMQAAMGTRTSVHVGCLLQEYSQISQRDAQMPGDYRIVGSSGLAMLANRLSWFYDFSGPSMTVDTACSGGLVAFHLACQELSAGSVDMSLVCGNNLCLLPDSTALLSSLNMMSKDSVCYSFDERASGYARGEGFGVLILKRLSTAIADGDTIRGVVRSTGCGQDGNTPSITSPSQSAQERLIRETYARAGLDLGHTRYFEAHGTGTPVGDPCEAAAISNVFSCRTPEDPIFVGALKSNMGHPEGASGIAGVIKTLLVLEKGIIPPNVYPERI…
Alternaria_dauci_na_GCA_025504955.1	g7539	KS-AT-DH-ER-KR-xCP	MPGSLPFPILTFSSDTHINCVSDPEMNSVETNNSHSAIAIVGLSCRFPGDAASPAGFWDLLKNGMSGFAESTSRYNAEAFQHPQTQGTRQNVIPVKGGYFLKQDLYEFDAAFFNITATEAMAMDPRQRIAMEVTYEALENAAMPLHKVRGSQTACFLGVSMSDYRDAVSRDFGNFPKYQILGISDEMIANRVSHFLDIHGPSATVQSACSSSLVATHIACQSLRSGESSMAIAGGVGLITLTDGTMHLTNLGFLNPKGHSMSFDADANGYGRGEGCGVIILKRLDDAIRDGDNIRAVIRGTGVNSDGWTQGVTMPSLEAQAALIKQVYETNGLDYNSTQYVEAHGTGTKVGDPIETRAIFQTIGQNNTALRKKLFMGSVKPNIGHLEAAAGVASIVKGV…
Alternaria_dauci_na_GCA_025504955.1	g11675	KS-AT-DH-KR-xCP	MSSHEMLDPCFKGFQCDDHHTNEVQLDPTSPSDIAIVGLSCRTAGGIDNLDTLWDFLLQKKHASGEIPPNRWEPWRRRSAHDAQAVGSITRKGYFLDDVEGFDAAFFGISPKEAEHMDPHQRLGLELAYEALQNAGIQTDRLAGSDTAVYIGVDSDDYARTVMDDLPAIEAWSGIGTAHHGVSNRISYHFDLRGPSAAVDAACASSLVALHLARQAIMSGESTVAICGGVNVICAPGITHMLQKAGALTTEGVCRSFDAAASGYARGEGGAIIVLKRLSAAQEDNDNILAVLKSSASAQDGKTKGIMAPNGAAQADVARQALRRAGDIDPHTVSYVEAHATSTPLGDPTEIKAMAEVYGVGRSRKSPCYLGSIKPNVGHLEAAAGAISVVKTVLSVQKG…
Alternaria_dauci_na_GCA_025504955.1	g2476	KS-AT-DH-MT-ER-KR-xCP	MDKPVAIIGIAFRGPGDARDPEAFYRLLVEGRNARTEIPKDRYNVDAFYHPDSERLGSIQQRHAHFLQQDFKVFDAPFFSITPKEAKAMDPTHRILLEATYEGFENAGLSLEKVSGTQTSCYIGTFTADFPNLQARDNEGPSIYHATGMSASLASNRLSWFYNLRGPSLTVDTACSSSLTAFHLACQSIRTGEAEMSVVGGANLMFGPDMSILLGAAKILSPEGKSKMWDANANGFARGEGFGVTILKPLDAALRDGDNIRAVVLATAANEDGHTPGISLPNSEAQQELIGRAYKMAGVDPAETAYVEAHGTGTQAGDPLEARAILKTIGSVEGRKSDLYVGSVKTNIGHLEGAAGVAGIIKAALTVERGMIPPNLWFEKLNPEIDLPENVKIASKLTP…
Alternaria_dauci_na_GCA_025504955.1	g7715	KS-AT-DH-MT-ER-KR-xCP	METYETSKKLNHEYIYVEHDSSGSLDGVSTPTEKSSQAFVPIAVVGMGMRLPGNCHDSEAFWDLLINQREGVIDVPSSRWNNEGFYDPHGRPGTVKTNQGNFLGSIDLADFDGSFFSMSAAQIAKVDPQHRVLLETTYEALENAGEINFRGKKVGVYVGMFADDFVEMQAKDSEPHEFLSLTGHLDLFGSNRISHEFDWSGPSMTIKTGCSAALVCLDQAFKALNAGDCDAAIVGGANLILSPALSGALGGQGVNSGDGRCRSFDAKATGYGRGEAVSSLLVKRLDDALKDGNPIRAIVRSTACNDDGKTPGITQPNTDAHEALIRAAYRTAGIPEEEFHKTGFFECHGTGTAVGDPIEVGAVARVFGKDGMVIGSVKSNIGHSEGASGNTSVIKAILA…
Alternaria_dauci_na_GCA_025504955.1	g8455	KS-AT-DH-MT-ER-KR-xCP	MATDKTTPIAIIGMNMKFPGDAVSAQAFWELLMSARNVSKEIPSDRFNVDAFYHPDPNRLDSLRIRHAHFMEEDPRSFDAPFFNMSYAEASVLDPQQRGLLEGAYRTFENAGIPMETLSRSPTSVYCASFSRDGETITGRDFAAQSRYHATANGSSMLSNRVSHFFDLAGPSLTVDTACSSGLYALHLGAQSILAGESAMSLVCGANTFITPESQALALSNGGFLSVDGKSYSFDEKANGYARGEGFGFVLLKPLDAAVRDNNIIRAVIRATGANQDGRTPSITQPSQQAQLDLLRDTYRVAGLNVADTTYVEAHGTGTPVGDPIEAAAIGEAFRKGRKSDSPLYVGSVKSNIGHLEGASGMAGVIKAVLALEKAVIPPIAMFEKTNPAIDTQALQLVF…
Alternaria_dauci_na_GCA_025504955.1	g5807	KS-AT-DH-MT-KR-xCP	MAAVKEPIAIIGSACRFPGGASSPSKLWDLLKEPRDVLTDIPKERLVLSNFYNKDGSFHGSTNVKNKSYLLSEDIRAFDAPFFQINALEAESMDPAQRILLETVYEAMEAAGSVDDVRSSQTSVFVGLMTADWWDLQMRDTEILPTYAATGTARSIVANRISYFFDLKGASMTIDTACSSSLVALHQAVQNLRNSESKTAIVAGANLILDPAVYISESKLHMLSPDSRSRMWDKTADGYARGEGCAAVLLKRLSDAIADGDHIESVIRETGVNSDGRTKGITMPSASAQAELIRSTYHNAGLDPTVDRCQFFECHGTGTPAGDPIEAQAISETFFPAEKKHEGSSKMYVGSIKTIIGHLEGCSGLAGVLKASLAIQNRTVPANLLFNELNPAIEPYYSN…
Alternaria_dauci_na_GCA_025504955.1	g1980	KS-AT-DH-MT-KR-xCP-Red	MGSYPEPNVGLLREPIAIVGSSCRFPGGANSPTKLWELLQNPRDIVREIPPSRFDPKTFYNQNSQHHGSMNTKYAYLLQEEPRLFDRDFFNISPKEAEAMDPQQRCLLETVYESVESAGYSIPQLQGSSTGVFVGATCFDYQSIAIRGLDSLPQYYATGGSMAILANRLSYFFDWRGPSIACDTACSSSLVALHQAVLSLRSGETNMAVAAGANLILGPELFIAYSNLNMLSPNGRSYMWDSSADGYVRGEGFASVILKTLSQAIADGDHIECIIRETGVNSDGRTPGITMPSAESQAQLIRDTYTRCGLDPVRDRPHYFEAHGTGTPAGDPIEARAIHDTFFPKHAYGQKDGKLYVGSIKTVIGHTEGTAGLAGVLKASLAVQHGQIPGNLHFKELNS…
Alternaria_dauci_na_GCA_025504955.1	g1668	KS-AT-DH-xCP-xCP-MT	MTQVARLLSPDHLGSLEYPGRLAALLHLSGQDWMLIQAEARNGKAFNWNEVADLLPGRTNKDCRKRWSKVQAGINKGAWTRVEDERLQKAVEKQGAKWALVSKSVRTRNADQCAKRWQHVLGPGCKHGPWTLEEDQKLLAAIEKHGNNWKQIGLSELHGRSSHDIRNRSVALTRRGKFQDRVQSTRSSSNDAEETMRQERMSNIQDENELGLDDEYGEHSFSGMNVDSEVETPHPSLGERADRELSFGSNTREDPHAINIVETGELSTMNPMWRWPDFTTGPLVFDEHQLSTTPDTGHSSNYNSISDASISTPSYLHSAFTNSAVLSLHEISPSTPNNRTTHTAQAFRNHHGTFNDIGDPLSLALDSSQHALSPTTTPEKKGHVTISLKQVDAGVAQDI…
Alternaria_dauci_na_GCA_025504955.1	g4776	SAT-KS-AT-DH-xCP-MT	MRSQSSHFRPSVAFFCPQSKAPTEAYLEQLQKYIVGTPLLQPFAEAITSLKDTWGTLCEGHADIAKLQSGERHVASLERWITDGVAGPVSSSMSGILALPLLVVIQICQYFQLLELHDLTHEQMLASLRNGGGAQGYCGGLPTAFAVSCAKDEEDVVRLATNALRLAFAVGAFGELGDDESIEGATTIAVRLRASQQGEELVEGIPGCYISAITDPRTISIVGPVLELKKVADRARSQGLLVTDIHIRGKVHNPENAPLVKVLFNLCQEHDEMTLPDASQLRVPVRSNLTGKLLDNCSLTHEAINTILASRCEWYRLLKEVAEDLAGSGTEAHTFALFGIGDPVPLMPFHNARLRVSKVEAHTAIQEARLAEYRYPDDAIAVTGVACRLPRANDLEELW…
Alternaria_dauci_na_GCA_025504955.1	g10603	SAT-KS-AT-PT-xCP	MSNMTRAKVLYFSGEIPQGDPEGDQRDLFRKLHLLNKERNYPILALFLETITEALKKERHRLTRAQRDLIPTFESILDLTDHVVELRKTSLGGAVERVLVLAFQLGSFIAYHEAHPLEYNFQPSDTFLIARGPGMLSAAAVALCPSVSMIPSIAGDIARVAFRFGVVVDQVCRSLEISPDEINAAGAWIYCVYGVDPSEAQEAVVRFNVEKAYAETSVASVFNDDGKSVSIGGPPSTLKTLFAECEFFKHTRNVPMKKVQGMWHTGKVYGVEHVQQIVPDIDGKHRLHLPLFSPVTGQPLEAANAKNLLEQIMEEMLTQRIRWDRTIQNVTERLKQVSPDCTQLLAIQPSQYVESLLAQWKADIPTATHTTEDMMSAIMNLPLGSSPAKDAKSSKIAVV…
Alternaria_dauci_na_GCA_025504955.1	g2002	SAT-KS-AT-PT-xCP	LFGLGTGLLSAAAASVSLNIADLAVAGAHIVRASFRLGIHVYNVSEQLEAPDADGNPWAFVIPGLTAEVVQAELDRYNRDTANLTLSHIFISASDKASVSVSGPPSRLRHCLKSCDVLRYSNFMPLPVHHGLCHAPHIYSAVDVQAIIEDILDDDHTRIAGLKTSLPLLSSSTGRPYPAKDFRSLIDQVLAELLMNKIHIDNVADGVIEVLDLPSASQQERNLFAFRNSVVLRTMMKNVEKQCDGRITFTHGDLVEWTKREESDAETPISPKRAKLAVVGMSCRLPGGANDHELFWKLMVDKRDVHTTIPPDRFDLSTHFDPTGQIENTTQTPYMNHIDSPGLFDAGFFNISPKEAEQIDPMHRLALVTAYEALEMSGYSPNRTRSTSSPRVGTYYGQA…
Alternaria_dauci_na_GCA_025504955.1	g7540	SAT-KS-AT-PT-xCP	MTQPKVQRTIFLLGDATDSWVDGLDQVYTQAASTPWMKEFLQRMTSVVIAEARSAALDRPLQDGLGYFSSLRELGDRYRHMPDQLGVVQAILLHTVRATTILQWVKQEPELIGPNASTEWVGLSGGLLSVSALAIAHDFESLYDASLEVARLVLRVAKLASVKSRAMEEEPGTWGWAVIGVSPEALREALEQFQRTNAIIPRKAKVGVIGDGWSTVIGPPSLLKAFLAQSATVRDAAKNPLTIQAGQHALNTTTADLEYMVGHNSSFLDRRIACPKHRLWGMDKPSAQYANWREMVSEICTQVLSRPLDIRHVFGQVESALDNVNEVRVLQPGASSHAAYLAKVLGRPGRSVLTEDQKTLVAADDDTWLKPGRIAIVGMAGRGPGSDNVDEFWKLIMDK…
Alternaria_dauci_na_GCA_025504955.1	g10888	SAT-KS-AT-PT-xCP-xCP-Te	MNVLIFGDQTADQYPLLRKACTWKNNSTLTTFLDRVSQVVREEVQKLPRTQRDQIPNFLTTWDLVEAYYAKGLKIPQLESCMVTIAQLAHYIGYYAENPSDLQNPANTRVVGLCTGLLAGSVVASARSLSELLPLATEAVRIAFRTGTVVGAAKDAVEQASAPKETWSTIVTNMSEKAAKDAIAAFHQEQRTPTLAQAYISAVSTMALTISGPPATTKRLLEGDAFKGCARVAIPVYAPYHAAHFYGQADIDQILDKDAIRHLQQFRPLSLVHSASSGKCHTATSTLDLVRAALTEMLVEPVRWDNLLTEVVSQITATSSQDCSVSAIGVTTITNSLVSALRNGGQSSVTARDHTTWVTAEHDSRGRTQNDKIAIVGMSGRFPGAATPDALWDLLEKGL…
Alternaria_dauci_na_GCA_025504955.1	g9499	Te-KS-AT-DH-MT-KR-xCP-C-A-xCP	MDQNPEVIQAHAGDHYTTPVFLIHDGGGTTFAYHCLDPLDRPVYGIFNPYFHTGEGFEGGICGMARLYAGIIRLAAVNPDFPAERDSGGRANILIGGWSLGGLLALEIAKILTGDRGVRIIGALMMDSIYPVNPPSMVRLGALDDMAAGEKSKNELLTLQAMKEALRVIQKWTPPVWAGTEVRPRFSLLRALDAMPATGIDGVHPADIHRSDPTLGWNAYDTSLFTDVEGIMQRLVFLRNMTDNFDQDRCCRSPIPSTLLFSTTLPVLYNMYEPVAIVGTACRFPGAASSTSKLWDLLKAPRDVLKEFPPERLNTANFYNENGDMHGRMNVEHKSYLLEEDVRHFDAAFFRINPKEAADMDPQQRLLLETVYEAFESAGWSLDDVSGSDTSVHVGTMTD…
Alternaria_destruens_LH_A593_GCA_037044395.1	g9528	A-xCP-KS-AT-xCP	MVPENEFNLTDDPSKLGHNVVSLFEQIQSRYSPKPAIVCGDHTITYGVLASESDRLACLLLSRGISRGHVVALALDRTPDLIIFILGVLKAGAAYVPIDPALPSERVNQMLDDEALRLVIVSHASTKGMTSNCRCDYGHKAACCTTSELRDQMRYQADKKPAVDIQGDDLAYILYTSGSTGKPKGVEVHHAAICNYALSVHQRPGCTDQDRVLFRSTISFDMSAIEIYVPLLCGATVVQAQTYEIRDPRALIHLINHHAVTFAVTTPTILQMLLDSGWCGTPGLSKLLTGGEALSPRLAERLTACVEEVWNIYGPTETTMSVATWKVQVGEDILIGTPKANIRLYVLDADMRPVPVGGTGELYISGAGVARGYRNNPERTKAAFLPDPFWEGHTMYKSG…
Alternaria_destruens_LH_A593_GCA_037044395.1	g6248	KR-KS-AT-DH-xCP-xCP-MT-Te	MANDELIHKLTWSPTALSKEPLSIAHVVFVVAEKESESLSAYQAQLANEGITTVVTDDAMKINPLITPKTIVVYIPPTAKSKEEIYAAATQACTSLINVAQQLYHRSISAKSKTVKLFSIVPKDWGIGDLVYAPLHGLSRVLKTEIPEIMAALKYAQGFDVVRICEGEAQVAYLQPFTDELSDKKELQLHANSSYLITGGTGGIGLATAAWLAQRGARNIVLVSRRGLPPSSDSKAVEANSADLISRIAKLKAVGVSVHVLAVDISKPNADVTLSQTINDLDIPPIKGVIHAAGTAGYHTLTRCTPTDIADNLAPKVIGSLNLDALFPPGTLDFFVFTSSVGQLVGFPGQLAYAPSNAFLDALAAHRRRQGDNSMAILWAGWQGTGVWDQSKSAMRRLN…
Alternaria_destruens_LH_A593_GCA_037044395.1	g1353	KS-AT-DH-ER-KR-xCP	MSPACDTVDMDGSPPPTETQALEPIAIIGYSCRLPGQVSSPSDLWELCTRGRSGWTPIPKDRWSVEAFHHPNASKPGTSNQAGGYFLGDISRFDAPFFNVSAQEAISMDPQQRFLLECTYEAMESAGISREYMAGRSIGVFIGANWPDYETNNIRDTETAPMFQATGGYPALQSNRISYMFDLKGPSLTVDTACSSSLVALHSAVQSLRSGECTEALVGGCHLLLTPENSITMSMQQLLNDEGKSFAFEERGNSGFARGEGAGIIMLKSLSAALRNRDPIRALIAHSGVNQDGKTRGITCPNGVAQEELIRRVYKEANLNPADCGFVEAHGTGTAVGDPIEATAIQAVFGKGRNARNPLYIGSVKTNVGHLEGASGIISVIKSAMMLERELILPNAGYK…
Alternaria_destruens_LH_A593_GCA_037044395.1	g2698	KS-AT-DH-ER-KR-xCP	METPKSNECEPIAIVGMGCRLPGGVHDIPAFWEFLRDQKDVQGEFAAPRFSAQGFYHPNLDRPGTAVGSSGFLLKEDPRLFDPSFFGIIDAEAETMDASQRKLLEVTYEAFENAGETWDSVSGGRIGVFVGDISLDNYVSQTRDWDYSGKYSASGAFPNMLANRIHYIFNLQGPSLLINSACASSIYALHLAITAIRNGDCDSAIVAGSNWLMDPNSHMAMGKLGALSPSSRCHTFDESADGYARGEGYAALYLKTASLAMQDASPIRALIRGCAVNANGRTKGITNPSGRAQEALIREAYKNAGGLDPGETTFLECHGTGTRVGDPIEVAAAGNVFGPSRSNDPEDRLPIGSVKTNVGHLEGASVLPSILKVVASLEAGKIPATLGFQTPNPRIDFDQ…
Alternaria_destruens_LH_A593_GCA_037044395.1	g3087	KS-AT-DH-ER-KR-xCP	MTNTDSSLTPIAVVGMSCRLPGEVRTLDDFWTLISRGRDAWGPIPSDRMSSASYYHPDPQRKGCFNPKGGYFLQEDFSQFDAPFFHITQQEAIAMDPQQRLLLECAYEALENAGFPQQTMAGSRMGVFTSLCSSDYRRGAFRDLDSVPIFDATGNQESIQAGRLSHFFNLRGPCMAIDTACSSSLYALHLAVQSIRSGDADSALVGGARLRLQPDEMVSMSMMGLYNEQGKTFAFDDRAVSGFACGEGVGCLVLKPLDQALKDNDPIYSVIRNTGANHDGQTVGLTNPNGEAQEQLMREVYARANISPTETGFVEAHGTGTKVGDPIEVGAINRVFGDGRTKRTPLYLGSVKSNFGHLEYASGIVSVMKASLMLHRGFILPNANFKRANPAIPLDQWNI…
Alternaria_destruens_LH_A593_GCA_037044395.1	g3316	KS-AT-DH-ER-KR-xCP	MEHSTSTTPCEPIAIIGIGCRLPGQASSPSKLWDLLINNATGYGPVPPSRYNAAGYYHPDADRPGSINSTGGYSIQEDIHAFENVFFGINNLEATSMDPQQRKLLEVTYEALENAGIPQEKMHGSNTGVYVGNFTNDFLNMQYKDPEYSSRYTATGTGLAVLANRITHCFDLRGPSHVIDTACSSSLYALHSACLALDAGDCDAAVVAAANLIQSPEEQMVAVKAGVLSPDAMCHTFDEKANGYARAEGVSAVYLKRLGDALRDGDPVRSVIRGTAVNGNGRTPGISQPSVEGQRAVIRAAYRRAGLDPGETDYVEAHGTGTKVGDPTEVEAISGVFQHRTGRPTLVGGVKPNLGHSEGASGLSGLIKIILALENKIIPATVGVKVINPRIKCREWNVD…
Alternaria_destruens_LH_A593_GCA_037044395.1	g5029	KS-AT-DH-ER-KR-xCP	MPGTQDSPVMPIAIVGIGGRFPGDASNPDRLWELLLNAKSTLSETPEDRFSADAFYHPQPDRPGTSNSCGGHFMNQNIEEFDAPFFSITPSEARAMDPQQRMCLEVAYEAMENAGITMDRISGSRTSCYVGCFNHDYQLLQNLDLDSLPFYHATGTESSCLSNRVSWFFNLAGPSMTVDTACSSSLIALHLACQSIRLGESETALVGGVNIISFPEIYMKLSNLQMVSPDSKSQTFDEKANGYGRGEGTCFVVLKPLDKAIEDNDVIRAVIRNTGSNEDGNTPGLTLPSKNMQKALIEKVYEEAGLQMRDTGYFEAHGTGTVAGDSIETQALGETIGKLRPPGQPLWVGSLKANIGHLEGGSGLASLIKTVYVLEKGVIPPQIWLDKLNPRIRAEEWNL…
Alternaria_destruens_LH_A593_GCA_037044395.1	g5448	KS-AT-DH-ER-KR-xCP	MAPSSSSIPSSVPSSPSVFTANGTGPHRDTARGQHEPIAIVGMGCRLPGDVNSPSRLWDFLKEGKSGQCKIPSSRFNVDAFYHPKGVDRPGSMHTTGGYFLQEDPRAFDPDFFGISPIEATYMDPQQRKLLEVVFEAFESAGASLDEVSGSNVGCYVGNFTVDFQVMQTRDPEYLHRYSATGMGTTILANRISHTFNLKGPSFVLDTACSSSLYCLHVACAALENGECDSAVVAGANLIQSPEQHLGTMKAGVLSGTSTCHTFSDEADGYGRAEGIGCIYLKRLSDAIKDNDPIRAIIRGTAVNSNGRTSGITLPSAEGQEAVIRKAYEKAALDFSQTMYVECHGTGTPVGDPIEAEGLSKIFHSRTGQPLLIGSVKSNLGHSEAASGISGIIKTVLAL…
Alternaria_destruens_LH_A593_GCA_037044395.1	g7666	KS-AT-DH-ER-KR-xCP	MNNTSSCPEPIAVIGLGCRFSGQAASLDGFWEMLRDGRKEHGPVPGNRYQAAAWKHPSHERKGAINHDSGFFLEEDPACFDAPFFSITAKEAAGMDPAQRLLLEVAYEAFENAGVPMESLPGSSTGVYSGCMTNDYELLSTRDIMDMPHNSATGNGRTMLANRISWFFDLRGPSIMMDTACSSSLTALHLATQALRAGECRMALVCGASIILHPNFTQRLSYMHMLSADGISHSFDSRANGYGRGEGLGAVLLKPLSQAIADGDVIRAIVRATGANQDGRTPGITMPNAEAQADLIRATYRQVGLSMRETAYFEAHGTGTALGDPTELSAIGASFGEERTPNDEPVYVGSVKSNIGHTEGAAGVASLIKVVLCLEKGTLVPNAGFVTLNPKIQTERWRL…
Alternaria_destruens_LH_A593_GCA_037044395.1	g8536	KS-AT-DH-ER-KR-xCP	MEEQAKDTSGPEPIAIIGMGCRFAGEASSVEGFWDMLRLGRKEHGRVPASRYQASAWEHPSHERKGAINHDSGFFLAEDPSRFDAPFFSITSKEAAGMDPVQRILLEVAYEAFENGGVPMESLPGSATGVYSGCMTNDYELLSTRDIMDMPHNSATGNGRTMLANRLSWFFDLRGPSIMLDTACSSSLTALHLATQALRAGECSQALVTGASLILHPNFTQRLSYMHMLSADGISHSFDSKANGYGRGEGFGAILLKPLSKAMAGGDAIRAIVRATGSNQDGRTPGITMPNATAQADLIRSTYSQARLSMGNTSYFEAHGTGTAIGDPTELSAIGASFGAERKPGDEPVYIGSVKSNLGHTEGAAGVASIIKVVLCLEKGMLVPNAGFSNLNPKIRLEE…
Alternaria_destruens_LH_A593_GCA_037044395.1	g8691	KS-AT-DH-ER-KR-xCP	MGIAHEFAIFQTKNGVNDSPNIGNNEKPRTNGFAALSGQPIAVVGMGMRLPGGVRTAEQFWDALIEKRDCSSEVPKSRYNVDGFYSADKPGAVRTRRGYFLEDDYIGNADLNFFPAIPGFEMDELDPQQTLLMEVIWECMENAGQTGWNGKDIGCYVGVFGEDWHELAAKETLSIPRVHAFANGAYTLSNRVSYQFNLKGPSATIMTACSSSLTALHEACQALNDGSCSSAIVAGTNMILTPSMTINMSDNTVLSPDGYCKAFDARANGYGRGEAVNAIYIKPLSRAIADGDNIRAVIRATSANYDGQSAKIFAPDIESQERLIRKAYQKAQIIDPSETGFFECHGTGTKIGDVVETTAIARFFGSRGMYIGSVKTNFGHGEGASGLTGVIKAILSLER…
Alternaria_destruens_LH_A593_GCA_037044395.1	g6448	KS-AT-DH-ER-KR-xCP-C-A-xCP-Red	MAGDLRGRRTSQEPEVSTKESSPGFSPFESASSVTSIDGPNPAVLVGYACRVAGADRPSKLWENIVQQKDVRCKMPADRFNVDNFFHPDGTHKGTTNAKYGYYLDQDLGHFDRSFFRISGKEAEAMDPQQRLILEVVYEALEDAGITLEEINGSRTSVLCGSFTNDYNAMLTKDLEHYPSYTVTGTGNAILSNRVSYVFNLQGMSLTIDTACSSSLVAFHLGAQSVQSGDCDTSIIVGSALHFDPNIFITMTDLGMLSEEGRSRAFAAGVKGYARGDGVCAVILRGQRQAELHGDDIRAVVRATGSNHDGTKQGITLPSAAGQEELIRKTYQSAGLDPADTTYVEAHGTGTGRGDPLETEALGTVFGSKRRQQPLYVGSIKSNIGHTEGASGLAGIIKA…
Alternaria_destruens_LH_A593_GCA_037044395.1	g4953	KS-AT-DH-KR-xCP-C-A-xCP-Red	MAPEREPIAIIGSASRFPGNATSPQKLWDLLIHPRNVGKVIPGDRFSVDGFWNADGSHHGTSNVTQSYFIEDDTRHFDANFFNINPREAAAIDPQHRLLLEVTYEALESAGLSIDILRGTPTGVYVGLMCADYLDVQLRDPEALAQYHATGTARSILSNRVSYFYDWKGPSVTVDTACSSSLVAVHQAVQALRQGECSTAMAAGVNLIFGPEMYIAESNLRMLSPTGKSRMWDARADGYARGEGVGVVILKRLGDALRDGDPIESVIRETAVNSDGRTNGLTMPSSASQADLIRQTYRRAGLDPTQASDRCQYFEAHGTGTPVGDPLEAEAIHSAFFPESHDGCQVQESQLYVGSIKTVVGHTEGAAGIAGLLKASLALQHEIIPPNLHFKRLNPNIVP…
Alternaria_destruens_LH_A593_GCA_037044395.1	g6402	KS-AT-DH-KR-xCP-C-A-xCP-Red	MVSGYVPPKEEPIAIVGSGCRLPGNATSPSKLWDVLRTPRELSKRVPSNRFNIDGFYHPDPEYPGTTNTKSAYWMEEDPRTFDASFFNITPLEAEAIDPQHRMLLEVTYEALESAGMSIQKMQGSSTSVYVGSVACDYGDIVMRDPVTLSQYTATGTHRSILSNRISYFYDWRGPSMTIDTACSSSLVAVHQAVRSLRSKESRVACAAGVNLILGPELFITESALHMLSPEGRCRMWDAGANGYARGEGIAVVLLKRLSDALADGDHIEAIIRESALNQDGRTKGITMPSAEAQARLIQETYRRSGLDPTTSWGRCQYFEAHGTGTQVGDVREAEAIASAFFPSQTTETNDGEGSKLQVGSVKTIIGHTEGTSGLASLLKVALAVQHRVIPPNLHLETL…
Alternaria_destruens_LH_A593_GCA_037044395.1	g1942	KS-AT-DH-MT-ER-KR-xCP	MGITVDEQNHASRSHEPIAIVGMAMRLPGRVNDSESFWRMLIEKRSGLCDVPKDRYHLDAFHDPHGKPGTVRMRQGYFLDDVDVRQFDSNVFSSPKKELERLDPQQRQLLEVSYECLENAGCTLWRGRKIGCYVGVFGQDWLDLNAKETQHMGAYRVTGYDDFVLGNRISYEFDLRGPSMTIKTGCSSSLVCLDLACKALRDGDCEGALVGGTSLIFSPTMSLALSDQGVLSPTGTCKTFDASADGYGRGEAINAIYIKTLRQAIQDGDPIRAVIRGTSVNCDGQTQGMLTPSPTAQEALMRRAYEMAGITDLGETAMIECHGTGTSVGDPLETTAVAKCFGETGIIITSVKPNVGHSEGAAGLTSLIKGVLALEHRQVPPNIHFSEPNPDIPFKTGKL…
Alternaria_destruens_LH_A593_GCA_037044395.1	g2226	KS-AT-DH-MT-ER-KR-xCP	MQSSNFEPIAVIGFGLKLPQQASTSAGFWDLLIQGRSARTETPTDRFNAEAFYKATAAGDRQRVGTIKTRHGHYIAESLDRFDAPFFSISPHEAECMDPQQRWLLEVAYHALENAGLSIEEVDGSNTSAFVGSFMNDFETMLHKDLDMPSTYHATGKASAILANRISWFYNLKGPSVAINTACSSSLVALHLACESLRTGETSMGLVCGSNLLFTPENTAGLSNLNFLSPDGICYAFDERANGYARGEGIACLVIKPLSAALSNQDPIRALIRGTGVNSDGRTPGISQPSPRAQIDLIRGTYARFGLALDQTRYFEAHGTGTQVGDPIEAEAIATVFRSGQHDRRPIYVGALKSNVGHLEGASGLAAVIKAILVLERGVIPPNIWHERRNPAIKEEWGL…
Alternaria_destruens_LH_A593_GCA_037044395.1	g2775	KS-AT-DH-MT-ER-KR-xCP	MQLLTTDGLVSRGGALQSSQALDGSDPVAVVGFSLRFPQDATSPQSFWKILQEGRSVTTEVPPDRFNINGFYHPDASRNDTVNARGGHFLKENVAAFDAPFFSMSPGEVESLDPQQRGLLETTYRALENAGIPVERAAGSATSVYVGALGVEYNRFFEFDEEVQATYKATGNSGAILANRLSWFYDLRGPSMTIETACSSSLIGLHLACQSLRSKESRMSLVCGSQLYLEPMTSAISLSALQFISPDSRCHSFGADGNGYAKGEGFGVLVLKRLSDAIADGDVIRAVVRATATNQDGRTPGISQPSQAAQEMLIREAYRSGGLDLASTRLFEAHGPGTKLGDPIEAGAIKSVFQKHRSPDDPMHIGAVKANIGHLEATAGLAGLIKTILSLEKGIIPPI…
Alternaria_destruens_LH_A593_GCA_037044395.1	g3008	KS-AT-DH-MT-ER-KR-xCP	MPSRENGLSGSAPNPGSQTNDASTTFSPIAICGMALRLPGGLGSPQDLWGFLIAKGDARSRVPESRYNVSAFHSPSKRPGTVVTEYGYFLDESIKLGALDASRFSLSRAELEAADPQQRQMLEVVRECFDDAGEVNFRAQPIGCYMGCYGEDWLELQNKDPQQNGMNRVDGYSDFMLSNRVSYEMDLRGPSITIRTACSSALVGLNEACLALQRGDCDAAVVGGSSLIFAPAATAFMTEKGVLSPDGSCKTFSADANGYARGEAITAVFVKPLAAALRDGNPIRAVIRSVMSNSDGKTPGIAHPSTDSQEALIRKAYRAAGITNMAETAFVECHGTGTPTGDPVETLAVARVFGDAGVYIGSVKPNLGHSEGASGLTSLIKGVLALENRIIPPNIKFTA…
Alternaria_destruens_LH_A593_GCA_037044395.1	g3585	KS-AT-DH-MT-ER-KR-xCP	MFFQRHPTPSTSSEGAYHLDEDREFAEPIAICGIGLKLPQDAASEDGFWKMLMERRSARTEFPKDRMNINAFYHPTRRNELGTRGAHFLQEDLSRFDADFFSITPSEAAAMDPMQRLLLETTVEALDTAGIRIEDLHGSRTSVHTGCFSNDYLHQLFKDPQRLPPYAAVGASPSMLANRISWFFNLRGPSFNIDSACSSSALAIDCACRLLLSGQTDMGLAAGCNLLLDPDYSIILSNNHMLSPDGRSYTFDARANGYSRGEGVAVLVLKRLSDALRDNDTIRAVIRATASNQDGRTPGITQPASEAQSQLIRETYAQAGLSLHHTRFFEAHGTGTPIGDPAEVSAIADCFRNHRTADSPLYLGAVKTNIGHLEGASGIAGVIKAILAVERGIIPPNTN…
Alternaria_destruens_LH_A593_GCA_037044395.1	g4676	KS-AT-DH-MT-ER-KR-xCP	MVSFSENRVHDAPGGNILAPLAVVGMSLKFPQDATSPEAFWNMLVEGRCVSTEFPTNRMNIDAHHDAERGRLHSVTCRGAHFMKEDLGLFDAPFFGINDADAKAMDPQQRLALETVYRALENAGLPIEQVAGSKTSVFAGSFCSDYHMLQIKDPLNVPKNATAGTGRNMISNRISWFYDFLGPSATVDTACSSSLMAVDLACQSIWGGNAAMGIAIGCNIILAPEMTIGLDNLGLLSRDSHSYSFDKRANGYARGEGVGAVVIKRLDDAIADGDTVRAVIRSSSSNQDGKTPGILQPSKDAQVRLIRDTYQKAGLDMGVTRYFEAHGTGTPIGDPIEARAIGTAFRSYRSEETPLYVGSVKSNIGHLEGASGIAGFIKAVLVLEKGVIPPNSSNLQNTN…
Alternaria_destruens_LH_A593_GCA_037044395.1	g5031	KS-AT-DH-MT-ER-KR-xCP	MDSLAVIGYAVRYPQDASDSVRFWDFLLKAREASTAFPEDRINQKAFYHPDPDHGGTIHAKRAHFLKDDPASFDAAFFKMSKTEVLSLDPQHRLVMENVYHALENAGIPMETAISSNTSVFVNGYNHDHADSLNTDPETILKYKPTGTENSMISGRLSWFYDFRGPSLTVETACSGSLVGLHLACQSLKTNESDMAIVSGVNVIGFLPHMVGMDYSGFMGSEGRCFAFDHRADGYARGEGVGTVILKRLPSALEDGDTIRAVIRGTGLNQDGRTPGITYPSLRAQVRLIETTYQNAGLETEDTCYIETHGTGTQAGDYVEASSINSGFKTATRGLPLYVGALKTNIGHLEGGSGIAGLIKTIMILETGIIPPNANFEKPNPKIPVDDWKIRLPIQCEAW…
Alternaria_destruens_LH_A593_GCA_037044395.1	g6238	KS-AT-DH-MT-ER-KR-xCP	MTSPDLHPPAEIRAAALAVANALTQNETYALVGGSACVILGSTRATLDIDFVVPRGETSNARQLLRASPDFDVEARTNHTTYKARRPVQIEILTPPLLFKEPFDQNTEVILVEGMKVLKPALLLNAKCGSIIGRSTEDKRKTDFFDINFLLNFCAENPEHLPKADEVPRAKKQLVHILVQFYGGEDAWSRAGYGFQKVRANEDGANHAVVTNSICLDGCHVGTDGKGPSTNGDHVPQTALQVPIAICGDARGPVPKSRYSTAAHYSERSKPSTVNTEYGYFLDESIDLSAVDTSFFNMRKAEVERLDPQQRQILEVARECMEDAGEVNRKGRSIGCYIGTFGDDWLEMFAKENQHHGPYRATGYSDFMLPNRVTYEMDLTGPSMLVRTGCSASLVALHE…
Alternaria_destruens_LH_A593_GCA_037044395.1	g9143	KS-AT-DH-MT-ER-KR-xCP	MPGQQLEPLAVVGISLRFPGEAVSPESFWQLILSGRSTGKEIPPDRYGIDAWHHPDYSQLDRVSQRKANFLEGDIGQFDAGFFSISAAEAEAMDPQQRLALETAYHALENAGYPIESITGSKMAVFTGAFSNDYQRLHAKDLMTLPKGHATGTSMNMLANRVSWFFNLRGPSSNVDTACSSSLMALHLACQSIWNGESSSGMAIGCNAILGLDTVLALDNLGILSKDGRSYSFDERGNGYARGEGVGALIVRPLRDAIKNGDNIRALIRSTGSNQDGKTPGITQPSMERQEDLYRDTYERAGLSLDVTRYVEGHGTGTAVGDPIEARAIGNIFRPYRSSDDPVYLGSVKSTIGHLEGASGVAGVIKAVLAVEKGIIPPNTDLQTLNPRIDEEFLHVKVP…
Alternaria_destruens_LH_A593_GCA_037044395.1	g967	KS-AT-DH-MT-ER-KR-xCP	MGDGLILVQTNVRDPNSSPIAIVGMACRLPGGVKSPDELYQFLLEKKNGVCEVPETRYTVGSFYSATDPGTVKTRHGYFLQEDPMLFDAPFFSISNYEAGRLDPQQRQLLEVVWECLENAGETNWHGKNIGCYVGVYGEDWIDLASKDPQATDRYHVLGTGQFALSNRISYEYDFQGPSMTLQSGCSATMIALHEACESIHSGDSCGAIVAGTNLILSPTMTATMSDNGVMSPTGTCRTFDAKADGYGRGEAVNALYIMRLEDAIRDRNPIRAVIRATTTNSDGKTPSITTPGSNSQEALVRRAYEKADIQDMAQTGFFECHGTGTVAGDTAEASAVANLFKGKGVIIGAVKPNMGHGEGASAITSIIKAVVSLENKMILPNAFFDTPNPDIPFKEGMI…
Alternaria_destruens_LH_A593_GCA_037044395.1	g4742	KS-AT-DH-MT-ER-KR-xCP-xCP-C-A-xCP-Red	MPIPTPKTPPQTNGNGVDGHSNGLRLNGKDHDGMQGQIAICGVAMRLPGGIQSPDAFWDLLEHGRDARGPVPLSRYNLEGFYDSLEGKETIKTRFGYFIEDDLTTLDASFFSLTKNELEKCDPQQRKLLEVTRECLEDAGEVNYRGERIGCYVGTFGEDWLQMSAKESQHSGGYIMTGHGDLMIANRVSYEYDFHGPSLVIKTGCSASLVALHEACRALQTGDATGAIVAGTNLIMGPTTTAAMTAEGILSPEGSCKTFDAKADGFARAEAITAVYIKPLAAAIRDGNVIRAVIRATGSNSDGKSQSLMSPNGAAHEALMRQVYEDAGLDPAETAYVECHGTGTPTGDPIETTAVGNVFGQKGVFIGSVKPNIGHSEGSSGISSLIKAVLALEHNIIPP…
Alternaria_destruens_LH_A593_GCA_037044395.1	g1584	KS-AT-DH-MT-KR-xCP	MTRTEPIAIIGTGCRFPGSASSPSRLWELLENPRDVASKPPPDRFNSDAFYQAGKARPGMMVAPEAYFLQEDIRAFDAPFFKVSPAEAASMDPQQRLLMEVVYEALERSGLPLQHLQGSYTGVYCGSMSNDYQSLINADLNMLRPFSVTGTTASILANRISYFFDWHGPSFVLDTACSSSLVALHLAAEALHNGDCSLAVVVGSNLILSPDPFIGESQMHMMSPTGRCHMWDAQGDGYARGEGVAALVLKRLQDAVADADPIECVIRSTGVNSDGHTEALTLPNGEAQRELIRSTYARAGLNPLRREDRCQFFEAHGTGTQAGDPQEAFGISSAFFDDGSHPDDFIYVGSIKSVTGHAEGTAGIAGVLKASLAIQHGVIPPNLPFNRLNPLVAPYTSHL…
Alternaria_destruens_LH_A593_GCA_037044395.1	g5171	KS-AT-DH-MT-KR-xCP	MSVPEPIAIIGTGCRFPGSASSPSRLWDLLLHPRNVASKTPKDRFNHDAFYHPDKHHGTGNSPESYFLTEDPRAFDAPFFNVSPVEAESMDPQQRLLLEVVYESLETAGLTLEALRGSDTGVFCGLMSTDYANLISRDWDEVPMYTPSGTAASMLSNRISYFFDWHGPSMTIDTACSSSLVALHQGVSALRNQDCHIALVAASNLIFSPREYIAASRMHLLSPSGRCRMWDESADGYARGEGVASVVLKRLSDAIADGDPIECIVRATGINADGRSMGITMPSSIAQLQLIRSTYASVGLNPADHLEDRCQFFEAHGTGTQAGDPQEATAIYNAFYGDSTLPEKSIKEPLYVGSIKTLIGHTEGVAGLAGVIKASLCVQKGIIPSNMLLERINPVIAPL…
Alternaria_destruens_LH_A593_GCA_037044395.1	g4462	KS-AT-DH-MT-KR-xCP-C-A-xCP	MDTSKEPIAIVGSACRFPGGCDTPSKLWEMLKQQRDVLQKIPKDRFNTDPFYHPEPTHHGTSNAQFSYLLEQDIGEFDAKFFNILPKEAECIDPQQRLLMETVYDGITAAGLPMEKLRGSNTAVYVGQMCDDWPGMLQTQLDESPPYMATGSSRSIVANRVSYFFDWHGPCMNIDTACSSSLVAIHEAVQTLRSGQSGIAVAAGVNILISPMYYISESNLRMLSSEGRCRMWDAAGDGYGRGEGIACVVLKTLSQAQRDNDHIECIIRETGVNQDGRTSGITMPSNIAQAQLIRDTYRRAGLDVHNPLDQPQFFHAHGTGTKAGDPQEATAIYHAFFTKETEPEQKLLVGSIKTHIGHTEGAAGLASVISTSLALQHGQVPPNMHFNELNPDILPFYGA…
Alternaria_destruens_LH_A593_GCA_037044395.1	g5014	KS-AT-DH-MT-KR-xCP-C-A-xCP-Red	MGSTLDRLEPVAIIGSACRFPGGVASPSQLWELLENPIELVRELPDDRFSADTFYHPKAQSPGHTNVKKAYTLTQDVRKFDASFFNISPAEAKAMDPQQRMLLEVTYEGLERAGVTIESLKGSDTGVFVGMMWNDYLTMQAQDNFNSPTYIGTGTARSIVANRLSYFFDWHGPSFTLDTACSSSLVAVHQAVRAIREGDCEVAVVAGVNLILGPENFVQESQLKMLSSDGRCKMWDRDADGYGRGEGVAVLVLKRLGAATMHRDPIECKIRNIEINHDGSKAGLTKPNSAAQADLIRKTYHKAGLDIHNPQDRCQFFEAHGTGTAAGDPAEAEAIYQAFSLEKQAWSDNHMYVGSIKTVIGHTESTAGIAGIMKASLSMQNGRIAPNLHLHNINPAISP…
Alternaria_destruens_LH_A593_GCA_037044395.1	g6670	KS-AT-DH-MT-KR-xCP-C-A-xCP-Red	MSASKNEPIAIVGSACRFPGDATSPSKLWELLKEPREVARPIDRFAASSFYHQDGHYHGASNVRDAYLLSEDPRYFDAQFFNIPPGEADSIDPQQRTVLETVYEAVESSGLVLEDMRGSDTAVYVGVMCDDYGNICYVDQEAVPTYAATGTARSILSNRVSFTFDWRGPSMTIDTACSSSLVAIHQSVQVLRSGNSNIAVAAGANLIFSPNMFIAESNLNMLSPTGKSQMWDANANGYARGEGIAAVIMKRLSDAIRDGDHIECVIRETGCNQDGHTPGITMPSQEAQTKLIHDTYRRAGLDLSKPEDRPQYFEAHGTGTKAGDGVESKAIYHAFFPEGQTTDESLWVGSIKTIIGHTEGTAGIAGVMKASLAIQNKTIPPNLHLKTLNPEIIPYYGKL…
Alternaria_destruens_LH_A593_GCA_037044395.1	g2228	KS-AT-DH-xCP-MT	MTAAIDPIQASAAFFNPQSRAPDPADLSALYIFLSKHPHGKTLLHHVASLTDVLHLFADHREDVRNLPNAENYVRLLIDWANGGPSAPVSEARTGIIALPLLLILQLGEYLRYLDFHGISHADFIAQIQKGGGIHGCCAGEPPALSIACAKDEGQIMDNAAVFLRIMVGMGAYIEALDDWTTSESNILAVRLKYEGQEEEFTKMFPRVSPKMLANLERKAQPRTLSFIGNAKSIAAMYEYCRENGLPADKMDVTGKAHNPENEHVVPEFMDILNRNSSMLQLPQQSRLQVTVRSSITGKALTDAEIMEDMITMMLASCCDWYGLVSQVALDLKASERPAHRLVIFGLNDSVPLSPFNKQRLKTFKFKANQLLVSDPQPNSSTAFPSKLPEFPDSTIAIV…
Alternaria_destruens_LH_A593_GCA_037044395.1	g7619	KS-AT-xCP-MT-Red	MVSTPTISRQRPGSACEECRRRKVRCDRRRPQCQVCFETGIECKINTTRLPRGPRKGQLRTLRTRIAALERCLADQHPEINHQMASIFDGTVIDCDSEEDPLRDLPPLPDSISGTMPDQSSEDRRTGTRSPRSPESPNRPSSLVSDLMRADLDQLYFDRVHPFAPILQRWRYHTWAKQPKKTEAQTCLQYAMWTLAASMSAQFQPLRDRLYAETRRMLDSLDLQGPPTDTAPGIEPAQAWILVCIYEYMQQSPLQAWMSTGRCCRLVLGMRLYELDDPNSPVTMAREHETVLVDWIGLEEQRRTFWMAYSLDRFISFHNGLPFTLDEQLITTRLPCPEEDFQAGQPTLTSYLSDVMSPSAPTSPIPTATTMPSPTVFGRSSHSQILHPHPPPPTPTATP…
Alternaria_destruens_LH_A593_GCA_037044395.1	g5020	SAT-KS-AT-PT-xCP	MSAPTKLVFFGNEFPNDDLKTLFRGLHRHSKDRRFRQLATFLEESTRVLQNEVAQLPEPLKKLVPHFENLMPLTEVDFRQGPLGAAMESALLTILELGMFIGHYEAEERAWDLSADRTTLAGLSIGLLAAAGVALSTHLAEVVQNGAECVRVSFRLGVYVHDISRKLEAPQADGSLLSWAHVVTGESASDLQEELSRYNTETGTPELLKVFISAADKTSVSVSGPPSRIRAAFRASQRLRYSKSLALPVYDGLCHAAHLYDEETIHRVLHPDGSVIPTSRPVQLALLSSRSGQPFEATTAAELFRAISTELLTGTIFLDNITAGILDRTERCADTTKCQIETYRTSLVFKGLLKALEACFPDRTISTTDLIPWVFQDYGARQPKSCADSKLAIVGMACR…
Alternaria_destruens_LH_A593_GCA_037044395.1	g4700	SAT-KS-AT-PT-xCP-xCP-Te	MSKMETVAEVFIFGDQTVAFESTLHSLLHVKDNAVLTDFFDRVGYQLRRYVGNLPLHQQEWFPYFTTLIDLLAQHENCHAAPALKLPLLCATELGQFIRHYGQAGRTYPAPESTFLIGACTGAFAAAAVATSQTLAELVPAAVEAVTVAFRTALRSLILRNDLELNIDGSQKSWSAIVGVCEPEAASAIRCFNVEKGLPPIARLYLSSVSRTNVSISGPPRLLGQFLLSCAWKHSLLPIELPYHASHLFRKDDVEIIVGDFHDFSLLKYTQRTKVICAVSGEVVVASDLRSLLHRAVQEALCEPLQWNCIAASLSRELKQCQLTECVINQVSTRSGSLISSALSQEAFLGVKIVQSIGDVAVSPALSSPTGKFSQSSIAIIGFSGRFPESDSNEEFWEM…
Alternaria_destruens_LH_A593_GCA_037044395.1	g8670	SAT-KS-AT-PT-xCP-xCP-Te	MEGPSRVYLFGDQTSDIEAGLRRLLQAKNSTIVQSFFQQCFHAIRQEIAKLPPSQRKLFPRFTSIVDLLSRSRESGPSPVLESALTCIYQLGCFIHFYGDLGHDYPTPSNSHLVGLCTGVLSCTAVSCAKNVGELIPAAVEAIVIALRLGICVFRVRELVASADSESTCWSALVSGISEAEASRLIDEYSSKKATPPSSKPYISAVSSNGVTVSAPPTILDEFVETCISKNYKPVKAPIHGPYHAPHLYDDKDIERILHQSSALEELTGWSPAIPVISSNTGKPIKATSIKDLFKVALEEILLRRLCWDKVTESCTSVCKTCKNHSCKLFPISSSATQSLFTVLKKAGVSISLETGVGEIAINPETRNLTGKAENSKIAIIGMSGRFPESDGTEAFWDL…
Alternaria_ethzedia_DAOMC238797_GCA_040583925.1	g3607	KS-AT-DH-ER-KR-xCP	MNTSTDSEQPSMAPSSQPSSVEPIAIVGFGFKFPQDITDAQSLWKLLMERRSTMTEIPKNRWNIDGFYKEHGHRPGTVKNRGGHFLADDPARFDAPFFSIQPAEAECMDPQQRLLLETSYHALENAGIPMQAAIGTRTSVHVGCLLQEYSQISQRDAQMPGDYRIVGSSGLAMLANRLSWFYDFSGPSMTVDTACSGGLVALHLACQELLAGSVDMSLVGGNNLCLLPDSTALLSSLNMMSKDSVCYSFDERASGYARGEGFGVLILKRLDKAIADGDTIRGVIRSTGCGQDGNTPSITSPSQSAQERLIRETYARAGLDLGDTRYFEAHGTGTPVGDPCEAAAINNVFSSRTPEDPIFVGALKGNMGHPEGASGIAGVIKSLLVLEKGIIPPNVYPER…
Alternaria_ethzedia_DAOMC238797_GCA_040583925.1	g10023	KS-AT-DH-KR-xCP	METPDSDQYSSSSFSPVPVHSSVTEAELGELGECNDVAVIGMACRVAGGNHSPEQLWESILAKRDASSEIPAMRWEPYRHRDVRNIKALDEATSRGYYLDALEDFDPSFFGISPKEAEQMDPQQRISLEVAWEALESAGIDPKKLSGTDTAVFMGVNSDDYGKLLLEDLPNIEPWLGIGTAYCGIPNRISYHLDLMGPSTAVDAACASSLVAIHHGRQAILLGESKMAITGGVNAICGPGLTRVLDKAGAISPDGSCLSFDDNAHGYGRGEGAAIVVLKRIRDAIRDGDNVIAILKGSAVAQDGKTNGIMAPNAKAQELVARQALKRANVNPATVEYVEAHATSTPLGDPTEVSAISAVYGVTRSKPVNVGSVKPNVGHLEAGAGAIGFIKAVLALNKA…
Alternaria_ethzedia_DAOMC238797_GCA_040583925.1	g10000	KS-AT-DH-MT-ER-KR-xCP	MAYEDTKPMPIAIVGFGCRFPGDVTNGEKLWQMLVEKKSARTEVPSDRFNVDAFYNPDGDRFGTCNNRGGHYLAEDVSLFDAPFFSISPAEAMAMDPMQRLLLEVTYEALENSGTPLARVSGSQTSCYVGCFTKDYEEMQRRDMELAPKYQSTGASQTMLSNRLSYFFNLKGPSVSIDTACSSGLVAVHLACQSLRCGESSMAIAGGSNLILSPDIQIEMSDMHFLSPDSISHAFDDRANGYARGEGVGAIILKPLDLAIRDNDPIRAIIRGTAASSDGRTPGITMPSKDAQVDLIRSAYRAAGIDVSETGYFEAHGTGTAAGDPIESGAIGEVFATSRPHRISATTEEVVPLSIGSVKTNMGHLEGASGIAGLIKAMLSVEKGMIAPNLWFERGNPAI…
Alternaria_ethzedia_DAOMC238797_GCA_040583925.1	g1370	KS-AT-DH-MT-ER-KR-xCP	MATTDKTTPIAIIGMNMKFPGDAVSASSFWDLIMSARNVSKEIPADRFNIDAFYHPDPNRLDSLRIRHAHFMEEDPRSFDAPFFNMSYAEASVLDPQQRGLLEGAYRTFENAGIPMGTLSRSSTSVYCASFSRDGETITGRDFSAQSRYHATANGSSMLSNRISHFFDLAGPSLTVDTACSSGLYALHLGAQSILAGESKMSLVCGANTFITPESQALALSNGGFLSVDGKSYSFDAKANGYARGEGFGFVLLKPLDAALRDGDVVRAVIRATGANQDGRTPSITQPSQQAQLDLLRDTYRVAGLDVADTDYAEAHGTGTPVGDPVEAGAVGQAFRDGRKADRPLYMGSVKANIGHLEGASGMAGVIKAVLALENAAIPPIAMFEKPNPAIDVTGLQLA…
Alternaria_ethzedia_DAOMC238797_GCA_040583925.1	g1403	KS-AT-DH-MT-ER-KR-xCP	MARSEDPEPMAIVGMGCRWAGGVRNPTDLWELLLNKRSGYQDWAAPRFSAEGFYHPNPERPGTTAAKGGYVVTEDPRLFDPSFFGISGLEAETIDPSQRKLLEVVYESLESAGETWESVNGTRTGVYVADISYDNSYAQTRDWEYARPHATTGVCHNILSNRINYVFNLRGPSVTLDSACTSAMYGLHMAIQAIRDGDCDSAIVATANYIMDPSMQIAMDKLGALSGTSMSHAFDAAADGYARGEGFAAIYVKKPQQAMQHGNPIRALVRGSAIGANGRSSGITHPSGTAQEDIIRKAYHNAGKLSPSETPFLECHGTGTRVGDPLEVEAAGKVFGPGRSSSEEDRLLIGSVKTNLGHTEGAAALASIFKVVLALEAGVIPPSIGVTTLNPRIDFDKAK…
Alternaria_ethzedia_DAOMC238797_GCA_040583925.1	g6196	KS-AT-DH-MT-ER-KR-xCP	MNKPIAIIGISFRGPGDARDPEAFYRMLVEGRSARTEIPKDRYNVDAFYHPDPERLGSIQQRHAHFLEQDFKVFDAPFFSITPKEAKAMDPTHRILLEATYEGFENAGLTLEQVSGTQTSCYIGTFTADFPNLQARDNEGPSIYHATGMSASLASNRLSWFYNLRGPSLTVDTACSSSLTAFHLACQSIRTGEAEMSVVGGANLMFGPDMSILLGAAKILSPEGKSKMWDADANGFARGEGFGVTILKPLDAAIRDGDNIRAVVLATAANEDGRTPGISLPNSEAQQELIRTAYRQAGVDPAETGYVEAHGTGTQAGDPLEARAILKTIGSVENRLSDLYVGSVKTNIGHLEGAAGVAGIIKAALTVERGMILPNLWFEKLNPDIDLPENVKIASKLTP…
Alternaria_ethzedia_DAOMC238797_GCA_040583925.1	g7118	KS-AT-DH-MT-ER-KR-xCP	MEPIAIVGLSYKLPEGHNEDHSFWDNLQRGRSLSRPWPKSRGNIDAFYNSNVAMDNTVYSTNAHFVKEDPAAFDAAFFSITSKEAASMDPQQRWLLETSYKALENAGIPPETLAGSQTAVFAASMSDDYSRILARDPDEAPTNTATGTSPSILANRLSWYFDFKGPSIQLNTACSTSMIAMDLACHSLRSGQSSMALLAGANVLLSVEISLYLSNMQMLSPDGVSYSFDHRANGYARGEGAVVLVLKRLSDAIRDSDVIRAVVRATGSNQDGRTPGITQPSAESQEQLIRHVYKSCNLGFESTRYVEAHGTGTQLGDATEMKAIGRAFRASRSQKHPLYVGSVKSNIGHLEGCSGLAGILKSIMILEMGVIPPSALFEKISPKINAKIYNVEVPTKCIP…
Alternaria_ethzedia_DAOMC238797_GCA_040583925.1	g7300	KS-AT-DH-MT-ER-KR-xCP	MPLYYTDTTPTNGIPDMNGVPSDAPPQSKSDDLSNAIAIVGISCKFGGSASNLDGLWHTLSSGESCWSPVPKSRFDISKTSHPDSQRTDSLHVKGGFFIEDDLTEFDAPFFNLTAEVAKSMDPQLRLMLEGVYNATESAGLPIEKLSGSNTSVYSATFGRDYAEMLMKDADSMPTSLVTGNGPAMFANRVSHFYNLMGPSVTVDTGCSGGLVALHMGVNSIRNQESEVSIIGASNAILNQDFYIAISNLGLLHEDGKCYSMDHRFGGYGRGEGMAVLVLKKYSAAVRDGDHIHALIRESAVNQDGRTGTITSPSMDAQQQLIKQCYSRAGIDLSSTGYVEAHGTGTGGDAIEAEALALTFGNSREKFDPIWVGSVKSNIGHTEPVSGLAAVIKAALILR…
Alternaria_ethzedia_DAOMC238797_GCA_040583925.1	g5364	KS-AT-DH-MT-KR-xCP-C-A-xCP-Red	MTAHRETPHGNGEPIAVIGSGMRFPGSSNNSSKLWELLLNPRDLLKRIPEDRFNIDNFYHPDPNHHATTDVRESYFLEEDHRHFDAGFFNIKPVEVAAIDPQQRLLMEVVYESLEAAGIPLESLIGSRTGVYVGLMCADYHDHLHKDVDTLPTYAPTGTARSIMSNRISYFFDWHGPCMTIDTACSSSLVAVHQAVQLLRSGDSDVAVAAGVNMILGSGQYIAESSLHMLSADSRSRMWDADASGYARGEGVASVIMKRLSTALADGDKIECIIRESGVNQDGRTKGITMPSASAQMDLIEQTYKKAGLDPKDPNQRCQYFEAHGTGTAAGDPKEAEAISKAFFHPGDSTSHKGDPLYVGSIKTVIGHTEGTAGLAGLLKASLAVQHGVIPPNLLFNKL…
Alternaria_ethzedia_DAOMC238797_GCA_040583925.1	g11608	SAT-KS-AT-DH-xCP-xCP-MT	MRTQSDHFAPSVAFFCPQSKAPTEAYLEQLQKYIVETPLLLPFAEAITSLTDTWTILCDGHPDIAKLKSGKRHVVSLKRWITDGISGPVSSSMSGILALPLLVVIQICQYFQLLELHGLTHERMLASLKKGGGAQGYCGGLPTAFAVSCAKDEEEVVHLATKALRLAFAVGAFGELGDDELVEGATTIAVRLRTPPQGDELVAGIPRCYISAITDPKTISIVGPVLELEKVAERARNRGLLVTDIHIRGKVHNPENAPLVKVLFDICREHDDMMLPDASQLRVPVRSNLDGSLLHDCSLTHEAINTILASRCEWYRLLKDVAQDLAGSGTDAHTFALFGIGDPVPLMPFHNARLRISKMEVHTTVQGARLAEYKYPEDAIAITGVSCRLPRAADLEELW…
Alternaria_ethzedia_DAOMC238797_GCA_040583925.1	g400	SAT-KS-AT-PT-xCP-xCP-Te	MNVLIFGDQTADQYPLLRKACTWKNNSTLTSFLDRVSQVVREEVQKLPRTQRDQIPNFLTTWDLIEAYYAKGLKVPQLESCMVTIAQLSHYIGYYAENPSDLKNPANTRVVGLCTGLLAGSVVASARSLSELLPLAIEAVRIAFRTGTVVGAAKEALEQTPVPKETWSTIVTSISEKAAKDAITAFHQEQRIPTLAQAYISAVSTMALTISGPPSTTKRLLQSDAFKGCTRVSIPVYAPYHAAHLYTEADIDQILDKDATRHLQQFRPLSLVHSASTGECHTATSTLDLIRTALSEILVESVRWDNLLSEVVSQVTATSSQDCSVSAIGVTSITNSLVSALKSGGQSSVTARDHTSWVAAEHDSRGRTQNDKIAIVGMSGRFPGAANPDALWDLLEKGL…
Alternaria_gaisen_FERA_650_GCA_004156025.2	g4312	KS-AT-DH-KR-xCP	MNGKSRDNGHDGKRQPVVPAEPIAIVGTAMRLPGDAANPSKLWQLLRNPPSDLSRRPPSERFSSAGFFHEDPEHHGTSNSEQSYFLREDIRAFDAAFFSIAPREVEAIDPQHRLLLEVVYEALEAAGIPLEKTQGSDTAVYVGQMSNDYWDHLLRDLDSIPKYMATGTARSVTANRLSYFFDWHGPSMTIDTACSSSMVALHEAVQVLRSGRADMAVAAGCHLVLGPESYVIESKLRMISPTGTCKMWDAGADGYARAEGCAALILKTLSSALRDGDPIAALIRETGVNQDGRTRGITMPSAEAQAALIRETYLRAGLDPTHPRDQPQFFEAHGTGTQAGDPVEAEAIHLAFFNDDVAHKGTREKKEHVKLLVGSIKTVVGHLEATAGLAGILKGIAAM…
Alternaria_gaisen_FERA_650_GCA_004156025.2	g1802	KS-AT-DH-MT-ER-KR-xCP	MNKPVAIIGIAFRGPGDARDPEAFYRMLVEGRNARTEIPKDRYNVDAFYHPDAERLGSIQQRHAHFLQQDFKVFDAPFFSITPKEAKAMDPTHRILLEATYEGFENAGLSLEKVSGTQTSCYIGTFTADFPNLQARDNEGPSIYHATGMSASLASNRLSWFYNLRGPSLTVDTACSSSLTAFHLACQSIRTGEAEMSVVGGANLMFGPDMSILLGAAKILSPEGKSKMWDANANGFARGEGFGVTILKPLDAALRDGDNIRAVVLATAANEDGHTPGISLPNSEAQQELIRRAYQMAGIDPAETGYVEAHGTGTQAGDPLEARAILKTVGLVEGRKSDLYVGSVKTNIGHLEGAAGVAGIIKAALTVERGMIPPNLWFEKLNPEIDLPENVKIASKLTL…
Alternaria_gaisen_FERA_650_GCA_004156025.2	g4696	KS-AT-DH-MT-ER-KR-xCP	MEPIAIVGLAFKLPQDIEDDASFWHILEQGQSMMTEWPKSRVDVNAFAISPEASLNTLTSTRGHFLKQNLASFDAPFFSISSKEASAMDPQQRMLLETSYHALENAGIPLSRIAGTETGVFVGTMESDYHRTISKDPDDAPLTTATGISVSIMANRLSWYFDLKGPSMQLNTACSSSMIAVDLGCQSIRSGQSSTVLVAGSSLMLDPEYSLYLSNMNMLSPDGICHSFDDRANGYSRGEGIIVMVLKRLSTAISDGDNIRAVIRGTGSNQDGRTPGITQPSSVSQENLIRHTYRTCNLGFESTRYIEAHGTGTQIGDAMEMRALGAVFRTARSPRAPLLVGSVKTNIGHLEGGSGLAGIAKSILILEKGFIPPNALFERLNTKVNAKRNNIEVPASCIR…
Alternaria_gaisen_FERA_650_GCA_004156025.2	g5046	KS-AT-DH-MT-ER-KR-xCP	MASSMTSEPIAIIGMSCRFPGGASEPARLWDVLSSGQSAWSEVPKDRFNMEAFHLKGDPHSSTTNTPGGHFLDSDIATFDCSFFEIKPTEARAMDPQQRLTLELAYEAFENAGLTVSQIWGSSTGVYIGQWSSDYSEIMARDPENQELYHTLGTGAAITSNRVSFFFNLRGPSFTVDTGCSASLVALHNAVQSLRSGESTMSLVGGVNVLLDPQRFTYQSKLKMFSPDGRSFSFDERANGYGRGEGCGCVVLKPLSFAIKDGNMIRAVIRNSALNQDGRTSQGISVPNGEAQEELIRRAYAEAGLVPAETDYVEAHGTGTAVGDPIEAKAIANVLARPREATQGPLIMGSVKGNIGHTESAAGIAGLIKSVLMLENQAVAPQVNYEKPNPKIPLHSWNL…
Alternaria_gaisen_FERA_650_GCA_004156025.2	g6154	KS-AT-DH-MT-ER-KR-xCP	MLYQSTNGTNGINGFHDRNGDNNVHGTNVHRSGDVQSTNLDDMSNSIAIVGISCKFGGAASNLDGLWHTLANGESCWSPIPKSRFDVSNTYHPDPLRTDSLHVKGGFFIDEDLTKFDAPFFNLTADAAKAMDPQLRLLLEGVYQATEDAGIPTEKLSGSNTSVFSASFGRDYTEMLMKDAEALPTSLVTGNGPAMFANRVSHFYNLRGPSVTVDTGCSGGLVALHMGVNSIRNRESDVSIVGASNAILNQDFFIAISNLGLLHKDGKCYSMDHRWGGYGRGEGMAVLVLKKFSAAVKDGDHIHAVIRESAVNQDGRTGTITSPSMDAQRSLIQQCYSRAGIDLASTGYVEAHLTGTGGDAIEAEALARTFGKSREACDPVWVGSVKSNIGHTEPVSGLA…
Alternaria_gaisen_FERA_650_GCA_004156025.2	g9766	KS-AT-DH-MT-ER-KR-xCP	MTTDRTTPIAIIGMNMKFPGDAVSAQAFWELLMSARNVSKEIPSDRFNIDAFYHPDPNRLDSLRIRHAHFMEEDPRSFDAPFFNMSYAEASVLDPQQRGLLEGAYRTFENAGIPMETLSRSPTSVYCASFSRDGETITGRDFAAQSRYHATANGSSMLSNRVSHFFDLAGPSLTVDTACSSGLYALHLGVQSILAGESAMSLVCGANTFITPESQALALSNGGFLSVDGKSYSFDEKANGYARGEGFGFVLLKPLEAAIRDKDVIRAVIRATGANQDGRTPSITQPSQQAQLDLLRDTYRVAGLEVADTDYVEAHGTGTPVGDPIEAAAIGEAFRDGRKSDRPLYVGSVKSNIGHLEGASGMAGVIKAVLALEKAVIPPIAMFEKTNPAIDTEYLQLAF…
Alternaria_gaisen_FERA_650_GCA_004156025.2	g1239	KS-AT-DH-MT-KR-xCP-C-A-xCP-Red	MSNLEPIAIVGSACRFPGDSDTPSKLWQLIKSPRDLLRQVPEERFDAEAFYHPDSRHHGTTNAIKSYFLDEDPALFDNGFFNIPQSEAEAVDPQQRLLMETVYDSLCAAGQTIEELRGSSTAVYVGLMCDDWAGILAQDPDVLPQYGATGMARSIMSNRISYFFDWHGPSMTIDTACSSSLVAVHQAIQTLRSGESQVAIAAGANLILTPGMYIAESKLSMLSPSGRSRMWDKDVDGYARGEGIAAVVLKPLSAAIRDNDHIECLIRGTGVNQDGRTNGITMPSATAQAALIRDTYARAGLDVNKPEDRPQFFHAHGTGTAAGDPQEAEAISKAFYSTNDCDETLYVGSIKTVIGHTEGTAGLASLISTSLALQHKVIPPNMHFNTLNPRLKPFYDHLE…
Alternaria_gaisen_FERA_650_GCA_004156025.2	g6658	KS-AT-DH-xCP-xCP-MT	MRSQSSHFAPSVAFFCPQSKAPTEAYLEQLQRDTWNTLCKGHADIANLKSGERHVVSLERWITNGIAGPVSSSMSGILALPLLVVIQICQYFQLLELHKLTHEQMLSSLRNGGGAQGYCGGLPTAFAISCAKDEEDVVRLATKALRLAFAVGAFGELGDDESIKGATTIAVRLRASQQGEELVEGIPGCYISAITDPRTISIVGPVIELTKVADRARDQGLLVTDIHIRGKVHNPENAPLVKVLFDLCQEHDDMTLPDASQLRVPVRSNLSGKLLNNCSLTHEAINTILASRCEWYRLLKEVAQDLAGSGIDSHTFALFGIGDPVPLMPFHNARLRVAKVEAHTTIQEARLAEYRYPEDAIAVTGVSCRLPRANDLEELWQLLAAGTSTCEEIRHDRVP…
Alternaria_gaisen_FERA_650_GCA_004156025.2	g11449	KS-AT-PT-xCP	MIRAKVLYFSGEIPQGDPEGDQRDLFRKLHLLSKERSYPILALFLGTITRAVKEEQRRLIRTERDLIPAFESILDLTDHVCRSLEISPDEINAAGAWIYCVYGVDPSEAQEAVKLFNAEKKYAETSVASVFNDDGKSVSIGGPPSTLKTLFTECEFFKRTRNVPMKKVQGMWHTGKVYGIEHVQQVVPHIDEKHRLHLSLFSPVTGQPFEAANANELLEQIMEEMLTQRIQWDRTIQSVTERLKQVSPNSTQLIAIQPSQYVESLLAQWKAEIPTATHTAKDMMSAIMNLPLGSSPAKDAKSSKIAVVGMACRFPGGADNTQRFWELLVQGHDAHGPVPPDRFNVETHVDPAGKTPNTSKTPYGCFVDDPGLFDAMFFGMSPREAEQTDPMQRLALVTA…
Alternaria_gaisen_FERA_650_GCA_004156025.2	g11714	SAT-KS-AT-PT-xCP-xCP-Te	MNVLIFGDQTADQYPLLRKACTWKNNSTLTTFLDRVSQVVREEVQKLPRTQRDQIPNFLTTWDLIEAYYAKGLKIPQLESCMVTIAQLAHFIGYYAENPSDLQNPANTRVVGLCTGLLAGSVVASARSLSELLPLATEAVRIAFRTGTVVGAAKEAVEQASAPKETWSTIVTNMTEKAAKDAITAFHEEQQTPTLAQAYISAVSTMALTISGPPATTKRLLQGDAFKGCARVAIPVYAPYHAAHFYNSADIDQILDKDAIRHLQQFRPLSLVHSAATGKCHTATSTLDLIRSALTEILVEPVRWDNLLTEVVSQVTATSSQDCSVSAIGVTTITNSLVSALRNGGQSSVTARDHTTWVAAEHDSRGRTQNDKIAIVGMSGRFPGAANPEALWDLLEKGL…
Alternaria_hordeiaustralica_BMP_2776_GCA_023758085.1	g11233	KS-AT-DH-ER-KR-xCP	MNTSTDTEQPTMASSSQPSGVEPIAIVGFGFKFPQDITDAQSLWKLLMERRSTMTEIPKNRWNIDGFYKEHGHRPGTVKNRGGHFLADDPARFDAPFFSIQPAEAECMDPQQRLLLETSYHALENAGIPMQAAIGTRTSVHVGCLLQEYSQISQRDAQMPGDYRIVGSSGLAMLANRLSWFYDFSGPSMTVDTACSGGLVALHLACQELLAGSVDMSLVGGNNLCLLPDSTALLSSLNMMSKDSVCYSFDERASGYARGEGFGVLILKRLDKAIADGDTIRGVIRSTGCGQDGNTPSITSPSQSAQERLIRETYARAGLDLGDTRYFEAHGTGTPVGDPCEAAAINNVFSSRTPEDPIFVGALKGNMGHPEGASGIAGVIKSLLVLEKGIIPPNVYPER…
Alternaria_hordeiaustralica_BMP_2776_GCA_023758085.1	g11602	KS-AT-DH-ER-KR-xCP	MFPPNLNNCEADFADARVQTLSTVEAGGVMNVSCQAHDTQRQILRSPYHTRPDFFCLNHCKPLITSCLNMVINDSGHEDYGLNQRASAVSAAPKPRRYTQEPIAVVGMGCRLPGDSNSPHALWDFLERGGIADNTPPRSRFRLDTHHDGSKKPKTMRSPGGMFLENIDPKKFDAAFFSTGKLDAIAMDPQQRQLLEVVYECLENAGIPLEKLDGEAIGCFVGSYGVDYADMQARDPDDRAPSVTIGVGRAILSNRISHFLNIHGPSMTIDTACSGSLVGVDVACRYLSSGEIDGALVAGANLYFNPEHNMDSGPMKGASSLSGRCHTFDKKADGYIKGEAINCVMLKRLCDAERDGDPIRAIIRGTSTNSDGKTPGIASPSSEAQAKATRAAYANAGIS…
Alternaria_hordeiaustralica_BMP_2776_GCA_023758085.1	g3712	KS-AT-DH-KR-xCP	METPDSNQYSSSSFSPVQVHSSVTEAELGELGECNDVAVIGMACRVAGGNHSPEQLWESILAKRDASSEIPAMRWEPYRHRDVRNIKALDNTTSRGYYLDALEDFDPSFFGISPKEAEQMDPQQRISLEVAWEALESAGIDPKNLSGSDTAVFMGVNSDDYGKLLLEDLPNIEPWLGIGTAYCGIPNRISYHLNLMGPSTAVDAACASSLVAIHHGRQAVLLGESKLAITGGVNAICGPGLTRVLDKAGAISPDGSCLSFDDNAHGYGRGEGAAVVVLKRFRDAIRDGDNVIALLKGSAVAQDGKTNGIMAPNAISQELVARQALKQAKVDPATVEYVEAHATSTPLGDPTEVSAISAVYGVSRSKPVNVGSVKPNVGHLEAGAGAIGFIKAVLALNKA…
Alternaria_hordeiaustralica_BMP_2776_GCA_023758085.1	g10878	KS-AT-DH-MT-ER-KR-xCP	MATTDKTTPIAIIGMNMKFPGDAVSASSFWELIMNARNVSKEIPADRFNIDAFYHPDPNRLDSLRIRHAHFMEEDPRSFDAPFFNMSYAEASVLDPQQRGLLEGAYRTFENAGIPMETLSRSSTSVYCASFSRDGETITGRDFSAQSRYHATANGSSMLSNRISHFFDLAGPSLTVDTACSSGLYALHLGAQSILTGESKMSLVCGANTFITPESQALALSNGGFLSVDGKSYSFDAKANGYARGEGFGFVLLKPLDAALRDGDVVRAVIRATGANQDGRTPSITQPSQQAQLDLLRDTYRVAGLNVADTDYVEAHGTGTPVGDPIEAAAVGQAFRDGREVDRPLYVGSVKANIGHLEGASGMAGVIKAVLALENAVIPPIAMFEKPNPAIDVAGLQLA…
Alternaria_hordeiaustralica_BMP_2776_GCA_023758085.1	g2544	KS-AT-DH-MT-ER-KR-xCP	MNKPIAIIGISFRGPGDARDPEAFYRMLVEGRSARTEIPKDRYNVDAFYHPDPERLGSIQQRHAHFLEQDFKVFDAPFFSITPKEAKAMDPTHRILLEATYEGFENAGLTLEQVSGTQTSCYIGTFTADFPNLQARDNEGPSIYHATGMSASLASNRLSWFYNLRGPSLTVDTACSSSLTAFHLACQSIRTGEAEMSVVGGANLMFGPDMSILLGAAKILSPEGKSKMWDADANGFARGEGFGVTILKPLDAAIRDGDNIRAVVLATAANEDGRTPGISLPNSEAQQELIRTAYRQAGVDPAETGYVEAHGTGTQAGDPLEARAILKTIGSVENRSSDLYVGSVKTNIGHLEGAAGVAGIIKAALTVERGMILPNLWFEKLNPDINLPENVKIASKLTP…
Alternaria_hordeiaustralica_BMP_2776_GCA_023758085.1	g3314	KS-AT-DH-MT-ER-KR-xCP	MEPIAIVGLSYKLPEGHNEDHSFWDNLQRGRSLSRPWPKSRGNIDAFYNSNVAMDNTVYSTNAHFVKEDPAAFDAAFFSITSKEAASMDPQQRWLLETSYKALENAGIPPETLAGSQTAVFAASMSDDYSRILARDPDEAPTNTATGTSPSILANRLSWYFDFKGPSIQLNTACSTSMIAMDLACHSLRSGQSSMALLAGANVLLSVEISLYLSNMQMLSPDGVSYSFDHRANGYARGEGAVVLVLKRLSDAIRDSDVIRAVVRATGSNQDGRTPGITQPSAESQEQLIRHVYKSCNLGFESTRYVEAHGTGTQLGDATEMKAIGRAFRASRSQKHPLYVGSVKSNIGHLEGCSGLAGILKSIMILEMGVIPPSALFEKISPKINAKIYNVEVPTKCIP…
Alternaria_hordeiaustralica_BMP_2776_GCA_023758085.1	g6463	KS-AT-DH-MT-ER-KR-xCP	MAYEDTKPMPIAIVGFGCRFPGDVTNGEKLWQMLVEKKSARTEVPPDRFNVDAFYNPDGDRFGTCNNRGGHYLAEDVSLFDAPFFSISPAEAMAMDPMQRLLLEVTYEALENSGTPLARVSGSQTSCYVGCFTKDYEEMQRRDMELAPKYQSTGASQTMLSNRLSYFFNLKGPSVSIDTACSSGLVAVHLACQSLRSGESSMAIAGGSNLILSPDIQIEMSDMHFLSPDSISHAFDDRANGYARGEGVGAIILKPLDLAIRDNDPIRAIIRGTAASSDGRTPGITMPSKDAQVNLIRSAYRAAGIDVSETGYFEAHGTGTAAGDPIESGAIGEVFATSRPHRIAATSEEVVPLSIGSVKTNMGHLEGASGIAGLIKAMLSVEKGTIAPNLWFERGNPAI…
Alternaria_hordeiaustralica_BMP_2776_GCA_023758085.1	g7006	KS-AT-DH-MT-ER-KR-xCP	MPLYYTDTTPTNGIPDMNGVPSDAPPQPKSDDMSNAIAIVGISCKFGGSASNLDGLWHTLSSGESCWSPVPKSRFDISKTSHPDSQRTDSLHVKGGFFIEDDLTEFDAPFFNLTAEVAKSMDPQLRLMLEGVYNATESAGLPIEKLSGSNTSVYSATFGRDYAEMLMKDADSMPTSLVTGNGPAMFANRVSHFYNLMGPSVTVDTGCSGGLVALHMGVNSIRNQESEVSIIGASNAILNQDFYIAISNLGLLHEDGKCYSMDHRFGGYGRGEGMAVLVLKKYSAAVRDGDHIHALIRESAVNQDGRTGTITSPSMDAQQQLIKQCYSRAGIDLSSTGYVEAHGTGTGGDAIEAEALALTFGNSREKFDPIWVGSVKSNIGHTEPVSGLAAVIKAALILR…
Alternaria_hordeiaustralica_BMP_2776_GCA_023758085.1	g5894	KS-AT-DH-MT-KR-xCP-C-A-xCP-Red	MTAHRDTSHGNGEPIAVVGSGMRFPGSSNNSSKLWELLLNPRDLLKRIPEDRFNIDNFYHPDPNHHATTDVRESYFLEEDHRHFDAGFFNIKPVEVAAIDPQQRLLMEVVYESLEAAGIPLESLIGSRTGVYVGLMCADYHDHLHKDVDTLPTYAPTGTARSIMSNRISYFFDWHGPCMTIDTACSSSLVAVHQAVQLLRSGDSDVAVAAGVNMILGSGQYIAESSLHMLSADSRSRMWDADASGYARGEGVASVIMKRLSTALADGDKIECIIRESGVNQDGRTKGITMPSASAQMDLIEQTYKKAGLDPKDPNQRCQYFEAHGTGTAAGDPKEAEAISKAFFHPGDSTSHKGDPLYVGSIKTVIGHTEGTAGLAGLLKASLAVQHGVIPPNLLFNKL…
Alternaria_hordeiaustralica_BMP_2776_GCA_023758085.1	g5288	SAT-KS-AT-DH-xCP-xCP-MT	MRTQSDHFAPSVAFFCPQSKAPTEAYLEQLQKYIVETPLLLPFAEAITSLTDTWTILCDGHPDIAKLKSGKRHVVSLKRWITDGISGPVSSSMSGILALPLLVVIQICQYFQLLELHGLTHERMLASLKKGGGAQGYCGGLPTAFAVSCAKDEEEVVHLATKALRLAFAVGAFGELGDDELVEGATTIAVRLRTPPQGDELVAGIPRCYISAITDPKTISIVGPVLELEKVAERARNRGLLVTDIHIRGKVHNPENAPLVKVLFDICQEHDDMMLPDASQLRVPVRSNLDGSLLHDCSLTHEAINTILASRCEWYRLLKDVAQDLAGSGTDAHTFALFGIGDPVPLMPFHNARLRISKMEVHTTVQGARLAEYKYPEDAIAITGVSCRLPRAADLEELW…
Alternaria_hordeiaustralica_BMP_2776_GCA_023758085.1	g868	SAT-KS-AT-PT-xCP-xCP-Te	MNVLIFGDQTADQYPLLRKACTWKNNSTLTSFLDRVSQVVREEVQKLPRTQRDQIPNFLTTWDLIEAYYAKGLKVPQLESCMVTIAQLSHYIGYYAENPSDLKNPANTRVVGLCTGLLAGSVVASARSLSELLPLAIEAVRIAFRTGTVVGAAKEALEQTPIPKETWSTIVTSISEKAAKDAITAFHQEQRIPTLAQAYISAVSTMALTISGPPSTTKRLLQSDAFKSCTRVSIPVYAPYHAAHLYTEADIDQILDKDATRHLQQFRPLSLVHSASTGECHTATSTLDLIRTALSEILVESVRWDNLLSEVVSQVTATSSQDCSVSAIGVTSITNSLVSALKSGGQSSVTARDHTSWVAAEHDSRGRTQNDKIAIVGMSGRFPGAANPDALWDLLEKGL…
Alternaria_incomplexa_BMP_0042_GCA_024043165.1	g5604	KS-AT-DH-ER-KR-xCP	MNTPADTEQPSMAPSSQPSGAEPIAIVGFGFKFPQDITDAQSLWKLLMERRSTMTEIPKNRWNIDGFYKEHGHRPGTVKNRGGHFLADDPARFDAPFFSIQPAEAECMDPQQRLLLETSYHALENAGIPMQAAIGTRTSVHVGCLLQEYSQISQRDAQMPGDYRIVGSSGLAMLANRLSWFYDFSGPSMTVDTACSGGLVALHLACQELLAGSVDMSLVGGNNLCLLPDSTALLSSLNMMSKDSVCYSFDERASGYARGEGFGVLILKRLDKAIADGDTIRGVIRSTGCGQDGNTPSITSPSQSAQERLIRETYARAGLDLGDTRYFEAHGTGTPVGDPCEAAAINNVFSSRTPEDPIFVGALKGNMGHPEGASGIAGVIKSLLVLEKGIIPPNVYPER…
Alternaria_incomplexa_BMP_0042_GCA_024043165.1	g6728	KS-AT-DH-ER-KR-xCP	MVINDSGHEDYGLNQRVSAASTAPKPRRYTQEPIAVVGMGCRLPGDSNSPHALWDFLERGGIADNTPPQSRFRLDTHHDGSKKPKTMRSPGGMFLENIDPKKFDAAFFSTGKLDAIAMDPQQRQLLEVVYECLENAGIPLEKLDGEAIGCFVGSYGVDYADMQARDPDDRAPSVTIGVGRAILSNRISHFLNIHGPSMTIDTACSGSLVGVDVACRYLSSGEIDGALVAGANLYFNPEHNMDSGPMKGASSLSGRCHTFDKKADGYIKGEAINCVMLKRLCDAERDGDPIRAIIRGTSTNSDGKTPGIASPSSEAQAKATRAAYANAGISDLSATGYIEMHGTGTQAGDPQEVKGVASVFSSSRPENAPLIMGSIKSNVGHSEPAAGISGLMKAIMSVE…
Alternaria_incomplexa_BMP_0042_GCA_024043165.1	g7703	KS-AT-DH-KR-xCP	METPDSDQYSSSSFSPVPVHSSVTEAELGELGECNDVAVIGMACRVAGGNHSPEQLWESILAKRDASSEIPAMRWEPYRHRDVRNIKALDEATSRGYYLDALEDFDPSFFGISPKEAEQMDPQQRISLEVAWEALESAGIDPKKLSGTDTAVFMGVNSDDYGKLLLEDLPNIEPWLGIGTAYCGIPNRISYHLDLMGPSTAVDAACASSLVAIHHGRQAILLGESKMAITGGVNAICGPGLTRVLDKAGAISPDGSCLSFDDNAHGYGRGEGAAIVVLKRFRDAIRDGDNVIAILKGSAVAQDGKTNGIMAPNAKAQELVARQALKRANVNPATVEYVEAHATSTPLGDPTEVSAISAVYGVSRSKPVNVGSVKPNVGHLEAGAGAIGFIKAVLALNKA…
Alternaria_incomplexa_BMP_0042_GCA_024043165.1	g10255	KS-AT-DH-MT-ER-KR-xCP	MATIDKTTPIAIIGMNMKFPGDAVSASSFWELIMSARNVSKEIPADRFNIDAFYHPDPNRLDSLRIRHAHFMEEDPRSFDAPFFNMSYAEASVLDPQQRGLLEGAYRTFENAGIPMETLSRSPTSVYCASFSRDGETITGRDFSAQSRYHATANGSSMLSNRISHFFDLAGPSLTVDTACSSGLYALHLGAQSILAGESKMSLVCGANTFITPESQALALSNGGFLSVDGKSYSFDAKANGYARGEGFGFVLLKPLDAALRDGDVVRAVIRATGANQDGRTPSITQPSQQAQLDLLQDTYRVAGLDVADTDYVEAHGTGTPVGDPIEAAAVGQAFRDGRNADRPLYMGSVKANIGHLEGASGMAGVIKAVLALENAMIPPIAMFEKPNPAIDVADLQLA…
Alternaria_incomplexa_BMP_0042_GCA_024043165.1	g2960	KS-AT-DH-MT-ER-KR-xCP	MNKPIAIIGISFRGPGDARDPEAFYRMLVEGRSARTEIPKDRYNVDAFYHPDPERLGSIQQRHAHFLEQDFKVFDAPFFSITPKEAKAMDPTHRILLEATYEGFENAGLTLEQVSGTQTSCYIGTFTADFPNLQARDNEGPSIYHATGMSASLASNRLSWFYNLRGPSLTVDTACSSSLTAFHLACQSIRTGEAEMSVVGGANLMFGPDMSILLGAAKILSPEGKSKMWDADANGFARGEGFGVTILKPLDAAIRDGDNIRAVVLATAANEDGRTPGISLPNSEAQQELIRTAYRQAGVDPAETGYVEAHGTGTQAGDPLEARAILETIGSVENRSSDLYVGSVKTNIGHLEGAAGVAGIIKAALTVERGMILPNLWFEKLNPDIDLPENVKIASKLTP…
Alternaria_incomplexa_BMP_0042_GCA_024043165.1	g3558	KS-AT-DH-MT-ER-KR-xCP	MPLYYTDTTPTNGIPDMNGVPSDAPPQPKSDDLSNAIAIVGISCKFGGSASNLDGLWHTLSSGESCWSPVPKSRFDISKTSHPDSQRTDSLHVKGGFFIEDDLTEFDAPFFNLTAEVAKSMDPQLRLMLEGVYNATESAGLPIEKLSGSNTSVYSATFGRDYAEMLMKDADSMPTSLVTGNGPAMFANRVSHFYNLMGPSITVDTGCSGGLVALHMGVNSIRNQESEVSIIGASNAILNQDFYIAISNLGLLHEDGKCYSMDHRFGGYGRGEGMAVLVLKKYSAAARDGDHIHALIRESAVNQDGRTGTITSPSMEAQQQLIKQCYSRAGIDLSSTGYVEAHGTGTGGDAIEAEALALTFGNSREKFDPIWVGSVKSNIGHTEPVSGLAAVIKAALILR…
Alternaria_incomplexa_BMP_0042_GCA_024043165.1	g4892	KS-AT-DH-MT-ER-KR-xCP	MEPIAIVGLSYKLPEGDNEDHSFWDNLQRGRSLSRPWPKSRGNIDAFYSSNVAMDNTVYSTNAHFVKEDPAAFDAAFFSITSKEAASMDPQQRWLLETSYKALENAGIPPETLAGSQTAVFAASMSDDYSRILARDPDEAPTNTATGTSPSILANRLSWYFDFKGPSIQLNTACSTSMIAMDLACQSLRSGQSSMALVAGANVLLSVEISLYLSNMQMLSPDGVSYSFDHRANGYARGEGAVVLVLKRLSDAIRDSDVIRAVVRATGSNQDGRTPGITQPSAESQEQLIRHVYKSCNLGFESTRYIEAHGTGTQLGDATEMKAIGRTFRASRSQKHPLYVGSVKSNIGHLEGCSGLAGILKSIMILEMGVIPPSALFEKISPKINAKIYNVEVPTKCIA…
Alternaria_incomplexa_BMP_0042_GCA_024043165.1	g6833	KS-AT-DH-MT-ER-KR-xCP	MAYEDTKPMPIAIVGFGCRFPGDVTNGEKLWQMLVEKKSARTEVPPDRFNVDAFHNPDGDRFGTCNNRGGHYLAEDVSLFDAPFFSISPAEAMAMDPMQRLLLEVTYEALENSGTPLARVSGSQTSCYVGCFTKDYEEMQRRDMELAPKYQSTGASQTMLSNRLSYFFNLKGPSVSIDTACSSGLVAVHLACQSLRSGESSMAIAGGSNLILSPDIQIEMSDMHFLSPDSISHAFDDRANGYARGEGVGAIILKPLDLAIRDNDPIRAIIRGTAASSDGRTPGITMPSKDAQIDLIRSAYRAAGIDVSETGYFEAHGTGTAAGDPIESGAIGEVFATSRPHRISATTEEVVPLSIGSVKTNMGHLEGASGIAGLIKALLSVEKGMIAPNLWFERGNPAI…
Alternaria_incomplexa_BMP_0042_GCA_024043165.1	g8327	KS-AT-DH-MT-KR-xCP-C-A-xCP-Red	MTAHRETSHGNGEPIAVIGSGMRFPGSSNNSSKLWELLLNPRDLLKRIPEDRFNIDNFYHPDPNHHATTDVRESYFLEEDHRHFDAGFFNIKPVEVAAIDPQQRLLMEVVYESLEAAGIPLESLIGSRTGVYVGLMCADYHDHLHKDVDTLPTYAPTGTARSIMSNRISYFFDWHGPCMTIDTACSSSLVAVHQAVQLLRSGDSDVAVAAGVNMILGSGQYIAESSLHMLSADSRSRMWDADASGYARGEGVASVILKRLSTALADGDKIECIIRESGVNQDGRTKGITMPSASAQMDLIEQTYKKAGLDPKDPNQRCQYFEAHGTGTAAGDPKEAEAISKAFFHPGDSTSYKGDPLYVGSIKTVIGHTEGTAGLAGLLKASLAVQHGVIPPNLLFNKL…
Alternaria_incomplexa_BMP_0042_GCA_024043165.1	g4050	SAT-KS-AT-DH-xCP-xCP-MT	MRSQSDHFAPSVAFFCPQSKAPTEAYLEQLQKYIVETPLLLPFAEAITSLTDTWTILCDGHPDIAKLKSGKRHVVSLKRWITDGISGPVSSSMSGILALPLLVVIQICQYFQLLKLHGLTHERMLASLKKGGGAQGYCGGLPTAFAVSCAKDEEEVVHLATKALRLAFAVGAFGELGDDELVEGATTIAVRLRTPPQGDELVAGIPRCYISAITDPKTISIVGPVLELEKVAERARNRGLLVTDIHIRGKVHNPENAPLVKVLFDICREHDDMMLPDASQLRVPVRSNLDGSLLHDCSLTHEAINTILASRCEWYRLLKDVAQDLAGSGTDAHTFALFGIGDPVPLMPFHNARLRISKMEVHTTVQGARLAEYKYPEDAIAITGVSCRLPRAADLEELW…
Alternaria_incomplexa_BMP_0042_GCA_024043165.1	g715	SAT-KS-AT-PT-xCP-xCP-Te	MNVLIFGDQTADQYPLLRKACTWKNNSTLTSFLDRVSQVVREEVQKLPRTQRDQIPNFLTTWDLIEAYYAKGLKVPQLESCMVTIAQLSHYIGYYAENPSDLKNPANTRVVGLCTGLLAGSVVASARSLSELLPLAIEAVRIAFRTGTVVGAAKEALEQTPVPKETWSTIVTSISEKAAKDAITAFHQEQRIPTLAQAYISAVSTMALTISGPPSTTKRLLQSDAFKGCTRVSIPVYAPYHAAHLYTEADIDQILDKDATRHLQQFRPLSLVHSASTGECHTATSTLDLIRTALTEILVESVRWDNLLSEVVSQVTATSSQDCSVSAIGVTSITNSLVSALKSGGQSSVTARDHTSWVAAEHDSRGRTQNDKIAIVGMSGRFPGAANPDALWDLLEKGL…
Alternaria_longipes_CBS_540.94_GCA_019059555.1	g1589	KS-AT-DH-ER-KR-xCP	MNDFIDLEGTFMPASSPNGLVPIAIVGFGFKFPQDITNAESLWKLLMERRSTMTEIPQNRWNIEGFYKEHGHRPGTVKNRGGHFLADDPARFDAPFFSVQPAEAECMDPQQRLLLETSYHALENAGIPMKAAMGTRTSVHVGCLLQEYSQISQRDSQMPGDYRIVGSSGLAMLANRLSWFYDFSGPSMTVDTACSGGLVAFHLACQELSAGSVDMSLVCGNNLCLLPDSTALLSSLNMMSKDSVCYSFDERASGYARGEGFGVLILKRLDTAIADGDTIRGVVRSTGCGQDGNTPSITSPSQSAQERLIRETYARAGLDLGDTRYFEAHGTGTPVGDPCEAAAISNVFSCRTPEDPIFVGALKSNMGHPEGASGIAGVIKTLLVLEKGIIPPNVYPERI…
Alternaria_longipes_CBS_540.94_GCA_019059555.1	g127	KS-AT-DH-KR-xCP	MSSHGMSDSCFKGFQCDDHHTDEVQLDPTSPSDIAIVGLSCRTAGGIDNPDTLWDFLLQKKHASGEIPPNRWEPWRRRSAHDAQIVGSITRKGYFLNDVESFDAAFFGISPREAEHMDPHQRLGLELAYEALQKAGIQTDRLAGSDTAVYIGVDSDDYSRTVMDDLPAIEAWSGIGTAHHGVSNRISYHFDLRGPSTAVDAACASSLVALHLARQAIMLGESTVAICGGVNVICAPGITHMLQKAGALTTEGVCRSFDAAASGYARGEGGAIIVLKRLSAAQEDNDNILAVLKSSASAQDGKTKGIMAPNGAAQADVARQALRRAGDIDPHTVSYVEAHATSTPLGDPAEIKAMAEVYGAGRSRKDPCYLGSIKPNVGHLEAAAGAISVVKTVLSVQKG…
Alternaria_longipes_CBS_540.94_GCA_019059555.1	g8997	KS-AT-DH-KR-xCP	MSSHEMLDPCFKGFQCDDHHTNEVQLDPTSPSDIAIVGLSCRTAGGIDNPDTLWDFLLQKKHASGEIPPNRWEPWRRRSAHDAQVVGSITRKGYFLDDVEGFDAAFFGISPREAQHMDPHQRLGLELAYEALQNAGIQTDRLAGSDTAVYIGRLGAVSAQHTMASRTGSHITLTWGPSAAVDAACASSLVALHLARQAIMSGESTVAICGGVNVICAPGITHMLQKAGALTTEGVCRSFDAAASGYARGEGGAIIVLKRLSAAQEDNDNVLAVLKSSASAQDGKTKGIMAPNGAAQADVARQALRRAGDIDPHTVSYVEAHATSTPLGDPTEIKAMAEVYGAGRSRKDPCYLGSIKPNVGHLEAAAGAISVVKTVLSVQKGVIAPQALLETLNTHIDWE…
Alternaria_longipes_CBS_540.94_GCA_019059555.1	g1217	KS-AT-DH-MT-ER-KR-xCP	MPYQSTNGTNGVNGFHDSNGGDNVHGTNGHRSGDVQSTNSDDMSNSIAIVGISCKFGGAASNLDGLWHTLANGESCWSPIPKSRFDVSNTYHPDPLRTDSLHVKGGFFIDEDLTEFDAPFFNLTAEAAKAMDPQLRLLLEGVYQATEDAGIPTEKLSGSNTSVFSASFGRDYTEMLMKDADALPTSLVTGNGPAMFANRVSHFYNLRGPSVTVDTGCSGGLVALHMGVNSIRNQESDVSIVGASNAILNQDFFIAISNLGLLHEDGKCYSMDHRWGGYGRGEGMAVLVLKKFSAAVKDGDHIHAVIRESAVNQDGRTGTITSPSMDAQRSLIQQCYSRAGIDLASTGYVEAHLTGTGGDAIEAEALARTFGKSREACDPVWVGSVKSNIGHTEPVSGLA…
Alternaria_longipes_CBS_540.94_GCA_019059555.1	g3778	KS-AT-DH-MT-ER-KR-xCP	MATDRTTPIAIIGMNMKFPGDAVSAQAFWELLMSARNVSKKIPSDRFNIDAFYHPDPNRLDSLRIRHAHFMEEDPRSFDAPFFNMSYAEASVLDPQQRGLLEGAYRTFENAGIPMETLSRSPTSVYCASFSRDGETITGRDFAAQSRYHATANGSSMLSNRVSHFFDLAGPSLTVDTACSSGLYALHLGVQSILAGESAMSLVCGANTFITPESQALALSNGGFLSVDGKSYSFDEKANGYARGEGFGFVLLKPLEAAIRDKDVIRAVIRATGANQDGRTPSITQPSQQAQLDLLRDTYRVAGLDVADTDYVEAHGTGTPVGDPIEAAAIGEAFRDGRKSDRPLYVGSVKSNIGHLEGASGMAGVIKAVLALEKAVIPPIAMFEKTNPAIDTEYLQLAF…
Alternaria_longipes_CBS_540.94_GCA_019059555.1	g4617	KS-AT-DH-MT-ER-KR-xCP	MAPVAINPNGQVDGHSEASDRGGHAGASGVQGVFEPIAICGMACRLPGGVSSPSQLWDFLVAGRDGRCRVPKSRFNLAGHYSDAKRPGTVGVEYGYFLDESVDLAGVDTTFTAMGRSELELLDPQQRLLLEVVREALHDAGTTGVAGSATGVYIGSFGEDWHDILRREDLQSSLYAVGGSQDYMVSARVSHELDLRGPNMTIRTACSSSMIALNEACAAIAKGDCESAVVAGSNLILTPNLFSALSGQGVLSADGSSRSLSADANGYARGEGIVAVYVKSLRAALRDGNPVRSVIAACAANSDGRTMPSSMPSAQAQATLIRHAYALAGVQDVGRTGLFECHATGTATGDPIECAAVADVFGHVGVHIGTVKPNMGHSEAASGLTAILKATLALEHAVI…
Alternaria_longipes_CBS_540.94_GCA_019059555.1	g6257	KS-AT-DH-MT-ER-KR-xCP	MNKPVAIIGIAFRGPGDARDPEAFYRMLVEGRNARTKIPKDRYNVDAFYHPDAERLGSIQQRRAHFLQQDFKVFDAPFFSITPKEAKAMDPTHRILLEATYEGFENAGLSLEKVSGTQTSCYIGTFTADFPNLQARDNEGPSMYHATGMSASLASNRLSWFYNLRGPSLTVDTACSSSLTAFHLACQSIRTGEAEMSVVGGANLMFGPDMSILLGAAKILSPEGKSKMWDANADGFARGEGFGVTILKPLDAALRDGDNIRAVVLATAANEDGHTPGISLPNSEAQQDLIRRAYQMASVDPAETGYVEAHGTGTQAGDPLEARAILKTVGSVEGRKSDLYVGSVKTNIGHLEGAAGVAGIIKAALTVERGMIPPNLWFEKLNPEIDLPENVKIASKLTP…
Alternaria_longipes_CBS_540.94_GCA_019059555.1	g9710	KS-AT-DH-MT-KR-xCP-C-A-xCP-Red	MSNLEPIAIVGSACRFPGDSDTPSKLWQLIKSPRDLLRQVPEERFDAEAFYHPDSKHHGTTNAIKSYFLDEDPALFDNGFFNIPQSEAEAVDPQQRLLMETVYDSLCAAGQTIEELRGSSTAVYVGLMCDDWAGILAQDPDVLPQYGATGMARSIMSNRISYFFDWHGPSMTIDTACSSSLVAVHQAIQTLRSGESQVAIAAGANLILTPGMYIAESKLSMLSPSGRSRMWDKDVDGYARGEGIAAVVLKPLSAAIRDNDHIECLIRGTGVNQDGRTNGITMPSATAQADLIRDTYARAGLDVNKPEDRPQFFHAHGTGTAAGDPQEAEAISKAFYSTNDCDETLYVGSIKTVIGHTEGTAGLASLISTSLALQHKVIPPNMHFNTLNPRLKPFYDHLE…
Alternaria_longipes_CBS_540.94_GCA_019059555.1	g5432	KS-AT-DH-xCP-xCP-MT-A-xCP-C	MRSQSSHFAPSVAFFCPQSKAPTEAYLEQLQRYIVETPLLQPFAEAITSLRDTWNTLCKGHADIANLKSGERHVVSLERWITNGIAGPVSSSMSGILALPLLVVIQICQYFQLLELHKLTHEQMLSSLRNGGGAQGYYGGLPTAFVISCAKDEEDVVRLATKALRLAFAVGAFGELGDDESIEGATTIAVRLRASQQGEELVEGIPGCYISAITDPRTISIVGPVIELMKVADRARDQGLLVTDIHIRGKVHNPENAPLVKVLFDLCQEHDEMTLPDASQLRVPVRSNLNGKLLDNCSLTYEAINTILASRCEWYRLLKEVAQDLAGSGTDSHIFALFGIGDPVPLMPFHNARLRVAKVEAHTAIQEARLAEYKYPEDAIAVTGVSCRLPRANDLEELW…
Alternaria_longipes_CBS_540.94_GCA_019059555.1	g7835	SAT-KS-AT-PT-xCP	MIQAKVLYFSGEIPQGDPEGDQRDLFRKLHLLSKERSYPILALFLETITQAVKEEQRRLIRTDRDLIPIFESILDLTDHVVELRKTSLGGAVERVLVLAFQLGSFIAYHEAHPFEYNFQPSDTFLIARGPGMLSAAAIALCPNVSMVPSIAGDIAKVAFRFGLVVDQVCRSLEISPGEINAAGAWIYCVYGVDPSEAQGAVALFNAEKEYAETSVASVFNDDGKSVSIGGPPSTLKALFTECEFFKRTRNVPMKKVQGMWHTGKVYGMEHVQQVVPHIDEKHRLHLSLFSPVTGEPFEAANANELLEQVMEEMLTQRIRWDRTIQSVTERLKQVSPNSTQLIAIQPSQYVESLLAQWKGDIPTATHTAEDMMSAIMNLPLGSSPAKDAKSSKIAVVGMA…
Alternaria_longipes_CBS_540.94_GCA_019059555.1	g7536	SAT-KS-AT-PT-xCP-xCP-Te	MNVLIFGDQTTDQYPLLRKACTWKNNSTLTTFLDRVSQVVREEVQKLPRTQRDQIPNFLTTWDLIEAYYAKGLKIPQLESCMVTIAQLAHFIGYYAENPSDLQNPANTRVVGLCTGLLAGSVVASARSLSELLPLATEAVRIAFRTGTVVGAAKEAVEQASAPKETWSTIVTNMTEKAAKDAIAAFHEEQQTPTLAQAYISAVSTMALTISGPPATTKRLLQGDAFKGCARVAIPVYAPYHAAHFYSPADIDQILDKDAIRHLQQFRPLSLVHSATTGKCHTATSTLDLIRSALTEILVEPVRWDNLLTEVVSQVTATSSQDCSVSAIGVTTITNSLVSALRNGGQSSVTARDHTTWVAAEHDSRGRTQNDKIAIVGMSGRFPGAANPDALWDLLEKGL…
Alternaria_metachromatica_BMP_0045_GCA_023757995.1	g7165	KS-AT-DH-ER-KR-xCP	MVINDSGHEDYGLNQRASAVSAAPKPRRYTQEPIAVVGMGCRLPGDSNSPHALWDFLERGGIADNTPPQSRFRLDTHHDGSKKPKTMRSPGGMFLENIDPKKFDAAFFSTGKLDAIAMDPQQRQLLEVVYECLENAGIPLEKLDGEAIGCFVGSYGVDYADMQARDPDDRAPSVTIGVGRAILSNRISHFLNIHGPSMTIDTACSGSLVGVDVACRYLSSGEIDGALVAGANLYFNPEHNMDSGPMKGASSLSGRCHTFDRKADGYIKGEAINCVMLKRLCDAERDGDPIRAIIRGTSTNSDGKTPGIASPSSEAQAKATRAAYANAGISDLSATGYIEMHGTGTQAGDPQEVKGVASVFSSSRPENAPLIMGSIKSNVGHSEPAAGISGLMKAIMSVE…
Alternaria_metachromatica_BMP_0045_GCA_023757995.1	g9859	KS-AT-DH-ER-KR-xCP	MNTSTDTEQPTMASSSQPSGVEPIAIVGFGFKFPQDITDAQSLWKLLMERRSTMTEIPKNRWNIDGFYKEHGHRPGTVKNRGGHFLADDPARFDAPFFSIQPAEAECMDPQQRLLLETSYHALENAGIPMQAAIGTRTSVHVGCLLQEYSQISQRDAQMPGDYRIVGSSGLAMLANRLSWFYDFSGPSMTVDTACSGGLVALHLACQELLAGSVDMSLVGGNNLCLLPDSTALLSSLNMMSKDSVCYSFDERASGYARGEGFGVLILKRLDKAIADGDTIRGVIRSTGCGQDGNTPSITSPSQSAQERLIRETYARAGLDLGDTRYFEAHGTGTPVGDPCEAAAINNVFSSRTPEDPIFVGALKGNMGHPEGASGIAGVIKSLLVLEKGIIPPNVYPER…
Alternaria_metachromatica_BMP_0045_GCA_023757995.1	g7531	KS-AT-DH-KR-xCP	METPDSNQYSSSSFSPVQVHSSVTEAELGELGECNDVAVIGMACRVAGGNHSPEQLWESILAKRDASSEIPAMRWEPYRHRDVRNIKALDNTTSRGYYLDALEDFDPSFFGISPKEAEQMDPQQRISLEVAWEALESAGIDPKSLSGSDTAVFMGVNSDDYGKLLLEDLPNIEPWLGIGTAYCGIPNRISYHLNLMGPSTAVDAACASSLVAIHHGRQAILCGESRIAITGGVNAICGPGLTRVLDKAGAISPDGSCLSFDDNAHGYGRGEGAAVVVLKRFRDAIRDGDNVIALLKGSAVAQDGKTNGIMAPNAKAQELVARQALKQANVDPATVEYVEAHATSTPLGDPTEVSAISAVYGVSRSKPVNVGSVKPNVGHLEAGAGAIGFIKAVLALNKA…
Alternaria_metachromatica_BMP_0045_GCA_023757995.1	g1122	KS-AT-DH-MT-ER-KR-xCP	MNKPIAIIGISFRGPGDARDPEAFYRMLVEGRSARTEIPKDRYNVDAFYHPDPERLGSIQQRHAHFLEQDFKVFDAPFFSITPKEAKAMDPTHRILLEATYEGFENAGLTLEQVSGTQTSCYIGTFTADFPNLQARDNEGPSIYHATGMSASLASNRLSWFYNLRGPSLTVDTACSSSLTAFHLACQSIRTGEAEMSVVGGANLMFGPDMSILLGAAKILSPEGKSKMWDADANGFARGEGFGVTILKPLDAAIRDGDNIRAVVLATAANEDGRTPGISLPNSEAQQELIRTAYRQAGVDPAETGYVEAHGTGTQAGDPLEARAILKTIGSVENRASDLYVGSVKTNIGHLEGAAGVAGIIKAALTVERGMILPNLWFEKLNPDIDLPENVKIASKLTP…
Alternaria_metachromatica_BMP_0045_GCA_023757995.1	g2773	KS-AT-DH-MT-ER-KR-xCP	MARSEDPEPMAIVGMGCRWAGGVRNPTDLWELLLNKRSGYQDWAAPRFSAKGFYHPNPERPGTTAAKGGYVVTEDPRLFDPSFFGISGLEAETIDPSQRKLLEVVYEALESAGETWESVNGTRTGVYVADISYDNSYAQTRDWEYARAHATTGVCHNILSNRINYVFNLRGPSVTLDSACTSAMYGLHMAIQAIRDGDCDSAIVATANYIMDPSMQIAMDKLGALSGTSMSHAFDAAADGYARGEGFAAIYVKKPQQAMQDGNPIRALVRGSAIGANGRSSGITHPSGTAQEDIIRKAYQNAGNLSPSETPFLECHGTGTRVGDPLEVEAAGKVFGPGRSSSEEDRLLIGSVKTNLGHTEGAAALAGIFKVVLALEAGVIPPSIGVTTLNPRIDFDKAK…
Alternaria_metachromatica_BMP_0045_GCA_023757995.1	g4540	KS-AT-DH-MT-ER-KR-xCP	MATTDKTTPIAIIGMNMKFPGDAVSASSFWELIMNARNVSKEIPADRFNIDAFYHPDPNRLDSLRIRHAHFMEEDPRSFDAPFFNMSYAEASVLDPQQRGLLEGAYRTFENAGIPMETLSRSPTSVYCASFSRDGETITGRDFSAQSRYHATANGSSMLSNRISHFFDLAGPSLTVDTACSSGLYALHLGTQSILAGESKMSLVCGANTFITPESQALALSNGGFLSVDGKSYSFDAKANGYARGEGFGFVLLKPLDAALRDGDVVRAVIRATGANQDGRTPSITQPSQQAQLDLLRDTYGVAGLDVADTDYVEAHGTGTPVGDPIEAAAVGQAFRDGRNADRPLYMGSVKANIGHLEGASGMAGVIKAVLALENAVIPPIAMFEKPNPAIDVSGLQLA…
Alternaria_metachromatica_BMP_0045_GCA_023757995.1	g5876	KS-AT-DH-MT-ER-KR-xCP	MEPIAIVGLSYKLPEGDNEDHSFWDNLQRGRSLSRPWPKYRGNIDAFYSSNVAMDNTVYSTNAHFVKEDPAAFDAAFFSITSKEAASMDPQQRWLLETSYKALENAGIPPETLAGSQTAVFAASMSDDYSRILARDPDEAPTNTATGTSPSILANRLSWYFDFKGPSIQLNTACSTSMIAMDLACHSLRSGQSSMALLAGANVLLSVEISLYLSNMQMLSPDGVSYSFDHRANGYARGEGAVVLVLKRLSDAIRDSDVIRAVVRATGSNQDGRTPGITQPSAESQEQLIRHVYKSCNLGFESTRYVEAHGTGTQLGDATEMKAIGRAFRASRSQKHPLYVGSVKSNIGHLEGCSGLAGILKSIMILEMGVIPPSALFEKISPKINAKIYNVEVPTKCIP…
Alternaria_metachromatica_BMP_0045_GCA_023757995.1	g8524	KS-AT-DH-MT-ER-KR-xCP	MPLYYTDTTPTNGIPDMNGVPSDAPPQPKSDDLSNAIAIVGISCKFGGSASNLDGLWHTLSSGESCWSPVPKSRFDISKTSHPDSQRTDSLHVKGGFFIEDDLTEFDAPFFNLTAEVAKSMDPQLRLMLEGVYNATESAGLPIEKLSGSNTSVYSATFGRDYAEMLMKDADSMPTSLVTGNGPAMFANRVSHFYNLMGPSVTVDTGCSGGLVALHMGVNSIRNQESEVSIIGASNAILNQDFYIAISNLGLLHEDGKCYSMDHRFGGYGRGEGMAVLVLKKYSAAVRDGDHIHALIRESAVNQDGRTGTITSPSMDAQQQLIKQCYSRAGIDLSSTGYVEAHGTGTGGDAIEAEALALTFGNSREKFDPIWVGSVKSNIGHTEPVSGLAAVIKAALILR…
Alternaria_metachromatica_BMP_0045_GCA_023757995.1	g9125	KS-AT-DH-MT-ER-KR-xCP	MAYEDTKPMPIAIVGFGCRFPGDVTNGEKLWQMLVEKKSARTEVPPDRFNVDAFYNPDGDRFGTCNNRGGHYLAEDVSLFDAPFFSISPAEAMAMDPMQRLLLEVTYEALENSGTPLARVSGSQTSCYVGCFTKDYEEMQRRDMELAPKYQSTGASQTMLSNRLSYFFNLKGPSVSIDTACSSGLVAVHLACQSLRAGESSMAIAGGSNLILSPDIQIEMSDMHFLSPDSISHAFDARANGYARGEGVGAIILKPLDLAIRDNDPIRAIIRGTAASSDGRTPGITMPSKDAQVDLIRSAYRAAGIDVSETGYFEAHGTGTAAGDPIESGAIGEVFATSRPHRISATTEEVVPLSIGSVKTNMGHLEGASGIAGLIKAMLSVEKGMIAPNLWFERGNPAI…
Alternaria_metachromatica_BMP_0045_GCA_023757995.1	g1828	KS-AT-DH-MT-KR-xCP-C-A-xCP-Red	MTAHRETSHGNGEPIAVVGSGMRFPGSSNNSSKLWELLLNPRDLLKRIPEDRFNIDNFYHPDPNHHATTDVRESYFLEEDHRHFDAGFFNIKPVEVAAIDPQQRLLMEVVYESLEAAGMPLESMIGSRTGVYVGLMCADYHDHLHKDVDTLPTYAPTGTARSIMSNRISYFFDWHGPCMTIDTACSSSLVAVHQAVQLLRSGDSDVAVAAGVNMILGSGQYIAESSLHMLSADSRSRMWDADASGYARGEGVASVILKRLSTALADGDKIECIIRESGVNQDGRTKGITMPSASAQMDLIEQTYKKAGLDPKDPNQRCQYFEAHGTGTAAGDPKEAEAISKAFFHPGDSTSHKGDPLYVGSIKTVIGHTEGTAGLAGLLKASLAVQHGVIPPNLLFNKL…
Alternaria_metachromatica_BMP_0045_GCA_023757995.1	g7394	SAT-KS-AT-DH-xCP-MT	MASAHVLPSMLIFGPQAELPSDAVMANLRDDLVNNRSLSTLVAAIEDLQQFWTALVDFDPRLNDAQGGKTLNELQYWLHSGQLPDRNRDLPNLLTVPMTVILQITQYARYIAGLELKHPHVHILAELKEAGVQGFCIGFLSAIIIAAARNEAEIGVIAATMLRLAVCIGAYVDKNVGYGESSSPSACIAVRWKDDSVRGREEVDVIVQQFKEAYISSINDQASVTVTAKHSDIADLRDSCRSRGLRVSTLCVNGRFHTGVHLPAVEHISAFAKDRDDMQLPSTDRLHLPVRSTVDGTVIREGALIRHILENTLSEQVNWYAAVQAAAAPLKEDTAPVVVFVGTGSHVPASLLPDPRFQTISLGATIANKAASTPHVASPLANVNAQSEYPPNSIAIVGM…
Alternaria_metachromatica_BMP_0045_GCA_023757995.1	g89	SAT-KS-AT-DH-xCP-xCP-MT	MRSQSDHFAPSVAFFCPQSKAPTEAYLEQLQKYIVETPLLLPFAEAITSLTDTWTILCDGHPDIAKLKSGKRHVVSLKRWITDGISGPVSSSMSGILALPLLVVIQICQYFQLLELHGLTHERMLASLKKGGGAQGYCGGLPTAFAVSCAKDEEEVVHLATKALRLAFAVGAFGELGDDELVEGATTIAVRLRTPPQGDELVAGIPRCYISAITDPKTISIVGPVLELEKVAERARNRGLLVTDIHIRGKVHNPENAPLVKVLFDICQEHDGMMLPDASQLRVPVRSNLDGSLLHDCSLTHEAINTILASRCEWYRLLKDVAQDLAGSGTDAHTFALFGIGDPVPLMPFHNARLRISKMEVHTTVQGARLAEYKYPEDAIAITGVSCRLPRAADLEELW…
Alternaria_metachromatica_BMP_0045_GCA_023757995.1	g6453	SAT-KS-AT-PT-xCP-xCP-Te	MNVLIFGDQTADQYPLLRKACTWKNNSTLTSFLDRVSQVVREEVQKLPRTQRDQIPNFLTTWDLIEAYYAKGLKVPQLESCMVTIAQLSHYIGYYAENPSDLKNPANTRVVGLCTGLLAGSVVASARSLSELLPLAIEAVRIAFRTGTVVGAAKEALEQTPIPKETWSTIVTSISEKAAKDAITAFHQEQRIPTLAQAYISAVSTMALTISGPPSTTKRLLQSDAFKSCTRVSIPVYAPYHAAHLYTEADIDQILDKDATRHLQQFRPLSLVHSASTGECHTATSTLDLIRTALSEILVESVRWDNLLSEVVSQVTATSSQDCSVSAIGVTSITNSLVSALKSGGQSSVTARDHTSWVAAEHDSRGRTQNDKIAIVGMSGRFPGAANPDALWDLLEKGL…
Alternaria_oregonensis_DAOMC238619_GCA_040583965.1	g484	KS-AT-DH-ER-KR-xCP	MNTPADTEQPSMAPSSQPSGAEPIAIVGFGFKFPQDITDAQSLWKLLMERRSTMTEIPKNRWNIDGFYKEHGHRPGTVKNRGGHFLADDPARFDAPFFSIQPAEAECMDPQQRLLLETSYHALENAGIPMQAAIGTRTSVHVGCLLQEYSQISQRDAQMPGDYRIVGSSGLAMLANRLSWFYDFSGPSMTVDTACSGGLVALHLACQELLAGSVDMSLVGGNNLCLLPDSTALLSSLNMMSKDSVCYSFDERASGYARGEGFGVLILKRLDKAIADGDTIRGVIRSTGCGQDGNTPSITSPSQSAQERLIRETYARAGLDLGDTRYFEAHGTGTPVGDPCEAAAINNVFSSRTPEDPIFVGALKGNMGHPEGASGIAGVIKSLLVLEKGIIPPNVYPER…
Alternaria_oregonensis_DAOMC238619_GCA_040583965.1	g5249	KS-AT-DH-ER-KR-xCP	MVINDSGHEDYGLNQRVSAASTAPKPRRYTQEPIAVVGMGCRLPGDSNSPHALWDFLERGGIADNTPPQSRFRLDTHHDGSKKPKTMRSPGGMFLENIDPKKFDAAFFSTGKLDAIAMDPQQRQLLEVVYECLENAGIPLEKLDGEAIGCFVGSYGVDYADMQARDPDDRAPSVTIGVGRAILSNRISHFLNIHGPSMTIDTACSGSLVGVDVACRYLSSGEIDGALVAGANLYFNPEHNMDSGPMKGASSLSGRCHTFDKKADGYIKGEAINCVMLKRLCDAERDGDPVRAIIRGTSTNSDGKTPGIASPSSEAQAKATRAAYANAGISDLSATGYIEMHGTGTQAGDPQEVKGVASVFSSSRPENAPLIMGSIKSNVGHSEPAAGISGLMKAIMSVE…
Alternaria_oregonensis_DAOMC238619_GCA_040583965.1	g7282	KS-AT-DH-KR-xCP	METSDSDQYSSSSFSPVPVHSSVTEAELGELGECNDVAVIGMACRVAGGNHSPEQLWESILAKRDASSEIPAMRWEPYRHRDVRNIKALDETTSRGYYLDALEDFDPSFFGISPKEAEQMDPQQRISLEVAWEALESAGIDPKKLSGSDTAVFMGVNSDDYGKLLLEDLPNIEPWLGIGTAYCGIPNRISYHLDLRGPSTAVDAACASSLVAIHHGRQAILLGESKMAITGGVNAICGPGLTRVLEKAGAISPDGSCLSFDDNAHGYGRGEGAAVVVLKRFRDAIRDGDNVIALLKGSAVAQDGKTNGIMAPNAKSQELVARQALKQANVDPATVEYVEAHATSTPLGDPTEVSAISAVYGVSRSQPVDVGSVKPNVGHLEAGAGAIGFIKAVLALNKA…
Alternaria_oregonensis_DAOMC238619_GCA_040583965.1	g11203	KS-AT-DH-MT-ER-KR-xCP	MAYEDTKPMPIAIVGFGCRFPGDVTNGEKLWQMLVEKKSARTEVPPDRFNVDAFYNPDGDRFGTYNNRGGHYLAEDVSLFDAPFFSISPAEAMAMDPMQRLLLEVTYEALENSGTPLARVSGSQTSCYVGCFTKDYEEMQRRDMELAPKYQSTGASQTMLSNRLSYFFNLKGPSVSIDTACSSGLVAVHLACQSLRTGESSMAIAGGSNLILSPDIQIEMSDMHFLSPDSISHAFDDRANGYARGEGVGAIILKPLDLAIRDNDPIRAIIRGTAASSDGRTPGITMPSKDAQVDLIRSAYRAAGIDVSETGYFEAHGTGTAAGDPIESGAIGEVFATSRPHRISATTEEVVPLSIGSVKTNMGHLEGASGIAGLIKAVLSVEKGMIAPNLWFERGNPAI…
Alternaria_oregonensis_DAOMC238619_GCA_040583965.1	g5084	KS-AT-DH-MT-ER-KR-xCP	MATIDKTTPIAIIGMNMKFPGDAVSASSFWELIMSARNVSKEIPADRFNIDAFYHPDPNRLDSLRIRHAHFMEEDPRSFDAPFFNMSYAEASVLDPQQRGLLEGAYRTFENAGIPMETLSRSPTSVYCASFSRDGETITGRDFSAQSRYHATANGSSMLSNRISHFFDLAGPSLTVDTACSSGLYALHLGAQSILAGESKMSLVCGANTFITPESQALALSNGGFLSVDGKSYSFDAKANGYARGEGFGFVLLKPLDAALRDGDVVRAVIRATGANQDGRTPSITQPSQQAQLDLLQDTYRVAGLDVADTDYVEAHGTGTPVGDPIEAAAVGQAFRDGRNADRPLYMGSVKANIGHLEGASGMAGVIKAVLALENAMIPPIAMFEKPNPAIDVADLQLA…
Alternaria_oregonensis_DAOMC238619_GCA_040583965.1	g6112	KS-AT-DH-MT-ER-KR-xCP	MPLYYTDTTPTNGIPDMNGVPSDAPPQPKSDDLSNAIAIVGISCKFGGSASNLDGLWHTLSSGESCWSPVPKSRFDISKTSHPDSQRTDSLHVKGGFFIEDDLTEFDAPFFNLTAEVAKSMDPQLRIMLEGVYNATESAGIPIEKLSGSNTSVYSATFGRDYAEMLMKDADSMPTSLVTGNGPAMFANRVSHFYNLMGPSVTVDTGCSGGLVALHMGVNSIRNQESEVSIIGASNAILNQDFYIAISNLGLLHEDGKCYSMDHRFGGYGRGEGMAVLVLKKYSAAVRDGDHIHALIRESAVNQDGRTGTITSPSMDAQQQLINQCYSRAGIDLSSTGYVEAHGTGTGGDAIEAEALALTFGNSREKFDPIWVGSVKSNIGHTEPVSGLAAVIKAALILR…
Alternaria_oregonensis_DAOMC238619_GCA_040583965.1	g8501	KS-AT-DH-MT-ER-KR-xCP	MNKPIAIIGISFRGPGDARDPEAFYQMLVEGRSARTEIPKDRYNVDAFYHPDPERLGSIQQRHAHFLEQDFKVFDAPFFSITPKEAKAMDPTHRILLEATYEGFENAGLTLEQVSGTQTSCYIGTFTADFPNLQARDNEGPSIYHATGMSASLASNRLSWFYNLRGPSLTVDTACSSSLTAFHLACQSIRTGEAEMSVVGGANLMFGPDMSILLGAAKILSPEGKSKMWDADANGFARGEGFGVTILKPLDAAIRDGDNIRAVVLATAANEDGRTPGISLPNSEAQQELIRTAYRQAGVDPAETGYVEAHGTGTQAGDPLEARAILKTIGSVENRASDLYVGSVKTNIGHLEGAAGVAGIIKAALTVERGMILPNLWFEKLNPDIDLPENVKIASKLTP…
Alternaria_oregonensis_DAOMC238619_GCA_040583965.1	g8643	KS-AT-DH-MT-ER-KR-xCP	MEPIAIVGLSYKLPEGHNEDHSFWDNLQRGRSLSRPWPKSRGNIDAFYNSNVAMDNTVYSTNAHFVKEDPAAFDAAFFSITSKEAASMDPQQRWLLETSYKALENAGIPPETLAGSQTAVFAASMSDDYSRILARDPDEAPTNTATGTSPSILANRLSWYFDFKGPSIQLNTACSTSMIAMDLACHSLRSGQSSMALLAGANVLLSVEISLYLSNMQMLSPDGVSYSFDHRANGYARGEGAVVLVLKRLSDAIRDSDVIRAVVRATGSNQDGRTPGITQPSAESQEQLIRHVYKSCNLGFESTRYVEAHGTGTQLGDATEMKAIGRAFRASRSQKHPLYVGSVKSNIGHLEGCSGLAGILKSIMILEMGVIPPSALFEKISPKINAKIYNVEVPTKCIP…
Alternaria_oregonensis_DAOMC238619_GCA_040583965.1	g9624	KS-AT-DH-MT-KR-xCP-C-A-xCP-Red	MTAHRETSHGNGEPIAVIGSGMRFPGSSNNSSKLWELLLNPRDLLKRIPEDRFNIDNFYHPDPNHHATTDVRESYFLEEDHRHFDAGFFNIKPVEVAAIDPQQRLLMEVVYESLEAAGIPLESLIGSRTGVYVGLMCADYHDHLHKDVDTLPTYAPTGTARSIMSNRISYFFDWHGPCMTIDTACSSSLVAVHQAVQLLRSGDSDVAVAAGVNMILGSGQYIAESSLHMLSADSRSRMWDADASGYARGEGVASVILKRLSTALADGDKIECIIRESGVNQDGRTKGITMPSASAQMDLIEQTYKKAGLDPKDPNQRCQYFEAHGTGTAAGDPKEAEAISKAFFHPGDSTSHKGDPLYVGSIKTVIGHTEGTAGLAGLLKASLAVQHGVIPPNLLFNKL…
Alternaria_oregonensis_DAOMC238619_GCA_040583965.1	g1869	SAT-KS-AT-DH-xCP-xCP-MT	MRSQSDHFAPSVAFFCPQSKAPTEAYLEQLQKYIVETPLLLPFAEAITSLTDTWTILCDGHPDIAKLKSGKRHVVSLKRWITDGISGPVSSSMSGILALPLLVVIQICQYFQLLELHGLTHERMLASLKKGGGAQGYCGGLPTAFAVSCAKDEEEVVHLATKALRLAFAVGAFGELGDDELVEGATTIAVRLRTPPQGDELVAGIPRCYISAITDPKTISIVGPVLELEKVAERARNRGLLVTDIHIRGKVHNPENAPLVKVLFDICREHDDMMLPDASQLRVPVRSNLDGSLLHDCSLTHEAINTILASRCEWYRLLKDVAQDLAGSGTDAHTFALFGIGDPVPLMPFHNARLRISKMEVHTTVQGARLAEYKYPEDAIAITGVSCRLPRAADLEELW…
Alternaria_oregonensis_DAOMC238619_GCA_040583965.1	g5762	SAT-KS-AT-PT-xCP-xCP-Te	MNVLIFGDQTADQYPLLRKACTWKNNSTLTSFLDRVSQVVREEVQKLPRTQRDQIPNFLTTWDLIEAYYAKGLKVPQLESCMVTIAQLSHYIGYYAENPSDLKNPANTRVVGLCTGLLAGSVVASARSLSELLPLAIEAVRIAFRTGTVVGAAKEALEQTPVPKETWSTIVTSISEKAAKDAITAFHQEQRIPTLAQAYISAVSTMALTISGPPSTTKRLLQGDAFKGCTRVSIPVYAPYHAAHLYTEADIDQILDKDATRHLQQFRPLSLVHSASTGECHTATSTLDLIRTALSEILVESVRWDNLLSEVVSQVTATSSQDCSVSAIGVTSITNSLVSALKSGGQSSVTARDHTSWVAAEHDSRGRTQNDKIAIVGMSGRFPGAANPDALWDLLEKGL…
Alternaria_panax_BNCC115425_GCA_019702505.1	g6729	KS-AT-DH-ER-KR-xCP	MDEPVGFKESPMSSSTRINSVEPVAIVGFGFKFPQDITDAESLWKLLMERRSTMTEIPKDRWNIDGFYKEHGHRPGTVKNRGGHFLADDPARFDAPFFSIQPAEAECMDPQQRLLLETSYHALENAGIPMQAAMGTRTSVHVGCLLQEYSQISQRDTQMPGDYRIVGSSGLAMLANRISWFYDFSGPSMTIDTACSGGLVAFHLACQELLAGSVDMSLVCGNNLCLLPDSTALLSSLNMMSKDSVCYSFDERASGYARGEGFGVLILKRLDKAIADGDTIRGVVRSTGCGQDGNTPSITSPSQSAQERLIRETYTRAGLDLGDTRYFEAHGTGTPVGDPCEAAAISNVFSSRTPEDPIFVGALKSNMGHPEGASGIAGVIKTLLVLENGIIPPNVYPER…
Alternaria_panax_BNCC115425_GCA_019702505.1	g6349	KS-AT-DH-MT-ER-KR-xCP	MSHQSMNSTNGINSVHDSNGINGIHEGNGVHDSNDHRSNGVQHTTSDDLSNSIAIVGISCKFGGAAANLDGLWRTLSQGESCWSPIPKSRFDVTNTYHPDPLRTDSLHVKGGFFIEEDLTEFDAPFFNLTADAAKAMDPQLRLLLEGVYQATEDAGIPTEKLSGSNTSVFSASFGRDYTDMLMKDADALPTSLVTGNGPAMFANRVSHFYNLRGPSVTVDTGCSGGLVALHMGVNSIRNQESDVSIVGASNAILNQDFFIAISNLGLLHEDGKCYSMDHRWGGYGRGEGMAVLVLKKFSAAVKDGDHIHAVIRESAVNQDGRTGTITSPSMDAQRSLIQQCYSRAGIDLSSTGYVEAHLTGTGGDAIEAEALARTFGKSREACDPVWVGSIKSNIGHTE…
Alternaria_panax_BNCC115425_GCA_019702505.1	g768	KS-AT-DH-MT-ER-KR-xCP	MATDKTTPIAIIGMNMKFPGDAVSAQSFWDLLMSARNVSKEIPSDRFNIDAFYHPDPNRLDSLRIRHAHFMEEDPRSFDAPFFNMSYAEASVLDPQQRGLLEGAYRTFENAGIPMETLSRSPTSVYCASFSRDGETITGRDFAAQSRYHATANGSSMLSNRVSHFFDLAGPSLTVDTACSSGLYALHLGAQSIVTGESAMSLVCGANTFITPESQALALSNGGFLSVDGKSYSFDEKANGYARGEGFGFVLLKPLDAAVRDGDVVRAVIRATGANQDGRTPSITQPSQQAQLDLLRDTYRVAGLDVANTDYVEAHGTGTPVGDPIEAGAIGEAFRDGRKSDRPLYVGSVKSNIGHLEGASGMAGVIKAVLALEKAVIPAIAMFEKTNPAIDAESLQLAF…
Alternaria_panax_BNCC115425_GCA_019702505.1	g9158	KS-AT-DH-MT-ER-KR-xCP	MDDKATDNEGNGDYDGSFDPIAIIGMSCRFSGMADTPDAFWQMLSKGMTSWSRDARNRFKLESFWHPKNDLAGSFNASGLHLLRQDPAAFDNDFFSISGLEAQAMDPQQRLMLEVAHETFENAGLTVKVLEKSQTGVYCASTYQDYDQILGRDPELSAKYRFTGTGASMLANRISYFFDLRGPSMTIDTACSSTLVAIHEACRALRMGDIDQALVGGANLILDPDKLMVQSSMQFLSQDGRCYSFDARASGYSRGEGVAGIMLKPLSAALRDGDPVRAIVRGTSVVSDGRTPGITMPSMDSQVEAITKAYEQAGLTLADTIYIEAHGTGTIIGDKAEALAFATTIGKDRTEKIIVGSVKSNLGHIENASGLASVIKTVLAIENGVIPPVPTFEKPSEQL…
Alternaria_panax_BNCC115425_GCA_019702505.1	g9267	KS-AT-DH-MT-ER-KR-xCP	MACEETQSMPIAIVGFGCRFPGDVTNGEKLWEMLVEKKSARTEVPPDRFNIDAFYNPDGDRFGTCNNRGGHYLTEDVSLFDAPFFSISPAEAMAMDPMQRLLLEVTYEALENSGTPLARISGSKTSCYVGCFTKDYEEMQRRDMELAPKYQSTGASQTMLSNRLSYFFNLKGPSVSVDTACSSGLVAVHLACQSLRTGESSMAIAGGSNLILSPDIQIEMSDMHFLSPDSISHAFDDRANGYARGEGVGAIILKPLDLALRDNDPIRAIIRGTAASSDGRTPGITMPSKDAQIDLIRSAYRAAGIDVSDTGYFEAHGTGTAAGDPIESGAIGEVFAASRPSRKTAATEEVVPLSIGSVKTNMGHLEGASGIAGLIKAILSVEKGVIAPNLWFERGNPAI…
Alternaria_panax_BNCC115425_GCA_019702505.1	g5445	KS-AT-DH-MT-ER-KR-xCP-KR	MAFSEVDQDRETPRTNGSVNGVVHHSTNGNLHSDGNNGHFNGFSASSESTAASSLLASQPPKTLAPIAICGMALRLPGGLESPQDLWEFLLAKGDARSRVPESRYNISAYHSDSGKPGTIATQYGYFLDDNVKLGSLDASRFSLSRAELEFSDPQQRRMLEVVREAFDDAGENSFKGRTIGCYMGSYGEDWLEMQNRDHQQSGVNRVDGYSDFMLSSRISYEMDLKGPCMTVRTACSAALIGLNEACQAIRNGLCEAAVIGGANLIMAPGMTAFMTEKGVLSPDGHCKTFSDDANGYARGESITAIFIKPLEAAIRDGNPVRAVLRSVVSNSDGRTQGIAQPSTESQEALMRKAYRDVGISDFSKTAFVECHGTGTPVGDPIETNAVARVFGDAGVYIG…
Alternaria_panax_BNCC115425_GCA_019702505.1	g10021	SAT-KS-AT-DH-xCP-MT	MAIHSTPSVAFFCPQSKAPTEAYLGQLQKYILDTPLLQPFAEAITSLRDTWSTLCEGHPDIAKLKSGERHVVSLERWITDGIAGPVSSSMSGILALPLLVVIQICQYFQLLELHGLTHEQMLSNLRNGGGAQGYCGGLPTAFAISCAEDEEDVVRLATKALRLAFAIGAFGELGDDESIEGATTIAVRLRASQQGDELIEGIAGCYISAITDPRTISIVGPVLELKKVAGRARDQGLLVTDIHIRGKVHNPENAPLVKVLFDLCQEHEEMALPRASQLRIPVRSNLNGKLLDDCSLTHEAINTILASRCEWYRLLKEVAQDLVGSGTDSHTFALFGIGDPVPLMPFHNARLRVSKVEAHTAIQEARLAEYKYPEDAIAITGVSCRLPRANDLEQLWQLL…
Alternaria_panax_BNCC115425_GCA_019702505.1	g5396	SAT-KS-AT-PT-xCP-xCP-Te	MNVLIFGDQTADQYPLLRKACTWKNNSTLTTFLDRVSQVVREEVQKLPRTQRDQIPNFLTTWDLIEAYYAKGLKVPQLESCMVTIAQMAHYIGYYAENPSDLQNPANTRVVGLCTGLLAGSVVASARSLSELLPLATEAVRIAFRTGTVVGAAKEAVEQTSVPKETWSTIVTNMTEQAAKDAIAAFHEEQRTPTLAQAYISAVSTMALTISGPPATTKRLLQGDAFKGCARVAIPVYAPYHAAHFYSDADIDQILDKDAIRHLQQFRPLSLVHSASTGKCHTATSTLDLIRTAITEILVEPVRWDNLLTEVVSQVTATSSQDCSVSAIGVTTITNSLVSALRNGGQSSVTARDHTSWVAAEHDSRGRTQNDKIAIVGMSGRFPSAANPDALWELLEKGL…
Alternaria_porri_na_GCA_029783965.1	g3867	KS-AT-DH-ER-KR-xCP	MNGFIDPEGTFMPASSPNVLVPIAIVGFGFKFPQDITNAESLWKLLMERRSTMTEIPQNRWNIDGFYKEHGHRPGTVKNRGGHFLADDPARFDAPFFSVQPAEAECMDPQQRLLLETSYHALENAGIPMKAAMGTRTSVHVGCLLQEYSQISQRDSQMPGDYRIVGSSGLAMLANRLSWFYDFSGPSMTVDTACSGGLVAFHLACQELSAGSVDMSLVCGNNLCLLPDSTALLSSLNMMSKDSVCYSFDERASGYARGEGFGVIILKRLDTAIADGDTIRGVVRSTGCGQDGNTPSITSPSQSAQERLIRETYARAGLDLGDTRYFEAHGTGTPVGDPCEAAAISNVFSCRTPEDPIFVGALKSNMGHPEGASGIAGVIKTLLVLEKGIIPPNVYPEHI…
Alternaria_porri_na_GCA_029783965.1	g10184	KS-AT-DH-MT-ER-KR-xCP	MEPIAIVGLAYKLPQDIEDEASFWRILEQGQSVMTEWPKSRVDANAFARSPEAALNTLNSTRGHFLEQNLASFDAPFFSISSKEASAMDPQQRMLLETSYHALENAGIPLSRIAGTETGVFVGTMESDYHRMISKDPDDAPMTTATGISVSIMANRLSWYFDLKGPSMQLNTACSSSMIAVDLGCQSIRSGQTSTVLVAGSSLMLDPEYSLYLSNMNMLSPDGICHSFDDRANGYSRGEGVIVMILKKLSTAILDGDNIRAVIRGTGSNQDGRTPGITQPSSVSQENLIRYTYRTCNLGFESTRYIEAHGTGTQIGDAMEMRALGAVFRTARSPKAPLFVGSVKTNIGHLEGGSGLAGIAKSILILEKGFIPPNALFERLNTKVNAKRHNIQVPGSCIR…
Alternaria_porri_na_GCA_029783965.1	g11046	KS-AT-DH-MT-ER-KR-xCP	MASSMKSEPIAIIGMSCRFPGGASEPARLWDVLSSGQSAWSEVPKDRFNMEAFHLEGDPHSSTTNTPGGHFLDSDVATFDCSFFEIKPTEARAMDPQQRLTLELAYEAFENAGFTVSQIWGSSTGVYIGQWSSDYSEIMARDPENQELYHTLGTGAAITSNRVSFFFNLRGPSFTVDTGCSASLVALHNAVQSLRSGESTMSLVGGVNVLLDPQRFTYQSKLKMFSPDGRSFSFDERANGYGRGEGCGCVVLKPLSLAIKDGNAIRAVIRNSALNQDGRTPQGISVPNGEAQEELIRRAYAEAGLVPAETDYVEAHGTGTAVGDPIEAKAIANVLARPREATQGPLIMGSVKGNIGHTESAAGIAGLIKSVLMLENQAVAPQVNYEKPNPKIPLHSWNL…
Alternaria_porri_na_GCA_029783965.1	g4237	KS-AT-DH-MT-ER-KR-xCP	MASKKISNSCTSLPLDHLSNFSEADNEDIHYTISMLYQSTNGTNGIDGFHDSNGDNNVHGTNGHRSGDDQSTNSDDMSNSIAIVGISCKFGGAASNLDGLWHTLANGESCWSPIPKSRFDVSNTYHPDPLRTNSLHVKGGFFIKEDLAEFDAPFFNLTAEAAKAMDPQLRLLLEGVYQATEDAGIPTEKLSGSNTSVFSASFGRDYTEMLMKDADALPTSLVTGNGPAMFANRVSHFYNLRGPSVTVDTGCSGGLVALHMGVNSIRNQESDVSIVGASNAILNQDFFIAISNLGLLHEDGKCYSMDHRWGGYGRGEGMAVLVLKKFSAAVKDGDHIHAVIRESAVNQDGRTGTITSPSMDAQRSLIQQCYSRAGIDLASTGYVEAHLTGTGGDAIEAEA…
Alternaria_porri_na_GCA_029783965.1	g4836	KS-AT-DH-MT-ER-KR-xCP	MNKPVAIIGIAFRGPGDARDPEAFYRMLVEGRHARTEIPKDRYNVDAFYHPDAERLGSIQQRHAHFLQQDFKVFDAPFFSITPKEAKAMDPTHRILLEATYEGFENAGLSLENISGTQTSCYIGTFTADFPNLQARDNEGPSIYHATGMSASLASNRLSWFYNLRGPSLTVDTACSSSLTAFHLACQSIRTGEAEMSVVGGANLMFGPDMSILLGAAKILSPEGKSKMWDANANGFARGEGFGVTILKPLDAALRDGDNIRAVVLATAANEDGHTPGISLPNSEAQQELIRSAYKMAGVDPAETGYVEAHGTGTQAGDPLEARAILKTVGSVEGRKSDLYVGSVKTNIGHLEGAAGVAGIIKAALTIERGMIPPNLWFEKLNPEIDLPENVKIATKLTP…
Alternaria_porri_na_GCA_029783965.1	g7233	KS-AT-DH-MT-ER-KR-xCP	MNTKRMTPIAIIGMNMKFPGDAVSAQAFWELLMSARNVSKEIPSDRFNIDAFYHPDPNRLDSLRIRHAHFMEEDPRSFDAPFFNMSYAEASVLDPQQRGLLEGAYRTFENAGIPMETLSRSPTSVYCASFSRDGETITGRDFAAQSRYHATANGSSMLSNRVSHFFDLAGPSLTVDTACSSGLYALHLGVQSILTGESAMSLVCGANTFITPESQALALSNGGFLSVDGKSYSFDGKANGYARGEGFGFVLLKPLEAAIRDKDVIRAVIRATGANQDGRTPSITQPSQQAQLDLLRDTYRVAGLDVADTDYVEAHGTGTPVGDPIEAAAIGEAFRDGRKSGRPLYVGSVKSNIGHLEGASGMAGVIKAVLALEKAVIPPIAMFEKTNPAIDTEYLQLAF…
Alternaria_porri_na_GCA_029783965.1	g8853	KS-AT-DH-xCP-xCP-MT	MAQNPDLNGIAIVGMGCKFPGADSIEEYWNLLDAGRSMVTEPPKGRFPSHEHGRSTDRSVFSGNYIDDIESFDNRFFKKSGREAASMDPQQRLLLEVAYQALESAGFFGPREQDLDVGCFVGVCASDYNDNVASHPANAFSTLGTLRAFLTGRVSHFFGLTGPSITYDTACSSSAVAIDAACKAIAHGDCTSALAGGVSLLTSPHFFQNLAAASFLSPTGPTKSFDARADGYCRGEGIGLVVLKKLSQAIHDGDHIFGTILATSVKQSSNKVPITVPYSPSHTALYRQVLRMAGVAAEDVTYLEAHGTGTPIGDVIEFDALRATFASKQRKQPLYVGSVKSNIGHTESTSGVASLIKTLLMMQKRQIPGQANYSTPNTKIDLSKGQFVIPTQTQYWAAD…
Alternaria_porri_na_GCA_029783965.1	g2230	SAT-KS-AT-PT-xCP	MIRAKVLYFSGEIPQGDPEGDQRDLFRKLHLLSKERSYPILALFLETITRAVREEQRRLIRTERDSIPAFESILDLTDHVVELRKTSLGGAIERVLVLSFQLGSFIAYHEAHPLEYNFQSSDTFLIARGPGMLSAAAITLCPNMSMVPSIAGHIAKVAFRFGLVVDQVCRSLEISPDEINAAGAWIYCVYGVDPSEAQEAVALFNAEKEYAETSVASVFNDDGKSVSIGGPPSTLKALFTECEFFKRTRNVPMKKVQGMWHTGKVYGMEHVQQIVPYIDEKYRLHLSLFSPVTGQPFKAASANELLEQIMEEMLTQRIRWDRTIQSITERLKQVSPNSTQLIAIQPSQYVESLLAQWKADIPTATHTSEDTMSAIMNLPLGSSPSKDAKSSKIAVVGMA…
Alternaria_porri_na_GCA_029783965.1	g2503	SAT-KS-AT-PT-xCP-xCP-Te	MNVLIFGDQTADQYPLLRKACTWKNNSTLTTFLDRVSQVVREEVQKLPRTQRDQIPNFLTTWDLVEAYYAKGLKIPQLESCMVTIAQLAHFIGYYAENPSDLQNPANTRVVGLCTGLLAGSVVASARSLSELLPLATEAVRIAFRTGTVVGAAKEAVEQASAPKETWSTIVTNMTEKAAKDAITAFHEEQQIPTLAQAYISAVSTMALTISGPPATTKRLLQGDAFKGCARVAIPVYAPYHAAHFYGSADIDQILDKDAIRHLQQFRPLSLVHSATTGKCHTATSTLDLIRSALTEILVEPVRWDNLLTEVVSQVTATASQDCSVSAIGVTTITNSLVSALRNGGQSSVTARDHTTWVAAEHDSRGRTQNDKIAIVGMSGRFPGAANPDALWDLLEKGL…
Alternaria_rosae_BMP_2777_GCA_024043135.1	g11444	KS-AT-DH-ER-KR-xCP	MNASADSEQPFMAPSSQPCSVEPIAIVGFGLKFPQDITDAQSLWKLLMERRSTMTEIPKNRWNIDGFYKEHGHRPGTVKNRGGHFLADDPARFDAPFFSIQPAEAECMDPQQRLLLETSYHALENAGIPMQAAIGTRTSVHVGCLLQEYSQISQRDAQMPGDYRIVGSSGLAMLANRLSWFYDFSGPSMTVDTACSGGLVALHLACQELLAGSVDMSLVGGNNLCLLPDSTALLSSLNMMSKDSVCYSFDERASGYARGEGFGVLILKRLDKAIADGDTIRGVIRSTGCGQDGNTPSITSPSQSAQERLIRETYARAGLDLGDTRYFEAHGTGTPVGDPCEAAAINNVFSSRTPEDPIFVGALKGNMGHPEGASGIAGVIKSLLVLEKGIIPPNVYPER…
Alternaria_rosae_BMP_2777_GCA_024043135.1	g6018	KS-AT-DH-ER-KR-xCP	MSNKEFKAEPIAIVGVGCRFSGSATNPEGLWDMLSKGTTGWTKTASHRFNLNAFWHPNGDNKGTFNTKGFHLLKQNPALFDNDFFGIGGLEAKAMDPQQRILLEVAYEAFENAGLSMDELRGSQTGVWCSVSNADYESILARDPDISPGYRMTGTGNAIVSNRISYLFDLRGPSMTIDTFCSSTLVGLDAAVKSIRAGTVKQAFVGGSNLCLDPERTGVLSSMSFTSPDGRCYAFDPRANGYGRGEGVAAVILKPLSAALADGDSIRAVIRGTGVSSDGKTNGITLPSDWGQKQALRMAYEDAGLRPQDTYFVEAHGTGTKAGDRTEATVWMDTFLRGRAKDLPLVIGSVKANLGHTEPTAGLAGLLKAILVLEQGIIPATPTHKSLSPDVADVLGDSL…
Alternaria_rosae_BMP_2777_GCA_024043135.1	g9598	KS-AT-DH-ER-KR-xCP	MVINDSGHEDYGLNQRTSAASTAPKPRRYTQEPIAVVGMGCRLPGDSNSPHALWDFLERGGIADNTPPQSRFRLDTHHDGSKKPKTMRSPGGMFLENIDPKKFDAAFFSTGKLDAIAMDPQQRQLLEVVYECLENAGIPLEKLDGEAIGCFVGSYGVDYADMQARDPDDRAPSVTIGVGRAILSNRISHFLNIHGPSMTIDTACSGSLVGVDVACRYLSSGEIDGALVAGANLYFNPEHNMDSGPMKGASSLSGRCHTFDKKADGYIKGEAINCVMLKRLCDAERDGDPIRAIIRGTSTNSDGKTPGIASPSSEAQAKATRAAYANAGITNLSATGYIEMHGTGTQAGDPQEVKGVASVFSSSRPENAPLIMGSIKSNVGHSEPAAGISGLMKAIMSVE…
Alternaria_rosae_BMP_2777_GCA_024043135.1	g5551	KS-AT-DH-KR-xCP	MESPDSNQCSSSSFNPVEMLSSVTEAEIRELTELDDVAVIGMACRVAGGNHSPEQLWESILAKRDASSEIPPMRWEPYRHRDVRNIKALDNTTSRGYYLDALEDFDPYFFGISPKEAEQMDPQQRVSLEVAWEALEHAGIDPKKLSGSDTAVFMGVNSNDYGKLLLEDLPNIEPWLGIGTAYCGIPNRISYHLNLMGPSTAVDAACASSLVAIHHGRQAILCGESKIAITGGVNALCGPGLTRVLDKAGAISPDGSCLSFDDNAHGYGRGEGAAVVVLKRLRDAIKDGDNIIALLKGSAVAQDGKTNGIMAPNAKAQELVARQALKQANVDPATVEYVEAHATSTPLGDPTEVSAISAVYGVSRSKPVNVGSVKPNVGHLEAGAGAIGFVKAVLALNKA…
Alternaria_rosae_BMP_2777_GCA_024043135.1	g11635	KS-AT-DH-MT-ER-KR-xCP	MNKPIAIIGMSFRGPGDARDPEAFYRMLVEGRSARTEIPKDRYNVDAFYHPDPERLGSIQQRHAHFLEQDFKVFDAPFFSITPKEAKAMDPTHRILLEATYEGFENAGLTLDQVSGTKTSCYIGTFTADFPNLQARDNEGPSIYHATGMSASLASNRLSWFYNLRGPSLTVDTACSSSLTGFHLACQSIRTGEAEMSVVGGANLMFGPDMSILLGAAKILSPEGKSKMWDADANGFARGEGFGVTILKPLDAAIRDGDNIRAVVLATAANEDGRTPGISLPNSEAQQELIRTAYRQAGVDPAETGYVEAHGTGTQAGDPLEARAILKTIGSVENRTSDLYVGSVKTNIGHLEGAAGVAGIIKAALTVERGMILPNLWFEKLNPDIDLPENVKIASKLTP…
Alternaria_rosae_BMP_2777_GCA_024043135.1	g11814	KS-AT-DH-MT-ER-KR-xCP	MAYEDTKPMPIAIVGFGCRFPGNVTNGEKLWQMLVEKKSARTDVPPDRFNVDAFYNPDGDRFGTCNNRGGHYLAEDVSLFDAPFFSISPAEAMAMDPMQRLLLEVTYEALENSGTPLARVSGSQTSCYVGCFTKDYEEMQRRDMELAPKYQSTGASQTMLSNRLSYFFNLKGPSVSIDTACSSGLVAVHLACQSLRTGESSMAIAGGSNLILSPDIQIEMSDMHFLSPDSISHAFDDRANGYARGEGVGAIILKPLDLALRDNDPIRAIIRGTAASSDGRTPGITMPSKDAQVDLIRSAYRAAGIDVSETGYFEAHGTGTAAGDPIESGAIGEVFTASRPHRISATTEGVVPLSIGSVKTNMGHLEGASGIAGLIKAMLSVEKGMIAPNLWFNRGNPAI…
Alternaria_rosae_BMP_2777_GCA_024043135.1	g2156	KS-AT-DH-MT-ER-KR-xCP	MEPIAIVGLSYKLPEREDGDYSFWENLERGRTLSRPWPKSRGNIDAFLSTNMALDNTVYSKNAHFVKDDPAAFDAAFFSITSKEAASMDPQQRWLLETSYKALENAGIPPETLAGSQTSVFAASMSDDYSRILARDPDEAPTNTATGISPSILANRLSWYFDFKGPSIQLNTACSTSMIAMDLACQSLRSGQSSMALVAGANVLLSVEISLYLSNMQMLSPDGVSYSFDHRANGYARGEGAVVLVLKRLSDAIRDSDVIRAVVRATGSNQDGRTPGITQPSAESQEQLIRQVYKSCNLGFESTRYVEAHGTGTQLGDATEMKAIGRTFRASRSQKEPLYVGSVKSNIGHLEGCSGLAGILKSIMILEKGIIPPSALFEKISPKINARIYNVEVPTTCMP…
Alternaria_rosae_BMP_2777_GCA_024043135.1	g3221	KS-AT-DH-MT-ER-KR-xCP	MPLYYTDTTPTNGIPDMNGVPSDAPPQPKSDDLSNAIAIVGISCKFGGSASNLDGLWHTLSSGESCWSEVPKSRFNISKTSHPDPLRTDSLHVKGGYFIEDDLTEFDAPFFNLTAEVAKSMDPQLRLLLEGVYNATESAGLPLEKLSGSNTSVYSATFGRDYTEMMMKDADAMPTSLVTGNGPAMFANRVSHFYNLMGPSVTVDTGCSGGLVALHMGVNSIRNQESEVSIIGASNAILNQDFYIAISNLGLLHEDGKCYSMDHRFGGYGRGEGMAVLVLKKYSAAVRDGDHIHALIRESAVNQDGRTGTITSPSMDAQQQLIKQCYSRAGIDLSSTGYVEAHGTGTGGDAIEAEALALTFGNSREKFDPIWVGSVKSNIGHTEPVSGLAAVIKAALILR…
Alternaria_rosae_BMP_2777_GCA_024043135.1	g9481	KS-AT-DH-MT-ER-KR-xCP	MAKSEEPEPMAIVGMGCRWAGGVRNPTDLWELLLNKRSGYQDWAAPRFSAEGFYHPNPERPGTTAAKGGYVVTEDPRLFDPSFFGISGLEAETIDPSQRKLLEVVYEALESAGETWESVDGTRTGVYVADISYDNSYAQTRDWEYARPHATTGVCHNILSNRINYVFNLRGPSVTLDSACTSAMYGLHMAIQAIRDGDCDSAIVATANYIMDPSMQIAMDKLGALSGTSMSHAFDASADGYARGEGFAAIYVKKPQQAMQDGNPIRALVRGSAIGANGRSSGITHPSGTAQEDIIRKAYQNAGNLSPSETPFLECHGTGTRVGDPLEVEAAGKVFGPGRSSSEEDRLLIGSVKTNLGHTEGAAALAGIFKVVLALEAGVIPPSIGVTTLNPRIDFDKAK…
Alternaria_rosae_BMP_2777_GCA_024043135.1	g919	KS-AT-DH-MT-KR-xCP-C-A-xCP-Red	MAAHRDTSHGNGEPIAVIGSGMRFPGSSNNSSKLWELLLNPRDLLKHIPEDRFNIDNFYHPDPNHHATTDVRESYFLDEDHRHFDAGFFNIKPVEVAAIDPQQRLLMEVVYESLEAAGIPLESLIGSRTGVYVGLMCADYHDHLHKDVDTLPTYAPTGTARSIMSNRISYFFDWHGPCMTIDTACSSSLVAVHQAVQLLRSGDSDVAVAAGVNMILGSGQYIAESSLHMLSADSRSRMWDADASGYARGEGVASVILKRLSTALADGDKIECIIRESGVNQDGRTKGITMPSASAQMDLIEQTYKKAGLDPKDPNQRCQYFEAHGTGTAAGDPKEAEAISKAFFYPGDSTSHNGDPLYVGSIKTVIGHTEGTAGLAGLLKASLAVQHGVIPPNLLFNKL…
Alternaria_rosae_BMP_2777_GCA_024043135.1	g3812	KS-AT-DH-MT-KR-xCP-Red	MSPKAPINEPIAIIGSGCRFAGGASSPSKLWDLLRDPKDIRSNITDKRFNAEGFYHPDGTHHGHMNVMQSYLLDEDTRVFDAEFFGINPVEAKAMDPQQRLLLEVVYESIESAGLSLDRMRGSDTAVFAGLMCGDYEAMMLRDLDQAPTHFATGTSRAVMSNRVSYFFDWRGPSVTIDTACSSSLVAVHQAIQTLRSGDSHTVVACGSNLIFGPEMYVVESKLKMLSPDSLSRMWDKDANGYARGEGVTAVVLKTLSQALADNDKIEAVIRETGVNSDGATPGITMPSASAQRDLIHSVYKKAGLNPHSAEDRPQFIEAHGTGTPAGDPIEAEALSTAFFSDTEKSSIPIYTGSIKTVLGHTEGSAGIAALLKVTQAMQNSTMPPNLWFQQLNPKLEPF…
Alternaria_rosae_BMP_2777_GCA_024043135.1	g822	SAT-KS-AT-DH-xCP-xCP-MT	MRSQSDHFAPSVAFFCPQSKAPTEVYLEQLQKYIVETPLLLPFAEAITSLTDTWTILCDGHPDIAKLKSGKRHVVSLKRWITDGISGPVSSSMSGILALPLLVVIQVCQYFQLLELHGLTHERMLANLKKGGGAQGYCGGLPTAFAVSCAKDEEEVVHLATKALRLAFAVGAFGELGDDELMEGATTIAVRLRTPPQGDELVAGISRCYISAITDPKTISIVGPVLELEKVAERARNWGLLVTDIHIRGKVHNPENAPLVKVLFDICQEHDEMTLPDASQLQVPVRSNLDGSLLHDCSLTYEAINTILASRCEWYRLLKDVAKDLAGSGTDAHTFALFGIGDPVPLMPFHNARLRISKVEAHTTVQEARLAEYKYPEDAIAITGASCRLPRAADLEELW…
Alternaria_rosae_BMP_2777_GCA_024043135.1	g4294	SAT-KS-AT-PT-xCP-xCP-Te	MNVLIFGDQTADQYPLLRKACTWKNNSTLTSFLDRVSQVVREEVQKLPRTQRDQIPNFLTTWDLIEAYYAKGLKVPQLESCMVTIAQLSHYIGYYAENPSDLQNPANTRVVGLCTGLLAGSVVASARSLSELLPLAIEAVRIAFRTGTVVGAAKEALEQTPAPKETWSTIVTSISEKAAKDAITAFHQEQRIPTLAQAYISAVSTMALTISGPPATTKRLLQSDAFKGCTRVSIPVYAPYHAAHLYTEADIDQILDKDATRHLQQFRPLSLVHSASSGECHTATSTLDLIRTALGEILVQSVRWDNLLSEVVSQVTATSSQDCSVSAIGVTSITNSLVSALKSGGQSSVTARDHSSWVAAEHDSRGRTQNDKIAIVGMSGRFPGAANPDALWDLLEKGL…
Alternaria_rosae_MPI_PUGE_AT_0040_GCA_020736505.1	g1745	KS-AT-DH-ER-KR-xCP	MVINDSGHEDYGLNQRTSAASTAPKPRRYTQEPIAVVGMGCRLPGDSNSPHALWDFLERGGIADNTPPQSRFRLDTHHDGSKKPKTMRSPGGMFLENIDPKKFDAAFFSTGKLDAIAMDPQQRQLLEVVYECLENAGIPLEKLDGEAIGCFVGSYGVDYADMQARDPDDRAPSVTIGVGRAILSNRISHFLNIHGPSMTIDTACSGSLVGVDVACRYLSSGEIDGALVAGANLYFNPEHNMDSGPMKGASSLSGRCHTFDKKADGYIKGEAINCVMLKRLCDAERDGDPIRAIIRGTSTNSDGKTPGIASPSSEAQAKATRAAYANAGITNLSATGYIEMHGTGTQAGDPQEVKGVASVFSSSRPENAPLIMGSIKSNVGHSEPAAGISGLMKAIMSVE…
Alternaria_rosae_MPI_PUGE_AT_0040_GCA_020736505.1	g3531	KS-AT-DH-ER-KR-xCP	MSNKEFKAEPIAIVGVGCRFSGSATNPEGLWDMLSKGTTGWTKTASHRFNLNAFWHPNGDNKGTFNTKGFHLLKQNPALFDNDFFGIGGLEAKAMDPQQRILLEVAYEAFENAGLSMDELRGSQTGVWCSVSNADYESILARDPDISPGYRMTGTGNAIVSNRISYLFDLRGPSMTIDTFCSSTLVGLDAAVKSIRAGTVKQAFVGGSNLCLDPERTGVLSSMSFTSPDGRCYAFDPRANGYGRGEGVAAVILKPLSAALADGDSIRAVIRGTGVSSDGKTNGITLPSDWGQKQALRMAYEDAGLRPQDTYFVEAHGTGTKAGDRTEATVWMDTFLRGRAKDLPLVIGSVKANLGHTEPTAGLAGLLKAILVLEQGIIPATPTHKSLSPDVADVLGDSL…
Alternaria_rosae_MPI_PUGE_AT_0040_GCA_020736505.1	g6229	KS-AT-DH-ER-KR-xCP	MNASADSEQPFMAPSSQPCSVEPIAIVGFGLKFPQDITDAQSLWKLLMERRSTMTEIPKNRWNIDGFYKEHGHRPGTVKNRGGHFLADDPARFDAPFFSIQPAEAECMDPQQRLLLETSYHALENAGIPMQAAIGTRTSVHVGCLLQEYSQISQRDAQMPGDYRIVGSSGLAMLANRLSWFYDFSGPSMTVDTACSGGLVALHLACQELLAGSVDMSLVGGNNLCLLPDSTALLSSLNMMSKDSVCYSFDERASGYARGEGFGVLILKRLDKAIADGDTIRGVIRSTGCGQDGNTPSITSPSQSAQERLIHETYARAGLDLGDTRYFEAHGTGTPVGDPCEAAAINNVFSSRTPEDPIFVGALKGNMGHPEGASGIAGVIKSLLVLEKGIIPPNVYPER…
Alternaria_rosae_MPI_PUGE_AT_0040_GCA_020736505.1	g10041	KS-AT-DH-KR-xCP	MESPDSNQCSSGSFSPVEMPSSVTEAELRELTELDDVAVIGMACRVAGGNHSPEQLWESILAKRVASSEIPPMRWEPYRHRDVRNIKALDNTTSRGYYLDALEDFDPYFFGISPKEAEQMDPQQRVSLEVAWEALEHAGIDPKELSGSDTSVFMGVNSDDYGKLLLEDLPNIEPWLGIGTAYCGIPNRISYQLNLMGPSTAVDAACASSLVAIHHGRQAILCGESKIAITGGVNALCGPGLTRVLDKAGAISPDGSCLSFDDNAHGYGRGEGAAVVVLKRLRDAIKDGDNIIALLKGSAVAQDGKTNGIMAPNAKAQELVARQALKQANIDPATVEYVEAHATSTPLGDPTEVSAISAVYGVSRSKPVNIGSVKPNVGHLEAGAGAIGFVKAVLALNKT…
Alternaria_rosae_MPI_PUGE_AT_0040_GCA_020736505.1	g10721	KS-AT-DH-MT-ER-KR-xCP	MTYEDTKPMPIAIVGFGCRFPGDVTNGEKLWQMLVEKKSARTDVPPDRFNVDAFYNPDGDRFGTCNNRGGHYLAEDVSLFDAPFFSISPAEAMAMDPMQRLLLEVTYEALENSGTPLARVSGSQTSCYVGCFTKDYEEMQRRDMELAPKYQSTGASQTMLSNRLSYFFNLKGPSVSIDTACSSGLVAVHLACQSLRTGESSMAIAGGSNLILSPDIQIEMSDMHFLSPDSISHAFDDRANGYARGEGVGAIILKPLDLALRDNDPIRAIIRGTAASSDGRTPGITMPSKDAQVDLIRSAYRAAGIDVSETGYFEAHGTGTAAGDPIESGAIGEVFTASRPHRISATTEGVVPLSIGSVKTNMGHLEGASGIAGLIKAMLSVEKGMIAPNLWFSRGNQAI…
Alternaria_rosae_MPI_PUGE_AT_0040_GCA_020736505.1	g10903	KS-AT-DH-MT-ER-KR-xCP	MNKPIAIIGMSFRGPGDARNPEAFYRMLVEGRSARTEIPKDRYNVDAFYHPDPERLGSIQQRHAHFLEQDFKVFDAPFFSITPKEAKAMDPTHRILLEATYEGFENAGLTLDQVSGTKTSCYIGTFTADFPNLQARDNEGPSIYHATGMSASLASNRLSWFYNLRGPSLTVDTACSSSLTAFHLACQSIRTGEAEMSVVGGANLMFGPDMSILLGAAKILSPEGKSKMWDADANGFARGEGFGVTILKPLDAAIRDGDNIRAVVLATAANEDGRTPGISLPNSEAQQELIRTAYRQAGVDPAETGYVEAHGTGTQAGDPLEARAILKTIGSVENRTSDLYVGSVKTNIGHLEGAAGVAGIIKAALTVERGTILPNLWFEKLNPDIDLPENVKIASKLTP…
Alternaria_rosae_MPI_PUGE_AT_0040_GCA_020736505.1	g1863	KS-AT-DH-MT-ER-KR-xCP	MAKSEEPEPMAIVGMGCRWAGGVRNPTDLWELLLNKRSGYQDWAAPRFSAEGFYHPNPERPGTTAAKGGYVVTEDPRLFDPSFFGISGLEAETIDPSQRKLLEVVYEVLESAGETWESVDGTRTGVYVADISYDNSYAQTRDWEYARPHATTGVCHNILSNRINYVFNLRGPSVTLDSACTSAMYGLHMAIQAIRDGDCDSAIVATANYIMDPSMQIAMDKLGALSGTSMSHAFDASADGYARGEGFAAIYVKKPQQAMQDGNPIRALVRGSAIGANGRSSGITHPSGTAQEDIIRKAYQNAGNLSPSETPFLECHGTGTRVGDPLEVEAAGKVFGPGRSSSEEDRLLIGSVKTNLGHTEGAAALAGIFKVVLALEAGVIPPSIGVTTLNPRIDFDKAK…
Alternaria_rosae_MPI_PUGE_AT_0040_GCA_020736505.1	g2668	KS-AT-DH-MT-ER-KR-xCP	MNSHSNGINGSEDHVHFGQDNVTESNEVTGIHIADTPANGVNGHGANGHGAHGFGANGLGTNGHGANAKINNSKTNGESEQKGAKAPPIAICGMACRLPGGVHSPSELWDFLHAGRDARDTVPASRYNMSAYYSPDRKPGTIVTQQGYFLDSTNDLAALDTSFFSMPRKEVEALDPQQRLLLEVAREALDDSGETGWKGSNTGVYVGSFGQDWYDTYYRDTEVHGIYQVLGPHDFMVSNRLSHELDLHGPSMTVRTACSASLVGVNEACMAMARGDCTAAIVGGSSILMAPSSTAAASETGVLSPEGSCSTFSANANGFARGEAIVAIYLKPLASAIRDGNPIRAVITGTATNHNGRTPTISRPSASGQETLIRQAYQNAGIAAADIAQTGYFECHGTG…
Alternaria_rosae_MPI_PUGE_AT_0040_GCA_020736505.1	g3149	KS-AT-DH-MT-ER-KR-xCP	MEPIAIVGLSYKLPEREDEDYSFWENLERGRTLSRPWPKSRGNIDAFLSTNMALDNTVYSKNAHFVKDDPAAFDAAFFSITSKEAASMDPQQRWLLETSYKALENAGIPPETLAGSQTSVFAASMSDDYSRILARDPDEAPTNTATGISPSILANRLSWYFDFKGPSIQLNTACSTSMIAMDLACQSLRSGQSSMALVAGANVLLSVEISLYLSNMQMLSPDGVSYSFDHRANGYARGEGAVVLVLKRLSDAIRDSDVIRAVVRATGSNQDGRTPGITQPSAESQEQLIRQVYKSCNLGFESTRYVEAHGTGTQLGDATEMKAIGRTFRASRSQKEPLYVGSVKSNIGHLEGCSGLAGILKSIMMLEKGIIPPSALFEKISPKINARIYNVEVPTTCMP…
Alternaria_rosae_MPI_PUGE_AT_0040_GCA_020736505.1	g9400	KS-AT-DH-MT-ER-KR-xCP	MPLYYTDTTPTNGIPDMNGVPSDSPPQPKSDDLSNAIAIVGISCKFGGSASNLDGLWHTLSSGESCWSEVPKSRFDISKTSHPDPLRTDSLHVKGGYFIEDDLTEFDAPFFNLTAEVAKSMDPQLRLLLEGVYNATESAGLPIEKLSGSNTSVYSATFGRDYTEMMMKDADAMPTSLVTGNGPAMFANRVSHFYNLMGPSVTVDTGCSGGLVALHMGVNSIRNQESEVSIIGASNAILNQDFYIAISNLGLLHEDGKCYSMDHRFGGYGRGEGMAVLVLKNYSAAVRDGDHIHALIRESAVNQDGRTGTITSPSMDAQQQLIKQCYSRAGIDLSSTGYVEAHGTGTGGDAIEAEALALTFGNSREKFDPIWVGSVKSNIGHTEPVSGLAAVIKAALILR…
Alternaria_rosae_MPI_PUGE_AT_0040_GCA_020736505.1	g542	KS-AT-DH-MT-KR-xCP-C-A-xCP-Red	MAAHRDTSHGNGEPIAVIGSGMRFPGSSNNSSKLWELLLNPRDLLKHIPEDRFNIDNFYHPDPNHHATTDVRESYFLDEDHRHFDAGFFNIKPVEVAAIDPQQRLLMEVVYESLEAAGIPLESLIGSRTGVYVGLMCADYHDHLHKDVDTLPTYAPTGTARSIMSNRISYFFDWHGPCMTIDTACSSSLVAVHQAVQLLRSGDSDVAVAAGVNMILGSGQYIAESSLHMLSADSRSRMWDADASGYARGEGVASVILKRLSTALADGDKIECIIRESGVNQDGRTKGITMPSASAQMDLIEQTYKKAGLDPKDPNQRCQYFEAHGTGTAAGDPKEAEAISKAFFHPGDSTSHNGDPLYVGSIKTVIGHTEGTAGLAGLLKASLAVQHGVIPPNLLFNKL…
Alternaria_rosae_MPI_PUGE_AT_0040_GCA_020736505.1	g3948	SAT-KS-AT-DH-xCP-xCP-MT	MRSQSDNFAPSVAFFCPQSKAPTEAYLEQLQKYIVETPLLLPFAEAITSLTDTWTILCDGHPDIAKLKSGKRHVVSLKRWITDGISGPVSSSMSGILALPLLVVIQVCQYFQLLELHGLTHERMLANLKKGGGAQGYCGGLPTAFAVSCAKDEEELVYLATKALRLAFAVGAFGELGDDELMEGATTIAVRLRTPPQGDELVAGISRCYISAITDPKTISIVGPVLELEKVAERARNWGLLVTDIHIRGKVHNPENAPLVKVLYEICQEHDEMTLPDASQLRVPVRSNLDGSLLHDCSLTYEAINTILASRCEWYRLLKDVAKDLAGSGTDAHTFTLFGIGDPVPLMPFHNARLRISKVEAHTTVQEARLAEYKYPEDAIAITGASCRLPRAADLEELW…
Alternaria_rosae_MPI_PUGE_AT_0040_GCA_020736505.1	g7694	SAT-KS-AT-PT-xCP-xCP-Te	MNVLIFGDQTADQYPLLRKACTWKNNSTLTSFLDRVSQVVREEVQKLPRTQRDQIPNFLTTWDLIEAYYAKGLKVPQLESCMVTIAQLSHYIGYYAENPSDLQNPANTRVVGLCTGLLAGSVVASARSLSELLPLAIEAVRIAFRTGTVVGAAKEALEQTPAPKETWSTIVTSISEKAAKDAITAFHQEQRIPTLAQAYISAVSTMALTISGPPATTKRLLQSDAFKGCTRVSIPVYAPYHAAHLYTEADIDQILDKDATRHLQQFRPLSLVHSASSGECHTATSTLDLIRTALGEILVESVRWDNLLSEVVSQVTATSSQDCSVSAIGVTSITNSLVSALKNGGQSSVTARDHSSWVAAEHDSRGRTQNDKIAIVGMSGRFPSAANPDALWDLLEKGL…
Alternaria_solani_HWC_168_2012p_GCA_002837235.1	g7011	KS-AT-DH-ER-KR-xCP	MDAFIDSEEVPMSSSSPNRVEPIAIVGFGFKFPQDITNAESFWKLLIERRSTMTEIPKNRWNIDGFYKEHGHRPGTVKNRGGHFLADDPARFDAPFFSIQPAEAECMDPQQRLLLETSYHALENAGIPMQAAMGTRTSVHVGCLLQEYSQISQRDAQMPGDYRIVGSSGLAMLANRLSWFYDFSGPSMTVDTACSGGLVAFHLACQELSAGSVDMSLVCGNNLCLLPDSTALLSSLNMMSKDSVCYSFDERASGYARGEGFGVLILKRLATAIADGDTIRGVVRSTGCGQDGNTPSITSPSQSAQERLIRETYARAGLDLGHTRYFEAHGTGTPVGDPCEAAAISNVFSCRTPKDPIFVGALKSNMGHPEGASGIAGVIKTLLVLEKGIIPPNVYPERI…
Alternaria_solani_HWC_168_2012p_GCA_002837235.1	g3763	KS-AT-DH-MT-ER-KR-xCP	METYETSKKLNHEYIYVEHDSSGSLDGLSTPTEKSSQAFVPIAVVGMGMRLPGNCHDSEAFWDLLINQREGVIDIPSSRWNNEGFYDPHGRPGTVKTNQGNFLGSIDLADFDGSFFSMSAAQIAKVDPQHRVLLETTYEALENAGEINFRGKKVGVYVGMFADDFVEMQAKDSEPHEFLSLTGHLDLFGSNRISHEFDWSGPSMTIKTGCSAALVCLDQAFKALNAGDCDAAIVGGANLILSPALSGALGGQGVNSADGRCRSFDAKATGYGRGEAVSSLLVKRLDDALKDGNPIRAIVRSTACNDDGKTPGITQPNTDAHEALIRAAYRTAGIPEDEFHKTGFFECHGTGTAVGDPIEVGAVARVFGKDGMVIGSVKSNIGHSEGASGNTSVIKAILA…
Alternaria_solani_HWC_168_2012p_GCA_002837235.1	g4487	KS-AT-DH-MT-ER-KR-xCP	MATDKTTPIAIIGMNMKFPGDAVSAQAFWELLTSARNVSKEIPSDRFNIDAFYHPDPNRLDSLRIRHAHFMEEDPRSFDAPFFNMSYAEASVLDPQQRGLLEGAYRTFENAGIPMETLSRSPTSVYCASFSRDGETITGRDFAAQSRYHATANGSSMLSNRVSHFFDLAGPSLTVDTACSSGLYALHLGAQSILTGESAMSLVCGANTFITPESQALALSNGGFLSVDGKSYSFDEKANGYARGEGFGFVLLKPLDAAVRDNNIIRAVIRATGANQDGRTPSITQPSQQAQLDLLRDTYRVAGLNVADTTYVEAHGTGTPVGDPIEAAAIGEAFRKGRKSDSPLYVGSVKSNIGHLEGASGMAGVIKAVLALEKAVIPPIAMFEKTNPAIDTQALQLVF…
Alternaria_solani_HWC_168_2012p_GCA_002837235.1	g7380	KS-AT-DH-MT-ER-KR-xCP	MPHRSTNGTNGTNGINGFHNSNGINDVHGSNGHHTDDVQHTTTDDTSNSIAIVGISCKFGGAASNLDGLWHTLANGESCWSPIPKSRFDVSKTYHPDPLRTDSLHVKGGFFIEEDLTKFDAPFFNLTAEAAKAMDPQLRLLLEGVYQATENAGIPTEKLSGSNTSVFSASFGRDYTEMLMKDVDALPTSLVTGNGPAMFANRVSHFYNLRGPSVTVDTGCSGGLVALHMGVNSIRNQESDVSIVGASNAILNQDFFIAISNLGLLHEDGKCYSMDHRWGGYGRGEGMAVLVLKKLSAAVKDGDHIHAVIRESAVNQDGRTGTITSPSMDAQRSLIQQCYSRAGIDLASTGYVEAHLTGTGGDAIEAEALARTFGKSREACDPVWVGSVKSNIGHTEPVS…
Alternaria_solani_HWC_168_2012p_GCA_002837235.1	g8050	KS-AT-DH-MT-ER-KR-xCP	MTSQYGTNGASADPEPIAIVGMGCRWPGGVRDASSLWELLKNKRSGYREFGDHRFSRKGFHHPNSEHPGTVATEGGFLLAEDPRLFDHAFFGIGSLEVETMDPSQRKLLEVVYEAFENSGEPWDSFSGSTTGVFVGNFSSDHLIIQGRDTDHPRPYASVGTGTSILSNRVNYIFNLRGPSVTIDTACSSSMYALHLAISAIRNGDCDSAIVAASNTIIDPSTQLMMTKLGVLSPTSTSHTFDSSADGYARGEGFSALYLKRMSTAVDGDYPIRALVRGSALNANGRTGGITHPGREGQEAVIRKAYENAGNLPMKDTTFFECHGTGTPVGDPIEISAIGNVFGSATTPEKPLLVGSIKTNIGHTEPASAIAGIMKVVLALENGFIPPSIGIKKLNPKLD…
Alternaria_solani_HWC_168_2012p_GCA_002837235.1	g9433	KS-AT-DH-MT-ER-KR-xCP	MDKPVAIIGIAFRGPGDARDPEAFYRMLVEGRNARTEIPKDRYNVDAFYHPDSERLGSIQQRHAHFLQQDFKVFDAPFFSITPKEAKAMDPTHRILLEATYEGFENAGLSLEKVSGTQTSCYIGTFTADFPNLQARDNEGPSIYHATGMSASLASNRLSWFYNLRGPSLTVDTACSSSLTAFHLACQSIRTGEAEMSVVGGANLMFGPDMSILLGAAKILSPEGKSKMWDANANGFARGEGFGVTILKPLDAALRDGDNIRAVVLATAANEDGHTPGISLPNSEAQQELIRRAYQIAGVDPVETAYVEAHGTGTQAGDPLEARAILKTIGSVEGRKSDLYVGSVKTNIGHLEGAAGVAGIIKAALTVERGMIPPNLWFEKLNPEIDLPDNVKIASKLTP…
Alternaria_solani_HWC_168_2012p_GCA_002837235.1	g2255	KS-AT-DH-MT-KR-xCP-C-A-xCP	MYEPVAIVGTACRFPGAASSTSKLWDLLKAPRDVLKEFPPERLNTANFYNENGDMHGRMNVQHKSYLLEEDVRHFDAAFFRINPKEAADMDPQQRLLLETVYEAFESAGWSLDDVSGSDTSVHVGTMTDDYIIIQGRDPDTLGSHSATGVSRAILSNRVSYAFNLRGASLTLDTACSSSLVALHLAAQGLQNGEASQAVVAGSNLLMDSFYYIGESSMHLLSPDSRCRMWDKDGSGYARGEGCAAVVLKTLSQAIRDGDHIECVIRGSLVNSDGATNGITMPSPIAQAALIKQTYLNAGLDPLKDRCQYFECHGTGTQAGDPVESQAIRDVFFPLDGTQSNDEVLYCGSIKTVIGHLEGCAGLAGILKASLAIQNEAIPPNMHFNNLNPKVEPFYRNLE…
Alternaria_solani_HWC_168_2012p_GCA_002837235.1	g9083	KS-AT-DH-xCP-xCP-MT	MSPNADLDGIAIVGMGCRFPGADSIEEYWDLLHAGRSMVTEPPKGRFPSHEHGRSTDKSVFFGNYINDIESFDNRFFKKSGREAASMDPQQRLLLEVAYQALESAGFFGPREQDLDVGCFVGVCASDYNDNVASHPPNAFSTLGTLRAFLTGRISHFFGLSGPSITYDTACSSSAVAIDAACKAIAHGDCTSALAGGVSVLTSPNFFQNLAAASFLSPTGPTKSFDARADGYCRGEGVGLVVLKKLSQAVQDGDHIFGTILATSVKQSSNKVPITVPYSPSHTALYRQVLSMAGVAAEDVTYLEAHGTGTPIGDVIEFDALKATFASKRRQQPLYVGSVKSNIGHTESTSGAASLIKTLLMMQKRQIPGQANYSTPNTKIDLSEGQFVIPTRTQQWQAD…
Alternaria_solani_HWC_168_2012p_GCA_002837235.1	g9710	KS-AT-MT-ER-KR-xCP	MSKPAVPIAIIGMSCHFAGGATDPEKLWELCAEGRTGWSEIPDDRFNIDGHYHPRPDNLNTTNVKGACFLDEDIGNFDATFFNLPAETAACLDPQFRLMLEGTYEAFENAGLTMDQVFGSNTSVYAGSFFKDYHDSELRDVTTLPRFFLVGVGSAMASNRLSHYFDLRGASMSIDAGCSTTLTALHQACNDLRNHESDMSVVSGANLMLNPDMFITMSSIALISKDGRSFAFDSRANGYGRGEGAATIVLKRLDDAIRDGDPIQCVIKETGLNQDGKTETITTPSQAAQIELMRRVYKKAGLDPKDTGYFEVFAFLNSSMSFTKFIQAHAANPLPIGSIKPNVGHTECASGLASIVKVVKAIEKGLIPPAANLKTINPKLKLGEWNLKIPRTTEPWNST…
Alternaria_solani_HWC_168_2012p_GCA_002837235.1	g9709	KS-AT-xCP-MT-Red	MLAMGKPVVALFGPISPSLSQSNLNTLRATILSSPQYAWVDQVLNSLPSHYQSLVTEVSGLYNKATEAQIISLAAWLKTGTLVLDRELKPNSLLAPLVVIAQLVQYSAFLDTQDAVPELPVVGETAGFCIGLLSALAVSLSHQSTATDFGQNAAVAAFSVAWKRVDSRENRKELDCILEKMQDPLQHTLENAGFVLTELGLSGRFHSKLDYQDDFESIVEFCDKDPAFRFPTSALRIPTRTHGDIMLKDQMSLHRSALQSILLHRCEWYNTMSELKSSYPSDHTCFVSFGERCIPSSLLRDFSGRTTFFDDNTSPVLRVNPNDVAVIGMSINVAGASSANEFWDLLASGKSQHQVVSEDKFTFETTFRENDSSKKWYGNFIDGVEDFDHKFFKKTPRES…
Alternaria_solani_HWC_168_2012p_GCA_002837235.1	g4642	SAT-KS-AT-DH-xCP-MT	MRSQSSHFRPSVAFFCPQSRAPTEAYLEQLQKYIVGTPLLQPFAEAITSLRDTWGILCKGHADIAKLQSGERHVASLERWITDGVAGPVSSSMSGILALPLLVVIQICQYFQLLELHDLTHEQMLASLRNGGGAQGYCGGLPTAFAVSCAKDEEDVVRLATNALRLAFAVGAFGELGDNESIEGATTIAVRLRASQQGEELVEGIPGCYISAITDPRTISIVGPVLELKKVADRARGQGLLVTDIHIRGKVHNPENAPLVKVLFDLCQEHDEMTLPDASQLRVPVRSNLTGKLLDDCSLTHEAINTILASRCEWYRLLKEVAEDLAGSSTEAHTFALFGIGDPVPLMPFHNARLRVSKVEAHTAIQEARLAEYRYPDDAIAVTGVACRLPRANDLEELW…
Alternaria_solani_HWC_168_2012p_GCA_002837235.1	g10995	SAT-KS-AT-PT-xCP	MTRAKVLYFSGEIPQGDPEGDQRDLFRKLHLLSKERSFPILALFLETITEAVKKERLRLTRAQRDLIPTFESILDLTDHVVELRKTSLGGAVERVLVLAFQLGSFIAHHEAHPLEYNFQPSDTFLIARGPGMLSAAAVALCPSVSMIPSIAGDIARVAFRFGVVVDQVCRSLETSPDEINAAGAWIYCVYGVDPSEAQEAVARFNVLKAYAETSVASVFNDDGKSVSIGGPPSTLKTLFAECEFFKHTRNVPMKKVQGMWHTGKVYGVEHVQQIVPDIHGKHRLHLPLFSPVTGQPLEAANAKDLLEQIMEEMLTQRIRWDRTIQNVTERLKQVSPDCTQLLAIQPSQYVESLLAQWKADIPTATHTTEDMMSAIMNLPLGSSPAKDAKSSKIAVVGMA…
Alternaria_solani_HWC_168_2012p_GCA_002837235.1	g865	SAT-KS-AT-PT-xCP	MPSSSSWDSMEDAKPSLLFFNNDLPSDDINHLYRVLHRRTAQLSCPQLAHFITLCNQVITEEIAKLPKQRQENVPDFVNVLSLVNDDAFRKGPLGGAMEGVFLNILQIGMILGHHEVEQVPYQFNPKTTTLFGLGTGLLSAAAASVSLNIADLAVAGAHIARASFRLGIHVYNVSEQLEAPDADGNPWAFVIPGLTAEVVQAELDRYNCDTANPTLSHIFISASDKASVSVSGPPSRLRHCLKSCDVLRYSNFMPLPVHHGLCHAPHIYSAVDVQAIIEDILDDDHTRIAGLKTSLPLLSSSTGRPYPAKDFRSLIDQVLAELLMNKIHIDNVADGVIEVLDLPPASQQERSLFAFRNSVVLRTIMKNVEKQCDGRITFTHRDLVEWTKREESDAETPI…
Alternaria_solani_HWC_168_2012p_GCA_002837235.1	g2900	SAT-KS-AT-PT-xCP-Te	MEGIDHVYVQAAKKPWIRSFLEDLSSAIKTETKAMDRVLQEGFKDSSSFQELAERYRHAGDDFGMAHAMMIYAIRAVVLLETLSREPHILDESRPRPEVIGISGGLFSAAVMSISINFETLYAACIEAGRVWSRLCNLTLVRSRAMEESPGTWGWAILGIPASDLGKTLEQFQSSMGIPCSKIAKVGVIGDRWSTIIGPPSVLELTLSECPNLKNLPKDELNIHALQHTLSVSDSDIDYIVGNSPLLETPLPPGYRIHGLDDDFPEASYAEWRHLLRASAYQTLSRPLDIVQAVSNLNAALGASKDIEAKIIGPSSHTTYLAKCLQTAGKEVLIQNGFLASPQTSGTNDGIAIVGMAGKGPGSDDLEEFWNVILKGLDLHEEVPSDRFNLEEYYSPKHP…
Alternaria_solani_HWC_168_2012p_GCA_002837235.1	g10715	SAT-KS-AT-PT-xCP-xCP-Te	MNVLIFGDQTADQYPLLRKACTWKNNSTLTTFLDRVSQVVREEVQKLPRTQRDQIPSFLTTWDLVEAYYAKGLKIPQLESCMVTIAQLAHYIGYYSENPSDLQNPANTRVVGLCTGLLAGSVVASARSLSELLPLATEAVRIAFRTGTVVGAAKDAVEQASAPKETWSTIVTNMTEKAAKDAIAAFHQEQRTPTLAQAYISAVSTMALTISGPPATTKRLLQGDAFKGCARVAIPVYAPYHAAHIYGQADIDQILDKDAIRHLQQFRPLSLVHSASSGKCHTATSTLDLIRAALTEMLVEPVRWDNLLTEVVSQITATSSQDCSVSAIGVTTITNSLVSALRNGGQSSVTARDHTTWVAAEHDSRGRTQNDKIAIVGMSGRFPGAATPDALWDLLEKGL…
Alternaria_solani_na_GCA_002952155.1	g4777	KS-AT-DH-ER-KR-xCP	MDAFIDSEEVPMSSSSPNRVEPIAIVGFGFKFPQDITNAESFWKLLIERRSTMTEIPKNRWNIDGFYKEHGHRPGTVKNRGGHFLADDPARFDAPFFSIQPAEAECMDPQQRLLLETSYHALENAGIPMQAAMGTRTSVHVGCLLQEYSQISQRDAQMPGDYRIVGSSGLAMLANRLSWFYDFSGPSMTVDTACSGGLVAFHLACQELSAGSVDMSLVCGNNLCLLPDSTALLSSLNMMSKDSVCYSFDERASGYARGEGFGVLILKRLATAIADGDTIRGVVRSTGCGQDGNTPSITSPSQSAQERLIRETYARAGLDLGHTRYFEAHGTGTPVGDPCEAAAISNVFSCRTPKDPIFVGALKSNMGHPEGASGIAGVIKTLLVLEKGIIPPNVYPERI…
Alternaria_solani_na_GCA_002952155.1	g1860	KS-AT-DH-MT-ER-KR-xCP	MDKPVAIIGIAFRGPGDARDPEAFYRMLVEGRNARTEIPKDRYNVDAFYHPDSERLGSIQQRHAHFLQQDFKVFDAPFFSITPKEAKAMDPTHRILLEATYEGFENAGLSLEKVSGTQTSCYIGTFTADFPNLQARDNEGPSIYHATGMSASLASNRLSWFYNLRGPSLTVDTACSSSLTAFHLACQSIRTGEAEMSVVGGANLMFGPDMSILLGAAKILSPEGKSKMWDANANGFARGEGFGVTILKPLDAALRDGDNIRAVVLATAANEDGHTPGISLPNSEAQQELIRRAYQIAGVDPVETAYVEAHGTGTQAGDPLEARAILKTIGSVEGRKSDLYVGSVKTNIGHLEGAAGVAGIIKAALTVERGMIPPNLWFEKLNPEIDLPDNVKIASKLTP…
Alternaria_solani_na_GCA_002952155.1	g3639	KS-AT-DH-MT-ER-KR-xCP	MTSQYGTNGASADPEPIAIVGMGCRWPGGVRDASSLWELLKNKRSGYREFGDHRFSRKGFHHPNSEHPGTVATEGGFLLAEDPRLFDHAFFGIGSLEVETMDPSQRKLLEVVYEAFENSGEPWDSFSGSTTGVFVGNFSSDHLIIQGRDTDHPRPYASVGTGTSILSNRVNYIFNLRGPSVTIDTACSSSMYALHLAISAIRNGDCDSAIVAASNTIIDPSTQLMMTKLGVLSPTSTSHTFDSSADGYARGEGFSALYLKRMSTAVDGDYPIRALVRGSALNANGRTGGITHPGREGQEAVIRKAYENAGNLPMKDTTFFECHGTGTPVGDPIEISAIGNVFGSATTPEKPLLVGSIKTNIGHTEPASAIAGIMKVVLALENGFIPPSIGIKKLNPKLD…
Alternaria_solani_na_GCA_002952155.1	g5146	KS-AT-DH-MT-ER-KR-xCP	MPHRSTNGTNGTNGINGFHNSNGINDVHGSNGHHTDDVQHTTTDDTSNSIAIVGISCKFGGAASNLDGLWHTLANGESCWSPIPKSRFDVSKTYHPDPLRTDSLHVKGGFFIEEDLTKFDAPFFNLTAEAAKAMDPQLRLLLEGVYQATENAGIPTEKLSGSNTSVFSASFGRDYTEMLMKDVDALPTSLVTGNGPAMFANRVSHFYNLRGPSVTVDTGCSGGLVALHMGVNSIRNQESDVSIVGASNAILNQDFFIAISNLGLLHEDGKCYSMDHRWGGYGRGEGMAVLVLKKLSAAVKDGDHIHAVIRESAVNQDGRTGTITSPSMDAQRSLIQQCYSRAGIDLASTGYVEAHLTGTGGDAIEAEALARTFGKSREACDPVWVGSVKSNIGHTEPVS…
Alternaria_solani_na_GCA_002952155.1	g7332	KS-AT-DH-MT-ER-KR-xCP	MATDKTTPIAIIGMNMKFPGDAVSAQAFWELLTSARNVSKEIPSDRFNIDAFYHPDPNRLDSLRIRHAHFMEEDPRSFDAPFFNMSYAEASVLDPQQRGLLEGAYRTFENAGIPMETLSRSPTSVYCASFSRDGETITGRDFAAQSRYHATANGSSMLSNRVSHFFDLAGPSLTVDTACSSGLYALHLGAQSILTGESAMSLVCGANTFITPESQALALSNGGFLSVDGKSYSFDEKANGYARGEGFGFVLLKPLDAAVRDNNIIRAVIRATGANQDGRTPSITQPSQQAQLDLLRDTYRVAGLNVADTTYVEAHGTGTPVGDPIEAAAIGEAFRKGRKSDSPLYVGSVKSNIGHLEGASGMAGVIKAVLALEKAVIPPIAMFEKTNPAIDTQALQLVF…
Alternaria_solani_na_GCA_002952155.1	g8055	KS-AT-DH-MT-ER-KR-xCP	METYETSKKLNHEYIYVEHDSSGSLDGLSTPTEKSSQAFVPIAVVGMGMRLPGNCHDSEAFWDLLINQREGVIDIPSSRWNNEGFYDPHGRPGTVKTNQGNFLGSIDLADFDGSFFSMSAAQIAKVDPQHRVLLETTYEALENAGEINFRGKKVGVYVGMFADDFVEMQAKDSEPHEFLSLTGHLDLFGSNRISHEFDWSGPSMTIKTGCSAALVCLDQAFKALNAGDCDAAIVGGANLILSPALSGALGGQGVNSADGRCRSFDAKATGYGRGEAVSSLLVKRLDDALKDGNPIRAIVRSTACNDDGKTPGITQPNTDAHEALIRAAYRTAGIPEDEFHKTGFFECHGTGTAVGDPIEVGAVARVFGKDGMVIGSVKSNIGHSEGASGNTSVIKAILA…
Alternaria_solani_na_GCA_002952155.1	g10596	KS-AT-DH-MT-KR-xCP-C-A-xCP	MYEPVAIVGTACRFPGAASSTSKLWDLLKAPRDVLKEFPPERLNTANFYNENGDMHGRMNVQHKSYLLEEDVRHFDAAFFRINPKEAADMDPQQRLLLETVYEAFESAGWSLDDVSGSDTSVHVGTMTDDYIIIQGRDPDTLGSHSATGVSRAILSNRVSYAFNLRGASLTLDTACSSSLVALHLAAQGLQNGEASQAVVAGSNLLMDSFYYIGESSMHLLSPDSRCRMWDKDGSGYARGEGCAAVVLKTLSQAIRDGDHIECVIRGSLVNSDGATNGITMPSPIAQAALIKQTYLNAGLDPLKDRCQYFECHGTGTQAGDPVESQAIRDVFFPLDGTQSNDEVLYCGSIKTVIGHLEGCAGLAGILKASLAIQNEAIPPNMHFNNLNPKVEPFYRNLE…
Alternaria_solani_na_GCA_002952155.1	g2606	KS-AT-DH-xCP-xCP-MT	MWDGVSRTGTSCGDWSDEDMTQAARLLSPDHLGSLEYPGRLAALLHLSGQDWMLIQAEARNGKAFNWNEVADLLPGRTNKDCRKRWSKVQAGINKGAWTRVEDERLQKAVEKQGAKWALVSKSVRTRNADRLSELHGRSSHDIRNRSVALTRRGKFQDRVQSTRSSSNDVEETMRQERMSNTQDENELRLDDEYGEHGFSGMNVDSEVETPHPSLGERTDRELSFGSNTREDPHAINIVETGELSTMNPMWRWPEFTTGPLVFDEHQLSTTPDTGHSSNYNSISDASISTPSYLHSAFTNSTVLSLHEISPSTPNNRTTHTAQAFRNHHGTFNDIGDPLSLALDSSQHALSPTTAPEKKGHVTISLKQVDAGVAQDITSSILKYNDSLLNAFSLTVQHK…
Alternaria_solani_na_GCA_002952155.1	g1584	KS-AT-MT-ER-KR-xCP	MSKPAVPIAIIGMSCHFAGGATDPEKLWELCAEGRTGWSEIPDDRFNIDGHYHPRPDNLNTTNVKGACFLDEDIGNFDATFFNLPAETAACLDPQFRLMLEGTYEAFENAGLTMDQVFGSNTSVYAGSFFKDYHDSELRDVTTLPRFFLVGVGSAMASNRLSHYFDLRGASMSIDAGCSTTLTALHQACNDLRNHESDMSVVSGANLMLNPDMFITMSSIALISKDGRSFAFDSRANGYGRGEGAATIVLKRLDDAIRDGDPIQCVIKETGLNQDGKTETITTPSQAAQIELMRRVYKKAGLDPKDTGYFEVFAFLNSSMSFTKFIQAHAANPLPIGSIKPNVGHTECASGLASIVKVVKAIEKGLIPPAANLKTINPKLKLGEWNLKIPRTTEPWNST…
Alternaria_solani_na_GCA_002952155.1	g1585	KS-AT-xCP-MT-Red	MSSPMLAMGKPVVALFGPISPSLSQSNLNTLRATILSSPQYAWVDQVLNSLPSHYQSLVTEVSGLYNKATEAQIISLAAWLKTGTLVLDRELKPNSLLAPLVVIAQLVQYSAFLDTQDAVPELPVVGETAGFCIGLLSALAVSLSHQSTATDFGQNAAVAAFSVAWKRVDSRENRKELDCILEKMQDPLQHTLENAGFVLTELGLSGRFHSKLDYQDDFESIVEFCDKDPAFRFPTSALRIPTRTHGDIMLKDQMSLHRSALQSILLHRCEWYNTMSELKSSYPSDHTCFVSFGERCIPSSLLRDFSGRTTFFDDNTSPVLRVNPNDVAVIGMSINVAGASSANEFWDLLASGKSQHQVVSEDKFTFETTFRENDSSKKWYGNFIDGVEDFDHKFFKKT…
Alternaria_solani_na_GCA_002952155.1	g6244	SAT-KS-AT-DH-xCP-MT	MRSQSSHFRPSVAFFCPQSRAPTEAYLEQLQKYIVGTPLLQPFAEAITSLRDTWGILCKGHADIAKLQSGERHVASLERWITDGVAGPVSSSMSGILALPLLVVIQICQYFQLLELHDLTHEQMLASLRNGGGAQGYCGGLPTAFAVSCAKDEEDVVRLATNALRLAFAVGAFGELGDNESIEGATTIAVRLRASQQGEELVEGIPGCYISAITDPRTISIVGPVLELKKVADRARGQGLLVTDIHIRGKVHNPENAPLVKVLFDLCQEHDEMTLPDASQLRVPVRSNLTGKLLDDCSLTHEAINTILASRCEWYRLLKEVAEDLAGSSTEAHTFALFGIGDPVPLMPFHNARLRVSKVEAHTAIQEARLAEYRYPDDAIAVTGVACRLPRANDLEELW…
Alternaria_solani_na_GCA_002952155.1	g2327	SAT-KS-AT-PT-xCP	MPSSSSWDSMEDAKPSLLFFNNDLPSDDINHLYRVLHRRTAQLSCPQLAHFITLCNQVITEEIAKLPKQRQENVPDFVNVLSLVNDDAFRKGPLGGAMEGVFLNILQIGMILGHHEVEQVPYQFNPKTTTLFGLGTGLLSAAAASVSLNIADLAVAGAHIARASFRLGIHVYNVSEQLEAPDADGNPWAFVIPGLTAEVVQAELDRYNCDTANPTLSHIFISASDKASVSVSGPPSRLRHCLKSCDVLRYSNFMPLPVHHGLCHAPHIYSAVDVQAIIEDILDDDHTRIAGLKTSLPLLSSSTGRPYPAKDFRSLIDQVLAELLMNKIHIDNVADGVIEVLDLPPASQQERSLFAFRNSVVLRTIMKNVEKQCDGRITFTHRDLVEWTKREESDAETPI…
Alternaria_solani_na_GCA_002952155.1	g270	SAT-KS-AT-PT-xCP	MTRAKVLYFSGEIPQGDPEGDQRDLFRKLHLLSKERSFPILALFLETITEAVKKERLRLTRAQRDLIPTFESILDLTDHVVELRKTSLGGAVERVLVLAFQLGSFIAHHEAHPLEYNFQPSDTFLIARGPGMLSAAAVALCPSVSMIPSIAGDIARVAFRFGVVVDQVCRSLETSPDEINAAGAWIYCVYGVDPSEAQEAVARFNVLKAYAETSVASVFNDDGKSVSIGGPPSTLKTLFAECEFFKHTRNVPMKKVQGMWHTGKVYGVEHVQQIVPDIHGKHRLHLPLFSPVTGQPLEAANAKDLLEQIMEEMLTQRIRWDRTIQNVTERLKQVSPDCTQLLAIQPSQYVESLLAQWKADIPTATHTTEDMMSAIMNLPLGSSPAKDAKSSKIAVVGMA…
Alternaria_solani_na_GCA_002952155.1	g8966	SAT-KS-AT-PT-xCP-Te	MEGIDHVYVQAAKKPWIRSFLEDLSSAIKTETKAMDRVLQEGFKDSSSFQELAERYRHAGDDFGMAHAMMIYAIRAVVLLETLSREPHILDESRPRPEVIGISGGLFSAAVMSISINFETLYAACIEAGRVWSRLCNLTLVRSRAMEESPGTWGWAILGIPASDLGKTLEQFQSSMGIPCSKIAKVGVIGDRWSTIIGPPSVLELTLSECPNLKNLPKDELNIHALQHTLSVSDSDIDYIVGNSPLLETPLPPGYRIHGLDDDFPEASYAEWRHLLRASAYQTLSRPLDIVQAVSNLNAALGASKDIEAKIIGPSSHTTYLAKCLQTAGKEVLIQNGFLASPQTSGTNDGIAIVGMAGKGPGSDDLEEFWNVILKGLDLHEEVPSDRFNLEEYYSPKHP…
Alternaria_solani_na_GCA_002952155.1	g550	SAT-KS-AT-PT-xCP-xCP-Te	MNVLIFGDQTADQYPLLRKACTWKNNSTLTTFLDRVSQVVREEVQKLPRTQRDQIPSFLTTWDLVEAYYAKGLKIPQLESCMVTIAQLAHYIGYYSENPSDLQNPANTRVVGLCTGLLAGSVVASARSLSELLPLATEAVRIAFRTGTVVGAAKDAVEQASAPKETWSTIVTNMTEKAAKDAIAAFHQEQRTPTLAQAYISAVSTMALTISGPPATTKRLLQGDAFKGCARVAIPVYAPYHAAHIYGQADIDQILDKDAIRHLQQFRPLSLVHSASSGKCHTATSTLDLIRAALTEMLVEPVRWDNLLTEVVSQITATSSQDCSVSAIGVTTITNSLVSALRNGGQSSVTARDHTTWVAAEHDSRGRTQNDKIAIVGMSGRFPGAATPDALWDLLEKGL…
Alternaria_sp._Ai002NY15_Ai002NY15_GCA_023758125.1	g12251	KS-AT-DH-ER-KR-xCP	MVINDSGHEDYSLNQRASAVSAAPKPRRYTQEPIAVVGMGCRLPGDSNSPHALWDFLERGGIADNTPPQSRFRLDTHHDGSKKPKTMRSPGGMFLENIDPKKFDAAFFSTGKLDAIAMDPQQRQLLEVVYECLENAGIPLEKLDGEAIGCFVGSYGVDYADMQARDPDDRAPSVTIGVGRAILSNRISHFLNIHGPSMTIDTACSGSLVGVDVACRYLSSGEIDGALVAGANLYFNPEHNMDSGPMKGASSLSGRCHTFDKKADGYIKGEAINCVMLKRLCDAERDGDPIRAIIRGTSTNSDGKTPGIASPSSEAQAKATRAAYANAGISDLSATGYIEMHGTGTQAGDPQEVKGVASVFSSSRPENAPLIMGSIKSNVGHSEPAAGISGLMKAIMSVE…
Alternaria_sp._Ai002NY15_Ai002NY15_GCA_023758125.1	g368	KS-AT-DH-ER-KR-xCP	MNTSPDTEQPPMAPSNQPPGVEPIAIVGFGFKFPQDITDAQSLWKLLMERRSTMTEIPKNRWNIDGFYKEHGHRPGTVKNRGGHFLADDPARFDAPFFSIQPAEAECMDPQQRLLLETSYHALENAGIPMQAAIGTRTSVHVGCLLQEYSQISQRDAQMPGDYRIVGSSGLAMLANRLSWFYDFSGPSMTVDTACSGGLVALHLACQELLAGSVDMSLVGGNNLCLLPDSTALLSSLNMMSKDSVCYSFDERASGYARGEGFGVLILKRLDKAVADGDTIRGVIRSTGCGQDGNTPSITSPSQSAQERLIRETYARAGLDLGDTRYFEAHGTGTPVGDPCEAAAINNVFSSRTPEDPIFVGALKGNMGHPEGASGIAGVIKSLLVLEKGIIPPNVYPER…
Alternaria_sp._Ai002NY15_Ai002NY15_GCA_023758125.1	g6368	KS-AT-DH-KR-xCP	MPVHSSVTEAELGELGECNDVAVIGMACRVAGGNHSPEQLWESILTKRDASSEIPAMRWEPYRHRDVRNIKALDEATSRGYYLDALEDFDPSFFGISPKEAEQMDPQQRISLEVAWEALESAGIDPKKLSGSDTAVFMGVNSDDYGKLLLEDLPNIEPWLGIGTAYCGIPNRISYHLDLMGPSTAVDAACASSLVAIHHGRQAILLGESKMAITGGVNAICGPGLTRVLDKAGAISPDGSCLSFDDNAHGYGRGEGAAVVVLKRFRDAIRDGDNVIALLKGSAVAQDGKTNGIMAPNAKSQELVARQALKQANVDPATVEYVEAHATSTPLGDPTEVSAISAVYGVSRSKPVNVGSVKPNVGHLEAGAGAIGFIKAVLALNKAQFPPQANLTKLNSKVD…
Alternaria_sp._Ai002NY15_Ai002NY15_GCA_023758125.1	g11384	KS-AT-DH-MT-ER-KR-xCP	MNKPIAIIGISFRGPGDARDPEAFYRMLVEGRSARTEIPKDRYNVDAFYHPDPERLGSIQQRHAHFLEQDFKVFDAPFFSITPKEAKAMDPTHRILLEATYEGFENAGLTLEQVSGTQTSCYIGTFTADFPNLQARDNEGPSIYHATGMSASLASNRLSWFYNLRGPSLTVDTACSSSLTAFHLACQSIRTGEAEMSVVGGANLMFGPDMSILLGAAKILSPEGKSKMWDADANGFARGEGFGVTILKPLDAAIRDGDNIRAVVLATAANEDGRTPGISLPNSEAQQELIRTAYRQAGVDPAETGYVEAHGTGTQAGDPLEARAILKTIGSVENRLSDLYVGSVKTNIGHLEGAAGVAGIIKAALTVERGMILPNLWFEKLNPDIDLPENVKIASKLTP…
Alternaria_sp._Ai002NY15_Ai002NY15_GCA_023758125.1	g1451	KS-AT-DH-MT-ER-KR-xCP	MATTDKTTPIAIIGMNMKFPGDAVSASSFWELIMSARNVSKEIPTDRFNIDAFYHPDPNRLDSLRIRHAHFMEEDPRSFDAPFFNMSYAEASVLDPQQRGLLEGAYRTFENAGIPMETLSRSPTSVYCASFSRDGETITGRDFSAQSRYHATANGSSMLSNRISHFFDLAGPSLTVDTACSSGLYALHLGAQSILAGESKMSLVCGANTFITPESQALALSNGGFLSVDGKSYSFDAKANGYARGEGFGFVLLKPLDAALRDGDVVRAVIRATGANQDGRTPSITQPSQQAQLDLLRDTYRVAGLNVADTDYVEAHGTGTPVGDPIEAGAVGQAFRDGRKADRPLYMGSVKANIGHLEGASGMAGVIKAVLALENAVIPPIAMFEKPNPAIDVTGLQLA…
Alternaria_sp._Ai002NY15_Ai002NY15_GCA_023758125.1	g1488	KS-AT-DH-MT-ER-KR-xCP	MARSEDPEPMAIVGMGCRWAGGVRNPTDLWELLLNKRSGYQDWAAPRFSAEGFYHPNPERPGTTAAKGGYVVTEDPRLFDPSFFGISGLEAETIDPSQRKLLEVVYESLESAGETWESVNGTRTGVYVADISYDNSYAQTRDWEYARPHATTGVCHNILSNRINYVFNLRGPSVTLDSACTSAMYGLHMAIQAIRDGDCDSAIVATANYIMDPSMQIAMDKLGALSGTSMSHAFDAAADGYARGEGFAAIYVKKPQQAMQHGNPIRALVRGSAIGANGRSSGITHPSGTAQEDIIRKAYHNAGKLSPSETPFLECHGTGTRVGDPLEVEAAGKVFGPGRSSSEEDRLLIGSVKTNLGHTEGAAALASIFKVVLALEAGVIPPSIGVTTLNPRIDFDKAK…
Alternaria_sp._Ai002NY15_Ai002NY15_GCA_023758125.1	g3058	KS-AT-DH-MT-ER-KR-xCP	MPLYYTDTTPTNGIPDMNGVPSDAPPQPKSDDLSNAIAIVGISCKFGGSASNLDGLWHTLSSGESCWSPVPKSRFDISKTSHPDSQRTDSLHVKGGFFIEDDLTEFDAPFFNLTAEVANSMDPQLRLMLEGVYNATESAGLPIEKLSGSNTSVYSATFGRDYAEMLMKDADSMPTSLVTGNGPAMFANRVSHFYNLMGPSVTVDTGCSGGLVALHMGVNSIRNQESEVSIIGASNAILNQDFYIAISNLGLLHEDGKCYSMDHRFGGYGRGEGMAVLVLKKYSAAVRDGDHIHALIRESAVNQDGRTGTITSPSMDAQQQLIKQCYSRAGIDLSTTGYVEAHGTGTGGDAIEAEALALTFGNSREKFDPIWVGSVKSNIGHTEPVSGLAAVIKAALILR…
Alternaria_sp._Ai002NY15_Ai002NY15_GCA_023758125.1	g3908	KS-AT-DH-MT-ER-KR-xCP	MEPIAIVGLSYKLPECDNEDHSFWDNLERGRSLSRPWPKSRGNVDAFYSSNLYSTNAHFVKEDPAAFDAAFFSITSKEAASMDPQQRWLLETSYKALENAGIPPETLAGSQTAVFAASMSDDYSRILARDPDEAPTNTATGTSPSILANRLSWYFDFKGPSIQMNTACSTSMIAMDLACQSLRSGQSSMALVAGANVLLSVEISLYLSNMQMLSPDGVSYSFDHRANGYARGEGAVVLVLKRLSDAIRDSDVIRAVVRATGSNQDGRTPGITQPSAESQEQLIRQVYKSSNLGFESTRYVEAHGTGTQLGDATEMKAIGRTFRASRSQKHPLYVGSVKSNIGHLEGCSGLAGILKSIMILEMGVIPPSALFEKISPKINAKIYNVEVPTKCIPWPTNGL…
Alternaria_sp._Ai002NY15_Ai002NY15_GCA_023758125.1	g9646	KS-AT-DH-MT-ER-KR-xCP	MAYEDTKPMPIAIVGFGCRFPGDVTNGEKLWQMLVEKKSARTEVPPDRFNVDAFYNPDGDRFGTCNNRGGHYLAEDVSLFDAPFFSISPAEAMAMDPMQRLLLEVTYEALENSGTPLARVSGSQTSCYVGCFTKDYEEMQRRDMELAPKYQSTGASQTMLSNRLSYFFNLKGPSVSIDTACSSGLVAVHLACQSLRSGESSMAIAGGSNLILSPDIQIEMSDMHFLSPDSISHAFDDRANGYARGEGVGAIILKPLDLAIRDNDPIRAIIRGTAASSDGRTPGITMPSKDAQVDLIRSAYRAAGIDVSETGYFEAHGTGTAAGDPIESGAIGEVFATSRPHRISATTDEVVPLSIGSVKTNMGHLEGASGIAGLIKAMLSVEKGVIAPNLWFERGNPAI…
Alternaria_sp._Ai002NY15_Ai002NY15_GCA_023758125.1	g4629	KS-AT-DH-MT-KR-xCP-C-A-xCP-Red	MTAHRETPHGNGEPIAVIGSGMRFPGSSNNSSKLWELLLNPRDLLKRIPEDRFNIDNFYHPDPNHHATTDVRESYFLEEDHRHFDAGFFNIKPVEVAAIDPQQRLLMEVVYESLEAAGIPLESLIGSRTGVYVGLMCADYHDHLHKDVDTLPTYAPTGTARSIMSNRISYFFDWHGPCMTIDTACSSSLVAVHQAVQLLRSGDSDVAVAAGVNMILGSGQYIAESSLHMLSADSRSRMWDADASGYARGEGVASVIMKRLSTALADGDKIECIIRESGVNQDGRTKGITMPSASAQMDLIEQTYKKAGLDPKDPNQRCQYFEAHGTGTAAGDPKEAEAISKAFFHPGDSTSHKGDPLYVGSIKTVIGHTEGTAGLAGLLKASLAVQHGVIPPNLLFNKL…
Alternaria_sp._Ai002NY15_Ai002NY15_GCA_023758125.1	g3761	SAT-KS-AT-DH-xCP-xCP-MT	MRTQSDHFAPSVAFFCPQSKAPTEAYLKQLQKYIVETPLLLPFAEAITSLTDTWTILCDGHPDIAKLKSGKRHVVSLKRWITDGISGPVSSSMSGILALPLLVVIQICQYFQLLELHGLTHERMLASLKKGGGAQGYCGGLPTAFAVSCAKDEEEVVHLATKALRLAFAVGTFGELGDDELVEGATTIAVRLRTPPQGDELVAGIPRCYISAITDPKTISIVGPVLELEKVAERARNRGLLVTDIHIRGKVHNPENAPLVKVLFDICQEHDDMMLPDASQLRVPVRSNLDGSLLHDCSLTHEAINTILASRCEWYRLLKDVAQDLAGSGTDAHTFALFGIGDPVPLMPFHNARLRISKMEVHTTVQGARLAEYKYPEDAIAITGVSCRLPRAADLEELW…
Alternaria_sp._Ai002NY15_Ai002NY15_GCA_023758125.1	g10864	SAT-KS-AT-PT-xCP-xCP-Te	MNVLIFGDQTADQYPLLRKACTWKNNSTLTSFLDRVSQVVREEVQKLPRTQRDQIPNFLTTWDLIEAYYAKGLKVPQLESCMVTIAQLSHYIGYYAENPSDLKNPANTRVVGLCTGLLAGSVVASARSLSELLPLAIEAVRIAFRTGTVVGAAKEALEQTPVPKETWSTIVTSISEKAAKDAITAFHQEQRIPTLAQAYISAVSTMALTISGPPSTTKRLLQSDAFKGCTRVSIPVYAPYHAAHLYTEADIDQILDKDATRHLQQFRPLSLVHSASTGECHTATSTLDLIRTALSEILVESVRWDNLLSEVVSQVTATSSQDCSVSAIGVTSITNSLVSALKSGGQSSVTARDHTSWVAAEHDSRGRTQNDKIAIVGMSGRFPGAANPDALWDLLEKGL…
Alternaria_sp._BMP_0032_BMP_0032_GCA_023758005.1	g4642	KS-AT-DH-ER-KR-xCP	MNTSTDTEQPSMASSSQSSGVEPIAIVGFGFKFPQDITDAQSLWKLLMERRSTMTEIPKNRWNIDGFYKEHGHRPGTVKNRGGHFLADDPARFDAPFFSIQPAEAECMDPQQRLLLETSYHALENAGIPMQAAIGTRTSVHVGCLLQEYSQISQRDAQMPGDYRIVGSSGLAMLANRLSWFYDFSGPSMTVDTACSGGLVALHLACQELLAGSVDMSLVGGNNLCLLPDSTALLSSLNMMSKDSVCYSFDERASGYARGEGFGVLILKRLDKAIADGDTIRGVIRSTGCGQDGNTPSITSPSQSAQERLIRETYARAGLDLGDTRYFEAHGTGTPVGDPCEAAAINNVFSSRTPEDPIFVGALKGNMGHPEGASGIAGVIKSLLVLEKGIIPPNVYPER…
Alternaria_sp._BMP_0032_BMP_0032_GCA_023758005.1	g9431	KS-AT-DH-ER-KR-xCP	MVINDSGHEDYGLNQRASAVSAAPKPRRYTQEPIAVVGMGCRLPGDSNSPHALWDFLERGGIADNTPPQSRFRLDTHHDGSKKPKTMRSPGGMFLENIDPKKFDAAFFSTGKLDAIAMDPQQRQLLEVVYECLENAGIPLEKLDGEAIGCFVGSYGVDYADMQARDPDDRAPSVTIGVGRAILSNRISHFLNIHGPSMTIDTACSGSLVGVDVACRYLSSGEIDGALVAGANLYFNPEHNMDSGPMKGASSLSGRCHTFDKKADGYIKGEAINCVMLKRLCDAERDGDPIRAIIRGTSTNSDGKTPGIASPSSEAQAKATRAAYANAGIFDLSATGYIEMHGTGTQAGDPQEVKGVASVFSSSRPENAPLIMGSIKSNVGHSEPAAGISGLMKAIMSVE…
Alternaria_sp._BMP_0032_BMP_0032_GCA_023758005.1	g5921	KS-AT-DH-KR-xCP	METPDSDQYSSSSFSPVPVHSSVTEAELGELGECNDVAVIGMACRVAGGNHSPEQLWESILAKRDASSEIPAMRWEPYHHRDVRNIKALDNTTSRGYYLDALEDFDPSFFGISPKEAEQIDPQQRISLEVAWEALESAGIDPKSLSGSDTAVFMGVNSDDYGKLLLEDLPNIEPWLGIGTAYCGIPNRISYHLNLMGPSTAVDAACASSLVAIHHGRQAILLGESKMAITGGVNAICGPGLTRVLDKAGAISPDGSCLSFDDNAHGYGRGEGAAVVVLKRFRDAIRDGDNVIALLKGSAVAQDGKTNGIMAPNAKSQELVARQALKQANVDPATVEYVEAHATSTPLGDPTEVSAISAVYGVSRSKPVNVGSVKPNVGHLEAGSGAIGFIKAVLALNKA…
Alternaria_sp._BMP_0032_BMP_0032_GCA_023758005.1	g10355	KS-AT-DH-MT-ER-KR-xCP	MPLYYTDTTPTNGIPDMNGVPSDAPPQPKSDALSNAIAIVGISCKFGGSASNLDGLWHTLSSGESCWSPVPKSRFDISKTSHPDSQRTDSLHVKGGFFIEDDLTEFDAPFFNLTAEVAKSMDPQLRLMLEGVYNATESAGLPIEKLSGSNTSVYSATFGRDYAEMLMKDADSMPTSLVTGNGPAMFANRVSHFYNLMGPSVTVDTGCSGGLVALHMGVNSIRNQESEVSIIGASNAILNQDFYIAISNLGLLHEDGKCYSMDHRFGGYGRGEGMAVLVLKKYSAAVRDGDHIHALIRESAVNQDGRTGTITSPSMDAQQQLIKQCYSRAGIDLSSTGYVEAHGTGTGGDAIEAEALALTFGNSREKFDPIWVGSVKSNIGHTEPVSGLAAVIKAALILR…
Alternaria_sp._BMP_0032_BMP_0032_GCA_023758005.1	g11117	KS-AT-DH-MT-ER-KR-xCP	MNKPIAIIGISFRGPGDARNPEAFYRMLVEGRSARTEIPKDRYNVDAFYHPDPERLGSIQQRHAHFLEQDFKVFDAPFFSITPKEAKAMDPTHRILLEATYEGFENAGLTLEQVSGTQTSCYIGTFTADFPNLQARDNEGPSIYHATGMSASLASNRLSWFYNLRGPSLTVDTACSSSLTAFHLACQSIRTGEAEMSVVGGANLMFGPDMSILLGAAKILSPEGKSKMWDADANGFARGEGFGVTILKPLDAAIRDGDNIRAVVLATAANEDGRTPGISLPNSEAQQELIRTAYRQAGVDPAETGYVEAHGTGTQAGDPLEARAILKTIGLVENRSSDLYVGSVKTNIGHLEGAAGVAGIIKAALTVERGMILPNLCFEKLNPDIDLPENVKIASKLTP…
Alternaria_sp._BMP_0032_BMP_0032_GCA_023758005.1	g5146	KS-AT-DH-MT-ER-KR-xCP	MEPIAIVGLSYKLPEGHNEDHSFWDNLQRGRSLSRPWPKSRGNIDAFYNSNVAMDNTVYSTNAHFVKEDPAAFDAAFFSITSKEAASMDPQQRWLLETSYKALENAGIPPETLAGSQTAVFAASMSDDYSRILARDPDEAPTNTATGTSPSILANRLSWYFDFKGPSIQLNTACSTSMIAMDLACHSLRSGQSSMALLAGANVLLSVEISLYLSNMQMLSPDGVSYSFDHRANGYARGEGAVVLVLKRLSDAIRDSDVIRAVVRATGSNQDGRTPGITQPSAESQEQLIRHVYKSCNLGFESTRYVEAHGTGTQLGDATEMKAIGRAFRASRSQKHPLYVGSVKSNIGHLEGCSGLAGILKSIMILEMGVIPPSALFEKISPKINAKIYNVEVPTKCIP…
Alternaria_sp._BMP_0032_BMP_0032_GCA_023758005.1	g7532	KS-AT-DH-MT-ER-KR-xCP	MAYEDTKPMPIAIVGFGCRFPGDVTNGEKLWQMLVEKKSARTEVPPDRFNVDAFYNPDGDRFGTCNNRGGHYLAEDVSLFDAPFFSISPAEAMAMDPMQRLLLEVTYEALENSGTPLARVSGSQTSCYVGCFTKDYEEMQRRDMELAPKYQSTGASQTMLSNRLSYFFNLKGPSVSIDTACSSGLVAVHLACQSLRTGESSMAIAGGSNLILSPDIQIEMSDMHFLSPDSISHAFDDRANGYARGEGVGAIILKPLDLAIRDNDPIRAIIRGTAASSDGRTPGITMPSKDAQVDLIRSAYRAAGIDVSETGYFEAHGTGTAAGDPIESGAIGEVFATSRPHRISATTEEVVPLSIGSVKTNMGHLEGASGIAGLIKAMLSVEKGMIAPNLWFERGNPAI…
Alternaria_sp._BMP_0032_BMP_0032_GCA_023758005.1	g9552	KS-AT-DH-MT-ER-KR-xCP	MARSEDPEPMAIVGMGCRWAGGVRNPTDLWELLLNKRSGYHDWAAPRFSAEGFYHPNPERPGTTAAKGGYVVTEDPRLFDPSFFGISGLEAETIDPSQRKLLEVVYESLESAGETWESVNGTRTGVYVADISYDNSYAQTRDWEYARPHATTGVCHNILSNRINYVFNLRGPSVTLDSACTSAMYGLHMAIQAIRDGDCDSAIVATANYIMDPSMQIAMDKLGALSGTSMSHAFDAAADGYARGEGFAAIYVKKPQQAMQDGNPIRALVRGSAIGANGRSSGITHPSGTAQEDIIRKAYHNAGNLSPSETPFLECHGTGTRVGDPLEVEAAGKVFGPGRSSSEEDRLLIGSVKTNLGHTEGAAALASIFKVVLALEAGVIPPSIGVTTLNPRIDFDKAK…
Alternaria_sp._BMP_0032_BMP_0032_GCA_023758005.1	g9585	KS-AT-DH-MT-ER-KR-xCP	MATTDKTTPIAIIGMNMKFPGDAVSASSFWELIMSARNVSKEIPADRFNIDAFYHPDPNRLDSLRIRHAHFMEEDPRSFDAPFFNMSYAEASVLDPQQRGLLEGAYRTFENAGIPMETLSRSSTSVYCASFSRDGETITGRDFSAQSRYHATANGSSMLSNRISHFFDLAGPSLTVDTACSSGLYALHLGAQSILAGESKMSLVCGANTFITPESQALALSNGGFLSVDGKSYSFDAKANGYARGEGFGFVLLKPLDAALRDGDVVRAVIRATGANQDGRTPSITQPSQQAQLDLLRDTYRVAGLNVADTDYVEAHGTGTPVGDPIEAAAVGQAFRDGRNADRPLYMGSVKANIGHLEGASGMAGVIKAVLALENAVIPPIAMFEKPNPAIDVTGLQLA…
Alternaria_sp._BMP_0032_BMP_0032_GCA_023758005.1	g6908	KS-AT-DH-MT-KR-xCP-C-A-xCP-Red	MTAHRETSQGNGEPIAVIGSGMRFPGSSNNSSKLWELLLNPRDLLKRIPEDRFNIDNFYHPDPNHHATTDVRESYFLEEDHRHFDAGFFNIKPVEVAAIDPQQRLLMEVVYESLEAAGIPLESLIGSRTGVYVGLMCADYHDHLHKDVDTLPTYAPTGTARSIMSNRISYFFDWHGPCMTIDTACSSSLVAVHQAVQLLRSGDSDVAVAAGVNMILGSGQYIAESSLHMLSADSRSRMWDADASGYARGEGVASVILKRLSTALADGDKIECIIRESGVNQDGRTKGITMPSASAQMDLIEQTYKKAGLDPKDPNQRCQYFEAHGTGTAAGDPKEAEAISKAFFHPGDSTAHDGDPLYVGSIKTVIGHTEGTAGLAGLLKASLAVQHGVIPPNLLFNKL…
Alternaria_sp._BMP_0032_BMP_0032_GCA_023758005.1	g8178	SAT-KS-AT-DH-xCP-xCP-MT	MRTQSDHFAPSVAFFCPQSKAPTEAYLKQLQKYIVETPLLLPFAEAITSLTDTWTILCDGHPDIAKLKSGKRHVVSLKRWITDGISGPVSSSMSGILALPLLVVIQICQYFQLLELHGLTHERMLASLKKGGGAQGYCGGLPTAFAVSCAKDEEEVVHLATKALRLAFAVGAFGELGDDELVEGATTIAVRLRTPPQGDELVAGIPRCYISAITDPKTISIVGPVLELEKVAERARNRGLLVTDIHIRGKVHNPENAPLVKVLFDICREHDDMMLPDASQLRVPVRSNLDGSLLHDCSLTHEAINTILASRCEWYRLLKDVAQDLAGSGTDAHTFALFGIGDPVPLMPFHNARLRISKMEVHTTVQGARLAEYKYPEDAIAITGVSCRLPRAADLEELW…
Alternaria_sp._BMP_0032_BMP_0032_GCA_023758005.1	g829	SAT-KS-AT-PT-xCP-xCP-Te	MNVLIFGDQTADQYPLLRKACTWKNNSTLTSFLDRVSQVVREEVQKLPRTQRDQIPNFLTTWDLIEAYYAKGLKVPQLESCMVTIAQLSHYIGYYAENPSDLKNPANTRVVGLCTGLLAGSVVASARSLSELLPLAIEAVRIAFRTGTVVGAAKEALEQTPVPKETWSTIVTSISEKAAKDAITAFHQEQRIPTLAQAYISAVSTMALTISGPPSTTKRLLQSDAFKGCTRVSIPVYAPYHAAHLYTEADIDQILDKDATRHLQQFRPLSLVHSASTGECHTATSTLDLIRTALSEILVESVRWDNLLSEVVSQVTATSSQDCSVSAIGVTSITNSLVSALKSGGQSSVTARDHTSWVAAEHDSRGRTQNDKIAIVGMSGRFPGAANPDALWDLLEKGL…
Alternaria_tenuissima_ANJ_GCA_017589455.1	g8089	KS-AT-DH-ER-KR-xCP	MNDFIDPEGTFMSASSHNGVVPIAIVGFGFKFPQDITNAESLWKLLMERRSTMTEIPQNRWNIDGFYKEHGHRPGTVKNRGGHFLADDPARFDAPFFSVQPAEAECMDPQQRLLLETSYHALENAGIPMKAAMGTRTSVHVGCLLQEYSQISQRDSQMPGDYRIVGSSGLAMLANRLSWFYDFSGPSMTVDTACSGGLVAFHLACQELSAGSVDMSLVCGNNLCLLPDSTALLSSLNMMSKDSVCYSFDERASGYARGEGFGVLILKRLDTAIADGDTIRGVVRSTGCGQDGNTPSITSPSQSAQERLIRETYARAGLDLGDTRYFEAHGTGTPVGDPCEAAAISNVFSCRTPEDPIFVGALKSNMGHPEGASGIAGVIKTLLVLEKGIIPPNVYPERI…
Alternaria_tenuissima_ANJ_GCA_017589455.1	g11678	KS-AT-DH-MT-ER-KR-xCP	MEPIAIVGLAYKLPQDIEDEASFWRILEQGQSVMTEWPKSRVDVNTFARSPEAALNTLTSTRGHFLKQNLASFDAPFFSISSKEASAMDPQQRMLLETSYHALENAGIPLSRIAGTETGVFVGTMESDYHRMISKDPDDAPMTTATGISVSIMANRLSWYFDLKGPSMQLNTACSSSMIAVDLGCQSIRSGQTSTVLVAGSSLMLDPEYSLYLSNMNMLSPDGICHSFDDRANGYSRGEGVIVMILKKLSTAISDGDNIRAVIRGTGSNQDGRTPGITQPSSVSQENLIRHTYRTCNLGFESTRYIEAHGTGTQIGDAMEMRALGAVFRTARSPKAPLFVGSVKTNIGHLEGGSGLAGIAKSILILEKGFIPPNALFEKLNTKVNAKRNNIQVPGSCIR…
Alternaria_tenuissima_ANJ_GCA_017589455.1	g4707	KS-AT-DH-MT-ER-KR-xCP	MNKPVAIIGIAFRGPGDARDPEAFYRMLVEGRNARTKIPKDRYNVDAFYHPDAERLGSIQQRHAHFLQQDFKVFDAPFFSITPKEAKAMDPTHRILLEATYEGFENAGLSLEKVSGTQTSCYIGTFTADFPNLQARDNEGPSIYHATGMSASLASNRLSWFYNLRGPSLTVDTACSSSLTAFHLACQSIRTGEAEMSVVGGANLMFGPDMSILLGAAKILSPEGKSKMWDANANGFARGEGFGVTILKPLDAALRDGDNIRAVVLATAANEDGHTPGISLPNSEAQQELIRRAYQMAGVDPAETGYVEAHGTGTQAGDPLEARAILNTVGSVEGRRSDLYVGSVKTNIGHLEGAAGVAGIIKAALIVERGMIPPNLWFEKLNPEIDLPENVKIASKLTP…
Alternaria_tenuissima_ANJ_GCA_017589455.1	g6949	KS-AT-DH-MT-ER-KR-xCP	MATDRTTPIAIIGMNMKFPGDAVSSQAFWELLMSARNVSKEIPSDRFNIDAFYHPDPNRLDSLRIRHAHFMEEDPRSFDAPFFNMSYAEASVLDPQQRGLLEGAYRTFENAGIPMETLSRSPISVYCASFSRDGETITGRDFASQSRYHATANGSSMLSNRVSHFFDLAGPSLTVDTACSSGLYALHLGVQSILAGESAMSLVCGANTFITPESQALALSNGGFLSVDGKSYSFDEKANGYARGEGFGFVLLKPLEAAIRDKDVIRAVIRATGANQDGRTPSITQPSQQAQLDLLRDTYRVAGLDVADTDYVEAHGTGTPVGDPIEAAAIGEAFRDGRKSDRPLYVGSVKSNIGHLEGASGMAGVIKAVLALEKAVIPPIAMFEKTNPAIDTEYLQLAF…
Alternaria_tenuissima_ANJ_GCA_017589455.1	g7221	KS-AT-DH-MT-ER-KR-xCP	MKSEPIAIIGMSCRFPGGASEPARLWDVLSSGQSAWSEVPKDRFNMEAFHLKGDPHSSTTNTPGGHFLDSDVATFDCSFFEIKPTEARAMDPQQRLTLELAYEAFENAGFTVSQIWGSSTGVYIGQWSSDYSEIMARDPENQELYHTLGTGAAITSNRVSFFFNLRGPSFTVDTGCSASLVALHNAVQSLRSGESTMSLVGGVNVLLDPQRFTYQSKLKMFSPDGRSFSFDERANGYGRGEGCGCVVLKPLSLAIKDGNAIRAVIRNSALNQDGRTPQGISVPNGEAQEELIRRAYAEAGLVPAETDYVEAHGTGTAVGDPIEAKAIANVLARPREATQGPLIMGSVKGNIGHTESAAGIAGLIKSVLMLENQAVAPQVNYEKPNPKIPLHSWNLKIPT…
Alternaria_tenuissima_ANJ_GCA_017589455.1	g7717	KS-AT-DH-MT-ER-KR-xCP	MLYQSTNGTNGINGFHDRNGDNNVHGTNGHRSGDVQSTNSDDMSNSIAIVGISCKFGGAASNLDGLWHTLANGESCWSPIPKSRFDVSNTYHPDPLRTDSLHVKGGFFIDEDLTKFDAPFFNLTADAAKAMDPQLRLLLEGVYQATEDAGIPTEKLSGSNTSVFSASFGRDYTEMLMKDAEALPTSLVTGNGPAMFANRVSHFYNLRGPSVTVDTGCSGGLVALHMGVNSIRNRESDVSIVGASNAILNQDFFITISNLGLLHEDGQCYSMDHRWGGYGRGEGMAVLVLKKFSAAVKDGDHIHAVIRESAVNQDGRTGTITSPSMDAQRSLIQQCYSRAGIDLASTGYVEAHLTGTGGDAIEAEALARTFGKSREACDPVWVGSVKSNIGHTEPVSGLA…
Alternaria_tenuissima_ANJ_GCA_017589455.1	g11641	KS-AT-DH-MT-KR-xCP-C-A-xCP-Red	MSNLEPIAIVGSACRFPGDSDTPSKLWQLIKSPRDLLRQVPEERFDAEAFYHPDSKHHGTTNAIKSYFLDEDPALFDNGFFNIPQSEAEAVDPQQRLLMETVYDSLCAAGQTIEELRGSSTAVYVGLMCDDWAGILAQDPDVLPQYGATGMARSIMSNRISYFFDWHGPSMTIDTACSSSLVAVHQAIQTLRSGESQVAIAAGANLILTPGMYIAESKLSMLSPSGRSRMWDKDVDGYARGEGIAAVVLKPLSAAIRDNDHIECLIRGTGVNQDGRTNGITMPSATAQAALIRDTYARAGLDVNKPEDRPQFFHAHGTGTAAGDPQEAEAISKAFYSTNDCDETLYVGSIKTVIGHTEGTAGLASLISTSLALQHKVIPPNMHFNTLNPRLKPFYDHLE…
Alternaria_tenuissima_ANJ_GCA_017589455.1	g7421	KS-AT-DH-MT-KR-xCP-Red	MSPNTPINEPIAIIGSGCRFAGGASSPSKLWDLLRDPKDIRSNITDKRFNAEGFYHPDGTHHGHMNVMQSYLLDEDTRVFDAEFFGINPVEARAMDPQQRLLLEVVYESIESAGLSLDRMRGSDTAVFAGLMCGDYEAMMLRDLDQAPTHFATGTSRAVMSNRVSYFFDWRGPSVTIDTACSSSLVAVHQAIQTLRSGDSHTAVACGSNLIFGPEMYVIESKLKMLSPDSLSRMWDKDANGYARGEGVTAVVLKTLSQALADNDRIEAVVRETGVNSDGATPGITMPSASAQRDLIHSVYKKAGLNPLSAEDRPQFIEAHGTGTPAGDPIEAEALSTAFFSNTEKSSSPINTGSIKTVLGHTEGSAGIAALLKVTQAMQNSTIPPNLWFQQLNPKLEPF…
Alternaria_tenuissima_ANJ_GCA_017589455.1	g799	SAT-KS-AT-PT-xCP	MIRAKVLYFSGEIPQGDPEGDQQDLFRKLHLLSKERSYPILALFLETITRAVKEEQRRLIRTERDLIPAFESILDLTDHVVELRKTALGGAVERVLVLAFQLGSFIAYHEAHPLEYNFQSSDTFLIARGPGMLSAAAVALCPNVSMVPSIAGDIAKVAFRFGLVVDQVCRSLEISPDEINAAGAWIYCVYGIDPSEAQEAVALFNAEKKYAETSVASVFNDDGKSVSIGGPPSTLKTLFTECEFFKRTRNVPMKKVQGMWHTGKVYGTEHVQQVVPHIDEKHRLHLSLFSPVTGQPFEAANANELLEQIMEEMLTQRIRWDRTIQSVTERLKQVSPNSTQLIAIQPSQYVESLLAQWKADIPTATHTAKDMMSAIMNLPLGSSPAKDAKSSKIAVVGMA…
Alternaria_tenuissima_ANJ_GCA_017589455.1	g3441	SAT-KS-AT-PT-xCP-xCP-Te	MNVLIFGDQTADQYPLLRKACTWKNNSTLTTFLDRVSQVVREEVQKLPRTQRDQIPNFLTTWDLIEAYYAKGLKIPQLESCMVTIAQLAHFIGYYAENPSDLQNPANTRVVGLCTGLLAGSVVASARSLSELLPLATEAVRIAFRTGTVVGAAKEAVEQASAPKETWSTIVTNMTEKAAKDAIAAFHEEQQTPTLAQAYISAVSTMALTISGPPATTKRLLQGDAFKGCARVAIPVYAPYHAAHFYSPADIDQILDKDAIRHLQQFRPLSLVHSATTGKCHTATSTLDLIRSALTEILVEPVRWDNLLTEVVSQVTATSSQDCSVSAIGVTTITNSLVSALRNGGQSSVTARDHTTWVAAEHDSRGRTQNDKIAIVGMSGRFPGAANPDALWDLLEKGL…
Alternaria_tenuissima_FERA_1166_GCA_004156035.1	g6118	KS-AT-DH-ER-KR-xCP	MNDFVDPEGTFMPASSPNGLVPIAIVGFGFKFPQDITNAESLWKLLMERRSTMTEIPQNRWNIEGFYKEHGHRPGTVKNRGGHFLADDPARFDAPFFSVQPAEAECMDPQQRLLLETSYHALENAGIPMKAAMGTRTSVHVGCLLQEYSQISQRDSQMPGDYRIVGSSGLAMLANRLSWFYDFSGPSMTVDTACSGGLVAFHLACQELSAGSVDMSLVCGNNLCLLPDSTALLSSLNMMSKDSVCYSFDERASGYARGEGFGVLILKRLDTAIADGDTIRGVVRSTGCGQDGNTPSITSPSQSAQERLIRETYARAGLDLGDTRYFEAHGTGTPVGDPCEAAAISNVFSCRTPEDPIFVGALKSNMGHPEGASGIAGVIKTLLVLEKGIIPPNVYPERI…
Alternaria_tenuissima_FERA_1166_GCA_004156035.1	g3646	KS-AT-DH-KR-xCP	MVQVQGAELEFHSVNWTQHDVTTSDDVAIVGLSCRTAGGIENLDTLWDFLLQKKHASGEIPLNRWEPWRQRSALDAKIVSSITRKGYFLDDVEGFDAAFFGISPREAEHMDPHQRLGLELAYEALQNAGIQPDRLAGSDTAVYIGVDSDDYSRMVMEDLPAIEAWSGIGTAHHGVSNRISYHFDLKGPSAAVDAACASSLVALHLARQAIVSGESTVAICGGVNVICAPGITHMLQKAGALTEKGVCRSFDAAADGYARGEGGAIIVLKRLSAAQEDNDNILAVLKSSASAQDGKTRNIMAPNGAAQAEVARQALRRAGNIDPHTVNYVEAHATATRLGDPTEIKAMAEVYGEGRSREKPCYLGSIKPNVGHLEAAAGAISVVKTVLSVQKGVIAPQAL…
Alternaria_tenuissima_FERA_1166_GCA_004156035.1	g4242	KS-AT-DH-KR-xCP	MEPLCKCLRNRVSESRPERHCVEEAQCDPTSPSDVAIVGLSCRTAGGIDNLDTLWDFLLQKKHASGEIPPNRWEPWRQRSALDAKIVSSITRKGYFLDDVEGFDAAFFGISPREAEHMDPHQRLGLELAYEALQNAGIQPDRLAGSDTAVYIGVDSDDYSRMVMEDLPAIEAWSGIGTAHHGVSNRISYHFDLKGPSAAVDAACASSLVALHLARQAIVSGESTVAICGGVNVICAPGITHMLQKAGALTEKGVCRSFDAAADGYARGEGGAIIVLKRLSAAQEDNDNILAVLKSSASAQDGKTRNIMAPNGAAQADVARQALRRAGNIDPHTVNYVEAHATATRLGDPTEIKAMAEVYGEGRSREKPCYLGSIKPNVGHLEAAAGAISVVKTVLSVQK…
Alternaria_tenuissima_FERA_1166_GCA_004156035.1	g112	KS-AT-DH-MT-ER-KR-xCP	MEPIAIVGLAFKLPQDIDDEASFWHILEQGQSMMTEWPKSRVDVNAFARSPEASLNTLTSTRGHFLRQNLASFDAPFFSISSKEASAMDPQQRMLLETSYHALENAGIPLSSIAGTETGVFVGTMESDYHRMISKDPDDAPMTTATGISVSIMANRLSWYFDLKGPSMQLNTACSSSMIAVDLGCQSILSGQTSTVLVAGSSLMLDPEYSLYLSNMNMLSPDGICHSFDDRANGYSRGEGVIVMILKKLSTAISDGDNIRAVIRGTGSNQDGRTPGITQPSSVSQENLIRHTYRTCNLGFESTRYIEAHGTGTQIGDAMEMRALGAVFRTARSPKAPLFVGSVKTNIGHLEGGSGLAGIAKSILILEKGFIPPNALFERLNTKVNAKRNNIQVPESCIR…
Alternaria_tenuissima_FERA_1166_GCA_004156035.1	g2795	KS-AT-DH-MT-ER-KR-xCP	MTTDRTTPIAIIGMNMKFPGDAVSAQAFWELLMSARNVSKEIPSDRFNIDAFYHPDPNRLDSLRIRHAHFMEEDPRSFDAPFFNMSYAEASVLDPQQRGLLEGAYRTFENAGIPMETLSRSPTSVYCASFSRDGETITGRDFAAQSRYHATANGSSMLSNRVSHFFDLAGPSLTVDTACSSGLYALHLGVQSILAGESAMSLVCGANTFITPESQALALSNGGFLSVDGKSYSFDEKANGYARGEGFGFVLLKPLEAAIRDKDVIRAVIRATGANQDGRTPSITQPSQQAQLDLLRDTYRVAGLEVADTDYVEAHGTGTPVGDPIEAAAIGEAFRDGRKSDRPLYVGSVKSNIGHLEGASGMAGVIKAVLALEKAVIPPIAMFEKTNPAIDTEYLQLAF…
Alternaria_tenuissima_FERA_1166_GCA_004156035.1	g4998	KS-AT-DH-MT-ER-KR-xCP	MNKPVAIIGIAFRGPGDARDPEAFYRMLVEGRNARTKIPKDRYNVDAFYHPDAERLGSIQQRHAHFLQQDFKVFDAPFFSITPKEAKAMDPTHRILLEATYEGFENAGLSLEKVSGTQTSCYIGTFTADFPNLQARDNEGPSIYHATGMSASLASNRLSWFYNLRGPSLTVDTACSSSLTAFHLACQSIRTGEAEMSVVGGANLMFGPDMSILLGAAKILSPEGKSKMWDANANGFARGEGFGVTILKPLDAALRDGDNIRAVVLATAANEDGHTPGISLPNSEAQQELIRRAYQMAGVDPAETGYVEAHGTGTQAGDPLEARAILNTVGSVEGRRSDLYVGSVKTNIGHLEGAAGVAGIIKAALIVERGMIPPNLWFEKLNPEIDLPENVKIASKLTP…
Alternaria_tenuissima_FERA_1166_GCA_004156035.1	g5745	KS-AT-DH-MT-ER-KR-xCP	MLYQSTNGTNGINGFHDSNGDNNVHGTNGHRSGDVQSTNSDDMSNSIAIVGISCKFGGAASNLDGLWHILANGESCWSPIPKSRFDVSNTYHPDPLRTDSLHVKGGFFIDEDLTEFDAPFFNLTAEAAKAMDPQLRLLLEGVYQATEDAGIPTEKLSGSNTSVFSASFGRDYTEMLMKDADALPTSLVTGNGPAMFANRVSHFYNLRGPSVTVDTGCSGGLVALHMGVNSIRNQESDVSIVGASNAILNQDFYIAISNLGLLHEDGKCYSMDHRWGGYGRGEGMAVLVLKKFSAAVKDGDHIHAVIRESAVNQDGRTGTITSPSMDAQRSLIQQCYSRAGIDLASTGYVEAHLTGTGGDAIEAEALARTFGKSREACDPVWVGSVKSNIGHTEPVSGLA…
Alternaria_tenuissima_FERA_1166_GCA_004156035.1	g150	KS-AT-DH-MT-KR-xCP-C-A-xCP-Red	MSNLEPIAIVGSACRFPGDSDTPSKLWQLIKSPRDLLRQVPEERFDAEAFYHPDSKHHGTTNAIKSYFLDEDPALFDNGFFNIPQSEAEAVDPQQRLLMETVYDSLCAAGQTIEELRGSSTAVYVGLMCDDWAGILAQDPDVLPQYGATGMARSIMSNRISYFFDWHGPSMTIDTACSSSLVAVHQAIQTLRSGESQVAIAAGANLILTPGMYIAESKLSMLSPSGRSRMWDKDVDGYARGEGIAAVVLKPLSAAIRDNDHIECLIRGTGVNQDGRTNGITMPSATAQAALIRDTYARAGLDVNKPEDRPQFFHAHGTGTAAGDPQEAEAISKAFYSTNDCDETLYVGSIKTVIGHTEGTAGLASLISTSLALQHKVIPPNMHFNTLNPRLKPFYDHLE…
Alternaria_tenuissima_FERA_1166_GCA_004156035.1	g1389	KS-AT-DH-MT-KR-xCP-Red	MNEPIAIIGSGCRFAGGASSPSKLWDLLRDPKDIRSNITDKRFNAEGFYHPDGTHHGHMNVMQSYLLDEDTRVFDAEFFGINPVEARAMDPQQRLLLEVVYESIESAGLSLDRMRGSDTAVFAGLMCGDYEAMMLRDLDQAPTHFATGTSRAVMSNRVSYFFDWRGPSVTIDTACSSSLVAVHQAIQTLRSGDSHTAVACGSNHIFGPEMYVIESKLKMLSPDSLSRMWDKDANGYARGEGVTAVVLKTLSQALADNDRIEAVVRETGVNSDGATPGITMPSANAQRDLIHSVYKKAGLNPLSAEDRPQFIEAHGTGTPAGDPIEAEALSIAFFSNTEKSSSPINTGSIKTVIGHTEGSAGIAALLKVTQAMQNSTIPPNLWFQQLNPKLEPFYGNLQI…
Alternaria_tenuissima_FERA_1166_GCA_004156035.1	g8603	KS-AT-DH-xCP-xCP-MT	MRSQSSHFAPSVAFFCPQSKAPTEAYLEQLQRYIVETPLLQPFAEAITSLRDTWNTLCKGHADIANLKSGERHVVSLERWMTNGIAGPVSSSMSGILALPLLVVIQICQYFQLLELHKLTHEQMLSSLRNGGGAQGYCGGLPTAFAISCAKDEEDVVRLATKALRLAFAVGAFGELGDDESIEGATTIAVRLRASQQGEELVEGIPGCYISAITDPRTISIVGPVIELMKVADRARDQGLLVTDIHIRGKVHNPENAPLVKVLFDLCQEHDEMTLPDASQLRVPVRSNLNGKLLDNCSLTYEAINTILASRCEWYRLLKEVAQDLAGSGTDSHTFALFGIGDPVPLMPFHNARLRVAKVEAHTAIQEARLAEYKYPEDAIAVTGVSCRLPRANDLEELW…
Alternaria_tenuissima_FERA_1166_GCA_004156035.1	g10768	SAT-KS-AT-PT-xCP	MIRAKVLYFSGEIPQGDPEGDQQDLFRKLHLLSKERSHPILALFLETITRAVKEEQRQLIRTERDLIPAFESILDLTDHVIELRKTALGGAVERVLVLAFQLGSFIAYHEAHPLEYNFQSSDTFLIARGPGMLSAAAIALCPNVSMVPSIAGDIAKVAFRFGLVVDQVCRSLEISPDEINAAGAWIYCVYGVDPSEAQEAVALFNAEKEYAETSVASVFNDDGKSVSIGGPPSTLKTLFTECEFFKRTRNVPMKKVQGMWHTGKVYGMEHVQQVVPHIDEKHRLHLSLFSPVTGQPFEAANANELLEQIMEEMLTQRIRWDRTIQSVTERLKQVSPNSTQLIAIQPSQYVESLLAQWKADIPTATYTAKDMMSAIMNLPLGSSPAKDAKSSKIAVVGMA…
Alternaria_tenuissima_FERA_1166_GCA_004156035.1	g11042	SAT-KS-AT-PT-xCP-xCP-Te	MNVLIFGDQTADQYPLLRKACTWKNNSTLTTFLDRVSQVVREEVQKLPRTQRDQIPNFLTTWDLIEAYYAKGLKIPQLESCMVTIAQLAHFIGYYAENPSDLQNPANTRVVGLCTGLLAGSVVASARSLSELLPLATEAVRIAFRTGTVVGAAKEAVEQASAPKETWSTIVTNMTEKAAKDAIAAFHEEQQTPTLAQAYISAVSTMALTISGPPATTKRLLQGDAFKGCARVAIPVYAPYHAAHFYSPADIDQILDKDAIRHLQQFRPLSLVHSATTGKCHTATSTLDLIRSALTEILVEPVRWDNLLTEVVSQVTATSSQDCSVSAIGVTTITNSLVSALRNGGQSSVTARDHTTWVAAEHDSRGRTQNDKIAIVGMSGRFPGAANPDALWDLLEKGL…
Alternaria_triticina_DAOMC238612_GCA_040583995.1	g3473	KS-AT-DH-ER-KR-xCP	MNTSPDSKEPPMVPSSQPSGVEPIAIVGFGFKFPQDITDAQSLWKLLMERRSTMTEIPKNRWNIDGFYKEHGHRPGTVKNRGGHFLADDPARFDAPFFSIQPAEAECMDPQQRLLLETSYHALENAGIPMQAAIGTRTSVHVGCLLQEYSQISQRDAQMPGDYRIVGSSGLAMLANRLSWFYDFSGPSMTVDTACSGGLVALHLACQELLAGSVDMSLVGGNNLCLLPDSTALLSSLNMMSKDSVCYSFDERASGYARGEGFGVLILKRLDKAIADGDTIRGVIRSTGCGQDGNTPSITSPSQSAQQRLIRETYARAGLDLGDTRYFEAHGTGTPVGDPCEAAAINHVFSSRTPEDPIFVGALKGNMGHPEGASGIAGVIKSLLVLEKGIIPPNVYPER…
Alternaria_triticina_DAOMC238612_GCA_040583995.1	g9408	KS-AT-DH-ER-KR-xCP	MVINESGHEDYGLNQRASAVSAAPKPRRYTQEPIAVVGMGCRLPGDSNSPHALWDFLERGGIADNTPPQSRFRLDTHHDGSKKPKTMRSPGGMFLENIDPKKFDAAFFSTGKLDAIAMDPQQRQLLEVVYECLENAGIPLEKLDGEAIGCFVGSYGVDYADMQARDPDDRAPSVTIGVGRAILSNRISHFLNIHGPSMTIDTACSGSLVGVDVACRYLSSGEIDGALVAGANLYFNPEHNMDSGPMKGASSLSGRCHTFDKKADGYIKGEAINCVMLKRLCDAERDGDPIRAIIRGTSTNSDGKTPGIASPSSEAQAKATRAAYANAGISDLSATGYIEMHGTGTQAGDPQEVKGVASVFSSSRPENAPLIMGSIKSNVGHSEPAAGISGLMKAIMSVE…
Alternaria_triticina_DAOMC238612_GCA_040583995.1	g7752	KS-AT-DH-KR-xCP	MDTPDSNQSSYNTSSPVQMYSSVTESELRILSELNDVAVIGMACRVAGGNNSPEQLWESILAKRDTSSEIPAMRWEPYRHRDVRNVKALDNTTSRGYYLDALEDFDASFFGISPKEAEQMDPQQRISLEVAWEALESAGIDPKKLSGSDTAVFMGVNSDDYGKLVLEDLPNIEPWLGKVFYDSWSTYALCDLDVLVLTPRTGIGTAYCGIPNRISYHLNLKGPSTAVDAACASSLVAIHHGRQAILLEESKIAITGGVNAICGPGLTRVLDKAGAISPDGSCLSFDDNAHGYGRGEGAAVVVLKRFRDAIRDGDNVIALLKGSAVAQDGKTNGIMAPNAKAQELVARKALKQANVDPATVEYVEAHATSTPLGDPTEVSAISAVYGVLRSKPVNVGSVK…
Alternaria_triticina_DAOMC238612_GCA_040583995.1	g10762	KS-AT-DH-MT-ER-KR-xCP	MPLYYTDTTPTNGIPDMNGVPSDAPPRPKSDDLSNAIAIVGISCKFGGSASNLDGLWHTLSSGESCWSPVPKSRFDISKTSHPDSQQTDSLHVKGGFFIEEDLTEFDAPFFNLTAEVAKSMDPQLRIMLEGVYNATESAGIPIEKLSGSNTSVYSATFGRDYAEMLMKDADSMPTSLVTGNGPAMFANRVSHFYNLMGPSVTVDTGCSGGLVALHMGVNSIRNEESEVSIIGASNAILNQDFYIAISNLGLLHEDGKCYSMDHRFGGYGRGEGMAVLVLKKYSAAVRDGDHIHALIRESAVNQDGRTGTITSPSMDAQQQLIKQCYSRAGIDLSSTGYVEAHGTGTGGDAIEAEALALTFGNSREKFDPIWVGSVKSNIGHTEPVSGLAAVIKAALILR…
Alternaria_triticina_DAOMC238612_GCA_040583995.1	g11194	KS-AT-DH-MT-ER-KR-xCP	MARSEDPEPMAIVGMGCRWAGGVRNPTDLWELLLNKRSGYQDWAAPRFSAEGFYHPNPERPGTTAAKGGYVVTEDPRLFDPSFFGISGLEAETIDPSQRKLLEVVYEALESAGETWESVNGTRMGVYVADISYDNSYAQTRDWEYARPHATTGVCHNILSNRINYVFNLRGPSVTLDSACTSAMYGLHMAIQAIRDGDCDSAIVATANYIMDPSMQIAMDKLGALSGTSMSHAFDAAADGYARGEGFAAIYVKKPQQAMQDGNPIRALVRGSAIGANGRSSGITHPSGTAQEDIIRKAYHNAGNLSPSETPFLECHGTGTRVGDPLEVEAAGKVFGPGRSSSEEDRLFIGSVKTNLGHTEGAAALAGIFKVVLALEAGVIPPSIGVTTLNPRIDFDKAK…
Alternaria_triticina_DAOMC238612_GCA_040583995.1	g11232	KS-AT-DH-MT-ER-KR-xCP	MATTDKTTPIAIIGMNMKFPGDAVSVSSFWELIMSARNVSKEIPADRFNIDAFYHPDPNRLDSLRIRHAHFMEEDPRSFDAPFFNMSYAEASVLDPQQRGLLEGAYRTFENAGIPMETLSRSPTSVYCASFSRDGETITGRDFSAQSRYHATANGSSMLSNRISHFFDLAGPSLTVDTACSSGLYALHLGAQSILAGESKMSLVCGANTFITPESQALALSNGGFLSVDGKSYSFDAKANGYARGEGFGFVLLKPLDAALRDGDVIRAVIRATGANQDGRTPSITQPSQQAQLDLLRDTYRVAGLNVADTDYVEAHGTGTPVGDPIEAAAVGQAFRDGRKVDRPLFMGSVKANIGHLEGASGMAGVIKAVLALENAVIPPIAMFEKPNPAIDVAGLQLA…
Alternaria_triticina_DAOMC238612_GCA_040583995.1	g11805	KS-AT-DH-MT-ER-KR-xCP	MAYEDTKPMPIAIVGFGCRFPGDVTNGEKLWQMLVEKKSARTEVPPDRFNVDAFYNPDGDRFGTCNNRGGHYLAEDVSLFDAPFFSISPAEAMAMDPMQRLLLEVTYEALENSGTPLARVSGSQTSCYVGCFTKDYEEMQRRDMELAPKYQSTGASQTMLSNRLSYFFNLKGPSVSIDTACSSGLVAVHLACQSLRSGESSMAIAGGSNLILSPDIQIEMSDMHFLSPDSISHAFDDRANGYARGEGVGAIILKPLDLAIRDNDPIRAIIRGTAASSDGRTPGITMPSKDAQVDLIRSAYRAAGIDVSETGYFEAHGTGTAAGDPIESGAIGEVFATSRPHRISATTEEVVPLSIGSVKTNMGHLEGASGIAGLIKALLSVEKGMIAPNLWFERGNPAI…
Alternaria_triticina_DAOMC238612_GCA_040583995.1	g2103	KS-AT-DH-MT-ER-KR-xCP	MNKPIAIIGISFRGPGDARDPEAFYRMLVEGRSARTEIPKDRYNVDAFYHPDPERLGSIQQRHAHFLEQDFKVFDAPFFSITPKEAKAMDPTHRILLEATYEGFENAGLTLEQVSGTQTSCYIGTFTADFPNLQARDNEGPSIYHATGMSASLASNRLSWFYNLRGPSLTVDTACSSSLTAFHLACQSIRTGEAEMSVVGGANLMFGPDMSILLGAAKILSPEGKSKMWDADANGFARGEGFGVTILKPLDAAIRDGDNIRAVVLATAANEDGRTPGISLPNSEAQQELIRTAYRQAGVDPAETGYVEAHGTGTQAGDPLEARAILKTIGSVENRSSDLYVGSVKTNIGHLEGAAGVAGIIKAALTVERGMILPNLWFEKLNPDINLPENVKIASKLTP…
Alternaria_triticina_DAOMC238612_GCA_040583995.1	g7451	KS-AT-DH-MT-ER-KR-xCP	MEPIAIVGLSYKLPEGDNEDHSFWDNLQRGRSLSRPWPKSRGNIDAFYSSNVAMDNTVYSTNAHFVKEDPAAFDAAFFSITSKEAASMDPQQRWLLETSYKALENAGNPPETLAGSQTAVFAASMSDDYSRILARDPDEAPTNTATGTSPSILANRLSWYFDFKGPSIQLNTACSTSMIAMDLACQSLRSGQSSMALVAGANVLLSVEISLYLSNMQMLSPDGVSYSFDHRANGYARGEGAVVLVLKRLSDAIRDSDVIRAVVRATGSNQDGRTPGITQPSAESQEQLIRHVYKSCNLGFESTRYVEAHGTGTQLGDATEMKAIGRTFRASRSQKHPLYVGSVKSNIGHLEGCSGLAGILKSIMMLEMGVIPPSALFEKISPKINAKIYNVEVPTKCIA…
Alternaria_triticina_DAOMC238612_GCA_040583995.1	g302	KS-AT-DH-MT-KR-xCP-C-A-xCP-Red	MTAHRDASHGNAEPIAVIGSGMRFPGSSNNSSKLWELLLNPRDLLKRIPEDRFNIDNFYHPDPNHHATTDVRESYFLDEDHRHFDAGFFNIKPVEVAAIDPQQRLLMEVVYESLEAAGIPLKSMIGSRTGVYVGLMCADYHDHLHKDVDTLPTYAPTGTARSIMSNRISYFFDWHGPCMTIDTACSSSLVAVHQAVQLLRSGDSDVAVAAGVNMILGSGQYIAESSLHMLSADSRSRMWDADASGYARGEGVASVILKRLSTAIADGDKIECIIRESGVNQDGRTKGITMPSASAQMDLIEQTYKKAGLDPKDPNQRCQYFEAHGTGTAAGDPKEAEAISKAFFHPGDSTSHKGDPLYVGSIKTVIGHTEGTAGLAGLLKASLAVQHGVIPPNLLFNKL…
Alternaria_triticina_DAOMC238612_GCA_040583995.1	g10444	SAT-KS-AT-DH-xCP-xCP-MT	MRTQSDHFAPSVAFFCPQSKAPTEAYLEQLQKYIVETPLLLPFAEAITSLTDTWTILCDGHPDIAKLKSGKRHVVSLKRWITDGISGPVSSSMSGILALPLLVVIQICQYFQLLELHGLTHERMLASLKKGGGAQGYCGGLPTAFAVSCAKDEEEVVHLATKALRLAFAVGTFGELGDDELVEGATTIAVRLRTPPQGDELVAGIPRCYISAITDPKTISIVGPVLELEKVAKRARNRGLLVTDIHIRGKVHNPENAPLVKVLFDICREHDDMMLPDASQLRVPVRSNLDGSLLHDCSLTHEAINTILASRCEWYRLLKDVAQDLAGSGTDAHTFALFGIGDPVPLMPFHNARLRISKMEVHTTVQGARLAEYKYPEDAIAITGVSCRLPRAADLEELW…
Alternaria_triticina_DAOMC238612_GCA_040583995.1	g1095	SAT-KS-AT-PT-xCP-xCP-Te	MNVLIFGDQTADQYPLLRKACTWKNNSTLTSFLDRVSQVVREEVQKLPRTQRDQIPNFLTTWDLIEAYYAKGLKVPQLESCMVTIAQLSHYIGYYAENPSDLKNPANTRVVGLCTGLLAGSVVASARSLSELLPLAIEAVRVAFRTGTVVGAAKEALEQTPVPKETWSTIVTSISEKAATDAITAFHQEQRIPTLAQAYISAVSTMALTISGPPSTTKRLLQSDAFKGCTRVSIPVYAPYHAAHLYTEADIDQILDKDATRHLQQFRPLSLVHSASTGECHTATSTLDLIRTALSEILVESVRWDNLLSEVVSQVTATSSQDCSVSAIGVTSITNSLVSALKSGGQSSVTARDHTSWVAAEHDSRGRTQNDKIAIVGMSGRFPGAANPDALWDLLEKGL…
Alternaria_ventricosa_BMP_2768_GCA_023758065.1	g4440	KS-AT-DH-ER-KR-xCP	MVINESGHEDYGLNQRASAVSAAPKPRRYTQEPIAVVGMGCRLPGDSNSPHALWDFLERGGIADNTPPQSRFRLDTHHDGSKKPKTMRSPGGMFLENIDPKKFDAAFFSTGKLDAIAMDPQQRQLLEVVYECLENAGIPLEKLDGEAIGCFVGSYGVDYADMQARDPDDRAPSVTIGVGRAILSNRISHFLNIHGPSMTIDTACSGSLVGVDVACRYLSSGEIDGALVAGANLYFNPEHNMDSGPMKGASSLSGRCHTFDKKADGYIKGEAINCVMLKRLCDAERDGDPIRAIIRGTSTNSDGKTPGIASPSSEAQAKATRAAYANAGISDLSATGYIEMHGTGTQAGDPQEVKGVASVFFSSRPENAPLIMGSIKSNVGHSEPAAGISGLMKAIMSVE…
Alternaria_ventricosa_BMP_2768_GCA_023758065.1	g6887	KS-AT-DH-ER-KR-xCP	MNTSPDSKEPSMAPLSQPSGVEPIAIVGFGFKFPQDITDAQSLWKLLMERRSTMTDIPKNRWNIDGFYKEHGHRPGTVKNRGGHFLADDPARFDAPFFSIQPAEAECMDPQQRLLLETSYHALENAGIPMQAAIGTRTSVHVGCLLQEYSQISQRDAQMPGDYRIVGSSGLAMLANRLSWFYDFSGPSMTVDTACSGGLVALHLACQELLAGSVDMSLVGGNNLCLLPDSTALLSSLNMMSKDSVCYSFDERASGYARGEGFGVLILKRLDKAIADGDTIRGVIRSTGCGQDGNTPSITSPSQSAQERLIRETYARAGLDLGDTRYFEAHGTGTPVGDPCEAAAINNVFSSRTPEDPIFVGALKGNMGHPEGASGIAGVIKSLLVLEKGIIPPNVYPER…
Alternaria_ventricosa_BMP_2768_GCA_023758065.1	g3526	KS-AT-DH-KR-xCP	MDTPDSNQYSSDSSSPVQMHSSVTESELGELGELNDIAVIGMACRVAGGNHSPEQLWESILAKRDASSEIPAMRWEPYRHRDVRNIKALDNTTSRGYYLDALEDFDAGFFGISPKEAEQMDPQQRISLEVAWEALESAGIDPKKLSGSDTAVFMGVNSDDYGKLLLEDLPNIEPWLGKVFYDYWSTYALCDLEVPVLIPRTGIGTAYCGIPNRISYHLNLMGPSTAVDAACASSLVAIHHGRQAILCGESEIAITGGVNAICGPGLTRVLDKAGAISPDGSCLSFDDNAHGYGRGEGAAVVVLKRFRDAIRDGDNVIALLKGSAVAQDGKTNGIMAPNAKAQELVARKALKQANVDPATVEYVEAHATSTPLGDPTEVSAISAVYGVSRSKPVNVGSVK…
Alternaria_ventricosa_BMP_2768_GCA_023758065.1	g10806	KS-AT-DH-MT-ER-KR-xCP	MARSEDPEPMAIVGMGCRWAGGVRNPTDLWELLLNKRSGYQDWAAPRFSAEGFYHPNPERPGTTAAKGGYVVTEDPRLFDPSFFGISGLEAETIDPSQRKLLEVVYEALESAGETWESVNGTRMGVYVADISYDNSYAQTRDWEYARPHATTGVCHNILSNRINYVFNLRGPSVTLDSACTSAMYGLHMAIQAIRDGDCDSAIVATANYIMDPSMQIAMDKLGALSGTSMSHAFDAAADGYARGEGFAAIYVKKPQQAMQDGNPIRALVRGSAIGANGRSSGITHPSGTAQEDIIRKAYHNAGNLSPSETPFLECHGTGTRVGDPLEVEAAGKVFGPGRSSSEEDRLFIGSVKTNLGHTEGAAALAGIFKVVLALEAGVIPPSIGVTTLNPRIDFDKAK…
Alternaria_ventricosa_BMP_2768_GCA_023758065.1	g10845	KS-AT-DH-MT-ER-KR-xCP	MATTDKTTPIAIIGMNMKFPGDAVSASSFWELIMSARNVSKEIPADRFNIDAFYHPDPNRLDSLRIRHAHFMEEDPRSFDAPFFNMSYAEASVLDPQQRGLLEGAYRTFENAGIPMETLSRSPTSVYCASFSRDGETITGRDFSAQSRYHATANGSSMLSNRISHFFDLAGPSLTVDTACSSGLYALHLGAQSILAGESKMSLVCGANTFITPESQALALSNGGFLSVDGKSYSFDAKANGYARGEGFGFVLLKPLDAALRDGDVVRAVIRATGANQDGRTPSITQPSQQAQLDLLRDTYRVAGLNVEDTDYVEAHGTGTPVGDPIEAAAVGQAFRDGRKVDRPLYMGSVKANIGHLEGASGMAGVIKAVLALENAVIPPIAMFEKPNPAIDVADLQLA…
Alternaria_ventricosa_BMP_2768_GCA_023758065.1	g2066	KS-AT-DH-MT-ER-KR-xCP	MNKPIAIIGISFRGPGDARDPEAFYRMLVEGRSARTEIPKDRYNVDAFYHPDPERLGSIQQRHAHFLEQDFKVFDAPFFSITPKEAKAMDPTHRILLEATYEGFENAGLTLEQVSGTQTSCYIGTFTADFPNLQARDNEGPSIYHATGMSASLASNRLSWFYNLRGPSLTVDTACSSSLTAFHLACQSIRTGEAEMSVVGGANLMFGPDMSILLGAAKILSPEGKSKMWDADANGFARGEGFGVTILKPLDAAIRDGDNIRAVVLATAANEDGRTPGISLPNSEAQQELIRTAYRQAGVDPAETGYVEAHGTGTQAGDPLEARAILKTIGSVENRSSDLYVGSVKTNIGHLEGAAGVAGIIKAALTVERGMILPNLWFEKLNPDINLPENVKIASKLTP…
Alternaria_ventricosa_BMP_2768_GCA_023758065.1	g5511	KS-AT-DH-MT-ER-KR-xCP	MEPIAIVGLSYKLPEGDNEDHSFWDNLQRGRSLSRPWPKSRGNIDAFYSSNVAMDNTVYSTNAHFVKEDPAAFDAAFFSITSKEAASMDPQQRWLLETSYKALENAGNPPETLAGSQTAVFAASMSDDYSRILARDPDEAPTNTATGTSPSILANRLSWYFDFKGPSIQLNTACSTSMIAMDLACQSLRSGQSSMALVAGANVLLSVEISLYLSNMQMLSPDGVSYSFDHRANGYARGEGAVVLVLKRLSDAIRDSDVIRAVVRATGSNQDGRTPGITQPSAESQEQLIRHVYKSCNLGFESTRYVEAHGTGTQLGDATEMKAIGRTFRASRSQKHPLYVGSVKSNIGHLEGCSGLAGILKSIMMLEMGVIPPSALFEKISPKINAKIYNVEVPTKCIA…
Alternaria_ventricosa_BMP_2768_GCA_023758065.1	g6355	KS-AT-DH-MT-ER-KR-xCP	MAYEDTKPMPIAIVGFGCRFPGDVTNGEKLWQMLVEKKSAGTEVPPDRFNVDAFYNPDGDRFGTCNNRGGHYLAEDVSLFDAPFFSISPAEAMAMDPMQRLLLEVTYEALENSGTPLARVSGSQTSCYVGCFTKDYEEMQRRDMELAPKYQSTGASQTMLSNRLSYFFNLKGPSVSIDTACSSGLVAVHLACQSLRTGESSMAIAGGSNLILSPDIQIEMSDMHFLSPDSISHAFDDRANGYARGEGVGAIILKPLDLAIRDNDPIRAIIRGTAASSDGRTPGITMPSKDAQVDLIRSAYRAAGIDVSETGYFEAHGTGTAAGDPIESGAIGEVFATSRPHRISATTEEVVSLSIGSVKTNMGHLEGASGIAGLIKAMLSVEKGVIAPNLWFQRGNPAI…
Alternaria_ventricosa_BMP_2768_GCA_023758065.1	g9677	KS-AT-DH-MT-ER-KR-xCP	MPLYYTDTTPTNGIPDMNGVPSDAPPRPKSDDLSNAIAIVGISCKFGGSASNLDGLWHTLSSGESCWSPVPKSRFDISKTSHPDSQQTDSLHVKGGFFIEEDLTEFDAPFFNLTAEVAKSMDPQLRIMLEGVYNATESAGIPIEKLSGSNTSVYSATFGRDYAEMLMKDADSMPTSLVTGNGPAMFANRVSHFYNLMGPSVTVDTGCSGGLVALHMGVNSIRNEESEVSIIGASNAILNQDFYIAISNLGLLHEDGKCYSMDHRFGGYGRGEGMAVLVLKKYSAAVRDGDHIHALIRESAVNQDGRTGTITSPSMDAQQQLIKQCYSRAGIDLSSTGYVEAHGTGTGGDAIEAEALALTFGNSREKFDPIWVGSVKSNIGHTEPVSGLAAVIKAALILR…
Alternaria_ventricosa_BMP_2768_GCA_023758065.1	g8991	KS-AT-DH-MT-KR-xCP-C-A-xCP-Red	MTAHRDASHGNAEPIAVIGSGMRFPGSSNNSSKLWELLLNPRDLLKRIPEDRFNIDNFYHPDPNHHATTDVRESYFLDEDHRHFDAGFFNIKPVEVAAIDPQQRLLMEVVYESLEAAGIPLESMIGSRTGVYVGLMCADYHDHLHKDVDTLPTYAPTGTARSIMSNRISYFFDWHGPCMTIDTACSSSLVAVHQAVQLLRSGDSDVAVAAGVNMILGSGQYIAESSLHMLSADSRSRMWDADASGYARGEGVASVILKRLSTAIADGDKIECIIRESGVNQDGRTKGITMPSASAQMDLIEQTYKKAGLDPKDPNQRCQYFEAHGTGTAAGDPKEAEAISKAFFHPGDSTSHKGDPLYVGSIKTVIGHTEGTAGLAGLLKASLAVQHGVIPPNLLFNKL…
Alternaria_ventricosa_BMP_2768_GCA_023758065.1	g5406	SAT-KS-AT-DH-xCP-xCP-MT	MRTQSDHFAPSVAFFCPQSKAPTEAYLEQLQKYIVETPLLLPFAEAITSLTDTWTILCDGHPDIAKLKSGKRHVVSLKRWITDGISGPVSSSMSGILALPLLVVIQICQYFQLLELHGLTHERMLASLKKGGGAQGYCGGLPTAFAVSCAKDEEEVVHLATKALRLAFAVGAFGELGDDELVEGATTIAVRLRTPRQGDELVAGIPRCYISAITDPKTISIVGPVLELEKVAERARNRGLLVTDIHIRGKVHNPENAPLVKVLFDICQEHDDMMLPDASQLRVPVRSNLDGSLLHDCSLTHEAINTILASRCEWYRLLKDVAQDLAGSGTDAHTFALFGIGDPVPLMPFHNARLRISKMEVHTTVQGARLAEYKYPEDAIAITGVSCRLPRAADLEELW…
Alternaria_ventricosa_BMP_2768_GCA_023758065.1	g405	SAT-KS-AT-PT-xCP-xCP-Te	MNVLIFGDQTADQYPLLRKACTWKNNSTLTSFLDRVSQVVREEVQKLPRTQRDQIPNFLTTWDLIEAYYAKGLKVPQLESCMVTIAQLSHYIGYYAENPSDLKNPANTRVVGLCTGLLAGSVVASARSLSELLPLAIEAVRVAFRTGTVVGAAKEALEQTPVPKETWSTIVTSISEKAATDAITAFHQEQRIPTLAQAYISAVSTMALTISGPPSTTKRLLQSDAFKGCTRVSIPVYAPYHAAHLYTEADIDQILDKDATRHLQQFRPLSLVHSASTGECHTATSTLDLIRTALSEILVESVRWDNLLSEVVSQVTASSSQDCSVSAIGVTSITNSLVSALKSGGQSSVTARDHTSWVAAEHDSRGRTQNDKIAIVGMSGRFPGAANPDALWDLLEKGL…
Alternaria_viburni_BMP_2772_GCA_023758015.1	g2435	KS-AT-DH-ER-KR-xCP	MSTSADSEQPSMAPLSQPSGVEPIAIVGFGFKFPQDITDAQSLWKLLMERRSTMTEIPKNRWNIDGFYKEHGHRPGTVKNRGGHFLADDPARFDAPFFSIQPAEAECMDPQQRLLLETSYHALENAGIPMQAAIGTRTSVHVGCLLQEYSQISQRDAQMPGDYRIVGSSGLAMLANRLSWFYDFSGPSMTVDTACSGGLVALHLACQELLAGSVDMSLVGGNNLCLLPDSTALLSSLNMMSKDSVCYSFDERASGYARGEGFGVLILKRLDKAIADGDTIRGVIRSTGCGQDGNTPSITSPSQSAQERLIRETYARAGLDLGDTRYFEAHGTGTPVGDPCEAAAINNVFSSRTPEDPIFVGALKGNMGHPEGASGIAGVIKSLLVLEKGIIPPNVYPER…
Alternaria_viburni_BMP_2772_GCA_023758015.1	g5098	KS-AT-DH-KR-xCP	METPDSDQYSSSSFSPVPVHNSVTEAELGELGECNDVAVVGMACRVAGGNHSPEQLWESILAKRDASSEIPAMRWEPYRHRDVRNIKALDEATSRGYYLDALEDFDPSFFGISPKEAEQMDPQQRISLEVAWEALESAGIDPKKLSGTDTAVFMGVNSDDYGKLLLEDLPNIEPWLGIGTAYCGIPNRISYHLDLMGPSTAVDAACASSLVAIHHGRQAILLGESKMAITGGVNAICGPGLTRVLDKAGAISPDGSCLSFDDNAHGYGRGEGAAIVVLKRFRDAIRDGDNVIAILKGSAVAQDGKTNGIMAPNAKAQELVARQALKRANVNPATVEYVEAHATSTPLGDPTEVSAISAVYGVSRSKPVNVGSVKPNVGHLEAGAGAIGFIKAVLALNKA…
Alternaria_viburni_BMP_2772_GCA_023758015.1	g11023	KS-AT-DH-MT-ER-KR-xCP	MPLYYTDTTPTNGIPDMNGVPSDAPPQPKSDDMSNAIAIVGISCKFGGSASNLDGLWHTLSSGESCWSPVPKSRFDISKTSHPDSQRTDSLHVKGGFFIEDDLTEFDAPFFNLTAEVAKSMDPQLRLMLEGVYNATESAGLPIEKLSGSNTSVYSATFGRDYAEMLMKDADSMPTSLVTGNGPAMFANRVSHFYNLMGPSVTVDTGCSGGLVALHMGVNSIRNQESEVSIIGASNAILNQDFYIAISNLGLLHEDGKCYSMDHRFGGYGRGEGMAVLVLKKYSAAVRDGDHIHALIRESAVNQDGRTGTITSPSMDAQQQLIKQCYSRAGIDLSSTGYVEAHGTGTGGDAIEAEALALTFGNSREKFDPIWVGSVKSNIGHTEPVSGLAAVIKAALILR…
Alternaria_viburni_BMP_2772_GCA_023758015.1	g1202	KS-AT-DH-MT-ER-KR-xCP	MNKPIAIIGISFRGPGDARDPEAFYRMLVEGRSARTEIPKDRYNVDAFYHPDPERLGSIQQRHAHFLEQDFKVFDAPFFSITPKEAKAMDPTHRILLEATYEGFENAGLTLEQVSGTQTSCYIGTFTADFPNLQARDNEGPSIYHATGMSASLASNRLSWFYNLRGPSLTVDTACSSSLTAFHLACQSIRTGEAEMSVVGGANLMFGPDMSILLGAAKILSPEGKSKMWDADANGFARGEGFGVTILKPLDAAIRDGDNIRAVVLATAANEDGRTPGISLPNSEAQQELIRTAYRQAGVDPAETGYVEAHGTGTQAGDPLEARAILKTIGSGENRLSDLYVGSVKTNIGHLEGAAGVAGIIKAALTVERGMILPNLWFEKLNPDIDLPKNVKIASKLTP…
Alternaria_viburni_BMP_2772_GCA_023758015.1	g3445	KS-AT-DH-MT-ER-KR-xCP	MEPIAIVGLSYKLPEGDNEDHGFWDNLERGRSLSRPWPKSRGNIDAFYSSNVAMDNTVYSTNAHFVKEDPAAFDAAFFSITSKEAASMDPQQRWLLETSYKALENAGIPPETLAGSQTAVFAASMSDDYSRILARDPDEAPTNTATGTSPSILANRLSWYFDFKGPSIQLNTACSTSMIAMDLACQSLRSGQSSMALLAGANVLLSVEISLYLSNMQMLSPDGVSYSFDHRANGYARGEGAVVLVLKRLSDAIRDSDVIRAVVRATGSNQDGRTPGITQPSAESQEQLIRHVYKSCNLGFESTRYVEAHGTGTQLGDATEMKAIGRTFRASRSQKHPLYVGSVKSNIGHLEGCSGLAGILKSIMILEMGVIPPSALFEKISPKINAKIYNVEVPTKCIP…
Alternaria_viburni_BMP_2772_GCA_023758015.1	g4796	KS-AT-DH-MT-ER-KR-xCP	MATTDKTTPIAIIGMNMKFPGDAVSASAFWKLILSARNVSKEIPADRFNIDAFYHPDPNRLDSLRIRDAHFMEEDPRSFDAPFFNMSYAEASVLDPQQRGLLEGAYRTFENAGIPMETLSRSPTSVYCASFSRDGETITGRDFSAQSRYHATANGSSMLSNRISHFFDLAGPSLTVDTACSSGLYALHLGAQSILAGESKMSLVCGANTFITPESQALALSNGGFLSVDGKSYSFDAKANGYARGEGFGFVLLKPLDAALRDGDVVRAVIRATGANQDGRTPSITQPSQQAQLDLLRDTYRVAGLNVADTDYVEAHGTGTPVGDPIEAAAVGQAFRDGRKADRPLYMGSVKANIGHLEGASGMAGVIKAVLALENAVIPPIAMFEKPNPAIDVTGLQLA…
Alternaria_viburni_BMP_2772_GCA_023758015.1	g4831	KS-AT-DH-MT-ER-KR-xCP	MARSEDPEPMAIVGMGCRWAGGVRNPTDLWELLLNKRSGYHDWAAPRFSAEGFYHPNPERPGTTAAKGGYVVTEDPRLFDPSFFGISGLEAETIDPSQRKLLEVVYESLESAGETWESVNGTRTGVYVADISYDNSYAQTRDWEYARPHATTGVCHNILSNRINYVFNLRGPSVTLDSACTSAMYGLHMAIQAIRDGDCDSAIVATANYIMDPSMQIAMDKLGALSGTSMSHAFDAAADGYARGEGFAAIYVKKPQQAMQDGNPIRALVRGSAIGANGRSSGITHPSGTAQEDIIRKAYHNAGNLSPSETPFLECHGTGTRVGDPLEVEAAGKVFGPGRSSSEEDRLLIGSVKTNLGHTEGAAALASIFKVVLALEAGVIPPSIGVTTLNPRIDFDKAK…
Alternaria_viburni_BMP_2772_GCA_023758015.1	g9559	KS-AT-DH-MT-ER-KR-xCP	MAYEDTKPMPIAIVGFGCRFPGDVTNGEKLWQMLVEKKSARTEVPPDRFNVDAFYNPDGDRFGTCNNRGGHYLAEDVSLFDAPFFSISPAEAMAMDPMQRLLLEVTYEALENSGTPLARVSGSQTSCYVGCFTKDYEEMQRRDMELAPKYQSTGASQTMLSNRLSYFFNLKGPSVSIDTACSSGLVAVHLACQSLRSGESSMAIAGGSNLILSPDIQIEMSDMHFLSPDSISHAFDDRANGYARGEGVGAIILKPLDLAIRDNDPIRAIIRGTAASSDGRTPGITMPSKDAQVDLIRSAYRVAGIDVSETGYFEAHGTGTAAGDPIESGAIGEVFATSRPHRISATTEEVVPLSIGSVKTNMGHLEGASGIAGLIKAMLSVEKGIIAPNLWFERGNPAI…
Alternaria_viburni_BMP_2772_GCA_023758015.1	g10679	KS-AT-DH-MT-KR-xCP-C-A-xCP-Red	MTAHRETSHGNGEPIAVIGSGMRFPGSSNNSSKLWELLLNPRDLLKRIPEDRFNIDNFYHPDPNHHATTDVRESYFLEEDHRHFDAGFFNIKPVEVAAIDPQQRLLMEVVYESLEAAGIPLESLIGSRTGVYVGLMCADYHDHLHKDVDTLPTYAPTGTARSIMSNRISYFFDWHGPCMTIDTACSSSLVAVHQAVQLLRSGDSDVAVAAGVNMILGSGQYIAESSLHMLSADSRSRMWDADASGYARGEGVASVILKRLSTALADGDKIECIIRESGVNQDGRTKGITMPSASAQMDLIEQTYKKAGLDPKDPNQRCQYFEAHGTGTAAGDPKEAEAISKAFFHPGDSTSHKGDPLYVGSIKTVIGHTEGTAGLAGLLKASLAVQHGVIPPNLLFNKL…
Alternaria_viburni_BMP_2772_GCA_023758015.1	g87	SAT-KS-AT-DH-xCP-xCP-MT	MRSQSDHFAPSVAFFCPQSKAPTEAYLEQLQKYIVETPLLLPFAEAITSLTDTWTILCDGHPDIAKLKSGKRHVVSLKRWITDGISGPVSSSMSGILALPLLVVIQICQYFQLLELHGLTHERMLASLKKGGGAQGYCGGLPTAFAVSCAKDEEEVVHLATKALRLAFAVGTFGELGDDELVEGATTIAVRLRTPPQGDELVAGIPRCYISAITDPKTISIVGPVLELEKVAERARNRGLLVTDIHIRGKVHNPENAPLVKVLFDICQEHDDMMLPDASQLRVPVRSNLDGSLLHDCSLTHEAINTILASRCEWYRLLKGVAQDLAGSGTDAHTFALFGIGDPVPLMPFHNARLRISKMEVHTTVQGARLAEYKYPEDAIAITGVSCRLPRAADLEELW…
Alternaria_viburni_BMP_2772_GCA_023758015.1	g10248	SAT-KS-AT-PT-xCP-xCP-Te	MNVLIFGDQTADQYPLLRKACTWKNNSTLTSFLDRVSQVVREEVQKLPRTQRDQIPNFLTTWDLIEAYYAKGLKVPQLESCMVTIAQLSHYIGYYAENPSDLKNPANTRVVGLCTGLLAGSVVASARSLSELLPLAIEAVRIAFRTGTVVGAAKEALEQTPVPKETWSTIVTSISEKAAKDAITAFHQEQRIPTLAQAYISAVSTMALTISGPPSTTKRLLQSDAFKGCTRVSIPVYAPYHAAHLYTEADIDQILDKDATRHLQQFRPLSLVHSASTGECHTATSTLDLIRTALSEILVESVRWDNLLSEVVSQVTATSSQDCSVSAIGVTSITNSLVSALKSGGQSSVTARDHTSWVAAEHDSRGRTQNDKIAIVGMSGRFPGAANPDALWDLLEKGL…
Amauroderma_rugosum_ACCC_51706_GCA_017499575.1	g5494	SAT-KS-AT-PT-xCP-xCP-xCP	MSPAVTILDVPVFAGQGTTAANSPQTRQQALKDAASPAGSLLLSSCFETFHNELSTLTTEELALVDTTLSEFANKNALLEVPSDKYLNNSLITGPTLFLIQSLRYLAFVEASGLENDSLTPFSDVLKGNLEHGLGVFGFSSGILPAVVVGSALSTITYISRAVEAYRLALWIGVRTQIYRAKHAANDPSSPWSLVFLGISKETTEEAILEFAKDNEGASLFVTAVMDDKCVTVSGHPDTLAAFASSLTTGAVVHRTSVDTLYHSPEHIKGVRQEVLDDVVRRSIKFPDYSDIIVPVRSTFTGGALDKKVTDGTLVDAVLDMVLTQPVNWDLVVDGLVKSAPVGIPIRLLNVGPGTGLTRSMERSFSKDVVSSLDLTSVHNEAAGEAKSKQEPIAIVGMA…
Ambrosiella_beaveri_CBS_121753_GCA_030294605.1	g2448	SAT-KS-AT-PT-xCP-xCP-Te	MMTQSKLCFNFFGDQSLDTYQSLADFCRNGEPGIVAKTFMERAGAALRDEIEKLPRLERSRIPVFRSLYQLNENYRAQTLRHPGIDSALLCIFQIAQYIDRAEKAPEDHALNSHTINVGLCTGQFAAAAVSLAKNPSHLVPVGVQTILLAFRLGSHVASLANKLAPVEIGEKSEPWTCIVANVNGEQAKEALAKFHAERSIPNANKAYVSAISAANVAISGQPSTLSKIRSSGVFSTKLIPIPVYGPYHAEHLHGKIDMDSILKLDSADAKKVFEGLEPRSGIVSSSSGELIKKGNVDDLFRSIALECLCEPLMFNKAVESCVGLASAFEKSSECLIVPYGPISISNTLARVIESKTGLIVKLRTSEIKRDTHQAHLGAHGNQLGRGKLAIVGMAGRFP…
Ambrosiella_xylebori_CBS_110.61_GCA_002778035.1	g3119	SAT-KS-AT-PT-xCP-xCP-Te	MMTQSKLCFNFFGDQSLDTYQFLADFCRNGEPGIVAKTFMERAGAALRDEIEKLPRLERSRIPIFRSLYQLNENYRAQTLRHPGIDSALLCITQIAQYINRAEKAPEDHALNSHTINVGLCTGQFAAAAVSLAKNSSHLVPVGVQTVLLVFRLGSHVASLANKLAPVEIGEKSEPWTCIVANVNGEQAKEALAKFHAEYFIPNASKAYVSAISAANVAISGQPSTLAKIQSSGVFLTKLISIPVYGPYHAEHLHGKTDMDSILKLDSADAKKVFEGLEPRFSIVSPSSGELIKESNADDLFRSIASGCLCEPLMFSKVVESCVDLVSAFEKSSECLIVPYGPTSVSNTLARVIESKTGLIVKLRTSEIKRDSYQAHIGAHGNQLGRGKLAIVGMAGRFP…
Amesia_nigricolor_F5_GCA_004802645.1	g3358	KS-AT-DH-ER-KR-xCP	MTANTPIAIIGMSCRFAGDVDNPEKLWDLLAEGRSAWSEIPKDRFNIDGFHHPNFEKPNGTNVIGGHFLKEDIGLFDANFFNLSAETAAALDPQFRLQLESTYEALESAGITLQNVAGSNTSVFAGSFFRDYHESLVRDPDALPRFLLMGTGAAMASNRLSHFFDLRGPSMSVDTGCSTTLTALHQGCQTLKTGESDMSIVGGANLMFNPDMFLAMSSMTLISKDGKSYAFDSRANGYGRGEGSATVILKRLDDAIQDGDPIRAIIRETGINQDGKTETITTPSGEAQEALIRECYRRAGLDLSQTTYFEAHGTGTPTGDPIEVAAIASVFKDTRKDNEPLRIGSVKTNIGHTETASGLAAIIKVALALEKGQIPPSINFEKPNEKLRLDEWRLKVPTE…
Amesia_nigricolor_F5_GCA_004802645.1	g6836	KS-AT-DH-ER-KR-xCP	MADQELMPIAIVGMSCRLPGDVSTPGEFYRMLCRKRSGWSQIPKDRFNAGAYHHPNPDKRGCLNSQGGYFIKNDISQFDAGFFDITRREAESMDPAQRLLLECAYEALENAGVPKEKISGKKVGVFVGGNYNEHRVGNLRDLEHIPTFDATGNQAAFLAGRVAYYFNLRGPTFTIDTACSSSMHALHLAVQSIRAGESEQAIVGASHLITHPDIWVSMGKLRLFSDAGKTFAFDHRADSGYARGEGAGCLLLKPLAQAQADNDHIFSVITHSGISHNGRTVGIVAPSPEEQEKLLRKVFTEAKVDPTEVGFFESHGTGTKKGDPIEATAIYKAVGQHFTPKDPLYIGSAKPNIGHLECASGVTSVIKAVLMLYYGFILPNTDFERANKAIPLDDWNMRV…
Amesia_nigricolor_F5_GCA_004802645.1	g6370	KS-AT-DH-MT-ER-KR-xCP	MNSPNPTTQDNDLGQVPYGDAVMPIAIVGISGRFPGDAENPKKLWDMIEEGRSALSDVPADRYNADAFYHPHNERQGTFNVRKGHFMKQDMAAFDAPFFNIPVAEAKAMDPQQRMSLECAYEALENAGVRMEDVQDSNTSCFVGCFARDYGSMLRADRDDVPMYYGLGAESSMLSNRVSWFFDMKGPSLTVDTACSSSMTALHLACQGLRAGECTMSLVGGTNFMLLPEVVGTLARLHFLSPDGKSQAFDHKANGYARGEGTAFCVLKPLHLALQNGDVIRGVIRNTGANQDGKTPGITLPSAEAQQTLIRRVYTEAALDLADTAYVEAHGTGTAAGDPVEAAALGATFGKARGPGKPLYMGSVKSNVGHLESAAGVIQVVKAVMMLEKGLIPPSIWFE…
Amesia_nigricolor_F5_GCA_004802645.1	g673	KS-AT-DH-MT-ER-KR-xCP	MASTTATTNGGGAASNGERAHAHASADHSATRGSQESGAHSGTTPSIPIAIVGMACRFSGNVTSPSQLWDLCAAGKDGWSPIPESRFDVKSLYHPNNSRVGRSHVEGGYFLNEDIALFDGAFFSLASDVASGLDPQARLLLETVYEATEDAGIPLDALAGSDTSVYAGTFNKDYHEIQTKDAEVLPHAFLAGTGTAMIANRVSHFYDLQGPSMSIDTGCSSGLVAVHQGCQSIRCGESQLSIVGAASTLLSQDAFISASTIGAIGAEGKCFAWDDRAHGYGRGEGVAALILKPLNTALRDGDRIHAVIKDTGLNQDGKTTTITSPSADAQVKLIRECYARAGLELSDTGYVEAHMTGTAAGDPVEAEALARTFGKSREAHDPVIIGSVKTNLGHTEPVS…
Amesia_nigricolor_F5_GCA_004802645.1	g3733	KS-AT-DH-MT-ER-KR-xCP-cAT	MMSATTPIAVIGMSCRLPGGANSPEELWDMLSEGRSAWGPVPSDRWNADAFYHPDSRAKESLVFRSGFFLNQDIAAFDARFWSIPPREANGMDPQQRLLLESTYEALENAGIPLNSLKGSKTAVYIAEFPRDYDRMAYKDLSQLHRLHVTGKGDAILSNRISYILDLKGPSLTIDTGCSGSMVALHQACQSIRTGESDLAIVGGSQLILHPDQTLTMNQIGMMNPDGKCYVFDDRGDGYARGEGTAAVILKRLDQAIADNDPIQAVIVHSGVNQDGRTQGIQLPNADAQAALAKAVYQEAGLDPTKTVYVEAHGTGTQVGDAAEMSSIYQVFCDGKERERDILVGSVKANIGHLESTSGLAGLLKAILTLKHGQVPRVLNLKNPKPALHLDERPIKVPL…
Amesia_nigricolor_F5_GCA_004802645.1	g4567	KS-AT-DH-MT-KR-xCP-C-A-xCP-Red	MSREPIAVIGSGCRFPGGADTPSKLWDVLRSTPDLKREIPNERFNANRYYHPDGAHHGTTNVRHSYFLDGDFKAFDAGFFGIKPAEALAMDPQHRLLLETVYESLESAGLPFEDLRGSQTGVFVGNMSADFVDLMVQDMDTLPTYFGPGSARSILSNRISYVFDWHGPSITIDTACSSSLIAVHQAVQSLRTGEVSLAVAAGANLLLGPSQYVVESKLNMLSPGGLSRMWDEAADGYARGEGFAAVVLKPLKDAIRDGDPIECIIRETGSNQDGKTQGITMPSPIAQAALIRETYRRAGLDLSRPADRPQFFEAHGTGTPAGDPVEAEAIATAFFGPETRFRRRPGDDKLLVGSIKTVLGHTEGTAGIASLLKVSLAMQNGIVPPNLHFNRLSPKVKPH…
Amesia_nigricolor_F5_GCA_004802645.1	g6149	KS-AT-DH-MT-KR-xCP-C-A-xCP-Red	MVVKMAFKQQEPIAIVGSGCRFPGGANSPSALWKLLERPTDVGVDIGPDRFDATTFYHPDGSHHGTSNVLRSYLLQEDVRVFDAAFFNLSPNEADSMDPQQRLLLETVYEALEGGGHTLEALRGSDTAVYVGTMTADYNDTLIRDHNTMPNYFATGTNRAIISNRVSYFFDWHGPSMTIDTACSSSLIAVHQSVKTLRAGDARVSVACGTQVLLNPEMYIGESKLKMLSPNGRSAMWDADADGYARGEGVAAVVLKRLSDAIADGDHIQCIVRETGANQDGFSNGLTVPNTDAQASLIRQTYARAGLDPENEPRDRPQFFEAHGTGTQAGDPKEAAAIHQCFGQHIDSHDTPLYVGSVKTVIGHLEGCAGLAGVLKGVAMVQSGFVAPNLHFNRLNPKI…
Amesia_nigricolor_F5_GCA_004802645.1	g2002	SAT-KS-AT-PT-xCP-xCP-Te	MAAHLDNNEVGKKLVCLLFGDQSLDTHGFLTRFFRQENHGVLAKAFLGQATHALLAAIGELPLDQRKIFPPFRNLQQLNERYAIQKVKHAGIDAALLCVSQLAHYLDHIEKNFADVTPLDDTILVGLCSGLWAAAAIATAPSLPDIVPTGVQAVLFALKLGSYVHAIGQRMSPTHERSESWTYLYSGLSQEDTEEKLASFHRDEGTPALNRAYVSAVSSATITVSGPPRTLKALNGSGILSSTYPPSSLPVHGPYHAHHLHSTADVEKILGLNDQKVQDALYNSRPRFPVMSCGTAQWFQASDTKSLMASIASTVLNETLVFNKVLDTCVEHARQFEGKQCLVLPLGPTMNATTLSNLLKKETSLEVTLRQTFASSSSGTTTPRIGNQGSVQRPKLAIV…
Amesia_nigricolor_F5_GCA_004802645.1	g5883	SAT-KS-AT-PT-xCP-xCP-Te	MTEPPQLFVFGDQAVPYAAELRRFIAKREDYTLSNLLSQAYHELRAEIARLPYSQRTHFPASSTLVELLNAHGSSARPNCALDSALACLHQIASFVSYFNETAKEYPKPSSTCLVGSCIGLLSAFAVSCGETILDLVDLGPEMVLLAFRLGLAVQKKTASVMSGLDSVTSVSFVVAGIDRDTASNLINDFCRSRSLSPVACVYISAIGNSNVTVSGPPVWLDDFFSQNPRLKSAKIAMSGLFHSAILYDPSTVVALVETVGAKLRHRAGRLNIVSNSEGDPTILPGPAEQALHTILSDILLRQMRWDLVAQRAAELSRRSDPSVAAIFPFAAGSVQGIAAAIRESRGGDSATIIDTARQSRSVDTGGRSGADADAPGGRRDRSKIAIIGYSGRFPEAEN…
Ampelomyces_quisqualis_BRIP_72107_GCA_018398575.1	g4000	A-xCP-KS-AT-KR-xCP-Red	MSESTAPEYHQAAPELFNDTDDALTLGHCLHQLLQNVTEKYTDKTALICANEELSYGEVNGLANRFAHVLGQHGIKRGDRIGIALDRSIDLVVMLIAVLKSGATYIPIDATFPEERIHQMLCDAEPKIVIIGPSTRNALSFWKGVCLDSSTIPRGELDLKSEKSNPEVEVFPHDLAYIIYTSGSTGTPKGVEIQHGALCNFLLGAQKEPGCEEKDRLLAISTVSFDIAMLEIFLPLISGATLVVAQTNEIKDPNRLMHHLEHYEITTMQATPVTWQMLLDSGWKGASYLSKIFSAGDALPRGLADRLIPCADSVWNLYGPTEATIYSSYWRVCFDSRMLIGKPFNNYRLYVLDENLEAVPLNSEGELYIGGAGLARGYLNKPEITGTRFLPNPFHKGLM…
Ampelomyces_quisqualis_BRIP_72107_GCA_018398575.1	g9064	KS-AT-DH-ER-KR-xCP	MWDHASSADIIRVGPSEMAPYALTPTTERGELFEGNEFVIQSDGFQSNGASTPSTQDSNDFDADTAPLPANGSNGHGEAHEISNSTTHGTPLNGSLTYENAYTDGYKDGYTSGYKTSTIELKHQPVAIIGMSCRLPGSVSTPDEFWELLARSRTGFSPIPASRFSANRFFHPNPGKSGTTNARGGNFLTHDLTAFDAPFFGFTQQEAISLDPQQRLLLECTFEALEAAGIPKHDVVGKDVGVFVGGTFSEYDTDLFRDPETMPMHQATGCAMAMQSNRISHFFDFRGPSFTVDTACSSSLVALHTACNSIRNGESSMAIAAGVHLNMLPEFWISYSMSRLFGEAGRSFAFDQRGTGYGRGEGCGLVLLKSLEQAIKDNDPIRAVIVGSGINQDGKTPGI…
Ampelomyces_quisqualis_BRIP_72107_GCA_018398575.1	g6326	KS-AT-DH-MT-ER-KR-xCP	MEPIAIVGLAFKLPGGAENDSSLWNILEQGKNVMTVWPKSRTNIDAFYDSNTDRMNTVPARGAHFLHGDFTAFDAPFFSISKREATAMDPQQRMLLETTYHALEDAGMPIEHVAGTQTAVYAGSMETEYHRMISKDPDEALQLTGTGVSISITANRISWFYDLQGPSVQINTACSSSMIGIDLACQSLRCGQSSMALVTGSNLLLSPELSLYLANLNMLSPDGICWSYDHRANGYSRGEGIIVLVLKTLSDAISAGDNIRAVIAGAGSNQDGRTPGLTQPSASSQEALIRSVYRSANLGFEKTRYVEGHGTGTQVGDATEIKAIGSVFRSSRSRSAPLYVGSVKSNVGHLEGGSGLAGILKSILILEKGIIPPNALFEKLNPKLRAERNNIQVPKTCVA…
Ampelomyces_quisqualis_BRIP_72107_GCA_018398575.1	g8227	KS-AT-DH-MT-ER-KR-xCP	MTINSHGSRTNETCDSHINGSNPMVDQVNESLAIVGMACRFAGDATSPEKLWDLVSQGRDAWSVVPDERFNQNAFYHPRSDLLSTMSMKGGFFLQGDPGAFDTSFFNLSAEVAAAMDPQIRIQLEIVFEALESAGIPLSSVMGSNTAVFTGSFTKDYHDLQLRDPLKMSRSFVTGNYAAMLANRVSHFFDLKGPSVAIDTGCSTSLMGLHFAAQSLRAGDSDCAIVGGACLNLNPDAFVNLSTLQTCGPDGKCYAFDARAQGYGRGDGIAAIVLKRLTTAIHDGDVIRAVVRETAANQDGHTPTITAPSSDAQQKLIAACYARAGLDPLDTTVVEAHGTGTKVGDPAEARAIGQAMGRGRDTPLYVGSVKTNLGHTEAASGLAAVIKMVLALENRQIPP…
Ampelomyces_quisqualis_BRIP_72107_GCA_018398575.1	g5073	SAT-KS-AT-PT-xCP	MPSSSSWDSMEDAKSSLLFFNNDLPSDDINHLYRVLHRRTAQLSCPQLSHFITLCNQVIKEEIAKLPKKWQENVPDFVNVLSLVNDNAFRKGPLGGAMEGVFLNIFQIGMILGHHEVEQVPYQFNPKTTTLFGLGTGLLSAAAASVSLNIADLAVAGAHIVRASFRLGIHVYNFSEQLEAPDVDGNPWAFVIPGVAAEVVQAELDQYNRDTANPTLSHIFISASDKASVSVSGPPSRLRHCLKSCDVLRYYNFMPLPVHHGLCHAPHIYSAADVQAIIEDILHDDHTRIAGLKTSLPLLSSSTGRPYPAKDFRSLIDQVLAELLMNKIHIDNVVDGIIEVLDLSSAIQKEGNLFAFRNSVVLRTMMKNVEKQCDGRITFTHQDLVEWTKREDSDAESPI…
Ampelomyces_quisqualis_BRIP_72107_GCA_018398575.1	g5321	SAT-KS-AT-PT-xCP-xCP-Te	MPFTAPVTQAESHEIQRQILLFGDLSLVQFEESFRRILHVKTNALLTSFIDRVNYSLRRLLETLPLEQQIFFPRFTTLIDLVSKLGETEGTPVLRFFLLSVHEVAQFLVHYGSGSKPFPSPANTYVLGPCTGGFAAAAISCSKGLPDVVPHGVAACMTAFKTALCSYLVGRSQSRVQATESKSWSVLLNPQKDIEVEDLLKDYMPNQAALRNLPIWVSAVGKSTTLSGRPAVLQDFITKNASRVKSSRYLDVESPYHAAHLFNDDDVEEIVGDLVQADNRVVNFPFIASSTGKVISTGSLVDLLRTVVQEALEEPVRWDLVLASCRDQFSSAKECIIFPFSSHAASMVSSTLDKDGVQVAVEEITAPVTGEVPTEPTGKFEHSKIAIIGYSGRFPNSAS…
Ampelomyces_quisqualis_BRIP_72107_GCA_018398575.1	g7898	SAT-KS-AT-PT-xCP-xCP-Te	MNILIFGDQTADQYPLLRKACTWKNNAALTTFLDRISVVIRDEVQKLPRAQRDQIPDFLTTWDLVEAYYSKGLKVPQLESCMITIAQLAHYIGYYAENPSELPNSADTRIIGLCTGLLAASVVASARSLSELLPLATEAVRIAFRAGSCVSVARAALENVTIAKDSWSTIVTGISEKDAKSALALFHDDRLIPTSARAYISAVSVMALTISGPPSTTRLLFQEIEPFRHIARVPIPVFAPYHAPHIYNQADIDRILDKDAARHLQQFRPLSLVHSATLGKCQTATNTLDLVQAALGEILFEPVRWDKLLEEVVCQVTATSSAKCSVSAIGVTNVANSLASALKSGGQIDVSVRDQSLWCATTDESRGRTQNDKIAIVGISGRFPGAASPEKLWELLEKG…
Ampelomyces_quisqualis_HMLAC05119_GCA_010094095.1	g6715	Atg_2-KS-AT-DH-MT-ER-KR-xCP	MESQSSSGALKRQIEAQRLQLLSTSTKSIPAFYRNVEEALDSRRATHSLFSILQNNWQTSLAIDFCSNDYLSWNTTGLIRKAFLDELGANPGFSVAAGGSRVMEGNYAYIEETEQEIATWHGAQAGLIVNSAFDANVMVWSALPRPGDVIVYDNLVHASTHEGMERSLAIQKTAFEHNDVKAFRMTLSTILESSPMIKQGRRSILVAVESVYSMEGDVCPLLELVEIAEELSGGLGNIQFVVDETHSAGLFGPDGAGLVCELGLEDEVAVRLHTYSKAMGACGGIILGNATIKAALINFARPSIYSASPSFPFVAAIRAGHNMLGKIQQLARTFFESLTSHPLWEQARDRGILDVPLASNWEERPFLTHIVPVWTRQNYLYWLLFHCLAASFFVLPVKH…
Ampelomyces_quisqualis_HMLAC05119_GCA_010094095.1	g1146	A-xCP-KS-AT-KR-xCP-Red	MSESTTPEYHQAAPELFNDTDDALTLGHCLHRLLQNVTEKYTNKTALICANEELSYGEVNGLANRFAHVLGEHGVKRGDRIGIALDRSIDLVVMLIAVLKSGATYIPIDATFPEERIHQMLCDAEPKIVIIGPGTRNALSFWKGVCLDSSTIPRGELDFQSEKSNPEVEVFPDDLAYIIYTSGSTGTPKGVEIKHGALCNSLLGAQKEPGCEEKDRLLAISTISFDIAMLEIFLPLISGATLVFAQTNEIKDPNRLMHHLEHYKITTMQATPVTWQMLLDSGWKGASYLSKIFSTGDALPRRLADRLIPCADSVWNLYGPTEATMYSSYWRVCFDSCMLIGKPFNNYRLYVLDENLEAVPMNSEGELYIGGAGLARGYLNKPEITRTRFLPNPFHEGLM…
Ampelomyces_quisqualis_HMLAC05119_GCA_010094095.1	g5996	KS-AT-DH-ER-KR-xCP	MAENGQQADPVTPIAVVGLSFRGPGDATSPENLLRMVSEGRESRSKIPEQKWNASGFYHPDASRYGTHNVEYGHWMTQDPYAFDAPFFNLSTAEAAALDPQQRMLLECSYEAFENSGTPLSRIVGTSTSVFAASFAADYTDMLWRDPESVPMYQCTNAGFSRANLANRVSYSFDLRGPSIMVDTACSGGLTALHLACQSLWTGEVRQAIVAGSSLILGPEVMVTMSMMRFLSPDGRCYAFDDRANGYARGEGVAVLVLKRLDDAIADGDTIRSIIRGTGANQDGKTPGITMPNGVSQEALIRSVYDRTGLDPLETSYVECHGTGTQAGDTTETGAISRVFSAGRQDLLTIGSVKTNVGHLEGASGLAGIIKCILMLENEVILPNRNFEKPNPKIPLKDW…
Ampelomyces_quisqualis_HMLAC05119_GCA_010094095.1	g7546	KS-AT-DH-ER-KR-xCP	MAPYALTPTTERGELFEGNEFVIQSDGFQSNGASTPSTQDSNEFYANPATVPANGSNGHGEAHQISNSTTHGTPLNGSLTYENAYTDGYKDGYTSGYKTSTIELKHQPVAIIGMSCRLPGSVSTPDEFWELLARSRTGFSPIPASRFSANRFFHPNPGKSGTTNARGGNFLTHDLTAFDAPFFGFTQQEAISLDPQQRLLLECTFEALEAAGIPKHDVVGKDVGVFVGGTFSEYDTDLFRDPETMPMHQATGCAMAMQSNRISHFFDFRGPSFTVDTACSSSLVALHTACNSIRNGESSMAIAAGVHLNMLPEFWISYSMSRLFGEAGRSFAFDQRGTGYGRGEGCGLVLLKSLEQAIKDNDPIRAVIVGSGINQDGKTPGITMPNASAQEALIRSVYK…
Ampelomyces_quisqualis_HMLAC05119_GCA_010094095.1	g6004	KS-AT-DH-KR-xCP	MTASTSVPSDPSVPIPLAIVGMSCRMPGGVSSLEDFWTMLTNSKDGYRAFPKERFNWEAYYHPNQRRKDSINVHHGYFLDGDVKEFDAGFFKMNAIDATSFDPQGRIILECVYEALENAGVPKESIAGTKVGVFSTSNTSDYTLELKDDTPSMPSIVGVLGHNCMLSNVVSNVFDLRGPSVSVDTACSSAFYALQMAAQSLRTGETEMCIVSGCALNLSPWRWTMLSNLTMLHQDGITKALDPSADSGYARGEGAASIILKPLDKALRDNDRIHCVLSHIGVNHNGHTNGYTMPDAAMQATLMEQLQAQVDIKPDEFGFVEAHAPGTRVGDPIEIAALQKVFSSEARSPEKPLLIGSVKANVGHLESSSGFPSLIKAALMLGKRQVVPNANFKDEAMNA…
Ampelomyces_quisqualis_HMLAC05119_GCA_010094095.1	g2913	SAT-KS-AT-PT-xCP	MPSSSSWDSMEDAKSSLLFFNNDLPSDDINHLYRVLHRRTAQLSCPQLAHFITLCNQVIKEEVAKLPKKWQENVPDFVNVLSLVNDNAFRKGPLGGAMEGVFLNVLQIGMILGHHEVEQVPYQFNPKTTTLFGLGTGLLSAAAASVSLNIADLAVAGAHIVRASFRLGIHVYNISEQLEAPDADGNPWAFVIPGAAAEVVQAELDRYNRDTANPTLSHIFISASDKASVSVSGPPSRLRHCLKSCDVLRYYNFMPLPVHHGLCHAPHIYSAVDVQVIIEDILDDDHTRIAGLKTSLPLLSSSTGRPYPAKDFRSLIDQVLAELLMNKIHIDNVVDGIIEVLNLSSASQQERNLFAFRNSVVLRTMMKNVEKQCDGRITFTHRDLVEWTKREESDAETPI…
Ampelomyces_quisqualis_HMLAC05119_GCA_010094095.1	g1538	SAT-KS-AT-PT-xCP-xCP-Te	MPSTTPVTQAESHEFQRQILLFGDLSLVQFEESFRRILHVKTNALLTSFIDRVNYSLRRLLETLPLEQQIFFPRFTTLIDLVSKLGETEGTPVLRFFLLSVHEVAQFLVHYGSGSKPFPSPANTYVLGPCTGGFAAAAISCSKGLPDVVPHGVAACMTAFKTALCSYLVGRSQSRVQATESKSWSVLLNPQKDIKVEDLLKDYMPNQAALRNLPIWVSAVGKSTTLSGRPAVLQDFITKNASRVKSSRYLDIESPYHAAHLFNDDDVEEIVGDLVQADNRVVNFPFIASSTGKVISTGSLVDLLRTVVQEALEEPVRWDLVLASCHNLFSSSKECTILPFSSHAASMVSSTLDKDGVQVTVEEITAPVTGEVPTEPTGKFEHSKIAIIGYSGRFPNSAS…
Ampelomyces_quisqualis_HMLAC05119_GCA_010094095.1	g278	SAT-KS-AT-PT-xCP-xCP-Te	MNVLIFGDQTGDQYPLLRKACTWKNNAALTTFLDRISVVIRDEVQRLPRAQRDQIPDFLTTWDLVEAYYSKGLKVPQLESCMITIAQLAHYIGYYAENPSELPNSADTRIVGLCTGLLAASVVASARSLSELLPLATEAVRIAFRAGSCVSVARAALENVTIAKDSWSTIVTGISEKDAKSALALFHDDRLIPTSARAYISAVSVMALTISGPPSTTELLFQEIEPFKHIARVPIPVFAPYHAPHIYSQADIDRILDKDAARHLQQFRPLSLVHSATLGKCQTATNTLDLVQAALGEILLEPVRWDKLLEEVVSQVTATSSAKCSVSAIGVTNVANSLASALKSGGQTNVSVRDQSLWCATTDESRGRTQNDKIAIVGMSGRFPGAASPEKLWELLEKG…
Amphirosellinia_nigrospora_JS_1675_GCA_004123355.1	g3349	KS-AT-DH-ER-KR-xCP	MAKTYTQQQPVAIVGFAYKLNGKPVACFVGAYSSDYGDMQNRDPEDRPANNAIGVGRAIMANRISYFLNIKGPSITIDTACSGSLVGLDLACRVLQSGEVDAALVATSNIYLNPDHVIDAGNVGQAHSPSGLCHTFDVDADGYVKAEAVSCVIVKRLSDAIRDRDPIRAVIRGLASNSNGRTQGIASPSAEAQAAAIRQAYSNAGISNLNDTQYLECHGTGTQAGDPTEIKSNVGHSEPAAGISGLIKTVLSLENGMIPGTPLFITPSPKIDFAGNKVRASRTMIPWPDVAGKPRRASINSFGYGGANAHAVIEEADRQQRVHHISSFMSPDEDAWDDPTVDEAVRPQVLIVSANDAASLKSNIEALANHLLNPRVKVRLSDLAYTLSERRSRLWHRAF…
Amphirosellinia_nigrospora_JS_1675_GCA_004123355.1	g3977	KS-AT-DH-ER-KR-xCP	MAMSQQEIESILAKDGPMPIAIVGVSGRFPGDASTPDKLWDMVSQARSALTDVPKERYNIDGFYHPSAEHQGTTSTRKGHFISSDVGLFDAPFFKISAQEAHAMDPSRDLLSSSHMRLWNQMGCYLGTCVRDYAAIRAIDPDDYPRYEANGSMGTAMVSNRISWYFDLKGPSLTLDTACSSSLVCLHLAMQSIRTGESNMALVGATNLILAPHTSNHLSTLSFLSKDGKSQSFDHKANGYSRGEGVSFIVVKSLVDALRDGDCIRAVVRGTSVTHDGRTPGINLPSAESQEDLIRAAYINANLSPENTTYFEAHGPGTPAGDPLETAAISKVFSKYHSSDFPLYVGSVKSNIGHLEAGAGIAGLTKAIYALEKGQIPPTSAIGLYDVGTPNSPPLASFV…
Amphirosellinia_nigrospora_JS_1675_GCA_004123355.1	g7919	KS-AT-DH-ER-xCP	MSVEPIAVIGLDCKYPCDGDTPEKFYEFLVEGRSARKPIPRERYNAEAFWHPDNHRDGVIGGKEAHFINANVKAFDAPFFSITPAEAACMDPQQRLLLECAYTAFESAGITIDQLHGSLTGALACGTNVILAPEMGLELNGLGVLDRTSTSYTYDERAGGYGRGEAIGAIVLKRMSDALRDGDTIRAVIRNSGSNQDGRSNGLTAPCKESQVSLMRKTYAQAGLDPSVTRFFEAHGTGTPTGDPVEASAISEMFSHHRSPEEPLHVGAIKTNVGHSEGASGIESIIKCILTVENGIMPANAWFNKANPKIPMEKWHFNFVTEALPWPPTENGVRRARGCSAPHKTIETPQLPHKNDSNNSSLAASTSSLANGDSEPTDGISTPASSSLSLENSSSAVTW…
Amphirosellinia_nigrospora_JS_1675_GCA_004123355.1	g7108	KS-AT-DH-KR-xCP	MVAHSSPRADISVNGYSDQAFNATRRNHAVERSEVQDASTDVAIIGMSCRTAGGVNSPEKLWELLVSKKDASGEVPQHRWEPWLRRDPRNKKQLEQTVSKGYFIEDIENFDASFFGISPKEAEQMDPHQRLGLELAWEALEHAGIDPKSLSGSDTAVYMGCDSDDYSRLLLEDIPNIDAWMGIGTAAHGYQAILNGESEVAITGGVNVLLAPALTRMLGKAGALSPDGICRSFDDAANGYVRGEGGAVVILKKLSSAVADGDKILAVLRGSAIAQDGKTNGIMAPNTKAQELVGRWALERAGIDPLSVSLVEAHATSTPLGDPTEVSAIMALYGEGAGRSPDAPVYLGSIKPNVGHLEAAAGAIGLVKAVLAVNKGQLAPQARLDKLNSRVDWDRSALH…
Amphirosellinia_nigrospora_JS_1675_GCA_004123355.1	g7659	KS-AT-DH-MT-ER-KR-xCP	MTDNRPKTEPLAIVGMACRFAGGITSPEKLWNFVAQGKSAWSEIPESRFNRSSFHHPEPNKAATSFIQGGYFLEEDVGLFDPSFFNLSSEAAAAMDPQIRMLLELTFESMESAGIPLEKMAGSRTGVYAGSFTKDYHDRLLSDPLHVSRAFVTGNYAAMTANRISHFFDLKGPSTAVDTGCSTSLVGLHLACQSLRLRETDCAIVGGACINFNPDFFGHLSSLGSCGPDGKCYAFDHRAQGYGRGEGVAVLIVKRLEDALRERDPIRAVIRETAVNQDGKTATITSPDIDAQRNLIRECYESAGLDPGETTLVEAHGTGTKAGDPIEATAIGTAISESRPADQPVYLASVKTNLGHTEAASGLAAIIKTAKSLEVSRIAPSINFERPNPEIDFEGLRIK…
Amphirosellinia_nigrospora_JS_1675_GCA_004123355.1	g8000	KS-AT-DH-MT-ER-KR-xCP	MDQAVGYTNGNGPATKVNGVNGVNGVNGVNGVNGINGVNGKSINGHGPKFLPIAICGMSCRLPGKVNSPADLWEFIMAKGDARIPVPETSVDLAALDTSFFSIARTEAERLDPQQRILLEVARECVDDSGETGWRGKDVGVYVGSFGNDWYDVTQRESQRYGVYQVGTSHDFAISNRVSYEMDLRGPSMTIRSACSSSLVCLNEACAAIAKGDCSSAIVAGTSIITAPALTADISESGTLSPDGSCKTFSSAANGYARAEGVVAIYVKPLKDAIRDGNPIRAVVVGTATNGDGKTPGMSMPSSSAQETLIRRTYENAGWGPIETEAIARIFGKSGGVHIGSIKPNLGHGEGASGLTALLKAVLALEHRTIPPNIKNLPASNKIPFKAAQLKVPTEAVQW…
Amphirosellinia_nigrospora_JS_1675_GCA_004123355.1	g10532	KS-AT-DH-MT-KR-xCP-C-A-xCP	MSQPSDRAEPIAIVGSACRFPGSASSPSKLWTLLSKPRDLGFEIPSDRFGKGFYHPNGAHHGTTNVQHAYLLEEDIRMFDAAFFNIHSKEANSIDPQQRLLLETVYEVFGHGSNRAIISNRVSYVFDWRGPSMTIDTACSSSLIAVHQGVTSLRAGESRVAVACGTQVILNPEQFIAESKLQMLSPTGRSRMWDKDADGYARGEGTAAIIMKRLSDAIADGDHIESIIRETGTNQDGRTPGLTMPSSEAQSALIDRTYKRAGLDPVNNPRDRPQYFEAHGTGTQAGDPREAGAIYEAFGRHIHPSETPLYVGSIKTVIGHLEGTAGLAGLLKASASIQNGYIAPNLLFNTLNPKLEPFYKSLKVPTELTPWPEVPEGVPRRVSVNSFVSEASLVAQLRA…
Amphirosellinia_nigrospora_JS_1675_GCA_004123355.1	g1366	KS-AT-DH-MT-KR-xCP-Red	MATRLSEPIAIVGSACRFAGSASSPSKLWEQLRQPQDLQKEIPENRFRWQGFYHPDGTYHGHSNVKHAYFLDEDPGVLDAEFFGIRPVEAKALDPQQRVLLEVAYEGLESAGMSVPALRGSDTAVYAGSMGDDYAKMILEDIQDAPTYYATGAARSILSNRVSYTFDWHGPSISIDTACSSSLVAVHMALQALRAGDCRMALACGTNLILGPENFIIESKLGMLSPDGRSRMWDQGANGYARGDGVAVLLLKTVQSALEDGDDIECIIRETGLNQDGATAGITMPSASAQTALIRRTYAKAGLDLLRPEDRPQFFEAHGTGTPAGDPIEAEAIHNVFSIADDDHKCEKPLYGGANAHAILESFDTVQNINEADRSLFTPFVFSAYSESSLANMLRNYAA…
Amphirosellinia_nigrospora_JS_1675_GCA_004123355.1	g475	KS-AT-MT-KR-xCP-A-xCP-Red	MWATLLQGDILISTQMGMPRLIREWQCDVAEPRNLNDGDFDEDTQTLPPSRPETEITTSLHILARRRVFKALGAAVDLTAAVVPCPYSDVMKVDPCAGEYLPSYTMSFDGNDDSMLDRLSWVEKIWPNHAPATRDQIETALRKAHDIWTRLSSSSRDARKASETLTLLFNNQLGQITSLSSSQPASLILTSNMDLDNGNSFNFMAQFGVAVVSLADPTARPNYGATEEPRDLSTKVPDSRFNVDTFYHPEATHHGTTNATKSYFLEEDISQFDAGFFNIQPMESEAIDPQQRLLLETVYDSLCAAGLRMEKLRGSSTAVYVGMMCDDWSTMFLVTGNPFRPCSSSLVAVHHAIQALRSGESQVAVASGTNLILSPADGYARGEGVATVVLKTLRQALAD…
Amphirosellinia_nigrospora_JS_1675_GCA_004123355.1	g21	KS-AT-PT-xCP-xCP-Te	MPTAIPVYGPYHAPHLHGTLNIDLLLGLNDERVIAALANAKPRSGVMSCVTGRSFSQTDTKSLLKAVVHEILNEPLYFHKALNGSIEEARHFNGSRILVIPCGPTQAASTLANLLRSETKSEVVLRLPPQISRESNATHIGNHGSTGKCKLAIVGMAGRFPDSESVEALWELLEKGIDAHRVIPANRFPVENHYDPTGKAINTSHTPYGNWIKNPGHFDPRFFNMSPREALQTDPMQRMALMTAYEALEMSGYVPNRTPSTRLDRIGTFYGQTSDDWREINAAQEWIHTSSQAVCELLGRGESTTISGSAVPASTLTLLALRVPQQCKLPAHLYGRKNVTQLFRGQFLSKNNNCNTFDNEADGYCRADGCASVVVKRLDDALADKDNILAVVGTQTNHS…
Amphirosellinia_nigrospora_JS_1675_GCA_004123355.1	g3239	SAT-KS-AT-DH-xCP-MT	MTEAHLAESNYVLFGPVVTSWTSEGLQELQAALQENTSFAFLRHALTDLPSLLPILQSDEVSPFVSRLEHLQELSDFASGQSILDSTTLSNVHLAPLTVIYQAVEFIRVANLPEFHDDKSTQALSSLPKLQGVQGFCLGFLSAAAASSSRSWEALEQNFATSIRLSACIGAIIEADLQSHTDGLKSLSIRWKTDRARMQADTCLDLFSDTFISCITDEKSVTVTIPGENVAEYIEQLSQIGVTAKEIGLNGAYHSKRHAKAVEALIRVAEDKDNLQYKDSLVYPLRSNANAQLIGTEPLHEVALRTILCNRAHWYQVVKSAVDSLRGTTVRPLPIGKGSFVPRAITTRKNGSLSPETEASQTTETDDRWTDEIAIVGMSCRYPSADSPSDFWDLLCDRV…
Amphirosellinia_nigrospora_JS_1675_GCA_004123355.1	g2985	SAT-KS-AT-DH-xCP-Te	MATTTRRHVLLFGDQTDDVTSCISDLYIASKQSALLAKFLRDASDLCQIEFGNLQPCFRNETPPFESLLEMVDNHAKTDRSPVLASCVLSYFARLGSSSYFNVLQSLLNRFHEEHGILKHRSTWIGVVGRGWVTISGPPSTLQLLMSRLESCDELDGGLSFVPLPVASAVHAPHIPGFDFDSTAKTSYIWDLPLQEGACIMSTDECIPYNARTLGEVTRRIIPAIISAPLMVEKTFKATAEHLKQVCTNVDISIIGPSAQAASLVRTLNHAGIGVDVRTFPDYKPCLQTRSGSGAVAIVGMSARFPQANDLEQFWKLLMEGRTTHERVTEHPNSMMNTDGCFLSNPGAFDARLFNMSPREAMQVDPTHRLLLMTSLEALEKAGYNPNSGPSSRSKRTAV…
Amphirosellinia_nigrospora_JS_1675_GCA_004123355.1	g7116	SAT-KS-AT-PT-xCP	MTQAKVIYFSGEIPQGDPEGDQRDLFRKLYSLSKEKSHTVLASFLHSVTYSLKEECHQLSKPLKDSIPAFESVLDLTDHVVELRKTPLGPAVERVLVFVFQLGSFIAHHEVHPLEYDFRPSNTSLIARGPGMLSAVAIGLSPSFVMLPAISGDITKVAFRFGLVVNQVCISLETSPNEINFDGAWVYCVYAVDVNDARRAVSEFNTEKALPIPSMASVFSSDGKSVSIGGQPSTLSALFSESEFFKNTTNVPMKKVQGMWHSGNAYGIEHVKQIVPRFRHKHGLQLPLFSPTTGKLYEIMDPTSLLEKVMEEMLTEQIRWDKTIDGVTRLLSHISPASIKMIAIQPSQYIESLLDYWRAEFPSAVVSSQDMMSAAMSIPLEGSSPRDPKSSKIAVVGMA…
Annulohypoxylon_maeteangense_CBS_123835_GCA_022496945.1	g2728	KS-AT-DH-ER-KR-xCP	MPALTRSPSSSSGSSYDERPTASHELPTPDTAASSASSSMGADEYPALSFPGYAEKPLDEQLEPIAVIGMGCRLPGDVNSPSEFWNLMMEKRSGQTPKVPKSRFNIDAHIHENNDRPGSFAVLGGYFLNGELSDFDPGLFGITPVEAMWMDPQQRKLLEVVYEALESGGISLEKISGTRTAVFAASFTADWQQMAFKEPSFRHSLAATGVDPGLISNRISHVFNLNGPSIMCNTACSSSVYALHNACNALRNREAEGAIVGGVNLIITVDQHMNTAKLGVLSPTSTCHTFNADADGYGRADAVGAVYLKRLSDAIRDGDPIRGVIRSTATNSNGKVPAAGITHPNREGQMNVITAAYKRGGDLDPRLTGYFECHGTGTAVGDPLEVNAVAMAMNKNRQP…
Annulohypoxylon_maeteangense_CBS_123835_GCA_022496945.1	g3178	KS-AT-DH-ER-KR-xCP	MEPIAVVGLGCRFPGNATSPVALWDMLREGQNEARAIDPQQRILLEVSVEALDSAGVDRDAIRKSDTGVWVGSFVKDYEQIVLRDPDDSPKYGATGNGIAIMSNRISYFLDVNGPSMTIDTGCSASLGLAGGAGLILTPNTMMPMTALNFLSPDGKCFTFDARANGYGRGEGIGIVVLKRLTDAIRDNDNIRSVIRGSSVNQDGRTPAISDAFCGDRTSNNPIYVVPISNTSWPVEGLRRASINCFGFGGTNAHVIMDDAAHYLAERGLIAHHNTVSLDLISREAKADCPNDAMREDVGSDQDIQIPPRDSQSHLFVFSAHEQKVLSRMLKDCDSYMNERVGAIPTDTMENLAYTLGCRRTKLPWRVSVTAQSPGDLVQKLASLRSSDFVRALDGKATR…
Annulohypoxylon_maeteangense_CBS_123835_GCA_022496945.1	g4516	KS-AT-DH-ER-KR-xCP	MAPSATNGSAYSTSNGVHEDSRAPTNGYTNGHTNGHTNGHANGFANGSSTHANGNGNININMNGTNGHSTQPFGHTNGHRVGQTNGLSNGHTNGNSNGNGIGISNGVSNGVNGNQTPSIKDKAQPIAIVGMSCRLPGNVASPAEFWELCARARSGYSEIPKERFNTASFYHPNPGKAGSHNPVGGHFLNTDLQAFDAPFFSLTEKEAISMDPQQRLLLECTFEALENAGIPKHTIIGKEVGVFVGGSFPEYESHLFRDPDTIPMHQATEQARRDNDQIRAIIVGSGINQDGKTPGITMPSGDAQGDPIEATAIHNVLGANRSARDPLYIGSVKSNIGHLEGASGIVAVIKSALMLERGFILPNYDFKYPNEKIPWKQWNLKVPVSQRPWPRNKKYLSVN…
Annulohypoxylon_maeteangense_CBS_123835_GCA_022496945.1	g4834	KS-AT-DH-ER-KR-xCP	MEEGVAKNEPPETRFRLAGHYDGSQKPYTMKTPGAMFMEDVDPADFDAQFFNVNHAEASSMDPQHRNLLEVTYECLENAGIPLEKLSGQRVGCVRNQVDAMLVGGTNMYFSPERNQDMSSMRHTASATGQCHVFDSSADGYVTAEAINTVFLKRLKDAVEAGDPIRAIIRGTSTNSAGKTPGIAMPNAEAQAAAIRAAYANAGISESNFFDTGYLECHGTGTRVGDPIEVEAVASVFAQDRSPEQPLIIGSAKSNVGHSEGAAGLSGLIKAVLAIENKTIPGTANFTTPNPRIDLEKSRTDTQVSPDSFVIGKRPGHEVKVGFVFTGQGSQWSAMGKALLHSFPRAREIVESLDAVLAALPEPPPWSLVSELTEERDPAVLREPEFSQPLVTALQLAYL…
Annulohypoxylon_maeteangense_CBS_123835_GCA_022496945.1	g1372	KS-AT-DH-ER-xCP	MAPYLDLGLSQSGRDSSPPTANGHDNSKSPDIAIVGYSFEFPEADTDDALWDIMLSGRTTASEFPAERLSARNYRGIDESEKGTVYPRRAAFLKRDLGAFDANFFGMTAEEASAADPQQRILLETTYKALESGFAAGMPMERVSGSRASVHVGAFGMDYLLATGKDPQRGPKYASTGMALSMLSNRISTFFNLTGPSVTLDTACSSSLVAFDLACRSIKQGESSMGIVAGCSMLLTPDYFLSLSNLGLLGPDGLCRSFDSKGNGYGRGEGFGVVILKPLDDAIRDGDTIRAVVRATETNQNGRTSLAQPDENAQLQLIKDTYRHARLDISRTRYLEAHGTGTVVGDPIEAMAVGSAFGPSRKAADPLIMGAIKANIGHLEGASGIAGIIKTILVLEAGI…
Annulohypoxylon_maeteangense_CBS_123835_GCA_022496945.1	g3595	KS-AT-DH-ER-xCP	MESEAPMPIAIVGMSCRLPGDVSSPGDFWKLLTKGRSAWSKIPKGRFNQEAYNHPNPEKKGTINSQGGYFVSQNLEMFDPGFFDMTRKEAETMDPTQRLLLECSYEALENAGIPKESISGRRVGVFIGGSDNEHRMGNLRDLDDAPMFDPTGSQGAFLAGRISYFLNLCGPTVTLDTACSSSILFADSGKTYAFDHRAKSGYARGEGAGCLILKPLHKALEDRDYVRAVISHTGVSHNGRTVGIVAPSSEEQESLLRNVLSQANIDAKDIGFFEAHGTGTRVGDPIEAKAIYKALSRKLDGCKPLSIGQQPIPRDKKYICVNNFGYSGSNAHAVLKALPEENEIEFLDANKFEGHIKMKRLFVISGNDEAAARKSMEQLGIFLEQHAELYQSTMPRNLA…
Annulohypoxylon_maeteangense_CBS_123835_GCA_022496945.1	g2607	KS-AT-DH-MT-ER-KR-xCP	MSSQRGETLNAIGQDGLPPIAIVGMACKFPGGASNPSKLWDMIARKQSGRCEIPKTRMNVDAFYHPDPDRNGTFNIRAAHFLEEDISAFDAAFFSISPAEATGMDPQQRMMMESAYEAVENAGVPMEDLSGSNTGCYVGCFSRDYNEMLTHDPETSPVYVSTGNGAAILSNRVSYFFDLKGPSLTVDTACSSSLVALHLACQSLRSGESKAAIVGGTNLIFNPDVMIAMSNVHFLGADAKCHTYDASANGYSRGEGIAAIYIKPLEDAIRDNDTIRAVIRGTACNQDGRTAGIMLPSREAQESLIRSAYKNAKCDPATVGYFEAHGTGTPAGDPLEAGAIGSTLGQHRGLGDENRLYVGSVKTNIGHLEGASGLAGIIKTVVALEKGLIPPNLYFEKGN…
Annulohypoxylon_maeteangense_CBS_123835_GCA_022496945.1	g6235	KS-AT-DH-MT-ER-KR-xCP	MDTDNSEWASEPIAIIGMSCKFSGGVSDPEKLWDLMASGKDGWSEIPIDRYDLKGVYHQNHERTSTTHVKGGHFLDDDVAAFDAAFFNYSAEMAQAIDPQFRLQLESTYEALENAGLPLSQVMGSQTSVFAGVFTHDYQEGIIRDEDRLPRFNVVGTWSPMSSNRISHFFDFRGASMTLETGCSTTLVALHQAIQTLRNREADMSIVTGANVMLNPDTFKAIGSLGMLSPDGRSYAFDSRANGYGRGEGVAALVIKRLSDALADNDPIRAVIRETALNQDGKTDTITTPSGSAQVELMRECYRRAGLDPRGTQYFEAHGTGTPAGDPIEAGAMAAIFSGGEGRDNEANYLRIGSVKTNIGHTEAASGLAAMVKGVLCLEKGLIPPSVNYETPNPKLKLK…
Annulohypoxylon_maeteangense_CBS_123835_GCA_022496945.1	g7350	KS-AT-DH-MT-ER-xCP	MSSSSDVDDGFAVVGLSFKLPQDAVDVDSFWNVMEERRNLMTDWPEDRAKLDSFNDGTSDKPNTLKTRLLSIRNNDGFWKLLTWLLKMALVVGSNALLSPESSLFMSNMNVLSPDSKCFSFDARANGYARGEGVIALVLKPLRDAIKNGDVIRAVIRASASNQDGRTPVLTQPSADAQELLIRHVYEKAGLDFSSTRYVEAHGTGTPAGDPVEMTAIGKVFRESRSPQEPLYVGTVKPNIGHLEGASGLASFLKAILVLEKGIIPPTALFETMNPQINADFYNVQVPTRCIPWPSPGLRRVSVNCFGSGGSNAHIILDDALNFLQSRGIAGYHHCVSSPSIVNAASNGNMLNIINDRVDSLRNGNYEKRDDSYTKGRRMRLLVWTAADSNAVRRTLTAY…
Annulohypoxylon_maeteangense_CBS_123835_GCA_022496945.1	g2106	KS-AT-DH-MT-KR-xCP	MSGYADYAEEPIAVIGSGCRFPGGSSTPSKLWDLLKAPRDVGSKIDRFSAEAFYHKDGSHHGTSNVLNSYLIEDDTRHFDAQFFSIPGSEAEGIDPQQRLLMEVVYEALESSGHQIEELSGSSTAVYVGVMCNDYAHITYHDLESLPKYAATGTASSILSNRVSYFFNWTGPSMTIDTACSSSLIATHQAVQSLRKGESNLAVAAGANLIFGPTNFVAESNVQMLSPTGRSRMWDSGADGYARGEGVAAVMLKRLSDAIRDGDTIECIVRETGTNQDGRTTGITMPSSVSQAELIRKTYSNAGLSPLTDRCQYFEAHGTGTKAGDPQEAGAIYRAFFGEKEESNDPNDVLYVGSIKTIIGHTEGTAGVAGLLKASLAVQNGIIPPNMLFENLNPDIKPY…
Annulohypoxylon_maeteangense_CBS_123835_GCA_022496945.1	g5702	KS-AT-DH-MT-KR-xCP	MTDTPLEPIAVIGFGCRFPGGADTPSKLWSVLRNPENLSKKPPTDRFNVDAFYHPVGTHHGTTNATQSYWLEDSERSNVAQFDAGFFNIQPAEVDAMDPQQRILMEVVYDGLCASGQPMEKLRGSDTAVYVGLMCDDYQSMLTSDWETFPRYTVTGVERGILANRLSYFFDWHGPSMTVDTACSSSMVALDQAVQVLRSGKSKMAVAAGANLILTPVMHINEASLGMLSPSGRCAMWDTSADGYTRGEGIAAVFVKTLSQALADNDPIQCILRETGVNQDGRTPGLTMPSSSAQAQLIRDCYARIGLDPVNNPRDRPQFFQAHGTGTQAGDPQEAAAISTAFFPSSSLAANEGDKMLVGSIKTVIGHTEGTAGVASIIATSLALKNGIVPPNLHFHNLN…
Annulohypoxylon_maeteangense_CBS_123835_GCA_022496945.1	g4492	KS-AT-DH-xCP-MT	MAYVSCITDVDRVTITISESHFIGFSRQLADGGLSAQPIGLCGRYHTTKPDRGELVQQAKTLCQQNQQFQFPAAEQLISPLRSTSDTEVITSGVLHEIALNCILVDVCKWYDTVQAALDAWDGQSVNVIPIGNSSGAIPRSLKSVTTVVDDFLTPSSRTSTPPFTTMPNSNLTTGQTTPCSLAPPPVTATTQPIAVIGMACRYAQADSLEEFWSLINSGKNATTPVPENRFKSSELWRTPKGPFFGNFIKDHDAFDHRFFGMSAREAASMDPQQRLLLQVSYEAMESAGYPDGAESPNRPIGCYVGAGYVEYEDNIASEHANAFSACGAIRAFISGRVSHYFGWTGPSVVFDTACSSSAVAIHNACKALQTNDCSIAIAAGVNVITSPTFYQNLAAASF…
Annulohypoxylon_maeteangense_CBS_123835_GCA_022496945.1	g2001	KS-AT-MT-ER-KR-xCP	MSGSSGHSTSYSSASSSFEEIKDATAPGSVPIAICGLGIRLSGGIRNADDFWDLLVNGRDARGPVPSSRYNADGFDGSLGGKERIETKFGYYLEDDLSRFDPSLFSMTQKELERCDPQQRLLLEVTRECLEDAGETNYRGKPIGCYVGTFGEEWQHMRDKDAQQVGSHLVTGSGDWMLANRVSYEYNLSGPSMVIRTACSASLIALHEACRAVQFGDASAAVVAGTNLILGPSLTMLMTSEGVLSPDGSCKSFDASANGYARAEGITAIYVKKLTDAIRDGNAIRAVIRGTAANSDGKSQGMLVPRGEALEALMRKIYSDAGLNPAETAFVECHGTGTSVGDPIETSAVGEVFGHDGVYIGSVKPNTQIELYQEYVSQHPSAIRDIAYTLALRRERLPH…
Annulohypoxylon_maeteangense_CBS_123835_GCA_022496945.1	g6240	KS-AT-xCP-Red	MPRYWEAVIEKIPEMAGTVDGARLLADLESWLRHGTAADDSLASDAEIPDIWIGFMMIAIQLDQYWRYLEFRFNDPAKGINDLQAELVQQHQSAGSDKVETVGFCAGMIAAVAVASSHNRQDFEKYGAAALRIGVMMAALVGACEAWSKGLGKGRSVSMATAWRNPKQGQDMARIVAAMPDAYVSVLFDESRATVTSSERLASRLIRQLRAAGITTIPLAFKGQLHTPGAERERHTEALIEICHAMPELQFPDASGLALPTYLDHPEGKPVSAEEIDLISVVLRSILANQLSWSSTVSKLVANGEDVSLIAFGLDRPVPTSAMARFGPKQVHFEDLEDHINKSLESSRKPHLSNDTGDHSETLVQDQSAETSRLSAKPEQDPEQVIAIVGMSVKTAGAD…
Annulohypoxylon_maeteangense_CBS_123835_GCA_022496945.1	g6449	SAT-KS-AT-PT-xCP-xCP-Te	MADQMAFLLFGDQSLDTHGFLADFYRRGNPGVLSKEFLRLAGDALKDEVERLPQEERRNIPTFRKLQQLNEKYHAQPVKFPGIDSALLCIAQLAHYIDRSEKEHGDVTDKSNTKLSGLCTGLFAATAIASSPSLSTLLPVAVQTVLMAFRTGCHVASLAERLSPSTGKSESWTYVLPAAQEAEAKSLLAEFHKEEALFSKDLFESRPTAIPVYGPYHAPHLHGLVDIRKMLRLDDEAVTTALAGSKPQSAVMSCVTGLPFPETDTKSLLAAVVHEILNEALIFHKTLSGNANEARDFKGSRILVIPYGPTQAASTLANVLRSQTKAEVILRPTPQVSRETTSASIGNHGSSGNCKLAIVGMAGRFPDSASHDALWDLLLKGIDAHRIVPADRFPVETHY…
Annulohypoxylon_maeteangense_CBS_123835_GCA_022496945.1	g2599	SAT-KS-AT-xCP-MT-Red	MVDMGGRPSGPLSGPTVLLFGPLALSFDEAAFAQVRKNVVENEDSHWVIDTVAEFPQIWKSLTTAIPSLKTASGLKQLEDLSDAFRTGRPLETSFPLPNKLLIPLVIVSHLSQYATFLRNSTEGEHIDPFTTSKIDRETLGLCTGLLSAFAVSSSGNSEQFKKYAAVAVRLALLIGTVVDAQDEATEPSKSLSAAWNSAGSGEELKSIVKSFPDTYVSVNYDDNRATITTKASTISKLLLQLRGAGLIASEVGLYGRFHASINLEKLALLLEFVNAHAEFQFPNASSGLAVPTRSNRGGDLITHGPLHQHALQSILAEPPQWFQTVSVVRDTTLKSKDSCILSFGPERAVPPSLLRGLNPQVIHVADLDNTSSRFESFSQKDLRTFSDNDVAVVGMSIK…
Annulohypoxylon_nitens_CBS_120705_GCA_022496965.1	g2191	KS-AT-DH-ER-KR-xCP	MVKVQFRQEPIAVVGFACRLPGGNHSPRKLWDFLERGEVASNKVPKSRFNIDGHYDGSHKPGTMRPPGGMFMGDIDLANFDASFFEIGGTEAIAMDPNQRQMLEVVVEGLENAGIPLEKLDGERVACFVGSYASDYGDMQNRDAEDRPANCAIGVGRSIMANRLSYYLNIKGPSITIDTACSGSLVGLDLACRSIQSGEVDAAIIAASNFYLNPDHVMDVGTVGQAHSPSGLCHTFDVDADGYVKAEAVSCLIVKRLSAAIRDRDPIRAIVKGTASNSNGRTGGIASPSSEAQADAIRAAYANAGITNFNETAYLECHGTGTQAGDPTEIKGIGSVFAPTRSKENPLLIGSIKSNIGHSEPAAGNSGLIKVILSMEQGVIPGTPLFINPNPKIDFEGFK…
Annulohypoxylon_nitens_CBS_120705_GCA_022496965.1	g4514	KS-AT-DH-ER-KR-xCP	MSDSSTVDAMEPIAVVGLGCRFPGNATSPTALWEMLREGRSAWSEIPKERMNIASYFHPSGNRQGTVPFMSAHFIDEDVRVFDTSFFSIPADEARAIDPQQRILLEVSVEALDSAGIDRDAIRKSDTGVWVGSFVKDYEQIVLRDPDDSPKYGATGNGIAIMSNRISYFLDVNGPSMTIDTGCSASLVCVHNACQSLRNREIDIGLAGGAGLILTPNTMMPMTALNFLSPDGKCYTFDARANGYGRGEGIGIVVLKRLTDAIRDNDSIRCVIRGSSVNQDGRTPGITLPSSEAQLRNIKSVYRRAGLSVDETAYVECHGTGTQAGDFREVKAISDAFCGDRTSDNPIYVGSIKTNIGHLEGCAGIAGLIKGVLAIEQGIIPKHLNFELPGNPAIKFDDW…
Annulohypoxylon_nitens_CBS_120705_GCA_022496965.1	g454	KS-AT-DH-ER-KR-xCP	MASVVRKPSVPVALVGISCRLPGGANSVDELWELLKRGGEAWTPVPNNRFNETAFHHPSADDPNGTSNHRGGHFINGDVRDFDHSFFRVSPQQAAAMDPQQRVLLEMTYEALENAGWLSENISGTSTAVYVAGFATDFNRNLCKDPLDVPVYYATGTEIAILSNRILHHFNLQGPSITLDTACSGGLVAMHQACQSLRDGESTAAIVAAANLTLGPDQNIGLSNIHLISGNGRSYPFDARGTGYGRGEGCVVYVMKLLDDAVRDRDPIRGVIRGTAINQDGYTPAGMTHPSGRAQADLIRTTYALSGLKPEDVAYVEAHGTGTDVGDREELAALAEVFVSSERAAPLYVGSIKGNIGHTENTSGLANVLKAALILEHQLIPPVAGFSVPKPGLPLDRIR…
Annulohypoxylon_nitens_CBS_120705_GCA_022496965.1	g5112	KS-AT-DH-ER-KR-xCP	MESEALMPIAIVGMSCRLPGDVSSPGDFWKLLTKGRSAWSKIPKSRFNQEAYNHPNPEKRGTINSQGGYFLSQNLEMFDPGFFDMTRKEAETMDPTQRLLLECSYEALENAGIPKESISGRKVGVFIGGPDNEHRMGNLRDLDDSPMFDPTGSQGAFLAGRISYFLNLCGPTFTVDTACSSSMHALHMAVQSIRSGESEQAIVAASHLITQPDIWVSMAKLRLFADSGKTYAFDHRAKSGYARGEGAGCLILKPLHKALEDGDYIRAVISHTGISHNGRTVGIVAPSAEEQESLVRNVLSQANIDAKDVGFFEAHGTGTRVGDPIEAKAIYKALSRKLDGHKPLNIGSVKSNVGHLENASGIISVMKAALMLEKGFIVPNADFEKENPAIPLSQWNLKI…
Annulohypoxylon_nitens_CBS_120705_GCA_022496965.1	g5176	KS-AT-DH-ER-KR-xCP	MTKANHYRQDPIAIVGFGCRLPGNNTSPQKLWDFLERGDIASRDVPKSRFNIEGHHDGSLKPKTMRQPGGMFLDNVDLADFDAGFFEIGRSEAISMDPNQRQMLEVVFEGLENAGITLEDLNNQPVGCFVGSYASDYADMHSRDPEDRPANNAVGVARALLANRLSHFLNIKGPSVTIDTACSGSSQGLEVACRYLQSREIDAAIIATSNLYMSPEHLIDTGAFGTAHSLMDDAIANRDPIRAIILGTATTSNGRTPGIASPSAASQALAIAAAYSNAGIEDLNQTTYVECHGTGTQAGDPTEVAGIGSVFAATRPADKPLLIGSIKSNIGHSEPAAGISGLLKAVLSMENSFIPGTPTFINPSPKIDFIGNRVKAFRGGIPWPKDAPRRASINSFGVG…
Annulohypoxylon_nitens_CBS_120705_GCA_022496965.1	g5377	KS-AT-DH-ER-KR-xCP	MAPSATNGSAYGTSNGVHEDSRAPTNGYTNGHTNGHTNGFTNGSTQPNGNSNGTNGHHPQPFGHTNGHRVGQTNGLSNGHVNGGSNGGSNGLNGSSPSSIKDKSQPIAIVGMSCRLPGNVASPAEFWELCARARSGYSEIPKERFNTASFYHPNPGKAGSHNPVGGHFLNTDLTAFDAPFFSLTEKEAISMDPQQRLLLECTFEALENAGIPKHTIIGKEVGVFVGGSFPEYESHLFRDPDTIPMHQATGCAYAMQSNRLSHFFDLRGPSFTTDTACSSSLVALHVACQSLRTGESNMAIVGGCHLNMLPEFWISFSKSRLFSDSGRSFSFDSRGTGFGRGEGCGMVILKPLEQARRDNDQIRAIIVGSGINQDGKTPGITMPSGDAQETLMRQVYTNA…
Annulohypoxylon_nitens_CBS_120705_GCA_022496965.1	g6232	KS-AT-DH-ER-KR-xCP	MPELHIDTYNHLPTWNLRSPELPSKGADNMDPISDMSTSTDSSTSFHFVDDLKNGSQTESRSYPSKPDDDVICVVGMACRLPGDVHSPAELWDFLVKKKTGQCRVPAQRFNINGFYNKDDSRAGVMSADGGYFLNEDVRQFDNTFFGINNLEATYLDPHQRKLLEVAYECFESAGLSMEDVSGTNTGVYVSNFTVDYTNMHFQDPDYLHRYSSTGSNMAIIANRISHVFNLHGPSLSLNTACSSSLYCLHTAVRAISAGDCDDAIVAGANLIMSPEQHLETMKGGVLSGRSSCHTFDESADGYGRAEGVNAVYLKRLSSALRDGNKIWGVIRATAVNSNGRTPGIAQPSADLQEAVIRKAYTHAGLDFPDTDYIECHGTGTSIGDKIEVDALGRCFASR…
Annulohypoxylon_nitens_CBS_120705_GCA_022496965.1	g8176	KS-AT-DH-ER-KR-xCP	MDSTTFKPIAIVGIGCRLPGSISNPSQLWEFLDQRRSAGGKLPESRFNIDSYHGGKDQPAITEALGGYFIQEDIRDFDNQFFGINNREASVMDPQQRKLLEVVFESFESAGVSLDDASGANIGCYVASFTPDFIAMQTKDVESLSRYSQIGMGTTILANRISHVFNLKGPSCVLDTACSSSLYALQAACSALLADECDSAVVAGVNLVQTPELHVAISQAGVISPSSTCHTFDTSADGYGRADGVNAIFIKRLDDALRDGDPIRSVIRSVAVNSNGRTPGITQPSIDGQEAVIRKAYARAKLNPSDTPFVETHGTGTGVGDPIEVEALSRVFKKAERNNPLLLGAVKTNLGHSEAASGLTSIIKATLMLERGQIPATIGLKQLNPKLKIDDWGVQIVTS…
Annulohypoxylon_nitens_CBS_120705_GCA_022496965.1	g9270	KS-AT-DH-KR-xCP	MVYKRPSSEPVAIVGSSCRFAGGATSLAKLWQVLCEAPDLSKEVPPERFNATAFYHPDGEYHGTTNSIKAYWLQQDHRVFDASMFNITPKEAEAIDPQQRMILEVVYEAMESAGYTLDKYYGKNVAVFSGVMTGDHDTLSQRDELSTSQYYATGNARSIISNRISYFFNFRGPSMTIDTACSSSLVALHQAVLSLRSGESTMACVTGVNLMLTPEQFLVESSLHMLSPTGKSQMWDESADGYARGEGVAALLLKPLSRALADGDQIMAIVRDTGVNSDGRTKGITLPNPEAQSSLIKDTYRRTGLDSIIPEDQCQYFEAHGTGTPAGDPREAEAISKAFFDPCTGGISAADTGNILVGSCKTVLGHTEGAAGLAGLLKVIQSMKHEKVPPNLHFSSINP…
Annulohypoxylon_nitens_CBS_120705_GCA_022496965.1	g6511	KS-AT-DH-KR-xCP-C	MTSHMATNGQEIAIIGSGCRFPGDATSPSKLWALLRNPRPVASDVAPLRGYYHENGQYHGHANVKEAYLLAGERANQCFDAAFFNISPMEANVLDPQIRLLLETVYEALEAGGQTMDMLKGSDTAIYAGQMVNDYELLMARDYENLGRYHATGTSRAMLSNRISYFFDWHGPSLTMDTACSSSLVALHHAVQQIRSGSSRVAIVAGSNLIHDSMPFIAETNLQMLSPEGRSRMWDADANGYARGEGVAALVLKTRLAAEADGDHIECIIRETAVNQDGKTAGQTMPSSFAQSQLIQDCYERAGLDLANPIHRPQYFEAHGTGTPAGDPVEAEAISSALFPEGGTSSSPLFVGSIKTVIGHTEGAAGVAGILKASLAIQNAMIPPNLLFNRLNPRIKPFY…
Annulohypoxylon_nitens_CBS_120705_GCA_022496965.1	g2633	KS-AT-DH-MT-ER-KR-xCP	MLTPNTTSNGVGVDEHFVPNGLKLNDETMANGSLVNGNGNIKQSSNGIKVNGSSINGESVNGWLKNGHYTNGNHIAGVPVNGDASGGAMPIAICGMALRLPGGLTTPQELWEFLLAKGDARSRVPQSRYNLSAFYSPTGKPGTVSTEHGYFLDDSVDLGALDTSFFTMPRTEVERADPQQRLLLEVARECFEDAGVTNWRGKTIGCYVGNFGEDWLEMFTKETQQWGMHRVVGTGDFVLSNRISYEMDLRGPSMTIRTGCSAALVGLNEACMAISRGDCEAALIGGVNLILGPNMTTALAEQGVISNDGSCKTFSAEANGYARGEAVTAIFIKPLSDALRDGNPVRAVIRATSHNVDGKTPGMSQPSTEAQEALMRRAYKVAGIRDFSQTAMVECHGTG…
Annulohypoxylon_nitens_CBS_120705_GCA_022496965.1	g2781	KS-AT-DH-MT-ER-KR-xCP	MTDSPVMTTGTQLCGSECPEPIAIIGMGCRWPGGVRNPSQLWDLLKEKRDGWREFTSDRINVDGFYHPNRQRPGSMATMGGHLLQEDPRLFDHSFFGITATEATSMDPSQRKLLEVTYEAFDSACVPLEKVSGSRTGVFVGNFNNDHQLMQLRDPNLTLPYAVTGGGPTILSNRINYVFNLQGPSMVVDTACSASMYALHLAVLSLRNGDCDGAIVAGGNLILGPDHQIITSKLGAASPTSRCHTFDARANGYSRAEGFGAIYLKRLSSALDDGNPIRAVVRGTSFNANGKTGGITHPSPEGQEAVIRQAYKAAGNLDPNLTGYFECHGTGTPVGDPIEVAALGNVFASGRQDEPLLIGSIKPNLGHSEAASAMAQLMKGILSLEHNEIPATIGIKTFN…
Annulohypoxylon_nitens_CBS_120705_GCA_022496965.1	g2883	KS-AT-DH-MT-ER-KR-xCP	MSGSSGHSTSYSSASSSFEEIKDTTTPGSVPIAICGLGIRLSGGIRSADDFWDLLVNGRDARGPVPSSRYNVDGFDGSLSGKERIETKLGYYLEDDLSRFDPSLFSMTQKELERCDPQQRILLEVARECLEDAGETNYRGKPIGCYVGTFGDEWQNLRDKDTQHVGNHLLTGSGDWMLANRVSYEYNLSGPSMVIRTACSASLIALHEACRAIQFGDASSAVVAGTNLILGPSLTTFMTLEGVLSPDGSCKSFDASANGYARAEGITAVYVKKLTDAIRDGNPIRAVIRGTAANSDGKKQGMLMPRAEALEALMRKIYTDAGLNPAETAFVECHGTGTSVGDPIETSAVGEVFGQSGVYIGSVKPNVGHCEGSAGLASLIKAVLALENKTIPPNIKFST…
Annulohypoxylon_nitens_CBS_120705_GCA_022496965.1	g3065	KS-AT-DH-MT-ER-KR-xCP	MGSANYSDGGVLRPLAVVGMSFRFPGGSTSDQSFWDMLVSKRCASADVPPDRFNIEAHYNPDTRRLDTLSCRGGHYIDGKADAFDAGFFGIGAVEASSMDPLHRISLEESFRAFENAGLSLQDVAGTKMCVFSGCLSPDYVTICHKDTYSPNQYHATGSAINMLANRVSWWFDLRGPSVTVDTACSSSLVALDLACKSIWAGDATMGLVCGANMMLTPESQLYLNNLGMLSKDSRSYSFDHRANGYGRGEGVGVIIVQPLDEAIRDGRTIRAVIRSTCSNQDGKTPGITQPSREAQYRLIIDAYAKAGLTMDHTRYFEGHGTGTPLGDPVEAAAIGQAFRAYRSPRDPLYLGSVKSNIGHLEGGSGVAGVIKAILALENGVIASNADFERINPQIDAES…
Annulohypoxylon_nitens_CBS_120705_GCA_022496965.1	g351	KS-AT-DH-MT-ER-KR-xCP	MSSQRSETLNAIGQDGLPPIAIVGMACKFPGGASNPSKLWDMIARKQSGRCEIPKSRMNVDAFYHPDPDRNGTFNIRAAHFLEEDISAFDAAFFSISPTEATGMDPQQRMMMESAYEAVENAGVPMEDLSGSNTGCYVGCFSRDYNEMLTHDPETSPVYVSTGNGAAILSNRVSYFFDLKGPSLTVDTACSSSLVALHLACQSLRSGESKAAIVGGTNLIFNPDVMIAMSNVHFLGADAKCHTYDASANGYSRGEGIAAIYIKPLEDAIRDNDTIRAVIRGTACNQDGRTAGIMLPSREAQESLIRSAYKSAKCDPAAVGYFEAHGTGTPAGDPLEAGAIGSTLGQHRGLGDGNRLYVGSVKTNIGHLEGASGLAGIIKTVLALEKGLIPPNLYFEKGN…
Annulohypoxylon_nitens_CBS_120705_GCA_022496965.1	g5180	KS-AT-DH-MT-ER-KR-xCP	MDPSIPIAVIGMSCRFAGGVKNPEDLWRLCAEGRTAWSEIPSSRFNADGVYHPNRENIGTAMDPQFRLQLETTYEALENAGITIQQVAGSNTSVFAGAFFRDYSDAHTRDPETLPRFLLLGVGSSMASNRLSHFYDLRGASMTIDTACSTTLTALHQACVSLRTGESDMSVVGGANVMLNPDNFQVMSSLGLLGPTGRSFAFDSRAEGYGRGEGTATVVLKRLDDALRDNDPIRALIRATGVNQDGKTDNITTPSQLAQEELMQTCYAKAGLDPGSTDLFEAHGTGTPTGDPIEARAIASVFKKRRAGRPVRLGSVKTNVGHTETASGLASIIKVALALEKEQIPPSANFERPNREIDLDALNLKVPLEVEPWPQESRFQRASVNNFGFGGANAHVIME…
Annulohypoxylon_nitens_CBS_120705_GCA_022496965.1	g5552	KS-AT-DH-MT-ER-KR-xCP	MTPVMNDDIAIVGFALKLPQDVNDVSSFWEVLENRRNLMTEWPESRINNGSFEASKEGNVRCRGGHFITEDPGAFDAPFFSVTAKEAASMDPMQRWTLEASYHAFENAGIPAEQLRGTRCGVFSASMTDDYKRMIAQDPDNIPRMAVTGTFASILPNRVSWYFDLHGPSIHVDSACSSSLLALDLACQALRTGEASSAVVTGSNLILGPTIYQMLSSLNFLSADSKCYSFDHRANGYARGEGVIALVIKPLWDAVQDGDMIRAVIRSTSSNQDGHTPGLTQPSPQAQEDLIRQVYKKANLPLNVTRYFEAHGTGTPVGDPIEMKAIGRVFRTSRSNEDPLYVGSVKANIGHLEGSSGLAGVLKSVLMLEKGIIPANANFEKINPKIDVDFYHTKVPSEN…
Annulohypoxylon_nitens_CBS_120705_GCA_022496965.1	g7429	KS-AT-DH-MT-ER-KR-xCP	MALDSHASIRPYDEQYQDNGDTIAQDLLASNDDPIAICGFSMMLPQGASSPQKFWDMMMEKRCATTEFPSDRLNVNGFQRESQSGNTLPLRGGHFLGENISAFDADFFSISSTEAAAMDPMQRMMLEVSYAALLNAGITMADISGSRTAVYTGSFGVQDYLLQMARDPENPSTHAIIGTGLSMLANRISWFYDLHGPSVGIDSACSSTTMAIDMACQALHSGSCDTAMIAGCNLAASPEHYIWLSNMDFLSKDSRCYAFDHRANGYARGEGIGVIILKKLSLALRDGNTIRAVIRSAGSNEDGRTPSITFPSRSAQEELIRDTYRKAGLSLAYTRFFEAHGTGTAAGDPVEANAIGSVFRQYRTAESPVYIGAVKSNVGHLEWASGLVAVIKTILVLEK…
Annulohypoxylon_nitens_CBS_120705_GCA_022496965.1	g6621	KS-AT-DH-MT-KR-xCP	MSGYADYAEEPIAVIGSGCRFPGGSSTPSKLWDLLKAPRDVGSKIDRFSAEAFYHKDGSHHGTSNVLNSYLIEDDTRHFDAQFFSIPGSEAEGIDPQQRLLMEVVYEALESSGHQIEELSGSSTAVYVGVMCNDYAHITYHDLESLPKYAATGTASSILSNRVSYFFNWTGPSMTIDTACSSSLIATHQAVQSLRKGESNLAVAAGANLIFGPTNFVAESNVQMLSPTGRSRMWDSGADGYARGEGVAAVMLKRLSDAIRDGDTIECIVRETGTNQDGRTTGITMPSSVSQAELIRKTYANAGLSPLTDRCQYFEAHGTGTKAGDPQEAGAIYRAFFGDKEQSDDPNDVLYVGSIKTIIGHTEGTAGVAGLLKASLAVQNGIIPPNMLFKNLNPDIKPY…
Annulohypoxylon_nitens_CBS_120705_GCA_022496965.1	g8287	KS-AT-DH-MT-KR-xCP	MTDTPLEPIAVIGFGCRFPGGADTPSKLWSVLRNPENLSKKPPTDRFNVDSFYHPVGTHHGTTNATQSYWLEDSERSNVAQFDAGFFNIQPAEVDAMDPQQRILMEVVYDGLCASGQPMEKLRGSDTAVYVGLMCDDYQSMLTSDWETFPRYTVTGVERGILANRLSYFFDWHGPSMTVDTACSSSMVALDQAVQVLRSGKSKMAVAAGANLILTPVMHINEASLGMLSPSGRCAMWDTSADGYTRGEGIAAVFVKTLSQALADNDPIQCILRETGVNQDGRTPGLTMPSSSAQAQLIRECYARIGLDPVNNPKDRPQFFQAHGTGTQAGDPQEADAISSAFFPPNSPAVDDGNKMLVGSIKTVIGHTEGTAGVASIIATSLALKNGIVPPNLHFRNLN…
Annulohypoxylon_nitens_CBS_120705_GCA_022496965.1	g2573	KS-AT-DH-MT-KR-xCP-C-A-xCP-Red	MTTQEPIAIIGSGCRFPGNANTPSALFDVLRNPQDLLSSIPEDRFSTRGYYHENGQYHGHTNVRQSYLLSGESTHRRFDAQFFGISPAEANVIDPQMRLLLETVYEALEDAGQTIKGLQGSNTAVYAGLMTSDYEHIMGRDEDAMGTYHVTGTAKSLLSNRISYFFDWHGPSMTIDTACSSSLYAVHHAVQQLHSGASRVAVAAGSNLLLDPIGYIGESKLQMLSPGSRSRMWDASADGYARGEGVAAIILKTLSDAEKDGDKIDCIIRETAVNQDGRTKGITVPSAEAQANLIRDCYKRAGLDISNPADRPQFFEAHGTGTPSGDPIEAEAISSVFFDRNAISTTNHKPLLVGSIKTVLGHTEAVAGIAGILKASLSLQHSIVPPNLLFNRLNPKIKP…
Annulohypoxylon_nitens_CBS_120705_GCA_022496965.1	g4732	KS-AT-DH-MT-KR-xCP-Red	MMSSTPTLPLYEPIAIVGSACHFAGGVNNPSKLWKLLRSPRDVRSEISESRFNAKRFYHPNHAHHGHSNVMHSYLIEDDIRAFDAEFFGIKPIEAAVIDPQQRVLMETVYESIEAAGMKIENLKHSDTGVFIGAMCADYEAMQFRDLDSVPTYLATGSARSILSNRISYFFDWNGPSMTIDTACSSSLVAVHLAVKALRSGESKLAIVGGSNLILGPESYIMESKLKMLSPDGVERMWDKDANGYARGDGVAAIVLKPLSSAISDGDHIECVIRETGVNQDGATMGITMPSVAAQQALIEATYAKAGLDLRDLNDQPQLFEAHGTGTPAGDPIEAEAISSAFIGHGKLVRSEDNPLFVGSFKTILGHTEGTAGIAAILKASLEIQHSQITPNLHFETLS…
Annulohypoxylon_nitens_CBS_120705_GCA_022496965.1	g5330	KS-AT-DH-xCP-MT	MHTTTPKSAGNTLLLFGPQLVRLVPSRLVDLRRTVIEDPNLEFLVEIIKDLPLLWANTIQPSVPCLGSLENAKEKLQQIVTFFENETEEAPRLAPPYNLLLAPLSVIAQIAEYVHHGHQGTAQGFCIGFLSAAAVASARNKTELEGLTATAVRLAVAIGGFVDFDEQQRLDGQTTLEQSSTWSVRWTSALEKEHFEKTLASFPETTPYSTVPPPVTGTTQPIAVIGMACRYAQADSLEEFWSLINSGKNATTPVPENRFKSSELWRTPKGPFFGNFIKDHDAFDHRFFGMSAREAASMDPQQRLLLQVSYEAMESAGYADGAESPNRPVGCYVGAGYVEYEDNIASEHANAFSACGAIRAFISGRVSHYFGWTGPSIVFDTACSSSAVAIHNACKALQT…
Annulohypoxylon_nitens_CBS_120705_GCA_022496965.1	g330	KS-AT-xCP-MT-Red	MQDTVADLPRLWGVIIESFPDLGILPGEKLLSDLEKWLRNGIDQGQDMKLPNIILTPLVVIAQLTQYWRYLELNFKEVAGPGTRDLHASFIQQDVETLGFCTGLLSAFAVSCSYNEHDLKKYGAVAIRLAMLIGAFLDVRDNSEDDYGSAKSYALAWNDDEQDTEMRRVIGGFPEAYISVQYDERRVTLTIREATGPTLLQQLKEVGIAATEVGLQGRFHYARNNQDVESLVQFCNSNTDFQFSDGSNLALSTYANNGGDKIEDGKMHELALRAILVEQSKWYQTFAALQASKLNKQDSVVVSFGLDRFVPPSLMHGLGPRLIHFADLDKDAPEADSGNTQTIGDNDIAVVGMSIKVAGADDTNEFWEILSKGQSQHQEVPESRIGFKTHWRDLDTERK…
Annulohypoxylon_nitens_CBS_120705_GCA_022496965.1	g520	KS-AT-xCP-MT-Red	MVSIGERQGGPLPGSTILLFGPLALSFDEAAFAQVRKNVVENEDSRWVIDTVAEFPQIWKSLTTTIPSLKTASGLKQLEDLSDAFRTGRPLETPFPLPNKLLIPLVIVSHLTQYATFLRNSTEGEHVDPFTTSKTNRETLGLCTGLLSAFAVSSSGNSEQFKKYAAVAVRLAMLIGTVVDAQDAATEPSKSLSAAWSSAESGEELKRIVKNFPETYVSVNYDENRATVTTKASAISKLVLQLRSAGLIASEVGLYGRFHASINLEKLGLLLEYVNAHTEFQFPNASSGLVVPTRSNRGGDVIAHGPLHQHALQSILAEPPQWFQTVSVVRDATLKSKDSCILSFGPERAVPPSLLRGLNPQVVHVADLESTSSRFESFSQKDLRTFSDNDVAVVGMSIK…
Annulohypoxylon_nitens_CBS_120705_GCA_022496965.1	g5313	SAT-KS-AT-DH-xCP-MT	MTKFGASASSHTQEFVVALFGPQVTYWTRDTLSSLQSDLLRNPNFQFLTKSLLELPSLWSLLEQDFASENFHGADSLKSLHDFATGEKLLDPQTLTNTHLAPLTVVSHVVDFIRSVDNPYTKESLLSFEAAQGFCIGFLSAAALASASDWSAFEQNASNAIRLAACIGVVVDKEEASHAAQDRATAISVYWKTAADRTFLETCLDNIPQAYISCITDDRSFTVTLPKGDEEAFCARLREAKIPTSLVGLNGSYHHSRHIETADKLVKLCSKNSNLRLPDAESLRLPLRSTADGSVIKTGAIHEIAIQLILCKRAHWFQTVKSTLGDLTPNKATFVSLGTKSCIPRSLSPGKQTHDDEGALEEIAVVGMACRFPQADTLEEFWEIISAGKTALSTMPLDR…
Annulohypoxylon_nitens_CBS_120705_GCA_022496965.1	g2970	SAT-KS-AT-DH-xCP-xCP-Te	MYRVAVFAGLGSETLFSRTTLDTAVQDASLPESQIILRACHAAFRKQIAKAIEQGHLSLESVDLDDFTEPESLIQPPLTYHHNVVIQHTAIYLIQILRFLRHSRGTHDVQGVAGFCAGLLPAAVVATSHNVIEFMQRAQDFFHVTLWLGINSESYRQAVLSQGGCSPDLPWSMVVHNISDEIITRLISDDQAPIYVSARNSPGCVTLSGEGHQLAQFIEKLPSQCRTRPTNVLSLYHNRHRLREIFNQTVKTLERQLSSQWEVPVAPAAPLFSTITGEPLSFSVQSETSITLGRLVSLLLEMILLEPVDWASVQDKILSDVQQRVDSEECEILNFGPGYGVSKSIQKLPQTAEIRDVSAAGASASDSSASGISMDDIAIVGMAVDLPGASDADELWDNL…
Annulohypoxylon_nitens_CBS_120705_GCA_022496965.1	g4996	SAT-KS-AT-PT-xCP-xCP-Te	MADQMAFLLFGDQSLDTHGFLADFYRRGNPSVLSKEFLRLAGDALRDEIDRLPREERRKIPIFRTLQQLNERYHAQQIKFPGIDSALLCIAQLAHYIDRSEKEHGDVTSKQNTKLSGLCTGLFAATAIASSPSLSTLLPIAVQTVLMAFRTGSHVASLAERLSPSTDKSESWTYVLPAAQEAEAKSILAEFHKEEGISQAAHAYVSAVSANNIAISGPPATLRSLFSKDLFESRPTAIPVQMLRLDDEAVATALAGSKPESVVMSCTTGLPFPQTDTKSLLTAVVHEILNEALIFHKTLSGNANEARGFQGSRILVIPYGPTQAASTLANVLRSQTQAEVILRPAPQVSRETTATSIGNHGSTGNCKLAIVGMAGRFPDSASHEALWELLEKGIDAHRV…
Annulohypoxylon_nitens_CBS_120705_GCA_022496965.1	g7752	SAT-KS-AT-xCP-MT	MGSPGNEPHTQGPVILFFGPEIPSFSNQSLLELRLALRNREWATEALSTLHPTWDLISTKIPFLDKIPGKRQLGDLETWLREEPPEKPVGDLPNVVLAPLTVFTQLVQFQQYSERENSTERGTHTAPPRLIPLGFCMGLLSAFTVAHCKDAASWNYYAAVAIRLAMIIGAAVDATDVSSHLGTFESMAVSWQDSEQERKLESIVDGSRGCAYISVRSDERRSTVAVSKYYAPKMLEELRKAGISAVSTGLRGQFHSDYHGELRDDILRLCDSKPSWFQFMDERACVEADHISQPQNLHRIVIEAILLKECNWYGTVLALVNSHTMNGGRLTSVSFGQGRFIPPSLQSKFDNRFEQLMPQGESPPPQSTANLPASNDEELPSTNNVSHPYDSHITEEKDV…
Annulohypoxylon_nitens_CBS_120705_GCA_022496965.1	g9432	SAT-KS-AT-xCP-MT-Red	MTKTFQQNLGTVPTVLLFGSLALSFDATTFHQLRKSITRTKSLTWLLKVLSNLADDCEVIFAAIPTLNQEDIHDQLLNVRDALTTGRSLRIVGHIPNTILIPLVVATQLAQYVALLEHCSLTHEQYIAKGDKETLGLCTGLLAGFAVAGSHDQTDLEKYGAAAVRLGMLAGLVVDLKNVINPSKSLSVGWSSPETRDAMIQALKDVPEAYISVEYDDNRATITAAASAASQLQSKLRLLGLAASEIGLYGRFHSTENNEILEQVLAHCDKHAEFQLPDASSSAIPTRSGYVDRKCVTQGTLHAHALLAILVESPTWYLTLDAALAEKEDTTILLSFGFERCVPSSVLRKLGTRLIHLEDSTVKGATFKREQEEQGCSERPWKDSDIAVVGMACKLPGAN…
Annulohypoxylon_nitens_CBS_120705_GCA_022496965.1	g9695	SAT-KS-AT-xCP-MT-Red	MASTLLHHEKESRAVLIFGSQPLDFTHETASELRAAVLKNPALEWVPEVLAELQHRWDIVTNDMPELRAFPGGELLCDLDDWLRTGSFPRGLAAFPLPNILLTPLIVITHLLQYLNFKSSGNMEHDRNCEILGLCSGLLSAVAVSSAADDLQLRKFGTVAIRLAMIIGAIVDAQNCDTDGQPIWASFSAAWASADLDNALSAVLPEFPDAYISVISDERRVTVTCRKCDVAGLQQRLNALGLTTTRLGLRGSFHSPQHAASAEALIRLCDEPQALLRFPDAAELVQTMRDDSGGYIKTGSLHRKVIRSILTEQANWKRAFAALNTPSCAASFGLERCVPTWLSRKLGTRLIHVTSLDTADGEKRLCSGICNSQHGLSDNDDAVAVVGMSCLLPGAPDLE…
Annulohypoxylon_sp._FPYF3050.1_FPYF3050.1_GCA_040938065.1	g2087	KS-AT-DH-ER-KR-xCP	MAPSATNGSAYGTSNGVHEDSRAPTNGYTNGHTNGHTNGHTNGFTNGSTHANGNSNGTNGHHDQPFGHTNGHRVGQTNGLSNGHVNGGSNGVSNGLNGSVPPSIKDKSQPIAIVGMSCRLPGNVASPAEFWELCARARSGYSEIPKERFNTASFYHPNPGKAGSHNPVGGHFLNTDLTAFDAPFFSLTEKEAISMDPQQRLLLECTFEALENAGIPKHTIIGKEVGVFVGGSFPEYESHLFRDPDTIPMHQATGCAYAMQSNRLSHFFDLRGPSFTTDTACSSSLVALHVACQSLRTGESNMAIVGGCHLNMLPEFWISFSKSRLFSDSGRSFSFDSRGTGFGRGEGCGMVILKPLEQARRDNDQIRAIIVGSGINQDGKTPGITMPSGDAQETLMRQV…
Annulohypoxylon_sp._FPYF3050.1_FPYF3050.1_GCA_040938065.1	g3652	KS-AT-DH-ER-KR-xCP	MESGALMPIAIVGMSCRLPGDVSSPGDFWKLLTKGRSAWSKIPRSRFNQEAYNHPNPEKRGTINSQGGYFLSQNLEMFDPGFFDMTRKEAETMDPTQRLLLECSYEALENAGIPKESISGRKVGVFIGGPDNEHRMGNLRDLDDSPMFDPTGSQGAFLAGRISYFFNLCGPTFTVDTACSSSMHALHMAVQSIRSGESEQAIVAASHLITQPDVWVSMAKLRLFADSGKTYAFDHRAKSGYARGEGAGCLILKPLHKALEDGDYIRAVISHTGISHNGRTVGIVAPSAKEQESLVRNVLSQANIDAKDVGFFEAHGTGTRVGDPIEAKAIYKALSRKLDGQKPLNIGSVKSNVGHLENASGIISVMKAALMLEKGFIVPNADFEKENPAIPLSQWNLKI…
Annulohypoxylon_sp._FPYF3050.1_FPYF3050.1_GCA_040938065.1	g3720	KS-AT-DH-ER-KR-xCP	MTKANHYRQDPIAIVGFGCRLPGNNTSPQKLWDFLERGDIASRDVPKSRFNIEGHHDGSLKPKTMRQPGGMFLDNVDLADFDAGFFEIGRSEAISMDPNQRQMLEVVFEGLENAGITLEDLNNQPVGCFVGSYASDYADMHSRDPEDRPANNAVGVARALLANRLSHFLNIKGPSVTIDTACSGSSQGLDVACRYLQSREIDAAIIATSNLYMSPEHLIDTGAFGTAHSPMDDAIANRDPIRAIILGTATTSNGRTPGIASPSAASQALAIAAAYSNAGIEDLNQTTYVECHGTGTQAGDPTEVAGIGSVFAATRPADKPLLIGSIKSNIGHSEPAAGISGLLKAVLSMENSFIPGTPTFINPSPKIDFIGNRVKAFRGGIPWPKDAPRRASINSFGVG…
Annulohypoxylon_sp._FPYF3050.1_FPYF3050.1_GCA_040938065.1	g4533	KS-AT-DH-ER-KR-xCP	MPELHIDTYDRLPTWSLRSPELPSKGTDDMDPISDMSTSTDSSTSFHFVDDLKNGSQTESRSYPRKFDDDVICVVGMACRLPGDVRSPAELWDFLVKKKTGQCRVPAQRFNIDGFYNNDDSRAGVMSGDGGYFLNEDVRQFDNTFFGINNLEATYLDPHQRKLLEVAYECFESAGLSMEDVSGTNTAVRAIAAGDCDDAIVAGANLIMSPEQHLETMKGGVLSGTSSCHTFDESADGYGRAEGVNAVYLKRLSSALRDGNKILGVIRATAVNSNGRTPGIAQPSADLQEAVIRKAYTHAGLDFPDTDYIECHGTGTSIGDKIEVDALGRCFASRQGLPLMIGSIKSSMGHSEAASGLTSLIKVLLAFEHASIPPTFGVKKLNPKLRLDSFNMKVVTEAE…
Annulohypoxylon_sp._FPYF3050.1_FPYF3050.1_GCA_040938065.1	g6423	KS-AT-DH-ER-KR-xCP	MSEYSSIAEPTPVSDGTNDCICVVGLACRLPGGVKSPSGLWELLANKRCTQGQVPPERFNIHGFHCEDNDRAGVMSADGGYFISEDVRSFDNSFFGINNVEATYMDPLQRKLLEVVFECFENAGVPLDQISGSKTGVYTGDFTTDYQIMHMRDPDYLHRYSSIGSNKSILANRISHVFNLQGPSLTLNTACSSSIYCLHTAISALNAGDCTGAIVAAANLITSPEQYLETMRAGVLSQTSTCHTFDESADGYGRAEGVNAIYIKRLSSAIRDGDKIWGVIRATALNANGKTLGISQPDASLQEEVIRKAYAEAGLCFADTDYVECHGTGTAVGDAIEVDALKRCFSPREGHPLMIGSVKTNLGHSEAASGLTSIIKVLLAFDRDKIPPMYGVTKLNPKL…
Annulohypoxylon_sp._FPYF3050.1_FPYF3050.1_GCA_040938065.1	g6938	KS-AT-DH-ER-KR-xCP	MNFTETDSAPPRDSHASPTSKGVRQQQELIAVVGIGWKLPGDTADTEKLWQLLLNGKSGHGPVSPSRYNASAFYHPHHENPGTINSTSGYFLNDDPREFENGFFGISNVEAINMDPQQRKLLETVFECFESAGATLEELNGTNVGCYVGTFSLDYPVMQLADTENLNRYTATGITPTLLANRISHVFNLQGPSFTIDTGCSSSLYSLHCACTALDLGECDAAVVAGANLIQIPQQQILANKAGIISNSATCRTFDISADGYGRADGIGALYLKRLDDAIQNGDPIRGVIRGTAINSNGRTPGVMQPSADGQEKVMRQAYARAGLSVNDTDYVEAHGTGTAVGDPIEVDAISRVFSRSIQRPILIGSVKTNLGHSEPTSGITSVIKVILAMENRIIPPTI…
Annulohypoxylon_sp._FPYF3050.1_FPYF3050.1_GCA_040938065.1	g7289	KS-AT-DH-ER-KR-xCP	MSDSSTVDAMEPIAVVGLGCRFPGNATSPTALWEMLREGRSAWSEIPKERMNIASYFHPSGNRQGTVPFMSAHFIDEDVRVFDTSFFSIPADEARAIDPQQRILLEVSVEALDSAGIDRDAIRKSDTGVWVGSFVKDYEQIVLRDPDDSPKYGATGNGIAIMSNRISYFLDVNGPSMTIDTGCSASLVCVHNACQSLRNREIDIGLAGGAGLILTPNTMMPMTALNFLSPDGKCYTFDARANGYGRGEGIGIVVLKRLTDAIRDNDSIRCVIRGSSVNQDGRTPGITLPSSEAQLRNIKSVYRRAGLSVDDTAYVECHGTGTQAGDFREVKAISDAFCGDRTSDNPIYVGSIKTNIGHLEGCAGIAGLIKGVLAIEQGIIPKHLNFELPGNPAIKFDDW…
Annulohypoxylon_sp._FPYF3050.1_FPYF3050.1_GCA_040938065.1	g8345	KS-AT-DH-ER-KR-xCP	MDSTAFKPIAIVGIGCRLPGSISNPSQLWEFLDQRRSAGGKLPESRFNIDSYHGGKDQPAITEALGGYFIQEDIRDFDNQFFGINNREASVMDPQQRKLLEVVFESFESAGVSLDDASGANIGCYVASFTPDFIAMQTKDVESLSRYSQIGMGTTILANRISHVFNLKGPSCVLDTACSSSLYALQAACSALLADECDSAVVAGVNLVQTPELHVAISQAGVISPSSTCHTFDTSADGYGRADGVNAIFIKRLDDALRDGDPIRSVIRSVAVNSNGRTPGITQPSIDGQEAVIRKAYARAKLNPSDTPFVETHGTGTGVGDPIEVEALSRVFKKTERNNPLLLGAVKTNLGHSEAASGLTSIIKATLMLERGQIPATIGLKQLNPKLKIDDWGVQIVTS…
Annulohypoxylon_sp._FPYF3050.1_FPYF3050.1_GCA_040938065.1	g9000	KS-AT-DH-ER-KR-xCP	MVKVQFRQEPIAVVGFACRLPGGNHSPQKLWDFLERGEVASNKVPKSRFNIDGHYDGSHKPGTMRPPGGMFMGDIDLANFDASFFEIGGTEAIAMDPNQRQMLEVVVEGLENAGMPLEKLDGEPVACFVGSYASDYGDMQNRDAEDRPANCAIGVGRSIMANRLSYYLNIKGPSITIDTACSGSLVGLDLACRSIQSGEVDAAIIAASNFYLNPDHVMDAGTVGQAHSPSGLCHTFDVGADGYVKAEAVSCLIVKRLSAAIRDHDPIRAIVKGTASNSNGRTGGIASPSSEAQADAIRAAYANAGITNFNETAYLECHGTGTQAGDPTEIKGIGSVFAPTRSIDNPLLIGSIKSNIGHSEPAAGNSGLIKVILSMEQGVVPGTPLFINPNPKIDFEGFK…
Annulohypoxylon_sp._FPYF3050.1_FPYF3050.1_GCA_040938065.1	g2268	KS-AT-DH-KR-xCP	MVYKRPSSEPVAIVGSSCRFAGGATSLAKLWQVLCEAPDLSKEVPPERFNATAFYHPDGEYHGTTNSIKAYWLQQDHRVFDASMFNITPKEAEAIDPQQRMILEVVYEAMESAGYTLDKYYGKNVAVFSGVMTGDHDTLSQRDELSTSQYYATGNARSIISNRISYFFNFRGPSMTIDTACSSSLVALHQAVLSLRSGESTMACVTGVNLMLTPEQFLVESSLHMLSPTGKSQMWDESADGYARGEGVAALLLKPLSRALSDGDQIMAIVRDTGVNSDGRTKGITLPNPEAQSSLIKDTYRRTGLDSIIPEDQCQYFEAHGTGTPAGDPREAEAISKAFFDPCTADTGNILVGSCKTVLGHTEGAAGLAGLLKVIQAMKHEKVPPNLHFSSINPNVKPF…
Annulohypoxylon_sp._FPYF3050.1_FPYF3050.1_GCA_040938065.1	g5602	KS-AT-DH-KR-xCP-C-A-xCP-Red	MKTVKEIAIIGSGCRLPGGATSPSKLWELLQEPRDLSKKIPRSRFNPDGFYHENGTRHGSTNVMNAYLLEEDHRNFDAQFFQTKPVEADAMDPQQRILLETVYEAIESAGLRFHDMQGSDTAVYVGVMGGDYNDLALKELNTMPTYLSVGTARSILSNRISYFFDWHGPSLTIDTACSSSLVALHEAVQQLQNGTSRVAVAAGANLILGPETFIAESNLSMLSPTGRSRMWDESADGYARGDGFVAVVLKRLEDALNDGDSVESVIRATGVNQDGRTMGITSPSSTSQISLIQQVYRTAGLNPRNEVDRCQYFEAHGTGTPAGDPIEAAAVAGAFFGTEEPDGSDIPPMFVGTIKTVIGHTEGTAGLAGLLKASLAVKHGFIPPNLHFRQLSPAIQKYY…
Annulohypoxylon_sp._FPYF3050.1_FPYF3050.1_GCA_040938065.1	g1949	KS-AT-DH-MT-ER-KR-xCP	MSYSEDRDILTALSQDASMPIAIVGISGRFPGDATTPGRLWDLVTAKKSARTEVPENRYNIDAFYHPSADHQGSTSSRSGHFLKDDVSAFDAPFFKITAQEAHAMDPQQRMALELSYEALESAGARIEDISGSAMGCYMACCVRDYAAIRAIDPDDYPRYEANGSMGTAMIANRISWYFDIKGPSISLDTACSSSLVALHLACQSIRTGETKAALVGATNLILMPHTSNHLSTLSFLSPDGKSMAFDHRANGYSRGEGVSVIVVKSLADALRDRDVIRAVIRGTSVTQDGRTPGINLPSSEAQEALIRAAYTNAGLSPAQTGFFEAHGPGTPAGDPLEASAIGAVFGNTRKPNDPLYIGSVKSNIGHLEAGAGIAGLVKSIYALEKGQIPPNIWFEKAN…
Annulohypoxylon_sp._FPYF3050.1_FPYF3050.1_GCA_040938065.1	g3439	KS-AT-DH-MT-ER-KR-xCP	MVTKQEPVPIAIIGMGCRYSAGINSPEALWDVAAGGRDGWTEVPPDRFNEKSFYHPDPDAPGAINHKGGHFMYQTIAAFDASFFGISPVEAEALDPQHRVVLEISWEAIENGGIPLQKFRGSDTGVYVAMFSHDHEQISHKDPLSFTRYHDTGMSQALLANRVSYIFDLHGPSIMLDTACSGSMVAVHSACQSLRSGEAKMALAGGVGMIFSPDQMAQMSMTGLFNEDGKCYTFDARGNGYGRAEGVGMIALKRLDDALYEGDNIRAVIKSSGVNSDGRTNGITVPNSLAQERLALSLFRNLDFTPIEVQYVEAHGTGTKVGDTVEITSIRNVFCEGRDSGNPLFVGALKENIGHAEAASGIAGLIKTVVSMEKGMIPPNIRLETYKPGIEPDEWNMKL…
Annulohypoxylon_sp._FPYF3050.1_FPYF3050.1_GCA_040938065.1	g4218	KS-AT-DH-MT-ER-KR-xCP	MPYNPLNTKEPSQHIGCRWAGGVKDPKGLWELLRDNRDGWREFNKPHFSAKGFYHENPDRPGSVRTRGGFLVDEDARLFDHGFFGITGREVETMDPSQRKLLEVVYEAFESAGETWDSIAGSHTGVYIGNFAFDHMLIQSRDWENPKPYAATGVDTSILANRISYIFNLHGPSLATNTACSSSMYALHMAVGAIRNGECDGAIVAAANWISDPSMQIVLDKLGALSPTSRCHTFDDSADGYARGEGFAALYLKRTDVALMHGLTIRAVIRGTAVNANGRTGGITRPSAIGQEDVIRKAYMNADLPFSDTAFFECHGTGTPAGDPLEVTAVSNVFASSRSDALADRLLIGSIKPSLGHTEGASAIASIMKVVLSLEAGQIPPTYGVKRLNPNIDFEKAKV…
Annulohypoxylon_sp._FPYF3050.1_FPYF3050.1_GCA_040938065.1	g4524	KS-AT-DH-MT-ER-KR-xCP	MLNLTKGVVEECVSIDTPLSDGVPSTARSYVENDHLEQKSESGSTEPIAIIGMSCRLAGDAKDVPSLWNMLLTKRTAWTPSPGRRFNMKAFQDPSGNKSGTTNTGGGHFLKDDVAAFDAAFFGINPLEASAMDPQHRLLLQIAYETFQNAGLSLESVSGSRTGVYVGQWSTDYHEIQTRDIDSAPLYLVTGTGPAISSNRISYTFDLRGPSITVDTGCSSSLVALHQAIQSLRAGESLQCFVGGVNLLLDPQRFTYQSRLKMFSKEGRSFAFDSRANGYGRGEGCTGIMIKPLSAALRDGDHIRAVIRNSALNQDGRTPGINVPSAAAQKDAILTAYRQAMLDIDIDYVEAHGTGTKVGDPIEARAIASALASGRSALSKLPIGSIKGNIGHTEGAAGL…
Annulohypoxylon_sp._FPYF3050.1_FPYF3050.1_GCA_040938065.1	g5302	KS-AT-DH-MT-ER-KR-xCP	MGSTNYSDGGVLRPLAVVGMSFRFPGGSTSDQSFWDMLVSKRCASADVPPDRFNIEAHYNPDTKRLDTLSCRGGHYIDGKADVFDAGFFGIGAVEASSMDPLHRISLEESFRAFENAGLSLQDVAGTKTCVFSGCLSPDYVTICHKDTYSPNQYHATGSAINMLANRVSWWFDLRGPSVTVDTACSSSLIALDLACKSIWAGDATMGLVCGANMMFTPESQLYLNNLGMLSKESRSYSFDHRANGYGRGEGVGVIIVQPLDEAIRDGRTIRAVIRSTCSNQDGKTPGITQPSREAQYRLIMDAYAKAGLTMDHTRYFEGHGTGTPLGDPVEAAAIGQAFRAYRSAQDPLYLGSVKSNIGHLEGGSGVAGVIKAILALEKGVIAPNADFERINPQIDAES…
Annulohypoxylon_sp._FPYF3050.1_FPYF3050.1_GCA_040938065.1	g5496	KS-AT-DH-MT-ER-KR-xCP	MSGSSGHSTSYSSASSSFEEIKDTTTPGSVPIAICGLGIRLSGGIRSADDFWDLLVNGRDARGPVPSSRYNVDGFDGSLSGKERIETKFGYYLEDDLSRFDPSLFSMTQKELERCDPQQRILLEVARECLEDAGETNYRGKPIGCYVGTFGDEWQNLRDKDTQHVGNHLLTGSGDWMLANRVSYEYNLSGPSMVIRTACSASLIALHEACRAIQFGDASSAVVAGTNLILGPSLTTFMTLEGVLSPDGSCKSFDASANGYARAEGITAVYVKKLTDAIRDGNPIRAVIRGTAANSDGKKQGMLMPRAEALEALMRKIYTDAGLNPAETAFVECHGTGTSVGDPIETSAVGEVFGQSGVYIGSVKPNVGHFPFREKRLTVPTKPTPFPAHKAERVSVNSF…
Annulohypoxylon_sp._FPYF3050.1_FPYF3050.1_GCA_040938065.1	g5603	KS-AT-DH-MT-ER-KR-xCP	MASSRDESLVLKTAREVLKQAENLVQYLEKKNLPEPNFTSNSSAHPADNEYDDIRVHLTDAAQDLILLAKGPMQWLRTFMCSVHDLGAWQTALRFKYFSIVPLDKPMSVKDIAAVAKMDEDRLGRIMKFLSSQRCFQEVEEDVYEHTALSAFIARNKDIEAIVAFQTDEMFEGASLTAKSIEKAPYTVDAAHSAFSLRFGISPYQWYAANPERGARFASAMAGLVQMNRDKTEIRDRFPWAKLTNKTVVDVGGGSGHVAIYLATQFPDLDFIVQDVNPGMLSEGPKRPEFELVSNRVSFMQHNFFDPQPITDAGLFFLRQITHNYPDDVCVKILKAFVPAMEKCAPGTALLINDMVLPPANTEPKVEEHHLRQIDMAMMNGYAAKQRTLKEFAHLLKQA…
Annulohypoxylon_sp._FPYF3050.1_FPYF3050.1_GCA_040938065.1	g7644	KS-AT-DH-MT-ER-KR-xCP	MASDSHASIIRPYDEQYQDNGDTIAQDLLAASDDPIAICGFSMMLPQGASSPQKFWDMMMEKRCATTEIPSDRLNINGFQRKSQSGNTVPLRGGHFLRENISAFDADFFSISSTEAAAMDPMQRMMLEVSYAALLNAGITMADISGSRTAVYTGSFGVQDYLLQMARDPENPPTHAIIGTGLSMLANRISWFYDLHGPSVGIDSACSSTTMAIDMACQALHSGSCDTAMIAGCNLAASPEHYIWLSNMDFLSKDSRCYAFDHRANGYARGEGIGVIILKKLSLALRDGNTIRAVIRSTGSNEDGRTPSITFPSRSAQEELIRDTYRKAGLSLAYTRFFEAHGTGTAAGDPVEANAIGSVFRQYRTAESPVYIGAVKSNIGHLEWASGLVAVIKTILVLE…
Annulohypoxylon_sp._FPYF3050.1_FPYF3050.1_GCA_040938065.1	g786	KS-AT-DH-MT-ER-KR-xCP	MSSQRSETLNAIGQDGLPPIAIVGMACKFPGGASNPSKLWDMIARKQSGRCEIPKSRMNVDAFYHPDPDRNGTFNIRAAHFLEEDISAFDAAFFSISPAEATGMDPQQRMMMESAYEAVENAGVPMEDLSGSNTGCYVGCFSRDYNEMLTHDPETSPVYVSTGNGAAILSNRVSYFFDLKGPSLTVDTACSSSLVALHLACQSLRSGESKAAIVGGTNLIFNPDVMIAMSNVHFLGADAKCHTYDASANGYSRGEGIAAIYIKPLEDAIRDNDTIRAVIRGTACNQDGRTAGIMLPSREAQESLIRSAYKSAKCDPAAVGYFEAHGTGTPAGDPLEAGAIGSTLGQHRGPGDENRLYVGSVKTNIGHLEGASGLAGIIKTVLALEKGLIPPNLYFEKGN…
Annulohypoxylon_sp._FPYF3050.1_FPYF3050.1_GCA_040938065.1	g7952	KS-AT-DH-MT-ER-KR-xCP	MTEWPESRINNGSFEASKEGNVRCRGGHFITEDPGAFDAPFFSVTAKEAASMDPMQRWTLEASYHAFENAGIPAEQLRGTRCGVFSASMTDDYKRMIAQDPDNVPRMAVTGTFASILPNRVSWYFDLHGPSIHVDSACSSSLLALDLACQALRTGEASSAVVTGSNLILGPTIYQMLSSLNFLSADSKCYSFDHRANGYARGEGVIALVIKPLWDAVQDGDMIRAVIRSTSSNQDGHTPGLTQPSPQAQEDLIRQVYKKANLPLNVTRYFEAHGTGTPVGDPIEMKAIGRVFRTSRSNEDPLYVGSVKANIGHLEGSSGLAGVLKSVLMLEKGIIPANANFEKINPKIDVDFYHTKVPSENVSWPCEGLRRISVNSFGFGGTNVHVILDDAYNYLRERR…
Annulohypoxylon_sp._FPYF3050.1_FPYF3050.1_GCA_040938065.1	g8497	KS-AT-DH-MT-ER-KR-xCP	MLTPNTTSNGVGVDEHFVPNGLKLNGETMANGSLVNGNGNIKQSPNGIKVNGSSINGESVNGWLKNGHYTNGNHVAGVPVDGDAGGGGMPIAICGMALRLPGGLTTPQELWEFLLAKGDARSRVPQSRYNLSAFYSPTGKPGTVSTEHGYFLDDSVDLGALDTSFFTMPRTEVERADPQQRLLLEVARECFEDAGVTNWRGKTIGCYVGNFGEDWLEMFTKETQQWGMHRVVGTGDFVLSNRISYEMDLRGPSMTIRTGCSAALVGLNEACMAISRGDCEAALIGGVNLILGPNMTTALAEQGVISKDGSCKTFSADANGYARGEAVTAIYIKPLSDALRDGNPVRAVIRATSHNVDGKTPGMSQPSTEAQEALMRRAYKVAGITDFSQTAMVECHGTG…
Annulohypoxylon_sp._FPYF3050.1_FPYF3050.1_GCA_040938065.1	g4869	KS-AT-DH-MT-KR-xCP	MSGPTGRYVEPMAICGMAMRLPGGIKTAEGYWDALYNGKDMRSSVPISRYNIKGFDGSMGKTNVIQQQHAYFLEDDLAAFDAGLFTMTRNELEKADPQQRLLLLVVRECLESAGVTDYRGSLTGFFVGTFSEDWLQTQSKEEQHATGYVLTGHLDPMLANRVAFEYDFRGPSFVIKTACSSSMIALHNAVRSVQNRDCNAAIVSGSNLNMGPITTASMTQEGIMSPEGSCKTFDARADGYGRGEAVNAIYIKPLSDAIRDGNPIRAVIRNTGVNQNGRATGLFATSIVAQEALIRKAYADVGLNPADTAMVECHGTGTPAGDPIEAISVSNVFSEPSGVYIGSVKPNLGHSEASAGISSLMKAVLALEHKTIPPNIKFEVPNPRIPFAEKKIVVPVKPM…
Annulohypoxylon_sp._FPYF3050.1_FPYF3050.1_GCA_040938065.1	g5704	KS-AT-DH-MT-KR-xCP	MSGYADYAEEPIAVIGSGCRFPGGSSTPSKLWDLLKAPRDVGSKIDRFSAEAFYHKDGSHHGTSNVLNSYLIEDDTRHFDAQFFSIPGSEAEGIDPQQRLLMEVVYEALESSGHQIEELSGSSTAVYVGVMCNDYAHITYHDLESLPKYAATGTASSILSNRVSYFFNWTGPSMTIDTACSSSLIATHQAVQSLRKGESNLAVAAGANLIFGPTNFVAESNVQMLSPTGRSRMWDSGADGYARGEGVAAVMLKRLSDAIRDGDTIECIVRETGTNQDGRTTGITMPSSVSQAELIRKTYANAGLSPLTDRCQYFEAHGTGTKAGDPQEAGAIYRAFFGDKEQSDDPNDVLYVGSIKTIIGHTEGTAGVAGLLKASLAVQNGIIPPNMLFENLNPDIKPY…
Annulohypoxylon_sp._FPYF3050.1_FPYF3050.1_GCA_040938065.1	g9520	KS-AT-DH-MT-KR-xCP	MTDTPLEPIAVIGFGCRFPGGADTPSKLWSVLRNPENLSKKPPTDRFNVDAFYHPVGTHHGTTNATQSYWLEDSERSNVAQFDAGFFNIQPAEVDAMDPQQRILMEVVYDGLCASGQPMEKLRGSDTAVYVGLMCDDYQSMLTSDWETFPRYTVTGVERGILANRLSYFFDWHGPSMTVDTACSSSMVALDQAVQVLRSGKSKMAVAAGANLILTPVMHINEASLGMLSPSGRCAMWDTSADGYTRGEGIAAVFVKTLSQALADNDPIQCILRETGVNQDGRTPGLTMPSSSAQAQLIRECYARIGLDPVNNPKDRPQFFQAHGTGTQAGDPQEADAISSAFFPPNSPAVDDGNKMLVGSIKTVIGHTEGTAGVASIIATSLALKNGIVPPNLHFRNLN…
Annulohypoxylon_sp._FPYF3050.1_FPYF3050.1_GCA_040938065.1	g5565	KS-AT-DH-MT-KR-xCP-C-A-xCP-Red	MDPQQKILLEVVYEGIESAGYSIYDLKGSTTGVYVGQMSDDYRDILMRDVESHPQYVGTGTSRSILANRVSYFFDWRGPSMTIDTACSSSLVALHLAVQSLRNGESQMAVAAGVNLILGPEPYMFLSSLRMLSPTGRCSMWDTNADGYARGEGFTAIVIKTLRQAISDNDHIECVIRETGVNQDGNSTGLTMPSASSQAALIRSVYAKCGLDCLKLDDRCQYFEAHGTGTLAGDPKEAEAIQSVFFPSMSKDSATQDTTKINKLHVGSIKTVIGHLEGNAGLVGVLKASLVVQHGMIPPNMHFQTLNPNIEPFYEPLCVPTSLCQWPKLPSGVPRRASVNSFGFGGTNAHAIIESWDGQAAKEETEDTCVYGPFTISAKSEIALYRFIRSLSQVIKISD…
Annulohypoxylon_sp._FPYF3050.1_FPYF3050.1_GCA_040938065.1	g8432	KS-AT-DH-MT-KR-xCP-C-A-xCP-Red	MTTQEPIAIIGSGCRFPGNANTPSALFNVLRNPKDLLSSIPEERFSTRGYYHENGQYHGHTNVQQSYLLSGESTHRCFDAQFFGISPAEANVIDPQMRLLLETVYEALEDAGQTIKGLQGSNTAVYAGLMTSDYEHIMGRDEDAMGTYHVTGTAKSLLSNRISYFFDWHGPSMTIDTACSSSLYAVHHAVQQLRSGASRVAVAAGSNLLLDPIGYIGESKLQMLSPSSRSRMWDASADGYARGEGVAAIILKTLSDAEKDGDKIDCIIRETAVNQDGRTKGITVLGRPSAEAQANLIRDCYNRAGLDISNPADRPQFFEAHGTGTPSGDPIEAEAISSVFFDKNVISTASHEPLLVGSIKTVLGHTEAVAGLAGILKASLALQHAVVPPNLLFNRLNPK…
Annulohypoxylon_sp._FPYF3050.1_FPYF3050.1_GCA_040938065.1	g8287	KS-AT-DH-xCP-MT	MDPQQRILLEVAYQALESSGYFSNQSKPRDIGCYIGAGSADYDNNIGSHPPTAYSATGTLRAFLSGRISHYFGWSGPSLTLDTACSSSAVAIHTACVALRNGECSQALTGGVALLTSPGPYENLSAAHFLSPSGATKPFDASADGYCRGEGIGIILLKRLSDALIDGDEIFGVIASSAINQNDNCVSITVPHSGSQSNLYKRAVELAGVIPQQVAFVEAHGTGTPVGDPIEIESIRGVFSGPGRVFPLFISSVKGNIGHLEAASGVAAIIKALLQIKHPPLECDQMCIPITNRSLPPNVLTACVNNYGASGSNATIILAEPPPKDRRRINAADDQDAAPAKFPIKVTADSVPSMLRYISKLESFCRQRLSSPITDEPAQLLANIAFNLARQQNQELRYM…
Annulohypoxylon_sp._FPYF3050.1_FPYF3050.1_GCA_040938065.1	g612	KS-AT-xCP-MT-Red	MVSIGERQGGPLPGSTILLFGPLALSFDEAAFAQVRKNVVENEDSRWVIDTVAEFPQIWKSLTTTIPSLKTASGLKQLEDLSDAFRTGRPLETPFPLPNKLLIPLVIVSHLTQYATFLHNSTEGEHVDPFTTSKTNRETLGLCTGLLSAFAVSSSGNSEQFKKYAAVAVRLAMLIGTVVDAQDAATEPSKSLSAAWSSAESGEELKRIVKNFPETYVSVNYDENRATVTTKASAISKLVLQLRSAGLIASEVGLYGRFHASINLEKLGLLLEYVNAHSEFQFPNASSGLVVPTRSNRGGDVITHGPLHQHALQSILAEPPQWFQTVSVVRDATLKSKDSCILSFGPERAVPPSLLRGLNPQVVHVADLDSTSSRFEAFSQKDLRTFSDNDVAVVGMSIK…
Annulohypoxylon_sp._FPYF3050.1_FPYF3050.1_GCA_040938065.1	g806	KS-AT-xCP-MT-Red	MLIGAFVDVQDTYDDTYGRAQSYALAWNSDEQGAEMKRTIVRFPEAYISVQYDERRVTLTTREATGSTLLQQLKEVGITATEVRLQGRFHYAQYNHDVESLIQFCDSNLDFQFSGSESLALPTYANNGGEEIKGGKMHELALRAILVEQSKWYQTFAALQASKLNKQDSVVVSFGLDKFVPPSLMHGMGPRLIHFADLDKDAPQMAGVLDPEARSRNTQAVGDNDIAIVGMSIKVAGADDTNEFWEILSKGQSQHQEVPKSRIGFETHWRDLDTERKWYGNFLNDVDGFDHKFFKKSPREAASTDPQQRLMLQAAYQAVEQSGYFNLPSADAHVGCYIGVCSVDYEQNIACHPPNAFTATGNQRGFIAGKVSHYFGWTGPGITVDTACSSSGVAIHMGC…
Annulohypoxylon_sp._FPYF3050.1_FPYF3050.1_GCA_040938065.1	g2019	SAT-KS-AT-DH-xCP-MT	MTKFGASASSHTQEFVVALFGPQVTHWTHDTLSSLQSDLLRNSKLQFLAKSLLELPPLWSLLEQDFASEDFHGADSLKSLHDFATGEKLLDPQTLTNTHLAPLTVVSHVVDFIRSVDNPYTKESLLSFEAAQGFCIGFLSAAALASASDWSDFEQNVSNAIRLAACIGVVVDKEEASHAAQDRATAISVYWKTAADRTYLETCLDNIPQAYISCITDDRSFTVTLPKGDEEAFCARLREAKIPTSLVGLNGSYHHSRHIEAADKLVKLCSKNSNLRLPDAESLRLPLRSTADGSVIKTGDLHEIAIQLILCKRAHWFQTVKSTLGDLTPDKATFVSLSTKSCIPRSISAAKQTHDDEGALEEIAVVGMACRFPQADTLEEFWEIISAGKTALSTMPLDR…
Annulohypoxylon_sp._FPYF3050.1_FPYF3050.1_GCA_040938065.1	g2035	SAT-KS-AT-DH-xCP-MT	MHTTTPKSAENTLLLFGPQLVRLVPSRLVDLRRTVLEDPNLEFLAEIIKDLPSVWTNTIQPSVPRLKSLENAKEKLQQIVTFFDNETEEAPRLAPPYNLLLAPLSVIAQITEYVHHGHQGTAQGFCIGFLSAAAVASARNRTELERLTATAVRLAVAIGGIVDFDEQERSDGQTTLGQSSTWSVRWTSALEREHFEKTLASFPEAYVSCVTDVDRVTITIPESHFVGFSKKLADGGLSAQPIGLCGRYHTTQPERAELVQQVKVLCQQNPDFRFPAVEQLVLPLRSTSDTEVITSGLLHEIALNCILVDVCKWYDTVQATLDVVEGQPVNVIPIGNSSGAIPRSLKSTAAVADEFLGPSSQTSTPPYTTLPNSNLTTGQTTPYSTAPLPVTGTTQPIAV…
Annulohypoxylon_sp._FPYF3050.1_FPYF3050.1_GCA_040938065.1	g3531	SAT-KS-AT-PT-xCP-xCP-Te	MADQMAFLLFGDQSLDTHGFLADFYRRGNPSVLSKEFLRLAGDALRDEIDRLPREERRKIPIFRTLQQLNERYHAQQIKFPGIDSALLCIAQLAHYIEYEPIRRSEKEHGDATSKQNTKLSGLCTGLFAATAIASSPSLSTLLPIAVQTVLMAFRTGSHVASLAERLSPSTDKSESWTYVLPAAQEAEAKSILAEFHKEEGISQAAHAYVSAVSANNIAISGPPATLRSLFSKDLFESRPTAIPVQMLRLDDEAVTTALAGSKPESVVMSCTTGLPFPQTDTKSLLTAVVHEILNEALIFHKTLSGNANEARGFQGSRILVIPYGPTQAASTLANVLRSQTQAEVILRPAPQVSRETTATSIGNHGSSGNCKLAIVGMAGRFPNSASHEALWELLEKGI…
Annulohypoxylon_sp._FPYF3050.1_FPYF3050.1_GCA_040938065.1	g3371	SAT-KS-AT-xCP-MT	MGSPGNESHTQGPVILFFGPEIPSFSNQSLLELKLALRNREWATEALSALLPTWDLISTKIPFLNNIPGKRQLGDLETWLREGPPENPVGDLPNVVLAPLTVFTQLAQFQQYSERENSTERGPHQAPPRLIPLGFCMGLLSAFTIAHCKDAASWNYYAAVAIRLAMIIGAAVDATDVSSHLGAFESMAVSWQDSEQERKLESIVDGSRGCAYISVRSDERRSTVAVSKYYAPKMLEELRKAGISTMSTGLRGQFHSDYHGELRDDILRLCDSKPSWFQFMDEHTCVEADHISQPQNLHRIVIEAILFKECNWYGTVLALVSSHTKNGGRLTSVSFGQGRFIPPSLQSKFDNRFEQLMPQGESPPSQSTANLSASGGDELSSTQNIFYPRDSYNTGKKDV…
Annulohypoxylon_sp._FPYF3050.1_FPYF3050.1_GCA_040938065.1	g3311	SAT-KS-AT-xCP-MT-Red	MTQTFQQNLGTVPTVLLFGSLALSFDATTFHQLRKSITRTKSLTWLLNVLSNLADDCEVVFAAVPTLNQAGIHDQLLDVRDGLTTGRSLRIVGHIPNTVLIPLVVATQLAQYVALLEHCSLTHEQYIAKGDKETLGLCTGLLAGFAVASSHDQTDLEKYGAAAVRLGMLAGLAIDLKNVINPSKSLSVGWSSPETRDAMIQALKDVPEAYISVEYDDNRATITAAASAASRLKSKLRSLGLAASEIGLYGRFHSAENNQILEQVLAHCDKHAEFQLPDASSSAIPTRSGYVDGKCVTQGTLHAHALLAILVDSPTWYKTLDAALADKEDTTTLLSFGFERCVPSSVLRKLGTRLIHLEDSTVKGATFKRDQEEQGCSERPWKDSDIAVVGMACKLPGAN…
Annulohypoxylon_sp._FPYF3050.1_FPYF3050.1_GCA_040938065.1	g5402	SAT-KS-AT-xCP-xCP-Te	MHRVAVFAGLGSETLFSRTTLDTAVQDASLPESQIILRACHAAFRKQIAKAIEQGHLSLESVDLDDFTEPESLIQPPLTYHHNVVIQHTAIYLIQILRFLRHSRGTHDVQGVAGFCAGLLPAAVVATSHNVIEFMQRAQDFFHVTLWLGINSESYRQAVLSQGGCSPDLPWSMVVHNIGSDEIITRLISDDQAPIYVSARNSPGCVTLSGEGHQLAQFIEKLPSQCRTRPTNVLSLYHNRHRLGEIFNQTVKTLERELSSQWEVSVAPAAPLFSTITGEPLSFSVQSETSITLGRLVSLLLEMILLEPVDWVSVQDKILSNVQQRADSEECEILNFGPGYGVSKSTQKLPQTAEIRDVSAAGASTASDSSASGVSMDDIAIVGMAVDLPGASDADELWD…
Annulohypoxylon_sp._FPYF3050_FPYF3050_GCA_040104375.1	g2087	KS-AT-DH-ER-KR-xCP	MAPSATNGSAYGTSNGVHEDSRAPTNGYTNGHTNGHTNGHTNGFTNGSTHANGNSNGTNGHHDQPFGHTNGHRVGQTNGLSNGHVNGGSNGVSNGLNGSVPPSIKDKSQPIAIVGMSCRLPGNVASPAEFWELCARARSGYSEIPKERFNTASFYHPNPGKAGSHNPVGGHFLNTDLTAFDAPFFSLTEKEAISMDPQQRLLLECTFEALENAGIPKHTIIGKEVGVFVGGSFPEYESHLFRDPDTIPMHQATGCAYAMQSNRLSHFFDLRGPSFTTDTACSSSLVALHVACQSLRTGESNMAIVGGCHLNMLPEFWISFSKSRLFSDSGRSFSFDSRGTGFGRGEGCGMVILKPLEQARRDNDQIRAIIVGSGINQDGKTPGITMPSGDAQETLMRQV…
Annulohypoxylon_sp._FPYF3050_FPYF3050_GCA_040104375.1	g3652	KS-AT-DH-ER-KR-xCP	MESGALMPIAIVGMSCRLPGDVSSPGDFWKLLTKGRSAWSKIPRSRFNQEAYNHPNPEKRGTINSQGGYFLSQNLEMFDPGFFDMTRKEAETMDPTQRLLLECSYEALENAGIPKESISGRKVGVFIGGPDNEHRMGNLRDLDDSPMFDPTGSQGAFLAGRISYFFNLCGPTFTVDTACSSSMHALHMAVQSIRSGESEQAIVAASHLITQPDVWVSMAKLRLFADSGKTYAFDHRAKSGYARGEGAGCLILKPLHKALEDGDYIRAVISHTGISHNGRTVGIVAPSAKEQESLVRNVLSQANIDAKDVGFFEAHGTGTRVGDPIEAKAIYKALSRKLDGQKPLNIGSVKSNVGHLENASGIISVMKAALMLEKGFIVPNADFEKENPAIPLSQWNLKI…
Annulohypoxylon_sp._FPYF3050_FPYF3050_GCA_040104375.1	g3720	KS-AT-DH-ER-KR-xCP	MTKANHYRQDPIAIVGFGCRLPGNNTSPQKLWDFLERGDIASRDVPKSRFNIEGHHDGSLKPKTMRQPGGMFLDNVDLADFDAGFFEIGRSEAISMDPNQRQMLEVVFEGLENAGITLEDLNNQPVGCFVGSYASDYADMHSRDPEDRPANNAVGVARALLANRLSHFLNIKGPSVTIDTACSGSSQGLDVACRYLQSREIDAAIIATSNLYMSPEHLIDTGAFGTAHSPMDDAIANRDPIRAIILGTATTSNGRTPGIASPSAASQALAIAAAYSNAGIEDLNQTTYVECHGTGTQAGDPTEVAGIGSVFAATRPADKPLLIGSIKSNIGHSEPAAGISGLLKAVLSMENSFIPGTPTFINPSPKIDFIGNRVKAFRGGIPWPKDAPRRASINSFGVG…
Annulohypoxylon_sp._FPYF3050_FPYF3050_GCA_040104375.1	g4533	KS-AT-DH-ER-KR-xCP	MPELHIDTYDRLPTWSLRSPELPSKGTDDMDPISDMSTSTDSSTSFHFVDDLKNGSQTESRSYPRKFDDDVICVVGMACRLPGDVRSPAELWDFLVKKKTGQCRVPAQRFNIDGFYNNDDSRAGVMSGDGGYFLNEDVRQFDNTFFGINNLEATYLDPHQRKLLEVAYECFESAGLSMEDVSGTNTAVRAIAAGDCDDAIVAGANLIMSPEQHLETMKGGVLSGTSSCHTFDESADGYGRAEGVNAVYLKRLSSALRDGNKILGVIRATAVNSNGRTPGIAQPSADLQEAVIRKAYTHAGLDFPDTDYIECHGTGTSIGDKIEVDALGRCFASRQGLPLMIGSIKSSMGHSEAASGLTSLIKVLLAFEHASIPPTFGVKKLNPKLRLDSFNMKVVTEAE…
Annulohypoxylon_sp._FPYF3050_FPYF3050_GCA_040104375.1	g6423	KS-AT-DH-ER-KR-xCP	MSEYSSIAEPTPVSDGTNDCICVVGLACRLPGGVKSPSGLWELLANKRCTQGQVPPERFNIHGFHCEDNDRAGVMSADGGYFISEDVRSFDNSFFGINNVEATYMDPLQRKLLEVVFECFENAGVPLDQISGSKTGVYTGDFTTDYQIMHMRDPDYLHRYSSIGSNKSILANRISHVFNLQGPSLTLNTACSSSIYCLHTAISALNAGDCTGAIVAAANLITSPEQYLETMRAGVLSQTSTCHTFDESADGYGRAEGVNAIYIKRLSSAIRDGDKIWGVIRATALNANGKTLGISQPDASLQEEVIRKAYAEAGLCFADTDYVECHGTGTAVGDAIEVDALKRCFSPREGHPLMIGSVKTNLGHSEAASGLTSIIKVLLAFDRDKIPPMYGVTKLNPKL…
Annulohypoxylon_sp._FPYF3050_FPYF3050_GCA_040104375.1	g6938	KS-AT-DH-ER-KR-xCP	MNFTETDSAPPRDSHASPTSKGVRQQQELIAVVGIGWKLPGDTADTEKLWQLLLNGKSGHGPVSPSRYNASAFYHPHHENPGTINSTSGYFLNDDPREFENGFFGISNVEAINMDPQQRKLLETVFECFESAGATLEELNGTNVGCYVGTFSLDYPVMQLADTENLNRYTATGITPTLLANRISHVFNLQGPSFTIDTGCSSSLYSLHCACTALDLGECDAAVVAGANLIQIPQQQILANKAGIISNSATCRTFDISADGYGRADGIGALYLKRLDDAIQNGDPIRGVIRGTAINSNGRTPGVMQPSADGQEKVMRQAYARAGLSVNDTDYVEAHGTGTAVGDPIEVDAISRVFSRSIQRPILIGSVKTNLGHSEPTSGITSVIKVILAMENRIIPPTI…
Annulohypoxylon_sp._FPYF3050_FPYF3050_GCA_040104375.1	g7289	KS-AT-DH-ER-KR-xCP	MSDSSTVDAMEPIAVVGLGCRFPGNATSPTALWEMLREGRSAWSEIPKERMNIASYFHPSGNRQGTVPFMSAHFIDEDVRVFDTSFFSIPADEARAIDPQQRILLEVSVEALDSAGIDRDAIRKSDTGVWVGSFVKDYEQIVLRDPDDSPKYGATGNGIAIMSNRISYFLDVNGPSMTIDTGCSASLVCVHNACQSLRNREIDIGLAGGAGLILTPNTMMPMTALNFLSPDGKCYTFDARANGYGRGEGIGIVVLKRLTDAIRDNDSIRCVIRGSSVNQDGRTPGITLPSSEAQLRNIKSVYRRAGLSVDDTAYVECHGTGTQAGDFREVKAISDAFCGDRTSDNPIYVGSIKTNIGHLEGCAGIAGLIKGVLAIEQGIIPKHLNFELPGNPAIKFDDW…
Annulohypoxylon_sp._FPYF3050_FPYF3050_GCA_040104375.1	g8345	KS-AT-DH-ER-KR-xCP	MDSTAFKPIAIVGIGCRLPGSISNPSQLWEFLDQRRSAGGKLPESRFNIDSYHGGKDQPAITEALGGYFIQEDIRDFDNQFFGINNREASVMDPQQRKLLEVVFESFESAGVSLDDASGANIGCYVASFTPDFIAMQTKDVESLSRYSQIGMGTTILANRISHVFNLKGPSCVLDTACSSSLYALQAACSALLADECDSAVVAGVNLVQTPELHVAISQAGVISPSSTCHTFDTSADGYGRADGVNAIFIKRLDDALRDGDPIRSVIRSVAVNSNGRTPGITQPSIDGQEAVIRKAYARAKLNPSDTPFVETHGTGTGVGDPIEVEALSRVFKKTERNNPLLLGAVKTNLGHSEAASGLTSIIKATLMLERGQIPATIGLKQLNPKLKIDDWGVQIVTS…
Annulohypoxylon_sp._FPYF3050_FPYF3050_GCA_040104375.1	g9000	KS-AT-DH-ER-KR-xCP	MVKVQFRQEPIAVVGFACRLPGGNHSPQKLWDFLERGEVASNKVPKSRFNIDGHYDGSHKPGTMRPPGGMFMGDIDLANFDASFFEIGGTEAIAMDPNQRQMLEVVVEGLENAGMPLEKLDGEPVACFVGSYASDYGDMQNRDAEDRPANCAIGVGRSIMANRLSYYLNIKGPSITIDTACSGSLVGLDLACRSIQSGEVDAAIIAASNFYLNPDHVMDAGTVGQAHSPSGLCHTFDVGADGYVKAEAVSCLIVKRLSAAIRDHDPIRAIVKGTASNSNGRTGGIASPSSEAQADAIRAAYANAGITNFNETAYLECHGTGTQAGDPTEIKGIGSVFAPTRSIDNPLLIGSIKSNIGHSEPAAGNSGLIKVILSMEQGVVPGTPLFINPNPKIDFEGFK…
Annulohypoxylon_sp._FPYF3050_FPYF3050_GCA_040104375.1	g2268	KS-AT-DH-KR-xCP	MVYKRPSSEPVAIVGSSCRFAGGATSLAKLWQVLCEAPDLSKEVPPERFNATAFYHPDGEYHGTTNSIKAYWLQQDHRVFDASMFNITPKEAEAIDPQQRMILEVVYEAMESAGYTLDKYYGKNVAVFSGVMTGDHDTLSQRDELSTSQYYATGNARSIISNRISYFFNFRGPSMTIDTACSSSLVALHQAVLSLRSGESTMACVTGVNLMLTPEQFLVESSLHMLSPTGKSQMWDESADGYARGEGVAALLLKPLSRALSDGDQIMAIVRDTGVNSDGRTKGITLPNPEAQSSLIKDTYRRTGLDSIIPEDQCQYFEAHGTGTPAGDPREAEAISKAFFDPCTADTGNILVGSCKTVLGHTEGAAGLAGLLKVIQAMKHEKVPPNLHFSSINPNVKPF…
Annulohypoxylon_sp._FPYF3050_FPYF3050_GCA_040104375.1	g5602	KS-AT-DH-KR-xCP-C-A-xCP-Red	MKTVKEIAIIGSGCRLPGGATSPSKLWELLQEPRDLSKKIPRSRFNPDGFYHENGTRHGSTNVMNAYLLEEDHRNFDAQFFQTKPVEADAMDPQQRILLETVYEAIESAGLRFHDMQGSDTAVYVGVMGGDYNDLALKELNTMPTYLSVGTARSILSNRISYFFDWHGPSLTIDTACSSSLVALHEAVQQLQNGTSRVAVAAGANLILGPETFIAESNLSMLSPTGRSRMWDESADGYARGDGFVAVVLKRLEDALNDGDSVESVIRATGVNQDGRTMGITSPSSTSQISLIQQVYRTAGLNPRNEVDRCQYFEAHGTGTPAGDPIEAAAVAGAFFGTEEPDGSDIPPMFVGTIKTVIGHTEGTAGLAGLLKASLAVKHGFIPPNLHFRQLSPAIQKYY…
Annulohypoxylon_sp._FPYF3050_FPYF3050_GCA_040104375.1	g1949	KS-AT-DH-MT-ER-KR-xCP	MSYSEDRDILTALSQDASMPIAIVGISGRFPGDATTPGRLWDLVTAKKSARTEVPENRYNIDAFYHPSADHQGSTSSRSGHFLKDDVSAFDAPFFKITAQEAHAMDPQQRMALELSYEALESAGARIEDISGSAMGCYMACCVRDYAAIRAIDPDDYPRYEANGSMGTAMIANRISWYFDIKGPSISLDTACSSSLVALHLACQSIRTGETKAALVGATNLILMPHTSNHLSTLSFLSPDGKSMAFDHRANGYSRGEGVSVIVVKSLADALRDRDVIRAVIRGTSVTQDGRTPGINLPSSEAQEALIRAAYTNAGLSPAQTGFFEAHGPGTPAGDPLEASAIGAVFGNTRKPNDPLYIGSVKSNIGHLEAGAGIAGLVKSIYALEKGQIPPNIWFEKAN…
Annulohypoxylon_sp._FPYF3050_FPYF3050_GCA_040104375.1	g3439	KS-AT-DH-MT-ER-KR-xCP	MVTKQEPVPIAIIGMGCRYSAGINSPEALWDVAAGGRDGWTEVPPDRFNEKSFYHPDPDAPGAINHKGGHFMYQTIAAFDASFFGISPVEAEALDPQHRVVLEISWEAIENGGIPLQKFRGSDTGVYVAMFSHDHEQISHKDPLSFTRYHDTGMSQALLANRVSYIFDLHGPSIMLDTACSGSMVAVHSACQSLRSGEAKMALAGGVGMIFSPDQMAQMSMTGLFNEDGKCYTFDARGNGYGRAEGVGMIALKRLDDALYEGDNIRAVIKSSGVNSDGRTNGITVPNSLAQERLALSLFRNLDFTPIEVQYVEAHGTGTKVGDTVEITSIRNVFCEGRDSGNPLFVGALKENIGHAEAASGIAGLIKTVVSMEKGMIPPNIRLETYKPGIEPDEWNMKL…
Annulohypoxylon_sp._FPYF3050_FPYF3050_GCA_040104375.1	g4218	KS-AT-DH-MT-ER-KR-xCP	MPYNPLNTKEPSQHIGCRWAGGVKDPKGLWELLRDNRDGWREFNKPHFSAKGFYHENPDRPGSVRTRGGFLVDEDARLFDHGFFGITGREVETMDPSQRKLLEVVYEAFESAGETWDSIAGSHTGVYIGNFAFDHMLIQSRDWENPKPYAATGVDTSILANRISYIFNLHGPSLATNTACSSSMYALHMAVGAIRNGECDGAIVAAANWISDPSMQIVLDKLGALSPTSRCHTFDDSADGYARGEGFAALYLKRTDVALMHGLTIRAVIRGTAVNANGRTGGITRPSAIGQEDVIRKAYMNADLPFSDTAFFECHGTGTPAGDPLEVTAVSNVFASSRSDALADRLLIGSIKPSLGHTEGASAIASIMKVVLSLEAGQIPPTYGVKRLNPNIDFEKAKV…
Annulohypoxylon_sp._FPYF3050_FPYF3050_GCA_040104375.1	g4524	KS-AT-DH-MT-ER-KR-xCP	MLNLTKGVVEECVSIDTPLSDGVPSTARSYVENDHLEQKSESGSTEPIAIIGMSCRLAGDAKDVPSLWNMLLTKRTAWTPSPGRRFNMKAFQDPSGNKSGTTNTGGGHFLKDDVAAFDAAFFGINPLEASAMDPQHRLLLQIAYETFQNAGLSLESVSGSRTGVYVGQWSTDYHEIQTRDIDSAPLYLVTGTGPAISSNRISYTFDLRGPSITVDTGCSSSLVALHQAIQSLRAGESLQCFVGGVNLLLDPQRFTYQSRLKMFSKEGRSFAFDSRANGYGRGEGCTGIMIKPLSAALRDGDHIRAVIRNSALNQDGRTPGINVPSAAAQKDAILTAYRQAMLDIDIDYVEAHGTGTKVGDPIEARAIASALASGRSALSKLPIGSIKGNIGHTEGAAGL…
Annulohypoxylon_sp._FPYF3050_FPYF3050_GCA_040104375.1	g5302	KS-AT-DH-MT-ER-KR-xCP	MGSTNYSDGGVLRPLAVVGMSFRFPGGSTSDQSFWDMLVSKRCASADVPPDRFNIEAHYNPDTKRLDTLSCRGGHYIDGKADVFDAGFFGIGAVEASSMDPLHRISLEESFRAFENAGLSLQDVAGTKTCVFSGCLSPDYVTICHKDTYSPNQYHATGSAINMLANRVSWWFDLRGPSVTVDTACSSSLIALDLACKSIWAGDATMGLVCGANMMFTPESQLYLNNLGMLSKESRSYSFDHRANGYGRGEGVGVIIVQPLDEAIRDGRTIRAVIRSTCSNQDGKTPGITQPSREAQYRLIMDAYAKAGLTMDHTRYFEGHGTGTPLGDPVEAAAIGQAFRAYRSAQDPLYLGSVKSNIGHLEGGSGVAGVIKAILALEKGVIAPNADFERINPQIDAES…
Annulohypoxylon_sp._FPYF3050_FPYF3050_GCA_040104375.1	g5496	KS-AT-DH-MT-ER-KR-xCP	MSGSSGHSTSYSSASSSFEEIKDTTTPGSVPIAICGLGIRLSGGIRSADDFWDLLVNGRDARGPVPSSRYNVDGFDGSLSGKERIETKFGYYLEDDLSRFDPSLFSMTQKELERCDPQQRILLEVARECLEDAGETNYRGKPIGCYVGTFGDEWQNLRDKDTQHVGNHLLTGSGDWMLANRVSYEYNLSGPSMVIRTACSASLIALHEACRAIQFGDASSAVVAGTNLILGPSLTTFMTLEGVLSPDGSCKSFDASANGYARAEGITAVYVKKLTDAIRDGNPIRAVIRGTAANSDGKKQGMLMPRAEALEALMRKIYTDAGLNPAETAFVECHGTGTSVGDPIETSAVGEVFGQSGVYIGSVKPNVGHFPFREKRLTVPTKPTPFPAHKAERVSVNSF…
Annulohypoxylon_sp._FPYF3050_FPYF3050_GCA_040104375.1	g5603	KS-AT-DH-MT-ER-KR-xCP	MASSRDESLVLKTAREVLKQAENLVQYLEKKNLPEPNFTSNSSAHPADNEYDDIRVHLTDAAQDLILLAKGPMQWLRTFMCSVHDLGAWQTALRFKYFSIVPLDKPMSVKDIAAVAKMDEDRLGRIMKFLSSQRCFQEVEEDVYEHTALSAFIARNKDIEAIVAFQTDEMFEGASLTAKSIEKAPYTVDAAHSAFSLRFGISPYQWYAANPERGARFASAMAGLVQMNRDKTEIRDRFPWAKLTNKTVVDVGGGSGHVAIYLATQFPDLDFIVQDVNPGMLSEGPKRPEFELVSNRVSFMQHNFFDPQPITDAGLFFLRQITHNYPDDVCVKILKAFVPAMEKCAPGTALLINDMVLPPANTEPKVEEHHLRQIDMAMMNGYAAKQRTLKEFAHLLKQA…
Annulohypoxylon_sp._FPYF3050_FPYF3050_GCA_040104375.1	g7644	KS-AT-DH-MT-ER-KR-xCP	MASDSHASIIRPYDEQYQDNGDTIAQDLLAASDDPIAICGFSMMLPQGASSPQKFWDMMMEKRCATTEIPSDRLNINGFQRKSQSGNTVPLRGGHFLRENISAFDADFFSISSTEAAAMDPMQRMMLEVSYAALLNAGITMADISGSRTAVYTGSFGVQDYLLQMARDPENPPTHAIIGTGLSMLANRISWFYDLHGPSVGIDSACSSTTMAIDMACQALHSGSCDTAMIAGCNLAASPEHYIWLSNMDFLSKDSRCYAFDHRANGYARGEGIGVIILKKLSLALRDGNTIRAVIRSTGSNEDGRTPSITFPSRSAQEELIRDTYRKAGLSLAYTRFFEAHGTGTAAGDPVEANAIGSVFRQYRTAESPVYIGAVKSNIGHLEWASGLVAVIKTILVLE…
Annulohypoxylon_sp._FPYF3050_FPYF3050_GCA_040104375.1	g786	KS-AT-DH-MT-ER-KR-xCP	MSSQRSETLNAIGQDGLPPIAIVGMACKFPGGASNPSKLWDMIARKQSGRCEIPKSRMNVDAFYHPDPDRNGTFNIRAAHFLEEDISAFDAAFFSISPAEATGMDPQQRMMMESAYEAVENAGVPMEDLSGSNTGCYVGCFSRDYNEMLTHDPETSPVYVSTGNGAAILSNRVSYFFDLKGPSLTVDTACSSSLVALHLACQSLRSGESKAAIVGGTNLIFNPDVMIAMSNVHFLGADAKCHTYDASANGYSRGEGIAAIYIKPLEDAIRDNDTIRAVIRGTACNQDGRTAGIMLPSREAQESLIRSAYKSAKCDPAAVGYFEAHGTGTPAGDPLEAGAIGSTLGQHRGPGDENRLYVGSVKTNIGHLEGASGLAGIIKTVLALEKGLIPPNLYFEKGN…
Annulohypoxylon_sp._FPYF3050_FPYF3050_GCA_040104375.1	g7952	KS-AT-DH-MT-ER-KR-xCP	MTEWPESRINNGSFEASKEGNVRCRGGHFITEDPGAFDAPFFSVTAKEAASMDPMQRWTLEASYHAFENAGIPAEQLRGTRCGVFSASMTDDYKRMIAQDPDNVPRMAVTGTFASILPNRVSWYFDLHGPSIHVDSACSSSLLALDLACQALRTGEASSAVVTGSNLILGPTIYQMLSSLNFLSADSKCYSFDHRANGYARGEGVIALVIKPLWDAVQDGDMIRAVIRSTSSNQDGHTPGLTQPSPQAQEDLIRQVYKKANLPLNVTRYFEAHGTGTPVGDPIEMKAIGRVFRTSRSNEDPLYVGSVKANIGHLEGSSGLAGVLKSVLMLEKGIIPANANFEKINPKIDVDFYHTKVPSENVSWPCEGLRRISVNSFGFGGTNVHVILDDAYNYLRERR…
Annulohypoxylon_sp._FPYF3050_FPYF3050_GCA_040104375.1	g8497	KS-AT-DH-MT-ER-KR-xCP	MLTPNTTSNGVGVDEHFVPNGLKLNGETMANGSLVNGNGNIKQSPNGIKVNGSSINGESVNGWLKNGHYTNGNHVAGVPVDGDAGGGGMPIAICGMALRLPGGLTTPQELWEFLLAKGDARSRVPQSRYNLSAFYSPTGKPGTVSTEHGYFLDDSVDLGALDTSFFTMPRTEVERADPQQRLLLEVARECFEDAGVTNWRGKTIGCYVGNFGEDWLEMFTKETQQWGMHRVVGTGDFVLSNRISYEMDLRGPSMTIRTGCSAALVGLNEACMAISRGDCEAALIGGVNLILGPNMTTALAEQGVISKDGSCKTFSADANGYARGEAVTAIYIKPLSDALRDGNPVRAVIRATSHNVDGKTPGMSQPSTEAQEALMRRAYKVAGITDFSQTAMVECHGTG…
Annulohypoxylon_sp._FPYF3050_FPYF3050_GCA_040104375.1	g4869	KS-AT-DH-MT-KR-xCP	MSGPTGRYVEPMAICGMAMRLPGGIKTAEGYWDALYNGKDMRSSVPISRYNIKGFDGSMGKTNVIQQQHAYFLEDDLAAFDAGLFTMTRNELEKADPQQRLLLLVVRECLESAGVTDYRGSLTGFFVGTFSEDWLQTQSKEEQHATGYVLTGHLDPMLANRVAFEYDFRGPSFVIKTACSSSMIALHNAVRSVQNRDCNAAIVSGSNLNMGPITTASMTQEGIMSPEGSCKTFDARADGYGRGEAVNAIYIKPLSDAIRDGNPIRAVIRNTGVNQNGRATGLFATSIVAQEALIRKAYADVGLNPADTAMVECHGTGTPAGDPIEAISVSNVFSEPSGVYIGSVKPNLGHSEASAGISSLMKAVLALEHKTIPPNIKFEVPNPRIPFAEKKIVVPVKPM…
Annulohypoxylon_sp._FPYF3050_FPYF3050_GCA_040104375.1	g5704	KS-AT-DH-MT-KR-xCP	MSGYADYAEEPIAVIGSGCRFPGGSSTPSKLWDLLKAPRDVGSKIDRFSAEAFYHKDGSHHGTSNVLNSYLIEDDTRHFDAQFFSIPGSEAEGIDPQQRLLMEVVYEALESSGHQIEELSGSSTAVYVGVMCNDYAHITYHDLESLPKYAATGTASSILSNRVSYFFNWTGPSMTIDTACSSSLIATHQAVQSLRKGESNLAVAAGANLIFGPTNFVAESNVQMLSPTGRSRMWDSGADGYARGEGVAAVMLKRLSDAIRDGDTIECIVRETGTNQDGRTTGITMPSSVSQAELIRKTYANAGLSPLTDRCQYFEAHGTGTKAGDPQEAGAIYRAFFGDKEQSDDPNDVLYVGSIKTIIGHTEGTAGVAGLLKASLAVQNGIIPPNMLFENLNPDIKPY…
Annulohypoxylon_sp._FPYF3050_FPYF3050_GCA_040104375.1	g9520	KS-AT-DH-MT-KR-xCP	MTDTPLEPIAVIGFGCRFPGGADTPSKLWSVLRNPENLSKKPPTDRFNVDAFYHPVGTHHGTTNATQSYWLEDSERSNVAQFDAGFFNIQPAEVDAMDPQQRILMEVVYDGLCASGQPMEKLRGSDTAVYVGLMCDDYQSMLTSDWETFPRYTVTGVERGILANRLSYFFDWHGPSMTVDTACSSSMVALDQAVQVLRSGKSKMAVAAGANLILTPVMHINEASLGMLSPSGRCAMWDTSADGYTRGEGIAAVFVKTLSQALADNDPIQCILRETGVNQDGRTPGLTMPSSSAQAQLIRECYARIGLDPVNNPKDRPQFFQAHGTGTQAGDPQEADAISSAFFPPNSPAVDDGNKMLVGSIKTVIGHTEGTAGVASIIATSLALKNGIVPPNLHFRNLN…
Annulohypoxylon_sp._FPYF3050_FPYF3050_GCA_040104375.1	g5565	KS-AT-DH-MT-KR-xCP-C-A-xCP-Red	MDPQQKILLEVVYEGIESAGYSIYDLKGSTTGVYVGQMSDDYRDILMRDVESHPQYVGTGTSRSILANRVSYFFDWRGPSMTIDTACSSSLVALHLAVQSLRNGESQMAVAAGVNLILGPEPYMFLSSLRMLSPTGRCSMWDTNADGYARGEGFTAIVIKTLRQAISDNDHIECVIRETGVNQDGNSTGLTMPSASSQAALIRSVYAKCGLDCLKLDDRCQYFEAHGTGTLAGDPKEAEAIQSVFFPSMSKDSATQDTTKINKLHVGSIKTVIGHLEGNAGLVGVLKASLVVQHGMIPPNMHFQTLNPNIEPFYEPLCVPTSLCQWPKLPSGVPRRASVNSFGFGGTNAHAIIESWDGQAAKEETEDTCVYGPFTISAKSEIALYRFIRSLSQVIKISD…
Annulohypoxylon_sp._FPYF3050_FPYF3050_GCA_040104375.1	g8432	KS-AT-DH-MT-KR-xCP-C-A-xCP-Red	MTTQEPIAIIGSGCRFPGNANTPSALFNVLRNPKDLLSSIPEERFSTRGYYHENGQYHGHTNVQQSYLLSGESTHRCFDAQFFGISPAEANVIDPQMRLLLETVYEALEDAGQTIKGLQGSNTAVYAGLMTSDYEHIMGRDEDAMGTYHVTGTAKSLLSNRISYFFDWHGPSMTIDTACSSSLYAVHHAVQQLRSGASRVAVAAGSNLLLDPIGYIGESKLQMLSPSSRSRMWDASADGYARGEGVAAIILKTLSDAEKDGDKIDCIIRETAVNQDGRTKGITVLGRPSAEAQANLIRDCYNRAGLDISNPADRPQFFEAHGTGTPSGDPIEAEAISSVFFDKNVISTASHEPLLVGSIKTVLGHTEAVAGLAGILKASLALQHAVVPPNLLFNRLNPK…
Annulohypoxylon_sp._FPYF3050_FPYF3050_GCA_040104375.1	g8287	KS-AT-DH-xCP-MT	MDPQQRILLEVAYQALESSGYFSNQSKPRDIGCYIGAGSADYDNNIGSHPPTAYSATGTLRAFLSGRISHYFGWSGPSLTLDTACSSSAVAIHTACVALRNGECSQALTGGVALLTSPGPYENLSAAHFLSPSGATKPFDASADGYCRGEGIGIILLKRLSDALIDGDEIFGVIASSAINQNDNCVSITVPHSGSQSNLYKRAVELAGVIPQQVAFVEAHGTGTPVGDPIEIESIRGVFSGPGRVFPLFISSVKGNIGHLEAASGVAAIIKALLQIKHPPLECDQMCIPITNRSLPPNVLTACVNNYGASGSNATIILAEPPPKDRRRINAADDQDAAPAKFPIKVTADSVPSMLRYISKLESFCRQRLSSPITDEPAQLLANIAFNLARQQNQELRYM…
Annulohypoxylon_sp._FPYF3050_FPYF3050_GCA_040104375.1	g612	KS-AT-xCP-MT-Red	MVSIGERQGGPLPGSTILLFGPLALSFDEAAFAQVRKNVVENEDSRWVIDTVAEFPQIWKSLTTTIPSLKTASGLKQLEDLSDAFRTGRPLETPFPLPNKLLIPLVIVSHLTQYATFLHNSTEGEHVDPFTTSKTNRETLGLCTGLLSAFAVSSSGNSEQFKKYAAVAVRLAMLIGTVVDAQDAATEPSKSLSAAWSSAESGEELKRIVKNFPETYVSVNYDENRATVTTKASAISKLVLQLRSAGLIASEVGLYGRFHASINLEKLGLLLEYVNAHSEFQFPNASSGLVVPTRSNRGGDVITHGPLHQHALQSILAEPPQWFQTVSVVRDATLKSKDSCILSFGPERAVPPSLLRGLNPQVVHVADLDSTSSRFEAFSQKDLRTFSDNDVAVVGMSIK…
Annulohypoxylon_sp._FPYF3050_FPYF3050_GCA_040104375.1	g806	KS-AT-xCP-MT-Red	MLIGAFVDVQDTYDDTYGRAQSYALAWNSDEQGAEMKRTIVRFPEAYISVQYDERRVTLTTREATGSTLLQQLKEVGITATEVRLQGRFHYAQYNHDVESLIQFCDSNLDFQFSGSESLALPTYANNGGEEIKGGKMHELALRAILVEQSKWYQTFAALQASKLNKQDSVVVSFGLDKFVPPSLMHGMGPRLIHFADLDKDAPQMAGVLDPEARSRNTQAVGDNDIAIVGMSIKVAGADDTNEFWEILSKGQSQHQEVPKSRIGFETHWRDLDTERKWYGNFLNDVDGFDHKFFKKSPREAASTDPQQRLMLQAAYQAVEQSGYFNLPSADAHVGCYIGVCSVDYEQNIACHPPNAFTATGNQRGFIAGKVSHYFGWTGPGITVDTACSSSGVAIHMGC…
Annulohypoxylon_sp._FPYF3050_FPYF3050_GCA_040104375.1	g2019	SAT-KS-AT-DH-xCP-MT	MTKFGASASSHTQEFVVALFGPQVTHWTHDTLSSLQSDLLRNSKLQFLAKSLLELPPLWSLLEQDFASEDFHGADSLKSLHDFATGEKLLDPQTLTNTHLAPLTVVSHVVDFIRSVDNPYTKESLLSFEAAQGFCIGFLSAAALASASDWSDFEQNVSNAIRLAACIGVVVDKEEASHAAQDRATAISVYWKTAADRTYLETCLDNIPQAYISCITDDRSFTVTLPKGDEEAFCARLREAKIPTSLVGLNGSYHHSRHIEAADKLVKLCSKNSNLRLPDAESLRLPLRSTADGSVIKTGDLHEIAIQLILCKRAHWFQTVKSTLGDLTPDKATFVSLSTKSCIPRSISAAKQTHDDEGALEEIAVVGMACRFPQADTLEEFWEIISAGKTALSTMPLDR…
Annulohypoxylon_sp._FPYF3050_FPYF3050_GCA_040104375.1	g2035	SAT-KS-AT-DH-xCP-MT	MHTTTPKSAENTLLLFGPQLVRLVPSRLVDLRRTVLEDPNLEFLAEIIKDLPSVWTNTIQPSVPRLKSLENAKEKLQQIVTFFDNETEEAPRLAPPYNLLLAPLSVIAQITEYVHHGHQGTAQGFCIGFLSAAAVASARNRTELERLTATAVRLAVAIGGIVDFDEQERSDGQTTLGQSSTWSVRWTSALEREHFEKTLASFPEAYVSCVTDVDRVTITIPESHFVGFSKKLADGGLSAQPIGLCGRYHTTQPERAELVQQVKVLCQQNPDFRFPAVEQLVLPLRSTSDTEVITSGLLHEIALNCILVDVCKWYDTVQATLDVVEGQPVNVIPIGNSSGAIPRSLKSTAAVADEFLGPSSQTSTPPYTTLPNSNLTTGQTTPYSTAPLPVTGTTQPIAV…
Annulohypoxylon_sp._FPYF3050_FPYF3050_GCA_040104375.1	g3531	SAT-KS-AT-PT-xCP-xCP-Te	MADQMAFLLFGDQSLDTHGFLADFYRRGNPSVLSKEFLRLAGDALRDEIDRLPREERRKIPIFRTLQQLNERYHAQQIKFPGIDSALLCIAQLAHYIEYEPIRRSEKEHGDATSKQNTKLSGLCTGLFAATAIASSPSLSTLLPIAVQTVLMAFRTGSHVASLAERLSPSTDKSESWTYVLPAAQEAEAKSILAEFHKEEGISQAAHAYVSAVSANNIAISGPPATLRSLFSKDLFESRPTAIPVQMLRLDDEAVTTALAGSKPESVVMSCTTGLPFPQTDTKSLLTAVVHEILNEALIFHKTLSGNANEARGFQGSRILVIPYGPTQAASTLANVLRSQTQAEVILRPAPQVSRETTATSIGNHGSSGNCKLAIVGMAGRFPNSASHEALWELLEKGI…
Annulohypoxylon_sp._FPYF3050_FPYF3050_GCA_040104375.1	g3371	SAT-KS-AT-xCP-MT	MGSPGNESHTQGPVILFFGPEIPSFSNQSLLELKLALRNREWATEALSALLPTWDLISTKIPFLNNIPGKRQLGDLETWLREGPPENPVGDLPNVVLAPLTVFTQLAQFQQYSERENSTERGPHQAPPRLIPLGFCMGLLSAFTIAHCKDAASWNYYAAVAIRLAMIIGAAVDATDVSSHLGAFESMAVSWQDSEQERKLESIVDGSRGCAYISVRSDERRSTVAVSKYYAPKMLEELRKAGISTMSTGLRGQFHSDYHGELRDDILRLCDSKPSWFQFMDEHTCVEADHISQPQNLHRIVIEAILFKECNWYGTVLALVSSHTKNGGRLTSVSFGQGRFIPPSLQSKFDNRFEQLMPQGESPPSQSTANLSASGGDELSSTQNIFYPRDSYNTGKKDV…
Annulohypoxylon_sp._FPYF3050_FPYF3050_GCA_040104375.1	g3311	SAT-KS-AT-xCP-MT-Red	MTQTFQQNLGTVPTVLLFGSLALSFDATTFHQLRKSITRTKSLTWLLNVLSNLADDCEVVFAAVPTLNQAGIHDQLLDVRDGLTTGRSLRIVGHIPNTVLIPLVVATQLAQYVALLEHCSLTHEQYIAKGDKETLGLCTGLLAGFAVASSHDQTDLEKYGAAAVRLGMLAGLAIDLKNVINPSKSLSVGWSSPETRDAMIQALKDVPEAYISVEYDDNRATITAAASAASRLKSKLRSLGLAASEIGLYGRFHSAENNQILEQVLAHCDKHAEFQLPDASSSAIPTRSGYVDGKCVTQGTLHAHALLAILVDSPTWYKTLDAALADKEDTTTLLSFGFERCVPSSVLRKLGTRLIHLEDSTVKGATFKRDQEEQGCSERPWKDSDIAVVGMACKLPGAN…
Annulohypoxylon_sp._FPYF3050_FPYF3050_GCA_040104375.1	g5402	SAT-KS-AT-xCP-xCP-Te	MHRVAVFAGLGSETLFSRTTLDTAVQDASLPESQIILRACHAAFRKQIAKAIEQGHLSLESVDLDDFTEPESLIQPPLTYHHNVVIQHTAIYLIQILRFLRHSRGTHDVQGVAGFCAGLLPAAVVATSHNVIEFMQRAQDFFHVTLWLGINSESYRQAVLSQGGCSPDLPWSMVVHNIGSDEIITRLISDDQAPIYVSARNSPGCVTLSGEGHQLAQFIEKLPSQCRTRPTNVLSLYHNRHRLGEIFNQTVKTLERELSSQWEVSVAPAAPLFSTITGEPLSFSVQSETSITLGRLVSLLLEMILLEPVDWVSVQDKILSNVQQRADSEECEILNFGPGYGVSKSTQKLPQTAEIRDVSAAGASTASDSSASGVSMDDIAIVGMAVDLPGASDADELWD…
Annulohypoxylon_stygium_MG137_GCA_003314315.1	g2953	KS-AT-DH-ER-KR-xCP	MPELHIDTYDRLPTWNLRSPELPSKGTDDMDPISDMSTSTDSSTSFQFVDDLKNGSQTESRSYPSKPDDDVICVVGMACRLPGDVHSPAELWDFLMKNKTGQCRVPAQRFNIDGFYNKDDSRAGVMSADGGYFLNEDVRQFDNTFFGINNLEATYLDPHQRKLLEVAYECFESTGLSMEDVSGTNTGVYVSNFTVDYTNMHFRDPDYLHRYSSTGSNMAIIANRISHVFNLHGPSLSLNTACSSSLYCLHTAVRAIAAGDCDDAIVAGANLIMSPEQHLETMKGGVLSGTSSCHTFDESADGYGRAEGVNAVYLKRLSSALRDGNKIWGVIRATAVNSNGRTPGIAQPSADLQEAVIRKAYTHAGLDFPDTDYIECHGTGTSIGDKIEIDALGRCFASR…
Annulohypoxylon_stygium_MG137_GCA_003314315.1	g3548	KS-AT-DH-ER-KR-xCP	MSEYSSSAEPTPVSDGTDDCICVVGLACRLPGGVKSPSGLWELLANKRCTQGQVPPERFNIHGFHCEDNNRAGVMSADGGYFISEDVRSFDNSFFGINNVEATYMDPLQRKLLEVVFECFENAGVPLDQISGSKTGVYTGDFTTDYQIMHMRDPDYLHRYSSIGSNKSILANRISHVFNLQGPSLTLNTACSSSIYCLHTAISALNAGDCTGAIVAAANLITSPEQYLETMRAGVLSQTSTCHTFDESADGYGRAEGVNAIYIKRLSSALRDGDKIWGVIRATALNANGKTLGISQPDASLQEEVIRKAYAEAGLRFADTDYVECHGTGTAVGDAIEVDALKRCFSPREGHPLMIGSVKTNLGHSEAASGLTSIIKVLLAFDRDEIPPMYGVTKLNPKL…
Annulohypoxylon_stygium_MG137_GCA_003314315.1	g4672	KS-AT-DH-ER-KR-xCP	MSDSSTVDAMEPIAVVGLGCRFPGNATSPTALWEMLREGQSAWSEIPKERMNIASYFHPSGNRQGTVPFMSAHFIDEDVRVFDTSFFSIPADEARAIDPQQRILLEVSVEALDSAGIDRDAIRKSDTGVWVGSFVKDYEQIVLRDPDDSPKYGATGNGIAIMSNRISYFLDVNGPSMTIDTGCSASLVCVHNACQSLRNREIDIGLAGGAGLILTPNTMMPMTALNFLSPDGKCYTFDARANGYGRGEGIGIVVLKRLTDAIRDNDSIRCVIRGSSVNQDGITLPSSEAQLRNIKSVYRRAGLSVDETAYVECHGTGTQAGDFREVKAISDAFCGDRTSDNPIYVGSIKTNIGHLEGCAGIAGLIKGVLAIEQGIIPKHLNFELPGNPAIKFDDWKVKV…
Annulohypoxylon_stygium_MG137_GCA_003314315.1	g4909	KS-AT-DH-ER-KR-xCP	MESEALMPIAIVGMSCRLPGDVSSPGDFWKLLTKGRSAWSKIPKSRFNQEAYNHPNPEKRGTINSQGGYFLSQNLEMFDPGFFDMTRKEAETMDPTQRLLLECSYEALENAGIPKESISGRKVGVFIGGPDNEHRMGNLRDLDDSPMFDPTGSQGAFLAGRISYFLNLCGPTFTVDTACSSSMHALHMAVQSIRSGESEQAIVAASHLITQPDVWVSMAKLRLFADSGKTYAFDHRAKSGYARGEGAGCLILKPLHKALEDGDYIRAVISHTGISHNGRTVGIVAPSAEEQESLVRNVLSQANIDAKDVGFFEAHGTGTRVGDPIEAKAIYKALSRKLDGHKPLNIGSVKSNVGHLENASGIISVMKAALMLEKGFIVPNADFEKENPAIPLSQWNLKI…
Annulohypoxylon_stygium_MG137_GCA_003314315.1	g5471	KS-AT-DH-ER-KR-xCP	MDSTTFKPIAIVGIGCRLPGSISNPSQLWEFLDQRRSAGGKLPESRFNIDSYHGGKDQPAITEALGGYFIQEDIRDFDNQFFGINNREASVMDPQQRKLLEVVFESFESAGVSLDDASGANIGCYVASFTPDFIAMQTKDVESLSRYSQIGMGTTILANRISHVFNLKGPSCVLDTACSSSLYALQAACSALLADECDSAVVAGVNLVQTPELHVAISQAGVISPSSTCHTFDTSADGYGRADGVNAIFIKRLDDALRDGDPIRSVIRSVAVNSNGRTPGITQPSIDGQEAVIRKAYARAKLNPSDTPFVETHGTGTGVGDPIEVEALSRVFKKAERNNPLLLGAVKTNLGHSEAASGLTSIIKATLMLERGQIPATIGLKQLNPKLKIDDWGVQIVTS…
Annulohypoxylon_stygium_MG137_GCA_003314315.1	g6772	KS-AT-DH-ER-KR-xCP	MRPPGGMFMGDIDLANFDASFFEIGGTEAIAMDPNQRQMLEVVVEGLENAGIPLEKLDGKPVACFVGSYASDYGDMQNRDAEDRPANCAIGVGRSIMANRLSYYLNIKGPSITIDTACSGSLVGLDLACRSIQSGEVDAAIIAASNFYLNPDHVMDVGTVGQAHSPSGLCHTFDVDADGYVKAEAVSCLIVKRLSAAIRDRDPIRAIVKGTASNSNGRTGGIASPSSEAQADAIRAAYANAGITNFNETAYLECHGTGTQAGDPTEIKGIGSVFAPTRSIENPLLIGSIKSNIGHSEPAAGNSGLIKVILSMEQGVIPGTPLFINPNPKIDFEGFKVKASRTAIPWPDPGFSLRRASINSFGYGGSNAHAILELPDPDARRFYVSSYRSEDGEDNFEDT…
Annulohypoxylon_stygium_MG137_GCA_003314315.1	g7216	KS-AT-DH-ER-KR-xCP	MAPSATNGSAYGTSNGVHEDSRAPTNGYTNGHTNGHTNGHTNGFTNGSTQPNGNSNGTNGHHPQPFGHTNGHRVGQTNGLSNGHVNGGSNGVSNGLNGSSPPSMKDKSQPIAIVGMSCRLPGNVASPAEFWELCARARSGYSEIPKERFNTASFYHPNPGKAGSHNPVGGHFLNTDLTAFDAPFFSLTEKEAISMDPQQRLLLECTFEALENAGIPKHTIIGKEVGVFVGGSFPEYESHLFRDPDTIPMHQATGCAYAMQSNRLSHFFDLRGPSFTTDTACSSSLVALHVACQSLRTGESNMAIVGGCHLNMLPEFWISFSKSRLFSDSGRSFSFDSRGTGFGRGEGCGMVILKPLEQARRDNDQIRAIIVGSGINQDGKTPGITMPSGDAQETLMRQV…
Annulohypoxylon_stygium_MG137_GCA_003314315.1	g2056	KS-AT-DH-KR-xCP	MVYKRPSSEPVAIVGSSCRFAGGATSLAKLWQVLCEAPDLSKEVPPERFNATAFYHPDGEYHGTTNSIKAYWLQQDHRVFDASMFNITPKEAEAIDPQQRMILEVVYEAMESAGYTLDKYYGKNVAVFSGVMTGDHDTLSQRDELSTSQYYATGNARSIISNRISYFFNFRGPSMTIDTACSSSLVALHQAVLSLRSGESTMACVTGVNLMLTPEQFLVESSLHMLSPTGKSQMWDESADGYARGEGVAALLLKPLSRALADGDQIMAIVRDTGVNSDGRTKGITLPNPEAQSSLIKDTYRRTGLDSIIPEDQCQYFEAHGTGTPAGDPREAEAISKAFFDPYTGGISAADTGNILVGSCKTVLGHTEGAAGLAGLLKVIQAMKHEKVPPNLHFSSINP…
Annulohypoxylon_stygium_MG137_GCA_003314315.1	g1540	KS-AT-DH-MT-ER-KR-xCP	MSSQRSETLNAIGQDGLPPIAIVGMACKFPGGASNPSKLWDMIARKQSGRCEIPKSRMNVDAFYHPDPDRNGTFNIRAAHFLEEDISAFDAAFFSISPAEATGMDPQQRMMMESAYEAVENAGVPMEDLSGSNTGCYVGCFSRDYNEMLTHDPETSPVYVSTGNGAAILSNRVSYFFDLKGPSLTVDTACSSSLVALHLACQSLRSGESKAAIVGGTNLIFNPDVMIAMSNVHFLGADAKCHTYDASANGYSRGEGIAAIYIKPLEDAIRDNDTIRAVIRGTACNQDGRTAGIMLPSREAQESLIRSAYKSAKCDPAAVGYFEAHGTGTPAGDPLEAGAIGSTLGQHRGPGDENRLYVGSVKTNIGHLEGASGLAGIIKTVLALEKGLIPPNLYFEKGN…
Annulohypoxylon_stygium_MG137_GCA_003314315.1	g2126	KS-AT-DH-MT-ER-KR-xCP	MALDSHASVRPYDEQYQDNGDTIAQDLLASNDDPIAICGFSMMLPQGASSPQKFWDMMMEKRCATTEFPSDRLNINGFQRKSQSGNTVPLRGGHFLRENISAFDADFFSISSTEAAVMDPMQRMMLEVSYEALLNAGITMADISGSRTAVYTGSFGVQDYLLQTARDPENPPTHAIIGTGLSMLANRISWFYDLHGPSIGIDSACSSTTIAIDMACQALHSGSCDTAMIAGCNLAASPEHYIWLSNMDFLSKDSRCYAFDHRANGYARGEGIGVIILKKLSLALRDGNTIRAVIRSTGSNEDGRTPSITFPSRSAQEELIRDTCRKAGLSLAYTRFFEAHGTGTAAGDPVEANAIGSVFRQYRTAESPVYIGAVKSNIGHLEWASGLVAVIKTILVLEK…
Annulohypoxylon_stygium_MG137_GCA_003314315.1	g2444	KS-AT-DH-MT-ER-KR-xCP	MGSTNYSDGGVLRPLAVVGMSFRFPSGSTSDQSFWDMLVSKRCASADVPPDRFNIEAHYNPDTKRLYTLSCRGGHYIDGKADAFDAGFFGIGAVEASSMDPLHRISLEESFRAFENAGLSLQDVAGTKTCVFSGCLSPDYVTICHKDTYSPNQYHATGSAINMLANRVSWWFDLRGPSVTVDTACSSSLVALDLACKSIWAGDATMGLVCGANMMLTPESQLYLNNLGMLSKDSRSYSFDHRANGYGRGEGVGVIIVQPLDEAIRDGRTIRAVIRSTCSNQDGKTPGITQPSREAQYRLIIDAYAKAGLTMDHTRYFEGHGTGTPLGDPVEAAAIGQAFRAYRSPRDPLYLGSVKSNIGHLEGGSGVAGVIKTILALENGVIAPNADFERINPQIDAES…
Annulohypoxylon_stygium_MG137_GCA_003314315.1	g3255	KS-AT-DH-MT-ER-KR-xCP	MPYNPLNAKEPSQHIGCRWAGGVKDPKGLWELLRDNRDGWREFNKPHFSAKGFYHANSDRPGSVRTRGGFLVDEDARLFDHGFFGITGREVETMDPSQRKLLEVVYEAFESAGETWDSIAGSHTGVYIGNFAFDHLLIQSRDWENPKPYAATGVDTSILANRISYIFNLHGPSLATNTACSSSMYALHMAVGAIRNGECDGAIVAAANWISDPSMQIVLDKLGALSPTSRCHTFDDSADGYARGEGFAALYLKRTDVALMHGLTIRAVIRGTAVNANGRTGGITRPSAIGQEDVIRKAYMNADLPFSDTAFFECHGTGTPAGDPLEVTAVSNVFASSRSDALADRLLIGSIKPSLGHTEGASAIASIMKVVLSLEAGQIPPTYGVKRLNPNIDFEKAKV…
Annulohypoxylon_stygium_MG137_GCA_003314315.1	g4372	KS-AT-DH-MT-ER-KR-xCP	MTDPPVMTTSTQLCGSECPEPIAIIGMGCRWPGGVRNPSQLWDLLKEKRDGWREFTSDRINVDGFYHPNRQRPGSMATTGGHLLQEDPRLFDHSFFGITAAEATSMDPSQRKLLEVTYEAFDSACVPLEKVSGSRTGVFVGNFNNDHQLMQLRDPNLTLPYAVTGGGPTILSNRINYVFNLQGPSMVVDTACSASMYALHLAVLSLRNGDCDGAIVAGGNLILGPDHQIITSKLGAASPTSRCHTFDARANGYSRAEGFGAIYLKRLSSALDDGNPIRAVVRGTSFNANGKTGGITHPSPEGQEAVIRQAYKAAGNLDPNLTGYFECHGTGTPVGDPIEVAALGNVFASGRQDEPLLIGSIKPNLGHSEAASAMAQLMKGILSLEHNEIPATIGIKAFN…
Annulohypoxylon_stygium_MG137_GCA_003314315.1	g5323	KS-AT-DH-MT-ER-KR-xCP	MLTPNTTSNSAGVDEHFVPNGLKLNGETMAKGSLVNGNGNIKQSSNDIKVNGSSINGEFVGGWLKNGYYTNGNHIAGVPVNGDASGGAMPIAICGMALRLPGGLTTPQELWEFLLAKGDARSRVPQSRYNLSTFYSPTGKPGTVSTEHGYFLDDSVDLGALDTSFFTMPRTEVERADPQQRLLLEVARECFEDAGVTNWRGKTIGCYVGNFGEDWLEMFTKETQQWGMHRVVGTGDFVLSNRISYEMDLRGPSMTIRTGCSAALVGLNEACMAISRGDCEAALIGGVNLILGPNMTTALAEQGVISKDGSCKTFSADANGYARGEAVTAIYIKPLSDALRDGNPVRAVIRATSHNADGKTPGMSQPSTEAQEALMRRAYKVAGITDFSQTAMVECHGTG…
Annulohypoxylon_stygium_MG137_GCA_003314315.1	g5945	KS-AT-DH-MT-ER-KR-xCP	MRKAGIPAEQLRGTRCGVFSASMTDDYKRMIAQDPDNVPRMAVTGTFASILPNRVSWYFDLHGPSIHVDSACSSSLLALDLACQALRTGEASSAVVTGSNLILGPTIYQMLSSLNFLSADSKCYSFDHRANGYARGEGVIALVIKPLWDAVQDGDMIRAVIRSTSSNQDGHTPGLTQPSPQAQEDLIRQVYKKANLPLNVTRYFEAHGTGTPVGDPIEMKAIGRVFRTSRSNEDPLYVGSVKANIGHLEGSSGLAGVLKSVLMLEKGIIPANANFEKINPKIDVDFYHTKVPSENVSWPCEGLRRISVNSFGFGGTNVHVILDDAYNYLRERRLIGNHCTSTTPPRVAIERPKTNGLTNGSAHVNGTTTNGVPKTNGHAHKNGNDHVNGNGHIINGKTN…
Annulohypoxylon_stygium_MG137_GCA_003314315.1	g6200	KS-AT-DH-MT-ER-KR-xCP	MSGSSGHSTSYSSASSSFEEIKDTTTPGSVPIAICGLGIRLSGGIRSADDFWDLLVNGRDARGPVPSSRYNVDGFDGSLSGKERIETKFGYYLEDDLSRFDPSLFSMTQKELERCDPQQRILLEVARECLEDAGETNYRGKPIGCYVGTFGDEWQNLRDKDTQHVGNHLLTGSGDWMLANRVSYEYNLSGPSMVIRTACSASLIALHEACRAIQFGDASSAVVAGTNLILGPSLTTFMTLEGVLSPDGSCKSFDASANGYARAEGITAVYVKKLTDAIRDGNPIRAVIRGTAANSDGKKQGMLMPRAEALEALMRKIYTDAGLNPAETAFVECHGTGTSVGDPIETSAVGEVFGQSGVYIGSVKPNVGHCEGSAGLASLIKAVLALENKMIPPNIKFST…
Annulohypoxylon_stygium_MG137_GCA_003314315.1	g4273	KS-AT-DH-MT-KR-xCP	MSGYADYAEEPIAVIGSGCRFPGGSSTPSKLWDLLKAPRDVGSKIDRFSAEAFYHKDGSHHGTSNVLNSYLIEDDTRHFDAQFFSIPGSEAEGIDPQQRLLMEVVYEALESSGHQIEELSGSSTAVYVGVMCNDYAHITYHDLESLPKYAATGTASSILSNRVSYFFNWTGPSMTIDTACSSSLIATHQAVQSLRKGESNLAVAAGANLIFGPTNFVAESNVQMLSPTGRSRMWDSGADGYARGEGVAAVMLKRLSDAIRDGDTIECIVRETGTNQDGRTTGITMPSSVSQAELIRKTYANAGLSPLTDRCQYFEAHGTGTKAGDPQEAGAIYRAFFGDKEQSDDPNDVLYVGSIKTIIGHTEGTAGVAGLLKASLAVQNGIIPPNMLFENLNPDIKPY…
Annulohypoxylon_stygium_MG137_GCA_003314315.1	g6376	KS-AT-DH-MT-KR-xCP	MTDTPLEPIAVIGFGCRFPGGADTPSKLWSVLRNPENLSKKPPTDRFNVDAFYHPVGTHHGTTNATQSYWLEDSERSNVAQFDAGFFNIQPAEVDAMDPQQRILMEVVYDGLCASGQPMEKLRGSDTAVYVGLMCDDYQSMLTSDWETFPRYTVTGVERGILANRLSYFFDWHGPSMTVDTACSSSMVALDQAVQVLRSGKSKMAVAAGANLILTPVMHINEASLGMLSPSGRCAMWDTSADGYTRGEGIAAVFVKTLSQALADNDPIQCILRETGVNQDGRTPGLTMPSSSAQAQLIRECYARIGLDPINNPKDRPQFFQAHGTGTQAGDPQEADAISSAFFPSNSPAVDDGSKMLVGSIKTIIGHTEGTAGVASIIATSLALKNGIVPPNLHFRNLN…
Annulohypoxylon_stygium_MG137_GCA_003314315.1	g5388	KS-AT-DH-MT-KR-xCP-C-A-xCP-Red	MTTQEPIAIIGSGCRFPGNADTPSALFDVLRDPQDLLSSIPEERFSTRGYYHENGQYHGHTNVRQSYLLSGESTHRCFDAQFFGISPAEANVIDPQMRLLLETVYEALEDAGQTIKGLQGSNTAVYAGLMTSDYEHIMGRDEDAMGTYHVTGTAKSLLSNRISYFFDWHGPSMTIDTACSSSLYAVHHAVQQLRSGASRVAVAAGSNLLLDPIGYIGESKLQMLSPSSRSRMWDASADGYARGEGVAAIILKTLSDAEKDGDKIDCIIRETAVNQDGRTKGITVLGRPSAEAQANLIRDCYNRAGLDISNPAGRPQFFEAHGTGTPSGDPIEAEAISSVFFDKNVISTASYEPLLVGSTKTVNVNMRDLAYTLNSRRTRFPFVAIFSAFTPGQLMSKIE…
Annulohypoxylon_stygium_MG137_GCA_003314315.1	g1159	KS-AT-DH-MT-KR-xCP-Red	MMSSTPRLPLYEPIAIVGSACHFAGGVNSPSKLWELLRNPRDVRSEISESRFNAKRFYHPNHAHHGHSNVMHSYLIEDDIRAFDAEFFGIKPIEAAVIDPQQRVLMETVYESIEAAGMKIENLKHSDTGVFIGAMCADYEAMQFRDLDSVPTYLATGSARSILSNRISYFFDWHGPSMTIDTACSSSLVAVHLAVKALRSGESKLAIIGGSNLILGPESYIMESKLKMLSPDGVGRMWDKDANGYARGDGVAAIVLKPLSSAISDGDHVECVIRETGVNQDGATTGITMPSVVAQQALIEGTYAKAGLDLRDLNDQPQLFEAHGTGTPAGDPIEAEAISSAFIGHGKPVRSEDDPLFVGSFKTILGHTEGTAGIAAILKASLEIQHSEITPNLHFETLS…
Annulohypoxylon_stygium_MG137_GCA_003314315.1	g805	KS-AT-DH-MT-KR-xCP-Red	MSKPVRQPIAVIGSACHFAGDVSSPSKLWDLLEKPQDVRQDIPKSRFSAEGFYHPSHMQSGHNNVLQSYFLNEDVSSFDAEFFGIKPVEAKAIDPQQRLLLETVYEGLESAGLTIQGIRSSNTGVFVGVMNGDYEAMQFRDLEAIPTYFATGTSRSMLSNRISYFFDCRGPSVTIDTACSSSLVAIHLAVQALRNGESHIAIACGSNLILGPESYVVESKLKMLSPDGVCRMWDRDANGYARGDGVATVILKALDAAIADGDHIECVIRETGINQDGSTPGITMPSSEAQKALIRGTYSRAGLNPLQVDGDRPQYFEAHGTGTSTGDPIEAEAISQAFYPAGNSLKTPSPLYVGSIKTVLGHTEGTAGIAGVLKASLALQHGVIPPNLHFHHLNPRVAP…
Annulohypoxylon_stygium_MG137_GCA_003314315.1	g3632	KS-AT-DH-xCP-MT	MTKFGASASSHTQEFVVALFGPQVTHWTHDTLSSLQSDLLRNPNLQFLTKSLLELPSLWLLLEQDFASEDFQGADSLKSFRDFATGEKLIDPHTLTNTHLAPLTVVSHVVDFIRSVDNPYTKESLLSFEAAQGFCIGFLSAAALASASSWSDFEQNVSNAIRLAACIGVVVDKAEASHAAQDRATAISVYWKTAADRTYLETCLDNIPEAYTSCITDDRSLTVTLPKGEEEAFCARLREAKIPTTLVGLNGCYHHSRHIEAADKLTKLCSGDSNLRLPGAESLRLPLRSTADGSVIKTGALHEISIQLILCKRAHWFQTVKSTLGDLTPGKATFVSLGTKSCVPRSLSAAKQTHDDEGALEEIAVVGMACRFPQADTLEEFWEIISAGKTALSTMPLDR…
Annulohypoxylon_stygium_MG137_GCA_003314315.1	g1716	KS-AT-xCP-MT-Red	MVSIGERQSGPLPGSTILLFGPLALSFDEAAFAQVRKNVVENEDSRWVIDTIAEFPQIWKSLTTTIPSLKTASGLKQLEDLSDAFRTGRPLETPFPLPNKLLIPLVIVSHLTQYATFLRNSTEGEHVDPFTTSKTNRETLGLCTGLLSAFAVSSSGNSEQFKKYAAVAVRLAMLIGTVVDAQDAATEPSKSLSAAWSSVESGEELKRIVKNFSETYVSVNYDENRATVTTKASAISKLVLQLRSAGLIASEVGLYGRFHASINLEKLGLLLEYVNTHSEFQFPNASSGLVVPTRSNRGGDVITHGPLHQHALQSILAEPPQWFQTVSVVRDATLKSKDSCILSFGPERAVPPSLLRGLNPQVVHVADLDSTSSRFEAFSQKDLRTFSDNDVAVVGMSIK…
Annulohypoxylon_stygium_MG137_GCA_003314315.1	g3616	SAT-KS-AT-DH-xCP-MT	MHTTTPKSAENTLLLFGPQLVRLVPSRLVDLRRTVIEDPNLEFLVEIIKDLPSLWSNTIKPNVPSLGSLENAKEKLQQIVTFFENETEEAPRLAPPYNLLLAPLSVIAQIAEYVHHGHQGTAQGFCIGFLSAAAVASARNKTELEGLTATAVRLAVAIGGIVDFDEQQRSDGQTTLEHSSTWSVRWTSALEKEHFEKTLASFPEAYVSCITDVDRVTITIPESHFVGFSKQLADGGLSAQPIGLCGRYHTTQPERAELVQQVKALCQQNPNFQFPAVEQLILPLRSTSDTEVITSGLLHEIALNCILVDVCKWYDTVQATLDVVEGQPVNVIPIGNSSGAIPRSLKSTATVADEFLGPSSQTSTPPYTTLPNSNLTTGQTTPYSTAPPPVTGTTQPIAV…
Annulohypoxylon_stygium_MG137_GCA_003314315.1	g2755	SAT-KS-AT-PT-xCP-xCP-Te	MADQMAFLLFGDQSLDTHGFLADFYRRGNPSVLSKEFLRLAGDALRDEIDRLPREERRKIPIFRTLQQLNERYHAQQIKFPGIDSALLCIAQLAHYIEYEPIRRSEKEHGDVTSKQNTKLSGLCTGLFAATAIASSPSLSTLLPIAVQTVLMAFRTGSHVASLAERLSPSTDKSESWTYVLPAAQEAEAKSILAEFHKEEGISQAAHAYVSAVSANNIAISGPPATLRSLFSKDLFESRPTAIPVQMLRLDDEAVTTALAGSKPESVVMSCTTGLPFPQTDTKSLLTAVVHEILNEALIFHKTLSGNANEARGFQGSRILVIPYGPTQAASTLANVLRSQTQAEVILRPAPQVSRETTATSIGNHGSTGNCKLAIVGMAGRFPDSASHEALWELLEKGI…
Annulohypoxylon_stygium_MG137_GCA_003314315.1	g2846	SAT-KS-AT-xCP-MT	MGSPGNEPHTQGPVILFFGPEIPSFSNQSLLELKLALRNREWATEALSALLPTWDLISIKIPFLSKVPGKRQLGDLETWLREGPPEKPVGDLPNVVLAPLTVFTQLAQFQQYSERENSTERGPHKAPPRLIPLGFCMGLLSAFTIAHCKDAASWNCYAAVAIRLAMIIGAAVDVTDVSSHLGAFESMAVSWQDSEQERKLESIVDESGGCAYVSVRSDERRSTVAVSKYYAPKMLEELRKAGISTVPIGLWGQFHSDYHAELRDEILRLCDSKPSWFQFMDERSCVEANHISQPQNLHRIVIEAILLKECNWYGTVLALVNSHTKNGGRLTSVSFGQGRFIPPSLQSKFDNRFEQLMPPGGSPPSQSTANLSASGGDELPSTNNIFRLHNSHNMENKNV…
Annulohypoxylon_stygium_MG137_GCA_003314315.1	g1559	SAT-KS-AT-xCP-MT-Red	MSDNRDHGTFVVLFGPQVTSFDKQSLDKLREPLLKDTSLHWIKDTVGDLPRLWGVIIESFPDLSGLPGEKLLSDLEKWLRNGVDQRQDMKLSNIILTPLVVIAQLIQYWRYLELNFKGVAGPGTRDLHASFIQQDVETLGFCTGLLSAFTVSCSYNEHGLKQYGAVAIRLAMLIGAFVDVRDTSDDDYGRAKSYALAWNDDEQDTEMRRVIGGFPEAYISVQYDERRVTLTTQEATGPILLQQLKEVGITVTEVGLQGRFHYAQHNHDVESLVQFCDSNLDFQFSGSDGLALPTYANNGGEEIKGGKMHELALRAILVEQSKWYQTFAALQASKLNKQDSVVVSFGLDRFVPPSLMHRLGPRLIHFADIDKDAPETDYGNTQTIGDNDIAIVGMSIKVV…
Annulohypoxylon_stygium_MG137_GCA_003314315.1	g2909	SAT-KS-AT-xCP-MT-Red	MTKTFQQNLGTVPTVLLFGSLALSFDATTFHQLRKSITRTKSLTWLLKVLLNLADDCEVVFAAIPTLNQEGVHDQLLNVRDALTTGRSLRIVGHIPNTILIPLVVATQLAQYVALLEHCSLTHEQYIAKGDKETLGLCTGLLAGFAVAGSHGQTDLEKYGAAAVRLGMLAGLVVDLKNVINPSKSLSVGWSSPETRDAMIRALKDVPEAYISVEYDDNRATITTAASVASQLQSKLRLLGLAASEIGLYGRFHSTENNVILEKVLAHCDKHAEFQLPDASSSAIPTRSGYVDRKCVTQGTLHAHALLAILVESPTWYKTLDAALAEKEDTTILISFGFERCVPSSVLRKLGTRLIHLEDSAVKGATFKREQEEQGCSERPWKDSDIAVVGMACKLPGAN…
Annulohypoxylon_stygium_MG137_GCA_003314315.1	g2540	SAT-KS-AT-xCP-xCP-Te	MYRVAVFAGLGSETLFSRTTLDTAVQDASLPESQIILRACHAAFRKQIAKAIEQGHLSLESVDLDDFTEPESLIQPPLTYHHNVVIQHTAIYLIQILRFLRHSRGTHDVQGVAGFCAGLLPAAVVATSHNVIEFMQRAQDFFHVTLWLGINSESYRQAVLSQGGCSPNLPWSMVVHNISDEIITRLISNDQAPIYVSARNSPGCVTLSGEGHQLAQFIEKLPSQCRTRPTNVLSLYHNRHRLGEIFNQTVKTLERELSSQWEVLVAPAAPLFSTIIGEPLSFSVQSETSITLGRLVSLLLEMILLEPVDWVSIQDNILSDVQQRADSEECEILNFGPGYGVSKSIQKLPQTAEIRDVSAAGASTASDSSASGISMDDIAIVGMAVDLPGASDADELWNN…
Annulohypoxylon_stygium_TJAS01_GCA_040126005.1	g2417	KS-AT-DH-ER-KR-xCP	MDSTTFKPIAIVGIGCRLPGSISNPSQLWEFLDQRRSAGGKLPESRFNIDSYHGGKDQPAITEALGGYFIQEDIRDFDNQFFGINNREASVMDPQQRKLLEVVFESFESAGVSLDDASGANIGCYVASFTPDFIAMQTKDVESLSRYSQIGMGTTILANRISHVFNLKGPSCVLDTACSSSLYALQAACSALLADECDSAVVAGVNLVQTPELHVAISQAGVISPSSTCHTFDTSADGYGRADGVNAIFIKRLDDALRDGDPIRSVIRSVAVNSNGRTPGITQPSIDGQEAVIRKAYARAKLNPSDTPFVETHGTGTGVGDPIEVEALSRVFKKAERNNPLLLGAVKTNLGHSEAASGLTSIIKATLMLERGQIPATIGLKQLNPKLKIDDWGVQIVTS…
Annulohypoxylon_stygium_TJAS01_GCA_040126005.1	g320	KS-AT-DH-ER-KR-xCP	MSEYSSSAEPTPVSDGTDDCICVVGLACRLPGGVKSPSGLWELLANKRCTQGQVPPERFNIHGFHCEDNNRAGVMSADGGYFISEDVRSFDNSFFGINNVEATYMDPLQRKLLEVVFECFENAGVPLDQISGSKTGVYTGDFTTDYQIMHMRDPDYLHRYSSIGSNKSILANRISHVFNLQGPSLTLNTACSSSIYCLHTAISALNAGDCTGAIVAAANLITSPEQYLETMRAGVLSQTSTCHTFDESADGYGRAEGVNAIYIKRLSSALRDGDKIWGVIRATALNANGKTLGISQPDASLQEEVIRKAYAEAGLRFADTDYVECHGTGTAVGDAIEVDALKRCFSPREGHPLMIGSVKTNLGHSEAASGLTSIIKVLLAFDRDEIPPIRMLVLAASFS…
Annulohypoxylon_stygium_TJAS01_GCA_040126005.1	g4414	KS-AT-DH-ER-KR-xCP	MAPSATNGSAYGTSNGVHEDSRAPTNGYTNGHTNGHTNGHTNGFTNGSTQPNGNSNGTNGHHPQPFGHTNGHRVGQTNGLSNGHVNGGSNGVSNGLNGSSPPSMKDKSQPIAIVGMSCRLPGNVASPAEFWELCARARSGYSEIPKERFNTASFYHPNPGKAGSHNPVGGHFLNTDLTAFDAPFFSLTEKEAISMDPQQRLLLECTFEALENAGIPKHTIIGKEVGVLFSDSGRSFSFDSRGTGFGRGEGCGMVILKPLEQARRDNDQIRAIIVGSGINQDGKTPGITMPSGDAQETLMRQVYTNAGLNPSDCGFVEAHGTGTRVGDPIEATAIYNVLGTNRSPRDPLYIGSVKSNIGHLEGASGIVAVIKSALMLERGFILPNYDFKYPNEKIPWKKW…
Annulohypoxylon_stygium_TJAS01_GCA_040126005.1	g5877	KS-AT-DH-ER-KR-xCP	MPELHIDTYDRLPTWNLRSPELPSKGTDDMDPISDMSTSTDSSTSFQFVDDLKNGSQTESRSYPSKPDDDVICVVGMACRLPGDVHSPAELWDFLMKNKTGQCRVPAQRFNIDGFYNKDDSRAGVMSADGGYFLNEDVRQFDNTFFGINNLEATYLDPHQRKLLEVAYECFESTGLSMEDVSGTNTGVYVSNFTVDYTNMHFRDPDYLHRYSSTGSNMAIIANRISHVFNLHGPSLSLNTACSSSLYCLHTAVRAIAAGDCDDAIVAGANLIMSPEQHLETMKGGVLSGTSSCHTFDESADGYGRAEGVNAVYLKRLSSALRDGNKIWGVIRATAVNSNGRTPGIAQPSADLQEAVIRKAYTHAGLDFPDTDYIECHGTGTSIGDKIEIDALGRCFASR…
Annulohypoxylon_stygium_TJAS01_GCA_040126005.1	g6532	KS-AT-DH-ER-KR-xCP	MSDSSTVDAMEPIAVVGLGCRFPGNATSPTALWEMLREGQSAWSEIPKERMNIASYFHPSGNRQGTVPFMSAHFIDEDVRVFDTSFFSIPADEARAIDPQQRILLEVSVEALDSAGIDRDAIRKSDTGVWVGSFVKDYEQIVLRDPDDSPKYGATGNGIAIMSNRISYFLDVNGPSMTIDTGCSASLVCVHNACQSLRNREIDIGLAGGAGLILTPNTMMPMTALNFLSPDGKCYTFDARANGYGRGEGIGIVVLKRLTDAIRDNDSIRCVIRGSSVNQDGITLPSSEAQLRNIKSVYRRAGLSVDETAYVECHGTGTQAGDFREVKAISDAFCGDRTSDNPIYVGSIKTNIGHLEGCAGIAGLIKGVLAIEQGIIPKHLNFELPGNPAIKFDDWKVKV…
Annulohypoxylon_stygium_TJAS01_GCA_040126005.1	g6882	KS-AT-DH-ER-KR-xCP	MNPTETDSAPPRDSHASPTSKGVRQQEELIAVVGIGWKLPGDTADTEKLWQLLLNGKSGHGPVPPSRYNAPAFYHPHHENPGTINSTSGYFLNDDPRKFENGFFGISNVEVINMDPQQRKLLETVFECFESAGATLEELNGTNVGCYVGTFSLDYPVMQLADTENLNRYTATGITPTLLANRIGHVFNLQGPSFTIDTGCSSSLYSLHCACTALDLRECDAAVVAGANLIQIPQQQILASKAGIISNSATCRTFDISADGYGRADGIGALYLKRLDNAIQHGDPIRAVIRGTAINSNGRTPGVMQPSADGQEKVMRRAYARAGLSVDDTDYVEAHGTGTAVGDPIEVDAISRVFSRSIQRPILIGSVKTNLGHSEPTSGITSVIKVILAMEHRIIPPTI…
Annulohypoxylon_stygium_TJAS01_GCA_040126005.1	g8976	KS-AT-DH-ER-KR-xCP	MESEALMPIAIVGMSCRLPGDVSSPGDFWKLLTKGRSAWSKIPKSRFNQEAYNHPNPEKRGTINSQGGYFLSQNLEMFDPGFFDMTRKEAETMDPTQRLLLECSYEALENAGIPKESISGRKVGVFIGGPDNEHRMGNLRDLDDSPMFDPTGSQGAFLAGRISYFLNLCGPTFTVDTACSSSMHALHMAVQSIRSGESEQAIVAASHLITQPDVWVSMAKLRLFADSGKTYAFDHRAKSGYARGEGAGCLILKPLHKALEDGDYIRAVISHTGISHNGRTVGIVAPSAEEQESLVRNVLSQANIDAKDVGFFEAHGTGTRVGDPIEAKAIYKALSRKLDGHKPLNIGSVKSNVGHLENASGIISVMKAALMLEKGFIVPNADFEKENPAIPLSQWNLKI…
Annulohypoxylon_stygium_TJAS01_GCA_040126005.1	g5522	KS-AT-DH-KR-xCP	MVYKRPSSEPVAIVGSSCRFAGGATSLAKLWQVLCEAPDLSKEVPPERFNATAFYHPDGEYHGTTNSIKAYWLQQDHRVFDASMFNITPKEAEAIDPQQRMILEVVYEAMESAGYTLDKYYGKNVAVFSGVMTGDHDTLSQRDELSTSQYYATGNARSIISNRISYFFNFRGPSMTIDTACSSSLVALHQAVLSLRSGESTMACVTGVNLMLTPEQFLVESSLHMLSPTGKSQMWDESADGYARGEGVAALLLKPLSRALADGDQIMAIVRDTGVNSDGRTKGITLPNPEAQSSLIKDTYRRTGLDSIIPEDQCQYFEAHGTGTPAGDPREAEAISKAFFDPYTGGISAADTGNILVGSCKTVLGHTEGAAGLAGLLKVIQAMKHEKVPPNLHFSSINP…
Annulohypoxylon_stygium_TJAS01_GCA_040126005.1	g1573	KS-AT-DH-MT-ER-KR-xCP	MSSQRSETLNAIGQDGLPPIAIVGMACKFPGGASNPSKLWDMIARKQSGRCEIPKSRMNVDAFYHPDPDRNGTFNIRAAHFLEEDISAFDAAFFSISPAEATGMDPQQRMMMESAYEAVENAGVPMEDLSGSNTGCYVGCFSRDYNEMLTHDPETSPVYVSTGNGAAILSNRVSYFFDLKGPSLTVDTACSSSLVALHLACQSLRSGESKAAIVGGTNLIFNPDVMIAMSNVHFLGADAKCHTYDASANGYSRGEGIAAIYIKPLEDAIRDNDTIRAVIRGTACNQDGRTAGIMLPSREAQESLIRSAYKSAKCDPAAVGYFEAHGTGTPAGDPLEAGAIGSTLGQHRGPGDENRLYVGSVKTNIGHLEGASGLAGIIKTVLALEKGLIPPNLYFEKGN…
Annulohypoxylon_stygium_TJAS01_GCA_040126005.1	g2567	KS-AT-DH-MT-ER-KR-xCP	MTTALAEQGVISKDGSCKTFSADANGYARGEAVTAIYIKPLSDALRDGNPVRAVIRATSHNADGKTPGMSQPSTEAQEALMRRAYKVAGITDFSQTAMVECHGTGTPTGDPIETKAVAQVFGESGVYIGSSKPNLGHSEGASGLVAIMKMVLALENRIIPPNIRFTTPNPKIPFKEAKLTVPLEPTPWPASRLERVSINSFGVGGANAHVILDSAAAFNASAITQNAPLIPQLLLYSANTSKSLARAVDNYKEWVGKNPDKVADLAYTLALRREHLQHRTFAIVNNGVVENAAPPTKAALKPNVVMVFTGQGAQWPLMGKELLQSNETFQSTITTLDQHLKAIIGNSLSYSIEEELIKPARKSRLNNAELSQPLCTAVQIALVDTFQAYGITSTAVVGH…
Annulohypoxylon_stygium_TJAS01_GCA_040126005.1	g5576	KS-AT-DH-MT-ER-KR-xCP	MPYNPLNAKEPSQHIGCRWAGGVKDPKGLWELLRDNRDGWREFNKPHFSAKGFYHANSDRPGSVRTRGGFLVDEDARLFDHGFFGITGREVETMDPSQRKLLEVVYEAFESAGETWDSIAGSHTGVYIGNFAFDHLLIQSRDWENPKPYAATGVDTSILANRISYIFNLHGPSLATNTACSSSMYALHMAVGAIRNGECDGAIVAAANWISDPSMQIVLDKLGALSPTSRCHTFDDSADGYARGEGFAALYLKRTDVALMHGLTIRAVIRGTAVNANGRTGGITRPSAIGQEDVIRKAYMNADLPFSDTAFFECHGTGTPAGDPLEVTAVSNVFASSRSDALADRLLIGSIKPSLGHTEGASAIASIMKVVLSLEAGQIPPTYGVKRLNPNIDFEKAKV…
Annulohypoxylon_stygium_TJAS01_GCA_040126005.1	g7329	KS-AT-DH-MT-ER-KR-xCP	MTDPPVMTTSTQLCGSECPEPIAIIGMGCRWPGGVRNPSQLWDLLKEKRDGWREFTSDRINVDGFYHPNRQRPGSMATTGGHLLQEDPRLFDHSFFGITAAEATSMDPSQRKLLEVTYEAFDSACVPLEKVSGSRTGVFVGNFNNDHQLMQLRDPNLTLPYAVTGGGPTILSNRINYVFNLQGPSMVVDTACSASMYALHLAVLSLRNGDCDGAIVAGGNLILGPDHQIITSKLGAASPTSRCHTFDARANGYSRAEGFGAIYLKRLSSALDDGNPIRAVVRGTSFNANGKTGGITHPSPEGQEAVIRQAYKAAGNLDPNLTGYFECHGTGTPVGDPIEVAALGNVFASGRQDEPLLIGSIKPNLGHSEAASAMAQLMKGILSLEHNEIPATIGIKAFN…
Annulohypoxylon_stygium_TJAS01_GCA_040126005.1	g7429	KS-AT-DH-MT-ER-KR-xCP	MSGSSGHSTSYSSASSSFEEIKDTTTPGSVPIAICGLGIRLSGGIRSADDFWDLLVNGRDARGPVPSSRYNVDGFDGSLSGKERIETKFGYYLEDDLSRFDPSLFSMTQKELERCDPQQRILLEVARECLEDAGETNYRGKPIGCYVGTFGDEWQNLRDKDTQHVGNHLLTGSGDWMLANRVSYEYNLSGPSMVIRTACSASLIALHEACRAIQFGDASSAVVAGTNLILGPSLTTFMTLEGVLSPDGSCKSFDASANGYARAEGITAVYVKKLTDAIRDGNPIRAVIRGTAANSDGKKQGMLMPRAEALEALMRKIYTDAGLNPAETAFVECHGTGTSVGDPIETSAVGEVFGQSGVYIGSVKPNVGHCEGSAGLASLIKAVLALENKMIPPNIKFST…
Annulohypoxylon_stygium_TJAS01_GCA_040126005.1	g8300	KS-AT-DH-MT-ER-KR-xCP	MRKAGIPAEQLRGTRCGVFSASMTDDYKRMIAQDPDNVPRMAVTGTFASILPNRVSWYFDLHGPSIHVDSACSSSLLALDLACQALRTGEASSAVVTGSNLILGPTIYQMLSSLNFLSADSKCYSFDHRANGYARGEGVIALVIKPLWDAVQDGDMIRAVIRSTSSNQDGHTPGLTQPSPQAQEDLIRQVYKKANLPLNVTRYFEAHGTGTPVGDPIEMKAIGRVFRTSRSNEDPLYVGSVKANIGHLEGSSGLAGVLKSVLMLEKGIIPANANFEKINPKIDVDFYHTKVPSENVSWPCEGLRRISVNSFGFGGTNVHVILDDAYNYLRERRLIGNHCTSTTPPRVAIERPKTNGLTNGSAHVNGTTTNGVPKTNGHAHKNGNDHVNGNGHIINGKTN…
Annulohypoxylon_stygium_TJAS01_GCA_040126005.1	g3436	KS-AT-DH-MT-KR-xCP	MTDTPLEPIAVIGFGCRFPGGADTPSKLWSVLRNPENLSKKPPTDRFNVDAFYHPVGTHHGTTNATQSYWLEDSERSNVAQFDAGFFNIQPAEVDAMDPQQRILMEVVYDGLCASGQPMEKLRGSDTAVYVGLMCDDYQSMLTSDWETFPRYTVTGVERGILANRLSYFFDWHGPSMTVDTACSSSMVALDQAVQVLRSGKSKMAVAAGANLILTPVMHINEASLGMLSPSGRCAMWDTSADGYTRGEGIAAVFVKTLSQALADNDPIQCILRETGVNQDGRTPGLTMPSSSAQAQLIRECYARIGLDPINNPKDRPQFFQAHGTGTQAGDPQEADAISSAFFPSNSPAVDDGSKMLVGSIKTIIGHTEGTAGVASIIATSLALKNGIVPPNLHFRNLN…
Annulohypoxylon_stygium_TJAS01_GCA_040126005.1	g7229	KS-AT-DH-MT-KR-xCP	MSGYADYAEEPIAVIGSGCRFPGGSSTPSKLWDLLKAPRDVGSKIDRFSAEAFYHKDGSHHGTSNVLNSYLIEDDTRHFDAQFFSIPGSEAEGIDPSNIEELSGSSTAVYVGVMCNDYAHITYHDLESLPKYAATGTASSILSNRVSYFFNWTGPSMTIDTACSSSLIATHQAVQSLRKGESNLAVAAGANLIFGPTNFVAESNVQMLSPTGRSRMWDSGADGYARGEGVAAVMLKRLSDAIRDGDTIECIVRETGTNQDGRTTGITMPSSVSQAELIRKTYANAGLSPLTDRCQYFEAHGTGTKAGDPQEAGAIYRAFFGDKEQSDDPNDVLYVGSIKTIIGHTEGTAGVAGLLKASLAVQNGIIPPNMLFENLNPDIKPYYGKLQILTDAKPWPQLP…
Annulohypoxylon_stygium_TJAS01_GCA_040126005.1	g2499	KS-AT-DH-MT-KR-xCP-C-A-xCP-Red	MRLLLETVYEALEDAGQTIKGLQGSNTAVYAGLMTSDYEHIMGRDEDAMGTYHVTGTAKSLLSNRISYFFDWHGPSMTIDTACSSSLYAVHHAVQQLRSGASRVAVAAGSNLLLDPIGYIGESKLQMLSPSSRSRMWDASADGYARGEGVAAIILKTLSDAEKDGDKIDCIIRETAVNQDGRTKGITVLGRPSAEAQANLIRDCYNRAGLDISNPAGRPQFFEAHGTGTPSGDPIEAEAISSVFFDKNVISTASYEPLLVGSTKTVNVNMRDLAYTLNSRRTRFPFVAIFSAFTPGQLMSKIEEYVEKLRLDATDLLGAQPSDRSKPRILAIFTGQGAQWARMGARLISESISARHVLEKLQDRLARLPSEDRPRWFLIDELQKEANRSRMNEAELSQT…
Annulohypoxylon_stygium_TJAS01_GCA_040126005.1	g1047	KS-AT-DH-MT-KR-xCP-Red	MMSSTPRLPLYEPIAIVGSACHFAGGVNSPSKLWELLRNPRDVRSEISESRFNAKRFYHPNHAHHGHSNVMHSYLIEDDIRAFDAEFFGIKPIEAAVIDPQQRVLMETVYESIEAAGMKIENLKHSDTGVFIGAMCADYEAMQFRDLDSVPTYLATGSARSILSNRISYFFDWHGPSMTIDTACSSSLVAVHLAVKALRSGESKLAIIGGSNLILGPESYIMESKLKMLSPDGVGRMWDKDANGYARGDGVAAIVLKPLSSAISDGDHVECVIRETGVNQDGATTGITMPSVVAQQALIEGTYAKAGLDLRDLNDQPQLFEAHGTGTPAGDPIEAEAISSAFIGHGKPVRSEDDPLFVGSFKTILGHTEGTAGIAAILKASLEIQHSEITPNLHFETLS…
Annulohypoxylon_stygium_TJAS01_GCA_040126005.1	g695	KS-AT-DH-MT-KR-xCP-Red	MSKPVRQPIAVIGSACHFAGDVSSPSKLWDLLEKPQDVRQDIPKSRFSAEGFYHPSHMQSGHNNVLQSYFLNEDVSSFDAEFFGIKPVEAKAIDPQQRLLLETVYEGLESAGLTIQGIRSSNTGVFVGVMNGDYEAMQFRDLEAIPTYFATGTSRSMLSNRISYFFDCRGPSVTIDTACSSSLVAIHLAVQALRNGESHIAIACGSNLILGPESYVVESKLKMLSPDGVCRMWDRDANGYARGDGVATVILKALDAAIADGDHIECVIRETGINQDGSTPGITMPSSEAQKALIRGTYSRAGLKLQYFEAHGTGTSTGDPIEAEAISQAFYPAGNSLKTPSPLYVGSIKTVLGHTEGTAGIAGVLKASLALQHGVIPPNLHFHHLNPRVAPFYHKLEIV…
Annulohypoxylon_stygium_TJAS01_GCA_040126005.1	g4349	KS-AT-DH-xCP-MT	MTKFGASASSHTQEFVVALFGPQVTHWTHDTLSSLQSDLLRNPNLQFLTKSLLELPSLWLLLEQDFASEDFQGADSLKSFRDFATGEKLIDPHTLTNTHLAPLTVVSHVVDFIRSVDNPYTKESLLSFEAAQGFCIGFLSAAALASASSWSDFEQNVSNAIRLAACIGVVVDKAEASHAAQDRATAISVYWKTAADRTYLETCLDNIPEAYTSCITDDRSLTVTLPKGEEEAFCARLREAKIPTTLVGLNGCYHHSRHIEAADKLTKLCSGDSNLRLPGAESLRLPLRSTADGSVIKTGALHEISIQLILCKRAHWFQTVKSTLGDLTPGKATFVSLGTKSCVPRSLSAAKQTHDDEGALEEIAVVGMACRFPQADTLEEFWEIISAGKTALSTMPLDR…
Annulohypoxylon_stygium_TJAS01_GCA_040126005.1	g1753	KS-AT-xCP-MT-Red	MVSIGERQSGPLPGSTILLFGPLALSFDEAAFAQVRKNVVENEDSRWVIDTIAEFPQIWKSLTTTIPSLKTASGLKQLEDLSDAFRTGRPLETPFPLPNKLLIPLVIVSHLTQYATFLRNSTEGEHVDPFTTSKTNRETLGLCTGLLSAFAVSSSGNSEQFKKYAAVAVRLAMLIGTVVDAQDAATEPSKSLSAAWSSVESGEELKRIVKNFSETYVSVNYDENRATVTTKASAISKLVLQLRSAGLIASEVGLYGRFHASINLEKLGLLLEYVNTHSEFQFPNASSGLVVPTRSNRGGDVITHGPLHQHALQSILAEPPQWFQTVSVVRDATLKSKDSCILSFGPERAVPPSLLRGLNPQVVHVADLDSTSSRFEAFSQKDLRTFSDNDVAVVGMSIK…
Annulohypoxylon_stygium_TJAS01_GCA_040126005.1	g4364	SAT-KS-AT-DH-xCP-MT	MHTTTPKSAENTLLLFGPQLVRLVPSRLVDLRRTVIEDPNLEFLVEIIKDLPSLWSNTIKPNVPSLGSLENAKEKLQQIVTFFENETEEAPRLAPPYNLLLAPLSVIAQIAEYVHHGHQGTAQGFCIGFLSAAAVASARNKTELEGLTATAVRLAVAIGGIVDFDEQQRSDGQTTLEHSSTWSVRWTSALEKEHFEKTLASFPEAYVSCITDVDRVTITIPESHFVGFSKQLADGGLSAQPIGLCGRYHTTQPERAELVQQVKALCQQNPNFQFPAVEQLILPLRSTSDTEVITSGLLHEIALNCILVDVCKWYDTVQATLDVVEGQPVNVIPIGNSSGAIPRSLKSTATVADEFLGPSSQTSTPPYTTLPNSNLTTGQTTPYSTAPPPVTGTTQPIAV…
Annulohypoxylon_stygium_TJAS01_GCA_040126005.1	g8864	SAT-KS-AT-PT-xCP-xCP-Te	MADQMAFLLFGDQSLDTHGFLADFYRRGNPSVLSKEFLRLAGDALRDEIDRLPREERRKIPIFRTLQQLNERYHAQQIKFPGIDSALLCIAQLAHYIEYEPIRRSEKEHGDVTSKQNTKLSGLCTGLFAATAIASSPSLSTLLPIAVQTVLMAFRTGSHVASLAERLSPSTDKSESWTYVLPAAQEAEAKSILAEFHKEEGISQAAHAYVSAVSANNIAISGPPATLRSLFSKDLFESRPTAIPVQMLRLDDEAVTTALAGSKPESVVMSCTTGLPFPQTDTKSLLTAVVHEILNEALIFHKTLSGNANEARGFQGSRILVIPYGPTQAASTLANVLRSQTQAEVILRPAPQVSRETTATSIGNHGSTGNCKLAIVGMAGRFPDSASHEALWELLEKGI…
Annulohypoxylon_stygium_TJAS01_GCA_040126005.1	g1591	SAT-KS-AT-xCP-MT-Red	MSDNRDHGTFVVLFGPQVTSFDKQSLDKLREPLLKDTSLHWIKDTVGDLPRLWGVIIESFPDLSGLPGEKLLSDLEKWLRNGVDQRQDMKLSNIILTPLVVIAQLIQYWRYLELNFKGVAGPGTRDLHASFIQQDVETLGFCTGLLSAFTVSCSYNEHGLKQYGAVAIRLAMLIGAFVDVRDTSDDDYGRAKSYALAWNDDEQDTEMRRVIGGFPEAYISVQYDERRVTLTTQEATGPILLQQLKEVGITVTEVGLQGRFHYAQHNHDVESLVQFCDSNLDFQFSGSDGLALPTYANNGGEEIKGGKMHELALRAILVEQSKWYQTFAALQASKLNKQDSVVVSFGLDRFVPPSLMHRLGPRLIHFADIDKDAPETDYGNTQTIGDNDIAIVGMSIKVV…
Annulohypoxylon_stygium_TJAS01_GCA_040126005.1	g7522	SAT-KS-AT-xCP-xCP	MYRVAVFAGLGSETLFSRTTLDTAVQDASLPESQIILRACHAAFRKQIAKAIEQGHLSLESVDLDDFTEPESLIQPPLTYHHNVVIQHTAIYLIQILRFLRHSRGTHDVQGVAGFCAGLLPAAVVATSHNVIEFMQRAQDFFHVTLWLGINSESYRQAVLSQGGCSPNLPWSMVVHNISDEIITRLISNDQAPIYVSARNSPGCVTLSGEGHQLAQFIEKLPSQCRTRPTNVLSLYHNRHRLGEIFNQTVKTLERELSSQWEVLVAPAAPLFSTIIGEPLSFSVQSETSITLGRLVSLLLEMILLEPVDWVSIQDNILSDVQQRADSEECEILNFGPGYGVSKSIQKLPQTAEIRDVSAAGASTASDSSASGISMDDIAIVGMAVDLPGASDADELWNN…
Annulohypoxylon_truncatum_CBS_140777_GCA_022578515.1	g1660	KS-AT-DH-ER-KR-xCP	MAKSQHHQQEPMAIIGFACRLPGGNNSPQKFWDFIERGQVAPNSVPKNRFNFEGHFDGSLKPKTMRQAGGMFLGDVDPADFDAGFFEVGGAEALAMDPNQRQMLEVVFEGLENAGIPLEKLDNQPVGCFVGSYAADYADMQSRDPEDRPPNNALGVGRAILANRLSHFLNIKGPSVTLDTACSGSLQGLDLACRYLQSRDVNAAVVATSNLYMNPEHLIDTGNIGSAHSPTALCHTFDADADGYVKAEAVSAIIVKRLEDAIRDRDPIRAVVLGTATNSNGRTPGIASPSSTAQAAAIRAAYAHAGITDLNLTTYLECHGDPTEVNGIASVFAATRPADNPLIIGSVKSNIGHSEPAAGISGLLKAILSIENGFIPGMPTFIKPSPKIDFVGQKVKAYR…
Annulohypoxylon_truncatum_CBS_140777_GCA_022578515.1	g2368	KS-AT-DH-ER-KR-xCP	MEPIAVVGLGCRFPGSATSPVALWDMLREGQSAWSEIPKERMNIASYFHPSGNRQGTFFSIPADEARAIDPQQRVLLEVSVEALDSAGVDRDALRKSDTGVWVGSFVKDYEQIVLRDPDDSPKYGATGNGIAIMSNRISYFLDVNGPSMTIDTGCSASLVCVHNACQSLRNGEIDMGLAGGAGLILTPNTMMPMTALNFLSPDGKCFTFDARANGYGRGEGIGIVVLKRLTDAIRDNDNIRSVIRGSSVNQDGRTPGITLPSSEAQLRNIKSVYKRAGLPVDGTAYVECHGTGTQAGDFREVKAISDAFCGDRTSNNPIYVGSIKTNIGHLEGCAGIAGLIKGVLTIEQGIIPKHLNFELPGNPAIKFDDWKVKVPVTNTSWPVEGLRRASINCFGFGG…
[truncated: 12,661 more rows]
