# Supplementary material for: Black yeasts are efficient heterologous hosts of a wide range of fungal polyketides
Source: Research Square preprint supplement (doi:10.21203/rs.3.rs-6001933/v1), 2025-02-20
Supplement: Supplementary file 2 [file d31b2502f8288249ff0dc77c.docx]

**Black yeasts are efficient heterologous hosts of a wide range of fungal polyketides**

**Supplementary material**

Adrian E. Gadar-Lopez1, Ana Calheiros de Carvalho1, Xiaowei Li1, Daniela Rago1, Linda Ahonen1, Charlotte H. Gotfredsen2, Marie V. Lukassen3, Carolina Cano-Prieto1, Ling Chen1, Sidharth Jayachandran1, Jeppe S. Brogaard1, Miriam von Bargen1, Laasya Bhagavan1, Tomas Strucko3, Adrian Frey1, Dushica Arsovska1, Erin C. Carr4, Sheila I. Jensen1, Steven D. Harris4, Uffe H. Mortensen3, Jay D. Keasling1,5,6,7,8, Pablo Cruz-Morales1*

1Novo Nordisk Foundation Center for Biosustainability, Technical University of Denmark, Kongens Lyngby, Denmark.

2Department of Chemistry, Technical University of Denmark, Kgs Lyngby, DK-2800, Denmark

3Department of Biotechnology and Biomedicine, Technical University of Denmark, Kgs. Lyngby, Denmark

4Department of Plant Pathology, Entomology and Microbiology, Iowa State University, Ames, IA 50011

5Biological Systems and Engineering Division, Lawrence Berkeley National Laboratory, Berkeley, California, USA

6Joint BioEnergy Institute, Lawrence Berkeley National Laboratory, Emeryville, California, USA

7Department of Chemical and Biomolecular Engineering, University of California, Berkeley, California, USA*

8Department of Bioengineering, University of California, Berkeley, California, USA

*Correspondence [pcruzm@biosustain.dtu.dk](mailto:pcruzm@biosustain.dtu.dk)

1

10-1

10-2

10-3

10-4


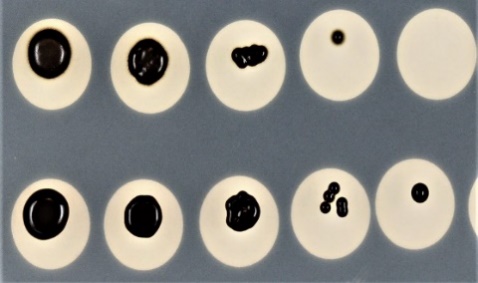

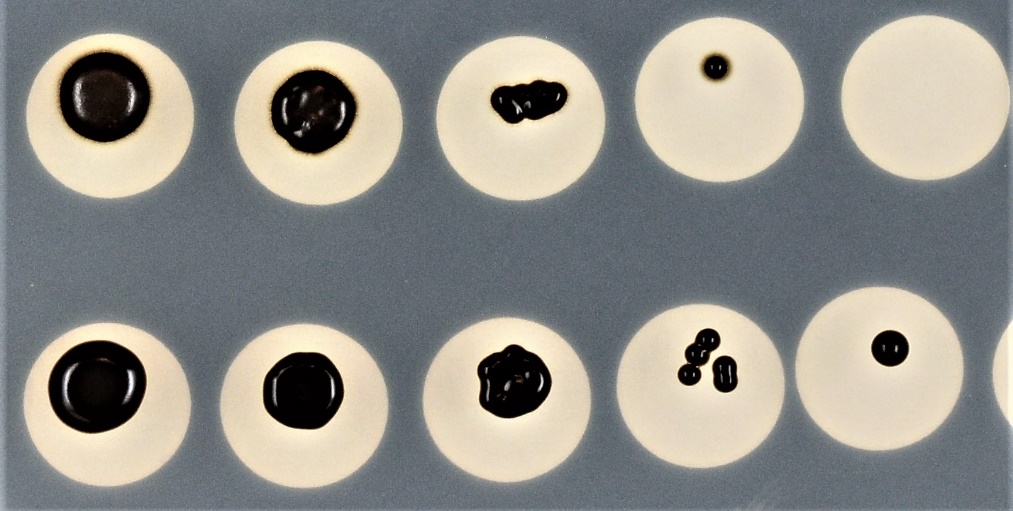

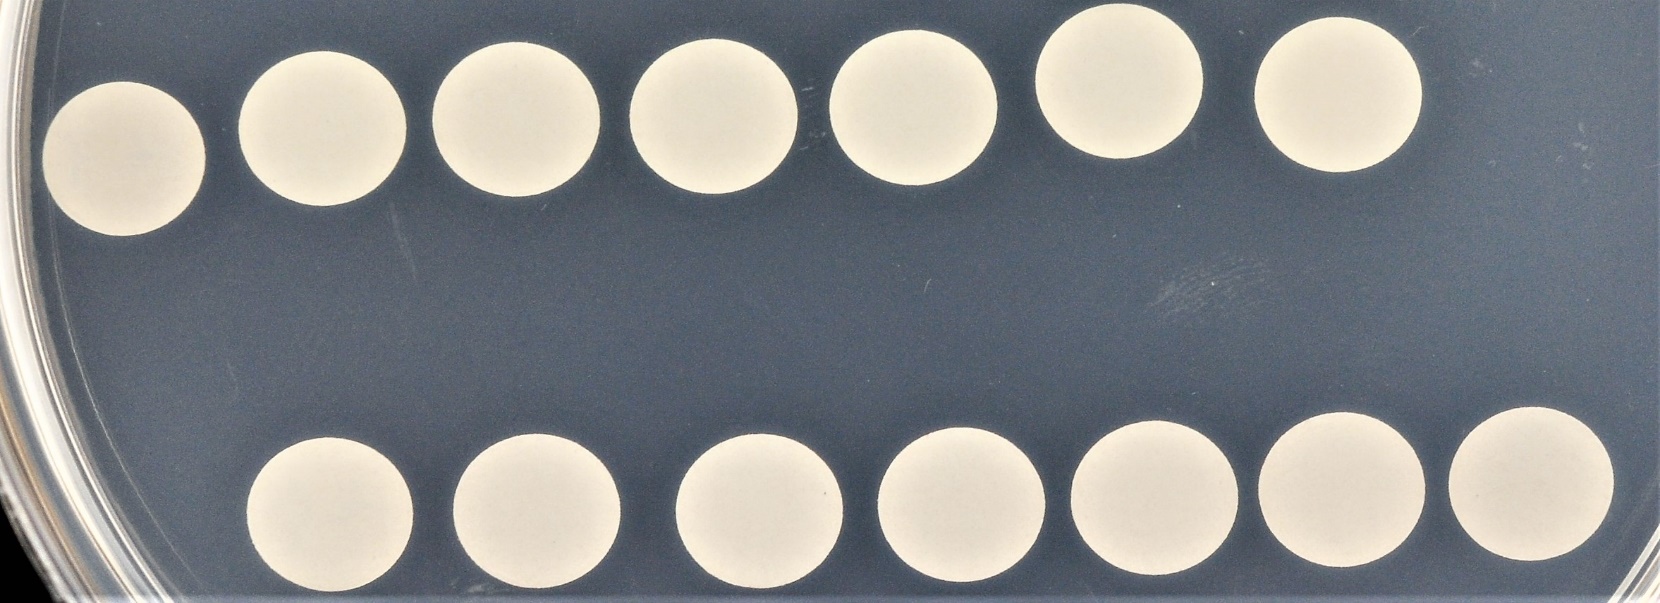

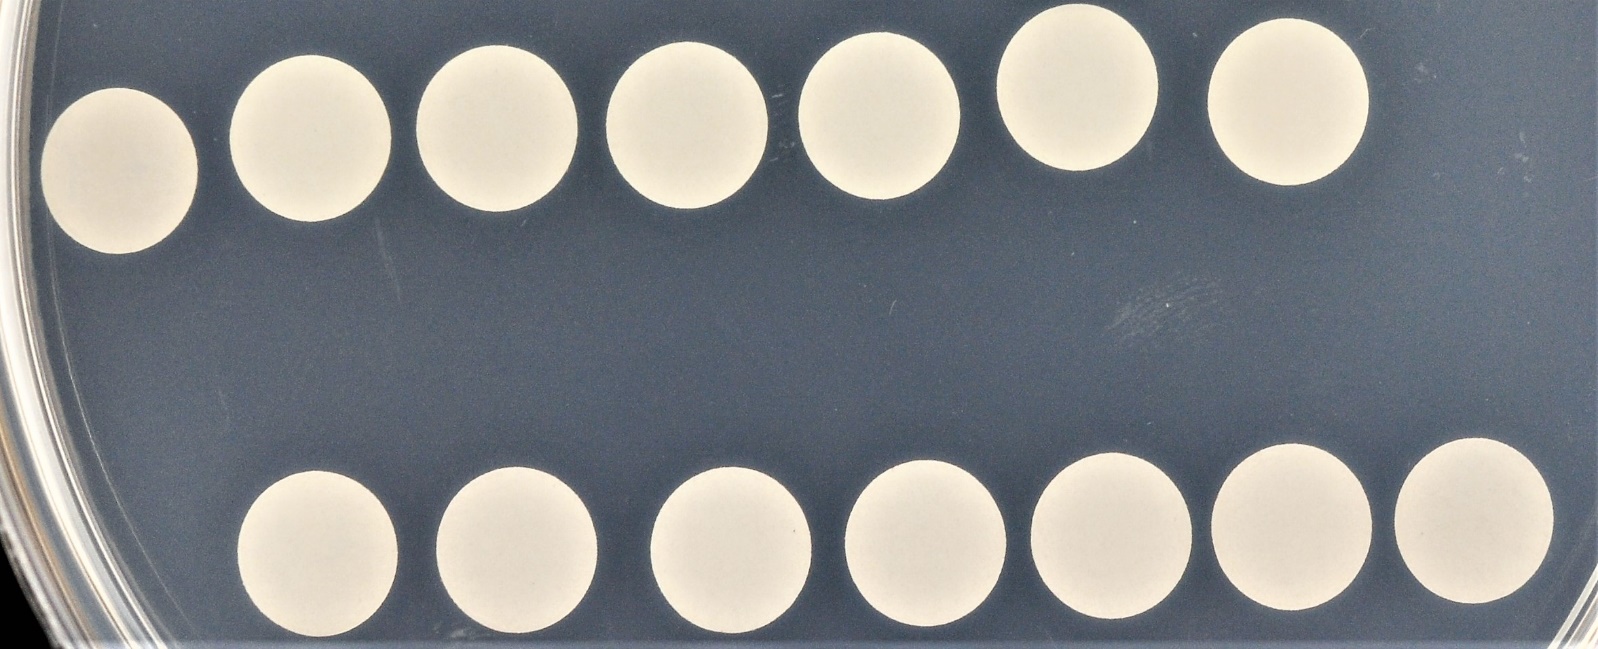


***E. viscosa* JF 03-3F**

***E. viscosa* JF 03-4F**

1

10-1

10-2

10-3

10-4

**Dilution**

**Minimal media**

**Minimal media + 50 µg mL-1 Hygromycin B**

**Supplementary figure 1.** Determination of lethal concentration of Hygromycin B in *E. viscosa* JF 03-3FandJF 03-4F. Serial dilutions of *E. viscosa* starting at 1x107 cells mL-1.

**
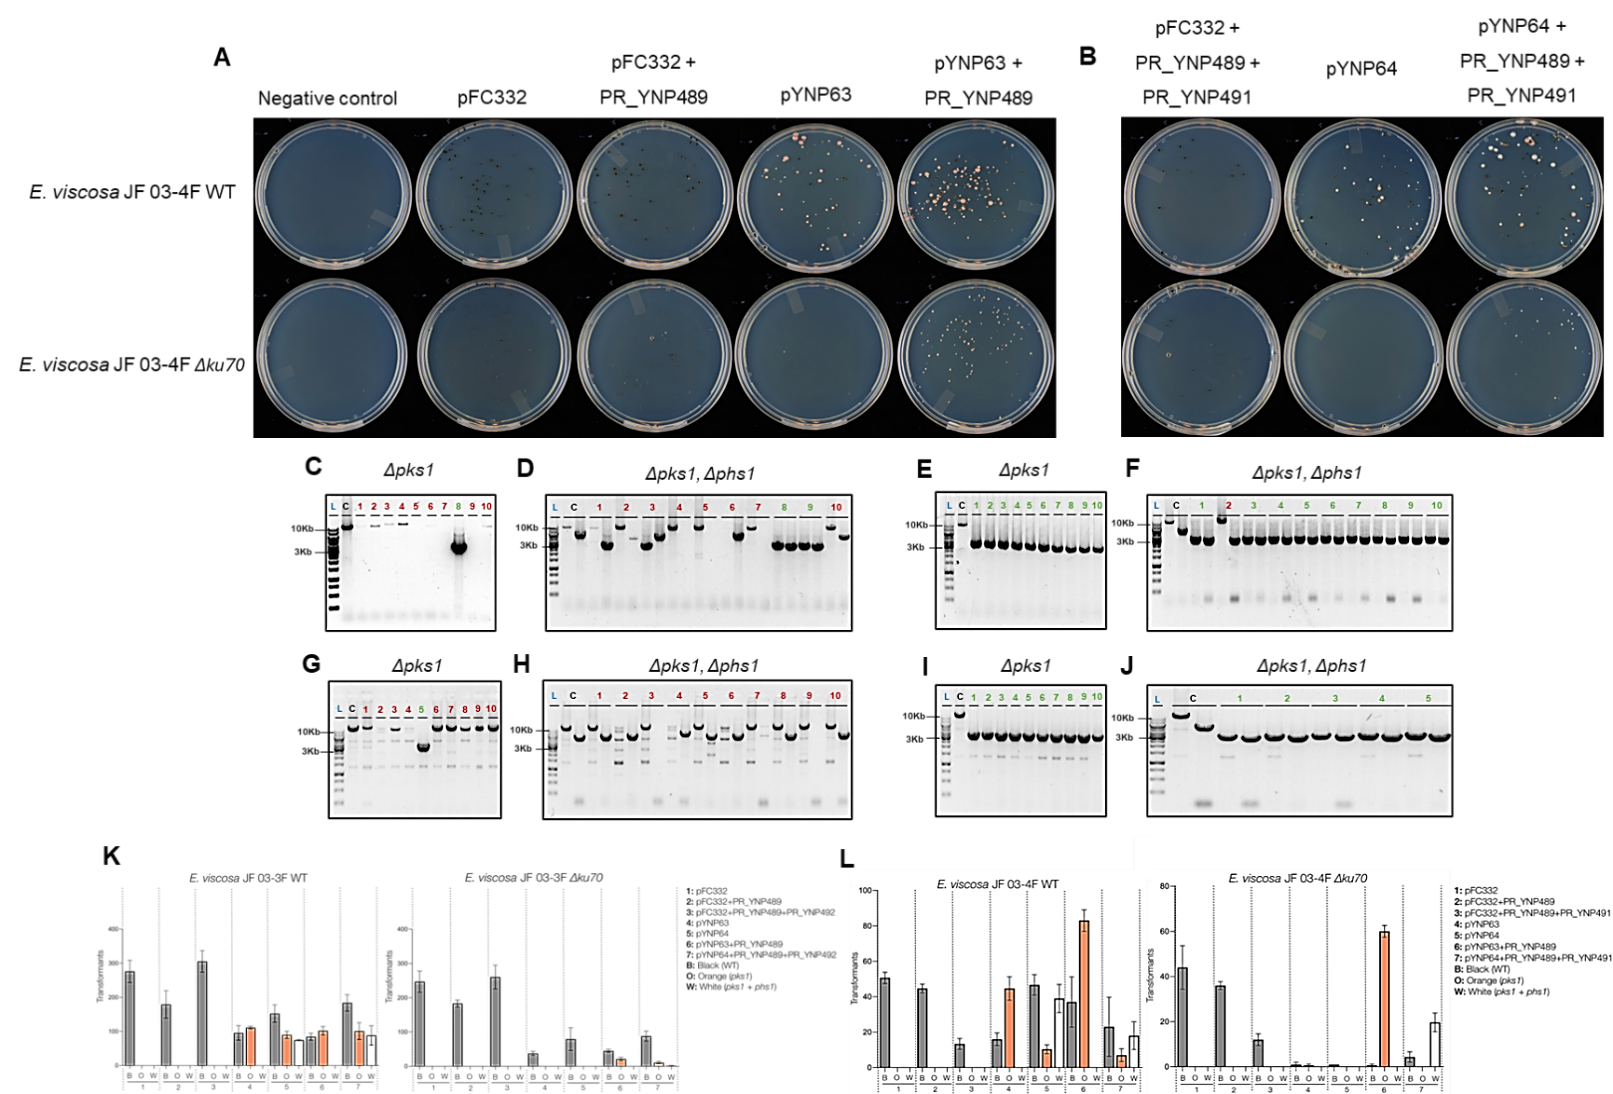
**

**Supplementary figure 2.**  Technique to assess protospacer efficiency1 (TAPE) experiments in *E. viscosa*. **A)** Transformation plates of ssDNA-mediated *pks1* deletions. *Δku70* strains displayed a higher lethality compared with the WT when transformed with pYNP63; **B)** Transformation plates of ssDNA-mediated *pks1-phs1* deletions. *Δku70* strains displayed a higher lethality compared with the WT when transformed with pYNP64; **C)** diagnostic PCRs of *E. viscosa* JF 03-4F WT transformants displaying an orange phenotype. One transformant out of ten successfully deleted *pks1* (in green, well 8); **D)** diagnostic PCRs of *E. viscosa* JF 03-4F WT transformants displaying a white phenotype. Two transformants out of ten successfully deleted *pks1-phs1* (in green, wells 8 and 9); **E)** diagnostic PCRs of *E. viscosa* JF 03-4F *Δku70* transformants displaying an orange phenotype. All analyzed transformants successfully deleted *pks1* (in green, wells 1 to 10); **F)** diagnostic PCRs of *E. viscosa* JF 03-4F *Δku70* transformants displaying a white phenotype. Nine transformants out of ten successfully deleted *pks1-phs1* (in green, wells 1, and 3 to10); **G)** diagnostic PCRs of *E. viscosa* JF 03-3F WT transformants displaying an orange phenotype. One transformant out of ten successfully deleted *pks1* (in green, well 5); **H)** diagnostic PCRs of *E. viscosa* JF 03-3F WT transformants displaying a white phenotype. Transformants with full *pks1-phs1* deletions were not found; **I)** diagnostic PCRs of *E. viscosa* JF 03-3F *Δku70* transformants displaying an orange phenotype. All analyzed transformants successfully deleted *pks1* (in green, wells 1 to 10); **J)** diagnostic PCRs of *E. viscosa* JF 03-3F *Δku70* transformants displaying a white phenotype. Five transformants out of five successfully deleted *pks1-phs1* (in green, wells 1 to 5); **K)** Colony counting during TAPE experiments in *E. viscosa* JF 03-3F. The WT strain can repair its DNA by NHEJ when transformed with Cas9-sgRNA plasmids targeting *pks1* and *pks1-phs1*. In contrast, a higher lethality was observed in *Δku70* strains since NHEJ pathway is not active. When a ssDNA oligo was provided, *Δku70* strains can repair a DNA double strand brake and deleted the targeted genes; **L)** Colony counting during TAPE experiments in *E. viscosa* JF 03-4F. The WT strain can repair its DNA by NHEJ when transformed with Cas9-sgRNA plasmids targeting *pks1* and *pks1-phs1*. In contrast, a higher lethality was observed in *Δku70* strains since NHEJ pathway is not active. When a ssDNA oligo was provided, *Δku70* strains can repair a DNA double strand brake and deleted the targeted genes.

**
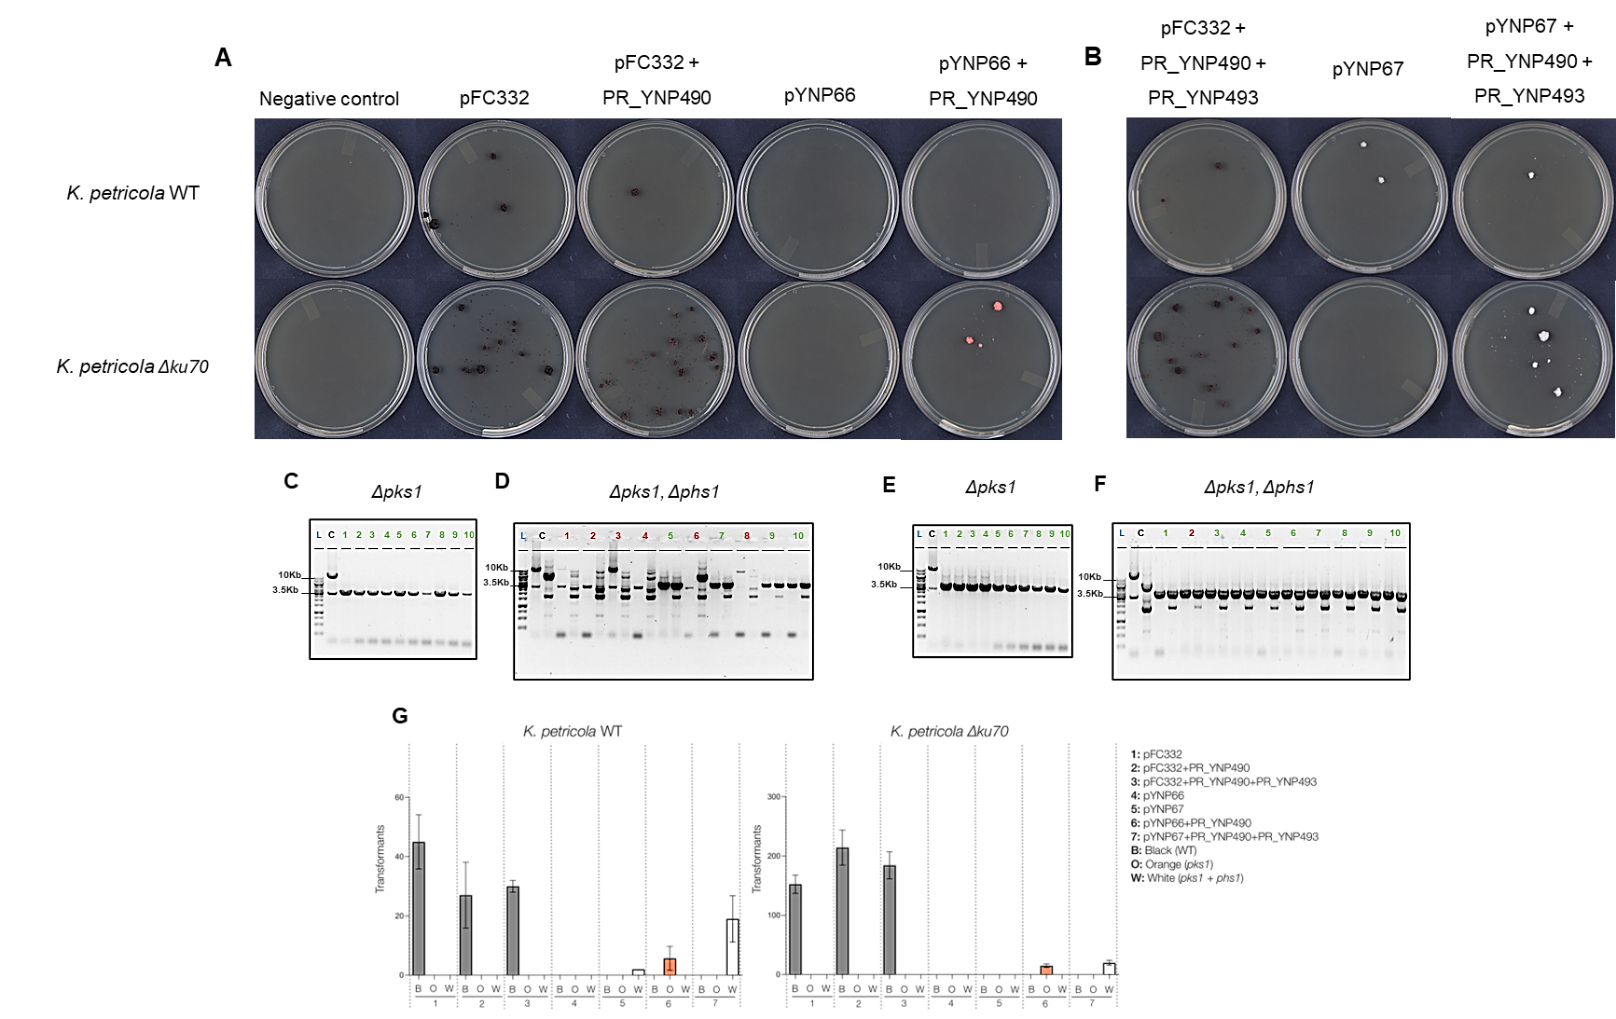
**

**Supplementary figure 3** Technique to assess protospacer efficiency1 (TAPE) *K. petricola*. **A)** Transformation plates of ssDNA-mediated *pks1* deletions. Similar lethality was observed in both WT and *Δku70* strains when transformed with pYNP66; **B)** Transformation plates of ssDNA-mediated *pks1-phs1* deletions. *Δku70* strains displayed a higher lethality compared with the WT when transformed with pYNP67; **C)** diagnostic PCRs of *K. petricola* WT transformants displaying an orange phenotype. All analyzed transformants successfully deleted *pks1* (in green, wells 1- 10); **D)** diagnostic PCRs of *K. petricola* WT transformants displaying a white phenotype. Three transformants out of ten successfully deleted *pks1-phs1* (in green, wells 5, 7, 9, and 10); **E)** diagnostic PCRs of *K. petricola Δku70* transformants displaying an orange phenotype. All analyzed transformants successfully deleted *pks1* (in green, wells 1 to 10); **F)** diagnostic PCRs of *K. petricola* *Δku70* transformants displaying a white phenotype. Nine transformants out of ten successfully deleted *pks1-phs1* (in green, wells 1, and 3 to10); **G)** Colony counting during TAPE experiments in *K. petricola*. Similar number of colonies were obtained in WT and *Δku70* when transformed with Cas9-sgRNA plasmids targeting *pks1* and *pks1-phs1*.

**
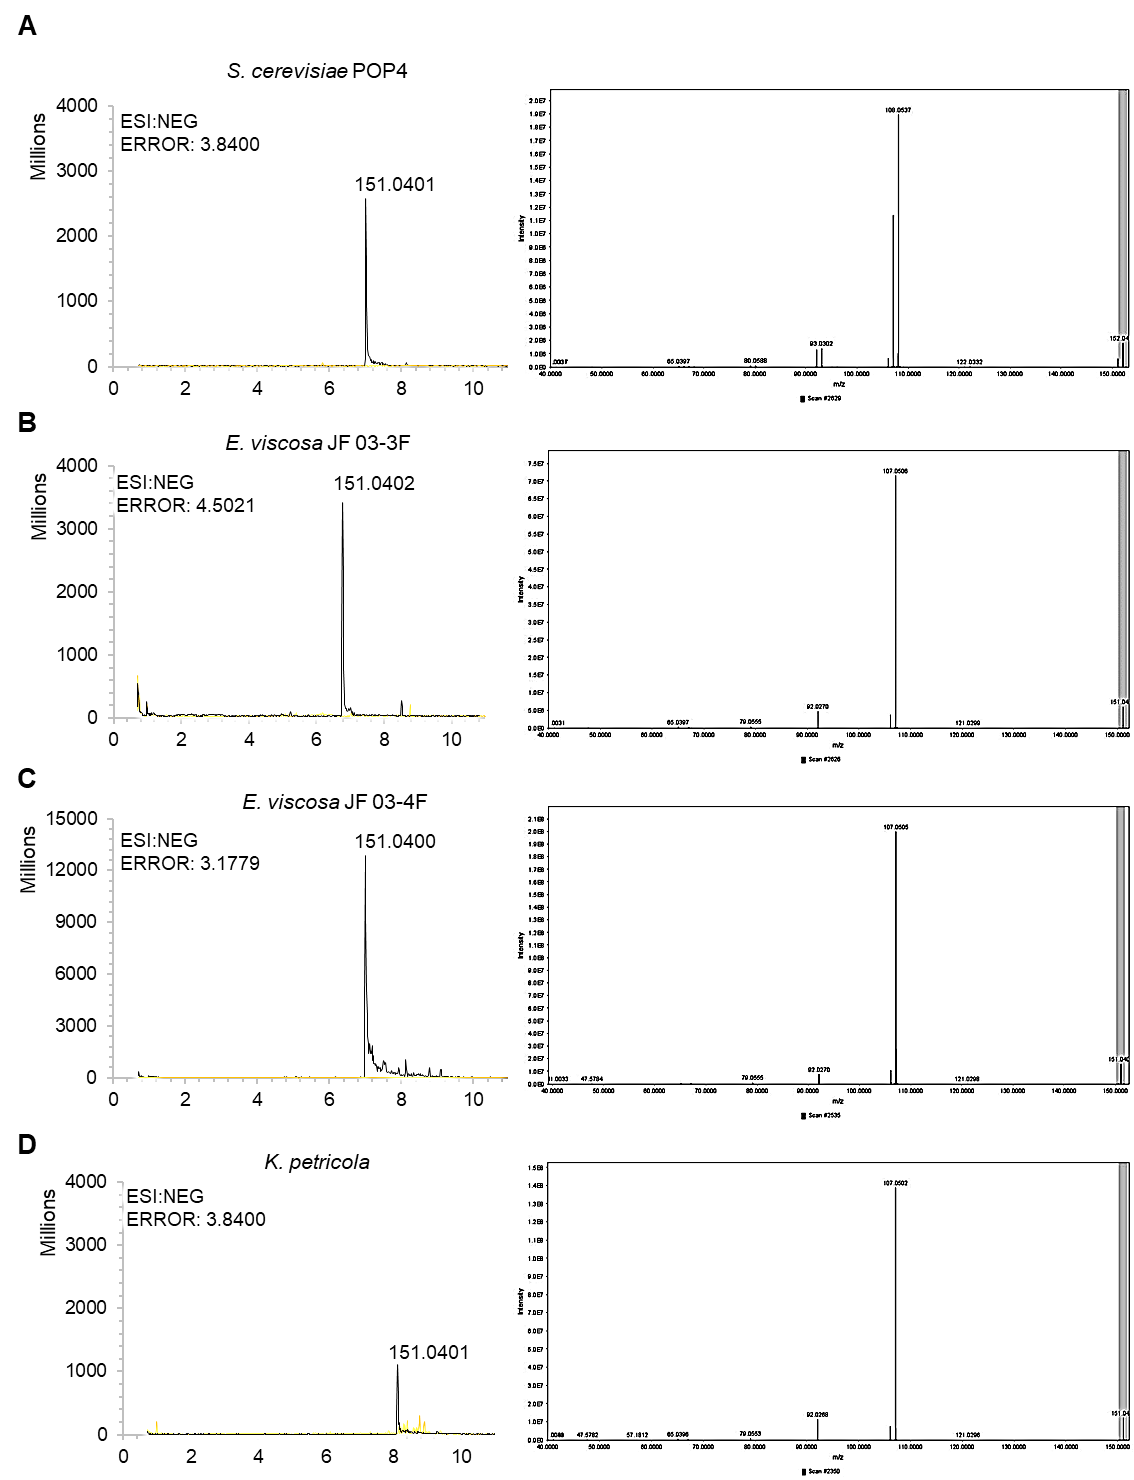
**

**Supplementary figure 4.** Total ion chromatograms and mass fragmentation spectrum of 6-MSA obtained from the LC-MS analysis of extracts from producer strains. **A)** *S. cerevisiae* POP4; **B)** *E. viscosa* JF 03-3F; **C)** *E. viscosa* JF 03-4F; **D)** *K. petricola*. Chromatograms are displayed in negative mode.

**
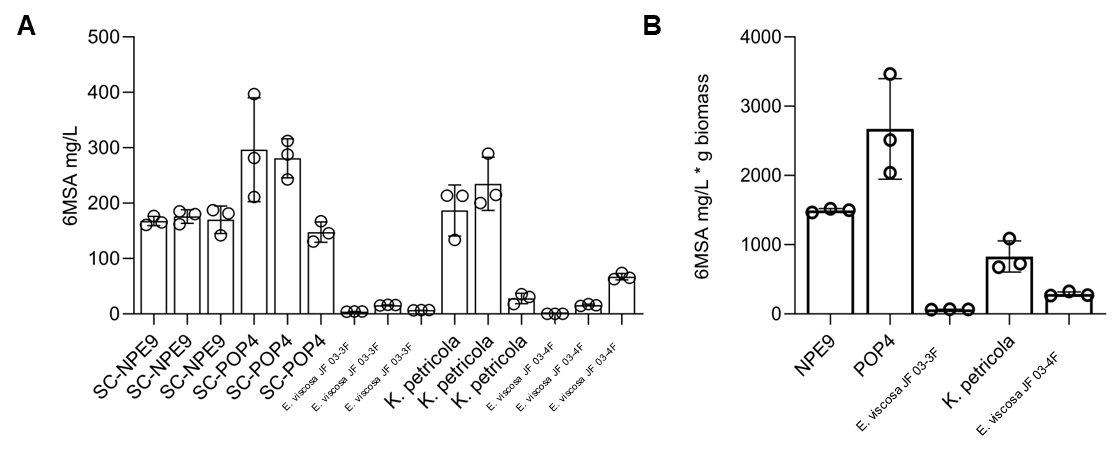
**

**Supplementary figure 5.** Absolute and relative concentrations of 6-MSA producing strains. **A)** absolute concentrations of 6-MSA. *S. cerevisiae* NPE9_1: 167.55 mg/L +- 8.30mg, NPE9_2: 175.83 mg/L +- 12.36 mg, NPE9_3: 170.18 mg/L +- 24.80 mg; *S. cerevisiae* POP4_1: 296.33 mg/L +- 93.79 mg, POP4_2: 280.90 mg/L +- 35.25 mg, POP4_3: 147.81 mg/L +- 18.39 mg; *E. viscosa* JF 03-3F_1: 4.11 mg/L +- 0.19 mg, JF 03-3F_2: 15.80 mg/L +- 0.66 mg, JF 03-3F_3: 6.78 mg/L +- 0.26 mg; *E. viscosa* JF 03-4F_1: 0 mg/L, JF 03-4F_2: 15.98 mg/L +- 1.62 mg, JF 03-4F_3: 67.31 mg/L +- 5.88 mg; *K. petricola*_1: 186.80 mg/L +- 46.02 mg, *K. petricola*_2: 234.85 mg/L +- 47.92 mg, *K. petricola*_3: 27.96 mg/L +- 9.36 mg; **B)** relative concentrations of 6-MSA in the highest average producer replicate. *S. cerevisiae* NPE9_2) 1.494 g/L +- 27.19 mg; *S. cerevisiae* POP4_1: 2.671 g/L +- 726.64 mg; *E. viscosa* JF 03-3F_2: 64.47 mg/L +- 3.72 mg; *E. viscosa* JF 03-4F_3: 286.99 mg/L +- 32.49 mg; *K. petricola*_2: 829.84 mg/L +- 225.58 mg.

**
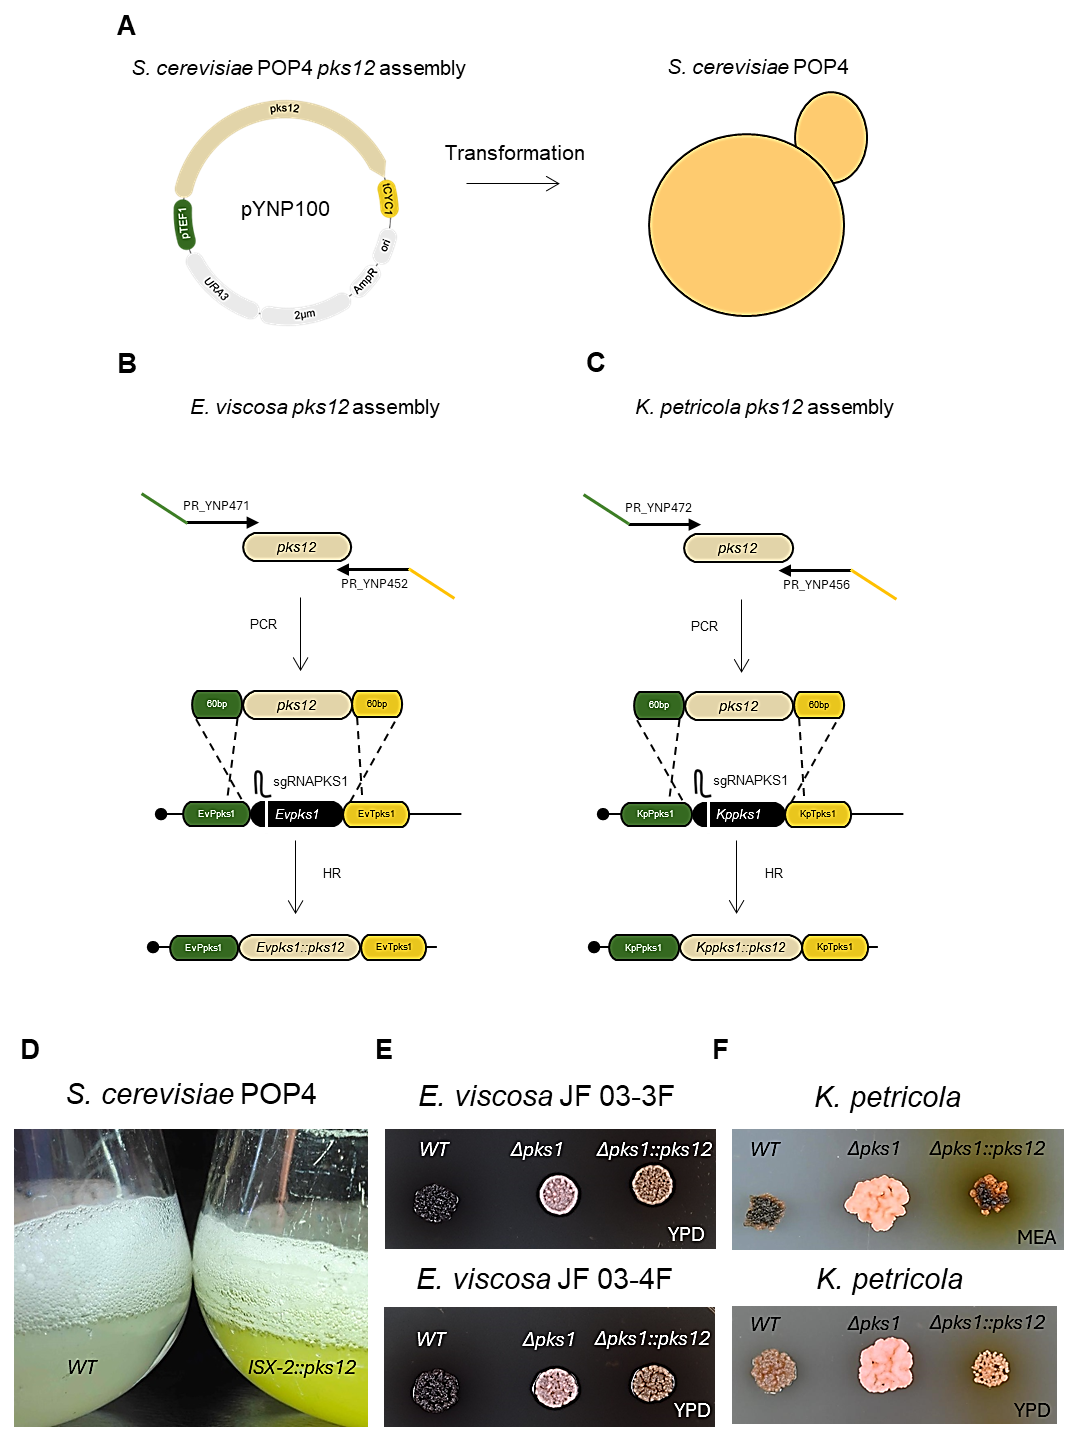
**

**Supplementary figure 6.** *pks12* assembly and heterologous expression. **A)** A 2µ high-copy plasmid (pYNP100) containing an intron-less *F. acaciae-mearnsii pks12* gene under the control of *S. cerevisiae* TEF1 promoter and CYC1 terminator was transformed into *S. cerevisiae* POP4. Image created with BioRender.com; **B)** *F. acaciae-mearnsii pks12* was PCR-amplified from pYNP100 using primers flanked with 60bp homology to the *E. viscosa* pks1 promoter and terminator, and the PCR product was transformed together with plasmid pYNP63 to integrate it into the *pks1* locus, taking advantage of the endogenous pks1 promoter and terminator during YWA1 production; **C)** *F. acaciae-mearnsii pks12* was PCR-amplified from pYNP100 using primers flanked with 60bp homology to the *K. petricola pks1* promoter and terminator, and the PCR product was transformed together with plasmid pYNP66 to integrate it into the *pks1* locus, taking advantage of the endogenous pks1 promoter and terminator during YWA1 production; **D)** A yellow phenotype was observed in *S. cerevisiae* POP4 during production of YWA1 in liquid cultures; **E)** A brown phenotype was observed in colonies of *E. viscosa* YWA1 producer strains; **F)** A brown phenotype was observed in colonies of *K. petricola* YWA1 producer strains.

**
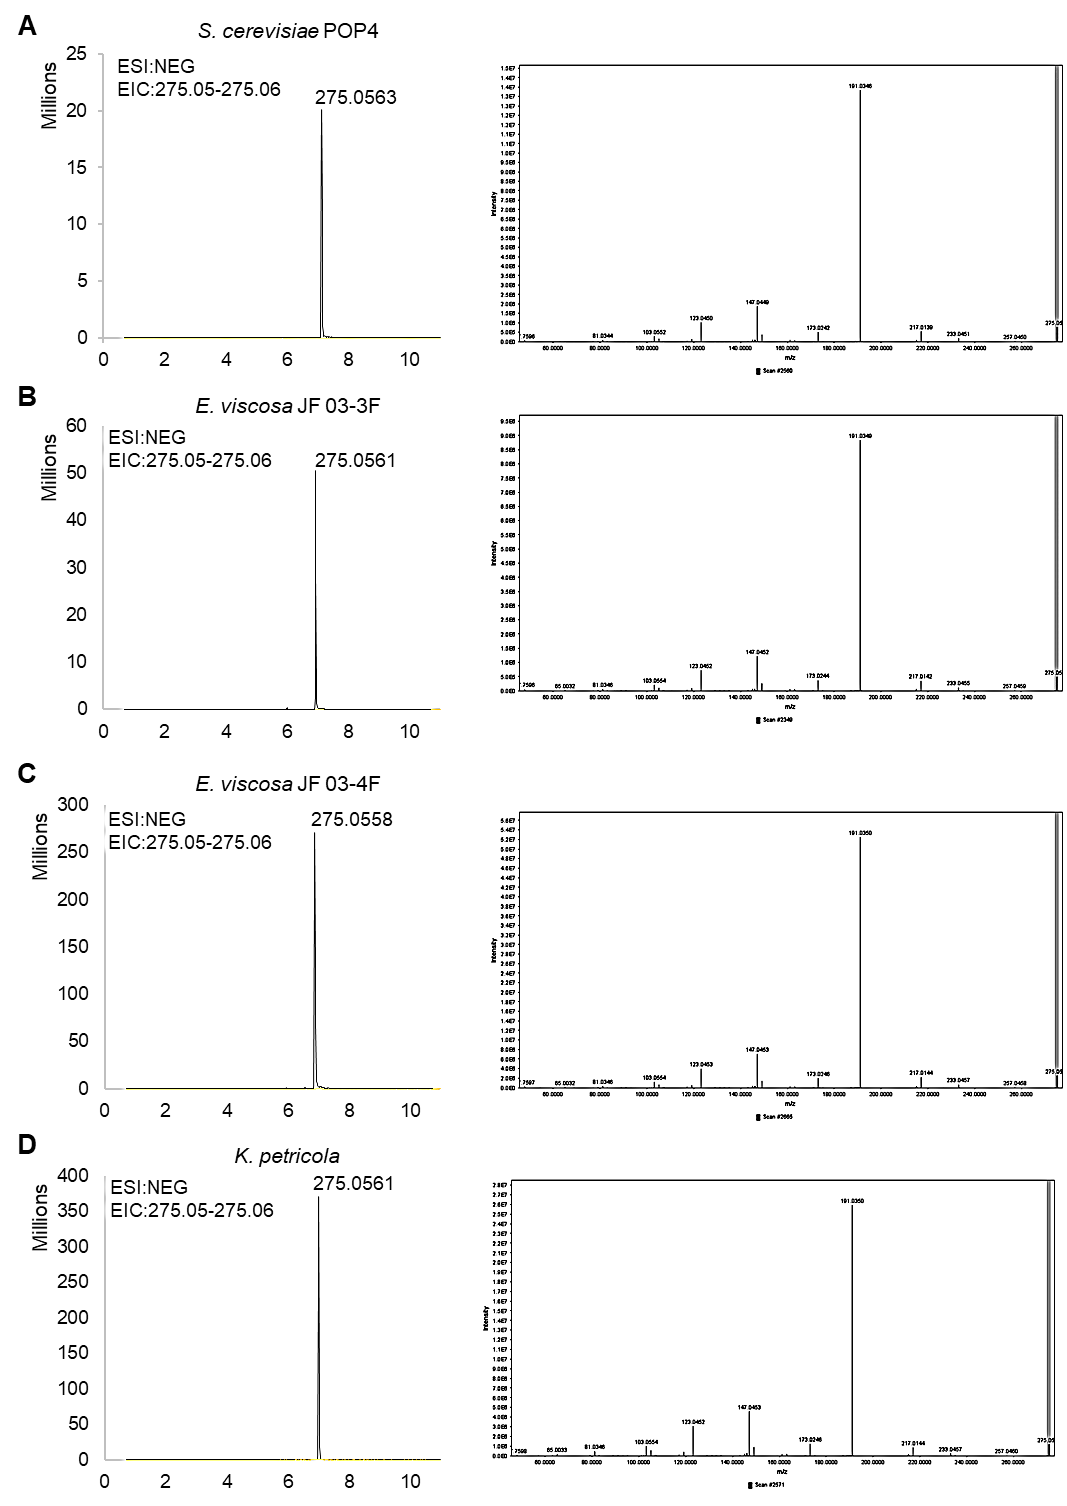
**

**Supplementary figure 7.** Extracted ion chromatograms (*m/z* 275.05556 calculated for [C14H11O6]+ ) and mass fragmentation spectrum of YWA1 obtained from LC-MS analysis of extracts from producer strains. **A)** *S. cerevisiae* POP4; **B)** *E. viscosa* JF 03-3F; **C)** *E. viscosa* JF 03-4F; **D)** *K. petricola*. Chromatograms are displayed in negative mode.

**
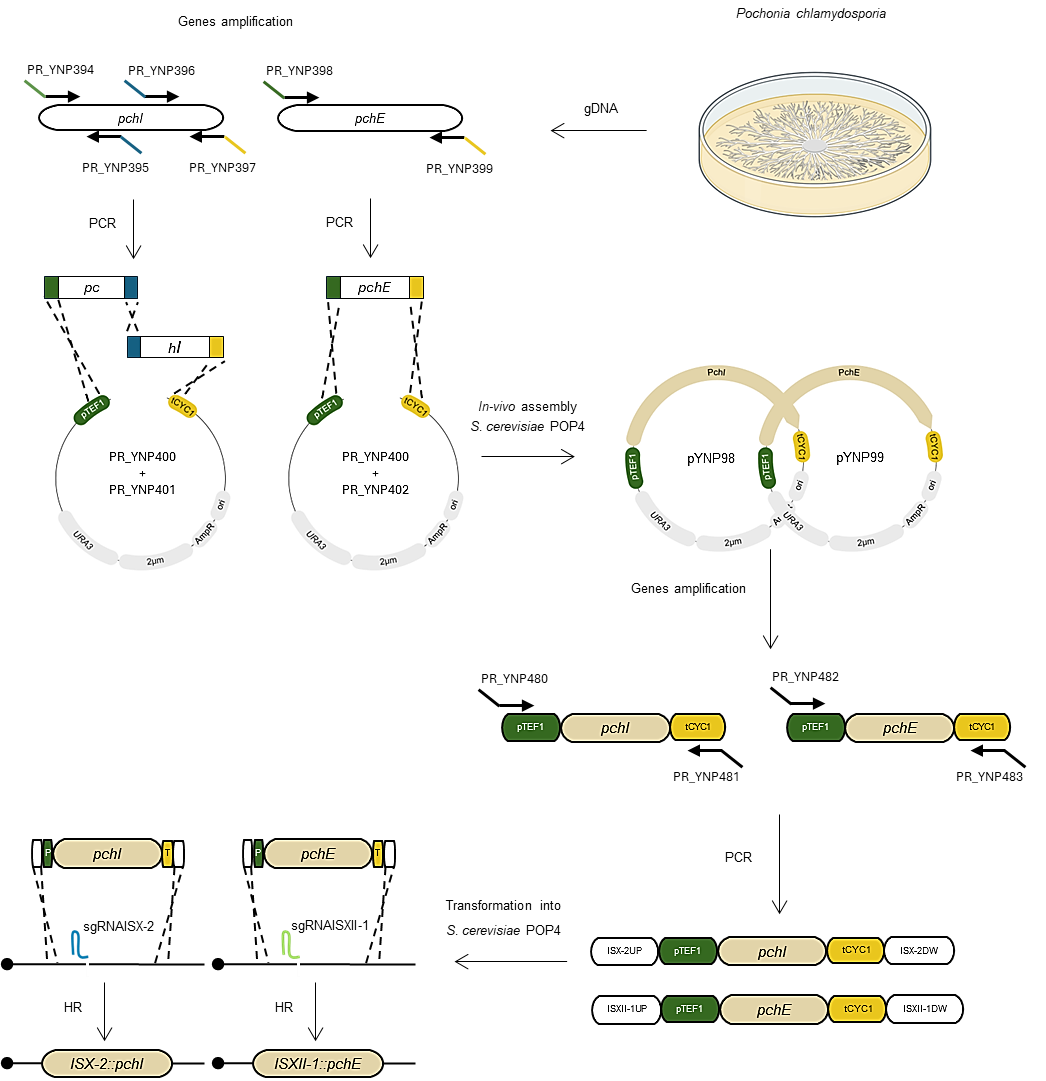
**

**Supplementary figure 8.** Monocillin II assembly and heterologous expression in *S. cerevisiae* POP4. Intron-less *pchI* and *pchE* genes were PCR-amplified from *P. chlamydosporia* genomic DNA and assembled *in-vivo* into 2µ high-copy plasmid backbones containing TEF1 promoter and CYC1 terminator using *S. cerevisiae* POP4, resulting in plasmids pYNP98 and pYNP99. Thereafter, *pchI* and *pchE* genes were PCR-amplified from assembled plasmids pYNP98 and pYNP99 using primers flanked with 60bp homology sequences to ISX-2 and ISXII-1. Finally, the obtained PCRs were transformed into *S. cerevisiae* POP4 together with a Cas-sgRNA plasmid (pYNP120) and integrated into *S. cerevisiae* POP4 genome. Image created with BioRender.com

**
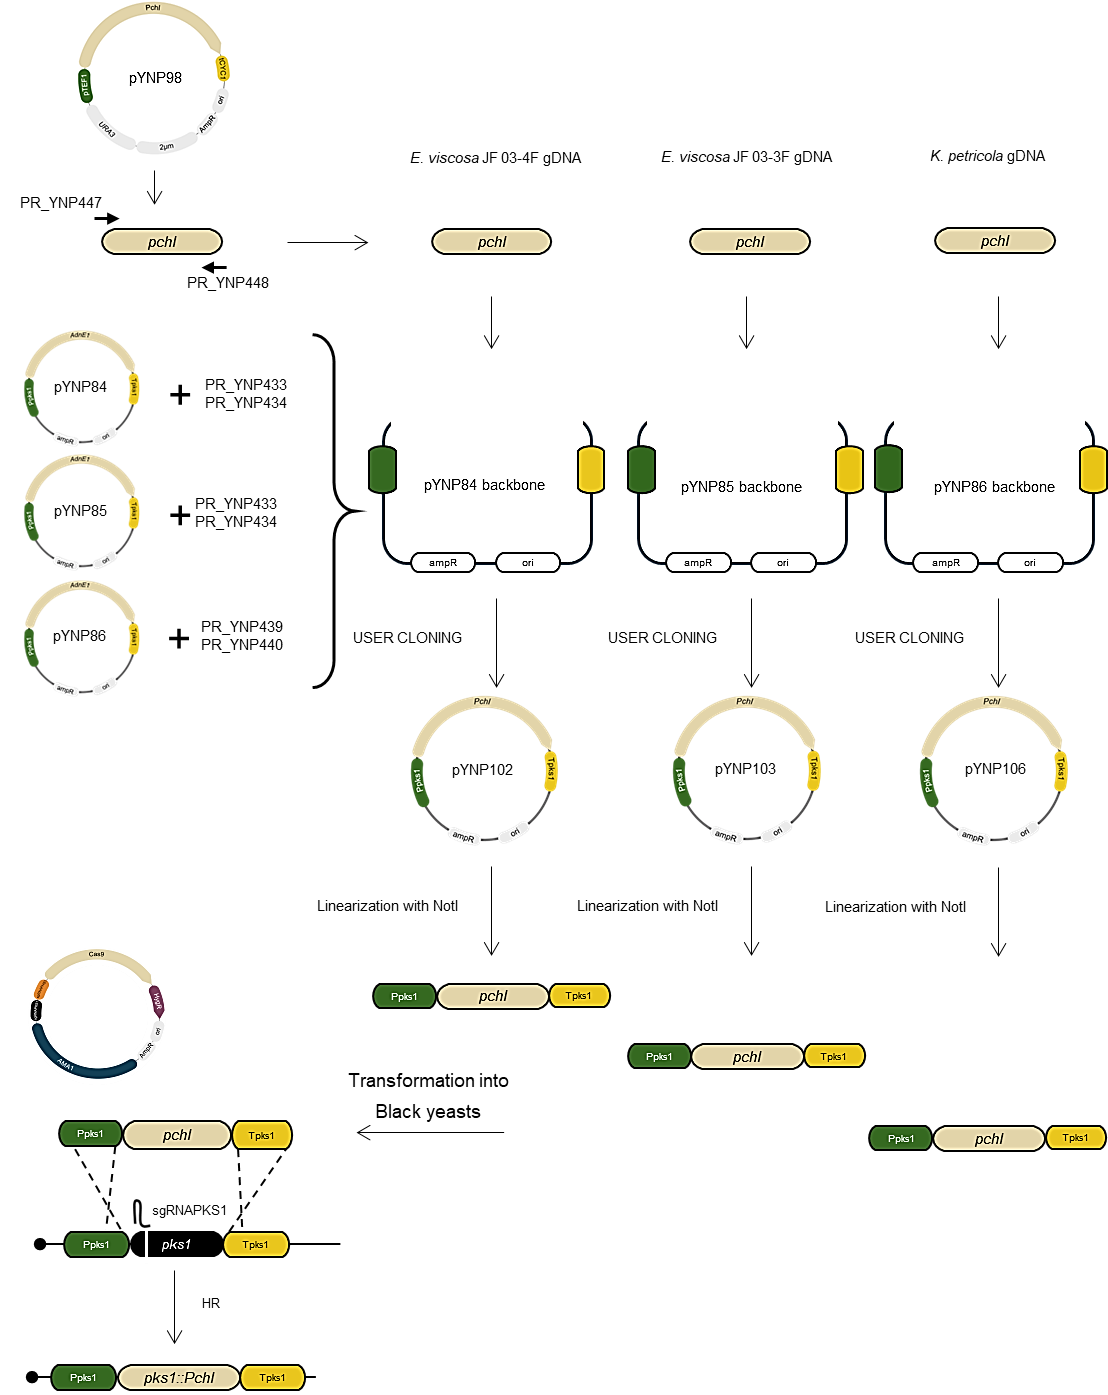
**

**Supplementary figure 9.** Monocillin II *pchI* assembly and heterologous expression in black yeasts. *pchI* was PCR-amplified from pYNP98 and cloned into plasmid backbones pYNP84, pYNP85, pYNP86. Thereafter, *pchI* constructs were linearized and transformed into black yeasts together with a Cas9-sgRNA plasmid targeting the *pks1-phs1* loci. Image created with BioRender.com

**
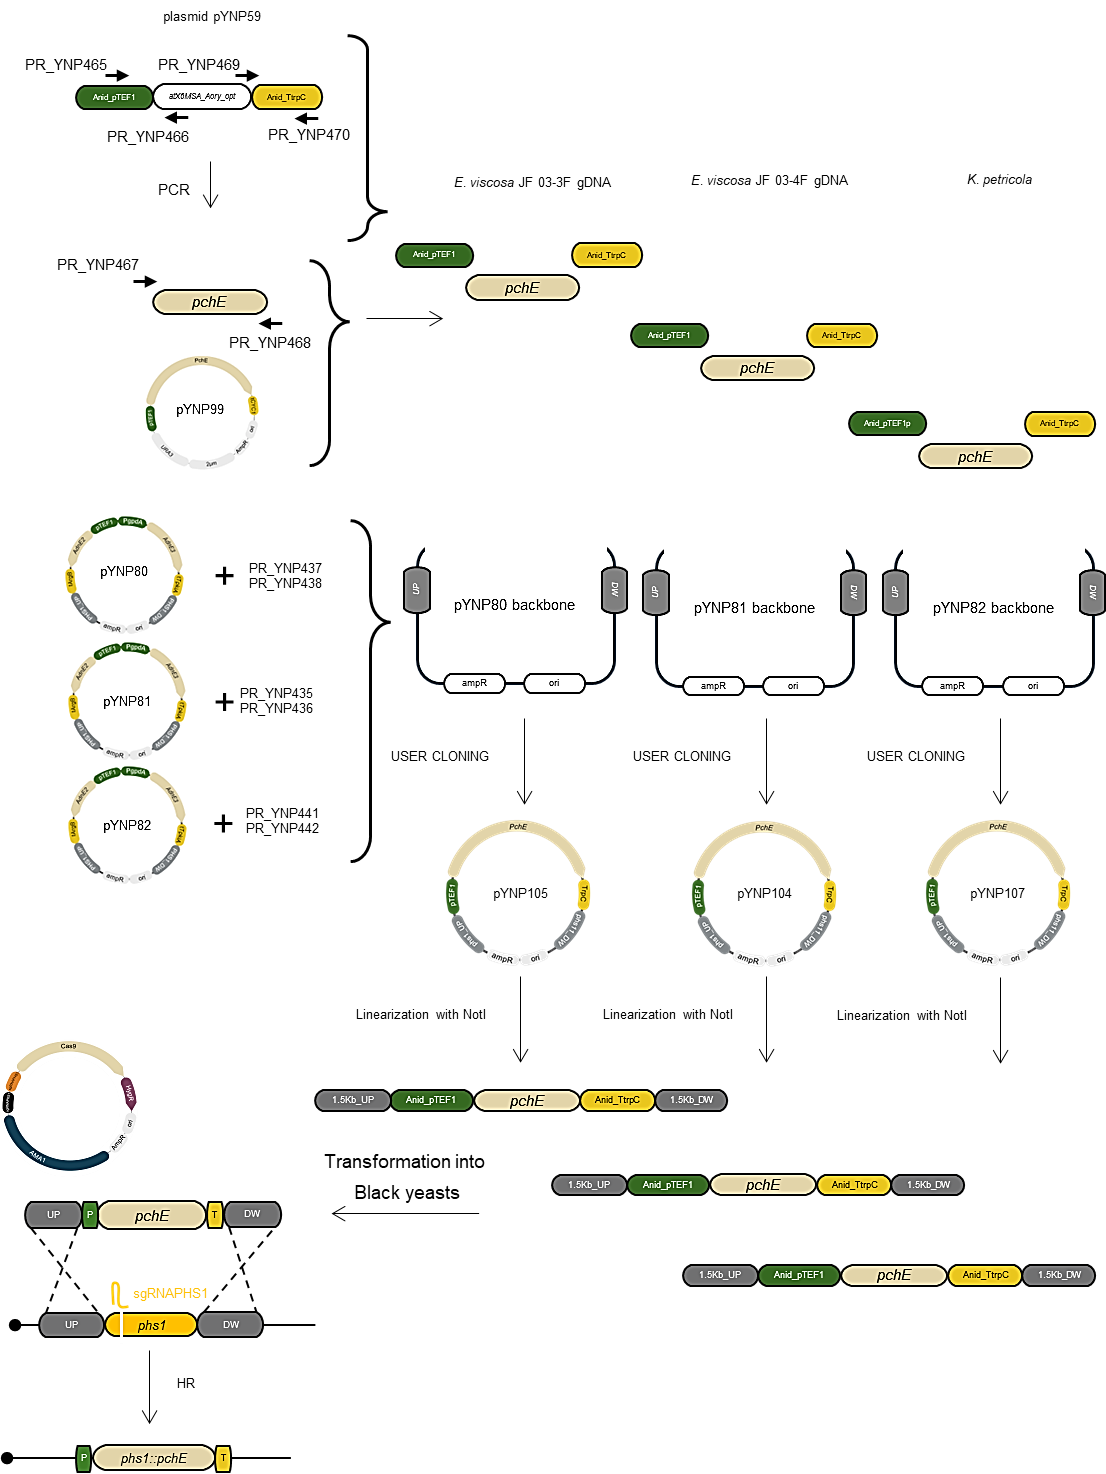
**

**Supplementary figure 10.** Monocillin II *pchE* assembly and heterologous expression in black yeasts. *A. nidulans* TEF1 promoter and *trpC* terminator were amplified from plasmid pYNP59, and *pchE* was PCR-amplified from pYNP99. PCRs products were cloned into plasmid backbones pYNP105, pYNP104, pYNP107. Thereafter, *pchE* constructs were linearized and transformed into black yeasts together with a Cas9-sgRNA plasmid targeting the *pks1-phs1* loci. Image created with BioRender.com

**
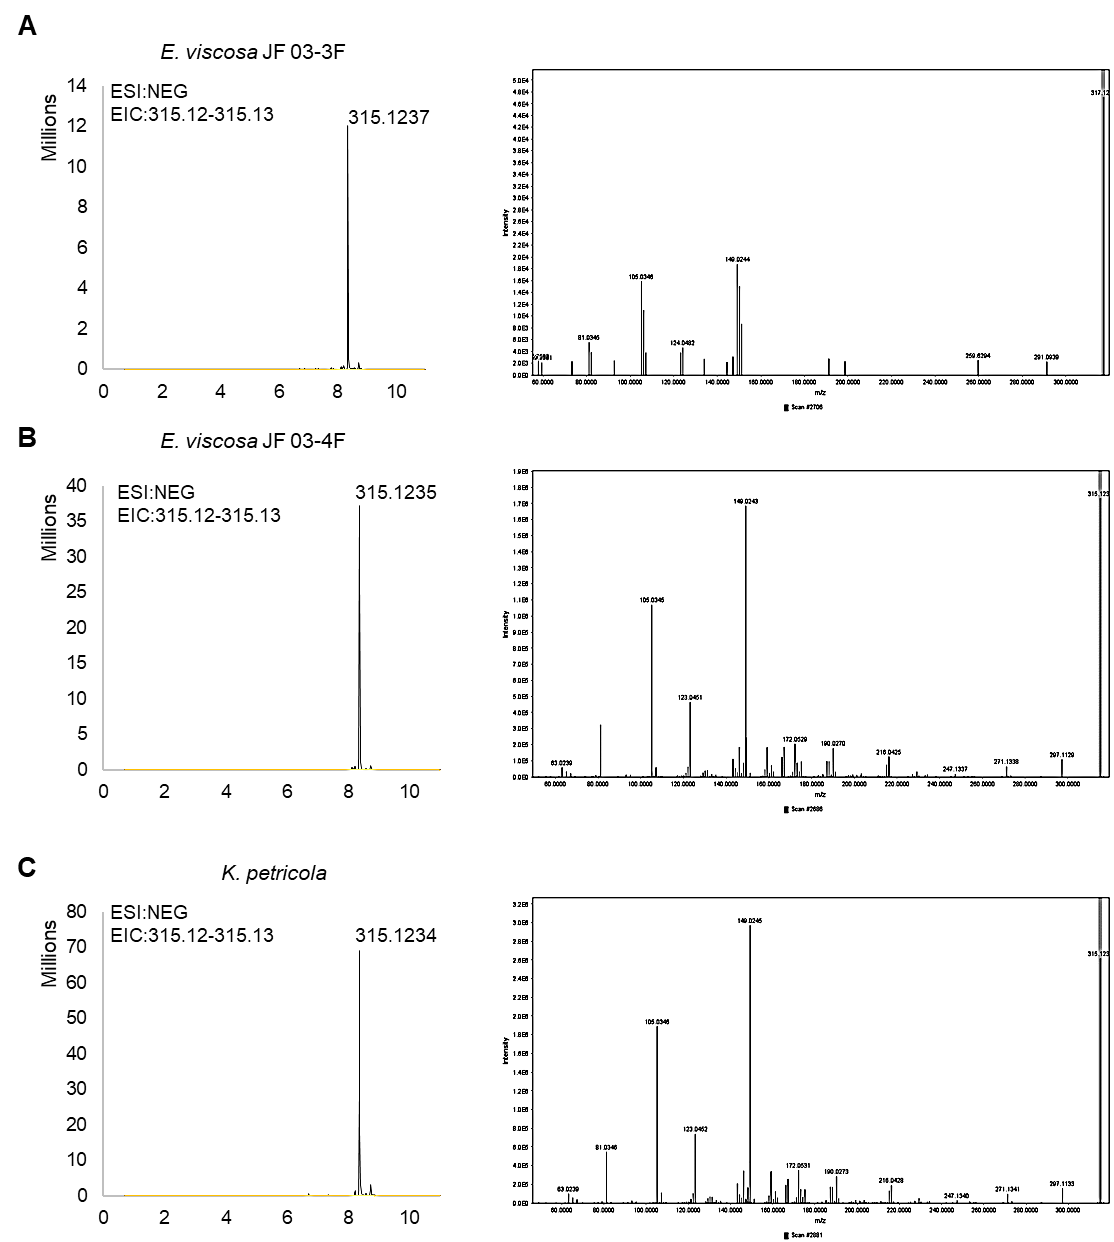
**

**Supplementary figure 11.**

Extracted ion chromatograms (*m/z* 315.1232 calculated for [C18H19O5]+ ) and mass fragmentation spectrum of Monocillin II obtained from LC-MS analysis of extracts from producer strains.

**A)** *E. viscosa* JF 03-3F; **B)** *E. viscosa* JF 03-4F; **C)** *K. petricola*. Chromatograms are displayed in negative mode. **.**

**
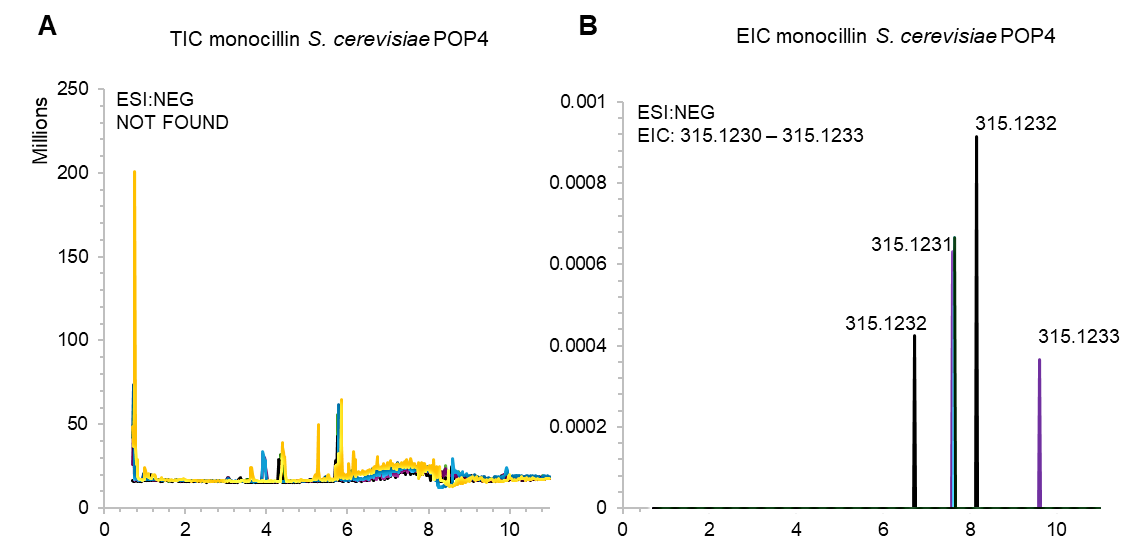
**

**Supplementary figure 12.** Monocillin II expression in *S. cerevisiae* POP4. **A)** Total ion chromatogram obtained from LC-MS analysis of *S. cerevisiae* POP4 extracts.; **B)** Extracted ion chromatogram for m/z 315.1232 calculated for [C18H19O5]+. Control is shown in yellow and samples of four biological replicates are shown in black, blue, purple, and green colors. Chromatograms are displayed in negative mode.

**
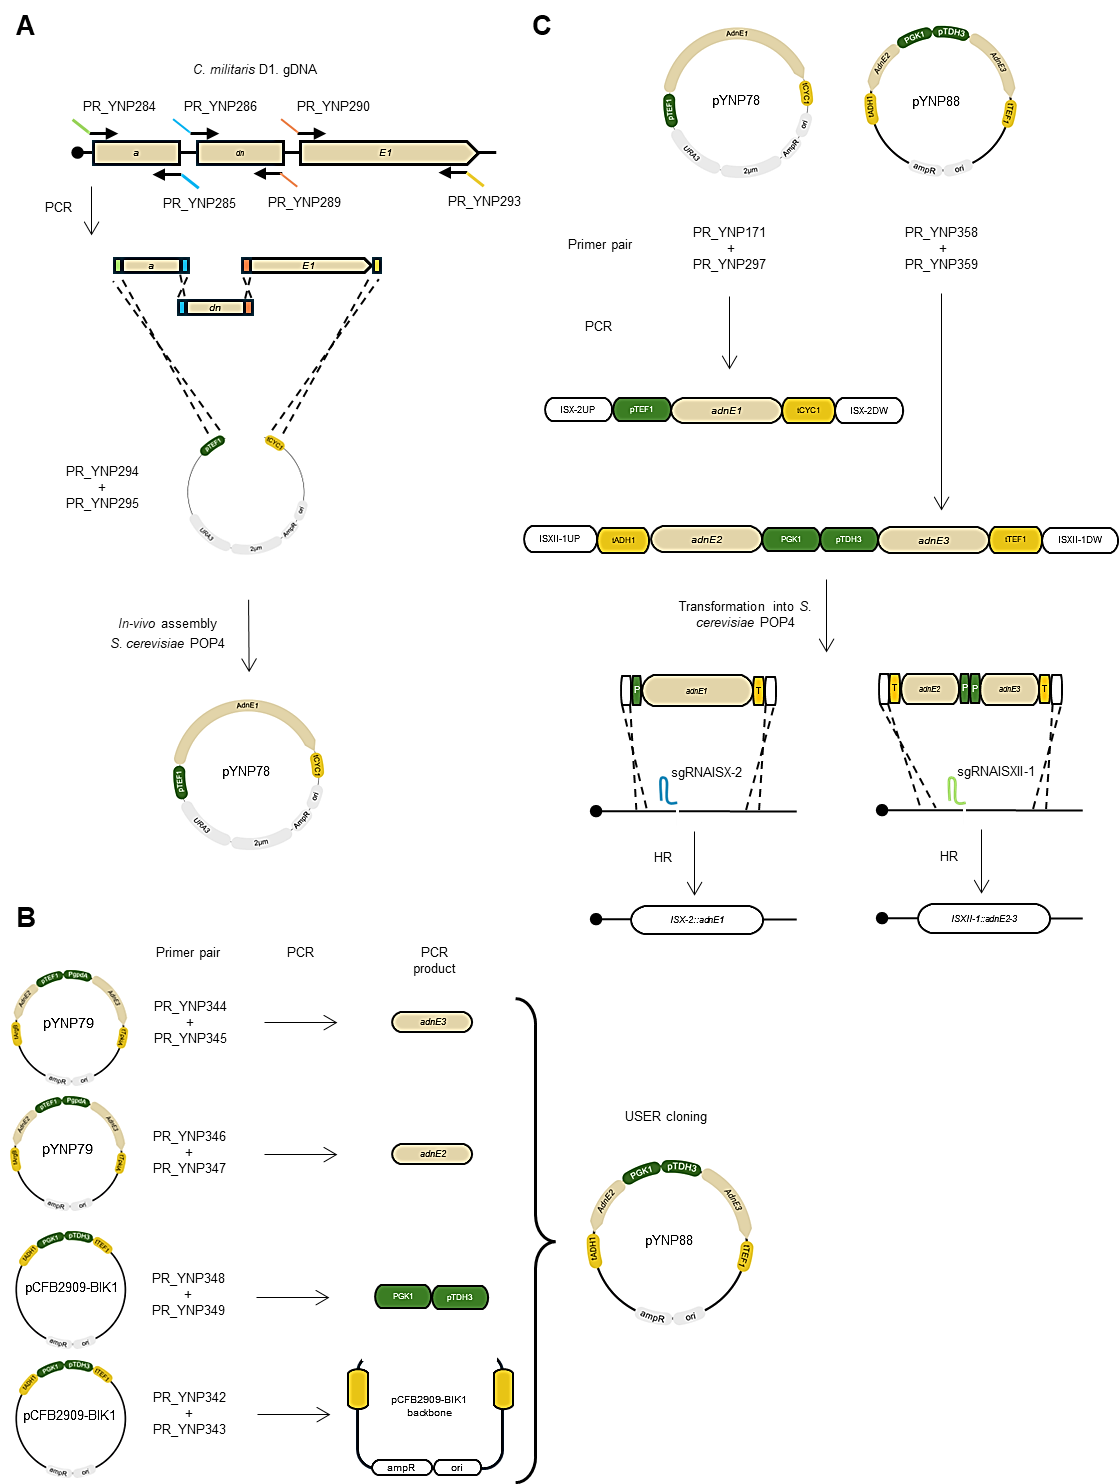
**

**Supplementary figure 13.** *adnE* assembly and heterologous expression in *S. cerevisiae* POP4. **A)** *adnE1* exons were amplified from *C. militaris* D1.genomic DNA and *in-vivo* assembled in *S. cerevisiae* POP4, resulting in plasmid pYNP78 expressing *adnE1* under the control of TEF1 promoter and CYC1 terminator; **B)** *adnE2* and *adnE3* were amplified from plasmid pYNP79, and PGK1 and TDH3 promoters were amplified from pCFB2909. PCR products were cloned into pCFB2909 backbone, resulting in plasmid pYNP88 expressing *adnE2* and *adnE3* under the control PGK1and TDH3 promoters, and ADH1 and TEF1 terminators, respectively; **C)** *adnE1, adnE2,* and *adnE3* were PCR-amplified from plasmids pYNP78 and pYNP88 using primers with 60bp homology to the integration sites ISX-2 and ISXII-1, and transformed into *S. cerevisiae* POP4 together with a Cas9-sgRNA plasmid pYNP120 targeting both integration sites. Image created with BioRender.com

**
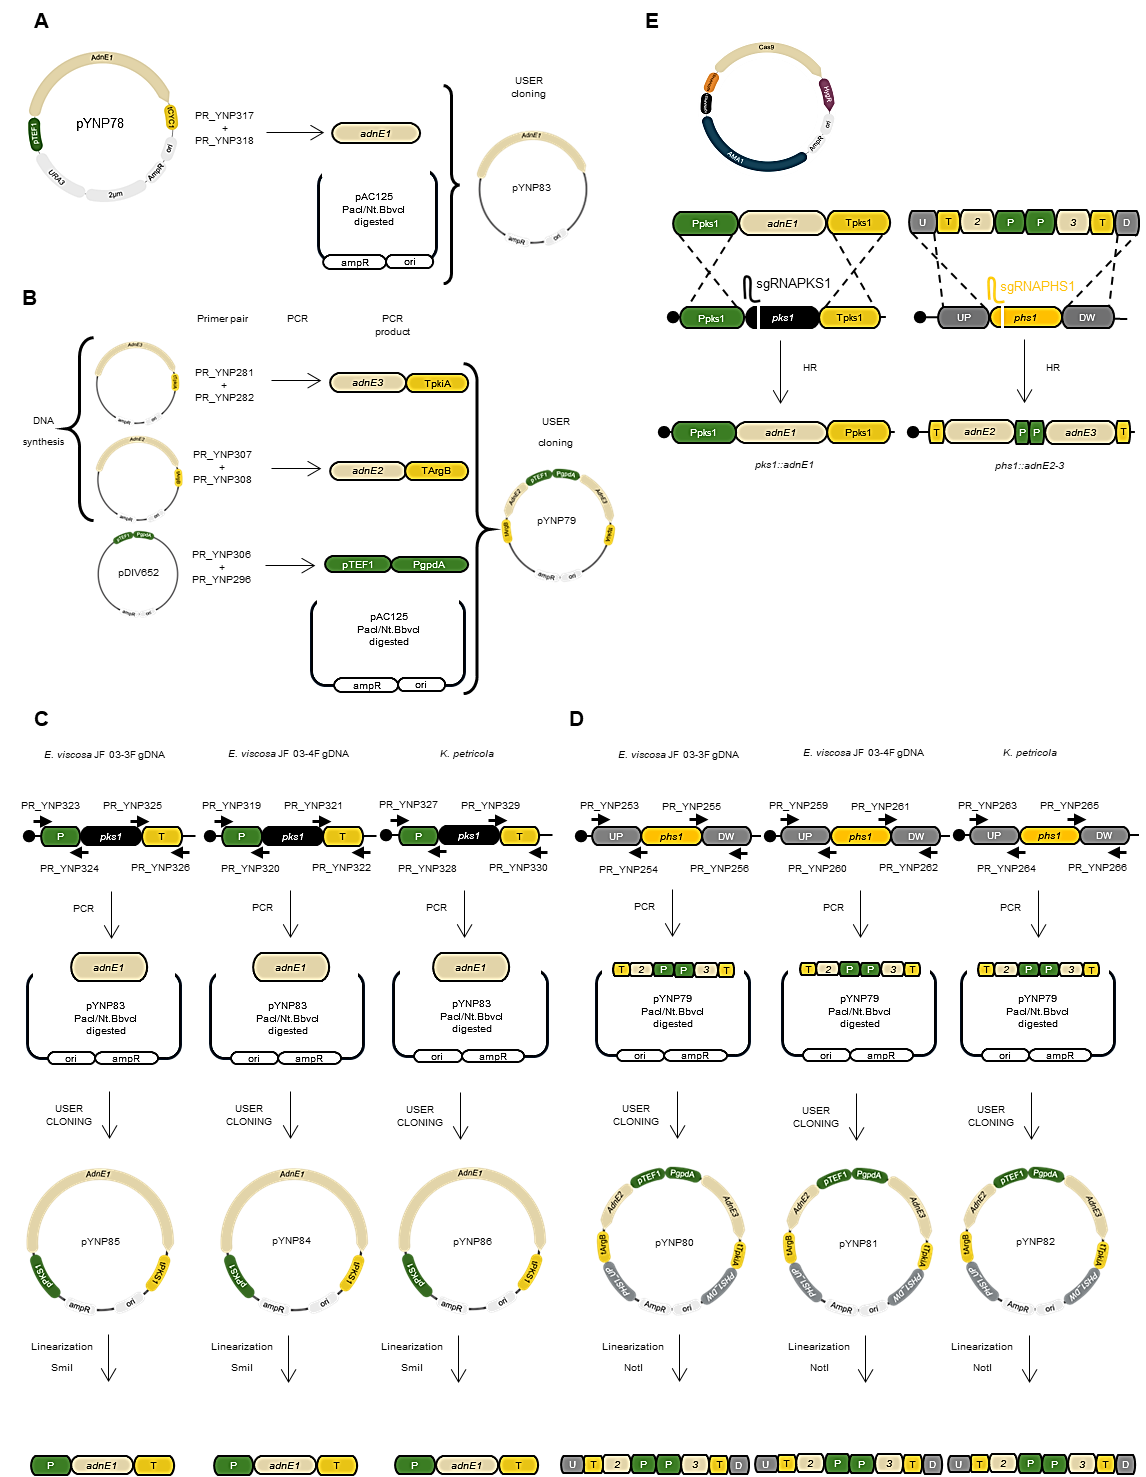
**

**Supplementary figure 14.** *adnE* assembly and heterologous expression in black yeastsPOP4. **A)** *adnE1* was PCR-amplified from pYNP78, resulting in plasmid pYNP83; **B)** *adnE2*-TArgBand *adnE3*-TpkiAwere amplified from synthesized plasmids. *A. nidulans* TEF1 and gpdA promoters were amplified from pDIV652. The PCR products were cloned into plasmid pAC125, resulting in plasmid pYNP79; **C)** 1Kb of *pks1* promoters and terminators were PCR-amplified from black yeasts genomic DNA and cloned into PacI/Nt.bbvcI digested plasmid pYNP83, resulting in plasmids pYNP84, pYNP85, pYNP86 expressing *adnE1* under the control of pks1 promoter and terminator; **D)** 1.5Kb upstream and downstream DNA sequences from *phs1* were PCR-amplified from black yeasts genomic DNA and cloned into PacI/Nt.bbvcI digested plasmid pYNP79, resulting in plasmids pYNP80, pYNP81, pYNP82 expressing *adnE2* and *adnE3* under the control of *A. nidulans* TEF1 and gpdA promoters, and argB and pkiA terminators, respectively; **E)** The constructed plasmids harboring *adnE* genes were linearized transformed into black yeasts together with Cas9-sgRNA plasmids and integrated into *pks1* and *phs1* loci. Image created with BioRender.com


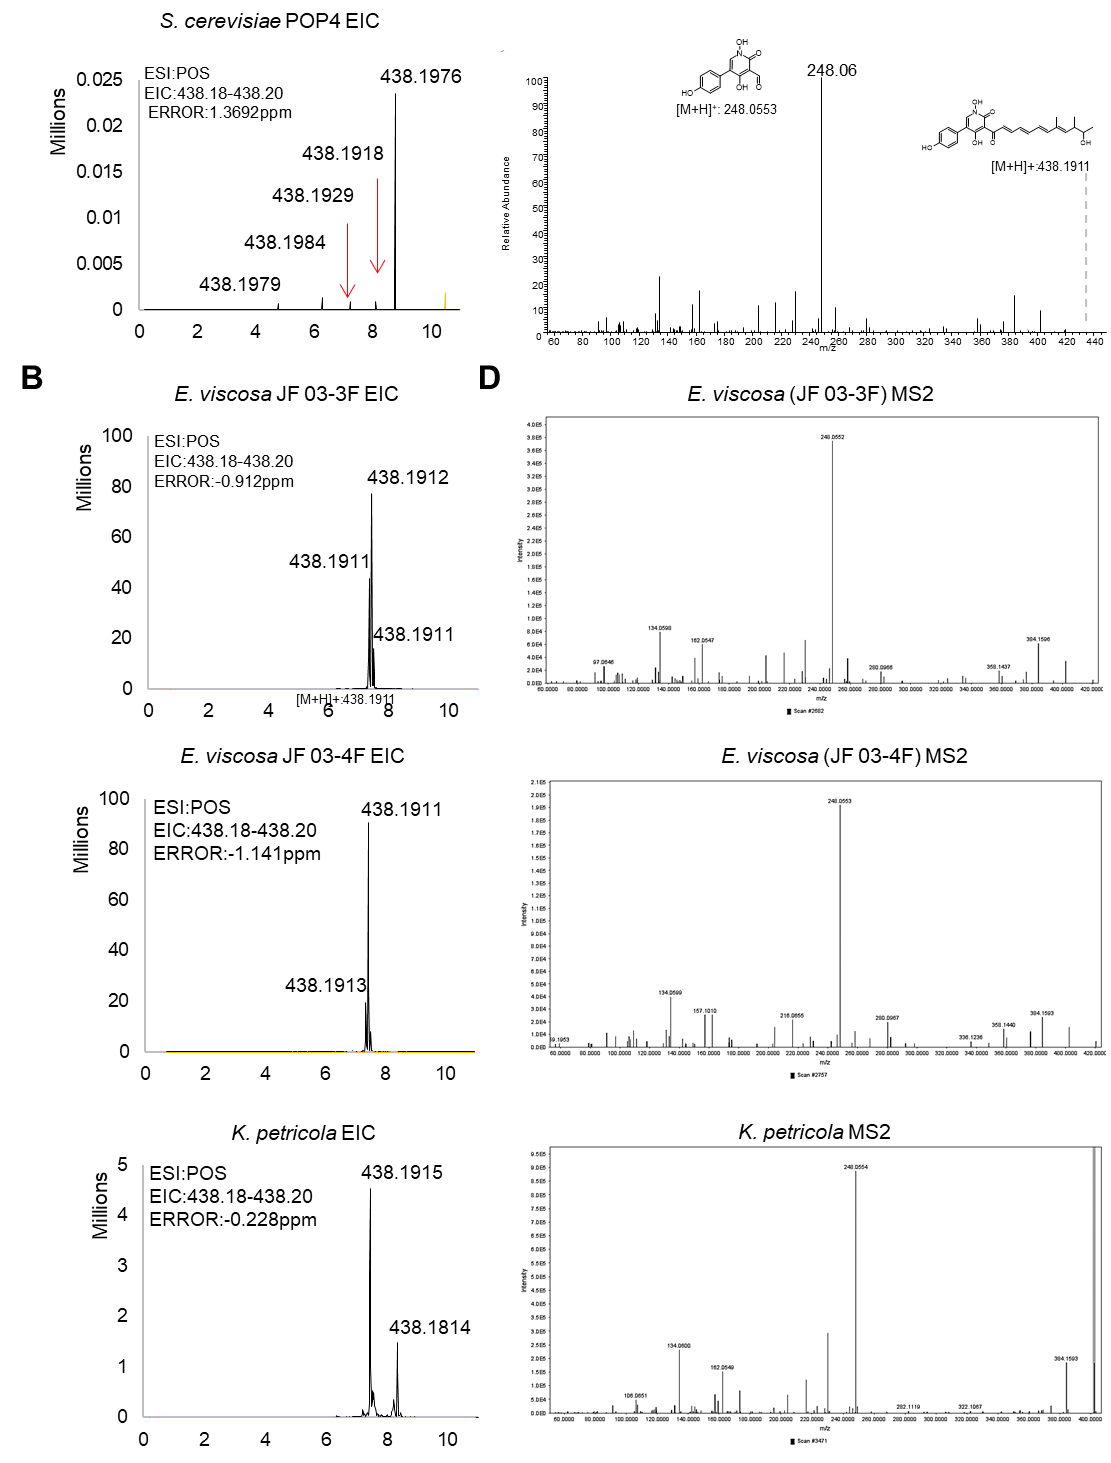


**Supplementary figure 15.** Extracted ion chromatograms and mass fragmentation spectra of YNP1 in different hosts. All chromatograms are displayed in positive mode. **A)** Extracted ion chromatogram for m/z 438.1917 calculated for [C25H27NO6]+ obtained from LC-MS analysis of *S. cerevisiae* POP4 extracts: targeted mass was found on noise levels;**B)** Extracted ion chromatograms and mass fragmentation during heterologous production of YNP1 in black yeasts: *m/z* 438.1912 was found in all strains; **C)** The mass fragmentation pattern found in black yeasts corresponded to a pyridine moiety and an unsaturated acyl chain.

**
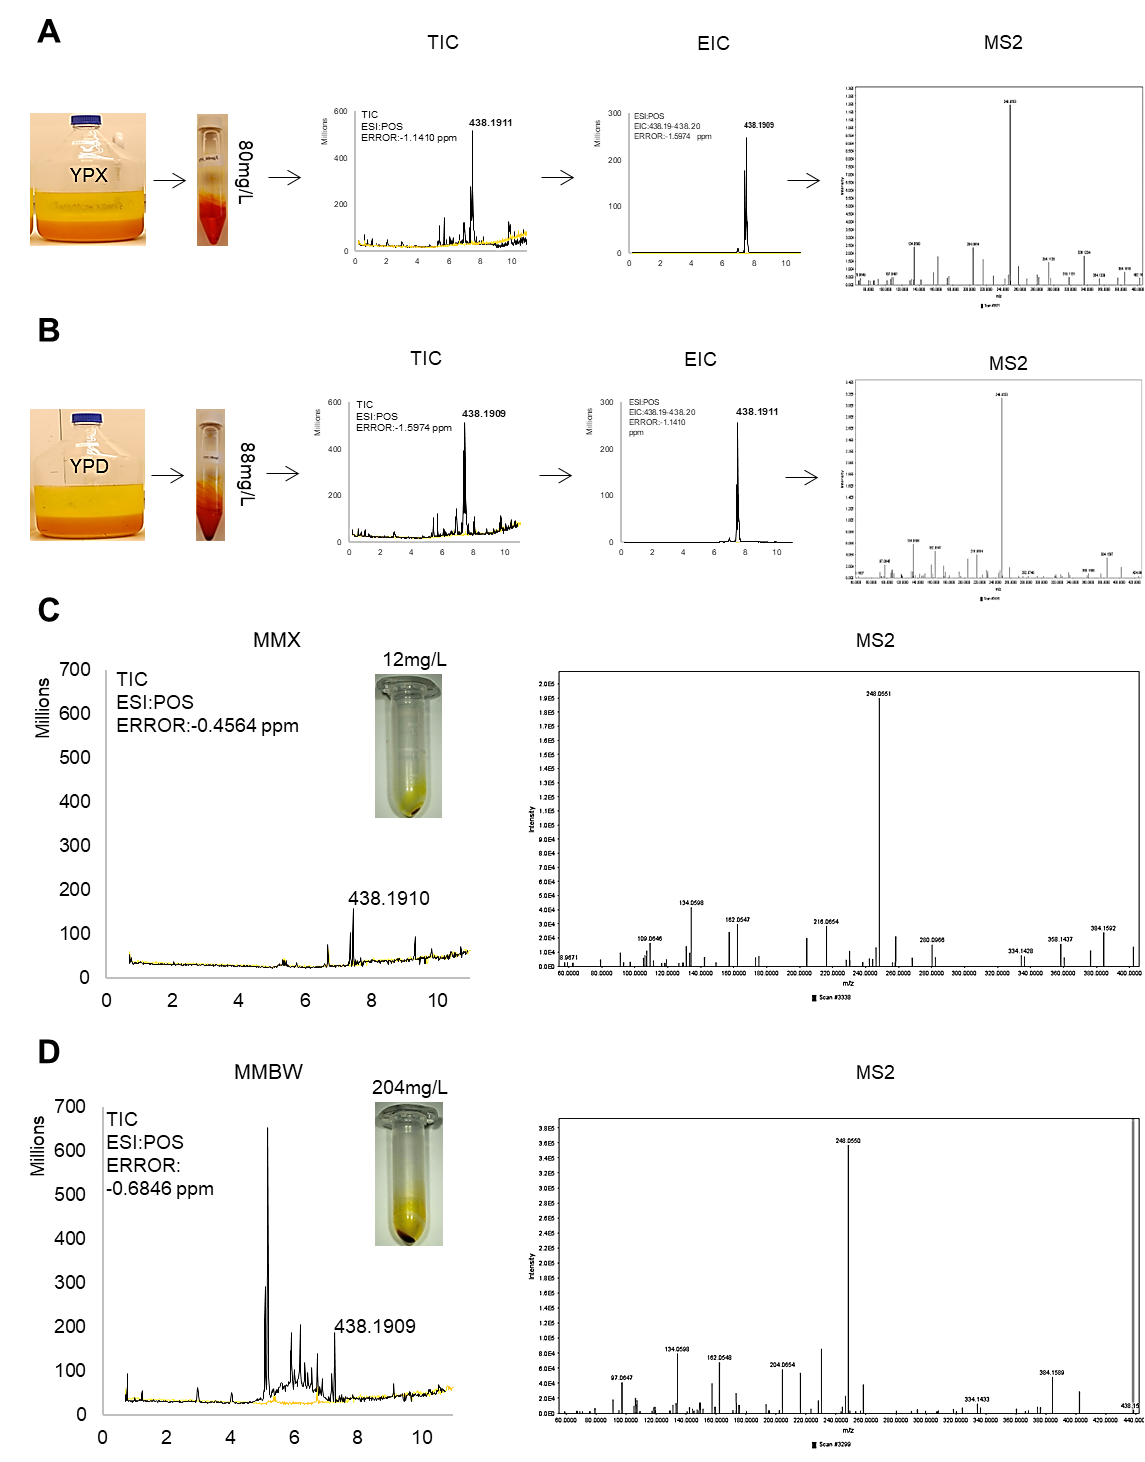
**

**Supplementary figure 16.** Production of YNP1in *E. viscosa* JF 03-4F different media. **A)** Process of extraction, chromatograms and mass fragmentation spectra during production of YNP1 in 1L of YPX media; **B)** Process of extraction, chromatograms and mass fragmentation spectrum during production of YNP1in 1L YPD media; **C)** Total ion chromatogram and mass fragmentation spectrum during production of YNP1in 50mL of MMX media; **D)** Total ion chromatogram and mass fragmentation spectrum during production of YNP1in 50mL of MMBW media.

**17-Hydroxyfarinosone**

Yellow solid; 1H (800 MHz, DMSO-d6,): δ = 17.64 (s, 1H, C4-*OH*), 11.64 (s, 1H, *N-OH*), 9.48 (s, 1H, C4´-*OH*), 8.01 (d, *J* = 15.2 Hz, 1H, H-8), 7.55 (s, 1H, H-6), 7.60 (m, 1H, H-9), 7.28 (d, *J* = 8.6 Hz, 2H, H-2´, H-6´), 6.78 (d, *J* = 8.6, 2H, H-3´, H-5´), 6.63 (dd, *J* = 11.7 Hz and 14.9 Hz, 1H, H-10), 6.95 (dd, *J* = 14.5, 1H, H-11), 6.45 (dd, *J* = 15.2 Hz and 11.0 Hz, 1H, H-12), 6.56 (d, *J* = 15.3 Hz 1H, H-13), 5.85 (s, 1H, H-15), 4.52 (d,1H, C-17-*OH*), 3.17 (m, 1H, H-16), 3.51 (m, 1H, H-17), 2.01 (s, 3H, H-20), 1.20 (s, 3H, H-19), 1.04 (d, 3H, H-18).

HRMS (ESI+) *m/z* calcd for [C25H27NO6]+438.1917; found 438.1915.

**Supplementary figure 17.** 1H-1H COSY and 1H-13C HMBC main correlations of 17-Hydroxylfarinosone.


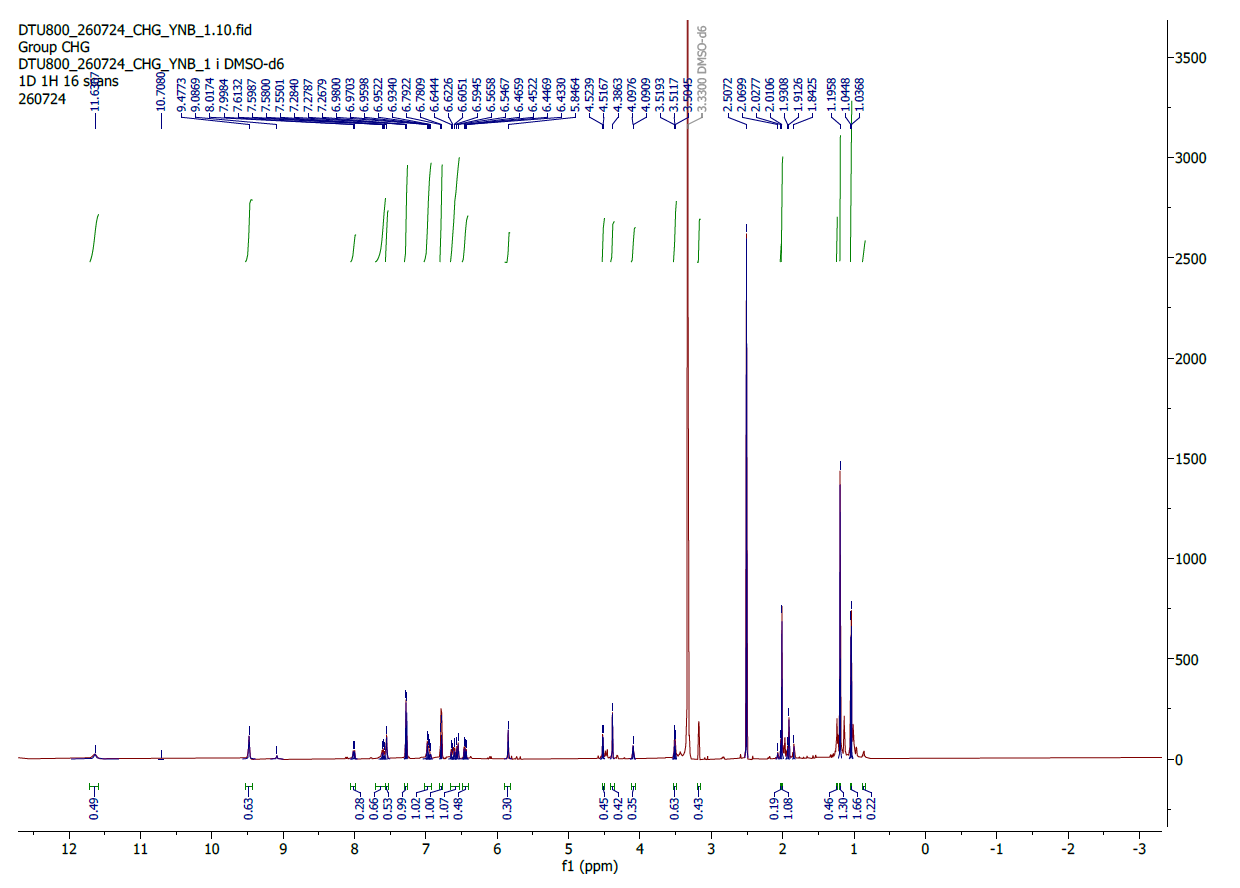


**Supplementary figure 18.** 1H NMR Spectra of 17-Hydroxylfarinosone (800 MHz, DMSO-d₆).


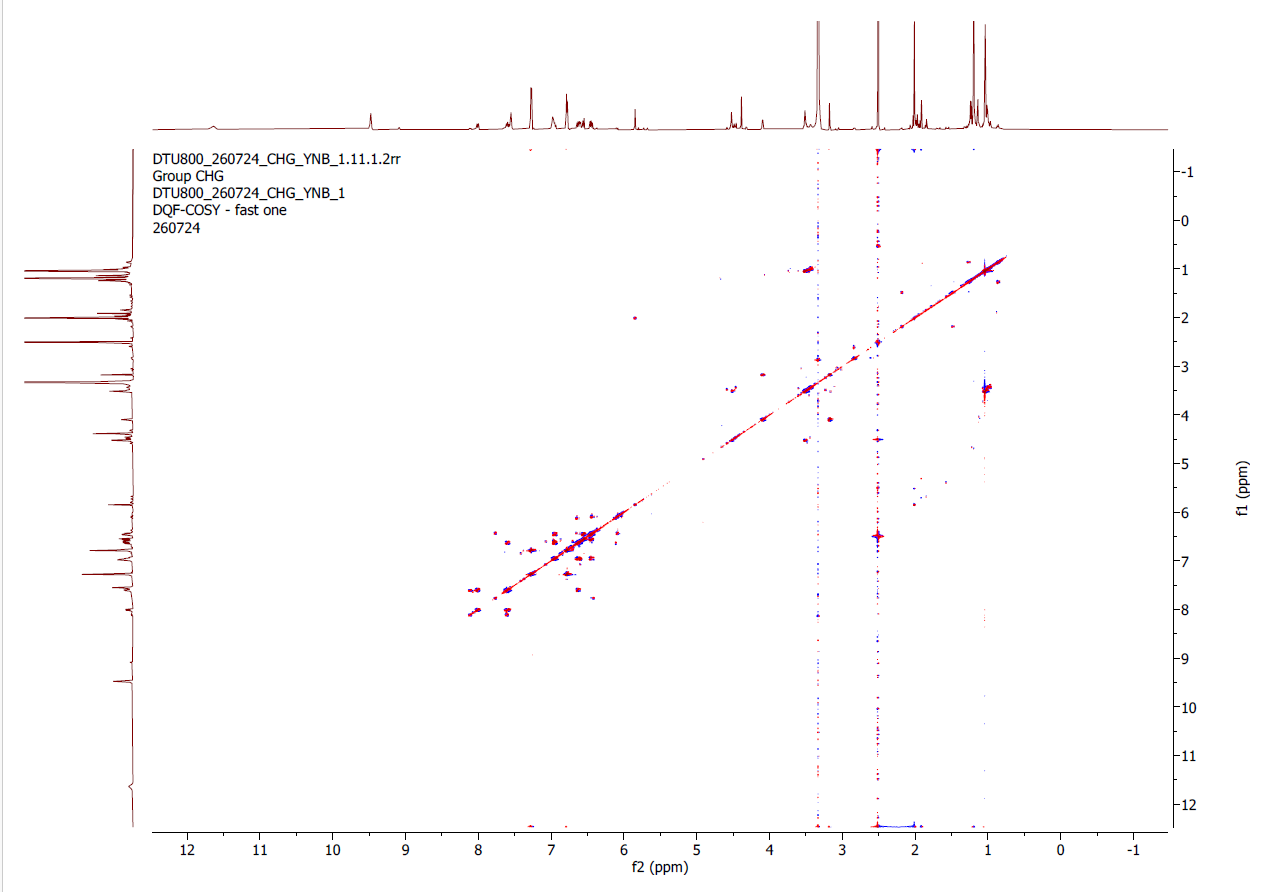


**Supplementary figure 19.** 1H-1H COSY NMR Spectrum of 17-Hydroxylfarinosone (800 MHz, DMSO-d₆).


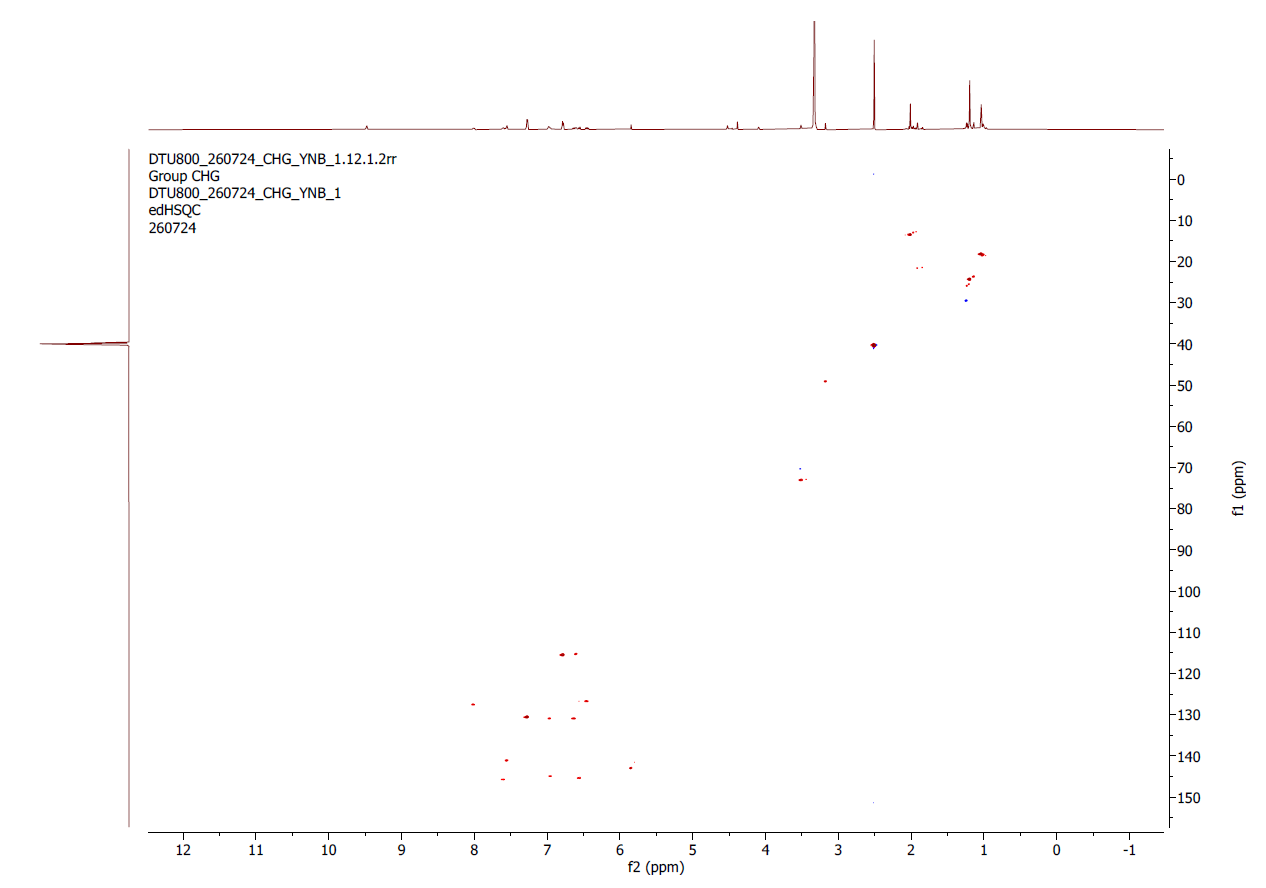


**Supplementary figure 20.** 1H-13C HSQC NMR Spectrum of 17-Hydroxylfarinosone (800 MHz, DMSO-d₆).


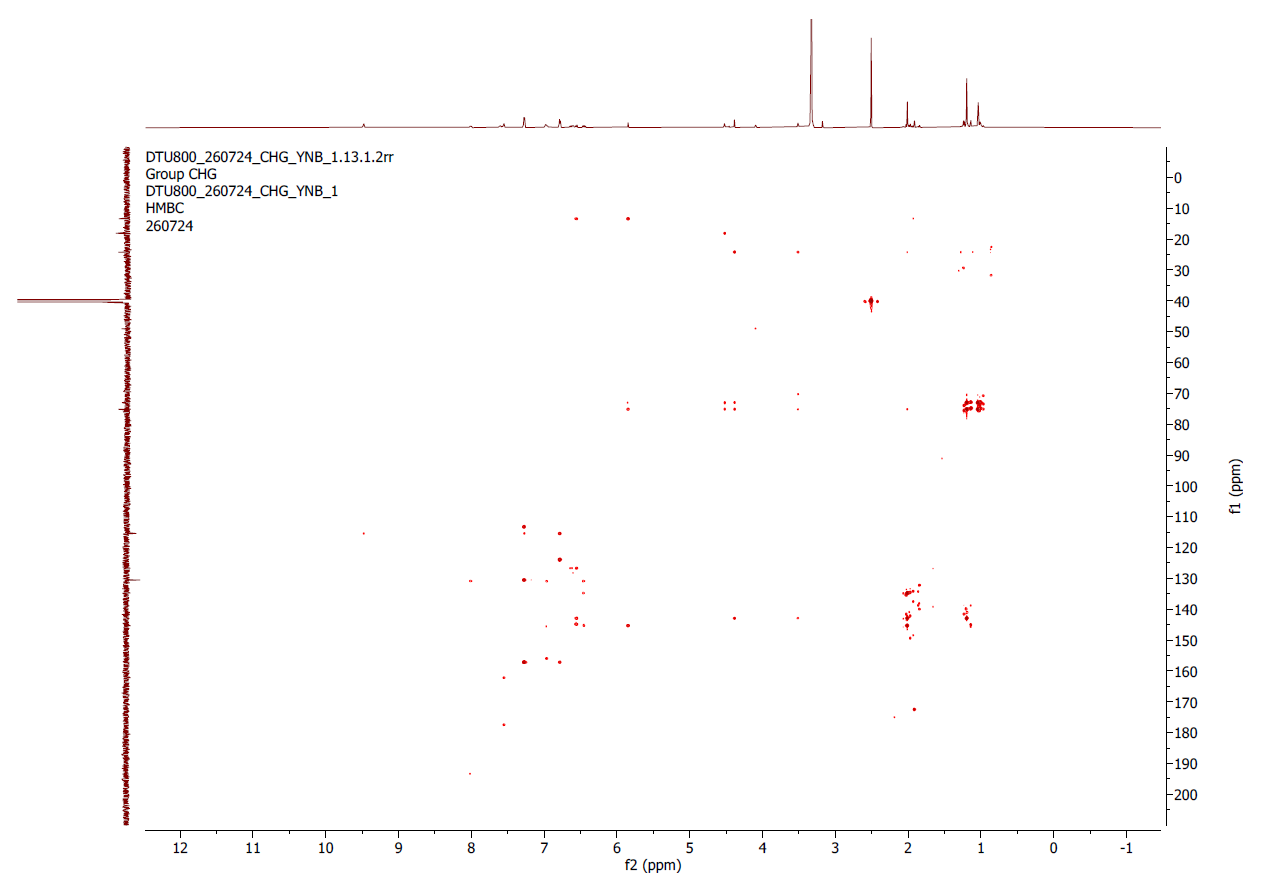


**Supplementary figure 21.** 1H-13C HMBC NMR Spectrum of 17-Hydroxylfarinosone (800 MHz, DMSO-d₆).

**
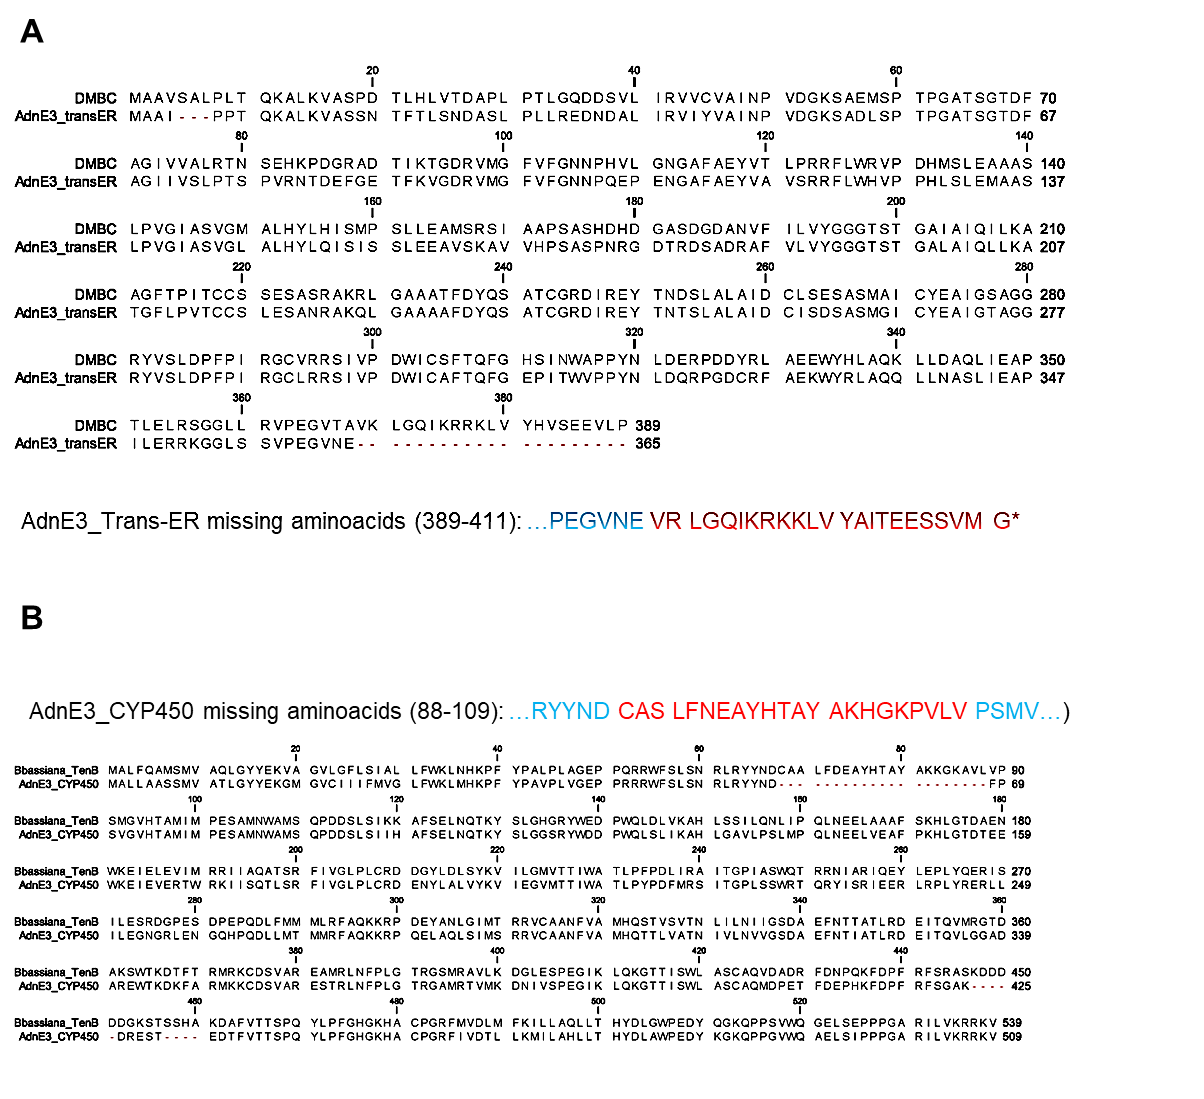
**

**Supplementary figure 22.** BLASTP of *adnE3* amino acid sequence. The retrieved amino acid sequences by gene calling is shown in blue. The missing amino acids found during BLASTp search are shown in red. **A)** Trans-ER domain aligned against *Beauveria* *bassiana* DMBC: the missing c-terminal amino acids found within *adnE3* reading frame are shown in red; **B)** CYP450 domain aligned against *B.* *bassiana* TenC: the missing amino acids found within *adnE3* reading frame are shown in red.

**
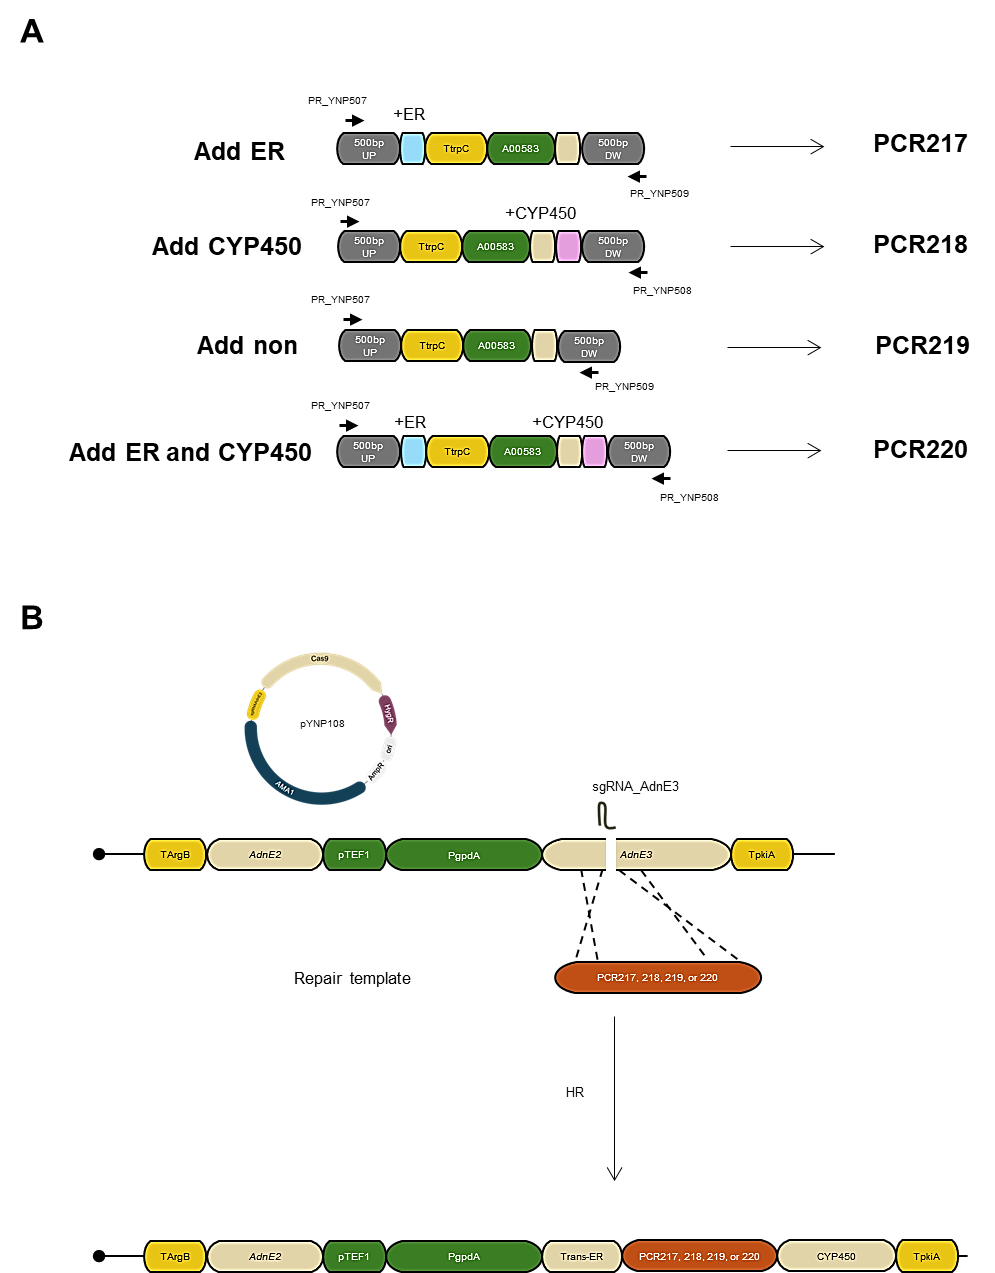
**

**Supplementary figure 23.** Introduction of missing DNA sequences within *adnE3* **A)** Different versions of the missing DNA sequences of the trans-ER and CYP450 domains in *adnE3* were synthesized and PCR-amplified: the added trans-ER sequence is marked in blue and the missing CYP450 sequence in pink; **B)** PCRs containing one, non, or both Trans-ER and CYP450 missing DNA sequences were transformed into *E. viscosa* JF 03-4F YNP1 producer strain together with Cas9-sgRNA plasmid pYNP108 targeting the connecting DNA sequence between Trans-ER and CYP450 domains and integrated by homologous recombination. Image created with BioRender.com

**
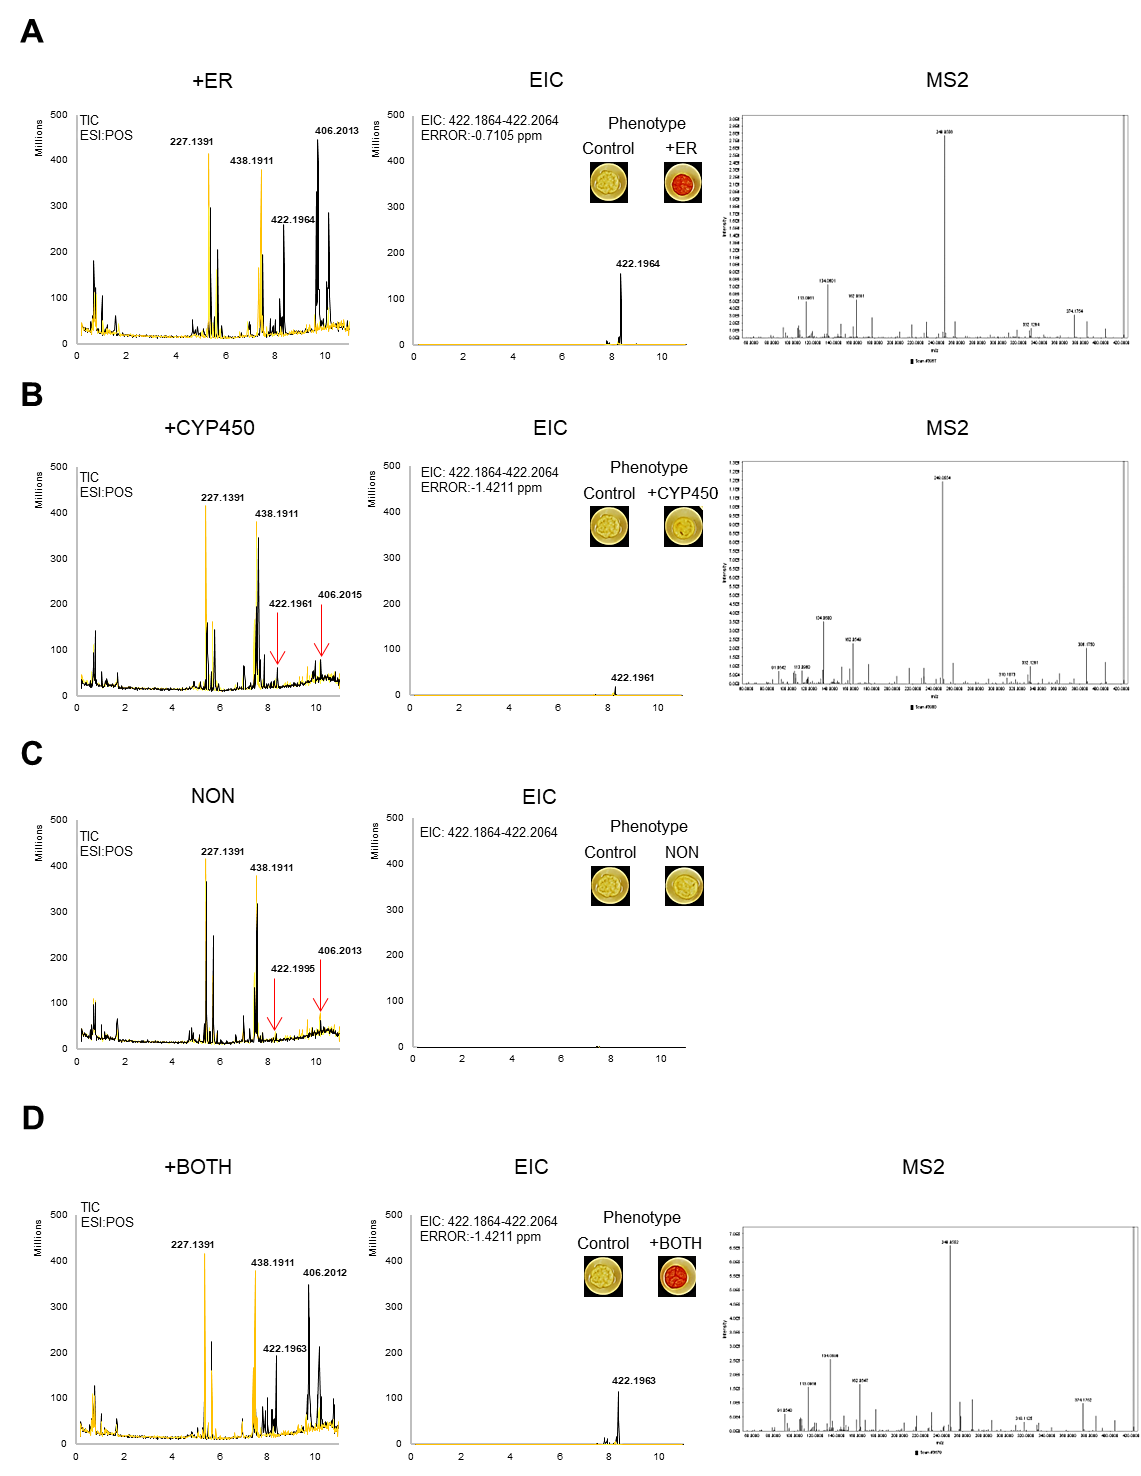
**

**Supplementary figure 24.** Introduction of missing DNA sequences within *adnE3* **A)** Introduction of the missing trans-ER sequence results in the appearance of two abundant peaks *m/z* 422.1964 (farinosone B) and 406.2015 (farinosone A), although *m/z* 438.1911 (YNP1) is produced in with less abundance; **B)** Introduction of the missing CYP450 sequence results in similar peaks compared to the parental strain; **C)** By not introducing any of the missing sequences result in similar peaks compared to the parental strain; **D)** Introduction of the missing trans-ER sequence results in the appearance of two abundant peaks *m/z* 422.1927 (farinosone B) and 406.2015 (farinosone A), and *m/z* 438.1911 (YNP1) is produced in very low abundance.

**
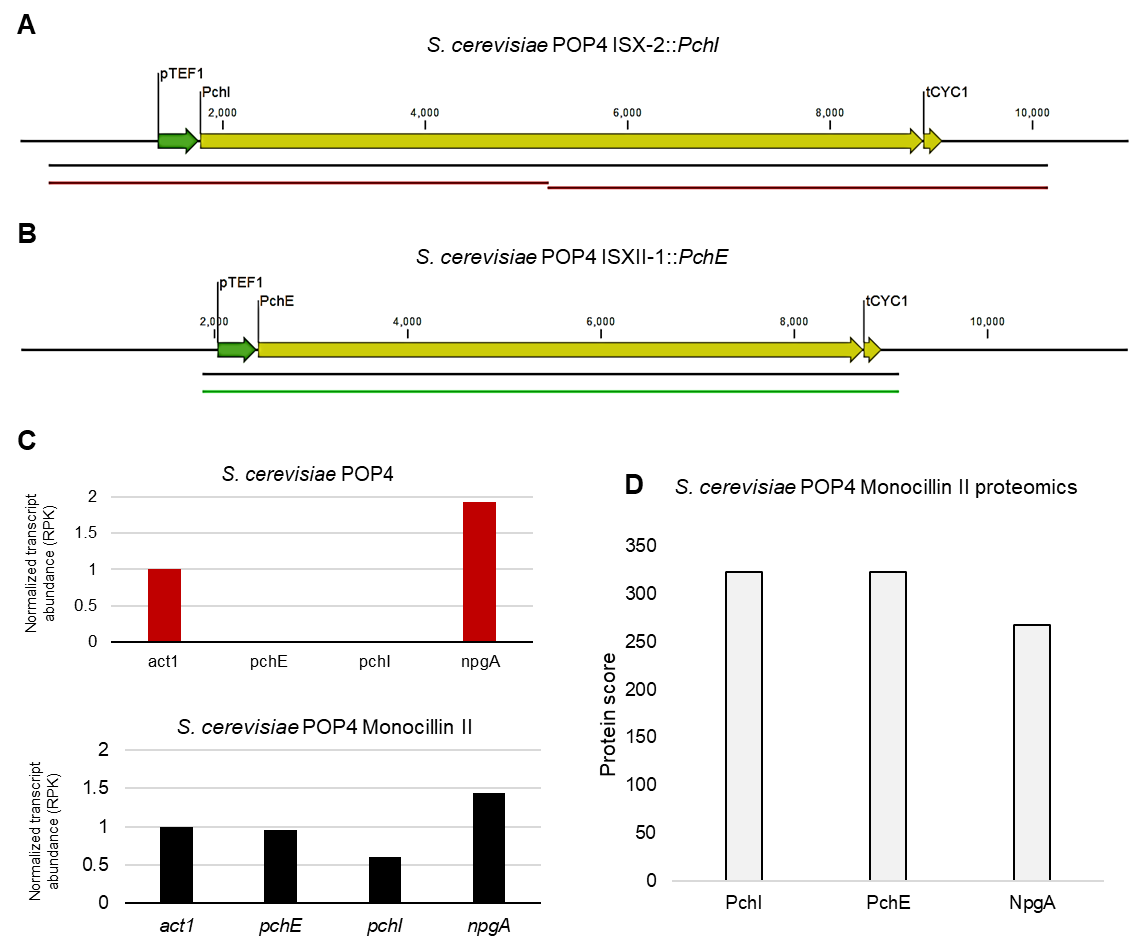
**

**Supplementary figure 25.** Monocillin II omics analysis in *S. cerevisiae* POP4. **A)** Genome sequencing results confirmed the integrity of *pchI* chromosomal integration in *S. cerevisiae* POP4; **B)** Genome sequencing results confirmed the integrity of *pchE* chromosomal integration in *S. cerevisiae* POP4; **C)** Transcriptomics results confirmed the expression of *pchI, pchE,* and *npgA* transcripts. The RNA-seq reads were mapped to the refence coding sequences, the number of mapped reads divided by the gene length to obtain reads per kilobase values, then these values were normalized to the RPK value of *act1* a housekeeping gene. **D)** Proteomics results confirmed the presence of PchI*,* PchE*,* and NpgA

**
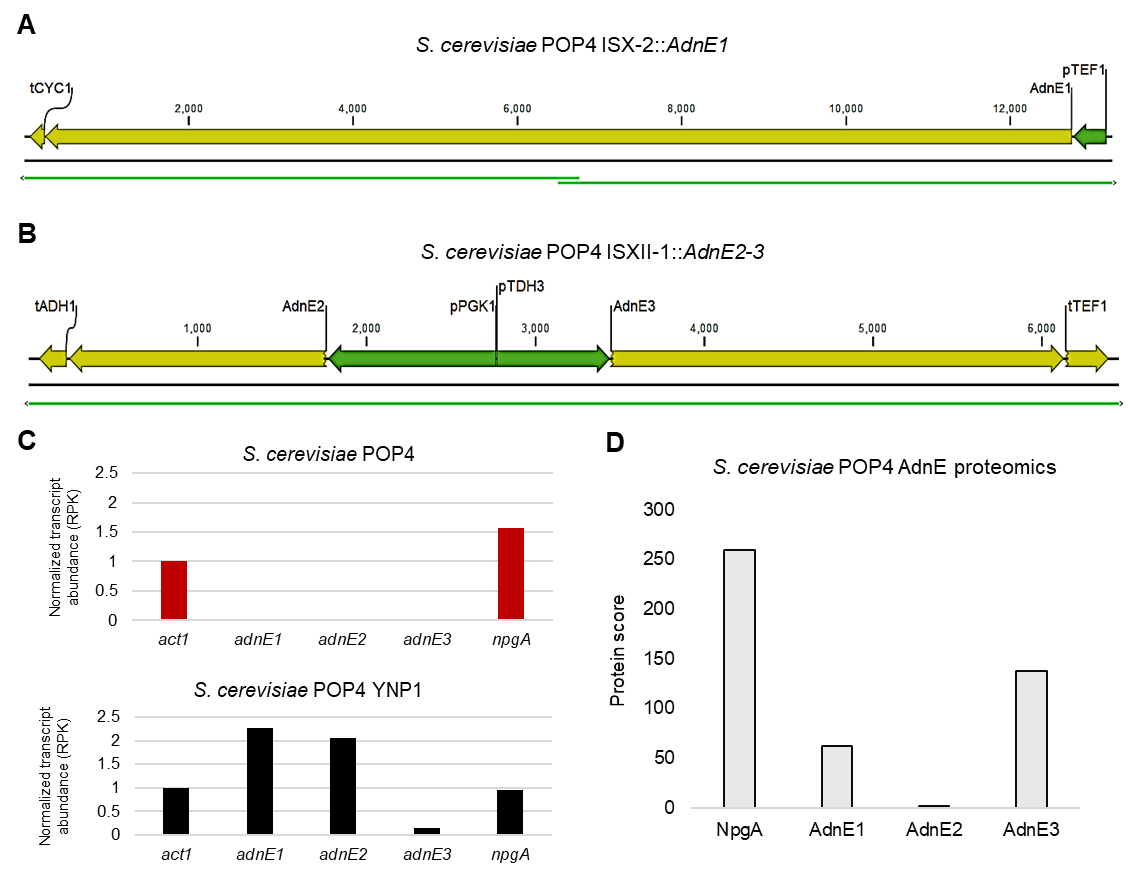
**

**Supplementary figure 26** Omics analyses of *adnE* genes expression in *S. cerevisiae* POP4. **A)** Genome sequencing results confirmed the sequence integrity of *adnE1* chromosomal integration in *S. cerevisiae* POP4; **B)** Genome sequencing results confirmed the sequence integrity of *adnE2-3* chromosomal integration in *S. cerevisiae* POP4; **C)** Transcriptomics results confirmed the expression of *adnE1-2-3* and *npgA* transcripts; The RNA-seq reads were mapped to the refence coding sequences, the number of mapped reads divided by the gene length to obtain reads per kilobase values, then these values were normalized to the RPK value of *act1* a housekeeping gene. **D)** Proteomics results confirmed the presence of AdnE1-2-3and NpgA.

**
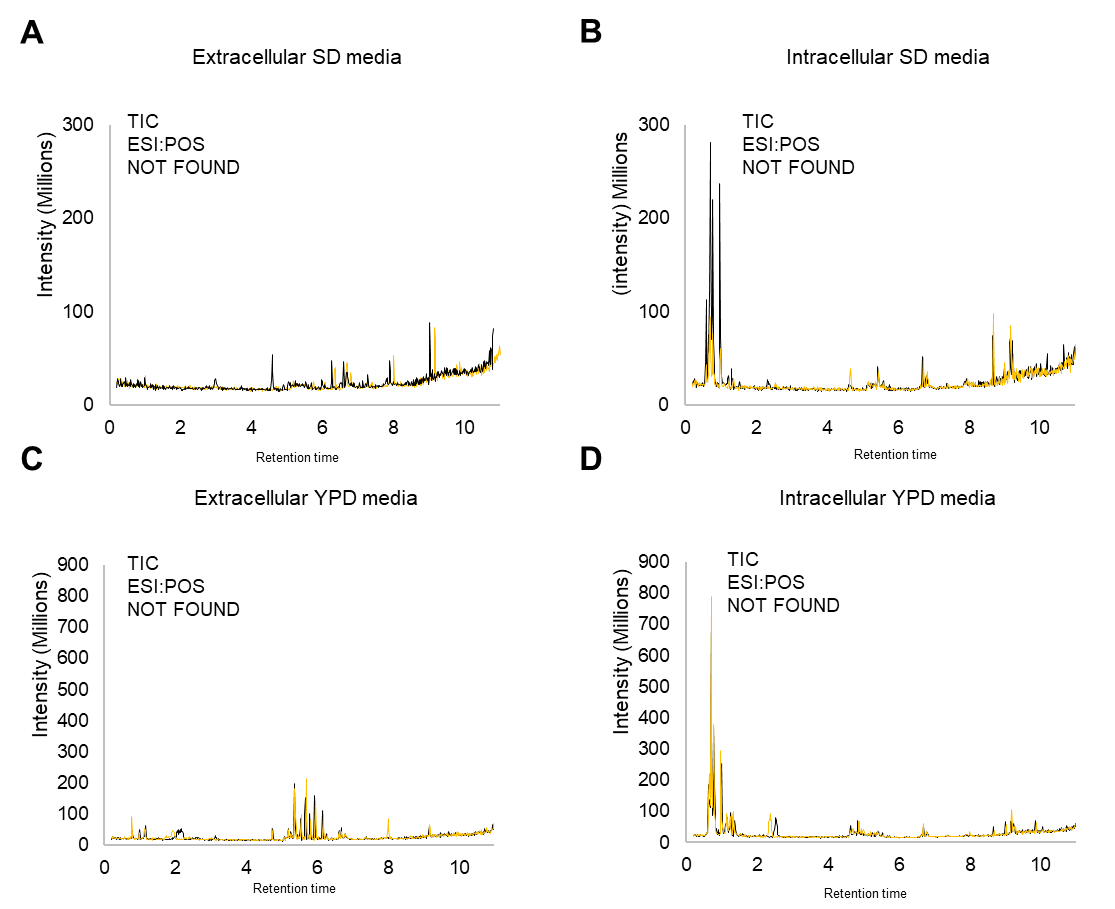
**

**Supplementary figure 27.** Plasmid-based expression of *adnE1* in *S. cerevisiae* POP4. **A)** Total ion chromatogram of extracellular phase in synthetic defined media (-ura) (genomic integration of *adnE1-2-3*, and *adnE1* in a 2µ plasmid); **B)** Total ion chromatogram obtained from LC-MS analysis of the intracellular extract after cultivation in synthetic dropout media (-ura) (genomic integration of *adnE1-2-3*, and *adnE1* in a 2µ plasmid); **C)** Total ion chromatogram obtained from LC-MS analysis of the extracellular phase after cultivation in YPD (genomic integration of *adnE1-2-3*); **D)** Total ion chromatogram obtained from LC-MS analysis of the intracellular phase in YPD (genomic integration of *adnE1-2-3*).

**
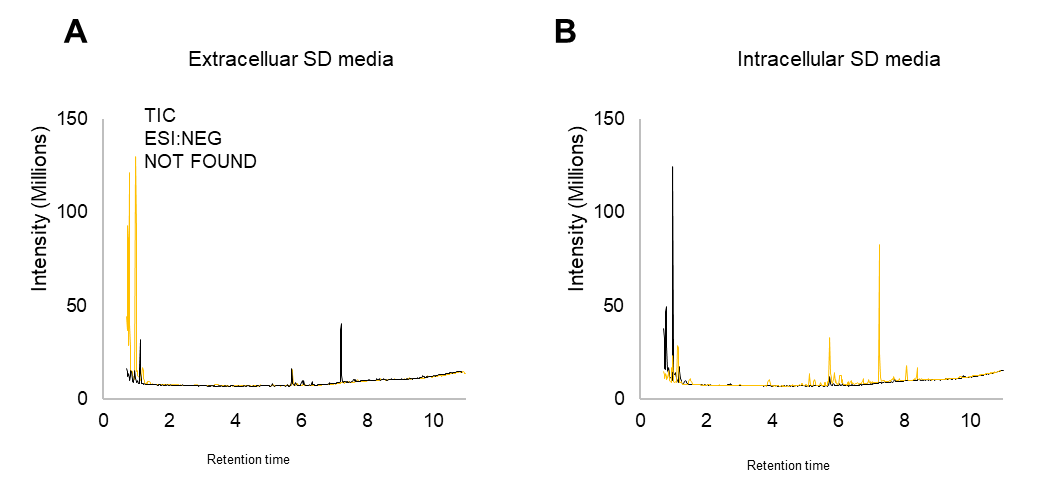
**

**Supplementary figure 28.** Plasmid-based expression of *adnE1* in *S. cerevisiae* BJ-5464-NpgA. **A)** Total ion chromatogram obtained from LC-MS analysis of extracellular phase after cultivation in synthetic dropout media (-ura); **B)** Total ion chromatogram obtained from the LC-MS analysis of the intracellular phase after cultivation in dropout media (-ura).

**
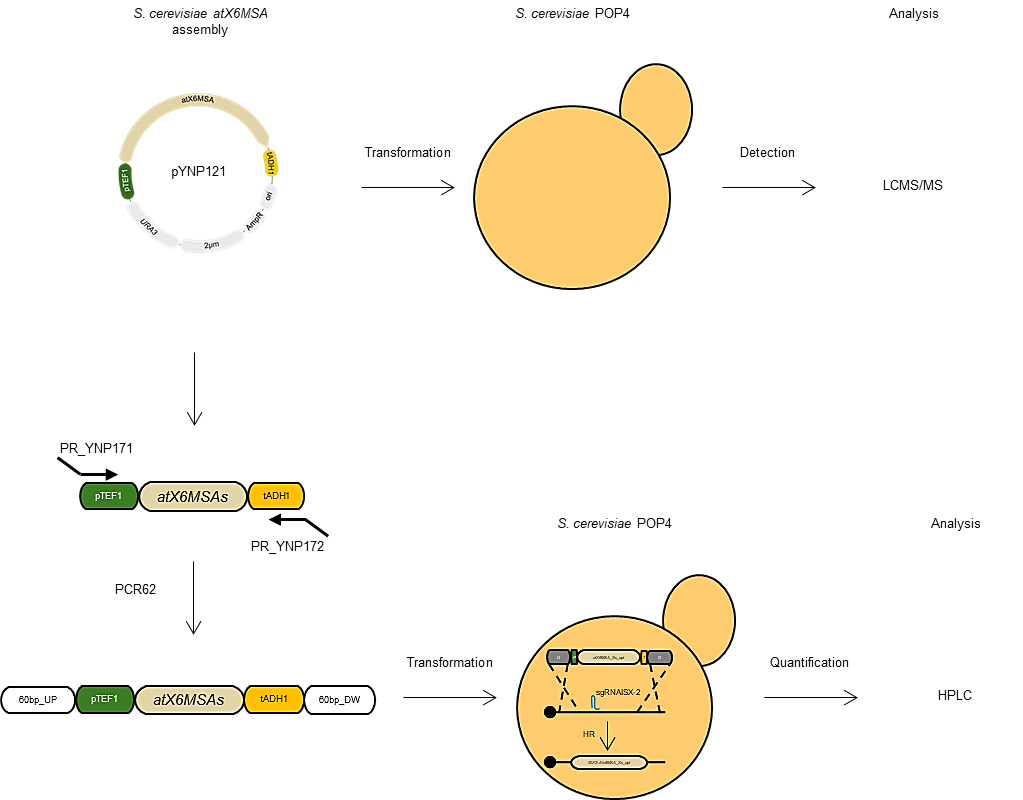
**

**Supplementary figure 29.** Assembly and heterologous production of 6-MSA in *S. cerevisiae* POP4. **A)** For 6-MSA detection, a *S. cerevisiae* codon optimized version of *atX6MSA* was expressed using a 2µ plasmid (pYNP121). **B)** for 6-MSA quantification, an *atX6MSA* was amplified from pYNP121 using a primer pair containing 60bp homologous sequences to *S. cerevisiae* ISX-2 and integrated into *S. cerevisiae* genome using a Cas-sgRNA plasmid targeting ISX-2 and integrated by homologous recombination. Image created with BioRender.com

**
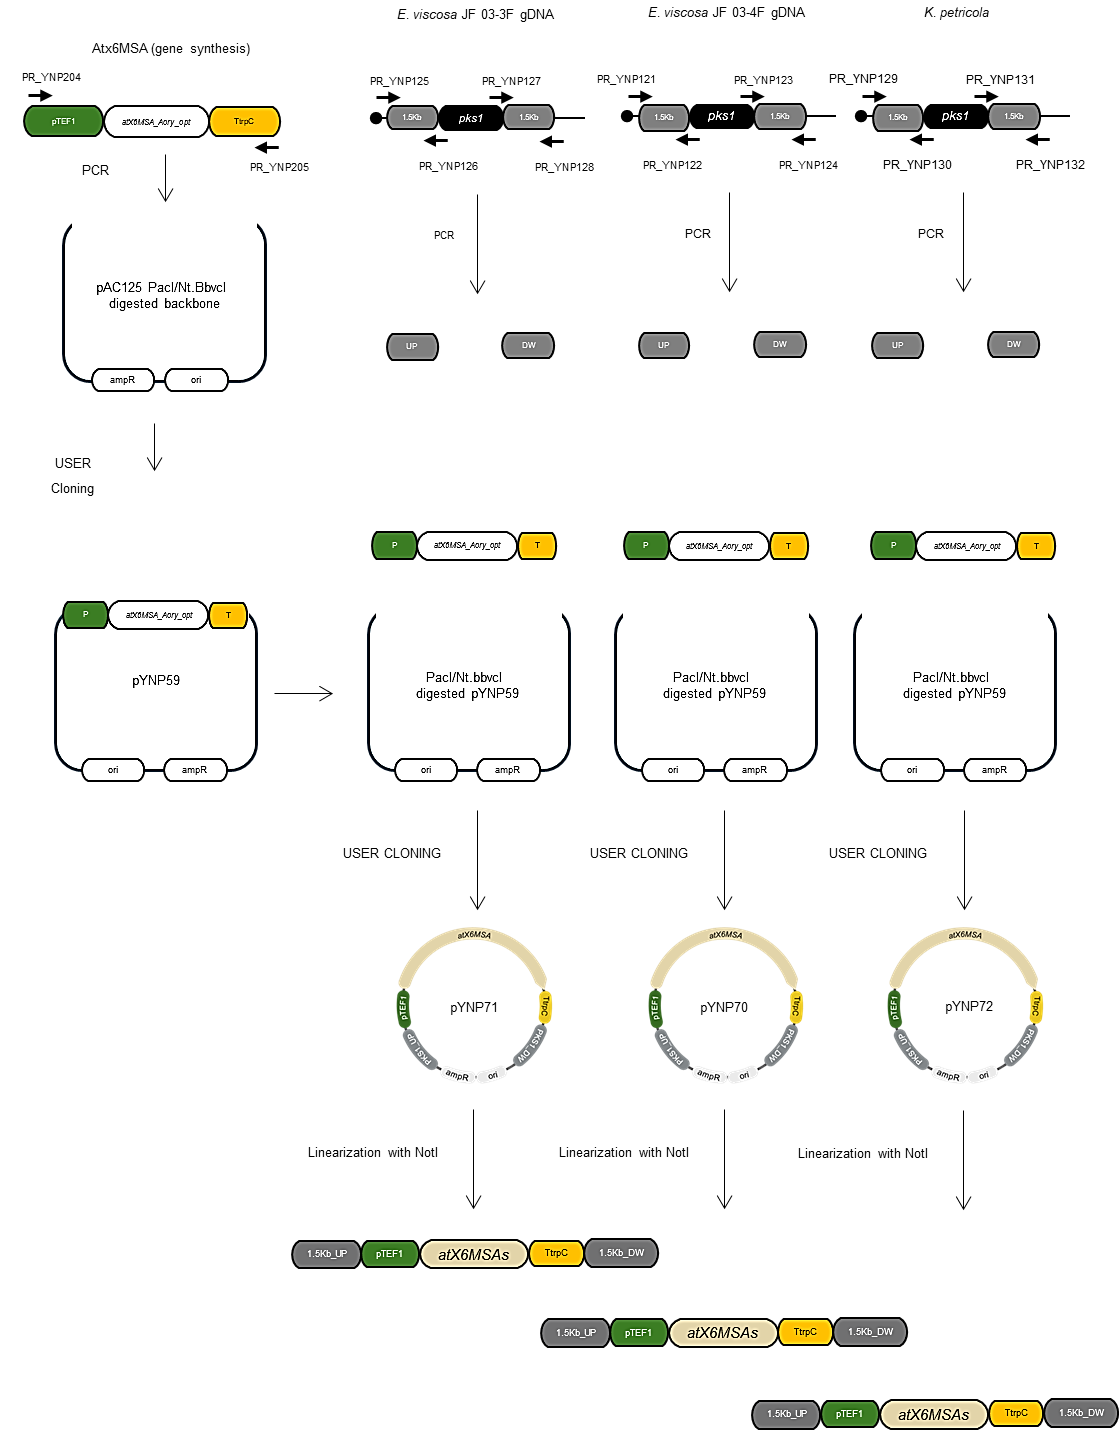
**

**Supplementary figure 30.** Assembly and heterologous production of 6-MSA in black yeasts. An *A. oryzae* codon optimized version of *atx6MSA* was cloned, resulting in pYNP59 expressing *atX6MSA* under the control of *A. nidulans* TEF1promoter and trpCterminator. pYNP59 was prepared for another round of cloning and the upstream and downstream DNA sequences from *pks1* genes were cloned, resulting in plasmid pYNP70, pYNP71, pYNP72. Plasmids were linearized with NotI and linearized fragments were used during transformations. Image created with BioRender.com

**Supplementary table 1.** PKS abundance per class across the fungal kingdom. The PKS counts were done using the data available in supplementary file 1 containing the information regarding the genomes, PKS repertoire, and domain organization per PKS used to calculate the values in this table.

| Class | PKS | Genomes | Average PKS per genome |
| --- | --- | --- | --- |
| Dothidiomycetes | 2885 | 238 | 12.12185 |
| Eurotiomycetes | 5386 | 253 | 21.28854 |
| Lecanoromycetes | 656 | 30 | 21.86667 |
| Leotiomycetes | 874 | 60 | 14.56667 |
| Orbiliomycetes | 159 | 32 | 4.96875 |
| Pezizomycetes | 27 | 16 | 1.6875 |
| Sordariomycetes | 4485 | 227 | 19.75771 |
| Saccharomycetes | **5** | **660** | **0.007576** |
| Schizosaccharomycetes | 0 | 11 | 0 |
| Ustilaginomycetes | 68 | 59 | 1.152542 |
| Microbotryomycetes | 0 | 49 | 0 |
| Agaricomycetes | 309 | 139 | 2.223022 |
| Tremellomycetes | 0 | 157 | 0 |
| Mucoromycetes | 0 | 26 | 0 |
| Chytridiomycetes | 1 | 8 | 0.125 |

**Supplementary table 2.** Annotated biosynthetic repertoire of *S. cerevisiae* S288C

| **Region** | **Type** | **From** | **To** | **Known or predicted product** | **Comment** |
| --- | --- | --- | --- | --- | --- |
| [Region 2.1](file:///C:\Users\aeglo\AppData\Local\Microsoft\Windows\INetCache\Content.MSO\9DCD713E.xlsx#RANGE!r2c1) | [NRPS-like](https://docs.antismash.secondarymetabolites.org/glossary/#nrps-like) | 449,748 | 493,926 | Alpha aminoadipate reductase |  |
| [Region 2.2](file:///C:\Users\aeglo\AppData\Local\Microsoft\Windows\INetCache\Content.MSO\9DCD713E.xlsx#RANGE!r2c2) | [betalactone](https://docs.antismash.secondarymetabolites.org/glossary/#betalactone) | 648,707 | 678,351 | none |  |
| [Region 8.1](file:///C:\Users\aeglo\AppData\Local\Microsoft\Windows\INetCache\Content.MSO\9DCD713E.xlsx#RANGE!r8c1) | [terpene](https://docs.antismash.secondarymetabolites.org/glossary/#terpene) | 474,845 | 496,179 | none |  |

**Supplementary table 3.** Annotated biosynthetic repertoire of *A. oryzae* RIB40

| **Region** | **Type** | **From** | **To** | **Known or predicted product** | **Comment** |
| --- | --- | --- | --- | --- | --- |
| Region 1.1 | NRPS-like | 73,520 | 117,330 | none |  |
| Region 1.2 | T1PKS | 124,128 | 172,243 | none |  |
| Region 1.3 | T1PKS | 181,612 | 230,673 | none |  |
| Region 1.4 | T1PKS | 331,024 | 379,315 | none |  |
| Region 1.5 | T3PKS | 2,263,763 | 2,305,294 | none |  |
| Region 1.6 | betalactone | 3,156,943 | 3,192,763 | none |  |
| Region 1.7 | indole | 3,555,717 | 3,577,076 | none |  |
| Region 1.8 | NRPS | 3,744,319 | 3,792,098 | none |  |
| Region 1.9 | T1PKS,NRPS-like | 3,830,161 | 3,908,629 | asparasone A |  |
| Region 1.10 | T1PKS | 4,255,163 | 4,307,775 | none |  |
| Region 1.11 | NRPS-like | 4,585,612 | 4,636,376 | choline |  |
| Region 1.12 | fungal-RiPP-like | 5,655,521 | 5,716,610 | none |  |
| Region 2.1 | NRPS,NRPS-like | 1 | 45,587 | imizoquin A-D/TMC-2A-2B |  |
| Region 2.2 | NRPS | 72,485 | 117,267 | aspirochlorine |  |
| Region 2.3 | terpene,NRPS,T1PKS | 611,200 | 757,136 | leporin B |  |
| Region 2.4 | T1PKS | 981,844 | 1,029,715 | none |  |
| Region 2.5 | T1PKS,NRPS-like | 1,274,209 | 1,366,811 | none |  |
| Region 2.6 | fungal-RiPP-like | 1,593,683 | 1,655,400 | none |  |
| Region 2.7 | NRPS-like | 4,634,855 | 4,677,890 | none |  |
| Region 2.8 | NRPS | 5,056,199 | 5,100,650 | none |  |
| Region 2.9 | NRPS-like | 6,202,300 | 6,245,365 | aspergillic acid |  |
| Region 3.1 | fungal-RiPP-like | 1 | 99,339 | none |  |
| Region 3.2 | terpene | 177,444 | 198,579 | none |  |
| Region 3.3 | NRPS-like | 198,910 | 242,235 | none |  |
| Region 3.4 | NI-siderophore | 737,036 | 768,807 | none |  |
| Region 3.5 | T1PKS | 1,108,364 | 1,153,810 | aflavarin |  |
| Region 3.6 | NRPS | 1,366,059 | 1,420,399 | Ferricrocin-like |  |
| Region 3.7 | T1PKS | 2,271,904 | 2,318,926 | none |  |
| Region 3.8 | NRPS | 3,469,600 | 3,513,616 | astellolide A |  |
| Region 3.9 | NRPS,terpene | 4,018,632 | 4,061,847 | flavunoidine |  |
| Region 3.10 | fungal-RiPP-like | 4,214,296 | 4,276,503 | none |  |
| Region 3.11 | T1PKS | 4,676,911 | 4,726,797 | none |  |
| Region 3.12 | T1PKS,indole | 5,072,130 | 5,123,684 | Aflatoxin (inactive) | Inactive |
| Region 4.1 | NRPS-like | 1,301,389 | 1,344,742 | none |  |
| Region 4.2 | terpene | 1,445,541 | 1,466,775 | none |  |
| Region 4.3 | terpene | 2,867,141 | 2,889,545 | none |  |
| Region 4.4 | T1PKS | 3,017,795 | 3,064,445 | YWA1 |  |
| Region 4.5 | NRPS | 3,244,838 | 3,294,071 | (-)-ditryptophenaline |  |
| Region 4.6 | NRPS | 3,586,918 | 3,643,241 | none |  |
| Region 4.7 | indole | 3,660,508 | 3,681,848 | none |  |
| Region 4.8 | fungal-RiPP-like | 3,690,917 | 3,751,871 | none |  |
| Region 4.9 | T1PKS | 4,088,475 | 4,135,764 | 2,4'-dihydroxy-3'-methoxypropiophenone |  |
| Region 4.10 | terpene | 4,166,314 | 4,190,918 | none |  |
| Region 5.1 | fungal-RiPP-like | 65,571 | 132,685 | none |  |
| Region 5.2 | T1PKS | 163,924 | 227,433 | none |  |
| Region 5.3 | terpene | 279,032 | 300,671 | none |  |
| Region 5.4 | indole | 764,849 | 786,289 | none |  |
| Region 5.5 | T3PKS | 835,662 | 879,901 | none |  |
| Region 5.6 | T1PKS | 928,435 | 974,509 | dichlorodiaporthin |  |
| Region 5.7 | T3PKS | 2,565,021 | 2,606,344 | none |  |
| Region 5.8 | NRPS,indole | 2,722,501 | 2,768,479 | none |  |
| Region 5.9 | terpene | 2,818,017 | 2,840,970 | none |  |
| Region 5.10 | fungal-RiPP | 4,089,079 | 4,129,971 | ustiloxin B |  |
| Region 5.11 | terpene | 4,431,365 | 4,454,401 | none |  |
| Region 5.12 | T1PKS | 4,507,251 | 4,533,889 | pyranoviolin A |  |
| Region 6.1 | indole | 462,192 | 483,509 | none |  |
| Region 6.2 | fungal-RiPP-like | 485,056 | 546,088 | none |  |
| Region 6.3 | NRPS | 858,835 | 910,798 | none |  |
| Region 6.4 | NRPS-like | 1,195,158 | 1,238,286 | actinopolymorphol |  |
| Region 6.5 | terpene,T1PKS | 1,320,623 | 1,387,169 | none |  |
| Region 6.6 | isocyanide,terpene | 1,403,884 | 1,446,006 | none |  |
| Region 6.7 | NRPS-like,NRPS | 2,146,226 | 2,213,034 | beta-lactam |  |
| Region 6.8 | T3PKS | 2,340,986 | 2,384,039 | none |  |
| Region 6.9 | NRPS | 2,612,286 | 2,668,300 | nidulanin A |  |
| Region 6.10 | T1PKS | 3,082,284 | 3,130,623 | none |  |
| Region 6.11 | NRPS-like | 3,274,048 | 3,316,510 | none |  |
| Region 6.12 | terpene,T1PKS | 3,406,480 | 3,475,492 | none |  |
| Region 7.1 | T1PKS | 13,990 | 61,492 | none |  |
| Region 7.2 | NRPS | 101,832 | 162,723 | none |  |
| Region 7.3 | terpene | 282,746 | 303,902 | none |  |
| Region 7.4 | fungal-RiPP-like | 699,003 | 803,474 | asperipin 2a |  |
| Region 7.5 | NRPS-like | 809,519 | 852,899 | none |  |
| Region 7.6 | terpene | 1,033,957 | 1,055,373 | heptelidic acid |  |
| Region 7.7 | indole | 1,879,408 | 1,900,782 | none |  |
| Region 7.8 | T1PKS | 2,759,105 | 2,804,451 | none |  |
| Region 8.1 | NRPS | 321,563 | 382,616 | none |  |
| Region 8.2 | NRPS | 447,398 | 493,228 | none |  |
| Region 8.3 | NRPS,T1PKS | 669,369 | 725,911 | none |  |
| Region 8.4 | NRPS | 810,726 | 859,335 | none |  |
| Region 8.5 | NRPS-like | 2,034,165 | 2,077,266 | none |  |
| Region 8.6 | NRPS-like | 2,223,650 | 2,266,963 | none |  |
| Region 8.7 | T1PKS | 2,267,047 | 2,323,362 | none |  |
| Region 8.8 | NRPS-like | 2,406,469 | 2,449,772 | none |  |
| Region 8.9 | terpene | 2,850,398 | 2,872,007 | none |  |
| Region 8.10 | T1PKS | 3,081,938 | 3,129,701 | none |  |
| Region 8.11 | T1PKS | 3,256,011 | 3,302,476 | 8-methyldiaporthin |  |

**Supplementary table 4.** Annotated biosynthetic repertoire of *A. niger* ATCC1015

| **Region** | **Type** | **From** | **To** | **Known or predicted product** | **Comment** |
| --- | --- | --- | --- | --- | --- |
| Region 3.1 | RiPP-like | 13,903 | 24,593 | none |  |
| Region 4.1 | NRPS | 497,116 | 556,436 | nidulanin A |  |
| Region 4.2 | NRPS,T1PKS | 881,716 | 933,859 | terrestric acid |  |
| Region 4.3 | NRPS-like | 1,145,593 | 1,191,030 | none |  |
| Region 4.4 | terpene | 1,276,204 | 1,298,225 | none |  |
| Region 4.5 | terpene | 1,453,412 | 1,474,647 | none |  |
| Region 4.6 | NRPS | 2,738,580 | 2,792,907 | none |  |
| Region 4.7 | fungal-RiPP-like | 2,822,651 | 2,892,062 | none |  |
| Region 4.8 | T3PKS | 2,958,617 | 2,999,847 | none |  |
| Region 4.9 | terpene | 3,090,546 | 3,112,870 | none |  |
| Region 4.10 | fungal-RiPP-like | 3,129,195 | 3,190,285 | none |  |
| Region 5.1 | NRPS,T1PKS | 89,313 | 141,272 | pyranoviolin A |  |
| Region 5.2 | fungal-RiPP-like | 163,994 | 224,973 | none |  |
| Region 5.3 | T1PKS | 557,376 | 605,393 | burnettiene A/preburnettiene B/preburnettiene A |  |
| Region 6.1 | NRPS | 36,477 | 88,338 | none |  |
| Region 6.2 | NRPS,T1PKS | 101,073 | 152,922 | pyranonigrin E |  |
| Region 6.3 | terpene | 658,373 | 679,494 | none |  |
| Region 6.4 | T1PKS | 935,825 | 985,142 | none |  |
| Region 6.5 | T1PKS | 997,475 | 1,050,266 | none |  |
| Region 6.6 | NRPS-like,T1PKS | 1,102,965 | 1,157,728 | none |  |
| Region 6.7 | NRPS-like,T1PKS | 1,398,556 | 1,469,970 | none |  |
| Region 6.8 | terpene | 1,589,849 | 1,611,344 | none |  |
| Region 6.9 | T1PKS,NRPS | 1,615,231 | 1,667,250 | none |  |
| Region 6.10 | fungal-RiPP-like,T1PKS | 1,732,845 | 1,834,298 | TAN-1612 |  |
| Region 6.11 | T1PKS | 2,370,151 | 2,417,642 | none |  |
| Region 7.1 | T1PKS | 1 | 36,684 | aflavarin |  |
| Region 7.2 | T1PKS | 106,484 | 154,976 | none |  |
| Region 9.1 | NRPS-like | 272,999 | 316,052 | none |  |
| Region 9.2 | T1PKS,NRPS-like | 1,090,748 | 1,147,657 | none |  |
| Region 9.3 | NRPS-like | 1,332,541 | 1,377,026 | none |  |
| Region 9.4 | NI-siderophore | 1,378,528 | 1,408,671 | none |  |
| Region 9.5 | NRPS | 1,560,588 | 1,607,665 | none |  |
| Region 10.1 | NRPS | 1 | 40,418 | none |  |
| Region 10.2 | T1PKS | 44,093 | 94,370 | none |  |
| Region 10.3 | terpene,NRPS | 161,597 | 208,662 | none |  |
| Region 10.4 | terpene | 212,481 | 235,561 | none |  |
| Region 10.5 | T1PKS | 385,531 | 431,995 | none |  |
| Region 10.6 | NRPS | 722,303 | 768,653 | none |  |
| Region 10.7 | terpene | 1,073,785 | 1,095,400 | none |  |
| Region 10.8 | T1PKS,fungal-RiPP-like | 1,130,613 | 1,248,465 | duclauxin |  |
| Region 10.9 | NRPS-like | 1,255,361 | 1,298,378 | none |  |
| Region 10.10 | NRPS | 1,329,221 | 1,375,775 | none |  |
| Region 10.11 | T1PKS | 1,414,457 | 1,469,935 | none |  |
| Region 11.1 | NRPS | 1 | 52,416 | none |  |
| Region 11.2 | fungal-RiPP-like | 244,016 | 304,854 | none |  |
| Region 12.1 | NRPS-like | 111,725 | 154,820 | none |  |
| Region 13.1 | T1PKS | 13,780 | 59,143 | yanuthone D |  |
| Region 13.2 | terpene | 408,658 | 429,812 | none |  |
| Region 15.1 | NRPS-like | 94,288 | 138,118 | none |  |
| Region 15.2 | T1PKS | 139,401 | 187,969 | none |  |
| Region 15.3 | NRPS-like | 225,667 | 268,986 | none |  |
| Region 15.4 | NRPS | 1,262,721 | 1,308,430 | none |  |
| Region 15.5 | T1PKS,NRPS | 2,089,099 | 2,141,198 | none |  |
| Region 15.6 | T1PKS | 2,421,821 | 2,469,643 | none |  |
| Region 15.7 | NRPS-like | 2,604,456 | 2,647,242 | none |  |
| Region 15.8 | terpene | 2,832,140 | 2,854,703 | none |  |
| Region 16.1 | NRPS,T1PKS | 1 | 38,652 | none |  |
| Region 16.2 | fungal-RiPP-like,T1PKS | 184,634 | 288,555 | none |  |
| Region 16.3 | indole | 544,714 | 566,073 | none |  |
| Region 17.1 | T1PKS | 566,439 | 614,743 | none |  |
| Region 17.2 | T1PKS | 979,639 | 1,027,813 | none |  |
| Region 17.3 | T1PKS | 1,203,469 | 1,251,016 | none |  |
| Region 17.4 | NRPS | 1,783,005 | 1,840,536 | none |  |
| Region 18.1 | NRPS-like,fungal-RiPP-like | 44,548 | 124,649 | none |  |
| Region 18.2 | NRPS-like | 243,741 | 284,620 | none |  |
| Region 19.1 | T1PKS | 1,045,756 | 1,092,569 | none |  |
| Region 19.2 | NRPS | 1,093,624 | 1,145,686 | none |  |
| Region 20.1 | NI-siderophore,fungal-RiPP-like | 147,623 | 211,342 | none |  |
| Region 20.2 | NRPS | 237,152 | 293,644 | none |  |
| Region 20.3 | NRPS,T1PKS | 465,139 | 573,613 | none |  |
| Region 20.4 | T1PKS | 655,187 | 702,955 | none |  |
| Region 20.5 | terpene,fungal-RiPP-like | 718,650 | 791,630 | none |  |
| Region 21.1 | terpene | 425,655 | 447,466 | none |  |
| Region 21.2 | T1PKS | 593,306 | 643,437 | none |  |
| Region 21.3 | isocyanide | 681,483 | 723,723 | none |  |
| Region 21.4 | T1PKS | 1,753,171 | 1,812,221 | fumonisin-like |  |
| Region 21.5 | fungal-RiPP-like | 1,990,714 | 2,056,022 | none |  |
| Region 21.6 | NRPS-like | 2,888,567 | 2,940,372 | none |  |
| Region 21.7 | betalactone | 3,265,572 | 3,294,682 | none |  |
| Region 21.8 | NRPS-like | 3,680,736 | 3,724,529 | none |  |
| Region 22.1 | indole | 460,098 | 481,548 | none |  |
| Region 22.2 | T1PKS,NRPS-like | 584,885 | 640,047 | none |  |
| Region 22.3 | NRPS,T1PKS | 682,321 | 752,972 | none |  |
| Region 23.1 | T1PKS,NRPS | 470,512 | 521,905 | none |  |
| Region 23.2 | terpene | 527,440 | 548,657 | none |  |
| Region 23.3 | T1PKS,NRPS-like | 1,157,902 | 1,206,477 | pyrophen/campyrone B |  |
| Region 24.1 | NRPS-like,NRPS | 103,119 | 168,526 | none |  |
| Region 24.2 | T1PKS | 286,503 | 334,715 | none |  |
| Region 24.3 | NRPS,T1PKS | 375,065 | 482,946 | azanigerone s |  |
| Region 24.4 | terpene | 587,333 | 608,289 | none |  |
| Region 24.5 | NRPS-like | 1,155,541 | 1,201,510 | kojic acid |  |
| Region 24.6 | T1PKS | 1,223,371 | 1,271,548 | none |  |
| Region 24.7 | T1PKS | 1,321,446 | 1,368,125 | YWA1 |  |
| Region 24.8 | terpene | 1,415,601 | 1,436,356 | none |  |
| Region 24.9 | terpene | 1,515,308 | 1,537,624 | none |  |

**Supplementary table 5.** Annotated biosynthetic repertoire of *A. nidulans* IBT29539

| **Region** | **Type** | **From** | **To** | **Known or predicted product** |
| --- | --- | --- | --- | --- |
| Region 1.1 | T1PKS,NRPS-like | 119,085 | 178,463 | none |
| Region 1.2 | T1PKS | 186,271 | 234,310 | none |
| Region 1.3 | NRPS | 776,758 | 823,124 | none |
| Region 1.4 | T1PKS | 1,522,669 | 1,568,214 | asperthecin |
| Region 1.5 | indole,T1PKS | 3,092,076 | 3,155,930 | none |
| Region 2.1 | NRPS | 96,874 | 158,684 | aspercryptins |
| Region 2.2 | T1PKS | 186,866 | 233,367 | F9775A/F9775B/orsellinic acid |
| Region 2.3 | NRPS-like | 743,960 | 787,193 | none |
| Region 2.4 | T1PKS | 1,116,199 | 1,162,873 | none |
| Region 2.5 | terpene | 1,257,070 | 1,279,462 | none |
| Region 2.6 | terpene | 1,292,718 | 1,315,061 | none |
| Region 2.7 | NRPS-like | 2,595,331 | 2,638,584 | none |
| Region 2.8 | T1PKS | 3,525,341 | 3,581,457 | none |
| Region 2.9 | NRPS | 3,904,481 | 3,956,952 | fellutamide B |
| Region 3.1 | NRPS-like | 835,230 | 878,599 | none |
| Region 3.2 | NRPS | 1,411,062 | 1,456,237 | N-Acetyltryptophan |
| Region 3.3 | fungal-RiPP-like | 3,245,715 | 3,306,361 | none |
| Region 4.1 | fungal-RiPP-like | 456,860 | 517,759 | none |
| Region 4.2 | T1PKS | 1,055,894 | 1,145,772 | none |
| Region 4.3 | T1PKS | 2,706,898 | 2,796,511 | none |
| Region 5.1 | fungal-RiPP-like,T1PKS | 251,483 | 332,132 | paraherquonin |
| Region 5.2 | NRPS,T1PKS | 372,716 | 424,651 | aspyridone A/aspyridone B |
| Region 5.3 | indole | 622,992 | 644,367 | none |
| Region 5.4 | NRPS,NRPS-like,indole | 679,561 | 755,025 | terrequinone A |
| Region 5.5 | NRPS-like | 1,943,029 | 1,987,466 | none |
| Region 5.6 | terpene | 2,779,471 | 2,800,103 | none |
| Region 5.7 | NRPS-like | 2,882,578 | 2,926,390 | none |
| Region 5.8 | betalactone | 3,035,403 | 3,059,406 | none |
| Region 6.1 | indole,NRPS,T1PKS | 8,452 | 93,676 | none |
| Region 6.2 | terpene | 148,531 | 169,843 | none |
| Region 6.3 | betalactone | 341,306 | 370,977 | none |
| Region 6.4 | NRPS-like,T1PKS | 770,461 | 854,543 | microperfuranone |
| Region 6.5 | terpene | 857,965 | 879,531 | none |
| Region 6.6 | terpene | 1,192,659 | 1,213,838 | none |
| Region 6.7 | T1PKS | 1,321,776 | 1,368,556 | aspernidine A |
| Region 6.8 | NRPS-like | 2,309,165 | 2,352,581 | none |
| Region 6.9 | NRPS | 3,289,871 | 3,341,183 | betalactam |
| Region 7.1 | T1PKS | 132,386 | 180,547 | none |
| Region 7.2 | T1PKS | 460,420 | 508,155 | none |
| Region 7.3 | NRPS-like | 1,522,767 | 1,566,533 | none |
| Region 7.4 | T1PKS | 1,796,436 | 1,844,294 | aspernidgulene A1/aspernidgulene A2/aspernidgulene B1 |
| Region 7.5 | T1PKS | 2,565,308 | 2,623,145 | none |
| Region 7.6 | NRPS-like | 2,659,148 | 2,702,326 | none |
| Region 7.7 | indole | 3,560,138 | 3,581,539 | none |
| Region 7.8 | NRPS-like | 3,735,929 | 3,779,204 | none |
| Region 7.9 | NRPS,T1PKS | 4,210,453 | 4,282,984 | emericellamide A/emericellamide B |
| Region 7.10 | terpene | 4,357,303 | 4,378,844 | none |
| Region 7.11 | isocyanide | 4,426,984 | 4,469,144 | none |
| Region 8.1 | NRPS | 18,230 | 69,458 | none |
| Region 8.2 | NRPS | 999,461 | 1,058,626 | nidulanin A |
| Region 8.3 | T1PKS | 1,648,237 | 1,709,104 | asperfuranone |
| Region 8.4 | betalactone | 2,236,202 | 2,266,635 | none |
| Region 8.5 | terpene | 2,815,091 | 2,836,281 | none |
| Region 8.6 | NRPS | 2,924,113 | 2,978,540 | none |
| Region 8.7 | T1PKS | 3,204,692 | 3,252,661 | none |
| Region 8.8 | T1PKS | 4,367,684 | 4,413,245 | none |
| Region 8.9 | terpene | 4,703,260 | 4,724,512 | none |
| Region 8.10 | NRPS | 4,773,417 | 4,831,610 | none |

**Supplementary table 6.** Annotated biosynthetic repertoire of *E. viscosa* JF 03-3F

| **Region** | **Type** | **From** | **To** | **Known or predicted product** |
| --- | --- | --- | --- | --- |
| Region 1.1 | terpene | 1,150,812 | 1,172,827 | Carotenoids (*phs1* locus) |
| Region 1.2 | NRPS-like | 4,162,606 | 4,206,445 | none |
| Region 1.3 | betalactone | 5,242,023 | 5,273,622 | none |
| Region 1.4 | NRPS-like | 5,303,394 | 5,357,519 | none |
| Region 2.1 | T3PKS | 1,181,000 | 1,222,332 | none |
| Region 2.2 | NRP-metallophore,NRPS | 1,719,259 | 1,778,392 | none |
| Region 2.3 | T1PKS | 1,845,641 | 1,892,849 | none |
| Region 2.4 | NRPS-like | 3,581,318 | 3,627,007 | none |
| Region 3.1 | NRPS-like | 641,282 | 686,269 | none |
| Region 3.2 | NRPS | 2,314,302 | 2,372,952 | none |
| Region 4.1 | terpene | 304,162 | 325,397 | none |
| Region 5.1 | NRPS | 673,682 | 718,086 | none |
| Region 6.1 | phosphonate-like | 437,840 | 478,727 | none |
| Region 9.1 | T1PKS | 208,054 | 254,751 | Melanin (*pks1* locus) |
| Region 9.2 | NRPS-like | 663,059 | 705,967 | none |
| Region 9.3 | terpene | 726,043 | 747,206 | none |
| Region 9.4 | terpene | 801,428 | 823,705 | none |
| Region 10.1 | NRPS-like | 173,381 | 216,702 | none |
| Region 10.2 | terpene | 811,071 | 832,701 | none |
| Region 13.1 | NRPS | 183,669 | 230,073 | none |
| Region 19.1 | NRPS-like | 4,218 | 86,328 | none |
| Region 19.2 | T1PKS | 116,458 | 164,024 | none |

**Supplementary table 7.** Annotated biosynthetic repertoire of *E. viscosa* JF 03-4F

| **Region** | **Type** | **From** | **To** | **Known or predicted product** |
| --- | --- | --- | --- | --- |
| Region 1.1 | T3PKS | 1,217,848 | 1,259,180 | none |
| Region 1.2 | NRP-metallophore,NRPS | 1,778,533 | 1,835,633 | none |
| Region 1.3 | T1PKS | 1,903,060 | 1,950,268 | none |
| Region 1.4 | NRPS-like | 3,627,792 | 3,673,699 | none |
| Region 2.1 | NRPS-like | 57,358 | 111,483 | none |
| Region 2.2 | betalactone | 141,241 | 172,840 | none |
| Region 2.3 | NRPS-like | 1,212,877 | 1,256,716 | none |
| Region 3.1 | NRPS | 442,084 | 486,488 | none |
| Region 3.2 | terpene | 1,787,332 | 1,809,609 | none |
| Region 3.3 | terpene | 1,857,261 | 1,878,424 | none |
| Region 3.4 | NRPS-like | 1,910,638 | 1,953,540 | none |
| Region 3.5 | T1PKS | 2,324,092 | 2,370,789 | Melanin (*pks1* locus) |
| Region 4.1 | terpene | 2,084,026 | 2,105,430 | None |
| Region 4.2 | NRPS-like | 2,692,748 | 2,736,090 | None |
| Region 5.1 | NRPS-like | 885,752 | 930,739 | None |
| Region 5.2 | NRPS | 2,551,955 | 2,610,605 | None |
| Region 5.3 | T1PKS | 2,738,319 | 2,785,814 | None |
| Region 5.4 | NRPS-like | 2,811,597 | 2,892,770 | None |
| Region 7.1 | phosphonate-like | 939,617 | 980,504 | None |
| Region 8.1 | terpene | 759,991 | 781,226 | None |
| Region 9.1 | terpene | 700,845 | 722,860 | Carotenoids (*phs1* locus) |
| Region 14.1 | NRPS | 479,648 | 526,001 | none |

**Supplementary table 8.** Annotated biosynthetic repertoire of *K. petricola* CBS123872

| **Region** | **Type** | **From** | **To** | **Known or predicted product** |
| --- | --- | --- | --- | --- |
| Region 2.1 | terpene | 524,006 | 541,770 | none |
| Region 5.1 | T3PKS | 208,718 | 249,996 | none |
| Region 6.1 | T1PKS | 115,175 | 160,702 | Melanin (*pks1* locus) |
| Region 9.1 | terpene | 130,363 | 151,846 | none |
| Region 19.1 | NRPS | 116,133 | 170,824 | none |
| Region 36.1 | NRPS | 69,558 | 113,346 | none |
| Region 42.1 | NRPS-like | 114,288 | 158,517 | none |
| Region 45.1 | NRPS-like | 6,475 | 49,800 | none |
| Region 55.1 | fungal-RiPP-like | 1 | 37,979 | none |
| Region 65.1 | terpene | 127,276 | 139,897 | none |
| Region 96.1 | NRPS-like | 25,407 | 68,553 | none |
| Region 97.1 | NRPS-like | 12,564 | 56,088 | none |
| Region 112.1 | terpene | 51,811 | 73,816 | Carotenoids (*phs1* locus) |
| Region 123.1 | NRPS-like | 20,362 | 64,195 | none |

**Supplementary table 9.** Genome sizes of *S. cerevisiae, A. oryzae, A. niger, A. nidulans, E. viscosa* JF 03-3F*, E. viscosa* JF 03-4F

| **Species** | **Strain ID** | **Genome size (Mb)** | **Reference** |
| --- | --- | --- | --- |
| *A. nidulans* | IBT29539 | 29.8 | 2,3 |
| *A. niger* | ATCC1015 | 34.85 | 1,4 |
| *A. oryzae* | RIB40 | 37.9 | 5,6 |
| *E. viscosa* | JF 03-3F/ CBS148801 | 28.3 | 7 |
| *E. viscosa* | JF 03-4F/  CBS148802 | 28.2 | 7 |
| *K. petricola* | CBS123872 | 27.8 | 8 |
| *S. cerevisiae* | S288C | 12.1 | 9 |

**Supplementary table 10.** Strain list

| **sYNPID** | **NAME** | **GENOTYPE** | **REFERENCE** |
| --- | --- | --- | --- |
| sYNP19185 | *A. nidulans* NID1 | *argB2, pyrG89, veA1, nkuAΔ* | 2 |
| sYNP19186 | *A. niger* NIG96 | *pyrG1, kusAΔ* | 1 |
| sYNP19187 | *A. oryzae* ORY4 | *pyrGΔ, ku70Δ* | 5 |
|  | *S. cerevisiae* CEN.PK113-5D | *MAT*a *ura3-52 TRP1 LEU2 HIS3* | 10 |
|  | *S. cerevisiae* IMX581(Y40593) | *MAT*a *ura3-52 can1Δ::cas9-natNT2 TRP1 LEU2 HIS3* | 11 |
| sYNP19188 | *S. cerevisiae* NPE9 | *MATa, ura3-52, can1Δ::cas9-natNT2, TRP1, LEU2, HIS3, GAL80::pTEF1-npgA* | This work |
| sYNP19189 | *S. cerevisiae* POP4 | *MATa ura3-52 can1Δ::cas9-natNT2 TRP1 LEU2 HIS3, GAL80::pTEF1-npgA, XI-1::pTPI1-eutE_pGND1-metK1_pCIT2-gapN, tACC1::gRNA* | This work |
| sYNP19190 | *S. cerevisiae* BJ5464-NpgA | *MATa ura3-52 trp1 leu2- Δ1 his3- Δ200 pep4::HIS3 prb1- Δ 1.6R can1 GAL* | 12,13 |
| sYNP12568 | *E. viscosa* J3-03-3F | *WT* | 7 |
| sYNP12569 | *E. viscosa* J3-03-4F | *WT* | 7 |
| sYNP12566 | *K. petricola* CBS123872 | *WT* | 8 |
| sYNP14083 | *E. viscosa* J3-03-3F *ku70*Δ | *ku70Δ27* | This work |
| sYNP14084 | *E. viscosa* J3-03-4F *ku70*Δ | *ku70Δ27-28* | This work |
| sYNP14085 | *K. petricola* CBS123872 *Δku70* | *Δku70* | This work |
| sYNP19191 | *E. viscosa* J3-03-3F *Δpks1* | *ku70Δ27, Δpks1* | This work |
| sYNP19192 | *E. viscosa* J3-03-4F *Δpks1* | *ku70Δ27-28, Δpks1* | This work |
| sYNP19193 | *K. petricola* CBS123872 *Δpks1* | *Δku70, Δpks1* | This work |
| sYNP19194 | *E. viscosa* J3-03-3F *Δpks1, Δphs1* | *ku70Δ27, Δpks1, Δphs1* | This work |
| sYNP19195 | *E. viscosa* J3-03-4F *Δpks1, Δphs1* | *ku70Δ27-28, Δpks1, Δphs1* | This work |
| sYNP19196 | *K. petricola* CBS123872 *Δpks1, Δphs1* | *Δku70, Δpks1, Δphs1* | This work |
| sYNP19197 | *S. cerevisiae* NPE9_6MSA_REP1 | *MATa, ura3-52, can1Δ::cas9-natNT2, TRP1, LEU2, HIS3, GAL80::pTEF1-npgA, ISX-2:: pTEF1-atX6MSA-tADH1* | This work |
| sYNP19198 | *S. cerevisiae* NPE9_6MSA_REP2 | *MATa, ura3-52, can1Δ::cas9-natNT2, TRP1, LEU2, HIS3, GAL80::pTEF1-npgA, ISX-2:: pTEF1-atX6MSA-tADH1* | This work |
| sYNP19199 | *S. cerevisiae* NPE9_6MSA_REP3 | *MATa, ura3-52, can1Δ::cas9-natNT2, TRP1, LEU2, HIS3, GAL80::pTEF1-npgA, ISX-2:: pTEF1-atX6MSA-tADH1* | This work |
| sYNP14092 | *S. cerevisiae* POP4_6MSA_REP1 | *MATa ura3-52 can1Δ::cas9-natNT2 TRP1 LEU2 HIS3, GAL80::pTEF1-npgA, XI-1::pTPI1-eutE_pGND1-metK1_pCIT2-gapN, tACC1::gRNA, ISX-2:: pTEF1-atX6MSA-tADH1* | This work |
| sYNP14093 | *S. cerevisiae* POP4_6MSA_REP2 | *MATa ura3-52 can1Δ::cas9-natNT2 TRP1 LEU2 HIS3, GAL80::pTEF1-npgA, XI-1::pTPI1-eutE_pGND1-metK1_pCIT2-gapN, tACC1::gRNA, ISX-2:: pTEF1-atX6MSA-tADH1* | This work |
| sYNP14094 | *S. cerevisiae* POP4*_*6MSA_REP3 | *MATa ura3-52 can1Δ::cas9-natNT2 TRP1 LEU2 HIS3, GAL80::pTEF1-npgA, XI-1::pTPI1-eutE_pGND1-metK1_pCIT2-gapN, tACC1::gRNA, ISX-2:: pTEF1-atX6MSA-tADH1* | This work |
| sYNP19200 | *E. viscosa* J3-03-3F*_*6MSA_REP1 | *ku70Δ27, Δpks1::pTEF1-atX6MSA-TtrpC* | This work |
| sYNP19201 | *E. viscosa* J3-03-3F*_*6MSA_REP2 | *ku70Δ27, Δpks1::pTEF1-atX6MSA-TtrpC* | This work |
| sYNP19202 | *E. viscosa* J3-03-3F*_*6MSA_REP3 | *ku70Δ27, Δpks1::pTEF1-atX6MSA-TtrpC* | This work |
| sYNP19203 | *E. viscosa* J3-03-4F*_*6MSA_REP1 | *ku70Δ27-28, Δpks1::pTEF1-atX6MSA-TtrpC* | This work |
| sYNP19204 | *E. viscosa* J3-03-4F*_*6MSA_REP2 | *ku70Δ27-28, Δpks1::pTEF1-atX6MSA-TtrpC* | This work |
| sYNP19205 | *E. viscosa* J3-03-4F*_*6MSA_REP3 | *ku70Δ27-28, Δpks1::pTEF1-atX6MSA-TtrpC* | This work |
| sYNP19206 | *K. petricola_*6MSA_REP1 | *Δku70, Δpks1::pTEF1-atX6MSA-TtrpC* | This work |
| sYNP19207 | *K. petricola_*6MSA_REP2 | *Δku70, Δpks1::pTEF1-atX6MSA-TtrpC* | This work |
| sYNP19208 | *K. petricola_*6MSA_REP3 | *Δku70, Δpks1::pTEF1-atX6MSA-TtrpC* | This work |
| sYNP19209 | S. cerevisiae POP4_YWA1 | *MATa ura3-52 can1Δ::cas9-natNT2 TRP1 LEU2 HIS3, GAL80::pTEF1-npgA, XI-1::pTPI1-eutE_pGND1-metK1_pCIT2-gapN, tACC1::gRNA, [pYNP100-pTEF1-FaYWA1-tCYC1 (URA3)]* | This work |
| sYNP19210 | *E. viscosa* J3-03-3F*_*YWA1 | *ku70Δ27, Δpks1::pks12* | This work |
| sYNP19211 | *E. viscosa* J3-03-4F_YWA1 | *ku70Δ27, Δpks1::pks12* | This work |
| sYNP19212 | *K. petricola*_YWA1 | *Δku70, Δpks1::pks12* | This work |
| sYNP19213 | *S. cerevisiae* POP4_Monocillin_REP1 | *MATa ura3-52 can1Δ::cas9-natNT2 TRP1 LEU2 HIS3, GAL80::pTEF1-npgA, XI-1::pTPI1-eutE_pGND1-metK1_pCIT2-gapN, tACC1::gRNA, ISX-2:: pTEF1-pchI-tCYC1, ISXII-1:: pTEF1-pchE-tCYC1* | This work |
| sYNP19214 | *S. cerevisiae* POP4_Monocillin_REP2 | *MATa ura3-52 can1Δ::cas9-natNT2 TRP1 LEU2 HIS3, GAL80::pTEF1-npgA, XI-1::pTPI1-eutE_pGND1-metK1_pCIT2-gapN, tACC1::gRNA, ISX-2:: pTEF1-pchI-tCYC1, ISXII-1:: pTEF1-pchE-tCYC1* | This work |
| sYNP19215 | *S. cerevisiae* POP4_Monocillin_REP3 | *MATa ura3-52 can1Δ::cas9-natNT2 TRP1 LEU2 HIS3, GAL80::pTEF1-npgA, XI-1::pTPI1-eutE_pGND1-metK1_pCIT2-gapN, tACC1::gRNA, ISX-2:: pTEF1-pchI-tCYC1, ISXII-1:: pTEF1-pchE-tCYC1* | This work |
| sYNP19216 | *S. cerevisiae* POP4_Monocillin_REP4 | *MATa ura3-52 can1Δ::cas9-natNT2 TRP1 LEU2 HIS3, GAL80::pTEF1-npgA, XI-1::pTPI1-eutE_pGND1-metK1_pCIT2-gapN, tACC1::gRNA, ISX-2:: pTEF1-pchI-tCYC1, ISXII-1:: pTEF1-pchE-tCYC1* | This work |
| sYNP19217 | *E. viscosa* J3-03-3F*_*Monocillin | *ku70Δ27, Δpks1::pchI, Δphs1::pTEF1-pchE-TtrpC* | This work |
| sYNP19218 | *E. viscosa* J3-03-4F_Monocillin | *ku70Δ27-28, Δpks1::pchI, Δphs1::pTEF1-pchE-TtrpC* | This work |
| sYNP19219 | *K. petricola*_Monocillin | *Δku70, Δpks1::pchI, Δphs1::pTEF1-pchE-TtrpC* | This work |
| sYNP19220 | *S. cerevisiae* POP4_YNP1 | *MATa ura3-52 can1Δ::cas9-natNT2 TRP1 LEU2 HIS3, GAL80::pTEF1-npgA, XI-1::pTPI1-eutE_pGND1-metK1_pCIT2-gapN, tACC1::gRNA, ISX-2:: pTEF1-adnE1-tCYC1, ISXII-1::tADH1-adnE2-pPGKA-pTDH3-adnE3-tTEF1* | This work |
| sYNP19221 | *E. viscosa* J3-03-3F_YNP1 | *ku70Δ27, Δpks1::adnE1, Δphs1::tArgB-adnE2-pTEF1-pgpdA-adnE3-TpkiA* | This work |
| sYNP19222 | *E. viscosa* J3-03-4F_YNP1 | *ku70*Δ27-28*, Δpks1::adnE1, Δphs1::tArgB-adnE2-pTEF1-pgpdA-adnE3-TpkiA* | This work |
| sYNP19223 | *K. petricola*_YNP1 | *Δku70, Δpks1::adnE1, Δphs1::tArgB-adnE2-pTEF1-pgpdA-adnE3-TpkiA* | This work |
| sYNP19224 | *E. viscosa* J3-03-4F*_*FIX_ER | *ku70Δ27-28, Δpks1::adnE1, Δphs1::TArgB-adnE2-pTEF1-pgpdA-FIXER-TtrpC-pA00583-CYP450-TpkiA* | This work |
| sYNP19225 | *E. viscosa* J3-03-4F*_*FIX_CYP450 | *ku70Δ27-28, Δpks1::adnE1, Δphs1::TArgB-adnE2-pTEF1-pgpdA-ER-TtrpC-pA00583-FIXCYP450-TpkiA* | This work |
| sYNP19226 | *E. viscosa* J3-03-4F_FIX_NON | *ku70Δ27-28, Δpks1::adnE1, Δphs1::TArgB-adnE2-pTEF1-pgpdA-ER-TtrpC-pA00583-CYP450-TpkiA* | This work |
| sYNP19227 | *E. viscosa* J3-03-4F_FIX_BOTH | *ku70Δ27-28, Δpks1::adnE1, Δphs1::TArgB-adnE2-pTEF1-pgpdA-FIXER-TtrpC-pA00583-FIXCYP450-TpkiA* | This work |
| sYNP19228 | *S. cerevisiae* POP4_YNP1_pYNP78 | *MATa ura3-52 can1Δ::cas9-natNT2 TRP1 LEU2 HIS3, GAL80::pTEF1-npgA, XI-1::pTPI1-eutE_pGND1-metK1_pCIT2-gapN, tACC1::gRNA, ISX-2:: pTEF1-adnE1-tCYC1, ISXII-1::tADH1-adnE2-pPGKA-pTDH3-adnE3-tTEF1, [pYNP78-pTEF1-adnE1-tCYC1 (URA3)]* | This work |
| sYNP19229 | *S. cerevisiae* BJ5464_pYNP78 | *MATa ura3-52 trp1 leu2- Δ1 his3- Δ200 pep4::HIS3 prb1- Δ 1.6R can1 GAL, [pYNP78-pTEF1-adnE1-tCYC1 (URA3)]* | This work |

**Supplementary table 11.** Primer list

| **PR_YNPID** | **PRIMER NAME** | **PRIMER SEQUENCE** |
| --- | --- | --- |
| PR_YNP121 | ELIM_PKS1_UP_FW | GGGTTTAAUAAGAGAGTATCGTCCACCGCTG |
| PR_YNP122 | ELIM_PKS1_UP_RV | GGACTTAAUATGTTGCTGGGTGATGAGTCG |
| PR_YNP123 | ELIM_PKS1_DW_FW | GGCATTAAUGATGTAGAGGACGAGCGACCAC |
| PR_YNP124 | ELIM_PKS1_DW_RV | GGTCTTAAUACTGCCGGATCTTCGACTAGG |
| PR_YNP125 | EVIS_PKS1_UP_FW | GGGTTTAAUTCTCCGCGTGGTGCCAAC |
| PR_YNP126 | EVIS_PKS1_UP_RV | GGACTTAAUAACGCATCTCGAATGAGGGTC |
| PR_YNP127 | EVIS_PKS1_DW_FW | GGCATTAAUTGGTAGGTGAAGTGACAGCGC |
| PR_YNP128 | EVIS_PKS1_DW_RV | GGTCTTAAUATGGGAGGAGTAACATCACGC |
| PR_YNP129 | KP_PKS1_UP_FW | GGGTTTAAUTCCTGAACGGTGAATACGCC |
| PR_YNP130 | KP_PKS1_UP_RV | GGACTTAAUAGTGAAATGTGAATGAGTGTCGAC |
| PR_YNP131 | KP_PKS1_DW_FW | GGCATTAAUGCAACCACACGAACCTACTCAC |
| PR_YNP132 | KP_PKS1_DW_RV | GGTCTTAAUCGTAGGTAGCTGCACAGGATAAC |
| PR_YNP135 | PgpdA_FW | GGGTTTAAUGCGTAAGCTCCCTAATTGGC |
| PR_YNP136 | Ttrpc_RV | GGTCTTAAUGAGCCAAGAGCGGATTCCTC |
| PR_YNP171 | Sc_IS_X2_60BP_UP_FW_6MSA | ATATTAAGTAAATTGCCTCCATTTCTTTTTCCTCGGGCAGAGAAACTCGCAGGCAACTTGTAAGAGCTCGCACACACCATAG |
| PR_YNP172 | Sc_IS_X2_60BP_UP_RV_6MSA | GCGGAGGAATAGTATGATAAATCTTCAGCATAGATGGGTAACGGGATCCCTCTGTGAGGGGCGGTACCAAGCTTACTCGAG |
| PR_YNP177 | KP_KU70_HH_sgRNA1_FW | AGTAAGCUCGTCCGACGAGTCCGGCTACAAGCGTTTTAGAGCTAGAAATAGCAAGTTAAA |
| PR_YNP178 | KP_KU70_HH_sgRNA1_RV | AGCTTACUCGTTTCGTCCTCACGGACTCATCAGCGACGACGGTGATGTCTGCTCAAGCG |
| PR_YNP181 | EX_KU70_HH_sgRNA1_FW | AGTAAGCUCGTCCGTCCGGTTCATCCTTCGATGTTTTAGAGCTAGAAATAGCAAGTTAAA |
| PR_YNP182 | EX_KU70_HH_sgRNA1_RV | AGCTTACUCGTTTCGTCCTCACGGACTCATCAGCGTCCGCGGTGATGTCTGCTCAAGCG |
| PR_YNP185 | KP_KU70_1KB_UP_FW | GGGTTTAAUATCGAGCCTGGTGGGTGC |
| PR_YNP186 | KP_KU70_1KB_UP_RV | ATCTAGAAGCUGGAACCCGTCGGAAG |
| PR_YNP187 | KP_KU70_1KB_DW_FW | AGCTTCTAGAUACGGTTACATCAATGGCCTTC |
| PR_YNP188 | KP_KU70_1KB_DW_RV | GGTCTTAAUCTCAGGGCACAGCGTACACC |
| PR_YNP189 | EXVIS_KU70_1KB_UP_FW | GGGTTTAAUCACTTCCATAATTCGTTCAGCG |
| PR_YNP190 | EXVIS_KU70_1KB_UP_RV | ATCTAGACGGUAAGGTAAGTTGTCGGCC |
| PR_YNP191 | EXVIS_KU70_1KB_DW_FW | ACCGTCTAGAUCGATGATGAAGTGCCTGATTGC |
| PR_YNP192 | EXVIS_KU70_1KB_DW_RV | GGTCTTAAUTAGCGATGGCAGAGTACCTTG |
| PR_YNP193 | EXLIM_KU70_1KB_UP_FW | GGGTTTAAUTAGCGATGGCAGAGTACCTTG |
| PR_YNP194 | EXLIM_KU70_1KB_UP_RV | ATCTAGATGAUGATGAAGTGCCTGATTGC |
| PR_YNP195 | EXLIM_KU70_1KB_DW_FW | ATCATCTAGAUCGGTAGGGTAAGTTGTCGGC |
| PR_YNP196 | EXLIM_KU70_1KB_DW_RV | GGTCTTAAUCACTTCCATAATTCGTTCAGCG |
| PR_YNP204 | 6MSA_AORY_OPT_PACI_ASISI_FW | GGGTTTAAUGCTGAGGGTTTAATTAAGTCCTCAGCGAATGCACGCGATCGCAC |
| PR_YNP205 | 6MSA_AORY_OPT_PACI_RV | GGTCTTAAUGCTGAGGTCTTAATTAATGCCTCAGCAACAAGTGTACCTGTGCATTCTGG |
| PR_YNP213 | Afum_pU3_FW | GGGTTTAAUGATCACATAGATGCTCGGTTGACA |
| PR_YNP214 | Afum_tU3_RV | GGTCTTAAUACCCTGAGAAGATAGATGTGAATGTG |
| PR_YNP216 | EX_PKS1_sgRNA_1_FW | ATCCGCCGATUCACTGAGTTTTAGAGCTAGAAATAGCAAGTTAAAATAAG |
| PR_YNP217 | EX_PKS1_sgRNA_1_tRNA_RV | AATCGGCGGAUGCGTGCATCATCCGTGAATCGAAC |
| PR_YNP219 | EX_PHS1_sgRNA_1_tRNA_RV | ATAGTGTAUGAGACGGTGCATCATCCGTGAATCGAAC |
| PR_YNP222 | KP_PKS1_sgRNA_1_FW | ACGTGTTCGGUGACCAAAGTTTTAGAGCTAGAAATAGCAAGTTAAAATAAG |
| PR_YNP223 | KP_PKS1_sgRNA_1_tRNA_RV | ACCGAACACGUAGTGCATCATCCGTGAATCGAAC |
| PR_YNP224 | KP_PHS1_sgRNA_1_FW | ATCCGCCUGGTTTTAGAGCTAGAAATAGCAAGTTAAAATAAG |
| PR_YNP225 | KP_PHS1_sgRNA_1_tRNA_RV | AGGCGGAUAAGCTGCACCGTGCATCATCCGTGAATCGAAC |
| PR_YNP244 | EX_PHS1_sgRNA_1_FW | ATACACTAUCCCAGTTTTAGAGCTAGAAATAGCAAGTTAAAATAAG |
| PR_YNP253 | EVIS_PHS1_UP_FW | GGGTTTAAUCCGTTGTACCAGCCTACAGTCTC |
| PR_YNP254 | EVIS_PHS1_UP_RV | GGACTTAAUCAGGTCAACAAGGTTGGGAATC |
| PR_YNP255 | EVIS_PHS1_DW_FW | GGCATTAAUTGCACTTATTGATAGATAGACTACCCT |
| PR_YNP256 | EVIS_PHS1_DW_RV | GGTCTTAAUGGCAACAGCTCGTTATAGGCG |
| PR_YNP259 | ELIM_PHS1_UP_FW | GGGTTTAAUGGCAACAGCTCGTTATAGGCG |
| PR_YNP260 | ELIM_PHS1_UP_RV | GGACTTAAUTGCACTTATTGATAGATAGACTACCCT |
| PR_YNP261 | ELIM_PHS1_DW_FW | GGCATTAAUCAGGTCAACAAGGTTGGGAATC |
| PR_YNP262 | ELIM_PHS1_DW_RV | GGTCTTAAUCTAGCTCGCCTTCGGCTC |
| PR_YNP263 | KP_PHS1_UP_FW | GGGTTTAAUGTATTTGCCACGCTAATCTTCTTG |
| PR_YNP264 | KP_PHS1_UP_RV | GGACTTAAUGATGTGCAGACGTCTACGCG |
| PR_YNP265 | KP_PHS1_DW_FW | GGCATTAAUATCTGCGTCTAACGGCTCTCG |
| PR_YNP266 | KP_PHS1_DW_RV | GGTCTTAAUAGACAATGTCGGCCTTCAGAG |
| PR_YNP281 | ADNE_TRANSER_FW | ACTACCGCGAUGGCTGCTATACCTCCCACTC |
| PR_YNP282 | ADNE_TRANSERER_TpkiA_PACI_INT_RV | GGTCTTAAUGCTGAGGTCTTAATTAATGCCTCAGCCCTCTTATTGTGCGTTCTATGTTC |
| PR_YNP284 | ADNE_YNP16_SYNTHASE_F1_FW | ATGTCTCCAATGAAACCTGAGAAG |
| PR_YNP285 | ADNE_YNP16_SYNTHASE_F1_RV | CATAGTATCGCCGTCGTCGG |
| PR_YNP286 | ADNE_YNP16_SYNTHASE_F2_FW | ATAAGCCGCTACTATGGCCCCCTACAAATCCCGACGACGGCGATACTATGGCCCAAAATGGCTCCTGG |
| PR_YNP289 | ADNE_YNP16_SYNTHASE_F3_RV | CGTCGCTCCAGTGCCTGC |
| PR_YNP290 | ADNE_YNP16_SYNTHASE_F4_FW | AATTTCCTCGCTGCAAGATCTTGGAGGTTGGTGCAGGCACTGGAGCGACGACCAGCGCGGTTCTGAATG |
| PR_YNP293 | ADNE_YNP16_SYNTHASE_F5_RV | CTAAGATCCCTTCTCTCCCATATAAGG |
| PR_YNP294 | SC_pTEF1_ADNE_50bp_RV | GGCTCCGGAATACGACGCAGCACCGCCTTCTCAGGTTTCATTGGAGACATTTGTAATTAAAACTTAGATTAGATTGCTATG |
| PR_YNP295 | SC_tCYC1_ADNE_50bp_FW | AGAGTGACGCGCAGATGGTTTTTCCTTATATGGGAGAGAAGGGATCTTagATCCGCTCTAACCGAAAAGGAAG |
| PR_YNP296 | Anid_GAPDH_RV | ATCGCGGTAGUGATGTCTGCTC |
| PR_YNP297 | Sc_AdnE1_60bp_X-2_RV | GCGGAGGAATAGTATGATAAATCTTCAGCATAGATGGGTAACGGGATCCCTCTGTGAGGGCTTCGAGCGTCCCAAAACC |
| PR_YNP306 | Anid_pTEF1_rv | AAACATGGUGAAGGTTGTGTTATGTTTTGTG |
| PR_YNP307 | CORDYCEPS_YNP16_CP450_FW | ACCATGTTUGCCCATCTAGAAATCGC |
| PR_YNP308 | Anid_tArgB_pac_asisi_int_RV | GGGTTTAAUGCTGAGGGTTTAATTAAGTCCTCAGCGAATGCACGCGATCGCACGCATTCACCTACAGCCATTGCGAAACC |
| PR_YNP317 | YNP_16_SYNTHETASE_PAC_INT_FW | GGGTTTAAUGCTGAGGGTTTAATTAAGTCCTCAGCATGTCTCCAATGAAACCTGAGAAG |
| PR_YNP318 | YNP_16_SYNTHETASE_PAC_INT_RV | GGTCTTAAUGCTGAGGTCTTAATTAATGCCTCAGCCTAAGATCCCTTCTCTCCCATATAAG |
| PR_YNP319 | ELIM_PKS1_1KB_UP_FW | GGGTTTAAUCATTCCCGTATTGTCTTGTATTGAG |
| PR_YNP320 | ELIM_PKS1_1KB_UP_RV | GGACTTAAUGTTGCTGGGTGATGAGTCGA |
| PR_YNP321 | ELIM_PKS1_1KB_DW_FW | GGCATTAAUAGGACGAGCGACCACATTTTC |
| PR_YNP322 | ELIM_PKS1_1KB_DW_RV | GGTCTTAAUACGTCAGTAAGATATGATAGTACCGTTAG |
| PR_YNP323 | EVIS_PKS1_1KB_UP_FW | GGGTTTAAUCGTGCTCGATTTGTCTTTACATTC |
| PR_YNP324 | EVIS_PKS1_1KB_UP_RV | GGACTTAAUGTTGCTGGGTGATGAGTCGAC |
| PR_YNP325 | EVIS_PKS1_1KB_DW_FW | GGCATTAAUAGGACGAGCGACCACATTTTC |
| PR_YNP326 | EVIS_PKS1_1KB_DW_RV | GGTCTTAAUTACCGTTAGTACACACCTACCCG |
| PR_YNP327 | KP_PKS1_1KB_UP_FW | GGGTTTAAUCCGGATAAGCTCTGGCAAC |
| PR_YNP328 | KP_PKS1_1KB_UP_RV | GGACTTAAUAGTGAAATGTGAATGAGTGTCGAC |
| PR_YNP329 | KP_PKS1_1KB_DW_FW | GGCATTAAUGCAACCACACGAACCTACTCAC |
| PR_YNP330 | KP_PKS1_1KB_DW_RV | GGTCTTAAUCACCGCCCGAGTATTGAGG |
| PR_YNP342 | SC_tTEF1_FW | AGTCAGTACUGACAATAAAAAGATTCTTGT |
| PR_YNP343 | SC_tADH1_RV | ACGCATTCCGUTGGCGAATTTCTTATGATTTATG |
| PR_YNP344 | SC_TRANSER_CP450_FW | ACAAACAAAAUGGCTGCTATACCTCCCACTC |
| PR_YNP345 | SC_TRANSER_CP450_RV | AGTACTGACUAGACTTTGCGTCTCTTGACGAG |
| PR_YNP346 | SC_CP450_FW | ACGGAATGCGUCTACTTGTAGAACGCAATCTTCACTCC |
| PR_YNP347 | SC_CP450_RV | AATCTGTCAUGTTTGCCCATCTAGAAATCGC |
| PR_YNP348 | SC_pTDH3_RV | ATTTTGTTTGUTTATGTGTGTTTATTCGAAACTAAG |
| PR_YNP349 | SC_PGK1_FW | ATGACAGATUTGTTTTATATTTGTTGTAAAAAGTAGATAATTAC |
| PR_YNP358 | SC_60BP_XII-1_TRANSER_CP450_FW | TTGGCAAATCCCAGATTTGGCTTTGATTTTGGCATCGGTTCGGTTCTTTCAAATATCTTCGAGCGACCTCATGCTATACCTG |
| PR_YNP359 | SC_60BP_XII-1_TRANSER_CP450_RV | AGAAGTGGCTTGTAAAATTTATTATTACAGTCACTCAGACAGAGCACTAAACTGAACTAGATTAAGGGTTCTCGAGAGCTCG |
| PR_YNP394 | PCH_MONOCILLIN_SC50TEF1_G1_F1_FW | TTGCTCATTAGAAAGAAAGCATAGCAATCTAATCTAAGTTTTAATTACAAATGCCCTCTGCAACTGCC |
| PR_YNP395 | PCH_MONOCILLIN_G1_F1_50F2_RV | AACTCCAGAATCTCGAGATTTGGCCGTTGGTGTATGGCCAAGGAGATAAACTGGATGAGCTGATCGTTTGAAG |
| PR_YNP396 | PCH_MONOCILLIN_G1_F2_FW | TTTATCTCCTTGGCCATACACC |
| PR_YNP397 | PCH_MONOCILLIN_G1_F2_RV | TCTTCTTTGCAATCTGCACCG |
| PR_YNP398 | PCH_MONOCILLIN_SC50TEF1_G2_FW | TTGCTCATTAGAAAGAAAGCATAGCAATCTAATCTAAGTTTTAATTACAAATGAAGTCGCATACTTCGGCTG |
| PR_YNP399 | PCH_MONOCILLIN_SC50CYC1_G2_RV | GGACCTAGACTTCAGGTTGTCTAACTCCTTCCTTTTCGGTTAGAGCGGATTCATCGCCCAAAGTGCTCAA |
| PR_YNP400 | SC_pTEF1_RV | TTGTAATTAAAACTTAGATTAGATTGCTATG |
| PR_YNP401 | SC_tCYC1_MONOCILLIN_G1_FW | TCTTGGCGCTATGCCGATGGAGCAGTTTGCGGTGCAGATTGCAAAGAAGATTGTGGGATATTCGTAGATCCGCTCTAACCGAAAAGGAAG |
| PR_YNP402 | SC_tCYC1_FW | ATCCGCTCTAACCGAAAAGGAAG |
| PR_YNP433 | EX_pPKS1_RV | AGGACTTAAUGTTGCTGGGTGATGAGTCGAC |
| PR_YNP434 | EX_tPKS1_FW | AGGCATTAAUAGGACGAGCGACCACATTTTC |
| PR_YNP435 | EX_lim_phs1_up_rv | AGGACTTAAUTGCACTTATTGATAGATAGACTACCCTTATTG |
| PR_YNP436 | EX_lim_phs1_dw_fw | AGGCATTAAUCAGGTCAACAAGGTTGGGAATC |
| PR_YNP437 | EX_vis_phs1_up_rv | AGGACTTAAUCAGGTCAACAAGGTTGGGAATC |
| PR_YNP438 | EX_vis_phs1_dw_fw | AGGCATTAAUTGCACTTATTGATAGATAGACTACCCTTATTG |
| PR_YNP439 | KP_pPKS1_RV | AGGACTTAAUAGTGAAATGTGAATGAGTGTCGAC |
| PR_YNP440 | KP_tPKS1_FW | AGGCATTAAUGCAACCACACGAACCTACTCAC |
| PR_YNP441 | KP_phs1_up_rv | AGGACTTAAUGATGTGCAGACGTCTACGCG |
| PR_YNP442 | KP_phs1_dw_fw | AGGCATTAAUATCTGCGTCTAACGGCTCTCG |
| PR_YNP447 | MONOCILLIN_G1_FW | ATTAAGTCCUCAGCATGCCCTCTGCAACTGCC |
| PR_YNP448 | MONOCILLIN_G1_RV | ATTAATGCCUCAGCCTACGAATATCCCACAATCTTCTTTG |
| PR_YNP452 | EX_60BP_PKS1_YWA1_RV | AAAGTTCTACATCCGCTTCTATCAGGTATCTCGTAGCATGAAAATGTGGTCGCTCGTCCTCTAATTGTCCAAGGCCCGAG |
| PR_YNP456 | KP_60BP_PKS1_YWA1_RV | AGTAGTTGATCCAGACAACACCATGATATGCCAGTCAAGTGAGTAGGTTCGTGTGGTTGCCTAATTGTCCAAGGCCCGAG |
| PR_YNP465 | Anid_TEF1_MONOCILLIN_FW | ATTAAGTCCUCGAGACAGCAGAATCACCGC |
| PR_YNP466 | Anid_TEF1_MONOCILLIN_RV | ATGGTGAAGGUTGTGTTATGTTTTGTG |
| PR_YNP467 | MONOCILLIN_G2_CORRECTED_FW | ACCTTCACCAUGAAGTCGCATACTTCGGCTG |
| PR_YNP468 | MONOCILLIN_G2_CORRECTED_RV | AAATCATCAUCGCCCAAAGTGCTCA |
| PR_YNP469 | Anid_TrpC_MONOCILLIN_FW | ATGATGATTUAATAGCTCCATGTCAACAAG |
| PR_YNP470 | Anid_TrpC_MONOCILLIN_RV | ATTAATGCCUAACAAGTGTACCTGTGCATTCTGG |
| PR_YNP471 | EX_60BP_PKS1_YWA1_FW | TATTTCTCCCCCTCGTTAAGCAACGCTCGTTGGAAGTTCGTCGACTCATCACCCAGCAACATGGAGGTATTCGTTTTTGGGG |
| PR_YNP472 | KP_60BP_PKS1_YWA1_FW | TGTTTTTCTGCTCGTTAAGAACCGCACCCGAAGTACGTCGACACTCATTCACATTTCACTATGGAGGTATTCGTTTTTGGGG |
| PR_YNP480 | SC_60BP_X2_MONOCILLIN_G1_CORRECTED_FW | ATATTAAGTAAATTGCCTCCATTTCTTTTTCCTCGGGCAGAGAAACTCGCAGGCAACTTGTAAGAGCTCGCACACACCATAG |
| PR_YNP481 | SC_60BP_X2_MONOCILLIN_G1_CORRECTED_RV | GCGGAGGAATAGTATGATAAATCTTCAGCATAGATGGGTAACGGGATCCCTCTGTGAGGGGATCTTCGAGCGTCCCAAAAC |
| PR_YNP482 | SC_60BP_XII-1_MONOCILLIN_G2_CORRECTED_FW | TTGGCAAATCCCAGATTTGGCTTTGATTTTGGCATCGGTTCGGTTCTTTCAAATATCTTCTAAGAGCTCGCACACACCATAG |
| PR_YNP483 | SC_60BP_XII-1_MONOCILLIN_G2_CORRECTED_RV | AGAAGTGGCTTGTAAAATTTATTATTACAGTCACTCAGACAGAGCACTAAACTGAACTAGGATCTTCGAGCGTCCCAAAAC |
| PR_YNP489 | EX_90bp_PKS1_del | TTAAGCAACGCTCGTTGGAAGTTCGTCGACTCATCACCCAGCAACAGGACGAGCGACCACATTTTCATGCTACGAGATACCTGATAGAAG |
| PR_YNP490 | KP_90bp_PKS1_del | TAAGAACCGCACCCGAAGTACGTCGACACTCATTCACATTTCACTGCAACCACACGAACCTACTCACTTGACTGGCATATCATGGTGTTG |
| PR_YNP491 | ELIM_90bp_PHS1_del | AACGGGATATCTTGACGGAAGAAGATTCCCAACCTTGTTGACCTGTGCACTTATTGATAGATAGACTACCCTTATTGGTGTTCCTGAAGT |
| PR_YNP492 | EVIS_90bp_PHS1_del | AACGGGATATCTTGACGGAAAAAGATTCCCAACCTTGTTGACCTGTGCACTTATTGATAGATAGACTACCCTTATTGGTGTTCCTGAAGT |
| PR_YNP493 | KP_90bp_PHS1_del | TTGATTTCGCGTAGACGTCTGCACATCAACTTGCGCATCGCGATCATCTGCGTCTAACGGCTCTCGACTTCTGCTTGTGTAGCGGGCCTT |
| PR_YNP507 | FIX-NONFIX_ER_FW | CTCTAGCCATTCAACTACTCAAGG |
| PR_YNP508 | FIX_CYP_RV | TCGAGATATAGCGCTGCGTAC |
| PR_YNP509 | NONFIX_CYP_RV | CGCTCTACTTCAATCTCCTTCC |

**Supplementary table 12.** PCR reactions

| **PCR#** | **PR_FW** | **PR_RV** | **TEMPLATE** | **PRODUCT SIZE** | **PRODUCT** |
| --- | --- | --- | --- | --- | --- |
| 44 | PR_YNP121 | PR_YNP122 | *E. viscosa* JF 03-4F gDNA | 1.6Kb | *E. viscosa* JF 03-4F_PKS1_1.5KB_UP |
| 45 | PR_YNP123 | PR_YNP124 | *E. viscosa* JF 03-4F gDNA | 1.6Kb | *E. viscosa* JF 03-4F_PKS1_1.5KB_DW |
| 46 | PR_YNP125 | PR_YNP126 | *E. viscosa* JF 03-3F gDNA | 1.6Kb | *E. viscosa* JF 03-3F_PKS1_1.5KB_UP |
| 47 | PR_YNP127 | PR_YNP128 | *E. viscosa* JF 03-3F gDNA | 1.55Kb | *E. viscosa* JF 03-3F_PKS1_1.5KB_DW |
| 48 | PR_YNP129 | PR_YNP130 | *K. petricola* gDNA | 1.55Kb | *K. petricola*_PKS1_1.5KB_UP |
| 49 | PR_YNP131 | PR_YNP132 | *K. petricola* gDNA | 1.55Kb | *K. petricola*_PKS1_1.5KB_DW |
| 62 | PR_YNP171 | PR_YNP172 | pYNP121 | 6.2Kb | 60bp_6MSA_*S. cerevisiae*_ISX-2 |
| 63 | PR_YNP135 | PR_YNP178 | pFC334 | 0.536Kb | *K. petricola*_KU70_HH_sgRNA1_FW |
| 64 | PR_YNP177 | PR_YNP136 | pFC334 | 0.4Kb | *K. petricola*_KU70_HH_sgRNA1_RV |
| 67 | PR_YNP135 | PR_YNP182 | pFC334 | 0.536Kb | *E. viscosa*_KU70_HH_sgRNA1_FW |
| 68 | PR_YNP181 | PR_YNP136 | pFC334 | 0.4Kb | *E. viscosa*_KU70_HH_sgRNA1_RV |
| 71 | PR_YNP185 | PR_YNP186 | *K. petricola* gDNA | 1Kb | *K. petricola*_KU70_1KB_UP |
| 72 | PR_YNP187 | PR_YNP188 | *K. petricola* gDNA | 1Kb | *K. petricola*_KU70_1KB_DW |
| 73 | PR_YNP189 | PR_YNP190 | *E. viscosa* JF 03-3F gDNA | 1Kb | *E. viscosa* JF 03-3F_KU70_1KB_UP |
| 74 | PR_YNP191 | PR_YNP192 | *E. viscosa* JF 03-3F gDNA | 1Kb | *E. viscosa* JF 03-3F_KU70_1KB_DW |
| 75 | PR_YNP193 | PR_YNP194 | *E. viscosa* JF 03-4F gDNA | 1Kb | *E. viscosa* JF 03-4F _KU70_1KB_UP |
| 76 | PR_YNP195 | PR_YNP196 | *E. viscosa* JF 03-4F gDNA | 1Kb | *E. viscosa* JF 03-4F _KU70_1KB_UP |
| 77 | PR_YNP204 | PR_YNP205 | pYNP19 | 6.9Kb | atX6MSA_AORY_OPT |
| 81 | PR_YNP213 | PR_YNP217 | pFC902 | 0.568Kb | AFU3P_EX_PKS1_SGRNA |
| 82 | PR_YNP216 | PR_YNP214 | pFC902 | 0.4Kb | *E. viscosa*_PKS1_SGRNA_FW_AFU3T |
| 83 | PR_YNP216 | PR_YNP219 | pFC902 | 0.171Kb | *E. viscosa*_PKS1_SGRNA_FW_PHS1_SGRNA_1 |
| 84 | PR_YNP244 | PR_YNP214 | pFC902 | 0.4Kb | *E. viscosa*_PHS1_SGRNA_1_FW_AFU3T |
| 87 | PR_YNP213 | PR_YNP223 | pFC902 | 0.568Kb | AFU3P_KP_PKS1_SGRNA |
| 88 | PR_YNP222 | PR_YNP214 | pFC902 | 0.4Kb | *K. petricola*_PKS1_SGRNA_FW_AFU3T |
| 89 | PR_YNP222 | PR_YNP225 | pFC902 | 0.171Kb | *K. petricola*_PKS1_SGRNA_FW_PHS1_SGRNA_1 |
| 90 | PR_YNP224 | PR_YNP214 | pFC902 | 0.4Kb | KP_PHS1_SGRNA_1_FW_AFU3T |
| 103 | PR_YNP253 | PR_YNP254 | *E. viscosa* JF 03-3F gDNA | 1.5Kb | *E. viscosa* JF 03-3F_PHS1_1.5KB_UP |
| 104 | PR_YNP255 | PR_YNP256 | *E. viscosa* JF 03-3F gDNA | 1.5Kb | *E. viscosa* JF 03-3F_PHS1_1.5KB_DW |
| 105 | PR_YNP259 | PR_YNP260 | *E. viscosa* JF 03-4F gDNA | 1.5Kb | *E. viscosa* JF 03-4F_PHS1_1.5KB_UP |
| 106 | PR_YNP261 | PR_YNP262 | *E. viscosa* JF 03-4F gDNA | 1.5Kb | *E. viscosa* JF 03-4F_PHS1_1.5KB_DW |
| 107 | PR_YNP263 | PR_YNP264 | *K. petricola* gDNA | 1.5Kb | *K. petricola* _PHS1_1.5KB_UP |
| 108 | PR_YNP265 | PR_YNP266 | *K. petricola* gDNA | 1.5Kb | *K. petricola* _PHS1_1.5KB_DW |
| 109 | PR_YNP281 | PR_YNP282 | pYNP20 | 3.3Kb | *C. militaris* AdnE3- Anid_tTpkiA |
| 110 | PR_YNP306 | PR_YNP296 | pDIV652 | 3.2Kb | Anid_pTEF1-Anid_pgpdA |
| 114 | PR_YNP286 | PR_YNP289 | *C. militaris D1.* gDNA | 3.3Kb | *C. militaris D1.* AdnE1_F2 |
| 115 | PR_YNP290 | PR_YNP293 | *C. militaris D1.* gDNA | 8Kb | *C. militaris D1.* AdnE1_F3 |
| 116 | PR_YNP307 | PR_YNP308 | pYNP21 | 2Kb | *C. militaris* AdnE2- Anid_tArgB |
| 117 | PR_YNP284 | PR_YNP285 | *C. militaris D1.* gDNA | 1.3Kb | *C. militaris D1.* AdnE1_F1 |
| 122 | PR_YNP294 | PR_YNP295 | pYNP121 | 6.3Kb | Sc_pTEF1_2um_Sc_tCYC1 |
| 129 | PR_YNP317 | PR_YNP318 | pYNP78 | 13Kb | *C. militaris D1.* AdnE1 |
| 130 | PR_YNP319 | PR_YNP320 | *E. viscosa* JF 03-4F gDNA | 1Kb | *E. viscosa* JF 03-4F_PKS1_1KB_UP |
| 131 | PR_YNP321 | PR_YNP322 | *E. viscosa* JF 03-4F gDNA | 1Kb | *E. viscosa* JF 03-4F_PKS1_1KB_DW |
| 132 | PR_YNP323 | PR_YNP324 | *E. viscosa* JF 03-3F gDNA | 1Kb | *E. viscosa* JF 03-3F_PKS1_1KB_UP |
| 133 | PR_YNP325 | PR_YNP326 | *E. viscosa* JF 03-3F gDNA | 1Kb | *E. viscosa* JF 03-3F_PKS1_1KB_DW |
| 134 | PR_YNP327 | PR_YNP328 | *K. petricola* gDNA | 1Kb | *K. petricola*_PKS1_1KB_UP |
| 135 | PR_YNP329 | PR_YNP330 | *K. petricola* gDNA | 1Kb | *K. petricola*_PKS1_1KB_DW |
| 142 | PR_YNP342 | PR_YNP343 | plasmid andreas | 4.9Kb | Sc_tTEF1-Sc_tADH1 |
| 143 | PR_YNP344 | PR_YNP345 | pYNP79 | 2.7Kb | AdnE3 |
| 144 | PR_YNP346 | PR_YNP347 | PYNP79 | 1.6Kb | AdnE2 |
| 145 | PR_YNP348 | PR_YNP349 | pCFB2909 | 1.7Kb | Sc_pTDH3-Sc_PGK1 |
| 146 | PR_YNP171 | PR_YNP297 | pYNP78 | 13.3Kb | 60bp_Sc_ISX-2_AdnE1 |
| 147 | PR_YNP358 | PR_YNP359 | pYNP88 | 6.5Kb | 60bp_Sc_ISXII-1-AdnE2-AdnE3 |
| 168 | PR_YNP394 | PR_YNP395 | *P. chamydosporia* gDNA | 4Kb | PchI_F1 |
| 169 | PR_YNP396 | PR_YNP397 | *P. chamydosporia* gDNA | 3.3Kb | PchI_F2 |
| 170 | PR_YNP398 | PR_YNP399 | *P. chamydosporia* gDNA | 6.4Kb | PchE |
| 171 | PR_YNP400 | PR_YNP401 | pYNP78 | 6.3Kb | pYNP78 backbone |
| 183 | PR_YNP400 | PR_YNP402 | pYNP78 | 6.3Kb | pYNP78 backbone |
| 184 | PR_YNP480 | PR_YNP481 | pYNP98 | 8Kb | 60bp_Sc_ISX-2_PchI |
| 185 | PR_YNP482 | PR_YNP483 | pYNP99 | 7Kb | 60bp_Sc_ISXII-1_PchE |
| 186 | PR_YNP433 | PR_YNP434 | pYNP84 | 5Kb | PYNP84 BACKBONE |
| 187 | PR_YNP433 | PR_YNP434 | pYNP85 | 5Kb | PYNP85 BACKBONE |
| 188 | PR_YNP435 | PR_YNP436 | pYNP81 | 6Kb | PYNP81 BACKBONE |
| 189 | PR_YNP437 | PR_YNP438 | pYNP80 | 6Kb | PYNP80 BACKBONE |
| 190 | PR_YNP439 | PR_YNP440 | pYNP86 | 5Kb | PYNP86 BACKBONE |
| 191 | PR_YNP441 | PR_YNP442 | pYNP82 | 6Kb | PYNP82 BACKBONE |
| 194 | PR_YNP447 | PR_YNP448 | pYNP98 | 7.2Kb | PchI |
| 196 | PR_YNP471 | PR_YNP452 | pYNP100 | 6.4Kb | EX_60bp_PKS1_YWA1 |
| 197 | PR_YNP472 | PR_YNP456 | pYNP100 | 6.4Kb | KP_60bp_PKS1_YWA1 |
| 202 | PR_YNP465 | PR_YNP466 | pYNP59 | 0.9Kb | Anid_pTEF1 |
| 203 | PR_YNP467 | PR_YNP468 | pYNP99 | 6.3Kb | PchE |
| 204 | PR_YNP469 | PR_YNP470 | pYNP59 | 0.6Kb | Anid_tTrpC |
| 217 | PR_YNP507 | PR_YNP509 | FIX_ER_SYNTHETIC_DNA | 3.6Kb | FIX ER |
| 218 | PR_YNP507 | PR_YNP508 | FIX_CYP_SYNTHETIC_DNA | 3.6Kb | FIX CYP450 |
| 219 | PR_YNP507 | PR_YNP509 | FIX_NON_SYNTHETIC_DNA | 3.6Kb | FIX NON |
| 220 | PR_YNP507 | PR_YNP508 | FIX_BOTH_SYNTHETIC_DNA | 3.6Kb | FIX BOTH |

**Supplementary Table 13.** Cloning reactions

| **CLONING ID** | **F1** | **F2** | **F3** | **BACKBONE** | **RESULTING PLASMID** |
| --- | --- | --- | --- | --- | --- |
| CLO_38 | PCR63 | PCR64 |  | pFC332 | pYNP52 |
| CLO_40 | PCR67 | PCR68 |  | pFC332 | pYNP54 |
| CLO_46 | PCR81 | PCR82 |  | pFC332 | pYNP63 |
| CLO_47 | PCR81 | PCR83 | PCR84 | pFC332 | pYNP64 |
| CLO_49 | PCR87 | PCR88 |  | pFC332 | pYNP66 |
| CLO_50 | PCR87 | PCR89 | PCR90 | pFC332 | pYNP67 |
| CLO_42 | PCR71 | PCR72 |  | pAC125 | pYNP56 |
| CLO_43 | PCR73 | PCR74 |  | pAC125 | pYNP57 |
| CLO_44 | PCR75 | PCR76 |  | pAC125 | pYNP58 |
| CLO_45 | PCR77 |  |  | pAC125 | pYNP59 |
| CLO_53 | PCR44 | PCR45 |  | PYNP59 | pYNP70 |
| CLO_54 | PCR46 | PCR47 |  | pYNP59 | pYNP71 |
| CLO_55 | PCR48 | PCR49 |  | pYNP59 | pYNP72 |
| CLO_61 | PCR117 | PCR114 | PCR115 | PCR122 | pYNP78 |
| CLO_62 | PCR109 | PCR110 | PCR116 | pAC125 | pYNP79 |
| CLO_63 | PCR103 | PCR104 |  | pYNP79 | pYNP80 |
| CLO_64 | PCR105 | PCR106 |  | pYNP79 | pYNP81 |
| CLO_65 | PCR107 | PCR108 |  | pYNP79 | pYNP82 |
| CLO_66 | PCR129 |  |  | pAC125 | pYNP83 |
| CLO_67 | PCR130 | PCR131 |  | pYNP83 | pYNP84 |
| CLO_68 | PCR132 | PCR133 |  | pYNP83 | pYNP85 |
| CLO_69 | PCR134 | PCR135 |  | pYNP83 | pYNP86 |
| CLO_71 | PCR143 | PCR144 | PCR145 | PCR142 | pYNP88 |
| CLO_81 | PCR168 | PCR169 | PCR171 | pYNP78 | pYNP98 |
| CLO_82 | PCR170 | PCR183 |  | pYNP78 | pYNP99 |
| CLO_85 | PCR194 |  |  | PCR186 | pYNP102 |
| CLO_86 | PCR194 |  |  | PCR187 | pYNP103 |
| CLO_87 | PCR203 | PCR204 | PCR202 | PCR188 | pYNP104 |
| CLO_88 | PCR203 | PCR204 | PCR202 | PCR189 | pYNP105 |
| CLO_89 | PCR194 |  |  | PCR190 | pYNP106 |
| CLO_90 | PCR203 | PCR204 | PCR202 | PCR191 | pYNP107 |
| CLO_100 | PCR215 | PCR216 |  | pFC332 | pYNP118 |

**Supplementary table 14.** Plasmids used in this work

| **pYNPID** | **PLASMID DESCRIPTION** | **PURPOSE** | **REFERENCE** |
| --- | --- | --- | --- |
| pAC125 | Backbone vector with USER cloning cassette (PacI/Nt.BbvCI) AmpR marker | General cloning | 14 |
| pFC332 | AMA1 plasmid with Aspergillus optimized Cas9 and hph selection marker | Cloning of sgRNA | 15 |
| pFC334 | AMA1 plasmid with Aspergillus optimized Cas9, argB selection marker and yA specific sgRNA expressed with ribozymes | Amplification of sgRNAs | 15 |
| pFC902 | The vector has a U3 promoter and terminator controlled gene encoding a transcript containing the sgRNA flanked by a tRNA-Gly repeat; and a gene encoding cas9 controlled by Ptef1 and Ttef1 | Amplification of sgRNAs | 1 |
| pDIV652 | Plasmid containing *A. nidulans* PgpdA and pTEF1 promoters | Template for *A. nidulans* promoters amplification | U.H.M lab |
| pCFB2909-BIK1 | Plasmid containing *S. cerevisiae* pTDH3 and pgkA promoters, and tADH1 and TEF1 terminators | Template for *S. cerevisiae* promoters and plasmid backbone | U.H.M lab |
| pYNP20 | Plasmid containing ADNE3 coding sequence and tTpkiA terminator | Template of ADNE3 | This work |
| pYNP21 | Plasmid containing ADNE2 coding sequence and tArgB terminator | Template of ADNE2 | This work |
| pYNP52 | Cas9-sgRNA vector | Targets *K. petricola KU70* | This work |
| pYNP54 | Cas9-sgRNA vector | Targets *E. viscosa KU70* | This work |
| pYNP56 | DONR_KP_KU70_DEL_XBAI | Integrative plasmid with ~500bp overhangs into *K. petricola KU70* | This work |
| pYNP57 | DONR_EVJ3_KU70_DEL_XBAI | Integrative plasmid with ~500bp overhangs into *E. viscosa* JF 03-3F *KU70* | This work |
| pYNP58 | DONR_EVJ4_KU70_DEL_XBAI | Integrative plasmid with ~500bp overhangs into *E. viscosa* JF 03-4F *KU70* | This work |
| pYNP59 | Plasmid expressing 6MSA flanked with USER cloning sites | Vector for cloning upstream and downstream homologous sequences | This work |
| pYNP63 | Cas9-sgRNA vector | Targets *E. viscosa PKS1* | This work |
| pYNP64 | Multiplex Cas9-sgRNA vector | Targets *E. viscosa PKS1*-*PHS1* | This work |
| pYNP66 | Cas9-sgRNA vector | Targets *K. petricola PKS1* | This work |
| pYNP67 | Multiplex Cas9-sgRNA vector | Targets *K. petricola PKS1-PHS1* | This work |
| pYNP70 | DONR_EVJ4_PKS1_ATX6MSAORYOPT | Integrative plasmid with ~1.5Kb overhangs into *E. viscosa* JF 03-4F *PKS1* | This work |
| pYNP71 | DONR_EVJ3_PKS1_ATX6MSAORYOPT | Integrative plasmid with ~1.5Kb overhangs into *E. viscosa* JF 03-3F *PKS1* | This work |
| pYNP72 | DONR_KP_PKS1_ATX6MSAORYOPT | Integrative plasmid with ~1.5Kb overhangs into *K. petricola* *PKS1* | This work |
| pYNP78 | Plasmid expressing ADNE1 | Vector for heterologous expression of AdnE1 in *S. cerevisiae* | This work |
| pYNP79 | Plasmid expressing ADNE2-ADNE3 flanked with USER cloning sites | Vector for cloning upstream and downstream homologous sequences | This work |
| pYNP80 | DONR_EVJ3_PHS1_ADNE2-ADNE3 | Integrative plasmid with ~1.5Kb overhangs into *E. viscosa* JF 03-3F *PHS1* | This work |
| pYNP81 | DONR_EVJ4_PHS1_ADNE2-ADNE3 | Integrative plasmid with ~1.5Kb overhangs into *E. viscosa* JF 03-4F *PHS1* | This work |
| pYNP82 | DONR_KP_PHS1_ADNE2-ADNE3 | Integrative plasmid with ~1.5Kb overhangs into *K. petricola* *PHS1* | This work |
| pYNP83 | Plasmid containing ADNE1 coding sequence flanked with USER cloning sites | Vector for cloning upstream and downstream homologous sequences | This work |
| pYNP84 | DONR_EVJ4_PKS1_ADNE1 | Integrative plasmid with ~1Kb overhangs into *E. viscosa* JF 03-4F *PKS1* | This work |
| pYNP85 | DONR_EVJ3_PKS1_ADNE1 | Integrative plasmid with ~1Kb overhangs into *E. viscosa* JF 03-3F *PKS1* | This work |
| pYNP86 | DONR_KP_PKS1_ADNE1 | Integrative plasmid with ~1Kb overhangs into *K. petricola* *PKS1* | This work |
| pYNP88 | Plasmid expressing ADNE2-ADNE3 | Vector for heterologous expression of AdnE2-AdnE3 in *S. cerevisiae* | This work |
| pYNP98 | Plasmid expressing PchI | Vector for heterologous expression of PchI in *S. cerevisiae* | This work |
| pYNP99 | Plasmid expressing PchE | Vector for heterologous expression of PchE in *S. cerevisiae* | This work |
| pYNP100 | Plasmid expressing YWA1 | Vector for heterologous expression of YWA1 in *S. cerevisiae* | This work |
| pYNP102 | DONR_EVJ4_PKS1_PCHI | Integrative plasmid with ~1Kb overhangs into *E. viscosa* JF 03-4F *PKS1* | This work |
| pYNP103 | DONR_EVJ3_PKS1_PCHI | Integrative plasmid with ~1Kb overhangs into *E. viscosa* JF 03-3F *PKS1* | This work |
| pYNP104 | DONR_EVJ4_PHS1_PCHE | Integrative plasmid with ~1.5Kb overhangs into *E. viscosa* JF 03-4F *PHS1* | This work |
| pYNP105 | DONR_EVJ3_PHS1_PCHE | Integrative plasmid with ~1.5Kb overhangs into *E. viscosa* JF 03-3F *PHS1* | This work |
| pYNP106 | DONR_KP_PKS1_PCHI | Integrative plasmid with ~1Kb overhangs into *K. petricola* *PKS1* | This work |
| pYNP107 | DONR_KP_PHS1_PCHE | Integrative plasmid with ~1.5Kb overhangs into *K. petricola* *PHS1* | This work |
| pYNP118 | Cas9-sgRNA vector | Targets AdnE3 | This work |
| pYNP119 | Cas9-sgRNA vector | Targets ISX-2 | This work |
| pYNP120 | Multiplex Cas9-sgRNA vector | Targets ISX-2 and ISXII-1 | This work |
| pYNP121 | Plasmid expressing 6MSA | Vector for heterologous expression of 6MSA in *S. cerevisiae* | This work |

**Supplementary table 15.** Protospacers used in this work

| **PLASMID** | **PROTOSPACER** | **REFERENCE** |
| --- | --- | --- |
| pYNP52 | CGACGAGTCCGGCTACAAGC | This work |
| pYNP54 | CGTCCGGTTCATCCTTCGAT | This work |
| pYNP63 | CGCATCCGCCGATTCACTGA | This work |
| pYNP64 | CCGTCTCATACACTATCCCA | This work |
| pYNP66 | CTACGTGTTCGGTGACCAAA | 16 |
| pYNP67 | CGGTGCAGCTTATCCGCCTG | 16 |
| pYNP118 | CTCTTGCTCGAGGTGCAATT | This work |
| pYNP119 | CTCTCGAAGTGGTCACGTGC | 17 |
| pYNP120 | GGTATGTGCAGTTGATTCAC | 17 |

**References:**

1. Nødvig, C. S. *et al.* Efficient oligo nucleotide mediated CRISPR-Cas9 gene editing in Aspergilli. *Fungal Genet. Biol.* **115**, 78–89 (2018).

2. Nielsen, J. B., Nielsen, M. L. & Mortensen, U. H. Transient disruption of non-homologous end-joining facilitates targeted genome manipulations in the filamentous fungus *Aspergillus nidulans*. *Fungal Genet. Biol.* **45**, 165–170 (2008).

3. Aspergillus nidulans FGSC A4 genome assembly ASM1142v1. *NCBI* https://www.ncbi.nlm.nih.gov/datasets/genome/GCF_000011425.1/.

4. Andersen, M. R. *et al.* Comparative genomics of citric-acid-producing Aspergillus niger ATCC 1015 versus enzyme-producing CBS 513.88. *Genome Res.* **21**, 885–897 (2011).

5. Jarczynska, Z. D. *et al.* DIVERSIFY: A Fungal Multispecies Gene Expression Platform. *ACS Synth. Biol.* **10**, 579–588 (2021).

6. Aspergillus oryzae RIB40 genome assembly ASM18445v3. *NCBI* https://www.ncbi.nlm.nih.gov/datasets/genome/GCF_000184455.2/.

7. Carr, E. C. *et al.* Characterization of a novel polyextremotolerant fungus, Exophiala viscosa, with insights into its melanin regulation and ecological niche. *G3 GenesGenomesGenetics* **13**, jkad110 (2023).

8. Cellular responses of microcolonial rock fungi to long-term desic...: Ingenta Connect. https://www.ingentaconnect.com/content/wfbi/sim/2008/00000061/00000001/art00012;jsessionid=ge0mmj5t69lpg.x-ic-live-03.

9. Saccharomyces cerevisiae S288C genome assembly R64. *NCBI* https://www.ncbi.nlm.nih.gov/datasets/genome/GCF_000146045.2/.

10. Entian, K.-D. & Kötter, P. 25 Yeast Genetic Strain and Plasmid Collections. in *Methods in Microbiology* (eds. Stansfield, I. & Stark, M. J.) vol. 36 629–666 (Academic Press, 2007).

11. Mans, R. *et al.* CRISPR/Cas9: a molecular Swiss army knife for simultaneous introduction of multiple genetic modifications in Saccharomyces cerevisiae. *FEMS Yeast Res.* **15**, fov004 (2015).

12. Jones, E. W. [31] Tackling the protease problem in *Saccharomyces cerevisiae*. in *Methods in Enzymology* vol. 194 428–453 (Academic Press, 1991).

13. Ma, S. M. *et al.* Complete Reconstitution of a Highly Reducing Iterative Polyketide Synthase. *Science* **326**, 589–592 (2009).

14. Versatile Enzyme Expression and Characterization System for Aspergillus nidulans, with the Penicillium brevicompactum Polyketide Synthase Gene from the Mycophenolic Acid Gene Cluster as a Test Case | Applied and Environmental Microbiology. https://journals.asm.org/doi/10.1128/aem.01768-10.

15. Nødvig, C. S., Nielsen, J. B., Kogle, M. E. & Mortensen, U. H. A CRISPR-Cas9 System for Genetic Engineering of Filamentous Fungi. *PloS One* **10**, e0133085 (2015).

16. Voigt, O. *et al.* An advanced genetic toolkit for exploring the biology of the rock-inhabiting black fungus Knufia petricola. *Sci. Rep.* **10**, 22021 (2020).

17. Li, X. *et al.* Metabolic network remodelling enhances yeast’s fitness on xylose using aerobic glycolysis. *Nat. Catal.* **4**, 783–796 (2021).
