# Supplementary material for: Black yeasts are efficient heterologous hosts of a wide range of fungal polyketides
Source: Research Square preprint supplement (doi:10.21203/rs.3.rs-6001933/v1), 2025-02-20
Supplement: Supplementary file 3 [file d91d3f36885bd9319e3e11d5.xlsx]

## Sheet: Genomes
Supplementary file 1. List of genomes representative of 15 fungal classes
Class	Genome	Accesion number
Agaricomycetes	Coprinopsis cinerea okayama7#130	GCA_000182895.1
Agaricomycetes	Russula aff. farinipes	GCA_964199335.1
Agaricomycetes	Ganoderma resinaceum	GCA_964023195.1
Agaricomycetes	Ganoderma resinaceum	GCA_964023155.1
Agaricomycetes	Russula olivacea	GCA_963926505.1
Agaricomycetes	Volvariella surrecta	GCA_951802405.1
Agaricomycetes	Volvariella surrecta	GCA_951802395.1
Agaricomycetes	Coprinellus micaceus	GCA_951394415.1
Agaricomycetes	Coprinellus micaceus	GCA_951394405.1
Agaricomycetes	Pleurotus ostreatus	GCA_947034855.1
Agaricomycetes	Flammulina velutipes	GCA_945909995.2
Agaricomycetes	Clitopilus passeckerianus	GCA_944990035.1
Agaricomycetes	Laetiporus sulphureus	GCA_927399535.3
Agaricomycetes	Laetiporus sulphureus	GCA_927399515.3
Agaricomycetes	Flammulina filiformis Dan3	GCA_041682555.1
Agaricomycetes	Grifola frondosa SiL91	GCA_041464085.1
Agaricomycetes	Agaricus bisporus A10 9	GCA_041430195.1
Agaricomycetes	Psilocybe semilanceata 141588727 JJPSEM M A1 3	GCA_040207485.1
Agaricomycetes	Psilocybe maluti 494175 JJUP M B1 3	GCA_040207425.1
Agaricomycetes	Heterobasidion occidentale DAOMC252864 ecotype Colorado	GCA_039111635.1
Agaricomycetes	Agaricus bisporus A7 31	GCA_037953735.1
Agaricomycetes	Phlebopus portentosus YAF023	GCA_037892935.1
Agaricomycetes	Pleurotus giganteus zhudugu2	GCA_036873075.1
Agaricomycetes	Pleurotus tuoliensis Ptuo s1	GCA_036872985.1
Agaricomycetes	Wolfiporia cocos GDMCC 5.219	GCA_034769205.1
Agaricomycetes	Hericium rajendrae NPCB A08	GCA_033439255.1
Agaricomycetes	Pleurotus pulmonarius CCMSSC 04423	GCA_032158505.1
Agaricomycetes	Pleurotus giganteus PG46	GCA_032158425.1
Agaricomycetes	Trametes hirsuta X 13	GCA_030411785.1
Agaricomycetes	Lentinula edodes HY19	GCA_030246715.1
Agaricomycetes	Lentinula edodes HY7	GCA_030246695.1
Agaricomycetes	Agaricus bitorquis BH01	GCA_030246685.1
Agaricomycetes	Agaricus subrufescens ABL 49	GCA_029945375.1
Agaricomycetes	Pleurotus eryngii var. elaeoselini CCMJ2131	GCA_029874175.1
Agaricomycetes	Pleurotus tuoliensis CCMJ1077 cultivar Tianshang 2 Hao	GCA_029874165.1
Agaricomycetes	Fomitopsis palustris FFPRI 0507 CJ35	GCA_029783445.1
Agaricomycetes	Agaricus blazei JA 15036	GCA_029719445.1
Agaricomycetes	Wolfiporia cocos DCH 776 SS20	GCA_029448655.1
Agaricomycetes	Mycena albidolilacea CBHHK002	GCA_029282495.1
Agaricomycetes	Mycena epipterygia CBHHK145m	GCA_029281465.1
Agaricomycetes	Mycena capillaripes 9286	GCA_029204075.1
Agaricomycetes	Mycena sanguinolenta CBHHK176m	GCA_029203985.1
Agaricomycetes	Lentinula detonsa TFB7810	GCA_027921405.1
Agaricomycetes	Lentinula raphanica INPA1701G ss19	GCA_027919835.1
Agaricomycetes	Pleurotus sapidus DSM 8266	GCA_026743855.1
Agaricomycetes	Ganoderma lingzhi SCIM1006	GCA_026283605.1
Agaricomycetes	Lyophyllum decastes LRG d1 5	GCA_026258425.1
Agaricomycetes	Lyophyllum shimeji AT787	GCA_026008595.1
Agaricomycetes	Lyophyllum decastes LRG d1 1	GCA_025854295.1
Agaricomycetes	Trametes punicea CIRM BRFM 1868	GCA_025528855.1
Agaricomycetes	Pisolithus microcarpus 441	GCA_024613185.1
Agaricomycetes	Schizophyllum commune 20R 7 F01	GCA_024373065.1
Agaricomycetes	Laetiporus sulphureus NWAFU 1	GCA_024321985.1
Agaricomycetes	Ganoderma tsugae CCMJ4178	GCA_024305745.1
Agaricomycetes	Hypsizygus marmoreus FQX MS01 cultivar Haixiangu	GCA_023718595.1
Agaricomycetes	Lepiota brunneoincarnata LH00008	GCA_023014365.1
Agaricomycetes	Galerina sulciceps ZP082096	GCA_023014345.1
Agaricomycetes	Galerina marginata ZP088764	GCA_023014335.1
Agaricomycetes	Trametes meyenii CIRM BRFM 1810	GCA_022606255.1
Agaricomycetes	Trametes maxima CIRM BRFM 1813	GCA_022606215.1
Agaricomycetes	Trametes polyzona CIRM BRFM 1798	GCA_022606195.1
Agaricomycetes	Trametes elegans CIRM BRFM 1122	GCA_022606155.1
Agaricomycetes	Trametes gibbosa CIRM BRFM 1770	GCA_022606055.1
Agaricomycetes	Flammulina filiformis Fv01 N	GCA_022345045.1
Agaricomycetes	Flammulina filiformis Fv01 10	GCA_022345005.1
Agaricomycetes	Agaricus sinodeliciosus ZRL20160001 S65	GCA_022315185.1
Agaricomycetes	Phlebopus sp. FC 14 FC 14	GCA_021018615.1
Agaricomycetes	Ganoderma leucocontextum HMGIM I160015	GCA_020736865.1
Agaricomycetes	Coriolopsis trogii Ct001	GCA_020543535.1
Agaricomycetes	Coriolopsis trogii Ct001	GCA_020543525.1
Agaricomycetes	Phlebopus portentosus PP17026	GCA_020232755.1
Agaricomycetes	Pleurotus tuber regium JN18	GCA_019693315.1
Agaricomycetes	Pleurotus cornucopiae	GCA_019677325.2
Agaricomycetes	Ganoderma lucidum Ling Jian NO.2	GCA_019426095.1
Agaricomycetes	Sparassis latifolia Minxiu No.1	GCA_018466975.1
Agaricomycetes	Boletus reticuloceps BR01	GCA_018397855.1
Agaricomycetes	Psilocybe cubensis MGC MH 2018	GCA_017499595.2
Agaricomycetes	Amauroderma rugosum ACCC 51706	GCA_017499575.1
Agaricomycetes	Pleurotus citrinopileatus HfpriPC05 1 Y1	GCA_017312325.1
Agaricomycetes	Hericium erinaceus 0605	GCA_016906435.1
Agaricomycetes	Coprinopsis cinerea AmutBmut pab1 1 A43mut B43mut pab1 1 #326	GCA_016772295.1
Agaricomycetes	Suillus plorans S12	GCA_016647745.1
Agaricomycetes	Clitopilus hobsonii QYL 10	GCA_015708445.2
Agaricomycetes	Panaeolus papilionaceus CIRM BRFM 715	GCA_015501605.1
Agaricomycetes	Crassisporium funariophilum CBS 144457	GCA_014925845.1
Agaricomycetes	Lyophyllum atratum CBS 144462	GCA_014905825.1
Agaricomycetes	Schizophyllum commune IUM1114 SS01	GCA_014900015.1
Agaricomycetes	Mycena sanguinolenta 160909Yilan	GCA_014462675.1
Agaricomycetes	Mycena venus CCC161011	GCA_014462655.1
Agaricomycetes	Mycena indigotica 171206Taipei	GCA_014461135.1
Agaricomycetes	Mycena kentingensis nom. inval. 111111Pingtung	GCA_014461125.1
Agaricomycetes	Mycena chlorophos 110903Hualien Pintung	GCA_014461115.1
Agaricomycetes	Pleurotus tuber regium ACCC 50657 18	GCA_014058305.1
Agaricomycetes	Hypsizygus marmoreus HM62	GCA_013433165.1
Agaricomycetes	Leucoagaricus leucothites CBS 146.42	GCA_013368445.1
Agaricomycetes	Tricholomella constricta CBS 661.87	GCA_013368375.1
Agaricomycetes	Psilocybe cf. subviscida CBS 101986	GCA_013368295.1
Agaricomycetes	Agrocybe pediades CBS 102.39	GCA_013053245.1
Agaricomycetes	Pleurotus pulmonarius PM ss2	GCA_012980525.1
Agaricomycetes	Pleurotus pulmonarius PM ss13	GCA_012979565.1
Agaricomycetes	Ganoderma lucidum BCRC 36111	GCA_012655175.1
Agaricomycetes	Flammulina velutipes 6 3	GCA_011800155.1
Agaricomycetes	Sparassis latifolia	GCA_009812315.1
Agaricomycetes	Sarcomyxa edulis SE1	GCA_009761415.1
Agaricomycetes	Floccularia luteovirens FLZJUC10	GCA_009739215.1
Agaricomycetes	Trametes sanguinea ACCC51180	GCA_008973685.1
Agaricomycetes	Agaricus bisporus AB58	GCA_008271545.1
Agaricomycetes	Coriolopsis trogii S0301	GCA_007896425.1
Agaricomycetes	Hericium erinaceus CS 4	GCA_006506795.2
Agaricomycetes	Gloeostereum incarnatum CCMJ2665	GCA_004338095.1
Agaricomycetes	Lepiota venenata LJE	GCA_004296355.1
Agaricomycetes	Floccularia luteovirens Y1	GCA_004012055.1
Agaricomycetes	Sparassis crispa	GCA_003851025.1
Agaricomycetes	Pleurotus ostreatus CCMSSC03989	GCA_003313235.2
Agaricomycetes	Pleurotus eryngii JKXB130DA	GCA_003243765.1
Agaricomycetes	Pleurotus tuoliensis JKBL130LB	GCA_003243755.1
Agaricomycetes	Trametes villosa	GCA_002964805.2
Agaricomycetes	Ganoderma boninense G3	GCA_002900995.3
Agaricomycetes	Ganoderma sinense ZZ0214 1 ZZ0214 1	GCA_002760635.1
Agaricomycetes	Pyrrhoderma noxium FFPRI411160	GCA_002287475.2
Agaricomycetes	Pleurotus ostreatus CCMSSC00389	GCA_001956935.2
Agaricomycetes	Phanerodontia chrysosporium ATCC 20696	GCA_001910725.1
Agaricomycetes	Polyporus brumalis kfri 20912	GCA_001792895.1
Agaricomycetes	Pleurotus eryngii 183	GCA_001717165.1
Agaricomycetes	Grifola frondosa 9006 11	GCA_001683735.1
Agaricomycetes	Lentinula edodes B17	GCA_001562095.1
Agaricomycetes	Heterobasidion irregulare	GCA_001458015.1
Agaricomycetes	Heterobasidion annosum	GCA_001457995.1
Agaricomycetes	Heterobasidion annosum	GCA_001457955.1
Agaricomycetes	Heterobasidion irregulare	GCA_001457935.1
Agaricomycetes	Heterobasidion irregulare	GCA_001457915.1
Agaricomycetes	Heterobasidion annosum	GCA_001457895.1
Agaricomycetes	Trametes hirsuta 072	GCA_001302255.2
Agaricomycetes	Hebeloma cylindrosporum h7 h7	GCA_000827355.1
Agaricomycetes	Phlebopus portentosus PP33	GCA_000766925.2
Agaricomycetes	Flammulina velutipes KACC42780 KACC42780	GCA_000633125.1
Agaricomycetes	Volvariella volvacea V23 V23	GCA_000349905.1
Agaricomycetes	Ganoderma lucidum G.260125 1 G.260125 1	GCA_000271565.1
Agaricomycetes	Stereum hirsutum FP 91666 SS1 FP 91666 SS1	GCA_000264905.1
Agaricomycetes	Serpula lacrymans var. lacrymans S7.9 S7.9	GCA_000218685.1
Agaricomycetes	Schizophyllum commune H4 8 H4 8	GCA_000143185.2
Chytridiomycetes	Batrachochytrium dendrobatidis CLFT044	GCA_036783925.1
Chytridiomycetes	Batrachochytrium dendrobatidis CLFT067	GCA_036289345.1
Chytridiomycetes	Batrachochytrium dendrobatidis CLFT071	GCA_029704095.1
Chytridiomycetes	Hyaloraphidium curvatum SAG235 1	GCA_025558095.1
Chytridiomycetes	Gorgonomyces haynaldii MP57	GCA_025526955.1
Chytridiomycetes	Synchytrium microbalum JEL517	GCA_006535985.1
Chytridiomycetes	Batrachochytrium salamandrivorans AMFP13	GCA_002006685.2
Chytridiomycetes	Spizellomyces punctatus DAOM BR117 DAOM BR117	GCA_000182565.2
Dothideomycetes	Cercospora beticola	GCA_963585935.1
Dothideomycetes	Alternaria atra	GCA_907166805.1
Dothideomycetes	Aureobasidium uvarum	GCA_903853725.1
Dothideomycetes	Aureobasidium mustum	GCA_903819665.1
Dothideomycetes	Aureobasidium vineae	GCA_903819635.1
Dothideomycetes	Plenodomus biglobosusLeptosphaeria biglobosa brassicae group	GCA_900465125.1
Dothideomycetes	Neoscytalidium dimidiatum	GCA_900092665.1
Dothideomycetes	Ramularia collo cygni URUG2	GCA_900074925.1
Dothideomycetes	Epicoccum sorghinum NJC07	GCA_040893085.1
Dothideomycetes	Corynespora cassiicola DWZ	GCA_040763265.1
Dothideomycetes	Alternaria conjuncta DAOMC195272	GCA_040584035.1
Dothideomycetes	Alternaria triticina DAOMC238612	GCA_040583995.1
Dothideomycetes	Alternaria oregonensis DAOMC238619	GCA_040583965.1
Dothideomycetes	Alternaria ethzedia DAOMC238797	GCA_040583925.1
Dothideomycetes	Alternaria arbusti DAOMC238834	GCA_040583865.1
Dothideomycetes	Westerdykella dispersa F012	GCA_040333465.1
Dothideomycetes	Bipolaris gigantea	GCA_040113375.1
Dothideomycetes	Laburnicola rhizohalophila JP R2018DY 11A	GCA_039700795.1
Dothideomycetes	Didymella pinodella HNA18	GCA_039634465.1
Dothideomycetes	Ascochyta pisi HNA23	GCA_039634435.1
Dothideomycetes	Phyllosticta capitalensis CBS 117118	GCA_038381155.1
Dothideomycetes	Phyllosticta paracitricarpa CBS 141357	GCA_038381115.1
Dothideomycetes	Phyllosticta citrichinensis CBS 130529	GCA_038380875.1
Dothideomycetes	Phyllosticta citribraziliensis CBS 100098	GCA_038380855.1
Dothideomycetes	Phyllosticta citriasiana CBS 123371	GCA_038021125.1
Dothideomycetes	Neoscytalidium dimidiatum ND8	GCA_037367355.1
Dothideomycetes	Aureobasidium pullulans ATCC 15233	GCA_037367325.1
Dothideomycetes	Bipolaris oryzae Bo 1	GCA_037177745.1
Dothideomycetes	Hortaea werneckii	GCA_037044905.1
Dothideomycetes	Alternaria alstroemeriae LH A124	GCA_037044435.1
Dothideomycetes	Alternaria destruens LH A593	GCA_037044395.1
Dothideomycetes	Cladosporium antarcticum LH A391	GCA_037044025.1
Dothideomycetes	Cladosporium sp. F165 F165 ecotype Palmerston North	GCA_037042895.2
Dothideomycetes	Epicoccum sp. F181 F181 ecotype Palmerston North	GCA_037042865.2
Dothideomycetes	Botryosphaeria sp. S80 01Y S80 01Y	GCA_037042185.1
Dothideomycetes	Alternaria alternarina TB 1129	GCA_036971565.1
Dothideomycetes	Alternaria brassicae BTP	GCA_036768455.1
Dothideomycetes	Bipolaris sp. L1 2 L1 2	GCA_036562085.1
Dothideomycetes	Cladosporium oxysporum AAAS A1	GCA_035771495.1
Dothideomycetes	Zasmidium cellare P124	GCA_035040045.1
Dothideomycetes	Bipolaris maydis BM 1 MG 1	GCA_034642335.1
Dothideomycetes	Lasiodiplodia pseudotheobromae RIFT15092	GCA_033955005.1
Dothideomycetes	Cercospora beticola	GCA_033473495.1
Dothideomycetes	Elsinoe necatrix CMW56134	GCA_032393115.1
Dothideomycetes	Aureobasidium pullulans 16	GCA_031010245.1
Dothideomycetes	Cladosporium sp. BF F	GCA_030463185.1
Dothideomycetes	Westerdykella aurantiaca NNIBRFG27121	GCA_030412805.1
Dothideomycetes	Trametes hirsuta X 13	GCA_030411785.1
Dothideomycetes	Didymella glomerata Pj 2	GCA_030271015.1
Dothideomycetes	Lasiodiplodia iranensis CCTCC M2017288	GCA_030270915.1
Dothideomycetes	Alternaria porri	GCA_029783965.1
Dothideomycetes	Cercospora nicotianae 1110	GCA_029490675.1
Dothideomycetes	Elsinoe perseae TREC ASLL3	GCA_029448695.1
Dothideomycetes	Botryosphaeria dothidea GS.01s2	GCA_029169245.1
Dothideomycetes	Lasiodiplodia theobromae CSS.01s1	GCA_029169125.1
Dothideomycetes	Didymella sp. IMI 355093 IMI 355093	GCA_027946495.1
Dothideomycetes	Didymosphaeria variabile IMI 356815	GCA_027946475.1
Dothideomycetes	Cercospora janseana RL44	GCA_026725115.1
Dothideomycetes	Ascochyta koolunga GRP 15 464	GCA_026547115.1
Dothideomycetes	Bipolaris zeicola LWII	GCA_026367875.1
Dothideomycetes	Curvularia spicifera	GCA_026262435.1
Dothideomycetes	Cladosporium colombiae 601	GCA_026122715.1
Dothideomycetes	Ascochyta koolunga GRP 17 199	GCA_026119525.1
Dothideomycetes	Didymella pinodella GRP 17 128	GCA_026119435.1
Dothideomycetes	Didymella pinodes GRP 11 30	GCA_026119395.1
Dothideomycetes	Didymella pinodes BRC 11 24	GCA_026119245.1
Dothideomycetes	Coniothyrium glycines IMI294986	GCA_025742395.1
Dothideomycetes	Coniothyrium glycines Pg 1	GCA_025742375.1
Dothideomycetes	Epicoccum latusicollum HGUP191049	GCA_025677925.1
Dothideomycetes	Trametes punicea CIRM BRFM 1868	GCA_025528855.1
Dothideomycetes	Plenodomus lindquistii US01	GCA_025504975.1
Dothideomycetes	Alternaria dauci	GCA_025504955.1
Dothideomycetes	Alternaria arborescens DET2035	GCA_025426055.1
Dothideomycetes	Cladosporium velox C4	GCA_024604135.1
Dothideomycetes	Aureobasidium subglaciale EXF 11962	GCA_024244255.1
Dothideomycetes	Aureobasidium subglaciale EXF 12336	GCA_024244225.1
Dothideomycetes	Macrophomina tecta BRIP 70781	GCA_024180945.1
Dothideomycetes	Alternaria incomplexa BMP 0042	GCA_024043165.1
Dothideomycetes	Alternaria arbusti BMP 1465	GCA_024043155.1
Dothideomycetes	Alternaria conjuncta BMP 0040	GCA_024043145.1
Dothideomycetes	Alternaria rosae BMP 2777	GCA_024043135.1
Dothideomycetes	Curvularia clavata yc1106	GCA_023920165.1
Dothideomycetes	Aureobasidium sp. EXF 10728 EXF 10728	GCA_023848605.1
Dothideomycetes	Aureobasidium sp. EXF 10727 EXF 10727	GCA_023848595.1
Dothideomycetes	Alternaria sp. Ai002NY15 Ai002NY15	GCA_023758125.1
Dothideomycetes	Alternaria hordeiaustralica BMP 2776	GCA_023758085.1
Dothideomycetes	Alternaria ventricosa BMP 2768	GCA_023758065.1
Dothideomycetes	Alternaria viburni BMP 2772	GCA_023758015.1
Dothideomycetes	Alternaria sp. BMP 0032 BMP 0032	GCA_023758005.1
Dothideomycetes	Alternaria metachromatica BMP 0045	GCA_023757995.1
Dothideomycetes	Cladosporium cucumerinum C1	GCA_023634325.1
Dothideomycetes	Cercospora zeae maydis LN	GCA_023512815.1
Dothideomycetes	Alternaria alternata Altal1	GCA_023079285.1
Dothideomycetes	Alternaria brassicicola Altbr1	GCA_023079265.1
Dothideomycetes	Venturiaceae sp. KMAF11 KMAF11	GCA_023078705.1
Dothideomycetes	Cercospora sp. J1 LZ 2022 J1 LZ 2022	GCA_022965775.1
Dothideomycetes	Cercospora apii QCYBC	GCA_022836995.1
Dothideomycetes	Cladosporium colombiae FKII L3 CM PAB1	GCA_022814635.1
Dothideomycetes	Alternaria angustiovoidea FKII L2 CM DRAB1	GCA_022814545.1
Dothideomycetes	Alternaria angustiovoidea FKII L8 BK P2B	GCA_022814425.1
Dothideomycetes	Cladosporium austrohemisphaericum FJI L7 BK DG1	GCA_022813715.1
Dothideomycetes	Aaosphaeria pasadenensis FJI L9 BK P1	GCA_022813625.1
Dothideomycetes	Pseudopyrenochaeta terrestris FJII L10 SW DR1	GCA_022813475.1
Dothideomycetes	Cercospora zeina YN	GCA_022702355.1
Dothideomycetes	Hortaea sp. C3G1500 4 C3G1500 4	GCA_022701445.1
Dothideomycetes	Trametes meyenii CIRM BRFM 1810	GCA_022606255.1
Dothideomycetes	Trametes maxima CIRM BRFM 1813	GCA_022606215.1
Dothideomycetes	Trametes polyzona CIRM BRFM 1798	GCA_022606195.1
Dothideomycetes	Trametes gibbosa CIRM BRFM 1770	GCA_022606055.1
Dothideomycetes	Sphaerulina vaccinii Sph NS 01	GCA_022570795.1
Dothideomycetes	Didymella glomerata CBS 528.66	GCA_022559905.1
Dothideomycetes	Curvularia sp. ZM96 ZM96	GCA_022457065.1
Dothideomycetes	Plenodomus biglobosus CA1	GCA_022343325.1
Dothideomycetes	Botryosphaeria dothidea CK28	GCA_021650725.1
Dothideomycetes	Alternaria burnsii HNLF 44	GCA_021613345.1
Dothideomycetes	Diplodia seriata FDS 637	GCA_021436955.3
Dothideomycetes	Cladosporium cucumerinum ccnX2	GCA_021219475.1
Dothideomycetes	Cladosporium tenuissimum A3.I.1	GCA_021018855.1
Dothideomycetes	Aureobasidium mangrovei	GCA_021014315.1
Dothideomycetes	Alternaria arborescens DET2008	GCA_020736785.1
Dothideomycetes	Alternaria rosae MPI PUGE AT 0040	GCA_020736505.1
Dothideomycetes	Alternaria cf. alternata R IC 06 P1	GCA_020284155.1
Dothideomycetes	Aureobasidium melanogenum ATCC 62921	GCA_020231955.1
Dothideomycetes	Aureobasidium leucospermi VS I D KN 2	GCA_019775405.1
Dothideomycetes	Alternaria panax BNCC115425	GCA_019702505.1
Dothideomycetes	Cercospora kikuchii MAFF 305040	GCA_019650295.1
Dothideomycetes	Bipolaris maydis BM1	GCA_019454015.1
Dothideomycetes	Exserohilum rostratum ER1	GCA_019453395.1
Dothideomycetes	Alternaria longipes CBS 540.94	GCA_019059555.1
Dothideomycetes	Cladosporium cladosporioides F8 5S 2F	GCA_018408335.1
Dothideomycetes	Cladosporium cladosporioides F8 5S 3F	GCA_018408295.1
Dothideomycetes	Ampelomyces quisqualis BRIP 72107	GCA_018398575.1
Dothideomycetes	Lasiodiplodia theobromae A20 4	GCA_018153875.1
Dothideomycetes	Alternaria tenuissima ANJ	GCA_017589455.1
Dothideomycetes	Aureobasidium zeae KZ1	GCA_017580825.2
Dothideomycetes	Elsinoe batatas CRI CJ2	GCA_017309325.2
Dothideomycetes	Stagonosporopsis cucurbitacearum DBTL4	GCA_016920805.1
Dothideomycetes	Bipolaris zeicola GZL10	GCA_016906865.1
Dothideomycetes	Corynespora cassiicola CC01	GCA_016906425.1
Dothideomycetes	Aureobasidium melanogenum ATCC 62921	GCA_016807825.1
Dothideomycetes	Stagonosporopsis rhizophila XDPOP RS 16W	GCA_016767195.1
Dothideomycetes	Didymella arachidicola YY187	GCA_016630955.3
Dothideomycetes	Elsinoe australis BRIP 52616 a	GCA_016625675.1
Dothideomycetes	Ascochyta lentis JD202.9	GCA_016097315.1
Dothideomycetes	Ascochyta lentis JD202.22	GCA_016097305.1
Dothideomycetes	Paraphaeosphaeria minitans Conio IMI134523	GCA_015832175.1
Dothideomycetes	Venturia carpophila	GCA_014858625.1
Dothideomycetes	Pyrenophora teres f. maculata	GCA_014334775.1
Dothideomycetes	Exserohilum turcica Et28A Et28A	GCA_013390285.1
Dothideomycetes	Elsinoe arachidis LNFT H01	GCA_013372555.1
Dothideomycetes	Venturia oleaginea Yun35	GCA_013176395.1
Dothideomycetes	Alternaria burnsii CBS107.38	GCA_013036055.1
Dothideomycetes	Sclerotiophoma versabilis	GCA_012274445.1
Dothideomycetes	Curvularia kusanoi 30M1	GCA_011058905.1
Dothideomycetes	Ascochyta rabiei	GCA_011037155.1
Dothideomycetes	Massariosphaeria phaeospora CBS 611.86	GCA_011032825.1
Dothideomycetes	Lentithecium fluviatile CBS 122367 CBS 122367	GCA_010405425.1
Dothideomycetes	Microthyrium microscopicum CBS 115976	GCA_010405405.1
Dothideomycetes	Trichodelitschia bisporula CBS 262.69	GCA_010356995.1
Dothideomycetes	Didymella exigua CBS 183.55 CBS 183.55	GCA_010094145.1
Dothideomycetes	Ampelomyces quisqualis HMLAC05119	GCA_010094095.1
Dothideomycetes	Westerdykella ornata CBS 379.55	GCA_010094085.1
Dothideomycetes	Trematosphaeria pertusa CBS 122368	GCA_010094035.1
Dothideomycetes	Elsinoe ampelina CECT 20119	GCA_010093995.1
Dothideomycetes	Myriangium duriaei CBS 260.36 CBS 260.36	GCA_010093895.1
Dothideomycetes	Pseudovirgaria hyperparasitica CBS 121739	GCA_010093815.1
Dothideomycetes	Sporormia fimetaria CBS 119925 CBS 119925	GCA_010093795.1
Dothideomycetes	Piedraia hortae CBS 480.64 CBS 480.64	GCA_010093745.1
Dothideomycetes	Pleomassaria siparia CBS 279.74 CBS 279.74	GCA_010093715.1
Dothideomycetes	Patellaria atrata CBS 101060 CBS 101060	GCA_010093705.1
Dothideomycetes	Ophiobolus disseminans CBS 113818	GCA_010093685.1
Dothideomycetes	Macroventuria anomochaeta CBS 525.71	GCA_010093625.1
Dothideomycetes	Lophium mytilinum CBS 269.34	GCA_010093605.1
Dothideomycetes	Mytilinidion resinicola CBS 304.34	GCA_010093595.1
Dothideomycetes	Lindgomyces ingoldianus ATCC 200398	GCA_010093535.1
Dothideomycetes	Lineolata rhizophorae ATCC 16933	GCA_010093515.1
Dothideomycetes	Karstenula rhodostoma CBS 690.94 CBS 690.94	GCA_010093485.1
Dothideomycetes	Lophiotrema nucula CBS 627.86	GCA_010015825.1
Dothideomycetes	Dothidotthia symphoricarpi CBS 119687 CBS 119687	GCA_010015815.1
Dothideomycetes	Rhizodiscina lignyota CBS 133067	GCA_010015805.1
Dothideomycetes	Aaosphaeria arxii CBS 175.79 CBS 175.79	GCA_010015735.1
Dothideomycetes	Aulographum hederae CBS 113979 CBS 113979	GCA_010015705.1
Dothideomycetes	Byssothecium circinans CBS 675.92	GCA_010015675.1
Dothideomycetes	Cucurbitaria berberidis CBS 394.84 CBS 394.84	GCA_010015615.1
Dothideomycetes	Eremomyces bilateralis CBS 781.70 CBS 781.70	GCA_010015585.1
Dothideomycetes	Dissoconium aciculare CBS 342.82 CBS 342.82	GCA_010015565.1
Dothideomycetes	Delphinella strobiligena CBS 735.71	GCA_009982845.1
Dothideomycetes	Cercospora kikuchii ARG 18 001	GCA_009193115.1
Dothideomycetes	Trametes sanguinea ACCC51180	GCA_008973685.1
Dothideomycetes	Macrophomina phaseolina Al 1	GCA_008729065.1
Dothideomycetes	Bipolaris sorokiniana BRIP27492a	GCA_008452725.1
Dothideomycetes	Venturia effusa albino	GCA_007735645.1
Dothideomycetes	Elsinoe fawcettii	GCA_007556565.1
Dothideomycetes	Teratosphaeria gauchensis CMW 17545	GCA_007113925.1
Dothideomycetes	Cercospora cf. flagellaris Arck 07	GCA_005356885.1
Dothideomycetes	Alternaria brassicae J3	GCA_004936725.1
Dothideomycetes	Venturiashicola MAFF615029	GCA_004522665.1
Dothideomycetes	Didymella segeticola GZSQ 4	GCA_004522025.1
Dothideomycetes	Alternaria tenuissima FERA 1166	GCA_004156035.1
Dothideomycetes	Alternaria gaisen FERA 650	GCA_004156025.2
Dothideomycetes	Ramularia coccinea ATCC 14700	GCA_004155245.1
Dothideomycetes	Ascochyta rabiei	GCA_004011695.2
Dothideomycetes	Venturia inaequalis EU B04 ecotype domEU	GCA_003689225.1
Dothideomycetes	Acidomyces sp. richmondensis FRIK2901	GCA_003545705.1
Dothideomycetes	Pseudopyrenochaeta lycopersici	GCA_003313425.1
Dothideomycetes	Trametes villosa	GCA_002964805.2
Dothideomycetes	Alternaria solani	GCA_002952155.1
Dothideomycetes	Sphaceloma murrayae CQ 2017a	GCA_002895985.1
Dothideomycetes	Cercospora zeina CMW25467	GCA_002844615.2
Dothideomycetes	Alternaria solani HWC 168 2012p	GCA_002837235.1
Dothideomycetes	Alternaria brassicicola Abra43	GCA_002796735.1
Dothideomycetes	Microcyclospora pomicola SP1 49Fa	GCA_002786065.1
Dothideomycetes	Microcyclosporella mali UMD1a	GCA_002785985.1
Dothideomycetes	Cercospora sojina N1	GCA_002534735.1
Dothideomycetes	Ramichloridium luteum CPC 18961	GCA_002368545.1
Dothideomycetes	Dothistroma septosporum CMW 10798	GCA_002236655.2
Dothideomycetes	Dothistroma septosporum CMW 10211	GCA_002236575.2
Dothideomycetes	Cercospora sojina FLS21	GCA_002150695.1
Dothideomycetes	Diplodia seriata F98.1	GCA_001975905.1
Dothideomycetes	Alternaria consortialis JCM 1940	GCA_001950455.1
Dothideomycetes	Diplodia corticola CBS 112549	GCA_001883845.1
Dothideomycetes	Pyrenochaeta sp. DS3sAY3a DS3sAY3a	GCA_001644535.1
Dothideomycetes	Paraphaeosphaeria sporulosa AP3s5 JAC2a	GCA_001642045.1
Dothideomycetes	Beverwykella pulmonaria JCM 9230	GCA_001599595.1
Dothideomycetes	Peltaster fructicola LNHT1506	GCA_001592805.2
Dothideomycetes	Alternaria alternata ATCC 34957	GCA_001443195.1
Dothideomycetes	Aureobasidiummibiae CBS 147.97 CBS 147.97	GCA_000721765.1
Dothideomycetes	Bipolaris victoriae FI3 FI3	GCA_000527765.2
Dothideomycetes	Pyrenophora seminiperda CCB06 CCB06	GCA_000465215.2
Dothideomycetes	Pseudocercospora fijiensis CIRAD86 CIRAD86	GCA_000340215.1
Dothideomycetes	Baudoinia panamericana UAMH 10762 UAMH 10762	GCA_000338955.1
Dothideomycetes	Sphaerulina musiva SO2202 SO2202	GCA_000320565.2
Dothideomycetes	Coniosporium apollinis CBS 100218 CBS 100218	GCA_000281105.1
Dothideomycetes	Cladosporium sphaerospermum UM 843 UM 843	GCA_000261425.2
Dothideomycetes	Plenodomus lingam JN3	GCA_000230375.1
Dothideomycetes	Zymoseptoria tritici IPO323 IPO323	GCA_000219625.1
Eurotiomycetes	Penicillium salamii	GCA_911197365.1
Eurotiomycetes	Penicillium olsonii	GCA_911150075.1
Eurotiomycetes	Trichophyton violaceum	GCA_910592145.1
Eurotiomycetes	Trichophyton yaoundei	GCA_910592095.1
Eurotiomycetes	Trichophyton soudanense	GCA_910592025.1
Eurotiomycetes	Trichophyton kuryangei	GCA_910591655.1
Eurotiomycetes	Cladophialophora bantiana	GCA_900092765.1
Eurotiomycetes	Aspergillus spinulosporus	GCA_041684775.1
Eurotiomycetes	Aspergillus spinulosporus	GCA_041684735.1
Eurotiomycetes	Aspergillus quadrilineatus	GCA_041684395.1
Eurotiomycetes	Aspergillus quadrilineatus	GCA_041684375.1
Eurotiomycetes	Aspergillus latus	GCA_041682775.1
Eurotiomycetes	Aspergillus latus	GCA_041682755.1
Eurotiomycetes	Talaromyces variabilis HXQ H 1	GCA_040333175.1
Eurotiomycetes	Penicillium fuscoglaucum	GCA_040250155.1
Eurotiomycetes	Aspergillus fumigatus 08 19 02 30	GCA_040142875.1
Eurotiomycetes	Aspergillus fumigatus 47 10	GCA_040142855.1
Eurotiomycetes	Aspergillus pseudoglaucus E42	GCA_039880875.1
Eurotiomycetes	Aspergillus micronesiensis H39	GCA_039763685.1
Eurotiomycetes	Aspergillus aculeatus	GCA_039111485.1
Eurotiomycetes	Aspergillus aculeatus	GCA_039111445.1
Eurotiomycetes	Exophiala xenobiotica CCFEE 6078	GCA_038362935.1
Eurotiomycetes	Trichophyton interdigitale IGIB BK CI04	GCA_037576225.1
Eurotiomycetes	Aspergillus costaricensis LH A159	GCA_037044335.1
Eurotiomycetes	Aspergillus subversicolor LH A137	GCA_037044295.1
Eurotiomycetes	Aspergillus campestris LH A408	GCA_037044165.1
Eurotiomycetes	Aspergillus tennesseensis LH A417	GCA_037043975.1
Eurotiomycetes	Aspergillus austwickii LH A515	GCA_037043805.1
Eurotiomycetes	Penicillium sumatraense R121 14B	GCA_037041715.1
Eurotiomycetes	Knufia obscura CCFEE 5817	GCA_036327395.1
Eurotiomycetes	Exophiala bonariae CCFEE 5792	GCA_035927105.1
Eurotiomycetes	Aspergillus cristatus 2e	GCA_034509305.1
Eurotiomycetes	Aspergillus sydowii MNP 2	GCA_034192605.1
Eurotiomycetes	Camptophora hylomeconis CBS 113311 ecotype South Korea	GCA_032357745.1
Eurotiomycetes	Monascus ruber FM39 7	GCA_032348355.1
Eurotiomycetes	Aspergillus hortae MCA7	GCA_032158215.1
Eurotiomycetes	Aspergillus hortae MCA8	GCA_032158085.1
Eurotiomycetes	Talaromycesnjingensis JP NJ4	GCA_031010415.1
Eurotiomycetes	Penicillium turbatum BLH34	GCA_030762825.1
Eurotiomycetes	Penicillium oxalicum 5 18	GCA_030378375.1
Eurotiomycetes	Aspergillus pseudotamarii NRRL 25517	GCA_030324235.1
Eurotiomycetes	Penicillium parvum 4 14b	GCA_030035635.1
Eurotiomycetes	Arthroderma uncinatum T10	GCA_030015485.1
Eurotiomycetes	Microsporum ferrugineum M1a	GCA_030015455.1
Eurotiomycetes	Aspergillus fijiensis CY4	GCA_030014135.1
Eurotiomycetes	Nannizziopsis arthrosporioides CBS 118890	GCA_029635245.1
Eurotiomycetes	Penicillium antarcticum IBT 31339	GCA_028974205.1
Eurotiomycetes	Penicillium solitum IBT 25940	GCA_028829755.1
Eurotiomycetes	Penicillium tannophilum IBT 21756	GCA_028829675.1
Eurotiomycetes	Penicillium vulpinum IBT 29486	GCA_028829585.1
Eurotiomycetes	Penicillium soppii IBT 18220	GCA_028829465.1
Eurotiomycetes	Penicillium verhagenii IBT 33313	GCA_028828565.1
Eurotiomycetes	Penicillium taxi IBT 34144	GCA_028828555.1
Eurotiomycetes	Penicillium riverlandense IBT 135883	GCA_028828495.1
Eurotiomycetes	Penicillium psychrosexuale IBT 29551	GCA_028828465.1
Eurotiomycetes	Penicillium paradoxum IBT 22861	GCA_028828445.1
Eurotiomycetes	Penicillium malachiteum IBT 17514	GCA_028828335.1
Eurotiomycetes	Penicillium majusculum IBT 35410	GCA_028828285.1
Eurotiomycetes	Penicillium herquei IBT 20771	GCA_028828265.1
Eurotiomycetes	Penicillium lividum IBT 13676	GCA_028828245.1
Eurotiomycetes	Penicillium viridicatum IBT 34249	GCA_028828185.1
Eurotiomycetes	Penicillium odoratum IBT 22623	GCA_028828045.1
Eurotiomycetes	Penicillium pulvis IBT 33274	GCA_028828015.1
Eurotiomycetes	Penicillium longicatenatum IBT 33135	GCA_028827895.1
Eurotiomycetes	Penicillium expansum IBT 35385	GCA_028827855.1
Eurotiomycetes	Penicillium macrosclerotiorum IBT 26536	GCA_028827735.1
Eurotiomycetes	Penicillium maclennaniae IBT 15551	GCA_028827695.1
Eurotiomycetes	Penicillium lagena IBT 129212	GCA_028827675.1
Eurotiomycetes	Penicillium hetheringtonii IBT 29057	GCA_028827645.1
Eurotiomycetes	Penicillium diatomitis IBT 30728	GCA_028827545.1
Eurotiomycetes	Penicillium crustosum IBT 35664	GCA_028827405.1
Eurotiomycetes	Penicillium hordei IBT 12815	GCA_028827395.1
Eurotiomycetes	Penicillium atrosanguineum IBT 20685	GCA_028827265.1
Eurotiomycetes	Penicillium cosmopolitanum IBT 29677	GCA_028827165.1
Eurotiomycetes	Penicillium concentricum IBT 3081	GCA_028827145.1
Eurotiomycetes	Penicillium cataractarum IBT 29864	GCA_028827025.1
Eurotiomycetes	Penicillium coprophilum IBT 35676	GCA_028826855.1
Eurotiomycetes	Penicillium canariense IBT 26290	GCA_028826845.1
Eurotiomycetes	Aspergillus minisclerotigenes MRI400	GCA_028505865.1
Eurotiomycetes	Aspergillus minisclerotigenes MRI390	GCA_028505775.1
Eurotiomycetes	Aspergillus diversus NRRL 5074	GCA_027569885.1
Eurotiomycetes	Aspergillus nidulans 5mAN CM5298	GCA_027569745.1
Eurotiomycetes	Aspergillus cvjetkovicii NRRL 227	GCA_027569695.1
Eurotiomycetes	Penicillium silybi G85	GCA_027569585.1
Eurotiomycetes	Penicillium sclerotiorum NRRL 2074	GCA_027569435.1
Eurotiomycetes	Aspergillus haitiensis NRRL 4568	GCA_027569155.1
Eurotiomycetes	Aspergillus funiculosus NRRL 4744	GCA_027569145.1
Eurotiomycetes	Aspergillus fructus NRRL 239	GCA_027569115.1
Eurotiomycetes	Aspergillus baeticus NRRL 62501	GCA_027569055.1
Eurotiomycetes	Aspergillus biplanus NRRL 5071	GCA_027569045.1
Eurotiomycetes	Penicillium rubens 212	GCA_027256995.2
Eurotiomycetes	Aspergillus cristatus ACQ.1	GCA_026770215.1
Eurotiomycetes	Microsporum canis BMU 08102	GCA_026259285.1
Eurotiomycetes	Aspergillus wentii IMI 49129	GCA_026184555.1
Eurotiomycetes	Aspergillus ochraceus DY1 2022	GCA_026108165.1
Eurotiomycetes	Penicillium simplicissimum A4	GCA_024706585.1
Eurotiomycetes	Exophiala sp. LBMH1013 LBMH1013	GCA_024611085.1
Eurotiomycetes	Rhinocladiella similis Poitiers 1	GCA_024082115.1
Eurotiomycetes	Exophiala sp. HKRS030 HKRS030	GCA_023897205.1
Eurotiomycetes	Talaromyces albobiverticillius Tp 2	GCA_023721895.2
Eurotiomycetes	Aspergillus welwitschiae CCMB 663	GCA_023718355.1
Eurotiomycetes	Penicillium chrysogenum F30 04	GCA_023627295.1
Eurotiomycetes	Aspergillus lentulus PK20 01	GCA_023625555.1
Eurotiomycetes	Aspergillus amoenus S2904	GCA_023624915.1
Eurotiomycetes	Talaromyces amestolkiae X1601	GCA_023623795.1
Eurotiomycetes	Aspergillus tamarii PB2201	GCA_023619995.1
Eurotiomycetes	Aspergillus tamarii PB2203	GCA_023619855.1
Eurotiomycetes	Penicillium roqueforti CBS 147309	GCA_023141315.1
Eurotiomycetes	Trichophyton indotineae TIMM20115	GCA_023065845.1
Eurotiomycetes	Ophidiomyces ophidiicola CBS 122913	GCA_022830035.1
Eurotiomycetes	Aspergillus costaricensis FKII L6 BK DRAB1	GCA_022814465.1
Eurotiomycetes	Knufia fluminis FJI L2 BK P2	GCA_022813615.2
Eurotiomycetes	Exophiala viscosa JF 03 4F	GCA_022695825.1
Eurotiomycetes	Exophiala viscosa JF 03 3F	GCA_022695815.1
Eurotiomycetes	Microsporum audouinii IHEM 2214	GCA_022344085.1
Eurotiomycetes	Aspergillus oryzae 3.042	GCA_022023715.1
Eurotiomycetes	Aspergillus protuberus HOSP050413 4 129	GCA_021436995.1
Eurotiomycetes	Talaromyces proteolyticus PMI 201	GCA_021365285.1
Eurotiomycetes	Aspergillus montevidensis ZYD4	GCA_020826735.1
Eurotiomycetes	Penicillium griseofulvum D 756	GCA_020557365.1
Eurotiomycetes	Talaromyces trachyspermus 4014	GCA_020137715.1
Eurotiomycetes	Penicillium aurantiogriseum IBT 35659	GCA_019977855.1
Eurotiomycetes	Aspergillus westerdijkiae IBT 35663	GCA_019976475.1
Eurotiomycetes	Penicillium brevicompactum HOCR17	GCA_019843585.1
Eurotiomycetes	Penicillium citrinum F4 1A F1 F	GCA_019191195.1
Eurotiomycetes	Aspergillus oryzae 14160	GCA_019097755.1
Eurotiomycetes	Talaromyces purpureogenus Q2	GCA_019022425.1
Eurotiomycetes	Monascus pilosus K104061	GCA_018806895.1
Eurotiomycetes	Penicillium corylophilum F5 1S 1A F	GCA_018410145.1
Eurotiomycetes	Aspergillus unguis F6 8S P 2A	GCA_018408615.1
Eurotiomycetes	Aspergillus unguis F6 8S P 4A	GCA_018408605.1
Eurotiomycetes	Aspergillus viridinutans IFM 47045	GCA_018404265.1
Eurotiomycetes	Aspergillus pseudoviridinutans IFM 55266	GCA_018340605.1
Eurotiomycetes	Histoplasma capsulatum G184AR	GCA_017607465.1
Eurotiomycetes	Histoplasma ohiense nom. inval. G217B	GCA_017607445.1
Eurotiomycetes	Aspergillus sp. 2663 2663	GCA_016880755.1
Eurotiomycetes	Aspergillus puulaauensis MK2	GCA_016861865.1
Eurotiomycetes	Aspergillus chevalieri M1	GCA_016861735.1
Eurotiomycetes	Aspergillus luchuensis IFO 4308	GCA_016861625.1
Eurotiomycetes	Aspergillus felis FM324	GCA_016413765.1
Eurotiomycetes	Aspergillus sp. A31 A31	GCA_016162245.1
Eurotiomycetes	Aspergillus melleus CBS 546.65	GCA_016097325.1
Eurotiomycetes	Aspergillus elegans IMI 345568	GCA_016097275.1
Eurotiomycetes	Aspergillus terreus ASM 1	GCA_015266375.1
Eurotiomycetes	Nannizziopsis barbatae USC001	GCA_014964245.1
Eurotiomycetes	Aspergillus niger 3.316	GCA_013618955.1
Eurotiomycetes	Penicillium polonicum F7	GCA_013466175.1
Eurotiomycetes	Talaromyces rugulosus W13939	GCA_013368755.1
Eurotiomycetes	Aspergillus parasiticus E1348	GCA_013146005.1
Eurotiomycetes	Aspergillus parasiticus E1319	GCA_013145845.1
Eurotiomycetes	Penicillium digitatum DSM 62840	GCA_012295545.2
Eurotiomycetes	Arthroderma uncinatum CBS 119779	GCA_011692745.1
Eurotiomycetes	Penicillium rolfsii F1880	GCA_011392555.1
Eurotiomycetes	Exophiala dermatitidis CBS 115663	GCA_010883545.1
Eurotiomycetes	Exophiala dermatitidis CBS 132754	GCA_010883525.1
Eurotiomycetes	Exophiala phaeomuriformis CBS 132758	GCA_010883475.1
Eurotiomycetes	Exophiala spinifera BMU 00051	GCA_010882955.1
Eurotiomycetes	Aspergillus tubingensis C2 2	GCA_010614855.1
Eurotiomycetes	Aspergillus sojae TK 83	GCA_009687765.1
Eurotiomycetes	Talaromyces marneffei 11CN 03 130	GCA_009650675.1
Eurotiomycetes	Aspergillus sojae SMF134	GCA_008274985.1
Eurotiomycetes	Aspergillus ochraceus AO.MF010	GCA_005784425.1
Eurotiomycetes	Aspergillus cejpii FS110 ecotype China	GCA_004769165.1
Eurotiomycetes	Monascus purpureus GB 01	GCA_004359145.1
Eurotiomycetes	Talaromyces funiculosus X33	GCA_004299765.1
Eurotiomycetes	Exophiala mesophila CCFEE 6314	GCA_004011775.1
Eurotiomycetes	Exophiala lecanii corni CBS 102400	GCA_003955835.1
Eurotiomycetes	Aspergillus flavus 2017 Washington T2	GCA_003953715.1
Eurotiomycetes	Aspergillus flavus 2017 Washington T4	GCA_003953615.1
Eurotiomycetes	Aspergillus awamori IFM 58123	GCA_003850985.1
Eurotiomycetes	Chaetothyriales sp. CBS 132003 CBS 132003	GCA_003709865.1
Eurotiomycetes	Arthrocladium fulminans CBS 136243	GCA_003614865.1
Eurotiomycetes	Aspergillus tanneri NIH1004	GCA_003426965.1
Eurotiomycetes	Aspergillus mulundensis DSM 5745	GCA_003369625.1
Eurotiomycetes	Aspergillus phoenicis ATCC 13157 ATCC 13157	GCA_003344505.1
Eurotiomycetes	Aspergillus vadensis CBS 113365 CBS 113365	GCA_003184925.1
Eurotiomycetes	Aspergillus homomorphus CBS 101889 CBS 101889	GCA_003184865.1
Eurotiomycetes	Aspergillus ibericus CBS 121593 CBS 121593	GCA_003184845.1
Eurotiomycetes	Aspergillus costaricaensis CBS 115574 CBS 115574	GCA_003184835.1
Eurotiomycetes	Aspergillus fijiensis CBS 313.89 CBS 313.89	GCA_003184825.1
Eurotiomycetes	Aspergillus japonicus CBS 114.51 CBS 114.51	GCA_003184785.1
Eurotiomycetes	Aspergillus aculeatinus CBS 121060 CBS 121060	GCA_003184765.1
Eurotiomycetes	Aspergillus piperis CBS 112811 CBS 112811	GCA_003184755.1
Eurotiomycetes	Aspergillus uvarum CBS 121591 CBS 121591	GCA_003184745.1
Eurotiomycetes	Aspergillus brunneoviolaceus CBS 621.78 CBS 621.78	GCA_003184695.1
Eurotiomycetes	Aspergillus sclerotiicarbonarius CBS 121057 CBS 121057	GCA_003184635.1
Eurotiomycetes	Aspergillus neoniger CBS 115656 CBS 115656	GCA_003184625.1
Eurotiomycetes	Aspergillus saccharolyticus JOP 1030 1 JOP 1030 1	GCA_003184585.1
Eurotiomycetes	Aspergillus eucalypticola CBS 122712 CBS 122712	GCA_003184535.1
Eurotiomycetes	Aspergillus sclerotioniger CBS 115572 CBS 115572	GCA_003184525.1
Eurotiomycetes	Talaromyces borbonicus SV 2017a	GCA_002916415.1
Eurotiomycetes	Byssochlamys sp. AF001 AF001	GCA_002914405.1
Eurotiomycetes	Aspergillus steynii IBT 23096 IBT 23096	GCA_002849105.1
Eurotiomycetes	Aspergillus campestris IBT 28561 IBT 28561	GCA_002847485.1
Eurotiomycetes	Aspergillus novofumigatus IBT 16806 IBT 16806	GCA_002847465.1
Eurotiomycetes	Aspergillus ochraceoroseus IBT 24754 IBT 24754	GCA_002846915.2
Eurotiomycetes	Aspergillus persii NIBRFGC000004109	GCA_002215965.1
Eurotiomycetes	Ophidiomyces ophidiicola MYCO ARIZ AN0400001	GCA_002167195.1
Eurotiomycetes	Emergomyces orientalis 5z489	GCA_002110485.1
Eurotiomycetes	Penicillium steckii IBT 24891	GCA_002072375.1
Eurotiomycetes	Aspergillus glaucus CBS 516.65 CBS 516.65	GCA_001890805.1
Eurotiomycetes	Aspergillus tubingensis CBS 134.48 CBS 134.48	GCA_001890745.1
Eurotiomycetes	Aspergillus sydowii CBS 593.65 CBS 593.65	GCA_001890705.1
Eurotiomycetes	Aspergillus luchuensis CBS 106.47 CBS 106.47	GCA_001890685.1
Eurotiomycetes	Aspergillus versicolor CBS 583.65 CBS 583.65	GCA_001890125.1
Eurotiomycetes	Aspergillus brasiliensis CBS 101740 CBS 101740	GCA_001889945.1
Eurotiomycetes	Talaromyces piceae 9 3	GCA_001657655.1
Eurotiomycetes	Fonsecaea erecta CBS 125763	GCA_001651985.1
Eurotiomycetes	Trichophyton rubrum CMCCFT1i	GCA_001651445.1
Eurotiomycetes	Fonsecaea multimorphosa CBS 980.96	GCA_001646985.1
Eurotiomycetes	Ascosphaera apis ARSEF 7405 ARSEF 7405	GCA_001636715.1
Eurotiomycetes	Aspergillus terreus 45A	GCA_001630395.1
Eurotiomycetes	Aspergillus chevalieri JCM 23047	GCA_001599875.1
Eurotiomycetes	Thermoascus crustaceus JCM 12817	GCA_001599835.1
Eurotiomycetes	Exophiala calicioides JCM 6030	GCA_001599795.1
Eurotiomycetes	Exophiala alcalophila JCM 1751	GCA_001599775.1
Eurotiomycetes	Aspergillus awamori var. piceus JCM 22320	GCA_001599415.1
Eurotiomycetes	Talaromyces pinophilus 1 95	GCA_001571465.2
Eurotiomycetes	Aspergillus calidoustus	GCA_001511075.1
Eurotiomycetes	Aspergillus lentulus IFM 54703	GCA_001445615.2
Eurotiomycetes	Cyphellophora attinorum CBS 131958	GCA_001299255.1
Eurotiomycetes	Aspergillus udagawae IFM 46973	GCA_001078395.2
Eurotiomycetes	Talaromyces islandicus	GCA_000985935.1
Eurotiomycetes	Penicillium capsulatum ATCC 48735	GCA_000943765.1
Eurotiomycetes	Fonsecaea multimorphosa CBS 102226 CBS 102226	GCA_000836435.1
Eurotiomycetes	Rhinocladiella mackenziei CBS 650.93 CBS 650.93	GCA_000835555.1
Eurotiomycetes	Exophiala oligosperma CBS 72588	GCA_000835515.1
Eurotiomycetes	Exophiala xenobiotica CBS 118157	GCA_000835505.1
Eurotiomycetes	Cladophialophora bantiana CBS 173.52 CBS 173.52	GCA_000835475.1
Eurotiomycetes	Fonsecaea pedrosoi CBS 271.37 CBS 271.37	GCA_000835455.1
Eurotiomycetes	Exophiala sideris CBS 121828	GCA_000835395.1
Eurotiomycetes	Exophiala aquamarina CBS 119918 CBS 119918	GCA_000709125.1
Eurotiomycetes	Endocarpon pusillum KoLRI No. LF000583	GCA_000611755.1
Eurotiomycetes	Aspergillus ruber CBS 135680 CBS 135680	GCA_000600275.1
Eurotiomycetes	Capronia coronata CBS 617.96 CBS 617.96	GCA_000585585.1
Eurotiomycetes	Capronia epimyces CBS 606.96 CBS 606.96	GCA_000585565.1
Eurotiomycetes	Cladophialophora psammophila CBS 110553 CBS 110553	GCA_000585535.1
Eurotiomycetes	Cladophialophora yegresii CBS 114405 CBS 114405	GCA_000585515.1
Eurotiomycetes	Penicillium camemberti FM 013 FM 013	GCA_000513335.1
Eurotiomycetes	Cladophialophora carrionii CBS 160.54 CBS 160.54	GCA_000365165.2
Eurotiomycetes	Cyphellophora europaea CBS 101466 CBS 101466	GCA_000365145.2
Eurotiomycetes	Aspergillus niger ATCC 1015 ATCC 1015	GCA_000230395.2
Eurotiomycetes	Trichophyton tonsurans CBS 112818 CBS 112818	GCA_000151455.1
Eurotiomycetes	Coccidioides posadasii C735 delta SOWgp C735 delta SOWgp	GCA_000151335.1
Eurotiomycetes	Trichophyton equinum CBS 127.97 CBS 127.97	GCA_000151175.1
Eurotiomycetes	Trichophyton benhamiae CBS 112371 CBS 112371	GCA_000151125.2
Eurotiomycetes	Paracoccidioides lutzii Pb01 Pb01	GCA_000150705.2
Eurotiomycetes	Paracoccidioides brasiliensis Pb03 Pb03	GCA_000150475.2
Eurotiomycetes	Coccidioides posadasii RMSCC 2133 RMSCC 2133	GCA_000150185.1
Eurotiomycetes	Histoplasma capsulatum G186AR G186AR	GCA_000150115.1
Eurotiomycetes	Coccidioides immitis RMSCC 2394 RMSCC 2394	GCA_000149895.1
Eurotiomycetes	Aspergillus fischeri NRRL 181 NRRL 181	GCA_000149645.4
Eurotiomycetes	Coccidioides immitis RS RS	GCA_000149335.2
Eurotiomycetes	Aspergillus nidulans FGSC A4 FGSC A4	GCA_000011425.1
Eurotiomycetes	Blastomyces gilchristii SLH14081 SLH14081	GCA_000003855.2
Eurotiomycetes	Blastomyces dermatitidis ER 3 ER 3	GCA_000003525.2
Eurotiomycetes	Uncinocarpus reesii 1704 1704	GCA_000003515.2
Eurotiomycetes	Aspergillus clavatus NRRL 1 NRRL 1	GCA_000002715.1
Lecanoromycetes	Cladonia norvegica	GCA_963971245.1
Lecanoromycetes	Cladonia squamosa	GCA_947623575.2
Lecanoromycetes	Cladonia squamosa	GCA_947623385.2
Lecanoromycetes	Gomphillus americanus	GCA_905337335.1
Lecanoromycetes	Cyanodermella asteris	GCA_900618795.1
Lecanoromycetes	Cladonia stellaris	GCA_040955015.1
Lecanoromycetes	Cladonia stellaris	GCA_040955005.1
Lecanoromycetes	Ramalina farinacea	GCA_029948375.1
Lecanoromycetes	Acarospora socialis JNA AS CCGP158	GCA_025617375.2
Lecanoromycetes	Umbilicaria hispanica	GCA_023184715.1
Lecanoromycetes	Umbilicaria spodochroa	GCA_023184705.1
Lecanoromycetes	Umbilicaria phaea	GCA_023184695.1
Lecanoromycetes	Umbilicaria freyi	GCA_023184675.1
Lecanoromycetes	Umbilicaria deusta	GCA_023184635.1
Lecanoromycetes	Umbilicaria subpolyphylla	GCA_023184615.1
Lecanoromycetes	Umbilicaria grisea	GCA_023184595.1
Lecanoromycetes	Lasallia pustulata	GCA_023184575.1
Lecanoromycetes	Cladonia rangiferina SA24 ecotype Boreal forests of Canada	GCA_023065455.1
Lecanoromycetes	Ptychographa xylographoides	GCA_022814105.1
Lecanoromycetes	Pseudevernia furfuracea Pfur oli TBG 2151	GCA_022315425.1
Lecanoromycetes	Pseudevernia furfuracea Pfur phy TBG 2152	GCA_022315165.1
Lecanoromycetes	Cladonia borealis ANT050790	GCA_018257855.2
Lecanoromycetes	Letharia lupina	GCA_014066315.1
Lecanoromycetes	Letharia columbiana	GCA_014066305.1
Lecanoromycetes	Lasallia pustulata	GCA_008636195.1
Lecanoromycetes	Pseudevernia furfuracea AKPM 0122M	GCA_003184345.1
Lecanoromycetes	Ramalina intermedia YAF0013	GCA_003073195.1
Lecanoromycetes	Umbilicaria muehlenbergii KoLRI No. LF000956	GCA_000611775.1
Lecanoromycetes	Cladonia metacorallifera KoLRI002260	GCA_000482085.2
Lecanoromycetes	Gyalolechia flavorubescens KoLRI002931 KoLRI002931	GCA_000442125.1
Leotiomycetes	Diplocarpon coronariae	GCA_964058965.1
Leotiomycetes	Blumeria graminis f. sp. tritici	GCA_927323605.2
Leotiomycetes	Hymenoscyphus fraxineus	GCA_911649665.1
Leotiomycetes	Blumeria graminis f. sp. triticale	GCA_905067625.1
Leotiomycetes	Sclerotinia trifoliorum	GCA_905066765.1
Leotiomycetes	Myriosclerotinia sulcatula	GCA_902810775.1
Leotiomycetes	Blumeria graminis f. sp. tritici	GCA_900519115.1
Leotiomycetes	Blumeria hordei RACE1	GCA_900237765.1
Leotiomycetes	Hymenoscyphus fraxineus	GCA_900184765.1
Leotiomycetes	Rhynchosporium commune UK7	GCA_900074885.1
Leotiomycetes	Chaetomella raphigera JCM 9995	GCA_040369945.1
Leotiomycetes	Sclerotinia sclerotiorum #321	GCA_039834505.1
Leotiomycetes	Cyclaneusma minus 3276	GCA_038502575.1
Leotiomycetes	Cyclaneusma minus 110	GCA_037179365.1
Leotiomycetes	Cyclaneusma minus 1800	GCA_037179285.1
Leotiomycetes	Tetracladium maxilliforme P2R61M	GCA_037074925.1
Leotiomycetes	Botrytis cinerea BC371	GCA_037039555.1
Leotiomycetes	Botrytis cinerea BC448	GCA_037039525.1
Leotiomycetes	Diplocarpon rosae R4	GCA_032760415.1
Leotiomycetes	Botrytis fabae	GCA_032594075.1
Leotiomycetes	Tetracladium setigerum NNIBRFG1997	GCA_031472005.1
Leotiomycetes	Podosphaera fusca	GCA_030378345.1
Leotiomycetes	Pseudogymnoascus sp. SDFLT0511 SDFLT0511	GCA_030180035.1
Leotiomycetes	Filosporella fistucella CCM F 13091	GCA_030077755.1
Leotiomycetes	Monilinia fructicola	GCA_029929755.1
Leotiomycetes	Sclerotinia nivalis SnTB1	GCA_029531795.1
Leotiomycetes	Podosphaera xanthii YZU573	GCA_028751805.1
Leotiomycetes	Ciborinia camelliae ITAC2	GCA_025890175.1
Leotiomycetes	Sclerotinia subarctica	GCA_025389085.1
Leotiomycetes	Sclerotinia minor	GCA_025389075.1
Leotiomycetes	Allantophomopsis lycopodina ATCC 66958	GCA_024752465.1
Leotiomycetes	Allantophomopsis cytisporea ATCC 66955	GCA_024752435.1
Leotiomycetes	Botrytis elliptica Be9401	GCA_024478385.1
Leotiomycetes	Hymenoscyphus varicosporioides PMI 453	GCA_021365295.1
Leotiomycetes	Botrytis medusae B555	GCA_019395255.1
Leotiomycetes	Tetracladium sp. T11 2 10C	GCA_017654775.1
Leotiomycetes	Monilinia vaccinii corymbosi RL 1	GCA_017357885.1
Leotiomycetes	Monilinia fructicola CPMC6	GCA_016906325.1
Leotiomycetes	Botrytis elliptica Be9612	GCA_014898555.1
Leotiomycetes	Botrytis deweyae B1	GCA_014898535.1
Leotiomycetes	Botrytis squamosa MUCL 31421	GCA_014898485.2
Leotiomycetes	Botrytis porri MUCL 3234	GCA_014898465.1
Leotiomycetes	Botrytis sinoallii Bc 23	GCA_014898435.1
Leotiomycetes	Botrytis byssoidea MUCL 94	GCA_014898295.1
Leotiomycetes	Botrytis aclada 633	GCA_014898285.1
Leotiomycetes	Botrytis fragariae BVB16	GCA_013461495.1
Leotiomycetes	Pezicula neosporulosa M44	GCA_009805495.1
Leotiomycetes	Monilinia laxa Mlax316	GCA_009299455.1
Leotiomycetes	Monilinia fructicola Mfrc123	GCA_008692225.1
Leotiomycetes	Margaritispora aquatica NNIBRFG339	GCA_007644065.1
Leotiomycetes	Proliferodiscus dingleyae D683	GCA_003988795.1
Leotiomycetes	Articulospora tetracladia NNIBRFG329	GCA_003415645.1
Leotiomycetes	Venustampulla echinocandica BP 5553	GCA_003357145.1
Leotiomycetes	Monilinia fructigena Mfrg269	GCA_003260565.1
Leotiomycetes	Hyaloscypha variabilis F F	GCA_002865655.1
Leotiomycetes	Sclerotinia sclerotiorum 1980 UF 70 1980	GCA_001857865.1
Leotiomycetes	Pseudogymnoascus verrucosus UAMH 10579	GCA_001662655.1
Leotiomycetes	Pseudogymnoascus destructans 20631 21	GCA_001641265.1
Leotiomycetes	Glarea lozoyensis ATCC 20868 ATCC 20868	GCA_000409485.1
Leotiomycetes	Sclerotinia sclerotiorum 1980 UF 70 1980	GCA_000146945.2
Leotiomycetes	Botrytis cinerea B05.10 B05.10	GCA_000143535.4
Microbotryomycetes	Rhodotorula babjevae CBS 7808	GCA_920104245.2
Microbotryomycetes	Rhodotorula glutinis CBS 20	GCA_920103745.3
Microbotryomycetes	Rhodotorula babjevae DBVPG 8058	GCA_920103735.2
Microbotryomycetes	Microbotryum saponariae	GCA_900100905.1
Microbotryomycetes	Microbotryum intermedium	GCA_900096595.1
Microbotryomycetes	Microbotryum saponariae 1268	GCA_900015975.1
Microbotryomycetes	Microbotryum saponariae 1269	GCA_900015475.1
Microbotryomycetes	Microbotryum lychnidis dioicae	GCA_900015445.1
Microbotryomycetes	Sporobolomyces carnicolor JCM 3766	GCA_039545255.1
Microbotryomycetes	Rhodotorula sp. BUB8 BUB8	GCA_038381065.1
Microbotryomycetes	Rhodotorula glutinis	GCA_037974285.1
Microbotryomycetes	Sporobolomyces phaffii	GCA_037042985.1
Microbotryomycetes	Rhodotorula paludigena BS15	GCA_036244875.1
Microbotryomycetes	Rhodotorula paludigena LL69 1	GCA_033458335.1
Microbotryomycetes	Rhodotorula sphaerocarpa ETNP2018	GCA_030983975.1
Microbotryomycetes	Rhodotorula graminis JJ10.1	GCA_026119225.1
Microbotryomycetes	Rhodotorula mucilaginosa 2NF929A	GCA_025502865.1
Microbotryomycetes	Rhodotorula sphaerocarpa GDMCC 60679	GCA_024713535.1
Microbotryomycetes	Sporobolomyces roseus Y8	GCA_022817875.1
Microbotryomycetes	Rhodotorula kratochvilovae Y14	GCA_022817825.1
Microbotryomycetes	Microbotryum intermedium 1389	GCA_022702645.1
Microbotryomycetes	Microbotryum scabiosae 1118	GCA_022702625.1
Microbotryomycetes	Microbotryum scabiosae 1118	GCA_022702605.1
Microbotryomycetes	Microbotryum violaceum 01509 a1	GCA_022506095.1
Microbotryomycetes	Microbotryum violaceum 01299 a1	GCA_022506005.1
Microbotryomycetes	Microbotryum violaceum 01299 a2	GCA_022505985.1
Microbotryomycetes	Rhodotorula sp. CC01 CC01	GCA_021654155.1
Microbotryomycetes	Rhodotorula kratochvilovae YM25235	GCA_019926025.1
Microbotryomycetes	Rhodotorula mucilaginosa F6 1S P 1A	GCA_019191155.1
Microbotryomycetes	Sporobolomyces roseus SR19	GCA_016617785.1
Microbotryomycetes	Rhodotorula glutinis ZHK	GCA_015501985.1
Microbotryomycetes	Microbotryum silenes dioicae 1303	GCA_014805725.1
Microbotryomycetes	Sporobolomyces pararoseus NGR	GCA_010758995.1
Microbotryomycetes	Rhodotorula paludigena CM33	GCA_005281665.1
Microbotryomycetes	Rhodotorula sp. CCFEE 5036 CCFEE 5036	GCA_005059875.1
Microbotryomycetes	Rhodotorula mucilaginosa CYJ03	GCA_004143675.1
Microbotryomycetes	Microbotryum silenes acaulis 1248	GCA_003665835.1
Microbotryomycetes	Microbotryum silenes acaulis 1248	GCA_003665825.1
Microbotryomycetes	Microbotryum lychnidis dioicae MvSl 1318 A1	GCA_003121365.1
Microbotryomycetes	Microbotryum lychnidis dioicae MvSl 1318 A2	GCA_003121355.1
Microbotryomycetes	Rhodotorula taiwanensis MD1149	GCA_002922495.1
Microbotryomycetes	Rhodotorula kratochvilovae LS11	GCA_002917965.1
Microbotryomycetes	Glaciozyma antarctica PI12 PI12	GCA_002917775.1
Microbotryomycetes	Leucosporidium creatinivorum 62 1032	GCA_002105055.1
Microbotryomycetes	Leucosporidium creatinivorum JCM 10699	GCA_001600635.1
Microbotryomycetes	Rhodotorula toruloides ATCC 10788	GCA_001542305.1
Microbotryomycetes	Rhodotorula toruloides ATCC 10657	GCA_001542265.1
Microbotryomycetes	Rhodotorula graminis WP1 WP1	GCA_001329695.1
Microbotryomycetes	Rhodotorula toruloides ATCC 204091 ATCC 204091	GCA_000222205.2
Mucoromycetes	Mucor piriformis	GCA_943193635.1
Mucoromycetes	Mucor piriformis	GCA_943193625.1
Mucoromycetes	Mucor flavus KT1a	GCA_040367835.1
Mucoromycetes	Mucor lusitanicus CBS 277.49	GCA_040256725.1
Mucoromycetes	Phycomyces blakesleeanus UBC21	GCA_040209145.1
Mucoromycetes	Mucor circinelloides	GCA_037974945.1
Mucoromycetes	Mucor velutinosus NIH1002	GCA_035048745.1
Mucoromycetes	Lichtheimia ramosa	GCA_029582045.1
Mucoromycetes	Mucor racemosus C	GCA_027405735.1
Mucoromycetes	Actinomucor elegans	GCA_026027325.1
Mucoromycetes	Dichotomocladium elegans RSA 919	GCA_025716815.1
Mucoromycetes	Phascolomyces articulosus RSA 2281	GCA_025677815.1
Mucoromycetes	Phycomyces nitens S608	GCA_025531835.1
Mucoromycetes	Chlamydoabsidia padenii NRRL 2977	GCA_025330725.1
Mucoromycetes	Gongronella butleri CBS 227.36	GCA_025201375.1
Mucoromycetes	Halteromyces radiatus CBS 162.75	GCA_025201355.1
Mucoromycetes	Phycomyces nitens	GCA_022702545.1
Mucoromycetes	Mucor lusitanicus MU402	GCA_010203745.1
Mucoromycetes	Lichtheimia ramosa KPH11	GCA_008728235.1
Mucoromycetes	Absidia repens NRRL 1336	GCA_002105175.1
Mucoromycetes	Syncephalastrum racemosum NRRL 2496	GCA_002105135.1
Mucoromycetes	Hesseltinella vesiculosa NRRL 3301	GCA_002104935.1
Mucoromycetes	Gongronella sp. w5 w5	GCA_001650995.1
Mucoromycetes	Phycomyces blakesleeanus NRRL 1555 NRRL 1555	GCA_001638985.2
Mucoromycetes	Mucor lusitanicus CBS 277.49 CBS 277.49	GCA_001638945.1
Mucoromycetes	Actinomucor elegans JCM 22485	GCA_001599635.1
Mucoromycetes	Lichtheimia ramosa JMRC FSU6197	GCA_000945115.1
Orbiliomycetes	Arthrobotrys conoides AC XJ	GCA_040437185.1
Orbiliomycetes	Arthrobotrys conoides TWF506	GCA_036971725.1
Orbiliomycetes	Arthrobotrys musiformis TWF481	GCA_036971715.1
Orbiliomycetes	Orbilia ellipsospora TWF694	GCA_036971675.1
Orbiliomycetes	Arthrobotrys megalospora TWF281	GCA_036971655.1
Orbiliomycetes	Drechslerella coelobrocha CGMCC 3.6772	GCA_036971555.1
Orbiliomycetes	Drechslerella dactyloides CGMCC 3.6771	GCA_036971535.1
Orbiliomycetes	Arthrobotrys musiformis CGMCC 3.6778	GCA_036971485.1
Orbiliomycetes	Dactylellina sp. tibetensis SQ 2179	GCA_036971435.1
Orbiliomycetes	Orbilia brochopaga CGMCC 3.6765	GCA_036971425.1
Orbiliomycetes	Orbilia quercus CGMCC 3.6762	GCA_036971405.1
Orbiliomycetes	Dactylellina parvicollis XJ03 136 1	GCA_036971385.1
Orbiliomycetes	Dactylellina cionopaga CBS 113.355	GCA_036971325.1
Orbiliomycetes	Dactylellina cionopaga CGMCC 3.6783	GCA_036971295.1
Orbiliomycetes	Dactylellina cionopaga CGMCC 3.6777	GCA_036971285.1
Orbiliomycetes	Orbilia blumenaviensis CGMCC 3.6763	GCA_036971255.1
Orbiliomycetes	Arthrobotrys sinensis CGMCC 3.6755	GCA_036971225.1
Orbiliomycetes	Arthrobotrys pseudoclavata CGMCC 3.6756	GCA_036971205.1
Orbiliomycetes	Arthrobotrys iridis CGMCC 3.6761	GCA_036971165.1
Orbiliomycetes	Orbilia blumenaviensis TWF730	GCA_036872755.1
Orbiliomycetes	Orbilia javanica TWF718	GCA_036872735.1
Orbiliomycetes	Orbilia brochopaga TWF696	GCA_036872635.1
Orbiliomycetes	Dactylellina haptotyla YMF1.03409	GCA_031310005.1
Orbiliomycetes	Arthrobotrys flagrans CBS 565.50	GCA_030406815.1
Orbiliomycetes	Drechslerella dactyloides YMF1.00031	GCA_028984885.1
Orbiliomycetes	Drechslerella dactyloides CGMCC3.20198	GCA_020064725.1
Orbiliomycetes	Dactylella cylindrospora CBS325.70	GCA_012184295.1
Orbiliomycetes	Orbilia oligospora TWF970	GCA_011066845.1
Orbiliomycetes	Arthrobotrys flagrans CIM1	GCA_009651115.1
Orbiliomycetes	Orbilia oligospora TWF154	GCA_004768765.1
Orbiliomycetes	Arthrobotrys flagrans CBS H 5679 ecotype Germany	GCA_004000055.1
Orbiliomycetes	Drechslerella stenobrocha 248 248	GCA_000525045.1
Pezizomycetes	Gyromitra esculenta 21701	GCA_038503075.1
Pezizomycetes	Ascodesmis sphaerospora NRRL 22422	GCA_027569015.1
Pezizomycetes	Morchella septimelata 2015 9hao	GCA_024713935.1
Pezizomycetes	Morchella sp. 2015 Win8 2015 Win8	GCA_024713845.1
Pezizomycetes	Morchella sp. 2015 shanyang 2015 shanyang	GCA_024713795.1
Pezizomycetes	Morchella sp. 2014 9hei 2014 9hei	GCA_024713685.1
Pezizomycetes	Morchella sextelata 2015 114	GCA_024713665.1
Pezizomycetes	Morchella rufobrunnea 2019 VR	GCA_024713595.1
Pezizomycetes	Morchella snyderi CBS 144464	GCA_024521645.1
Pezizomycetes	Tricharina praecox CBS 144465	GCA_024521635.1
Pezizomycetes	Pyronema domesticum CBS 144463	GCA_024516145.1
Pezizomycetes	Morchella sextelata SCLS	GCA_020137385.1
Pezizomycetes	Morchella sextelata NZTD180501373	GCA_009741755.1
Pezizomycetes	Morchella crassipes M10	GCA_009192285.1
Pezizomycetes	Ascodesmis nigricans CBS 389.68	GCA_004786065.1
Pezizomycetes	Morchella importuna M04M26	GCA_003444635.2
Saccharomycetes	Lodderomyces beijingensis CBS 14171	GCA_963989305.1
Saccharomycetes	Candida anglica 28E1s 12	GCA_963924425.1
Saccharomycetes	Candida anglica 29B2s 10	GCA_963924405.1
Saccharomycetes	Metschnikowia agaves	GCA_963678735.1
Saccharomycetes	Monosporozyma servazzii	GCA_963678725.1
Saccharomycetes	Wickerhamiella slavikovae	GCA_954870865.1
Saccharomycetes	Wickerhamomyces alni	GCA_949709075.1
Saccharomycetes	Maudiozyma barnettii	GCA_949640895.1
Saccharomycetes	Jamesozyma spencerorum	GCA_949640775.1
Saccharomycetes	Zygosaccharomyces pseudobailii	GCA_949129085.1
Saccharomycetes	Candida verbasci	GCA_947670415.1
Saccharomycetes	Candida aaseri	GCA_947297635.1
Saccharomycetes	Blastobotrys aristatus UCD613	GCA_946409495.1
Saccharomycetes	Torulaspora quercuum UCD657	GCA_946403475.1
Saccharomycetes	Candida jaroonii CLIB 1444	GCA_943733655.1
Saccharomycetes	Metschnikowia zobellii	GCA_939531405.1
Saccharomycetes	Metschnikowia zobellii	GCA_939531315.1
Saccharomycetes	Candida railenensis CLIB 1423	GCA_935541525.1
Saccharomycetes	Torulaspora indica	GCA_931305995.1
Saccharomycetes	Torulaspora microellipsoides	GCA_931305935.1
Saccharomycetes	Torulaspora quercuum	GCA_931304085.1
Saccharomycetes	Torulaspora maleeae	GCA_931303985.1
Saccharomycetes	Saccharomyces arboricola yHDPN432 ecotype Oceania	GCA_918268255.1
Saccharomycetes	Saccharomyces kudriavzevii CBS8840 ecotype Asia A	GCA_918252685.1
Saccharomycetes	Saccharomyces mikatae IFO1815	GCA_918250775.1
Saccharomycetes	Saprochaete ingens CBS 517.90	GCA_902498895.1
Saccharomycetes	Saprochaete fungicola	GCA_900654225.1
Saccharomycetes	Saprochaete suaveolens	GCA_900642975.1
Saccharomycetes	Candida hispaniensis CBS 9996	GCA_900535975.1
Saccharomycetes	Yarrowia deformans CBS 2071	GCA_900519085.1
Saccharomycetes	Yarrowia bubula CBS 12934	GCA_900519075.1
Saccharomycetes	Yarrowia hollandica CBS 4855	GCA_900519065.1
Saccharomycetes	Yarrowia divulgata CBS 11013	GCA_900519045.1
Saccharomycetes	Yarrowia keelungensis CBS 11062	GCA_900519035.1
Saccharomycetes	Yarrowia porcina CBS 12935	GCA_900519025.1
Saccharomycetes	Yarrowia osloensis CBS 10146	GCA_900519015.1
Saccharomycetes	Yarrowia phangngaensis CBS 10407	GCA_900519005.1
Saccharomycetes	Yarrowia yakushimensis CBS 10253	GCA_900518995.1
Saccharomycetes	Yarrowia alimentaria CBS 10151	GCA_900518985.1
Saccharomycetes	Magnusiomyces capitatus NRRL Y 17686	GCA_900497725.1
Saccharomycetes	Magnusiomyces ingens NRRL Y 17630	GCA_900497715.1
Saccharomycetes	Candida vartiovaarae	GCA_900465365.1
Saccharomycetes	Zygosaccharomyces sapae	GCA_900465325.1
Saccharomycetes	Saccharomyces jurei	GCA_900290405.1
Saccharomycetes	Komagataella phaffii CBS 7435	GCA_900235035.2
Saccharomycetes	Candida psychrophila	GCA_900186205.1
Saccharomycetes	Torulaspora microellipsoides	GCA_900186055.1
Saccharomycetes	Lachancea fermentati CBS 6772	GCA_900074765.1
Saccharomycetes	Lachancea nothofagi CBS 11611 CBS 11611	GCA_900074755.1
Saccharomycetes	Lachancea mirantina CBS 11717	GCA_900074745.1
Saccharomycetes	Lachancea sp. fantastica CBS 6924	GCA_900074735.1
Saccharomycetes	Lachancea dasiensis CBS 10888	GCA_900074725.1
Saccharomycetes	Lachancea meyersii CBS 8951 CBS 8951	GCA_900074715.1
Saccharomycetes	Priceomyces carsonii CBS4050	GCA_900007245.1
Saccharomycetes	Debaryomyces fabryi	GCA_900007135.1
Saccharomycetes	Debaryomyces tyrocola	GCA_900006135.1
Saccharomycetes	Pichiaceae sp.	GCA_041498895.1
Saccharomycetes	Candida albicans 101	GCA_041438225.1
Saccharomycetes	Candida albicans 101	GCA_041438215.1
Saccharomycetes	Hanseniaspora menglaensis CBS 16921	GCA_040256855.1
Saccharomycetes	Ogataea parapolymorpha BF 20 17Y	GCA_040207675.1
Saccharomycetes	Torulaspora sp. 2017 36 1 2017 36 1	GCA_040114505.1
Saccharomycetes	Torulaspora sp. 2017 38 3 2017 38 3	GCA_040114465.1
Saccharomycetes	Pichia pseudocactophila CBS 6929	GCA_039700735.1
Saccharomycetes	Lipomyces japonicus CBS 7319	GCA_038497905.1
Saccharomycetes	Lipomyces oligophaga CBS 7107	GCA_038497815.1
Saccharomycetes	Lipomyces mesembrius CBS 7600	GCA_038497805.1
Saccharomycetes	Lipomyces arxii Phaff 12 163	GCA_038497795.1
Saccharomycetes	Lipomyces chichibuensis CBS 12929	GCA_038497645.1
Saccharomycetes	Candida sonorensis BW 1	GCA_037951595.1
Saccharomycetes	Candida nonsorbophila RW 1	GCA_037951565.1
Saccharomycetes	Candida nonsorbophila RP 1	GCA_037951475.1
Saccharomycetes	Candida boidinii CICC#33029	GCA_037935595.1
Saccharomycetes	Meyerozyma guilliermondii AF01	GCA_037116185.1
Saccharomycetes	Saccharomycopsis crataegensis SC 9	GCA_037102585.1
Saccharomycetes	Blastobotrys sp. G 9 G 9	GCA_037074825.1
Saccharomycetes	Hyphopichia burtonii LH A245	GCA_037044105.1
Saccharomycetes	Wickerhamiella sp. F6312 F6312	GCA_037041415.1
Saccharomycetes	Wickerhamomyces sp. DX7706 1 DX7706 1	GCA_037041065.1
Saccharomycetes	Starmerella sp. DX6506 DX6506	GCA_037041025.1
Saccharomycetes	Torulaspora delbrueckii DX121 04	GCA_037040955.1
Saccharomycetes	Spathaspora sp. P7602 P7602	GCA_037040735.1
Saccharomycetes	Scheffersomyces xylosifermentans CBS 12540	GCA_036884685.1
Saccharomycetes	Scheffersomyces coipomensis NRRL Y 17651	GCA_036884675.1
Saccharomycetes	Blastobotrys mucifer 17G1312	GCA_036871495.1
Saccharomycetes	Scheffersomyces amazonensis UFMG HMD 26.3	GCA_036850825.1
Saccharomycetes	Naumovozyma castellii XF0241	GCA_036850575.1
Saccharomycetes	Hanseniaspora guilliermondii CBS18551	GCA_036287555.1
Saccharomycetes	Pichia fermentans CDLB.YE03	GCA_035610515.1
Saccharomycetes	Debaryomyces castellii UCD805	GCA_032927745.1
Saccharomycetes	Candida zeylanoides	GCA_032774475.1
Saccharomycetes	Candida metapsilosis 2015 Cm 1	GCA_032715015.1
Saccharomycetes	Candida metapsilosis 2015 Cm 2	GCA_032714915.1
Saccharomycetes	Candida tropicalis 2015 Ct 1	GCA_032714815.1
Saccharomycetes	Candida parapsilosis 2015 Cp	GCA_032714795.1
Saccharomycetes	Candida zeylanoides	GCA_031851675.1
Saccharomycetes	Saccharomycopsis capsularis CBS 5638	GCA_031125625.1
Saccharomycetes	Saccharomycopsis capsularis CBS 7262	GCA_031125595.1
Saccharomycetes	Saccharomycopsis fermentans CBS 7830	GCA_031125555.1
Saccharomycetes	Saccharomycopsis fodiens CBS 8332	GCA_031125535.1
Saccharomycetes	Saccharomycopsis guyanensis CBS 12914	GCA_031125505.1
Saccharomycetes	Saccharomycopsis javanensis CBS 2555	GCA_031125485.1
Saccharomycetes	Saccharomycopsis lassenensis CBS 8524	GCA_031125475.1
Saccharomycetes	Saccharomycopsis microspora CBS 6393	GCA_031125455.1
Saccharomycetes	Saccharomycopsis synnaedendra CBS 7763	GCA_031124835.1
Saccharomycetes	Saccharomycopsis synnaedendra CBS 6161	GCA_031124815.1
Saccharomycetes	Priceomyces melissophilus ZIM 1115	GCA_031081885.1
Saccharomycetes	Debaryomyces singareniensis NCAIM Y.02012	GCA_031081795.1
Saccharomycetes	Pichia membranifaciens NCYC 55	GCA_031021045.1
Saccharomycetes	Wickerhamiella versatilis HR3	GCA_030867685.1
Saccharomycetes	Kodamaea ohmeri 3873	GCA_030867675.1
Saccharomycetes	Starmerella magnoliae MDK 2023a	GCA_030762955.1
Saccharomycetes	Kluyveromyces starmeri UFMG CM Y3682	GCA_030705165.1
Saccharomycetes	Starmerella geochares NRRL Y 17073	GCA_030705075.1
Saccharomycetes	Nakazawaea laoshanensis NRRL Y 63634	GCA_030704985.1
Saccharomycetes	Candida pseudoaaseri CBS 11170	GCA_030674785.1
Saccharomycetes	Scheffersomyces lignosus NRRL Y 12856	GCA_030674765.1
Saccharomycetes	Ogataea thermomethanolica nom. inval. NRRL Y 27981	GCA_030674565.1
Saccharomycetes	Ogataea saltuana NRRL Y 48448	GCA_030674545.1
Saccharomycetes	Candida ascalaphidarum NRRL Y 27908	GCA_030674335.1
Saccharomycetes	Suhomyces faveliae CBS 14299	GCA_030585145.1
Saccharomycetes	Wickerhamiella shivajii CBS 15893	GCA_030585105.1
Saccharomycetes	Starmerella roubikii CBS 15148	GCA_030584945.1
Saccharomycetes	Starmerella vitae CBS 15147	GCA_030584925.1
Saccharomycetes	Debaryomyces maramus NRRL Y 2171	GCA_030583545.1
Saccharomycetes	Debaryomyces nepalensis NRRL Y 7108	GCA_030583445.1
Saccharomycetes	Metschnikowia drosophilae NRRL Y 27458 T	GCA_030583105.1
Saccharomycetes	Candida taylorii NRRL Y 27213	GCA_030583035.1
Saccharomycetes	Metschnikowia torresii NRRL Y 6699T	GCA_030582935.1
Saccharomycetes	Candida krabiensis NRRL Y 27965	GCA_030582815.1
Saccharomycetes	Candida endomychidarum NRRL Y 27708	GCA_030582775.1
Saccharomycetes	Kodamaea sp. yHQL449 yHQL449	GCA_030582715.1
Saccharomycetes	Suhomyces sp. yHQL142 yHQL142	GCA_030582675.1
Saccharomycetes	Suhomyces terraborum NRRL Y 27573	GCA_030582495.1
Saccharomycetes	Suhomyces panamericanus NRRL Y 27567	GCA_030582475.1
Saccharomycetes	Wickerhamiella vanderwaltii NRRL Y 17671	GCA_030582415.1
Saccharomycetes	Candida spencermartinsiae NRRL Y 48663	GCA_030582355.1
Saccharomycetes	Yamadazymakazawae NRRL Y 7903	GCA_030582335.1
Saccharomycetes	Wickerhamiella spandovensis NRRL Y 17761	GCA_030582135.1
Saccharomycetes	Wickerhamiella occidentalis NRRL Y 27364	GCA_030582035.1
Saccharomycetes	Pichia terricola NRRL YB 4310	GCA_030581875.1
Saccharomycetes	Candida blattariae NRRL Y 27703	GCA_030581595.1
Saccharomycetes	Candida patagonica nom. inval. CBS 10443	GCA_030580475.1
Saccharomycetes	Yamadazyma sp. yHKS699 yHKS699	GCA_030580295.1
Saccharomycetes	Suhomyces sp. yHMH580 yHMH580	GCA_030580235.1
Saccharomycetes	Candida sp. uncertain placement NRRL Y 12764	GCA_030579995.1
Saccharomycetes	Tortispora caseinolytica NRRL Y 17796	GCA_030579835.1
Saccharomycetes	Sugiyamaella smithiae NRRL Y 17850	GCA_030579815.1
Saccharomycetes	Sporopachydermia quercuum NRRL Y 17847	GCA_030579615.1
Saccharomycetes	Spathaspora passalidarum NRRL Y 27907	GCA_030579515.1
Saccharomycetes	Ogataea populi albae NRRL Y 48632	GCA_030579375.1
Saccharomycetes	Lachancea nothofagi NRRL Y 48670	GCA_030579335.1
Saccharomycetes	Kazachstania psychrophila CBS 12689	GCA_030579255.1
Saccharomycetes	Metschnikowia hawaiiana NRRL Y 27473	GCA_030579175.1
Saccharomycetes	Candida danieliae CBS 8533	GCA_030579135.1
Saccharomycetes	Brettanomycesnus NRRL Y 17527	GCA_030579115.1
Saccharomycetes	Starmerella davenportii CBS 9069	GCA_030579095.1
Saccharomycetes	Debaryomyces prosopidis NRRL Y 27369	GCA_030578795.1
Saccharomycetes	Sugiyamaella chiloensis NRRL Y 17643	GCA_030578775.1
Saccharomycetes	Scheffersomyces coipomensis NRRL Y 17651	GCA_030578755.1
Saccharomycetes	Kodamaea sp. yHQL451 yHQL451	GCA_030578635.1
Saccharomycetes	Saccharomycopsis guyanensis CBS 12914	GCA_030578595.1
Saccharomycetes	Ogataea neopini AB440274	GCA_030578575.1
Saccharomycetes	Starmerella sirachaensis NBRC 108605 AB617909	GCA_030578495.1
Saccharomycetes	Sugiyamaella boreocaroliniensis NRRL YB 1835	GCA_030575195.1
Saccharomycetes	Suhomyces vadensis NRRL Y 27778	GCA_030575035.1
Saccharomycetes	Suhomyces maxii NRRL Y 27588	GCA_030574995.1
Saccharomycetes	Candida insectorum NRRL Y 7787	GCA_030574895.1
Saccharomycetes	Candida cerambycidarum NRRL Y 27706	GCA_030574835.1
Saccharomycetes	Candida germanica NRRL Y 27064	GCA_030574815.1
Saccharomycetes	Candida atmosphaerica NRRL Y 17642	GCA_030574775.1
Saccharomycetes	Candida silvicultrix NRRL Y 7789	GCA_030574755.1
Saccharomycetes	Wickerhamiella pararugosa NRRL Y 17089T	GCA_030574655.1
Saccharomycetes	Tortispora phaffii NRRL Y 48833	GCA_030574555.1
Saccharomycetes	Tortispora starmeri NRRL Y 63665	GCA_030574535.1
Saccharomycetes	Priceomyces melissophilus NRRL Y 7585	GCA_030574515.1
Saccharomycetes	Priceomyces fermenticarens NRRL Y 17321	GCA_030574455.1
Saccharomycetes	Priceomyces castillae NRRL Y 7501	GCA_030574375.1
Saccharomycetes	Meyerozyma elateridarum NRRL Y 27647	GCA_030574335.1
Saccharomycetes	Ogataea siamensis NRRL Y 27963	GCA_030574315.1
Saccharomycetes	Candida insectalens NRRL Y 7778T	GCA_030574155.1
Saccharomycetes	Cyberlindnera petersonii NRRL YB 3808	GCA_030574135.1
Saccharomycetes	Zygosaccharomyces siamensis CBS 12273	GCA_030574045.1
Saccharomycetes	Tortispora ganteri NRRL Y 17035	GCA_030573865.1
Saccharomycetes	Priceomyces haplophilus NRRL Y 7860	GCA_030573735.1
Saccharomycetes	Pichia membranifaciens NRRL Y 2026	GCA_030573715.1
Saccharomycetes	Meyerozyma carpophila NRRL Y 17905	GCA_030573695.1
Saccharomycetes	Hanseniaspora pseudoguilliermondii CBS 8772	GCA_030573455.1
Saccharomycetes	Candida chilensis NRRL Y 17141	GCA_030573195.1
Saccharomycetes	Metschnikowia anglica CBS 15342	GCA_030573055.1
Saccharomycetes	Pichianzhaoensis CBS 15346	GCA_030573035.1
Saccharomycetes	Wickerhamiella kurtzmanii CBS 15383	GCA_030572965.1
Saccharomycetes	Hanseniaspora mollemarum CBS 15034	GCA_030572935.1
Saccharomycetes	Komagataella mondaviorum CBS 15017	GCA_030572915.1
Saccharomycetes	Zygosaccharomyces parabailii CBS 12809	GCA_030572715.1
Saccharomycetes	Ogataea allantospora NRRL Y 48267	GCA_030572655.1
Saccharomycetes	Candida sake NRRL Y 1622	GCA_030572495.1
Saccharomycetes	Candida koratica nom. ined. NBRC 103208	GCA_030572455.1
Saccharomycetes	Candida membranifaciens NRRL Y 2089	GCA_030572415.1
Saccharomycetes	Candida michaelii NRRL Y 27705	GCA_030572395.1
Saccharomycetes	Candida dendronema NRRL Y 7781	GCA_030572355.1
Saccharomycetes	Cyberlindnerakhonratchasimensis nom. inval. JCM 12474	GCA_030572335.1
Saccharomycetes	Candida glucosophila NRRL Y 17219	GCA_030572315.1
Saccharomycetes	Candida multigemmis NRRL Y 17659	GCA_030572295.1
Saccharomycetes	Candida conglobata NRRL Y 1504	GCA_030572275.1
Saccharomycetes	Kodamaea fukazawae JCM 1641	GCA_030572255.1
Saccharomycetes	Suhomyces taliae NRRL Y 27589T	GCA_030572155.1
Saccharomycetes	Starmerella apicola NRRL Y 2481	GCA_030572115.1
Saccharomycetes	Yamadazyma ubonensis CBS 12859	GCA_030572075.1
Saccharomycetes	Yamadazyma kitorensis JCM 31005	GCA_030572015.1
Saccharomycetes	Yamadazyma olivae CBS 11171	GCA_030571975.1
Saccharomycetes	Yamadazyma phyllophila CBS 12572	GCA_030571955.1
Saccharomycetes	Yamadazyma epiphylla CBS 13384	GCA_030571925.1
Saccharomycetes	Suhomyces yuchorum NRRL Y 27569	GCA_030571845.1
Saccharomycetes	Yamadazyma dushanensis CBS 13914	GCA_030571835.1
Saccharomycetes	Wickerhamiella siamensis CBS 13331	GCA_030571815.1
Saccharomycetes	Wickerhamiella slavikovae CBS 12417	GCA_030571795.1
Saccharomycetes	Kazachstania africana NRRL Y 8276	GCA_030571735.1
Saccharomycetes	Zygosaccharomyces gambellarensis CBS 12191	GCA_030571545.1
Saccharomycetes	Candida citri CBS 11858	GCA_030571295.1
Saccharomycetes	Zygotorulaspora sp. UFMG CM Y6047 UFMG CM Y6047	GCA_030571275.1
Saccharomycetes	Nakazawaea sp. yHDR128 yHDR128	GCA_030571255.1
Saccharomycetes	Yamadazyma endophytica CBS 14163	GCA_030571075.1
Saccharomycetes	Ogataea sp. yHMJ1 yHMJ1	GCA_030571015.1
Saccharomycetes	Candida railenensis NRRL Y 17762T	GCA_030570995.1
Saccharomycetes	Candida tibetensis CBS 10298	GCA_030570835.1
Saccharomycetes	Wickerhamomyces silvicola NRRL Y 1678	GCA_030570795.1
Saccharomycetes	Candida methanosorbosa NRRL Y 17320	GCA_030570755.1
Saccharomycetes	Ogataea saltuana NRRL YB 2437	GCA_030570735.1
Saccharomycetes	Tortispora mauiana NRRL Y 48832	GCA_030570615.1
Saccharomycetes	Priceomyces medius NRRL Y 7122	GCA_030570455.1
Saccharomycetes	Pichia sp. NRRL Y 12827 NRRL Y 12827	GCA_030570315.1
Saccharomycetes	Meyerozyma smithsonii NRRL Y 27642	GCA_030570235.1
Saccharomycetes	Ogataea methylovora NRRL Y 11996	GCA_030570175.1
Saccharomycetes	Kodamaea derodonti NRRL Y 27711	GCA_030570035.1
Saccharomycetes	Lachancea meyersii NRRL Y 27269	GCA_030570015.1
Saccharomycetes	Kluyveromyces nonfermentans NRRL Y 27343	GCA_030569915.1
Saccharomycetes	Nakazawaea siamensis CBS 12569	GCA_030569775.1
Saccharomycetes	Cyberlindnera bimundalis NRRL Y 5343	GCA_030569745.1
Saccharomycetes	Candida vaughaniae CBS 8583	GCA_030569695.1
Saccharomycetes	Candida ulmi CBS 8670	GCA_030569675.1
Saccharomycetes	Candida tallmaniae CBS 8575 T	GCA_030569655.1
Saccharomycetes	Candida oceani CBS 11857	GCA_030569555.1
Saccharomycetes	Yamadazyma mexicana NRRL Y 11818	GCA_030569415.1
Saccharomycetes	Ogataea ganodermae CBS 10646	GCA_030569375.1
Saccharomycetes	Candida verbasci CBS 12699	GCA_030569305.1
Saccharomycetes	Candida yuanshanica CBS 10589	GCA_030569295.1
Saccharomycetes	Sugiyamaella qingdaonensis CBS 11390	GCA_030569235.1
Saccharomycetes	Candida manassasensis CBS 12534	GCA_030569175.1
Saccharomycetes	Candida sphagnicola CBS 11774 T	GCA_030569075.1
Saccharomycetes	Candida andamanensis nom. inval. CBS 10859	GCA_030569055.1
Saccharomycetes	Millerozyma miso CBS 2004	GCA_030569015.1
Saccharomycetes	Starmerella lactis condensi NRRL Y 1515	GCA_030568935.1
Saccharomycetes	Starmerella powellii nom. inval. CBS 8795T	GCA_030568915.1
Saccharomycetes	Candida suthepensis CBS 12270 T	GCA_030568895.1
Saccharomycetes	Candida galis NRRL Y 48037T	GCA_030568845.1
Saccharomycetes	Kodamaea hsintzibuensis nom. inval. CBS 11427 T	GCA_030568835.1
Saccharomycetes	Suhomyces wounanorum NRRL Y 27574	GCA_030568695.1
Saccharomycetes	Suhomyces xylopsoci NRRL Y 27066	GCA_030568675.1
Saccharomycetes	Suhomyces prunicola NRRL YB 869	GCA_030568655.1
Saccharomycetes	Candida caryicola NRRL YB 1499	GCA_030568635.1
Saccharomycetes	Suhomyces bokatorum NRRL Y 27571	GCA_030568615.1
Saccharomycetes	Suhomyces ambrosiae NRRL YB 1316	GCA_030568575.1
Saccharomycetes	Suhomyces bolitotheri NRRL Y 27587	GCA_030568555.1
Saccharomycetes	Suhomyces anneliseae NRRL Y 27563	GCA_030568535.1
Saccharomycetes	Suhomyces guaymorum NRRL Y 27568	GCA_030568515.1
Saccharomycetes	Suhomyces chickasaworum NRRL Y 27566	GCA_030568495.1
Saccharomycetes	Suhomyces choctaworum NRRL Y 27584	GCA_030568475.1
Saccharomycetes	Zygosaccharomyces lentus NRRL Y 27276	GCA_030568175.1
Saccharomycetes	Candida suzukii NRRL Y 27593	GCA_030568155.1
Saccharomycetes	Ogataea dorogensis NRRL Y 27599	GCA_030568015.1
Saccharomycetes	Candida pini NRRL Y 2023	GCA_030567935.1
Saccharomycetes	Candida nitratophila NRRL YB 3654	GCA_030567875.1
Saccharomycetes	Candida sonorensis NRRL Y 7800	GCA_030567855.1
Saccharomycetes	Candida nemodendra NRRL Y 7779	GCA_030567775.1
Saccharomycetes	Nakazawaea pomicola NRRL Y 27083	GCA_030567755.1
Saccharomycetes	Nakazawaea peltata NRRL Y 6888	GCA_030567735.1
Saccharomycetes	Nakazawaea wickerhamii NRRL Y 2563	GCA_030567635.1
Saccharomycetes	Komagataella ulmi NRRL YB 407	GCA_030567575.1
Saccharomycetes	Kuraishia hungarica NRRL Y 27594	GCA_030567555.1
Saccharomycetes	Kuraishia floccosa NRRL Y 27951	GCA_030567535.1
Saccharomycetes	Kuraishia capsulata NRRL Y 1842	GCA_030567515.1
Saccharomycetes	Hanseniaspora guilliermondii NRRL Y 1625	GCA_030567255.1
Saccharomycetes	Starmerella tilneyi nom. inval. CBS 8794	GCA_030566755.1
Saccharomycetes	Candida jiufengensis CBS 10846	GCA_030566715.1
Saccharomycetes	Metschnikowia kipukae NRRL Y 27474T	GCA_030566465.1
Saccharomycetes	Metschnikowia aberdeeniae NRRL Y 27921 T	GCA_030566455.1
Saccharomycetes	Debaryomyces robertsiae NRRL Y 6670	GCA_030566065.1
Saccharomycetes	Candida tammaniensis NRRL Y 8257	GCA_030566005.1
Saccharomycetes	Candida friedrichii NRRL Y 17653	GCA_030565865.1
Saccharomycetes	Zygotorulaspora chibaensis CBS 15364	GCA_030565665.1
Saccharomycetes	Kodamaea neixiangensis CBS 14699	GCA_030565385.1
Saccharomycetes	Suhomyces coccinellae CBS 14298	GCA_030565345.1
Saccharomycetes	Starmerella scarabaei CBS 14174	GCA_030565305.1
Saccharomycetes	Wickerhamiella brachini CBS 14176	GCA_030565285.1
Saccharomycetes	Cyberlindnera galapagoensis CBS 13997	GCA_030565205.1
Saccharomycetes	Candida parachauliodes CBS 13928	GCA_030565145.1
Saccharomycetes	Scheffersomyces virginianus NRRL Y 48822	GCA_030565005.1
Saccharomycetes	Ogataeakhonphanomensis CBS 10362	GCA_030564965.1
Saccharomycetes	Candida sorboxylosa NRRL Y 17669	GCA_030564865.1
Saccharomycetes	Scheffersomyces segobiensis NRRL Y 11571	GCA_030564745.1
Saccharomycetes	Starmerella apis NRRL Y 2482	GCA_030564665.1
Saccharomycetes	Candida morakotiae NRRL Y 48708	GCA_030564645.1
Saccharomycetes	Debaryomyces coudertii NRRL Y 7425	GCA_030564605.1
Saccharomycetes	Kodamaea leandrae NRRL Y 27757	GCA_030564445.1
Saccharomycetes	Millerozyma acaciae NRRL Y 7117	GCA_030564405.1
Saccharomycetes	Candida glaebosa NRRL Y 6949	GCA_030564305.1
Saccharomycetes	Blastobotrys parvus NRRL Y 1004	GCA_030564285.1
Saccharomycetes	Kluyveromyces wickerhamii NRRL Y 8286	GCA_030564205.1
Saccharomycetes	Candida mattraensis nom. inval. CBS 12097	GCA_030564055.1
Saccharomycetes	Candida oleophila NRRL Y 2317	GCA_030563865.1
Saccharomycetes	Kodamaea alishanica nom. inval. CBS 11429	GCA_030563745.1
Saccharomycetes	Candida awuae CBS 11011	GCA_030563725.1
Saccharomycetes	Suhomyces kilbournensis NRRL Y 17864T	GCA_030563685.1
Saccharomycetes	Yamadazyma paraphyllophila CBS 9928 T	GCA_030563605.1
Saccharomycetes	Starmerella stigmatis nom. inval. CBS 11464 T	GCA_030563545.1
Saccharomycetes	Candida lessepsii NRRL Y 27766 T	GCA_030563485.1
Saccharomycetes	Candida diddensiae NRRL Y 7589T	GCA_030563465.1
Saccharomycetes	Candida lundiana CBS 12271 T	GCA_030563415.1
Saccharomycetes	Starmerella khaoyaiensis NBRC 104213 DQ400367	GCA_030563285.1
Saccharomycetes	Wickerhamiella azymoides CBS 10508T	GCA_030563245.1
Saccharomycetes	Candida hungchunana CBS 12243	GCA_030563225.1
Saccharomycetes	Metschnikowia lopburiensis CBS 12574	GCA_030563105.1
Saccharomycetes	Pichia sp. NRRL Y 27259 NRRL Y 27259	GCA_030563085.1
Saccharomycetes	Metschnikowia agaves NRRL Y 17915	GCA_030561985.1
Saccharomycetes	Candida ortonii NRRL Y 48038	GCA_030561785.1
Saccharomycetes	Candida hainanensis NRRL Y 48715	GCA_030561765.1
Saccharomycetes	Suhomyces kunorum NRRL Y 27580	GCA_030561465.1
Saccharomycetes	Candida atlantica NRRL Y 17759	GCA_030561325.1
Saccharomycetes	Wickerhamiella bombiphila NRRL Y 27640	GCA_030561035.1
Saccharomycetes	Starmerella vaccinii NRRL Y 17684	GCA_030561025.1
Saccharomycetes	Pichia scutulata NRRL Y 7663	GCA_030560845.1
Saccharomycetes	Candida fluviatilis NRRL Y 7711	GCA_030560825.1
Saccharomycetes	Kodamaea fungicola JCM 10142	GCA_030560575.1
Saccharomycetes	Candida mesenterica NRRL Y 1494	GCA_030559045.1
Saccharomycetes	Ogataea wickerhamii NRRL YB 4943	GCA_030559035.1
Saccharomycetes	Blastobotrys indianensis NRRL YB 1950	GCA_030558855.1
Saccharomycetes	Kodamaea laetipori NRRL Y 27713	GCA_030558845.1
Saccharomycetes	Kodamaea kakaduensis CBS 8611	GCA_030558435.1
Saccharomycetes	Candida stauntonica CBS 12241	GCA_030558335.1
Saccharomycetes	Candida palmyrensis CBS 11546	GCA_030558275.1
Saccharomycetes	Candida adriatica CBS 12504	GCA_030558135.1
Saccharomycetes	Debaryomyces singareniensis CBS 10405	GCA_030558045.1
Saccharomycetes	Candida succiphila NRRL Y 11998	GCA_030557525.1
Saccharomycetes	Candida maris NRRL Y 6696T	GCA_030557505.1
Saccharomycetes	Candidanaspora NRRL Y 17679	GCA_030557475.1
Saccharomycetes	Kuraishia cidri NRRL Y 27078	GCA_030557465.1
Saccharomycetes	Nakazawaea populi NRRL Y 17681	GCA_030557235.1
Saccharomycetes	Komagataella kurtzmanii NRRL Y 63667	GCA_030557195.1
Saccharomycetes	Candida chauliodis NRRL Y 27909	GCA_030557115.1
Saccharomycetes	Hyphopichia buzzinii CBS 14300	GCA_030556945.1
Saccharomycetes	Kodamaea jinghongensis CBS 14700	GCA_030556895.1
Saccharomycetes	Sugiyamaella floridensis NRRL YB 3827	GCA_030556845.1
Saccharomycetes	Debaryomyces udenii NRRL Y 17354	GCA_030556595.1
Saccharomycetes	Kodamaea sagamina JCM 10144	GCA_030556545.1
Saccharomycetes	Candida pseudofarinosa NCYC 386	GCA_030556505.1
Saccharomycetes	Scheffersomyces cryptocercus NRRL Y 48824	GCA_030555905.1
Saccharomycetes	Ogataea paradorogensis CBS 10978	GCA_030555885.1
Saccharomycetes	Ogataea corticis NBRC 1794	GCA_030555865.1
Saccharomycetes	Yamadazyma sp. yHKB15 yHKB15	GCA_030555745.1
Saccharomycetes	Blastobotrys adeninivorans NRRL Y 17692	GCA_030555625.1
Saccharomycetes	Starmerella etchellsii NRRL Y 17084	GCA_030490775.1
Saccharomycetes	Metschnikowia bicuspidata MQ2101	GCA_030463115.1
Saccharomycetes	Hyphopichia fennica NRRL Y 7505	GCA_030444945.1
Saccharomycetes	Lodderomyces elongisporus NRRL YB 4239	GCA_030384665.1
Saccharomycetes	Hanseniaspora meyeri	GCA_030370665.1
Saccharomycetes	Pichia terricola 0621	GCA_030168465.1
Saccharomycetes	Pichia occidentalis ApC	GCA_030142935.1
Saccharomycetes	Pichia kluyveri	GCA_030062975.1
Saccharomycetes	Saccharomyces bayanus L1	GCA_029873595.1
Saccharomycetes	Magnusiomyces sp. LA 1 LA 1	GCA_029678045.1
Saccharomycetes	Pichia occidentalis NRRL Y 6545	GCA_029581965.1
Saccharomycetes	Pichia fermentans NCYC 562	GCA_029581925.1
Saccharomycetes	Scheffersomyces amazonensis CBS 12363	GCA_029581795.1
Saccharomycetes	Candida boleticola CBS 7847	GCA_029581775.1
Saccharomycetes	Lipomyces tetrasporus NRRL Y 64009	GCA_029532465.1
Saccharomycetes	Komagataella pastoris BF 19 04Y	GCA_028829515.1
Saccharomycetes	Saccharomyces uvarum CBS7001	GCA_027557585.1
Saccharomycetes	Meyerozyma caribbica MC5703	GCA_027475045.1
Saccharomycetes	Candida parapsilosis 2NR911	GCA_025767985.1
Saccharomycetes	Candida palmioleophila CBS 18098	GCA_025602875.1
Saccharomycetes	Pichia manshurica F8012	GCA_025531675.1
Saccharomycetes	Pichia manshurica B7015	GCA_025531645.1
Saccharomycetes	Candida blankii ABL	GCA_024734315.1
Saccharomycetes	Candida margitis CBS 14175	GCA_024628925.1
Saccharomycetes	Candida theae CBS 12239	GCA_024610275.1
Saccharomycetes	Candida jiufengensis CBS 10846	GCA_024610255.1
Saccharomycetes	Candida pseudojiufengensis CBS 10847	GCA_024610245.1
Saccharomycetes	Kodamaea ohmeri KO20	GCA_024542785.1
Saccharomycetes	Cyberlindnera jadinii NBRC 0988	GCA_024346625.1
Saccharomycetes	Kazachstania sp. Y4206 Y4206	GCA_023629195.1
Saccharomycetes	Lachancea fermentati M7023	GCA_023629175.1
Saccharomycetes	Wickerhamiella sorbophila DX8004	GCA_023629035.1
Saccharomycetes	Wickerhamiella pararugosa PH2204	GCA_023628955.1
Saccharomycetes	Meyerozyma caribbica B8028	GCA_023623335.1
Saccharomycetes	Candida aaseri B8007	GCA_023623315.1
Saccharomycetes	Saccharomycopsis fibuligera ACX0001	GCA_023497445.1
Saccharomycetes	Candida oxycetoniae CBS 10844	GCA_023343755.2
Saccharomycetes	Yarrowia lipolytica 22301 5	GCA_023272835.1
Saccharomycetes	Komagataella ulmi CBS 12361	GCA_023213065.1
Saccharomycetes	Komagataella mondaviorum CBS 15017	GCA_023213015.1
Saccharomycetes	Komagataella populi CBS 12362	GCA_023212995.1
Saccharomycetes	Komagataella kurtzmanii CBS 12817	GCA_023212975.1
Saccharomycetes	Komagataella pseudopastoris CBS 9187	GCA_023212875.1
Saccharomycetes	Nakazawaea ishiwadae GDMCC 60786	GCA_022817945.1
Saccharomycetes	Cyberlindnera fabianii ecotype Missouri	GCA_022641835.1
Saccharomycetes	Wickerhamiella azyma PYCC 8333	GCA_022577855.1
Saccharomycetes	Wickerhamiella nectarea PYCC 8436	GCA_022577815.1
Saccharomycetes	Wickerhamiella kurtzmanii PYCC 8437	GCA_022577765.1
Saccharomycetes	Wickerhamiella dianesei PYCC 8330	GCA_022577725.1
Saccharomycetes	Wickerhamiella alocasiicola PYCC 8427	GCA_022577715.1
Saccharomycetes	Wickerhamiella spandovensis PYCC 8431	GCA_022577695.1
Saccharomycetes	Metschnikowia bicuspidata LNES0119	GCA_022575955.1
Saccharomycetes	Geotrichum sp. CBS 16003 CBS 16003	GCA_022457085.1
Saccharomycetes	Candida membranifaciens subsp. flavinogenes IST 626	GCA_022457055.1
Saccharomycetes	Meyerozyma guilliermondii A3	GCA_022315155.1
Saccharomycetes	Wickerhamomyces anomalus MBY2396	GCA_021208015.1
Saccharomycetes	Cyberlindnera sargentensis SHA 17.2	GCA_020995425.1
Saccharomycetes	Zygosaccharomyces mellis CBS736	GCA_020521395.1
Saccharomycetes	Saccharomycopsis phalluae GUCC 202006	GCA_020342235.1
Saccharomycetes	Candida oceani 2020i151	GCA_020281285.1
Saccharomycetes	Saccharomyces uvarum CBS 7001	GCA_019953615.1
Saccharomycetes	Brettanomyces bruxellensis AWRI1499	GCA_019923895.1
Saccharomycetes	Brettanomyces bruxellensis AWRI1499	GCA_019923885.1
Saccharomycetes	Zygosaccharomyces rouxii CCTCC M2013310	GCA_019775865.1
Saccharomycetes	Hanseniaspora mollemarum CBS 15034	GCA_019649515.1
Saccharomycetes	Saccharomyces bayanus FM677	GCA_019431265.1
Saccharomycetes	Candida africana CEC4854	GCA_019359905.1
Saccharomycetes	Wickerhamomyces anomalus KG16	GCA_019321675.1
Saccharomycetes	Ogataea angusta	GCA_019207475.1
Saccharomycetes	Ogataea angusta	GCA_019207455.1
Saccharomycetes	Ogataea haglerorum	GCA_019206915.1
Saccharomycetes	Ogataea haglerorum	GCA_019206905.1
Saccharomycetes	Scheffersomyces spartinae ARV 011	GCA_019049425.1
Saccharomycetes	Lipomyces starkeyi AS 2.1560	GCA_018804115.1
Saccharomycetes	Yarrowia sp. B02 B02	GCA_017635955.1
Saccharomycetes	Kluyveromyces marxianus ATCC 8635	GCA_017309885.1
Saccharomycetes	Ogataea polymorpha CBS 4732	GCA_017161175.1
Saccharomycetes	Brettanomyces sp. HC 2020a kh3	GCA_016906875.1
Saccharomycetes	Lachancea thermotolerans COLC27	GCA_016630865.1
Saccharomycetes	Kluyveromyces marxianus CBS6556	GCA_016625955.1
Saccharomycetes	Blastobotrys adeninivorans TMCC 70007	GCA_016162255.1
Saccharomycetes	Debaryomyces hansenii C11	GCA_016097625.1
Saccharomycetes	Candida mesenterica UWOPS91 121.2	GCA_015708695.1
Saccharomycetes	Saccharomyces eubayanus 450.1	GCA_015353045.1
Saccharomycetes	Saccharomyces eubayanus 216.1	GCA_015353015.1
Saccharomycetes	Torulaspora globosa CBS764	GCA_014133895.1
Saccharomycetes	Torulaspora globosa CBS2947	GCA_013694445.1
Saccharomycetes	Zygotorulaspora mrakii NRRL Y 6702	GCA_013402915.1
Saccharomycetes	Torulaspora franciscae CBS 2926	GCA_013387355.1
Saccharomycetes	Candida theae	GCA_013368535.1
Saccharomycetes	Geotrichum candidum LMA 244	GCA_013365045.1
Saccharomycetes	Candida sojae NCYC 2607	GCA_013177575.1
Saccharomycetes	Torulaspora pretoriensis CBS 11100	GCA_012851095.1
Saccharomycetes	Torulaspora pretoriensis CBS 11121	GCA_012851065.1
Saccharomycetes	Brettanomycesardenensis CRL 65	GCA_012295355.1
Saccharomycetes	Brettanomycesnus CBS 1945	GCA_011074865.2
Saccharomycetes	Brettanomyces anomalus CBS 8139	GCA_011074815.1
Saccharomycetes	Brettanomycesardenensis CBS 6042	GCA_011074775.1
Saccharomycetes	Brettanomyces custersianus CBS 4805	GCA_011074765.1
Saccharomycetes	Saccharomyces pastorianus CBS 1483	GCA_011022315.1
Saccharomycetes	Saccharomycopsis crataegensis CBS 6447	GCA_010994405.1
Saccharomycetes	Saccharomycopsis schoenii CBS 7425	GCA_010994365.1
Saccharomycetes	Cyberlindnera americana ChDrAdgY46	GCA_009281745.1
Saccharomycetes	Kluyveromyces starmeri UFMG CM Y3682	GCA_008973615.1
Saccharomycetes	Metschnikowia caudata EBD CdVSA08 1	GCA_008065185.1
Saccharomycetes	Metschnikowia caudata EBD CdVSA57 2	GCA_008065175.1
Saccharomycetes	Kluyveromyces lactis CBS 2105	GCA_007993695.1
Saccharomycetes	Yarrowia galli HXPF 0137	GCA_007844265.1
Saccharomycetes	Scheffersomyces stipitis CBS 6054 CBS 6054	GCA_006942115.1
Saccharomycetes	Zygosaccharomyces mellis Ca 7	GCA_005406105.1
Saccharomycetes	Metschnikowia sp. JCM 33374 JCM 33374	GCA_005406065.1
Saccharomycetes	Candida orthopsilosis Co 90 125 Co 90 125	GCA_004334915.1
Saccharomycetes	Metschnikowia aff. pulcherrima APC 1.2	GCA_004217705.1
Saccharomycetes	Starmerella kuoi NRRL Y 27208	GCA_004124915.1
Saccharomycetes	Starmerella bombicola NRRL Y 17069	GCA_004124885.1
Saccharomycetes	Saccharomycopsis malanga KCN26	GCA_004014935.1
Saccharomycetes	Hyphopichia burtonii	GCA_003856795.1
Saccharomycetes	Hyphopichia pseudoburtonii	GCA_003856775.1
Saccharomycetes	Priceomyces carsonii NRRL YB 4275	GCA_003709225.3
Saccharomycetes	Candida gorgasii NRRL Y 27707	GCA_003708985.3
Saccharomycetes	Debaryomyces subglobosus NRRL Y 6666	GCA_003708965.2
Saccharomycetes	Cyberlindnera americana NRRL Y 2156	GCA_003708795.3
Saccharomycetes	Candida wancherniae NRRL Y 48709	GCA_003708715.3
Saccharomycetes	Candida tammaniensis NRRL Y 8257	GCA_003708705.1
Saccharomycetes	Debaryomyces nepalensis NRRL Y 7108	GCA_003708585.1
Saccharomycetes	Cyberlindnera mycetangii NRRL Y 6843	GCA_003708295.3
Saccharomycetes	Cyberlindnera xylosilytica NRRL YB 2097	GCA_003708285.2
Saccharomycetes	Candida vartiovaarae NRRL Y 6701	GCA_003708265.3
Saccharomycetes	Candida orba NRRL Y 27336	GCA_003708145.3
Saccharomycetes	Torulaspora maleeae CBS 10694	GCA_003708055.3
Saccharomycetes	Wickerhamomyces bovis NRRL YB 4184	GCA_003707945.3
Saccharomycetes	Ambrosiozyma pseudovanderkliftii NRRL Y 63632	GCA_003707895.3
Saccharomycetes	Suhomyces emberorum NRRL Y 27606	GCA_003707835.3
Saccharomycetes	Cephaloascus fragrans NRRL Y 6742	GCA_003707825.3
Saccharomycetes	Cyberlindnera misumaiensis NRRL Y 17389	GCA_003707745.2
Saccharomycetes	Candida freyschussii NRRL Y 7957A	GCA_003707735.2
Saccharomycetes	Ambrosiozyma philentoma NRRL Y 7523	GCA_003707675.3
Saccharomycetes	Ogataea pini NRRL Y 11528	GCA_003707665.2
Saccharomycetes	Zygosaccharomyces bisporus NRRL Y 12626	GCA_003707595.2
Saccharomycetes	Kluyveromyces aestuarii NRRL YB 4510	GCA_003707555.2
Saccharomycetes	Lipomyces oligophaga NRRL Y 17247	GCA_003707545.3
Saccharomycetes	Blastobotrys proliferans NRRL Y 17577	GCA_003707485.3
Saccharomycetes	Kodamaea restingae NRRL Y 27358	GCA_003707425.3
Saccharomycetes	Candida schatavii NRRL Y 17078	GCA_003707405.2
Saccharomycetes	Yamadazyma scolyti NRRL Y 5512	GCA_003707025.2
Saccharomycetes	Wickerhamomyces canadensis NRRL Y 1888	GCA_003707015.3
Saccharomycetes	Yamadazyma philogaea NRRL Y 7813	GCA_003706995.3
Saccharomycetes	Candida hispaniensis NRRL Y 5580	GCA_003706965.1
Saccharomycetes	Priceomyces castillae NRRL Y 7501	GCA_003706855.2
Saccharomycetes	Wickerhamomyces hampshirensis NRRL YB 4128	GCA_003706765.3
Saccharomycetes	Candida incommunis NRRL Y 17085	GCA_003706695.3
Saccharomycetes	Ambrosiozyma maleeae nom. inval. NRRL Y 63635	GCA_003706635.2
Saccharomycetes	Candida montana NRRL Y 17326	GCA_003706615.3
Saccharomycetes	Suhomyces canberraensis NRRL YB 2417	GCA_003706525.2
Saccharomycetes	Suhomyces pyralidae NRRL Y 27085	GCA_003706505.3
Saccharomycetes	Candida corydali NRRL Y 27910	GCA_003706475.3
Saccharomycetes	Danielozyma ontarioensis NRRL YB 1246	GCA_003706395.2
Saccharomycetes	Kuraishia molischiana NRRL Y 27899	GCA_003706305.3
Saccharomycetes	Kuraishia ogatae NRRL Y 48474	GCA_003706285.3
Saccharomycetes	Ogataea nonfermentans NRRL YB 2203	GCA_003706255.2
Saccharomycetes	Ogataeaganishii NRRL Y 7654	GCA_003706235.2
Saccharomycetes	Ogataea methylovora NRRL Y 17250	GCA_003706205.2
Saccharomycetes	Ogataea minuta NRRL Y 411	GCA_003706195.2
Saccharomycetes	Ogataea kodamae NRRL Y 17234	GCA_003706165.3
Saccharomycetes	Ogataea philodendri NRRL Y 7210	GCA_003706115.3
Saccharomycetes	Ogataea ramenticola NRRL YB 1985	GCA_003706105.3
Saccharomycetes	Ogataea trehaloabstinens NRRL Y 27595	GCA_003706095.2
Saccharomycetes	Tetrapisispora iriomotensis NRRL Y 27309	GCA_003705975.2
Saccharomycetes	Kluyveromyces dobzhanskii NRRL Y 1974	GCA_003705805.3
Saccharomycetes	Blastobotrys americana NRRL Y 6844	GCA_003705795.3
Saccharomycetes	Blastobotrys peoriensis NRRL YB 2290	GCA_003705735.3
Saccharomycetes	Blastobotrys raffinosifermentans NRRL Y 27150	GCA_003705705.2
Saccharomycetes	Kodamaea laetipori NRRL Y 27713	GCA_003705675.1
Saccharomycetes	Nadsonia fulvescens var. fulvescens NRRL Y 12810 NRRL Y 12810	GCA_003705595.2
Saccharomycetes	Meyerozyma athensensis NRRL Y 27644	GCA_003705555.1
Saccharomycetes	Priceomyces medius NRRL Y 7122	GCA_003705335.1
Saccharomycetes	Komagataella populi NRRL YB 455	GCA_003705255.3
Saccharomycetes	Ambrosiozyma ambrosiae NRRL Y 7524	GCA_003705185.2
Saccharomycetes	Torulaspora franciscae NRRL Y 17532	GCA_003705175.3
Saccharomycetes	Spathaspora sp. JA1 JA1	GCA_003676035.1
Saccharomycetes	Meyerozyma sp. JA9 JA9	GCA_003676015.1
Saccharomycetes	Komagataella pseudopastoris NRRL Y 27603	GCA_003671595.3
Saccharomycetes	Zygotorulaspora florentina NRRL Y 1560	GCA_003671575.3
Saccharomycetes	Metschnikowia reukaufii MR1	GCA_003401635.1
Saccharomycetes	Metschnikowia reukaufii MR1	GCA_003401565.2
Saccharomycetes	Candida viswanathii ATCC 20962	GCA_003327735.1
Saccharomycetes	Pichia kluyveri CBA6002	GCA_003327685.1
Saccharomycetes	Saccharomyces kudriavzevii CR85	GCA_003327635.1
Saccharomycetes	Saccharomyces cerevisiae 11 3002	GCA_003274425.1
Saccharomycetes	Saccharomyces cerevisiae 155	GCA_003270565.1
Saccharomycetes	Candida sake CBA6005	GCA_003243815.1
Saccharomycetes	Nakazawaea wickerhamii NRRL Y 2563	GCA_003243035.1
Saccharomycetes	Pichia kudriavzevii CBS573	GCA_003054445.1
Saccharomycetes	Pichia kudriavzevii CBS5147	GCA_003054405.1
Saccharomycetes	Metschnikowia pulcherrima AP47	GCA_003017285.1
Saccharomycetes	Torulaspora delbrueckii COFT1	GCA_003013175.1
Saccharomycetes	Lachancea quebecensis CBS 14088	GCA_002900925.1
Saccharomycetes	Saccharomycopsis sp. UWOPS 91 127.1 UWOPS 91 127.1	GCA_002895615.1
Saccharomycetes	Metschnikowia sp. AWRI3582 AWRI3582	GCA_002894445.1
Saccharomycetes	Metschnikowia drosophilae UWOPS83 1135.3	GCA_002893735.1
Saccharomycetes	Metschnikowia torresii CBS 5152	GCA_002893725.1
Saccharomycetes	Metschnikowia orientalis UWOPS05 269.1	GCA_002893685.1
Saccharomycetes	Metschnikowia hawaiiana UWOPS91 698.3	GCA_002893645.1
Saccharomycetes	Saccharomycopsis fermentans CBS 7830	GCA_002564245.1
Saccharomycetes	Saccharomycopsis fodiens CBS 8332	GCA_002564235.1
Saccharomycetes	Saccharomyces sp. M14 M14	GCA_002375215.1
Saccharomycetes	Metschnikowia aberdeeniae SUB 05 213.1	GCA_002370615.1
Saccharomycetes	Metschnikowia kipukae UWOPS 00 669.2	GCA_002370135.1
Saccharomycetes	Wickerhamiella sorbophila DS02	GCA_002251995.2
Saccharomycetes	Millerozyma farinosa KCTC 27753	GCA_002196765.1
Saccharomycetes	Kluyveromyces lactis GG799	GCA_002151565.1
Saccharomycetes	Hanseniaspora vineae T0205AF	GCA_002141495.2
Saccharomycetes	Scheffersomyces shehatae NBRC 1983	GCA_002118155.1
Saccharomycetes	Scheffersomyces shehatae ATY839	GCA_002118035.1
Saccharomycetes	Yamadazyma laniorum yHMH7	GCA_002109505.1
Saccharomycetes	Saccharomyces paradoxus CBS432	GCA_002079055.1
Saccharomycetes	Metschnikowia australis UFMG CM Y6158	GCA_002073855.1
Saccharomycetes	Starmerella bacillaris FRI751	GCA_002024125.1
Saccharomycetes	Cyberlindnera fabianii 65	GCA_001983305.1
Saccharomycetes	Candida sp. JCM 15000 JCM 15000	GCA_001950555.1
Saccharomycetes	Sugiyamaella xylanicola nom. inval. UFMG CM Y1884	GCA_001939105.2
Saccharomycetes	Saccharomycopsis fibuligera ATCC 36309	GCA_001936275.1
Saccharomycetes	Brettanomyces anomalus CBS 7654	GCA_001754015.1
Saccharomycetes	Hanseniaspora opuntiae AWRI3578	GCA_001749795.1
Saccharomycetes	Hanseniaspora uvarum AWRI3580	GCA_001747055.1
Saccharomycetes	Hanseniaspora osmophila AWRI3579	GCA_001747045.1
Saccharomycetes	Brettanomyces custersianus CBS 4805	GCA_001746385.1
Saccharomycetes	Komagataella pastoris ATCC 28485	GCA_001708105.1
Saccharomycetes	Tortispora caseinolytica NRRL Y 17796 NRRL Y 17796	GCA_001661475.1
Saccharomycetes	Candida arabinofermentans NRRL YB 2248 NRRL YB 2248	GCA_001661425.1
Saccharomycetes	Suhomyces tanzawaensis NRRL Y 17324 NRRL Y 17324	GCA_001661415.1
Saccharomycetes	Ascoidea rubescens DSM 1968 DSM 1968	GCA_001661345.1
Saccharomycetes	Babjeviella inositovora NRRL Y 12698 NRRL Y 12698	GCA_001661335.1
Saccharomycetes	Lipomyces starkeyi NRRL Y 11557 NRRL Y 11557	GCA_001661325.1
Saccharomycetes	Nadsonia fulvescens var. elongata DSM 6958 DSM 6958	GCA_001661315.1
Saccharomycetes	Sugiyamaella lignohabitans CBS 10342	GCA_001640025.2
Saccharomycetes	Alloascoidea hylecoeti JCM 7604	GCA_001600815.1
Saccharomycetes	Ogataea methanolica JCM 10240	GCA_001600755.1
Saccharomycetes	Ascoidea asiatica JCM 7603	GCA_001600695.1
Saccharomycetes	Millerozyma acaciae JCM 10732	GCA_001600675.1
Saccharomycetes	Wickerhamiella versatilis JCM 5958	GCA_001600375.1
Saccharomycetes	Yarrowia deformans JCM 1694	GCA_001600075.1
Saccharomycetes	Ambrosiozyma monospora JCM 7599	GCA_001599995.1
Saccharomycetes	Priceomyces haplophilus JCM 1635	GCA_001599895.1
Saccharomycetes	Scheffersomyces lignosus JCM 9837	GCA_001599395.1
Saccharomycetes	Nakazawaea peltata JCM 9829	GCA_001599355.1
Saccharomycetes	Candida boidinii JCM 9604	GCA_001599335.1
Saccharomycetes	Starmerella bombicola JCM 9596	GCA_001599315.1
Saccharomycetes	Sporopachydermia quercuum JCM 9486	GCA_001599295.1
Saccharomycetes	Wickerhamiella domercqiae JCM 9478	GCA_001599275.1
Saccharomycetes	Candida succiphila JCM 9445	GCA_001599255.1
Saccharomycetes	Meyerozyma carpophila JCM 9396	GCA_001599235.1
Saccharomycetes	Saccharomycopsis malanga JCM 7620	GCA_001599215.1
Saccharomycetes	Wickerhamia fluorescens JCM 1821	GCA_001599155.1
Saccharomycetes	Candida sorboxylosa JCM 1536	GCA_001599115.1
Saccharomycetes	Hyphopichia homilentoma JCM 1507	GCA_001599095.1
Saccharomycetes	Ambrosiozyma kashinagicola JCM 15019	GCA_001599075.1
Saccharomycetes	Eremothecium sinecaudum ATCC 58844	GCA_001548555.1
Saccharomycetes	Geotrichum candidum CLIB 918	GCA_001402995.1
Saccharomycetes	Cyberlindnera jadinii CBS1600	GCA_001245095.1
Saccharomycetes	Yarrowia lipolytica 1031 YLIP	GCA_001069125.1
Saccharomycetes	Starmerella apicola NRRL Y 50540	GCA_001005415.1
Saccharomycetes	Eremothecium gossypii FDAG1 FDAG1	GCA_000968835.1
Saccharomycetes	Lachancea lanzarotensis CBS 12615	GCA_000938715.1
Saccharomycetes	Kluyveromyces dobzhanskii CBS 2104 CBS 2104	GCA_000820885.1
Saccharomycetes	Ogataea polymorpha BY4329	GCA_000787595.2
Saccharomycetes	Hanseniaspora uvarum 34 9	GCA_000775265.3
Saccharomycetes	Saccharomyces boulardii nom. inval. ATCC MYA 796	GCA_000769245.1
Saccharomycetes	Saccharomyces boulardii nom. inval. 17	GCA_000734875.3
Saccharomycetes	Eremothecium coryli CBS 5749 CBS 5749	GCA_000710315.1
Saccharomycetes	Candida tropicalis 121	GCA_000633855.1
Saccharomycetes	Saccharomyces pastorianus CBS 1513 CBS 1513	GCA_000586595.1
Saccharomycetes	Hanseniaspora vineae T0219AF	GCA_000585475.3
Saccharomycetes	Kuraishia capsulata CBS 1993 CBS 1993	GCA_000576695.1
Saccharomycetes	Zygosaccharomyces bailii ISA1307 ISA1307	GCA_000530735.1
Saccharomycetes	Spathaspora arborariae UFMG 19.1A UFMG 19.1A	GCA_000497715.1
Saccharomycetes	Zygosaccharomyces bailii CLIB 213 CLIB 213 CBS 680	GCA_000442885.1
Saccharomycetes	Saccharomyces sp. EDRL EDRL	GCA_000442675.2
Saccharomycetes	Clavispora lusitaniae MTCC 1001 MTCC 1001	GCA_000410855.1
Saccharomycetes	Metschnikowia pulcherrima 277 277	GCA_000317355.2
Saccharomycetes	Millerozyma farinosa CBS 7064 CBS 7064	GCA_000315895.1
Saccharomycetes	Candida orthopsilosis Co 90 125 Co 90 125	GCA_000315875.1
Saccharomycetes	Kazachstania africana CBS 2517 type strainCBS 2517	GCA_000304475.1
Saccharomycetes	Saccharomyces arboricola H 6 H 6	GCA_000292725.1
Saccharomycetes	Naumovozyma castellii type strainCBS 4309	GCA_000237345.1
Saccharomycetes	Tetrapisispora phaffii CBS 4417 type strainCBS 4417	GCA_000236905.1
Saccharomycetes	Eremothecium cymbalariae DBVPG#7215 DBVPG#7215	GCA_000235365.1
Saccharomycetes	Naumovozyma dairenensis CBS 421 type strainCBS 421	GCA_000227115.2
Saccharomycetes	Komagataella phaffii CBS 7435 CBS 7435	GCA_000223565.1
Saccharomycetes	Spathaspora passalidarum NRRL Y 27907 NRRL Y 27907	GCA_000223485.1
Saccharomycetes	Yamadazyma tenuis ATCC 10573 ATCC 10573	GCA_000223465.1
Saccharomycetes	Scheffersomyces stipitis CBS 6054 CBS 6054	GCA_000209165.1
Saccharomycetes	Ogataea parapolymorpha DL 1 DL 1	GCA_000187245.3
Saccharomycetes	Lodderomyces elongisporus NRRL YB 4239 NRRL YB 4239	GCA_000149685.1
Saccharomycetes	Lachancea kluyveri NRRL Y 12651 NRRL Y 12651	GCA_000149225.2
Saccharomycetes	Lachancea thermotolerans CBS 6340 CBS 6340	GCA_000142805.1
Saccharomycetes	Eremothecium gossypii ATCC 10895 ATCC 10895	GCA_000091025.4
Saccharomycetes	Candida dubliniensis CD36 CD36	GCA_000026945.1
Saccharomycetes	Debaryomyces hansenii CBS767 CBS767	GCA_000006445.2
Schizosaccharomycetes	Schizosaccharomyces japonicus CBS5679	GCA_958267425.1
Schizosaccharomycetes	Schizosaccharomyces pombe ATCC 98676	GCA_036558985.1
Schizosaccharomycetes	Schizosaccharomyces japonicus yFS275	GCA_032883015.1
Schizosaccharomycetes	Schizosaccharomyces versatilis CBS 103	GCA_032882995.1
Schizosaccharomycetes	Schizosaccharomyces pombe ATCC 16979	GCA_030707835.1
Schizosaccharomycetes	Schizosaccharomyces lindneri SZ1623 FG A	GCA_029532395.1
Schizosaccharomycetes	Schizosaccharomyces osmophilus CBS 15793	GCA_027921745.1
Schizosaccharomycetes	Schizosaccharomyces japonicus CBS 5679	GCA_019702855.1
Schizosaccharomycetes	Schizosaccharomyces octosporus yFS286 yFS286	GCA_000150505.2
Schizosaccharomycetes	Schizosaccharomyces cryophilus OY26 OY26	GCA_000004155.2
Schizosaccharomycetes	Schizosaccharomyces pombe 972h	GCA_000002945.3
Sordariomycetes	Cordyceps fumosorosea	GCA_963580265.1
Sordariomycetes	Cordyceps fumosorosea	GCA_963580225.1
Sordariomycetes	Trichoderma citrinoviride	GCA_943193675.1
Sordariomycetes	Xylaria hypoxylon CBS 122620	GCA_902806585.1
Sordariomycetes	Annulohypoxylon truncatum CBS 140778	GCA_902805465.1
Sordariomycetes	Fusarium proliferatum ET1 ET1	GCA_900067095.1
Sordariomycetes	Fusarium venenatum A35	GCA_900007375.1
Sordariomycetes	Fusarium sporotrichioides	GCA_041380485.1
Sordariomycetes	Trichoderma atroviride CGMCC 40488	GCA_041053265.1
Sordariomycetes	Akanthomyces muscarius	GCA_040955805.1
Sordariomycetes	Annulohypoxylon sp. FPYF3050.1 FPYF3050.1	GCA_040938065.1
Sordariomycetes	Fusarium tardichlamydosporum C081	GCA_040822215.1
Sordariomycetes	Fusarium purpurascens C058	GCA_040822135.1
Sordariomycetes	Colletotrichum acutatum COL14	GCA_040760105.1
Sordariomycetes	Sarocladium sparsum SA 3 64	GCA_040543125.1
Sordariomycetes	Sarocladium attenuatum SA 17035	GCA_040543115.1
Sordariomycetes	Neurospora intermedia FGSC 2613	GCA_040412205.1
Sordariomycetes	Annulohypoxylon stygium TJAS01	GCA_040126005.1
Sordariomycetes	Fusarium subglutinans FV62720	GCA_040114065.1
Sordariomycetes	Fusarium temperatum Ft25622	GCA_040114055.1
Sordariomycetes	Annulohypoxylon sp. FPYF3050 FPYF3050	GCA_040104375.1
Sordariomycetes	Colletotrichum fructicola 63	GCA_039271565.1
Sordariomycetes	Trichoderma reesei Br TrR03	GCA_038428105.1
Sordariomycetes	Ustilaginoidea albicans UA25	GCA_038381055.1
Sordariomycetes	Fusarium acuminatum	GCA_038181435.1
Sordariomycetes	Fusarium verticillioides 366	GCA_037954515.1
Sordariomycetes	Trichoderma afroharzianum Th6	GCA_037893235.1
Sordariomycetes	Fusarium sulawesiense KUNCC3432	GCA_037577435.1
Sordariomycetes	Fusarium compactum KUNCC3431	GCA_037577415.1
Sordariomycetes	Neurospora intermedia NCK1314	GCA_037102815.1
Sordariomycetes	Fusarium guttiforme LH A308	GCA_037044015.1
Sordariomycetes	Sarocladium oryzae LH A518	GCA_037043775.1
Sordariomycetes	Colletotrichum tabaci YC1	GCA_036851105.1
Sordariomycetes	Fusarium redolens QK1	GCA_035773055.1
Sordariomycetes	Fusarium kyushuense WFK101	GCA_034753255.1
Sordariomycetes	Fusarium oxysporum 19 385	GCA_034641985.1
Sordariomycetes	Colletotrichum lini 757	GCA_034638275.1
Sordariomycetes	Colletotrichum lini 390 1	GCA_034638235.1
Sordariomycetes	Colletotrichum destructivum CBS 520.97	GCA_034447905.1
Sordariomycetes	Neurospora hispaniola FGSC 10403	GCA_033458365.1
Sordariomycetes	Neurospora tetraspora CBS 560.94	GCA_033439725.1
Sordariomycetes	Trichocladium antarcticum CBS 123565	GCA_033297235.1
Sordariomycetes	Colletotrichum lupini CBS 109225	GCA_030913515.1
Sordariomycetes	Colletotrichum phormii CBS 102054	GCA_030913505.1
Sordariomycetes	Colletotrichum godetiae CBS 193.32	GCA_030913485.1
Sordariomycetes	Colletotrichum melonis	GCA_030868995.1
Sordariomycetes	Colletotrichum paranaense IMI 384185	GCA_030867605.1
Sordariomycetes	Colletotrichum costaricense IMI 309622	GCA_030867565.1
Sordariomycetes	Beauveria bassiana ARSEF 6444	GCA_030849485.1
Sordariomycetes	Colletotrichum brevisporum C1	GCA_030770045.1
Sordariomycetes	Sarocladium kiliense ZJ 1	GCA_030734395.1
Sordariomycetes	Colletotrichum graminicola T1 3 3	GCA_030463195.1
Sordariomycetes	Sarocladium strictum F4 1	GCA_030435815.1
Sordariomycetes	Ambrosiella beaveri CBS 121753	GCA_030294605.1
Sordariomycetes	Fusarium solani CR12	GCA_030014125.1
Sordariomycetes	Sarocladium terricola RCEF6201	GCA_029379155.1
Sordariomycetes	Colletotrichum graminicola	GCA_029226625.1
Sordariomycetes	Colletotrichum nymphaeae JS 0361	GCA_029169025.1
Sordariomycetes	Cordyceps cateniannulata FRD 24	GCA_028828415.1
Sordariomycetes	Trichoderma breve T069	GCA_028502605.1
Sordariomycetes	Akanthomyces muscarius Ve6	GCA_028009165.1
Sordariomycetes	Fusarium irregulare CF00137	GCA_027945235.1
Sordariomycetes	Colletotrichum fioriniae IMI 355084	GCA_027942845.1
Sordariomycetes	Berkeleyomyces rouxiae	GCA_027563905.1
Sordariomycetes	Colletotrichum asianum YN55	GCA_027406345.1
Sordariomycetes	Colletotrichum asianum FJ11	GCA_027406305.1
Sordariomycetes	Colletotrichum tropicale HN32	GCA_027406125.1
Sordariomycetes	Colletotrichum endophyticum YN32	GCA_027406105.1
Sordariomycetes	Colletotrichum gigasporum HN42	GCA_027406085.1
Sordariomycetes	Colletotrichum cordylinicola HN23	GCA_027406065.1
Sordariomycetes	Colletotrichum liaoningense YN33	GCA_027406045.1
Sordariomycetes	Colletotrichum musae GZ23	GCA_027406025.1
Sordariomycetes	Colletotrichum horii PLG3	GCA_027406005.1
Sordariomycetes	Fusarium falciforme Fu3.1	GCA_026873545.1
Sordariomycetes	Fusarium odoratissimum FocTR4 03242	GCA_026745415.1
Sordariomycetes	Colletotrichum camelliae LT 3 1	GCA_026740055.1
Sordariomycetes	Trichoderma erinaceum BJ212 21	GCA_026401215.1
Sordariomycetes	Trichoderma asperellum CGMCC 11653	GCA_026401105.1
Sordariomycetes	Colletotrichum fioriniae ACFK5	GCA_026319145.1
Sordariomycetes	Trichoderma longibrachiatum FL 4	GCA_026259275.1
Sordariomycetes	Colletotrichum cliviicola YN31	GCA_026119605.1
Sordariomycetes	Trichoderma arundinaceum TP15.11	GCA_025919665.1
Sordariomycetes	Fusarium zanthoxyli FZ001	GCA_025919635.1
Sordariomycetes	Fusarium keratoplasticum	GCA_025433555.1
Sordariomycetes	Fusarium asiaticum KCTC 16664	GCA_025258505.1
Sordariomycetes	Colletotrichum gigasporum JS 0367	GCA_024584535.1
Sordariomycetes	Beauveria sp. NWAFU 1 NWAFU 1	GCA_024472245.1
Sordariomycetes	Ustilaginoidea virens iJS62	GCA_024397435.1
Sordariomycetes	Tolypocladium album IQ158	GCA_024341135.1
Sordariomycetes	Tolypocladium endophyticum MX560	GCA_024339985.1
Sordariomycetes	Epichloe amarillans NFE708	GCA_024072835.1
Sordariomycetes	Colletotrichum higginsianum MAFF 245053	GCA_023705605.1
Sordariomycetes	Epichloe typhina Pt1807 3 ecotype lab culture	GCA_023658615.1
Sordariomycetes	Epichloe glyceriae E2772	GCA_023658535.1
Sordariomycetes	Epichloe gansuensis e7080	GCA_023658505.1
Sordariomycetes	Epichloe elymi Nfe728	GCA_023658475.1
Sordariomycetes	Epichloe bromicola Nfe1	GCA_023658445.1
Sordariomycetes	Epichloe brachyelytri E1124	GCA_023650705.1
Sordariomycetes	Epichloe baconii E357	GCA_023650635.1
Sordariomycetes	Colletotrichum lupini IMI 504893	GCA_023278565.1
Sordariomycetes	Xylariaceae sp. AK1471 AK1471	GCA_023159215.1
Sordariomycetes	Fusarium commune F23a	GCA_023065405.1
Sordariomycetes	Beauveria pseudobassiana RGM 2184	GCA_022985055.1
Sordariomycetes	Trichoderma koningiopsis RA3a	GCA_022985005.1
Sordariomycetes	Xylaria nigripes YMJ 653	GCA_022984845.1
Sordariomycetes	Colletotrichum tofieldiae 0861	GCA_022836595.1
Sordariomycetes	Colletotrichum spaethianum MAFF 239500	GCA_022836535.1
Sordariomycetes	Fusarium marasasianum CMW 25512	GCA_022833035.1
Sordariomycetes	Epichloe sibirici T71	GCA_022702365.1
Sordariomycetes	Calonectria montana	GCA_022606435.1
Sordariomycetes	Xylariaceae sp. FL0016 FL0016	GCA_022578815.1
Sordariomycetes	Annulohypoxylon truncatum CBS 140777	GCA_022578515.1
Sordariomycetes	Xylaria cf. heliscus FL0509	GCA_022539335.1
Sordariomycetes	Annulohypoxylon nitens CBS 120705	GCA_022496965.1
Sordariomycetes	Annulohypoxylon maeteangense CBS 123835	GCA_022496945.1
Sordariomycetes	Colletotrichum aenigma JS 0419	GCA_022496045.1
Sordariomycetes	Arthrinium puccinioides CBS 549.89	GCA_022414665.1
Sordariomycetes	Xylaria arbuscula CBS 124340	GCA_022385695.1
Sordariomycetes	Colletotrichum liriopes MAFF 242679	GCA_022179045.1
Sordariomycetes	Tolypocladium guangdongense GD1 15	GCA_022114105.1
Sordariomycetes	Epichloe scottii TT 2021a	GCA_021950295.1
Sordariomycetes	Colletotrichum gloeosporioides CgDa01	GCA_021650765.1
Sordariomycetes	Fusarium circinatum CMWF2633	GCA_021436885.1
Sordariomycetes	Colletotrichum gloeosporioides 23 23	GCA_021432615.1
Sordariomycetes	Sarocladium implicatum TR	GCA_021176775.1
Sordariomycetes	Calonectria ilicicola HNYC58	GCA_021019105.1
Sordariomycetes	Calonectria hawksworthii S6964	GCA_020975415.1
Sordariomycetes	Fusarium virguliforme Lake	GCA_020883605.1
Sordariomycetes	Calonectria ilicicola GDYJ169	GCA_020809705.1
Sordariomycetes	Fusarium tricinctum MPI SDFR AT 0068	GCA_020744515.1
Sordariomycetes	Fusarium flagelliforme FIESC 12 MPI CAGE AA 0113	GCA_020744385.1
Sordariomycetes	Ilyonectria sp. MPI CAGE AT 0026 MPI CAGE AT 0026	GCA_020744155.1
Sordariomycetes	Ilyonectria destructans MPI CAGE AT 0134	GCA_020740775.1
Sordariomycetes	Trichoderma virens FT 333 FT 333	GCA_020647705.1
Sordariomycetes	Colletotrichum sublineola CsGL1	GCA_020631755.1
Sordariomycetes	Trichoderma cornu damae KA19 0412C	GCA_020631695.1
Sordariomycetes	Fusarium pilosicola CMWF1183	GCA_020615335.1
Sordariomycetes	Trichoderma atroviride CG 6828	GCA_020466355.1
Sordariomycetes	Colletotrichum viniferum CvYL2a	GCA_020226115.1
Sordariomycetes	Trichoderma semiorbis FJ059	GCA_020045945.2
Sordariomycetes	Trichoderma gracile HK011 1	GCA_020002365.1
Sordariomycetes	Fusarium musae F31	GCA_019915245.1
Sordariomycetes	Colletotrichum horii FJ 1	GCA_019693695.1
Sordariomycetes	Trichoderma simmonsii GH Sj1	GCA_019565615.1
Sordariomycetes	Trichoderma harzianum CGMCC 20739	GCA_019097725.1
Sordariomycetes	Fusarium avenaceum 542020KK	GCA_019055345.1
Sordariomycetes	Fusarium equiseti 522020KK	GCA_019055195.1
Sordariomycetes	Epichloe hybrida	GCA_019022495.1
Sordariomycetes	Colletotrichum scovillei Coll 153	GCA_018906765.1
Sordariomycetes	Colletotrichum camelliae LS 19	GCA_018853505.1
Sordariomycetes	Fusarium acaciae mearnsii CBS 110253	GCA_017657135.1
Sordariomycetes	Fusarium aethiopicum CBS 122858	GCA_017657045.1
Sordariomycetes	Fusarium austroamericanum CBS 110246	GCA_017657035.1
Sordariomycetes	Fusarium boothii CBS 316.73	GCA_017656985.1
Sordariomycetes	Fusarium brasilicum CBS 119179	GCA_017656955.1
Sordariomycetes	Fusarium cortaderiae CBS 119183	GCA_017656915.1
Sordariomycetes	Fusarium louisianense CBS 127524	GCA_017656825.1
Sordariomycetes	Fusarium meridionale CBS 110249	GCA_017656785.1
Sordariomycetes	Fusarium mesoamericanum CBS 415.86	GCA_017656745.1
Sordariomycetes	Fusarium nepalense CBS 127669	GCA_017656735.1
Sordariomycetes	Fusarium vorosii CBS 119177	GCA_017656615.1
Sordariomycetes	Trichoderma brevicrassum TC967	GCA_017311225.1
Sordariomycetes	Fusarium sacchari FS66	GCA_017165645.1
Sordariomycetes	Arthrinium koreanum KUC21332	GCA_017163955.1
Sordariomycetes	Calonectria pauciramosa CBS 138824	GCA_017140785.1
Sordariomycetes	Calonectria hongkongensis CMW 47271	GCA_017140755.1
Sordariomycetes	Calonectria pauciramosa CMW 7592	GCA_017140655.1
Sordariomycetes	Trichocladium uniseriatum OTU1415	GCA_017139535.1
Sordariomycetes	Fusarium culmorum Class2 1B	GCA_016952355.1
Sordariomycetes	Epichloe festucae Rose City	GCA_016859245.1
Sordariomycetes	Colletotrichum eleusines NJC 16	GCA_016807845.1
Sordariomycetes	Colletotrichum echinochloae B 48	GCA_016618095.1
Sordariomycetes	Colletotrichum australisinense nom. inval. GX1655	GCA_014706365.1
Sordariomycetes	Colletotrichum truncatum CMES1059	GCA_014235925.2
Sordariomycetes	Calonectria fujianensis CMW 27257	GCA_013406965.1
Sordariomycetes	Calonectria honghensis CMW 47669	GCA_013403855.1
Sordariomycetes	Calonectria pseudoturangicola CMW 47496	GCA_013403825.1
Sordariomycetes	Colletotrichum aenigma Cg56	GCA_013390185.1
Sordariomycetes	Colletotrichum siamense CAD4	GCA_013201795.1
Sordariomycetes	Ophiocordyceps camponoti floridani EC05	GCA_012980515.1
Sordariomycetes	Ophiocordyceps sinensis IOZ07	GCA_012934285.1
Sordariomycetes	Colletotrichum karsti CkLH20	GCA_011947395.2
Sordariomycetes	Colletotrichum truncatum KLC.C 4	GCA_011947275.1
Sordariomycetes	Trichoderma lentiforme CFAM 422	GCA_011066345.1
Sordariomycetes	Colletotrichum destructivum YC1	GCA_009900065.1
Sordariomycetes	Neurospora tetraspora FGSC 26668	GCA_009806155.1
Sordariomycetes	Neurospora cerealis FGSC 26648	GCA_009806135.1
Sordariomycetes	Neurospora discreta FGSC 8579 FGSC 8579 matA	GCA_009805215.1
Sordariomycetes	Fusarium fujikuroi Augusto2	GCA_009663095.1
Sordariomycetes	Sarocladium brachiariae HND5	GCA_008271525.1
Sordariomycetes	Cordyceps militaris ATCC 34164	GCA_008080495.1
Sordariomycetes	Trichoderma viride Tv 1511	GCA_007896495.1
Sordariomycetes	Xylaria flabelliformis G536	GCA_007182795.1
Sordariomycetes	Cordyceps javanica IJ1G	GCA_006981985.1
Sordariomycetes	Arthrinium phaeospermum M.B.Ellis	GCA_006503535.1
Sordariomycetes	Xylaria sp. BCC 1067 BCC 1067	GCA_005188305.1
Sordariomycetes	Amesia nigricolor F5	GCA_004802645.1
Sordariomycetes	Calonectria pseudonaviculata CBS 139395	GCA_004380915.1
Sordariomycetes	Xylaria grammica EL000614	GCA_004353285.2
Sordariomycetes	Amphirosellinia nigrospora JS 1675	GCA_004123355.1
Sordariomycetes	Tolypocladium inflatum CBS 567.84	GCA_003945565.1
Sordariomycetes	Epichloe festucae Fl1 Fl1	GCA_003814445.1
Sordariomycetes	Berkeleyomyces basicola CMW49352	GCA_003671435.1
Sordariomycetes	Aquanectria penicillioides NNIBRFG19	GCA_003415625.1
Sordariomycetes	Colletotrichum lentis	GCA_003386485.1
Sordariomycetes	Fusarium fracticaudum CBS 137234	GCA_003353625.1
Sordariomycetes	Cordyceps militaris 01	GCA_003332165.1
Sordariomycetes	Annulohypoxylon stygium MG137	GCA_003314315.1
Sordariomycetes	Colletotrichum sp. JS 367 JS 367	GCA_003122705.1
Sordariomycetes	Escovopsis sp. Ae724 Ae724	GCA_003055165.1
Sordariomycetes	Escovopsis weberi EWB	GCA_003055145.1
Sordariomycetes	Ilyonectria mors panacis g3b	GCA_002991585.1
Sordariomycetes	Ambrosiella xylebori CBS 110.61	GCA_002778035.1
Sordariomycetes	Colletotrichum fructicola 1104 7	GCA_002314275.2
Sordariomycetes	Trichoderma guizhouense NJAU 4742	GCA_002022785.1
Sordariomycetes	Sarocladium oryzae JCM 12450	GCA_001972265.1
Sordariomycetes	Trichoderma koningii JCM 1883	GCA_001950475.1
Sordariomycetes	Beauveria bassiana ARSEF 8028	GCA_001682635.1
Sordariomycetes	Fusarium poae 2516	GCA_001675295.1
Sordariomycetes	Colletotrichum higginsianum IMI 349063 IMI 349063	GCA_001672515.1
Sordariomycetes	Akanthomyces lecanii RCEF 1005 RCEF 1005	GCA_001636795.1
Sordariomycetes	Ophiocordyceps polyrhachis furcata BCC 54312 BCC 54312	GCA_001633055.2
Sordariomycetes	Fusarium metavorans FSSC 6	GCA_001633045.1
Sordariomycetes	Albophoma yamanashiensis JCM 11844	GCA_001600555.1
Sordariomycetes	Basipetospora chlamydospora JCM 23157	GCA_001599675.1
Sordariomycetes	Colletotrichum acutatum 1	GCA_001593745.1
Sordariomycetes	Trichoderma gamsii T6085	GCA_001481775.2
Sordariomycetes	Samsoniella hepiali FENG	GCA_001455915.2
Sordariomycetes	Tolypocladium ophioglossoides CBS 100239 CBS 100239	GCA_001189435.1
Sordariomycetes	Fusarium pseudograminearum CS3270	GCA_000974265.2
Sordariomycetes	Ustilaginoidea virens IPU010	GCA_000965225.2
Sordariomycetes	Tolypocladium sp. Salcha MEA 2 Salcha MEA 2	GCA_000750145.2
Sordariomycetes	Neurospora tetrasperma FGSC 2508 FGSC 2508	GCA_000213175.1
Sordariomycetes	Neurospora crassa OR74A OR74A	GCA_000182925.2
Tremellomycetes	Bullera alba	GCA_947297625.1
Tremellomycetes	Saitozyma podzolica	GCA_902501175.1
Tremellomycetes	Saitozyma podzolica	GCA_902501145.1
Tremellomycetes	Vanrija albida AlHP1	GCA_041260175.1
Tremellomycetes	Trichosporon inkin JCM 9195	GCA_040365635.1
Tremellomycetes	Phaeotremella pseudofoliacea JCM 11330	GCA_040362585.1
Tremellomycetes	Filobasidium uniguttulatum JCM 3685	GCA_039545395.1
Tremellomycetes	Trichosporon faecale JCM 2941	GCA_039545375.1
Tremellomycetes	Trichosporon coremiiforme JCM 2938	GCA_039545355.1
Tremellomycetes	Mrakia aquatica JCM 1775	GCA_039545235.1
Tremellomycetes	Kwoniella newhampshirensis CBS 13917	GCA_039105145.1
Tremellomycetes	Naganishia diffluens bongo	GCA_037832395.1
Tremellomycetes	Vanrija sp. CR7 CR7	GCA_037575445.1
Tremellomycetes	Trichosporon asahii LH A611	GCA_037044125.1
Tremellomycetes	Cutaneotrichosporon curvatum PG5214	GCA_037041535.1
Tremellomycetes	Cutaneotrichosporon sp. M94 02A M94 02A	GCA_037040355.1
Tremellomycetes	Kwoniella europaea PYCC6329 PYCC6329	GCA_036810445.1
Tremellomycetes	Kwoniella dendrophila CBS 6074 CBS 6074	GCA_036810415.1
Tremellomycetes	Kwoniella sp. B9012 B9013	GCA_036810365.1
Tremellomycetes	Kwoniella sp. CBS 9459 CBS 9459	GCA_036428585.1
Tremellomycetes	Cryptococcus sp. DSM 104549 DSM 104549	GCA_036427605.1
Tremellomycetes	Cryptococcus sp. DSM 104548 DSM 104548	GCA_036426225.1
Tremellomycetes	Kwoniella botswanensis CBS 12716	GCA_036426115.1
Tremellomycetes	Cryptococcus decagattii 7685027	GCA_036417295.1
Tremellomycetes	Kwoniella sp. CBS 6097 CBS 6097	GCA_036287355.1
Tremellomycetes	Papiliotrema fonsecae NYNU 19160	GCA_035773095.1
Tremellomycetes	Kwoniella shivajii	GCA_035658355.1
Tremellomycetes	Tremella fuciformis cultivar Tr01	GCA_032768795.1
Tremellomycetes	Tremella fuciformis cultivar Tr01	GCA_032767855.1
Tremellomycetes	Tremella fuciformis Tr01	GCA_032464415.1
Tremellomycetes	Papiliotrema nemorosus TBRC 2959	GCA_032158125.1
Tremellomycetes	Papiliotrema laurentii 5307AH	GCA_031326905.1
Tremellomycetes	Cutaneotrichosporon cavernicola HIS631	GCA_030864415.1
Tremellomycetes	Cutaneotrichosporon sp. HIS471 HIS471	GCA_030864385.1
Tremellomycetes	Cutaneotrichosporon cavernicola HIS019	GCA_030864355.1
Tremellomycetes	Cutaneotrichosporon cavernicola HIS002	GCA_030864325.1
Tremellomycetes	Cutaneotrichosporon spelunceum HIS016	GCA_030805415.1
Tremellomycetes	Trichosporon sp. DN520 DN520	GCA_030347605.1
Tremellomycetes	Naganishia cerealis MNA CCFEE 5261	GCA_030039265.1
Tremellomycetes	Naganishia friedmannii MNA CCFEE 5423	GCA_030039255.1
Tremellomycetes	Naganishia vaughanmartiniae MNA CCFEE 5425	GCA_030039245.1
Tremellomycetes	Naganishia onofrii DBVPG 5303	GCA_030039215.1
Tremellomycetes	Vanrija sp. TS 01 TS 01	GCA_026725045.1
Tremellomycetes	Cryptococcus sp. GC Crypt 2 GC Crypt 2	GCA_026538405.1
Tremellomycetes	Dioszegia hungarica PDD 24b 2	GCA_025882075.1
Tremellomycetes	Trichosporon asahii F6008	GCA_025529955.1
Tremellomycetes	Trichosporon sp. PG3703 PG3703	GCA_025529325.1
Tremellomycetes	Mrakia gelida MGH 2	GCA_024345305.1
Tremellomycetes	Tremella yokohamensis NBRC 100148	GCA_024343385.1
Tremellomycetes	Dioszegia hungarica Y1	GCA_024115145.1
Tremellomycetes	Apiotrichum siamense L8in5	GCA_023653615.1
Tremellomycetes	Cryptococcus neoformans Bt133	GCA_023650595.1
Tremellomycetes	Cryptococcus neoformans Bt65	GCA_023650535.1
Tremellomycetes	Trichosporon sp. PB005A PB005A	GCA_023630055.1
Tremellomycetes	Trichosporonaceae sp. PDH3307A PDH3307A	GCA_023629995.1
Tremellomycetes	Trichosporonaceae sp. PL3408A PL3408A	GCA_023629975.1
Tremellomycetes	Cutaneotrichosporon cutaneum P1411	GCA_023628135.1
Tremellomycetes	Apiotrichum brassicae M2204	GCA_023628095.1
Tremellomycetes	Cutaneotrichosporon dermatis M4303A	GCA_023628035.1
Tremellomycetes	Pascua sp. PH3615 PH3615	GCA_023628015.1
Tremellomycetes	Cutaneotrichosporon sp. PA3318 PA3318	GCA_023627975.1
Tremellomycetes	Pascua sp. PH3313A PH3313A	GCA_023627955.1
Tremellomycetes	Pascua sp. PK3308B 1 PK3308B 1	GCA_023627935.1
Tremellomycetes	Trichosporon ovoides 2NF903A	GCA_023627895.1
Tremellomycetes	Trichosporon ovoides 2NF903B	GCA_023627855.1
Tremellomycetes	Tremellales sp. FJII L8 SW PAB2 FJII L8 SW PAB2	GCA_022813505.1
Tremellomycetes	Naematelia aurantialba NX 20	GCA_021527695.1
Tremellomycetes	Filobasidium floriforme CBS 6241	GCA_021052385.1
Tremellomycetes	Cryptococcus neoformans A5 35 17	GCA_020975495.1
Tremellomycetes	Vanrija pseudolonga	GCA_020906515.1
Tremellomycetes	Cutaneotrichosporon curvatum ATCC 10567	GCA_020080345.1
Tremellomycetes	Cutaneotrichosporon dermatis NICC30027	GCA_020011015.1
Tremellomycetes	Naganishia liquefaciens I2 R1	GCA_019775365.1
Tremellomycetes	Naganishia vishniacii ANT03 052 ANT03 052	GCA_015708705.1
Tremellomycetes	Naganishia liquefaciens N6	GCA_013423385.1
Tremellomycetes	Apiotrichum mycotoxinovorans CICC 1454	GCA_013177335.1
Tremellomycetes	Naganishia adeliensis IF1SW F1	GCA_012922715.1
Tremellomycetes	Naganishia sp. IF7SW B1 IF7SW B1	GCA_012922685.1
Tremellomycetes	Naganishia albida IIF5SW F1	GCA_012922635.1
Tremellomycetes	Papiliotrema laurentii IF7SW B5	GCA_012922625.1
Tremellomycetes	Papiliotrema laurentii IF7SW F4	GCA_012922615.1
Tremellomycetes	Naganishia albida IF6SW B1	GCA_012922605.1
Tremellomycetes	Apiotrichum mycotoxinovorans GMU1709	GCA_011290525.1
Tremellomycetes	Trichosporon ovoides 2NF903A	GCA_009833065.1
Tremellomycetes	Cryptococcus gattii VGV MF34	GCA_009650685.1
Tremellomycetes	Kwoniella shandongensis CBS 12478	GCA_008629635.2
Tremellomycetes	Cutaneotrichosporon oleaginosum ATCC 20508	GCA_008065305.1
Tremellomycetes	Vanrija humicola CBS 4282	GCA_008065275.1
Tremellomycetes	Cryptococcus floricola DSM 27421	GCA_006352305.1
Tremellomycetes	Cryptococcus wingfieldii CBS7118	GCA_006149155.1
Tremellomycetes	Saitozyma podzolica DSM 27192	GCA_003942215.1
Tremellomycetes	Apiotrichum porosum DSM 27194	GCA_003942205.1
Tremellomycetes	Cutaneotrichosporon mucoides JCM 9939	GCA_003116955.1
Tremellomycetes	Takashimella tepidaria nom. inval. JCM 11965	GCA_003116915.1
Tremellomycetes	Cutaneotrichosporon dermatis JCM 11170	GCA_003116895.1
Tremellomycetes	Takashimella koratensis JCM 12878	GCA_003116875.1
Tremellomycetes	Vanrija humicola UJ1	GCA_002897395.1
Tremellomycetes	Cutaneotrichosporon cyanovorans JCM 31833	GCA_002335625.1
Tremellomycetes	Prillingera fragicola JCM 1530	GCA_002335605.1
Tremellomycetes	Cutaneotrichosporon daszewskae JCM 11166	GCA_002335585.1
Tremellomycetes	Cutaneotrichosporon arboriforme JCM 14201	GCA_002335565.1
Tremellomycetes	Naematelia encephala 68 887.2	GCA_002105065.1
Tremellomycetes	Trichosporon asahii JCM 2466	GCA_001972365.1
Tremellomycetes	Trichosporon inkin JCM 9195	GCA_001752625.1
Tremellomycetes	Trichosporon coremiiforme JCM 2938	GCA_001752605.1
Tremellomycetes	Trichosporon faecale JCM 2941	GCA_001752585.1
Tremellomycetes	Cryptococcus depauperatus CBS 7855	GCA_001720245.2
Tremellomycetes	Cryptococcus amylolentus CBS 6273 CBS 6273	GCA_001720235.1
Tremellomycetes	Cryptococcus amylolentus CBS 6039 CBS 6039	GCA_001720205.1
Tremellomycetes	Cryptococcus depauperatus CBS 7841 CBS 7841	GCA_001720195.2
Tremellomycetes	Cryptococcus wingfieldii CBS 7118 CBS 7118	GCA_001720155.1
Tremellomycetes	Solicoccozyma terricola JCM 24523	GCA_001712455.1
Tremellomycetes	Cutaneotrichosporon oleaginosum ATCC 20509	GCA_001712445.1
Tremellomycetes	Cutaneotrichosporon cutaneum ACCC 20271	GCA_001613755.1
Tremellomycetes	Solicoccozyma terricola JCM 24518	GCA_001600875.1
Tremellomycetes	Saitozyma sp. JCM 24511 JCM 24511	GCA_001600855.1
Tremellomycetes	Apiotrichum laibachii JCM 2947	GCA_001600735.1
Tremellomycetes	Cutaneotrichosporon cutaneum JCM 1462	GCA_001600715.1
Tremellomycetes	Dioszegia aurantiaca JCM 2956	GCA_001600655.1
Tremellomycetes	Dioszegia crocea JCM 2961	GCA_001600615.1
Tremellomycetes	Apiotrichum veenhuisii JCM 10691	GCA_001600595.1
Tremellomycetes	Pascua guehoae JCM 10690	GCA_001600415.1
Tremellomycetes	Mrakia frigida JCM 7857	GCA_001600395.1
Tremellomycetes	Apiotrichum gracile JCM 10018	GCA_001600335.1
Tremellomycetes	Apiotrichum gamsii JCM 9941	GCA_001600315.1
Tremellomycetes	Apiotrichum brassicae JCM 1599	GCA_001600295.1
Tremellomycetes	Cutaneotrichosporon curvatum JCM 1532	GCA_001600275.1
Tremellomycetes	Apiotrichum porosum JCM 1458	GCA_001600255.1
Tremellomycetes	Vanrija humicola JCM 1457	GCA_001600235.1
Tremellomycetes	Bullera alba JCM 2954	GCA_001600095.1
Tremellomycetes	Filobasidium wieringae JCM 11695	GCA_001600055.1
Tremellomycetes	Holtermanniella nyarrowii JCM 11471	GCA_001600035.1
Tremellomycetes	Solicoccozyma phenolica JCM 11743	GCA_001600015.1
Tremellomycetes	Holtermannia corniformis JCM 1743	GCA_001599935.1
Tremellomycetes	Naganishia albida JCM 2334	GCA_001599735.1
Tremellomycetes	Phaeotremella fagi JCM 13614	GCA_001599715.1
Tremellomycetes	Phaeotremella skinneri JCM 9039	GCA_001599695.1
Tremellomycetes	Apiotrichum domesticum JCM 9580	GCA_001599015.1
Tremellomycetes	Apiotrichum montevideense JCM 9937	GCA_001598995.1
Tremellomycetes	Cutaneotrichosporon oleaginosum IBC0246	GCA_001027345.1
Tremellomycetes	Mrakia blollopis SK 4	GCA_000950635.1
Tremellomycetes	Cryptococcus gattii E566 E566	GCA_000875815.1
Tremellomycetes	Cryptococcus deuterogattii CA1014 CA1014	GCA_000875795.1
Tremellomycetes	Cryptococcus bacillisporus CA1873 CA1873	GCA_000855695.1
Tremellomycetes	Cryptococcus deuterogattii 99473 99473	GCA_000836455.1
Tremellomycetes	Cryptococcus gattii Ru294 Ru294	GCA_000836355.1
Tremellomycetes	Cryptococcus bacillisporus CA1280 CA1280	GCA_000836335.2
Tremellomycetes	Cryptococcus deuterogattii 2001935 1 2001935 1	GCA_000835815.1
Tremellomycetes	Cryptococcus tetragattii IND107 IND107	GCA_000835755.2
Tremellomycetes	Kwoniella pini CBS 10737 CBS 10737	GCA_000512605.3
Tremellomycetes	Kwoniella bestiolae CBS 10118 CBS 10118	GCA_000512585.3
Tremellomycetes	Kwoniella dejecticola CBS 10117 CBS 10117	GCA_000512565.3
Tremellomycetes	Kwoniella mangroviensis CBS 10435 CBS 10435	GCA_000507885.2
Tremellomycetes	Kwoniella mangroviensis CBS 8886 CBS 8886	GCA_000507485.3
Tremellomycetes	Kwoniella mangroviensis CBS 8507 CBS 8507	GCA_000507465.4
Tremellomycetes	Kwoniella heveanensis BCC8398 BCC8398	GCA_000507405.3
Tremellomycetes	Tremella mesenterica DSM 1558 Fries	GCA_000271645.1
Ustilaginomycetes	Ustilago lituana BRIP 46795 a	GCA_928869825.1
Ustilaginomycetes	Ustilago cynodontis NBRC 9727	GCA_928865425.1
Ustilaginomycetes	Anthracocystis walkeri RK 031	GCA_928858565.1
Ustilaginomycetes	Ustilago xerochloae BRIP 60876 a	GCA_928856705.1
Ustilaginomycetes	Ustilago maydis 198	GCA_928743665.1
Ustilaginomycetes	Ustanciosporium gigantosporum UMa706	GCA_928724875.1
Ustilaginomycetes	Ustanciosporium gigantosporum UMa706	GCA_928724795.1
Ustilaginomycetes	Ustilago trichophora NBRC 100157	GCA_928724775.1
Ustilaginomycetes	Sporisorium exsertum RK 033	GCA_928724755.1
Ustilaginomycetes	Anthracocystis setariae BRIP 26904 a	GCA_928724745.1
Ustilaginomycetes	Ustilago curta BRIP 26929 a	GCA_928722295.1
Ustilaginomycetes	Ustilago maydis 482	GCA_928722285.1
Ustilaginomycetes	Ustilago vetiveriae RK 075	GCA_928722275.1
Ustilaginomycetes	Ustilago maydis 482	GCA_928722265.1
Ustilaginomycetes	Ustilago trichophora NBRC100155	GCA_900323505.1
Ustilaginomycetes	Pseudozyma flocculosa DAOM196992	GCA_900322975.1
Ustilaginomycetes	Moesziomyces antarcticus ATCC 34888	GCA_900322835.1
Ustilaginomycetes	Thecaphora thlaspeos LF1	GCA_900291925.1
Ustilaginomycetes	Ustilago sp. UG 2017a Udi2	GCA_900242705.1
Ustilaginomycetes	Ustilago sp. UG 2017b Uhc1	GCA_900242695.1
Ustilaginomycetes	Melanopsichium pennsylvanicum Mp4	GCA_900208305.1
Ustilaginomycetes	Sporisorium reilianum f. sp. reilianum SRS1 H2 8	GCA_900162835.1
Ustilaginomycetes	Ustilago bromivora UB2112	GCA_900080155.1
Ustilaginomycetes	Sporisorium scitamineum SscI8	GCA_900002365.1
Ustilaginomycetes	Farysia acheniorum JCM 8976	GCA_040365765.1
Ustilaginomycetes	Ustilago crameri SCZ 6	GCA_033846815.1
Ustilaginomycetes	Moesziomyces antarcticus KMA5	GCA_031214725.1
Ustilaginomycetes	Moesziomyces globuligerus NYNU 178249	GCA_030849465.1
Ustilaginomycetes	Pseudozyma hubeiensis BOT O	GCA_030142165.1
Ustilaginomycetes	Fereydounia khargensis PL1	GCA_026413255.1
Ustilaginomycetes	Ustilago crameri Uc7	GCA_024271935.1
Ustilaginomycetes	Ustilago hordei Uh359	GCA_023748825.1
Ustilaginomycetes	Ustilago hordei Uh1273	GCA_023748735.1
Ustilaginomycetes	Ustilago hordei Uh1278	GCA_023748715.1
Ustilaginomycetes	Sporisorium graminicola P1410A	GCA_023629955.1
Ustilaginomycetes	Pseudozyma pruni CBS 10937	GCA_023212685.1
Ustilaginomycetes	Farysia itapuensis CBS 10428	GCA_023212645.1
Ustilaginomycetes	Pseudozyma flocculosa CBS 167.88.2	GCA_023212635.2
Ustilaginomycetes	Moesziomyces parantarcticus CBS 10005	GCA_023212605.1
Ustilaginomycetes	Ustilago loliicola Us 530	GCA_022963135.1
Ustilaginomycetes	Ustilago nuda DE 29490	GCA_022963125.1
Ustilaginomycetes	Ustilago tritici Ut 3	GCA_022963115.1
Ustilaginomycetes	Ustilago esculenta YD3	GCA_020827535.1
Ustilaginomycetes	Ustilago shanxiensis CBS 10075	GCA_019972555.1
Ustilaginomycetes	Anthracocystis panici leucophaei SPL10	GCA_014826065.1
Ustilaginomycetes	Sporisorium graminicola CBS 10092	GCA_005498985.1
Ustilaginomycetes	Testicularia cyperi MCA 3645	GCA_003144125.1
Ustilaginomycetes	Moesziomyces sp. F16C1 F16C1	GCA_003004725.1
Ustilaginomycetes	Moesziomyces sp. F5C1 F5C1	GCA_003004715.1
Ustilaginomycetes	Pseudozyma sp. F8B2 F8B2	GCA_003004685.1
Ustilaginomycetes	Ustilago tritici Utri01	GCA_002993085.1
Ustilaginomycetes	Sporisorium scitamineum SSC39B	GCA_001010845.1
Ustilaginomycetes	Sporisorium scitamineum 2014001	GCA_000772675.1
Ustilaginomycetes	Moesziomyces antarcticus JCM 10317	GCA_000747765.1
Ustilaginomycetes	Moesziomyces aphidis DSM 70725	GCA_000517465.1
Ustilaginomycetes	Kalmanozyma brasiliensis GHG001 GHG001	GCA_000497045.1
Ustilaginomycetes	Pseudozyma flocculosa PF 1 PF 1	GCA_000417875.1
Ustilaginomycetes	Pseudozyma hubeiensis SY62 SY62	GCA_000403515.1
Ustilaginomycetes	Sporisorium reilianum SRZ2	GCA_000230245.1
